# Supplementary material for: Convergent, functionally independent signaling by mu and delta opioid receptors in hippocampal parvalbumin interneurons
Source: eLife. 2021 Nov 17;10:e69746. doi: 10.7554/eLife.69746 (PMC8716102; doi:10.7554/eLife.69746)
Supplement: Figure 1—figure supplement 1—source data 1. [file elife-69746-fig1-figsupp1-data1.xlsx]

## Sheet: Figure S1D
Time (min)	Fraction eIPSC Suppression
0	1.12893	1.4156	0.51663	1.06323	1.00121	1.06242	0.883662	0.238849
0.333333	1.1259	1.32796	0.865618	1.00207	1.05864	1.14118	0.637359	0.62514
0.666667	1.02079	1.03585	0.790567	1.13279	1.06569	1.16721	0.878412	0.727506
1	0.988454	1.33619	0.862098	1.06531	0.977265	1.00507	0.986729	0.967662
1.33333	1.04182	0.96983	0.970704	1.07304	0.984266	1.13248	0.945017	0.957632
1.66667	1.05525	1.02072	0.798816	0.926857	1.00971	0.975658	0.981675	0.983261
2	1.08361	0.992941	0.982415	1.11659	1.03935	1.04948	0.603785	0.889115
2.33333	1.14342	1.02113	0.884538	1.1408	1.14554	1.0333	0.922351	0.961013
2.66667	1.00705	0.98802	0.85956	1.08377	0.904635	1.00682	1.09618	0.912759
3	1.02724	1.01342	0.994837	0.960904	1.04615	1.03043	0.907356	1.07843
3.33333	0.941799	0.950597	0.871636	1.1251	1.02725	1.08958	0.900971	0.952889
3.66667	1.03494	0.908665	0.874924	0.963482	0.994579	0.927046	0.990882	0.920268
4	1.0098	0.99289	1.29525	0.925074	0.91126	1.04058	1.05706	1.04115
4.33333	0.979861	1.01754	0.930132	1.0137	0.992094	1.01113	1.07945	1.00304
4.66667	1.00636	1.11689	1.03322	1.01174	1.02867	0.901224	1.06428	1.00423
5	1.09592	0.895378	0.994471	0.911535	1.00869	0.940865	1.0996	0.871144
5.33333	1.03166	0.890119	1.09038	0.920625	0.928583	0.991084	1.01432	0.980898
5.66667	0.963109	0.978259	0.887154	0.813093	0.923116	0.885147	0.62855	0.820025
6	0.935684	0.991142	0.819641	0.877921	0.969173	0.974967	1.07196	0.836376
6.33333	1.01557	1.08256	0.73336	0.930433	0.986455	0.845099	0.676275	0.919654
6.66667	0.936174	0.921899	0.704844	0.970826	1.0017	0.850592	0.709658	0.853109
7	0.890416	1.1099	0.628428	0.905169	0.93313	0.785732	0.723915	0.798176
7.33333	0.861716	1.0375	0.510611	0.89692	0.934061	0.838062	0.692005	0.877372
7.66667	0.803452	0.815122	0.637676	0.81272	0.90331	0.813416	0.684764	0.792859
8	0.873432	0.856896	0.583374	0.850945	0.849898	0.847963	0.667989	0.795211
8.33333	0.685348	0.729219	0.531763	0.753146	0.904064	0.798986	0.699939	0.768433
8.66667	0.795631	0.747498	0.437695	0.830704	0.827708	0.806076	0.724249	0.728555
9	0.728714	0.596142	0.456597	0.858916	0.8246	0.820238	0.700948	0.778214
9.33333	0.760861	0.652872	0.417081	0.806748	0.87249	0.819582	0.650187	0.784982
9.66667	0.721813	0.815724	0.488594		0.875208	0.805705	0.544	0.744487
10	0.672875	0.618891	0.511976		0.821002	0.825691	0.743895	0.827189
10.3333	0.736437	0.639862	0.572913		0.782523	0.617408	1.16118	0.777284
10.6667	0.672718	0.617941	0.520841		0.448029	0.722969	0.733878	0.789027
11	0.745517	0.846924	0.506554		0.821559	0.776975	1.14281	0.788471
11.3333	0.593225	0.716513	0.640542		0.785654	0.781234	1.03472	0.729094
11.6667	0.565417	0.627343	0.507343		0.773255	0.810886	1.01825	0.707116
12	0.606935	0.6953	0.539647		0.801438	0.789995	0.627717	0.72758
12.3333	0.646459	0.822865	0.403871		0.825846	0.753299	0.666371	0.760884
12.6667	0.662108	0.557202	0.466462		0.799722	0.766925	1.09556	0.797672
13	0.663015	0.711965	0.48423		0.808444	0.76353	0.629231	0.778264
13.3333	0.61621	0.633536	0.413543		0.755214	0.749836	1.16566	0.684801
13.6667	0.539712	0.617777	0.703594		0.767864	0.778455	1.15338	0.787928
14	0.540716	0.576203	0.5548			0.77283	1.136	0.799463
14.3333	0.494882	0.580119	0.669578			0.840527	1.0363	0.692937
14.6667	0.552916	0.781622	0.468827			0.785629	1.15602	0.676073
15	0.481738		0.521879			0.722957	1.17339	0.789216

## Sheet: Figure S1F
Time (min)	eIPSC (pA)	oIPSC (pA)
0	478.134	322.35
0.333333	747.412	515.764
0.666667	627.071	364.893
1	660.859	579.899
1.33333	664.534	400.803
1.66667	739.663	570.039
2	555.569	419.138
2.33333	663.715	448.125
2.66667	836.772	547.934
3	753.874	485.607
3.33333	770.368	507.27
3.66667	798.736	440.19
4	789.172	530.098
4.33333	576.1	436.865
4.66667	890.295	590.395
5	745.953	493.275
5.33333	571.021	472.4
5.66667	828.767	528.213
6	741.476	452.605
6.33333	693.802	429.306
6.66667	617.205	512.212
7	678.311	501.884
7.33333	716.791	564.301
7.66667	578.841	555.548
8	685.176	550.983
8.33333	655.818	538.415
8.66667	523.697	266.012
9	620.863	123.266
9.33333	611.875	152.192
9.66667	463.413	139.005
10	219.521	52.9217
10.3333	156.867	165.89
10.6667	224.24	144.621
11	192.79	119.62
11.3333	160.822	205.729
11.6667	215.794	197.758
12	210.296	205.15
12.3333	211.475	197.54
12.6667	273.244	171.711
13	263.222	152.509
13.3333	324.398	146.368
13.6667	260.601	201.218
14	261.029	161.186
14.3333	394.458	182.292
14.6667	315.494	199.314
15	328.832	244.936
15.3333	369.275	196.62
15.6667	299.292	194.012
16	256.252	168.568
16.3333	351.287	184.231
16.6667	415.588	241.724
17	217.368	204.02
17.3333	283.398	274.966
17.6667	339.032	211.057
18	319.971	203.416
18.3333	261.976	176.21
18.6667	396.607	233.987
19	391.803	151.876
19.3333	238.204	257.998
19.6667	224.721	256.572
20	251.146	255.306
20.3333	298.637	180.582
20.6667	289.331	239.637
21	282.379	295.247
21.3333	254.03	231.084
21.6667	179.874	200.198
22	192.721	230.792
22.3333	190.273	248.883
22.6667	152.501	232.851
23	70.9374	144.696
23.3333	98.1779	76.3206
23.6667	149.689	124.594
24	117	145.739
24.3333	160.542	115.301
24.6667	189.251	202.755
25	160.003	140.771
25.3333	154.272	131.615
25.6667	259.227	177.946
26	92.8589	161.965
26.3333	157.999	161.03
26.6667	133.326	139.421
27	184.635	137.314
27.3333	112.822	92.3313
27.6667	213.239	48.6499
28	104.925	135.396
28.3333	181.293	116.121
28.6667		190.203
29		178.223
29.3333		210.818
29.6667		84.9932
30		155.319

## Sheet: Figure S1E, G - I
Figure S1E: Fraction eIPSC Suppression
WIN	DAMGO	WIN+DAMGO
0.37714	0.706862	0.635246
0.347942	0.670865	0.853574
0.548024	0.685603	0.685467
0.15936	0.742009	0.879291
0.206013	0.665062	0.795844
0.234936	0.741498	0.778723
-0.13075	0.570187	0.767754
0.285468	0.786467	0.904023
	0.571605
	0.537165
	0.673428
	0.742436
Figure S1G: Fraction IPSC Suppression
DAMGO		SNC162
eIPSC	oIPSC	eIPSC	oIPSC
0.706862	0.849277	0.80192	0.957923
0.670865	0.655383	0.503206	0.821018
0.685603	0.800605	0.684503	0.6411
0.742009	0.75987	0.790584	0.654853
0.665062	0.4576	0.63718	0.739705
0.741498	0.897472	0.578182	0.739923
0.570187	0.572457	0.680379	0.746831
0.786467	0.453013	0.777109	0.516596
0.571605	0.72435	0.259313	0.517155
0.537165
0.673428
0.742436
0.807165
0.811488
Figure S1H: Fraction IPSC Suppression
opto				estim
DAMGO		SNC162		DAMGO		SNC162
early	late	early	late	early	late	early	late
0.849277	0.399865	0.957923	0.987621	0.670865	0.545178	0.80192	0.747379
0.655383	0.653466	0.821018	0.612259	0.742009	0.63246	0.503206	0.497077
0.800605	0.612437	0.6411	0.433924	0.665062	0.10442	0.684503	0.456561
0.75987	0.250452	0.654853	0.71286	0.741498	0.443041	0.790584	0.715901
0.4576	0.323757	0.739705	0.550958	0.570187	0.451419	0.63718	0.7022
0.897472	0.807512	0.739923	0.562662	0.786467	0.560408	0.578182	0.572861
0.572457	0.218595	0.746831	0.762733	0.571605	0.176419	0.680379	0.624769
0.453013	0.363508	0.516596	0.375582	0.754093	0.378549	0.777109	0.502541
0.72435	0.32835	0.517155	0.532159	0.537165	0.137281	0.259313	0.275392
				0.673428	0.431605
				0.742436	0.59279
				0.807165	0.461684
				0.811488	0.450988
Figure S1I: D Suppression
DAMGO		SNC162
eIPSC	oIPSC	eIPSC	oIPSC
0.125687	0.449412	0.054541	-0.0297
0.109549	0.001917	0.006129	0.208759
0.560642	0.188168	0.227942	0.207176
0.298457	0.509418	0.074683	-0.05801
0.118768	0.133843	-0.06502	0.188747
0.226059	0.08996	0.005321	0.177261
0.395186	0.353862	0.05561	-0.0159
0.375544	0.089505	0.274568	0.141014
0.399884	0.396	-0.016079	-0.015
0.241823
0.149646
0.345481
0.3605
