# Supplementary material for: Convergent, functionally independent signaling by mu and delta opioid receptors in hippocampal parvalbumin interneurons
Source: eLife. 2021 Nov 17;10:e69746. doi: 10.7554/eLife.69746 (PMC8716102; doi:10.7554/eLife.69746)
Supplement: Figure 1—source data 1. [file elife-69746-fig1-data1.xlsx]

## Sheet: Figure 1C
Time (min)	DAMGO									SNC162
-3	1.24256	0.834535	0.943694	1.24657	1.13878	1.13822	1.49435	1.02838	0.71528	1.07985	1.29311	1.16057	1.11131	0.990339	1.03218	0.989983	1.16995	1.53876
-2.66667	0.799249	0.889698	0.920398	0.880031	1.08145	0.998414	1.07297	0.955959	1.10397	1.07631	1.08526	1.07828	0.853562	0.948428	0.934412	0.962473	0.653354	0.745832
-2.33333	1.25348	0.849964	1.01824	0.853652	1.02501	1.15821	0.937243	1.04144	1.18083	1.08164	1.15755	0.685242	0.760799	1.06048	0.750476	1.06635	1.03486	0.995892
-2	1.11227	1.09435	1.01942	0.705576	0.798265	0.789741	1.26387	1.01582	1.07831	1.01229	1.17334	1.00326	0.945368	0.908687	1.07254	0.981085	0.953591	0.749995
-1.66667	1.02023	1.04167	0.992261	1.13917	0.940551	0.747748	1.02528	1.03222	0.765096	0.99564	1.17159	1.15838	1.17641	0.861909	0.942813	1.04809	0.993029	1.41201
-1.33333	1.19374	1.09801	0.946915	1.0842	1.03377	1.1173	0.88149	0.972743	1.00656	1.05592	0.951209	1.03804	1.10778	1.02836	1.26758	1.02658	1.12652	1.269
-1	1.05731	0.921326	0.961855	1.01064	0.816312	1.21767	0.986554	1.0004	1.11877	1.07858	0.83907	0.945476	1.05371	1.00762	0.907486	0.982965	1.24869	1.0558
-0.666667	0.715745	0.734746	0.993582	1.08015	1.10211	0.982003	0.905566	1.00197	1.13905	0.936125	0.920366	0.978991	1.11444	1.13294	0.839865	1.02284	0.826443	0.973727
-0.333333	1.16399	1.15285	0.888068	1.42985	0.93446	0.783304	1.52961	0.932901	0.941806	1.04124	0.879252	1.11762	1.15152	1.11536	1.10821	1.03893	1.13511	1.0774
-4.99956e-12	0.652297	1.03694	0.922299	1.10301	1.1728	0.633167	0.87957	0.912611	1.01157	1.06561	0.926217	0.937434	0.841946	1.1062	0.968702	0.967244	0.948557	0.960097
0.333333	1.07852	0.970343	0.848619	1.18777	0.975006	1.27681	0.722439	0.901152	1.07739	0.908293	0.81219	0.807599	1.00371	1.08097	0.937766	1.03073	0.768342	0.857037
0.666667	0.405138	0.181984	0.382254	0.681885	0.800486	0.542447	0.689341	0.399638	0.825504	0.0837184	0.45804	0.563069	0.666149	0.534067	0.495214	0.687524	0.688912	0.663589
1	0.047192	0.155868	0.308844	0.439817	0.55961	0.629418	0.574054	0.549024	0.388813	0.0817629	0.417433	0.206266	0.793795	0.247479	0.440781	0.571601	0.906844	0.420041
1.33333	0.181576	0.288024	0.259642	0.180378	0.569979	0.082038	0.64996	0.604435	0.316339	0.159471	0.430255	0.301297	0.487277	0.305554	0.271238	0.483257	1.0889	0.27324
1.66667	0.141455	0.181836	0.312747	0.237804	0.564208	0.054832	0.595384	0.340052	0.268182	0.0984667	0.245637	0.251475	0.679707	0.279077	0.533939	0.348765	0.775957	0.818225
2	0.356246	0.277267	0.28043	0.0459124	0.522923	0.113687	0.2507	0.571439	0.15622	0.0579176	0.320033	0.13792	0.657445	0.10625	0.486067	0.330744	0.462537	0.622888
2.33333	0.26873	0.333572	0.418356	0.0102878	0.539056	0.058202	0.280144	0.647294	0.223865	0.0583381	0.495682	0.2682	0.345962	0.333054	0.27915	0.331767	0.794724	0.328294
2.66667	0.299039	0.303089	0.368525	0.131319	0.498622	0.114423	0.616862	0.534636	0.402566	0.196843	0.745881	0.102346	0.474492	0.290354	0.171697	0.25216	0.679364	0.680809
3	0.210416	0.409687	0.317652	0.0628455	0.655797	0.153158	0.454853	0.456409	0.375687	0.0538673	0.582941	0.220341	0.335576	0.240158	0.272007	0.224255	0.305149	0.545865
3.33333	0.373517	0.217344	0.346962	0.503484	0.65891	0.112401	0.596246	0.537008	0.447363	0.119427	0.591338	0.11921	0.362042	0.413039	0.216296	0.29095	0.465976	0.533387
3.66667	0.357971	0.341935	0.351335	0.150487	0.644475	0.055625	0.366456	0.606634	0.476858	0.176819	0.621501	0.4636	0.441666	0.397034	0.230832	0.264189	0.699055	0.750164
4	0.319699	0.288715	0.400212	0.260458	0.726899	0.168539	0.659498	0.599739	0.444744	0.0611866	0.382909	0.233014	0.523378	0.411876	0.319199	0.255307	0.476556	0.589557
4.33333	0.343303	0.55398	0.374185	0.248553	0.416378	0.200814	1.0626	0.563353	0.361867	0.0747669	0.450336	0.23411	0.406147	0.396597	0.020145	0.283395	0.594621	0.476847
4.66667	0.203368	0.617559	0.379678	0.496919	0.559389	0.178414	0.615905	0.586775	0.421856	0.0569323	0.520978	0.355826	0.51429	0.344741	0.475866	0.320372	0.46472	0.561247
5	0.38346	0.429856	0.374869	0.221171	0.630523	0.062428	0.851698	0.590001	0.631878	0.0601015	0.625171	0.247414	0.489885	0.30619	0.32962	0.321807	0.713528	0.468242
5.33333	0.395556	0.558069	0.36599	0.365815	0.641641	0.42794	0.667767	0.682417	0.332705	0.0731372	0.560256	0.144608	0.256944	0.29386	0.423826	0.292178	0.454422	0.365169
5.66667	0.299231	0.632259	0.267541	0.731493	0.697633	0.574417	0.742361	0.683587	0.522528	0.0714162	0.342798	0.239975	0.322421	0.403982	0.283832	0.322607	0.588005	0.324579
6	0.250252	0.611915	0.28638	0.475242	0.732375	0.19677	0.582463	0.546039	0.710488	0.0661299	0.474484	0.409437	0.441138	0.323611	0.171243	0.300102	0.363245	0.300518
6.33333	0.434497	0.547612	0.395342	0.420121	0.476535	0.149092	0.688793	0.576022	0.584902	0.0650504	0.701212	0.360392	0.233068	0.365984	0.340344	0.330636	0.339424	0.556488
6.66667	0.454622	0.855963	0.300032	0.300379	0.675226	0.060981	0.461993	0.633439	0.539849	0.0573819	0.728755	0.357385	0.478156	0.400159	0.302999	0.355767	0.409033	0.613401
7	0.331101	0.414783	0.304397	0.286945	0.600742	0.368713	0.856067	0.557632	0.335406	0.0716302	0.647291	0.479548	0.306481	0.491753	0.151428	0.320177	0.427635	0.57832
7.33333	0.400835	0.40991	0.458249	0.140069	0.609045	0.0777	0.963604	0.5828	0.906684	0.0513799	0.825482	0.504276	0.41665	0.394751	0.37396	0.30697	0.339542	0.965695
7.66667	0.406116	0.630333	0.350627	0.677964	0.598956	0.064711	1.19656	0.67009	0.579381	0.0828579	0.730346	0.0268868	0.311322	0.389515	0.351527	0.307926	0.268635	0.982106
8	0.350904	0.463978	0.315364	0.764561	0.469031	0.181416	0.98906	0.641434	0.70571	0.0713509	0.399361	0.087796	0.306077	0.33843	0.284712	0.256404	0.472847	0.446721
8.33333	0.381805	0.519362	0.317634	0.398884	0.610393	0.192568	0.885963	0.682246	0.8379	0.0653929	0.406779	0.617504	0.161251	0.369878	0.225544	0.269681	0.482697	0.325677
8.66667	0.37676	0.694266	0.279598	0.648993	0.664466	0.136796	1.18046	0.559014	0.396289	0.0500968	0.578886	0.519386	0.508577	0.485304	0.14049	0.272228	0.50219	0.866367
9	0.351024	0.759232	0.281907	0.721508	0.662349	0.217928	0.632091	0.648554	0.525704	0.189218	0.662017	0.538642	0.404694	0.409607	0.311112	0.245348	0.237552	0.467618
9.33333	0.439926	0.708533	0.275185	0.653543	0.69213	0.303971	0.652274	0.584251	0.675919	0.0483188	0.620983	0.203727	0.355898	0.552044	0.471447	0.309002	0.593364	0.590092
9.66667	0.441753	0.790729	0.214727	0.736785	0.734056	0.137613	0.705659	0.663358	0.658324	0.10947	0.58733	0.18691	0.199631	0.423736	0.347239	0.301607	0.690753	0.379309
10	0.53545	0.590012	0.305674	0.635633	0.701343		0.886986	0.681528	0.703886	0.0695514	0.629323	0.0279112	0.254963	0.408394	0.553212	0.304196	0.760935	0.629828

## Sheet: Figure 1D-J
Figure 1D: Fraction oIPSC suppression
DAMGO	SNC	both
0.849277	0.957923	0.885954
0.655383	0.821018	0.91991
0.800605	0.6411	0.835124
0.75987	0.654853	0.776157
0.4576	0.739705	0.667403
0.897472	0.739923	0.886139
0.572457	0.746831	0.668745
0.453013	0.516596	0.635982
0.72435	0.517155	0.718472
		0.987621
		0.650239
		0.716514
		0.890768
		0.730475
		0.534292
		0.837103
		0.588159
		0.798654
Figure 1E: Peak 2 / Peak 1
BL	DAMGO	BL	SNC
0.417896	1.45115	0.16793	0.197563
0.582711	0.57825	0.430908	0.679018
0.208627	0.219121	0.674976	0.865121
0.337968	0.437691	0.354235	0.69485
0.378153	0.426626	0.460005	0.66222
1.08239	1.27848	0.355054	0.435623
0.393979	0.588912	0.468527	0.47639
0.436781	0.545901	0.486786	0.485865
0.385969	0.556233
Figure 1I: Fraction eIPSC suppression
DAMGO	SNC	both
0.706862	0.80192	0.909148
0.670865	0.503206	0.805897
0.685603	0.684503	0.803299
0.742009	0.790584	0.852494
0.665062	0.63718	0.816346
0.741498	0.578182	0.86206
0.570187	0.680379	0.784677
0.786467	0.777109	0.556334
0.571605	0.259313	0.857011
0.537165		0.445426
0.673428		0.742099
0.742436		0.630715
0.807165		0.792063
0.811488		0.59279
Figure 1J: Peak 2 / Peak 1
BL	DAMGO	BL	SNC
0.612411	0.737808	0.653003	0.887328
0.641827	0.740096	0.741597	0.614806
0.623527	0.715337	0.716971	0.826825
0.748528	0.953673	0.670338	0.858983
0.645963	0.817317	0.592058	0.7005
0.687463	0.666207	0.697756	0.771331
0.743949	0.587256	0.591996	0.95013
0.442716	0.69744	0.576695	0.704599
0.700056	0.949882	0.634071	0.583066
0.794893	1.03697
0.706623	0.843547

## Sheet: FIgure 1H
Time (min)	DAMGO															SNC162
-3	0.892329	1.00933	1.0731	1.07122	0.81526	0.985526	1.0175	0.920662	0.834098	0.969464	1.01973	1.21854	1.1685	0.58257	0.898614	1.06171	1.11931	1.09854	1.05127	0.732301	0.935452	0.877032	1.14172	0.896521
-2.66667	0.845481	0.96582	1.0116	1.03983	0.856696	0.869825	0.928745	1.03991	1.00502	0.965293	0.887327	1.08401	1.16289	0.580247	1.13721	1.1232	0.890833	1.061	1.01988	1.03938	0.825315	1.01103	1.01788	1.10274
-2.33333	1.04783	1.05841	0.93269	0.943594	1.16171	0.803148	0.906204	0.946198	0.949473	1.00573	0.89873	1.19133	0.933188	1.2745	1.05855	0.927833	0.853566	1.24049	0.954852	1.04461	1.05628	0.973337	0.939543	1.08423
-2	0.986894	1.01473	1.03892	0.935289	0.962602	0.971441	1.00048	1.02304	0.883812	0.97589	0.927452	1.25892	0.975171	1.02021	1.03441	1.08352	1.16015	1.07785	0.993199	0.987509	1.05882	1.00385	1.01427	0.909171
-1.66667	1.06558	0.982325	1.08785	0.933861	0.955446	0.93488	0.878218	1.00918	1.01153	1.0262	1.01651	1.01663	1.07738	0.91807	0.95389	0.964883	1.02346	1.02844	1.04273	1.06246	1.02809	0.883891	0.950852	1.11507
-1.33333	1.02593	0.99763	0.964449	1.0762	0.834405	0.93513	0.962158	1.02645	0.992662	0.987955	1.11194	1.20339	0.966734	1.05346	0.908846	0.918204	1.09012	0.911227	1.10191	0.881768	0.959049	0.922863	0.971368	0.99648
-1	1.04147	0.919706	0.964493	1.06937	1.32818	1.07766	0.91338	0.983868	1.05817	1.03893	1.03761	1.15183	1.18405	0.886371	1.03679	0.982362	0.990977	0.937392	0.955198	1.09504	1.04889	0.91923	1.1148	0.988799
-0.666667	0.959037	0.931696	0.974873	1.01672	0.996578	1.08756	0.874713	1.01127	1.00335	0.992974	0.949635	0.919783	0.863482	1.03519	0.961484	1.0476	1.04775	0.975471	1.09321	0.951695	0.848876	0.565372	1.12047	1.15655
-0.333333	1.03401	1.05827	0.986228	0.995122	0.922789	0.993333	0.919452	1.00278	1.05048	1.0054	1.07478	1.09044	0.991178	0.985598	0.895626	0.815221	0.948069	0.93092	1.11735	0.971537	1.08493	0.917072	1.03409	1.01561
-4.99956e-12	1.01454	1.05383	0.811432	0.978314	0.991613	1.00042	0.787131	0.913901	0.974283	0.921299	0.993426	1.07465	0.999906	0.929981	0.93601	1.03258	0.547006	0.951736	1.10331	0.915562	1.08109	0.834791	1.02898	1.00202
0.333333	0.834228	0.551277	0.392512	0.694226	0.511694	0.356983	0.876645	0.579082	0.78735	0.46185	0.807042	0.813904	0.716321	0.804116	0.455295	0.533133	0.705293	0.455413	0.571396	0.349554	0.757542	0.580372	0.860832	0.659553
0.666667	0.248399	0.355056	0.122655	0.397629	0.419559	0.270425	0.366963	0.320223	0.24139	0.345603	0.817936	0.385551	0.324653	0.314542	0.299225	0.325488	0.475508	0.466783	0.395018	0.299087	0.536451	0.344209	0.828305	0.704949
1	0.22529	0.370953	0.188389	0.349209	0.340618	0.255911	0.237286	0.226824	0.251945	0.308562	0.605375	0.275509	0.221682	0.14945	0.259624	0.227553	0.52257	0.406706	0.292911	0.252001	0.470386	0.389144	0.883975	0.818266
1.33333	0.256955	0.391081	0.25045	0.391546	0.3216	0.360917	0.369424	0.226772	0.270487	0.255625	0.53195	0.393838	0.322459	0.117534	0.145691	0.152186	0.423228	0.454846	0.313534	0.304042	0.436621	0.273372	0.619747	0.752556
1.66667	0.182103	0.557152	0.157176	0.349003	0.265757	0.329172	0.383539	0.29732	0.32872	0.315908	0.526771	0.338601	0.14916	0.247601	0.205174	0.258501	0.499918	0.385627	0.314682	0.335645	0.290418	0.294838	0.449357	0.852619
2	0.223077	0.450634	0.371861	0.397262	0.334415	0.379755	0.3908	0.294492	0.260207	0.30725	0.479033	0.282455	0.469921	0.214353	0.162968	0.11783	0.567579	0.267962	0.252054	0.243707	0.350615	0.262743	0.453986	0.722617
2.33333	0.339617	0.398342	0.190668	0.484995	0.259188	0.413452	0.289581	0.310032	0.27053	0.372117	0.473713	0.379004	0.183802	0.151467	0.181198	0.118024	0.473328	0.358894	0.158145	0.33035	0.339378	0.254255	0.49924	0.817212
2.66667	0.261387	0.39439	0.236361	0.45539	0.241718	0.352932	0.22465	0.317587	0.282111	0.326918	0.3503	0.369349	0.183082	0.276603	0.19598	0.226339	0.470822	0.248746	0.256823	0.236327	0.395579	0.165551	0.415511	0.935378
3	0.25067	0.457693	0.318585	0.4629	0.202365	0.477968	0.205626	0.381719	0.262236	0.392066	0.499916	0.371419	0.350001	0.394104	0.217772	0.090843	0.624855	0.412705	0.131186	0.263549	0.355134	0.282802	0.363608	0.70776
3.33333	0.326659	0.37298	0.346111	0.419576	0.247572	0.389262	0.38712	0.310904	0.375433	0.403809	0.447279	0.479906	0.218635	0.272122	0.289026	0.27632	0.510389	0.41216	0.232441	0.252596	0.303077	0.30713	0.322214	0.847406
3.66667	0.432699	0.546598	0.283199	0.608853	0.30979	0.412862	0.253654	0.387131	0.33609	0.473133	0.577124	0.462303	0.289042	0.356812	0.296142	0.232148	0.544755	0.26373	0.235362	0.223843	0.403341	0.448983	0.400336	0.63556
4	0.415527	0.473833	0.255893	0.525446	0.497843	0.447062	0.216575	0.267437	0.38993	0.429227	0.561722	0.569748	0.322776	0.149844	0.410602	0.0925	0.50858	0.387465	0.232167	0.267802	0.311507	0.465228	0.42941	0.775341
4.33333	0.434204	0.421935	0.161513	0.568964	0.561736	0.381671	0.260324	0.318967	0.510927	0.338902	0.623608	0.457699	0.483152	0.202308	0.23798	0.209568	0.487509	0.456714	0.187915	0.256042	0.46109	0.238986	0.325866	0.699991
4.66667	0.309812	0.430831	0.434618	0.646479	0.678937	0.535224	0.270654	0.3678	0.401694	0.446674	0.779378	0.458452	0.150417	0.235227	0.586289	0.193911	0.398089	0.413148	0.308	0.301639	0.415273	0.260711	0.197273	0.813689
5	0.362255	0.630638	0.464868	0.592305	0.783439	0.575349	0.315077	0.32396	0.403679	0.54185	0.693673	0.692796	0.362741	0.333533	0.606727	0.172503	0.482485	0.375731	0.290629	0.276373	0.329294	0.205181	0.238802	0.71714
5.33333	0.370435	0.537184	0.317026	0.558703	0.627958	0.503131	0.203118	0.281407	0.45685	0.533459	0.873536	0.55411	0.271423	0.665312	0.416239	0.182595	0.463881	0.390507	0.27575	0.237071	0.422	0.365235	0.289688	0.649874
5.66667	0.44794	0.483434	0.435779	0.563648	0.504234	0.403132	0.277157	0.445959	0.506047	0.606712	0.720894	0.577537	0.228278	0.657345	0.65243	0.279223	0.376035	0.52808	0.180639	0.25434	0.434146	0.240784	0.185193	0.765664
6	0.470138	0.494796	0.351313	0.54943	0.502374	0.494825	0.325993	0.362184	0.496658	0.427785	0.58604	0.648567	0.234918	0.613988	0.410291	0.237891	0.531164	0.493024	0.179866	0.380625	0.447346	0.326346	0.194391	0.674443
6.33333	0.332885	0.457344	0.378122	0.631636	0.492166	0.498267	0.314165	0.343486	0.413774	0.626887	0.64588	0.525653	0.325778	0.626758	0.556346	0.294538	0.59003	0.502884	0.318049	0.209275	0.356739	0.274264	0.316108	0.75551
6.66667	0.413867	0.57696	0.275706	0.45377	0.593157	0.432183	0.403301	0.349833	0.491635	0.502623	0.660916	0.450061	0.180549	0.414655	0.439858	0.255633	0.386216	0.473906	0.289137	0.329244	0.373116	0.313783	0.27534	0.680591
7	0.419321	0.504832	0.329077	0.534299	0.697171	0.647309	0.339206	0.416272	0.409609	0.499488	0.71197	0.616973	0.596232	0.541436	0.533941	0.199042	0.437611	0.696505	0.265235	0.239985	0.539716	0.307669	0.404439	0.657176
7.33333	0.38998	0.59175	0.336599	0.560684	0.40009	0.639618	0.336798	0.43587	0.298116	0.561533	0.751482	0.729908	0.234015	0.553729	0.661473	0.107508	0.48036	0.569183	0.264133	0.310294	0.37562	0.282886	0.325516	0.704685
7.66667	0.37427	0.665489	0.40562	0.650727	0.380527	0.642026	0.360228	0.390987	0.463258	0.54856	0.706554	0.381768	0.389839	0.550802	0.52948	0.302148	0.468128	0.617983	0.409127	0.4292	0.441316	0.327915	0.334026	0.735984
8	0.369633	0.70042	0.656042	0.456547	0.364438	0.458951	0.388298	0.405771	0.424034	0.564203	0.679478	0.49774	0.438387	0.312634	0.53016	0.123488	0.490961	0.437426	0.218894	0.311528	0.306185	0.311944	0.423121	0.757021
8.33333	0.334976	0.558336	0.359696	0.532736	0.477132	0.589022	0.363787	0.42925	0.397462	0.661465	0.744153	0.59545	0.482487	0.54999	0.566728	0.422272	0.544131	0.62677	0.357606	0.33422	0.358094	0.311798	0.573286	0.952275
8.66667	0.513145	0.664209	0.38299	0.658764	0.646805	0.612439	0.335651	0.494576	0.374213	0.620647	0.752159	0.561973	0.624695	0.724935		0.179136	0.617657	0.664459	0.203995	0.216442	0.391548	0.52791	0.363258	0.664107
9	0.5934	0.622583	0.446108	0.751092	0.580743	0.713467	0.4173	0.463855	0.523103	0.67666	0.772373	0.460116	0.295523	0.483296		0.252456	0.47419	0.556122	0.167475	0.339069	0.409175	0.409356	0.527865	0.647341
9.33333	0.657324	0.7002	0.36065	0.603824	0.659418	0.80384	0.389479	0.481452	0.500253	0.669884	0.555017	0.696571	0.386596	0.537037		0.392401	0.598325	0.485258	0.393658	0.171355		0.254392	0.356015	0.850149
9.66667	0.393752	0.644332	0.534224	0.615205	0.600923	0.776892	0.343672	0.457296	0.587308	0.725081	0.757572	0.688134	0.315088	0.622005		0.261857	0.411293	0.631339	0.313087	0.414185		0.461665	0.566702	0.708428
10	0.53869	0.873806	0.553884	0.605995	0.376732	0.947191	0.355348	0.485784	0.417621	0.620366	0.571409	0.418363	0.357969			0.393384	0.394296	0.647336	0.353379	0.385006		0.32374	0.344535	0.696228
