# Supplementary material for: Convergent, functionally independent signaling by mu and delta opioid receptors in hippocampal parvalbumin interneurons
Source: eLife. 2021 Nov 17;10:e69746. doi: 10.7554/eLife.69746 (PMC8716102; doi:10.7554/eLife.69746)
Supplement: Figure 2—source data 1. [file elife-69746-fig2-data1.xlsx]

## Sheet: Figure 3C-D
Figure 3C: (DG/R)/Gsat
1AP
BL	DAMGO	+ SNC162
0.010084	0.00664	0.00590503
0.011615	0.005912	0.00432949
0.017112	0.013188	0.0117355
0.012293	0.011212	0.00968311
0.013683	0.011073	0.00834302
0.011585	0.00873	0.00892262
0.014183	0.011937	0.0121115
0.023502	0.014633	0.01239
0.017069	0.009631	0.00982371
0.012902	0.014777	0.0118295
5AP
BL	DAMGO	+ SNC162
0.021818	0.018049	0.0128159
0.013617	0.013216	0.010886
0.046589	0.030016	0.0259855
0.03432	0.024873	0.0256804
0.029361	0.021462	0.0171562
0.032144	0.021135	0.0182448
0.036886	0.031522	0.0245748
0.051706	0.041448	0.0435747
0.026063	0.023349	0.017063
0.02246	0.024282	0.0189802
Figure 3D: (DG/R)/Gsat
1AP
BL	SNC162	+ DAMGO
0.012206	0.011166	0.00959906
0.010372	0.011687	0.0075261
0.009747	0.003905	0.0041359
0.007344	0.004583	0.00420928
0.011852	0.007172	0.00622604
0.007762	0.006743	0.00375302
0.022304	0.011737	0.0113333
0.018779	0.014061	0.00813554
0.010909	0.008025	0.00598434
0.012311	0.009631	0.0072245
0.01568	0.008902	0.00571757
0.010777	0.006218	0.00753458
0.031169	0.02147	0.0129612
0.020942	0.013833	0.0146682
5AP
BL	SNC162	+ DAMGO
0.032954	0.032364	0.0263205
0.03208	0.03042	0.0238341
0.027662	0.016644	0.0161917
0.022815	0.01615	0.0155556
0.034554	0.017961	0.0201775
0.02528	0.016739	0.0136491
0.065595	0.041544	0.0283543
0.061554	0.038818	0.0273453
0.029334	0.023472	0.0199389
0.030538	0.026875	0.0217384
0.03204	0.023987	0.0186169
0.031452	0.021559	0.017347
0.068078	0.050813	0.041493
0.057045	0.047399	0.0353979
