# Supplementary material for: Convergent, functionally independent signaling by mu and delta opioid receptors in hippocampal parvalbumin interneurons
Source: eLife. 2021 Nov 17;10:e69746. doi: 10.7554/eLife.69746 (PMC8716102; doi:10.7554/eLife.69746)
Supplement: Figure 4—figure supplement 1—source data 1. [file elife-69746-fig4-figsupp1-data1.xlsx]

## Sheet: Figure S2A
	ACSF																					CTOP
Time (s)	ACSF													+ Ba2+								CTOP														+ Ba2+										+ Ba2+, ZD7288
0	-0.386948	-5.33875	8.64467	3.17496	0.151508	0.586951	2.2655	-2.26735	0.820822	-4.4388	4.59591	-2.85359	5.21002	2.0947	-29.5285	0.413996	-5.11484	1.60358	-7.565	-1.7961	5.09563	-6.13932	2.73468	2.61335	-2.59973	8.1078	2.69886	-1.11676	-0.84078	-4.15805	-3.19361	1.40304	-2.31102	-1.97633	4.24619	0.267036	-0.682803	10.5549	-8.11486	-3.49365	-5.85015	-2.10271	-0.162538	-3.20385	-1.15669	1.05671	-3.03535	-3.27457	-1.13754
0.1	5.2791	4.74203	5.86985	3.64444	-6.71266	-0.404642	1.42333	3.09429	-4.59286	-2.2566	-2.31002	1.6255	2.96597	5.04209	-6.78071	1.90935	-1.5533	1.1325	-3.93664	3.26522	-1.4281	-2.93364	6.85527	-1.7715	-3.41463	9.01743	2.03793	-0.847679	8.44807	-1.59228	-6.51626	1.52659	0.972642	1.50023	1.77085	8.19336	0.265019	7.71352	-5.87444	-0.371502	-2.31641	-1.54605	3.898	0.318449	2.66815	-0.2485	1.70316	-0.540506	-4.61538
0.2	0.451283	2.49434	10.114	0.554642	-2.23853	1.66348	4.80949	0.470868	2.46339	0.839901	-3.26393	0.676187	-10.0826	1.31333	-15.5165	1.96183	-0.705506	0.334577	-6.63403	3.38327	-0.812514	0.807653	0.157415	-0.665618	-3.21413	7.0156	-0.127358	3.45305	5.21876	1.0802	-5.6806	-3.69567	6.75827	-3.46935	4.83715	0.609746	-0.697822	10.5411	-2.17008	0.0675584	-1.91894	-4.7659	3.66103	-1.94827	0.525241	-4.37716	3.22873	-3.96002	-3.70154
0.3	-1.65424	-0.716282	4.34816	5.97406	1.84171	-1.71782	1.78497	0.813418	0.549782	-0.29187	0.121029	1.39726	-3.37613	3.85387	-23.0207	3.19461	-2.91066	0.495697	-5.99971	1.79103	4.20903	-0.667442	6.89053	-7.39706	-1.67379	10.6008	0.933793	-6.28986	2.49872	-1.92066	-9.04899	-0.0636561	-2.67059	-2.71932	-1.04528	1.27905	1.68527	5.2421	-2.84978	1.48094	-7.51283	-1.3564	1.15364	5.15441	-3.46642	-3.51187	0.697183	-2.42986	-7.23479
0.4	4.58841	2.51355	3.1416	4.24768	-2.30061	2.45505	2.36838	0.768533	1.07185	0.675432	2.43004	0.908051	-4.01765	2.54223	-18.2809	1.5447	-1.73263	2.46524	-4.52797	0.991949	0.083521	3.23504	5.45555	1.23715	0.242468	5.3099	-0.717505	2.04316	-0.855069	-0.0311438	-13.6514	-3.59023	2.7199	1.39018	5.01476	0.693681	-0.748375	8.08377	1.61768	-1.68377	-3.87498	-2.54197	2.16212	0.823572	2.14811	-2.084	1.18892	-2.62179	-4.35916
0.5	-6.4106	3.07031	9.55349	8.48819	-1.26257	-0.954553	2.25056	0.544518	1.79266	-2.83991	2.18427	-0.364297	2.25221	3.92041	-29.4585	7.23233	0.764226	-0.464207	-5.42813	2.68625	1.45113	-2.12833	1.54104	-2.14387	-6.40283	8.54565	-0.286315	-6.28313	-1.37107	-1.0117	-6.62415	-5.13279	10.5868	-0.00491504	3.12382	2.16151	-2.20666	-2.62048	0.475186	-3.00871	-8.29724	-0.580192	3.62575	-2.25912	0.0382951	-4.81064	4.51517	0.211363	-4.81763
0.6	-5.00024	-1.27957	7.94558	3.17527	0.897308	2.69047	0.948958	-0.526912	1.28989	-1.25371	-3.73475	1.24443	-2.37466	1.65316	-17.785	-2.43958	-0.168973	0.617779	-5.65083	-3.15377	-0.0435412	-0.283658	3.99786	-5.46165	-2.178	7.70839	0.0954122	2.06903	-2.97182	-1.20484	-5.51885	1.355	-6.62375	0.860603	7.59563	3.42054	1.07581	-5.16858	1.65717	-0.463496	-4.52741	1.37934	3.07699	0.164564	3.3987	-4.70479	3.35543	-2.44824	-1.94305
0.7	0.469736	-0.832922	4.52321	0.0956863	2.51578	0.998287	-0.290424	-0.355124	-2.18551	4.01977	-2.21022	0.330324	0.831261	6.24522	-11.0395	5.95313	1.08026	-1.1517	-0.0220565	-1.19982	2.12645	0.997918	5.85762	6.02289	-4.50693	8.93563	0.487655	1.12667	-8.45239	-1.32819	-11.7999	0.85168	2.48629	1.89814	4.23493	2.21578	0.567449	-2.73344	0.137685	-2.0836	-4.11173	1.04001	-3.15044	-0.711894	-2.24519	-3.89922	4.12293	-0.873475	2.16071
0.8	4.28762	2.90388	3.70512	5.42222	-1.10958	-0.828201	1.15908	1.37846	-2.6538	-0.401929	-2.22298	1.152	-3.6208	2.39669	-11.4149	0.85039	3.40409	-1.57329	-5.01905	-1.29329	-0.759711	-1.75906	1.72902	-2.36144	-3.44256	7.98413	1.13054	-0.908655	-0.658787	-0.525932	-4.75469	-5.55053	1.6818	0.878719	-0.295587	5.06537	2.79958	-5.21467	0.449207	1.57246	-4.81062	-1.33629	2.34499	0.525213	0.583987	-1.53948	5.09798	0.982265	-4.10157
0.9	-5.26103	-2.2389	8.56018	5.95037	3.08228	0.641037	1.22013	0.428448	-1.81257	1.05299	-1.97946	-4.9389	-4.52869	-1.75443	-14.6165	4.11616	3.29258	0.30541	-2.01015	2.06534	-4.98087	4.01307	3.74516	-4.97837	-0.105622	-0.851682	-0.338636	6.93206	1.0082	-1.06241	-0.322657	-1.21449	11.4044	0.422321	-0.596579	3.48911	1.84069	-3.2265	2.34111	-1.68525	-4.87668	-0.519786	1.19682	0.281868	-1.41956	-1.5112	1.41532	-0.206865	-5.6678
1	3.54819	-0.00864544	7.83095	0.235237	-2.08095	-1.51526	1.08809	1.44562	-3.30867	-1.20723	-1.29129	-0.0643978	-9.78929	0.10719	-13.2086	-2.02049	0.87307	3.35447	-5.1195	2.26379	-5.19233	-2.05513	1.89631	-3.03208	2.28215	2.70798	0.217992	-5.6519	-1.41148	-3.00086	-2.70725	2.29731	6.7096	1.95989	-2.77623	1.33683	-0.506683	0.48666	0.370641	1.83946	-0.37685	-1.9967	-0.489429	-5.48998	0.209172	-2.75933	3.04182	-1.3313	-4.10897
1.1	-4.85869	-2.04306	4.04905	3.18166	-2.66065	0.0369657	3.61795	1.80441	-3.88349	1.46386	-2.40919	4.92782	-2.1758	2.48864	-7.47057	1.41709	-0.367033	-3.75856	-2.01173	-4.04074	-3.03113	2.91153	8.43398	-4.37167	3.92737	-0.871012	-1.25876	-5.78092	0.159389	-1.76792	4.29067	6.70375	-2.55686	1.68799	-10.9959	-1.0143	3.52832	3.63715	3.11072	-1.16009	-2.04419	-1.92115	6.37655	-3.48731	-4.45423	-4.1136	3.9885	-0.406968	-5.1043
1.2	-2.39826	1.01509	2.94408	0.911777	-6.63532	1.22507	4.37096	2.69278	-0.495795	-1.35055	-1.91033	7.63149	-7.78745	-0.904239	-4.47704	2.35405	0.61062	-2.14326	-3.17566	2.48425	1.76512	0.43553	5.51428	-3.71701	1.40296	1.66254	2.8626	-3.00458	2.07636	-1.10421	-0.294117	-7.2898	5.21664	1.16483	1.23609	0.166282	0.71404	1.2755	2.05043	-0.123948	-4.98922	-0.544498	1.48089	-1.15657	0.321326	-1.82299	-0.365082	1.7454	-0.541898
1.3	-1.98092	1.05954	-0.904923	4.27986	0.404143	0.0360933	0.267239	-0.255506	-0.269747	0.727867	-4.30296	3.82732	-8.35177	0.820009	-9.67742	3.16942	2.49531	-0.312772	-0.631868	1.10013	0.889863	-2.94847	1.54672	-3.59536	3.23779	0.617855	0.492542	0.528308	2.28609	0.234696	-8.53514	-2.984	6.73157	0.0929696	-1.05365	-1.29745	1.62193	-3.75771	-0.251591	0.385813	0.0172266	-1.06556	-0.00823355	-5.94019	-1.85294	-3.61936	-2.65703	2.16768	-1.15263
1.4	0.141715	-3.31094	4.03565	3.85748	-4.67002	-1.22952	0.0606336	0.30493	2.73531	-1.74242	1.05637	-0.670431	2.08491	3.68131	0.508584	1.86128	1.5285	-7.39276	-2.62476	-0.827641	-1.92291	7.49694	4.97693	0.930347	-0.282461	-2.32835	0.0515429	1.26336	0.535028	-2.23038	0.304774	-1.74052	-3.531	1.77239	0.971529	3.37619	-1.96315	-4.46473	0.162291	-0.847588	-2.92575	0.721757	0.000662561	-7.535	0.739846	-1.96547	3.53325	-0.00233778	-3.04658
1.5	2.49646	0.194748	1.07768	0.0138776	-1.12756	-0.749002	-1.42403	0.975432	0.145996	-2.9845	0.974212	5.71978	-9.55934	-1.31547	4.50804	1.91588	2.60664	-1.75367	-3.81233	0.176676	-2.10135	2.46301	1.63969	3.15221	-3.16742	2.72808	1.78115	0.706444	6.49255	-1.51519	-2.52856	2.42065	0.648456	4.89594	-1.3363	-2.60437	-1.26674	2.17219	-1.3206	0.835483	-3.59384	1.64073	5.30626	-6.51005	-1.55509	-0.232364	1.63694	-1.57391	-1.70999
1.6	0.3624	-1.60551	1.55085	2.87923	-4.44373	0.939319	-0.857412	0.788561	-0.575062	-4.65723	0.675212	-0.352344	-9.16489	1.98053	-7.8005	1.02395	3.27569	0.512194	-2.57717	2.42043	1.6721	0.00477477	4.58583	-2.1166	-1.43829	2.69831	1.58577	1.46807	-1.94314	-1.84564	2.37607	-1.6867	4.82496	1.81415	-0.063599	1.34842	1.84905	0.0485574	-0.792451	-0.204026	-2.69181	1.40285	1.36474	-3.55232	2.96528	-0.735112	-0.301517	5.59527	-4.39292
1.7	-1.50204	-1.02357	3.30124	-0.975432	-6.67393	0.269143	1.77483	-0.755865	0.941556	-1.31565	-1.39391	0.318014	-3.86017	2.42425	-8.00584	0.83655	3.19715	-2.66212	-1.90951	2.80049	-2.67236	1.29343	9.13933	-1.37084	0.632893	1.55438	-0.10333	0.456085	-2.15909	0.970494	1.80083	2.15919	2.20929	-1.78727	2.5841	2.75911	-1.25058	1.00775	0.641363	4.19786	-7.67066	-1.12627	0.225139	-2.96151	0.390204	1.45857	2.05181	1.31356	-0.570042
1.8	1.99383	-5.59102	3.90785	9.40666	-0.725779	-0.862189	1.31264	-1.84436	-0.118278	1.33486	-3.74411	1.60275	-6.79762	-1.96387	-12.9936	3.00428	0.316797	2.48401	1.03638	-2.71694	0.763592	-3.85924	9.11075	1.29966	1.40274	-2.04389	1.52803	0.323236	-1.32473	-0.385905	7.51476	5.85574	7.59566	-0.78749	0.7154	2.64677	-0.78164	-2.28229	-1.3832	-2.91481	-5.51407	-1.02576	0.366662	-8.43938	0.929245	2.00176	3.073	-1.07639	-2.0796
1.9	2.15468	-2.85323	0.285832	-1.16136	0.399184	-0.810922	3.85031	0.018946	0.653619	-0.771014	-2.4387	-0.0821373	2.91152	-1.43086	7.98862	-1.70271	2.34812	0.322976	-0.523256	1.00891	-2.39449	-0.31113	3.67292	3.90095	1.30562	2.31114	-1.28994	-2.58052	6.38966	-1.05093	5.21642	-8.64276	2.22317	0.750697	0.647459	-2.41605	-1.67975	0.142919	1.53552	3.12573	-5.66711	-1.27101	1.08863	-7.30008	-1.83226	0.0142148	-0.635135	-0.488322	0.608521
2	-0.474064	-2.42573	-3.63924	1.47144	-2.313	0.685948	1.44904	-0.444438	2.73178	0.202291	-5.10253	-0.901402	-5.13456	2.41469	-8.17594	0.246778	1.47279	0.203915	-2.99434	-2.8508	-0.262245	-5.91493	-1.64248	-5.60457	-0.146858	0.51876	0.288145	-0.263827	0.748358	-0.700935	5.5999	-5.56508	-4.4112	-2.7586	-2.69137	2.25265	-0.314437	-2.65901	-0.351773	-0.452446	-3.14026	2.11348	3.80993	-2.33577	-1.43015	-3.38084	-0.479222	-0.185038	-1.5464
2.1	-3.32801	4.75981	-9.15636	-1.30909	-1.65658	0.222612	-1.17799	0.089778	3.12347	-2.28348	-6.63599	0.969355	-7.67566	-1.14152	2.29932	-2.76222	5.29484	1.89189	-3.01468	-1.61074	0.643209	-1.99056	2.51884	7.15108	-6.70103	-1.57997	-2.45741	1.65551	-1.94807	1.23683	4.30112	-6.6007	-9.38502	-2.52736	-8.70286	0.211164	-0.330403	0.565133	0.398004	-5.04032	-3.72523	-1.19537	2.48055	2.20866	-0.985586	-0.66653	-3.81934	0.944814	2.90606
2.2	-1.28953	-2.58476	-1.39356	-4.59513	2.51481	-1.95161	-0.915071	-0.322157	2.14454	-3.21204	-3.55701	0.652864	-5.08547	-5.96646	-1.42781	2.47988	3.54902	-0.674445	-0.166349	7.20358	-1.25443	3.31388	0.375558	-2.41049	-2.88828	1.60864	1.1847	6.40571	0.519246	-1.27198	1.27627	-1.58044	-0.895416	-1.4032	-0.669597	0.549156	0.358636	2.78701	-0.884012	0.72052	-2.56693	-1.50025	2.72983	0.460959	-4.70017	-1.32809	0.685543	-0.570145	3.1156
2.3	2.19938	-7.23641	-10.6216	8.06842	1.39861	-0.271843	-1.09821	1.02582	2.47473	-0.829188	-2.86482	-0.453016	-1.38127	-4.61361	-5.21463	-0.956201	0.175484	-2.20604	-0.616102	4.31996	1.60558	-0.367191	-1.83316	-4.89762	1.47661	-2.94065	0.936467	-0.590387	-0.875094	-1.12642	9.05158	-2.37891	-1.70079	-1.08503	-4.44167	-1.57398	-1.38638	3.12764	1.18887	0.901305	-0.450359	0.59167	0.437671	-6.99609	1.42015	-3.82973	0.507741	1.20698	3.78154
2.4	-3.74346	0.337976	-7.51478	-0.172561	5.61497	1.3245	0.504185	0.349992	-0.113714	-0.476015	1.29562	-3.95824	-0.136297	-7.24354	4.80567	-1.977	0.653787	0.661848	0.0161281	3.40034	-0.893564	1.62727	-5.82723	5.80998	-0.848113	-0.266268	1.7515	9.41957	2.42714	-1.66172	3.63329	9.71663	-1.05443	-2.88589	-4.60958	-2.81795	-1.86647	2.60193	-1.28302	1.89012	-1.12237	1.43666	-0.787901	-5.56689	-0.418189	-2.47228	-5.41354	3.01878	5.25102
2.5	-2.77837	4.19849	-14.3178	0.105882	-4.17227	-0.446905	0.447501	-2.66338	-1.44988	-1.88726	-4.12896	2.36621	6.88972	-3.92235	2.0542	2.26158	0.322336	0.402652	-0.816069	2.98739	-3.10371	3.99254	1.66321	2.981	1.51747	-3.80799	-0.275334	1.76051	2.01481	1.20923	-3.00026	-3.04289	10.2469	-0.949219	-2.60696	-1.55095	-3.72207	2.11871	-1.75298	-2.52958	0.246948	1.16472	-1.62585	0.643894	-2.83529	-0.201562	0.749042	2.38058	3.33231
2.6	-8.36854	3.17231	-10.6112	3.82846	-0.000504597	0.45009	-0.152108	0.366879	-0.616977	1.51467	-4.61865	-2.92205	5.23606	-5.12141	-8.83134	-4.66883	-1.2002	-0.936645	-2.92563	0.147086	0.287708	1.61331	-2.08299	3.39432	3.15362	-2.60454	0.158505	1.19168	4.88215	0.195858	9.14677	-0.346813	1.09776	-1.16733	-6.37001	-1.16594	-1.33919	-1.43808	-4.17086	1.92865	0.32031	-2.70131	-0.208222	-4.9969	-2.97712	0.226384	-0.529046	0.762188	-0.0797696
2.7	-2.71281	-2.06128	-15.8485	-0.150269	-3.71424	-0.408993	0.578325	-1.06552	-1.19227	0.965936	-2.70278	-2.04935	-5.64091	-0.771406	0.13227	3.70491	2.05432	-1.59646	2.25182	-2.33185	0.49798	-0.0768047	-1.58966	5.13896	-1.95365	-0.557042	1.46591	1.21259	4.78281	0.6649	-0.00354207	-0.43566	-0.372905	-1.86028	-5.19896	0.00848557	-2.72299	-0.760315	-0.125442	1.3698	-0.29992	0.223962	-0.461136	-3.25835	3.82881	-2.6697	-1.53656	-0.82502	2.38892
2.8	-6.71037	-1.5134	0.0591074	3.85135	-0.439437	-1.84263	4.01958	1.59341	-0.450875	1.37946	-4.18863	0.494574	8.9051	1.75756	3.14171	1.47344	0.506297	-0.950897	-1.00812	3.7458	1.384	-3.30595	-1.93415	1.00503	-0.633151	-0.777934	3.08662	-0.0579428	-7.72436	-1.30623	2.86479	6.08247	1.53824	-0.034679	-1.48386	1.46756	0.383311	-1.08402	-4.32444	0.782152	3.55903	0.625866	1.48332	-5.09369	3.18207	-2.01749	0.445684	2.75742	3.38012
2.9	0.519684	0.382097	2.2704	-2.52697	-1.7783	-0.457233	-1.38638	-1.51534	0.735831	0.250925	-7.73893	-1.4641	6.56673	-3.61045	-4.49221	-0.0221686	-1.43943	1.66052	-1.93652	-3.82543	0.770022	-0.347748	-2.93222	0.241687	-3.23273	-2.86737	1.81049	2.71943	-3.0104	0.977619	-3.24232	3.08941	3.73289	1.77467	2.24898	6.08684	-2.13784	-2.84598	-2.99539	0.677038	-1.28846	3.45064	-1.25397	-2.2752	-1.53041	0.394479	-0.5485	0.338026	1.12849
3	-1.75174	-1.35657	-5.03673	0.230747	-2.25668	-0.245459	-1.12697	-0.186466	-1.21187	-0.0306459	-3.33675	-5.5865	-1.86589	1.65055	-0.274703	0.960997	0.906495	-0.400191	-0.186858	0.0456829	-1.95598	-3.44129	-1.0763	0.550993	-1.6498	-1.56034	-0.42283	-1.14932	0.827507	1.28945	0.559913	-0.285038	9.68392	0.517944	-5.86556	1.05704	-1.97589	3.69006	0.351378	1.6013	-1.32339	-3.90403	4.20115	-2.87027	-0.918303	0.511559	-1.39459	1.08222	-1.17775
3.1	-2.27166	3.18717	-2.14711	4.28728	0.515794	1.12327	2.09586	0.319885	-1.58167	0.967151	-1.09059	-18.1475	-2.32037	-0.912895	-3.51623	0.450209	-1.18062	1.88179	-1.25592	0.0697858	0.130512	-4.42089	-2.0121	-1.27737	-3.24031	-2.89608	2.25596	-2.5538	-0.903056	0.506508	-1.56558	0.83103	6.13884	-2.56428	0.337181	-0.0181092	1.08502	0.956175	-3.57051	1.26807	0.211529	3.46022	-1.52486	-6.28749	1.9754	-1.67467	2.75142	5.4488	3.9225
3.2	3.09208	-1.42725	-13.8056	-1.45777	1.67028	-1.01322	2.84835	-0.714981	-1.38821	-3.42257	-1.98049	0.848934	-0.219691	-1.82115	-2.21422	-2.36558	-4.23723	-0.806672	-0.361572	-3.65968	3.29249	-0.952936	-2.82143	2.90672	4.52361	0.0305018	-1.6709	3.74126	-4.27463	1.501	-4.72267	2.07194	-3.70641	-0.508062	4.41525	3.02922	-1.03868	3.59148	-0.560554	0.367205	1.38635	2.96411	2.70266	-6.2362	0.323407	2.58555	-2.10062	1.17918	1.5456
3.3	2.53293	-1.48864	-4.7561	-0.159722	-1.95346	-0.988776	0.0882967	-0.255102	0.0140446	-3.97553	0.334722	-0.800953	-0.216427	1.35979	9.34077	0.575791	-0.461976	1.41008	-4.30631	2.25013	0.111181	1.29739	0.115045	-6.24719	2.79176	-4.9814	-1.71665	-1.08717	3.66378	1.25798	-1.54247	-1.94443	4.04564	0.665514	0.881404	1.78758	-1.40681	-0.228943	-1.32145	-1.88264	1.31445	3.76362	1.6645	1.85014	1.37614	3.08564	0.332922	-1.42488	-0.682575
3.4	3.24414	3.6454	-7.53774	-0.824535	1.0603	-1.5703	-3.52693	-0.592857	-0.919096	2.17672	-0.683853	-0.0532182	3.81829	-1.38481	-3.55077	1.52281	-0.923828	-1.08543	0.392192	-0.421496	-1.59102	1.71793	0.10741	7.67016	2.36829	-2.28748	1.02208	-2.96307	1.88272	0.181022	-2.53104	0.21536	-6.2467	-0.702577	6.077	-2.85957	0.67412	4.08847	1.01956	0.965377	2.00244	2.28521	-1.63184	1.94339	0.34797	2.00259	-0.399179	-0.0320561	2.2112
3.5	3.48205	2.89295	-1.76901	-4.28631	4.00403	-1.05119	-3.91031	-0.611337	-0.897656	-0.941018	0.151606	-2.32567	2.81543	3.14055	3.34781	1.57476	-0.523391	-0.491859	-0.470375	4.06026	-0.517358	-2.85251	2.04758	4.53059	2.49619	-0.597731	-1.93523	2.29312	-1.28017	1.71183	2.27132	2.40967	1.2787	0.0256198	-1.2549	0.807572	1.6546	1.60251	-0.667602	1.8756	0.609968	2.42489	2.80066	4.99123	3.28494	0.2707	-0.912978	-0.794823	-1.32182
3.6	4.18009	4.00288	-10.8698	-0.354384	-2.70214	1.18632	-0.0772819	-2.04462	1.13384	-0.556235	1.232	1.82076	1.39687	2.08474	12.6824	-2.02183	-2.7694	-0.837991	1.65667	1.51643	-0.592756	-0.177056	-3.01891	-4.2334	-1.2824	-3.82661	1.15526	2.18381	4.809	-0.419386	-3.92558	4.3102	-1.33566	-2.06163	0.311658	1.47423	0.223946	-0.944167	0.961513	-1.71778	3.05407	1.68326	2.20668	0.218154	-0.0375641	-2.27604	-1.98161	0.491199	2.89792
3.7	7.71279	1.82095	-6.86697	-1.47707	2.30635	-0.774961	0.797469	-1.72728	0.21892	3.53974	3.54712	4.06708	2.2849	0.502259	7.3657	-4.04426	-2.90277	-0.142745	0.157707	-0.96885	-0.0157322	-5.57441	-0.793648	-1.08614	-1.36897	-3.49985	2.99426	3.08397	2.85686	-0.285791	5.0316	-5.46962	-0.666051	-6.12627	1.39839	3.45178	-1.91438	0.429694	-1.04499	2.54522	-1.85484	-1.11376	-0.352378	-0.0786863	1.14359	-2.66339	-2.91998	-0.660166	-3.88424
3.8	-3.04455	-1.10595	8.33153	-6.82974	-2.40514	2.42969	1.1404	-1.88067	-0.593608	1.07339	6.27473	4.21536	-0.0922516	-2.50173	5.3352	-0.829569	-0.653196	1.95434	1.53697	1.11831	-2.49333	-1.29422	4.57885	1.35426	-2.19836	-0.235876	0.597623	2.51685	-2.29219	2.6557	5.84389	-2.83738	-5.43283	-0.216912	0.13252	0.315209	-1.41695	-5.71106	1.36871	-0.23948	1.90893	0.856774	-2.02661	-0.66531	0.543914	1.06945	0.41194	0.436276	1.93338
3.9	3.40292	-0.921799	4.78789	2.91719	7.87304	0.192294	-2.47868	-3.71552	-1.88573	-1.49291	11.8016	-2.16913	4.04382	0.597085	7.71078	-1.86947	-3.73562	0.143961	0.540635	-4.14216	-0.795526	1.46475	2.82515	2.55709	-2.46815	-2.23815	-0.347599	-3.41956	-1.30927	1.0656	0.223289	-0.347679	-1.75319	-0.694184	0.277987	1.3204	-1.69024	-4.47075	5.04103	1.12805	0.723648	0.474029	-0.110503	-0.322819	0.0601984	1.38551	-1.16766	1.30803	-2.61358
4	0.129177	4.45526	6.14333	-3.94513	2.2602	2.30673	-0.385176	-1.85565	-0.219578	0.361089	4.67545	-1.4155	7.19156	-1.07238	11.6919	-1.29194	-0.386286	0.240673	1.16277	-3.8126	-0.640177	0.343529	-2.11746	5.53514	1.03918	1.30659	-1.97497	-4.27936	1.09027	2.42227	2.31432	3.83437	-6.20367	0.541908	-1.85319	-0.391345	0.36429	1.50049	1.3772	2.4447	2.78958	3.28487	1.04902	5.93338	2.18023	2.52357	-0.369347	2.3199	-0.220664
4.1	-4.57459	2.65945	11.4892	-1.48283	-3.24285	0.0022763	-0.60952	-1.93151	2.55183	-0.531756	3.52264	-6.28374	7.81938	2.1742	6.04999	-2.56404	0.637903	1.59159	0.673114	2.50181	-1.33813	1.40265	-4.94558	3.79178	0.0408302	0.434386	1.25567	3.92843	2.82374	1.13897	-0.951376	-0.844452	2.03568	2.17676	0.71683	-3.24666	-1.84703	1.822	0.921719	4.4128	1.87955	4.60237	0.867424	3.06855	0.313064	-0.548078	-4.34861	-2.2956	-1.35421
4.2	-0.460664	-1.07778	7.39175	-1.69355	0.324549	-2.68457	-1.50155	-0.340659	0.834075	-0.614398	5.08592	-1.38671	12.8001	4.09964	1.51538	-1.27795	-1.54179	0.600722	2.68612	1.40724	3.52376	-0.0614209	-2.26252	2.47913	-5.83384	-3.65882	0.205235	1.7733	0.0229091	1.47216	1.18446	-8.62528	-2.19193	0.361906	9.74635	-1.97622	-2.13618	-0.042616	3.14685	0.717475	3.38601	1.93491	-1.12386	1.07926	1.87936	4.97931	-3.46927	2.19172	-2.35002
4.3	-0.67292	5.36902	3.75108	-3.05112	5.87727	-0.734907	0.152332	-0.74298	-2.84823	0.503049	2.72286	-0.745705	7.00094	-0.770554	9.73514	-2.40678	-3.32488	-1.55995	0.443864	1.93641	1.77501	1.48663	-4.92548	0.404295	-1.1719	-2.0766	-0.0153609	7.46061	-9.46619	0.494681	-2.16386	-0.0839548	0.418881	-3.83021	4.82152	-0.505554	0.968332	-2.81162	0.637727	4.60692	2.8804	5.27711	-0.550667	0.207167	2.66806	0.562095	-6.97406	0.834885	-3.99909
4.4	0.845073	-1.4954	11.5718	-1.61281	3.77693	0.325268	-1.20704	-1.0988	-1.48342	-0.728953	1.66652	0.873278	2.20639	-0.00441803	-2.61147	1.58475	-3.80589	1.40146	0.374379	-0.263478	3.37335	-2.22455	-5.02785	-1.34002	-1.57321	-5.69631	0.816468	2.03762	-2.63354	1.93646	-3.90722	0.997948	-1.89755	-1.48655	0.452956	-3.58159	-0.428829	0.57866	2.39913	2.73174	8.76516	0.257734	-1.40959	6.88082	-3.71269	1.13528	-1.48655	1.05954	-4.19025
4.5	-1.13015	-1.40603	11.253	0.483109	0.563963	-1.155	-2.39064	-1.58643	-1.32636	-2.26767	2.23088	-0.632743	7.59111	4.58224	-0.37708	-1.3963	0.581121	-0.320722	-0.814992	-0.31858	4.56549	1.60828	-0.377113	6.40551	-2.80988	-6.16049	-1.04632	1.43942	0.805091	0.808959	6.71757	-2.1654	0.302036	3.01576	0.198637	0.247679	-2.03094	2.39643	0.539047	3.53121	4.00724	-1.23633	3.71685	7.10025	1.24474	2.2185	-2.88212	-2.41303	4.59841
4.6	-9.06856	1.1167	-3.02686	-2.59279	6.57827	0.6859	-0.138551	-1.16801	2.23336	0.356662	5.16605	-3.08154	10.7702	-0.664645	3.66523	-4.41517	0.277806	0.0268076	2.37708	2.65656	-1.25222	-7.87354	-5.48351	-0.922967	0.60832	-2.88342	-0.637222	2.28804	-5.09756	2.02239	2.94546	-3.72606	-2.1332	1.55627	0.236312	2.26354	0.293591	0.172521	1.21379	4.36125	1.37062	1.61269	0.447241	3.33799	-2.69609	1.17919	-1.09633	1.15811	1.7356
4.7	6.57132	-1.83089	7.22794	-1.83986	11.0009	-0.780209	2.30165	-2.10016	0.453163	2.90989	2.47958	-2.26768	7.1131	-2.84046	-8.4166	-8.32747	1.24371	0.614878	4.07023	3.51875	2.62452	-5.94641	-0.0110275	-1.70094	-2.09989	-3.10794	-1.44317	-6.86456	-2.96412	0.333694	-3.69528	0.856627	3.71397	2.47793	-0.375516	-0.248774	1.05401	-4.65759	0.650247	0.464741	3.98199	-0.910537	1.63321	5.70522	-0.000707036	0.0518896	-1.27712	-1.78949	-0.0935568
4.8	-6.79202	1.85646	3.95004	-0.0158892	4.15238	1.18051	-2.01389	1.75272	-0.0547993	3.43576	2.79939	2.79696	4.43542	1.85368	-10.49	0.543626	-5.8904	0.974013	1.328	-3.08127	4.14115	-1.11119	-0.359266	-0.0432889	0.538454	-1.98659	-2.11951	4.91218	1.0292	2.23251	-4.8155	-2.31138	2.86871	-3.66288	1.28885	-0.401562	0.251846	-3.43475	0.836718	1.81342	3.50048	0.402086	-1.06138	6.47338	-2.71975	-0.600296	3.46196	0.632393	-3.10275
4.9	4.18521	2.38129	6.6853	-6.50449	0.498215	-4.0806	0.20916	-1.11221	1.14867	2.07243	7.23745	0.576061	4.22151	-1.91772	-9.85756	-3.62881	-5.52217	-3.57797	0.27197	3.38003	1.44722	-1.8256	-4.95167	-3.4159	2.74013	-3.56605	-0.787433	-2.04551	-3.64604	2.23336	2.58478	2.2834	-0.842559	-3.4206	6.928	0.346869	0.130949	-7.07141	-5.23285	-1.16959	4.94775	2.07745	-1.19436	5.34944	-1.23859	0.413575	0.235683	2.47749	0.184948
5	-1.01228	0.00515586	7.36433	-1.15392	0.738916	0.676879	1.60345	-1.81054	-1.59103	3.36109	7.76285	4.56698	9.51325	-0.227439	-18.209	-0.91488	-3.37359	-0.474254	3.3885	0.0789751	1.22662	-2.57068	1.17513	-3.082	-2.56825	-3.93859	-2.66591	-1.85156	-0.605451	1.87457	1.60243	4.63658	1.02147	-0.0826434	3.04191	1.16719	2.42451	-3.11829	-0.981708	-3.04225	4.79017	3.87676	5.43549	3.56238	-2.72785	0.638466	-2.37042	-3.99344	-2.62696
5.1	1.46316	8.10558	3.68016	18.451	2.24419	1.62792	1.95149	-0.13974	-1.91277	5.03209	8.50746	-0.0200493	6.94237	-0.611034	-17.9157	-2.6501	-2.74231	-4.95096	3.32968	4.60599	2.79652	-2.39378	1.04737	-0.463268	-4.57495	-3.17186	-1.05605	-1.66387	1.5683	1.34962	7.39815	2.60285	6.57888	-0.213399	3.93519	6.33763	2.70672	-0.430767	-6.29236	-1.06825	6.4598	1.07633	-0.890387	1.80277	-0.934246	-0.244224	2.75345	2.17051	2.71701
5.2	4.98555	29.4754	9.62134	23.904	6.02142	2.28183	7.66353	-0.455876	3.22763	7.40877	11.822	7.17826	13.4134	0.72139	-15.87	9.22099	-2.80427	-0.856481	8.20702	2.58928	5.32495	1.44608	5.39124	18.4778	-0.33745	-2.30372	3.18973	11.4254	9.01187	1.02285	15.0266	25.276	29.7068	9.09886	10.4366	2.64308	1.80355	-4.07249	-4.51808	4.22515	9.13349	5.17714	6.8879	5.07309	2.29818	2.24584	4.21391	2.77257	-2.18181
5.3	14.0271	60.113	17.3346	66.6113	12.2288	5.4122	19.4825	1.98386	20.5047	20.0377	18.4867	16.3565	21.1924	8.47406	-21.3619	13.2197	-1.86161	0.600299	15.6876	0.405702	6.81887	14.6166	6.92686	54.1209	3.33713	6.65912	5.12609	14.1865	5.48327	1.56716	15.772	49.2706	78.0213	10.5721	22.8929	-2.00851	0.132093	5.20171	-4.07825	7.95933	15.4497	12.3368	8.35765	11.5174	6.22546	4.21901	1.32885	7.1032	2.61764
5.4	31.2658	84.3196	26.1855	102.084	16.4322	8.56153	34.6052	1.44008	32.7308	32.6766	30.4897	26.9474	30.8282	7.38824	-11.4307	21.5544	2.14539	1.73469	22.0644	18.1145	9.60501	7.72365	16.6984	74.8669	18.6001	4.86476	14.9635	27.4409	9.84856	1.58642	27.4556	57.2186	110.151	18.9705	38.3564	1.34499	6.36226	8.45493	-0.201654	13.4029	21.7297	18.4518	11.6236	14.4988	7.61091	8.06949	6.20369	13.2916	5.43266
5.5	36.3195	96.8376	34.1695	107.939	32.3702	15.6107	50.8046	3.53005	43.2873	48.8233	35.8481	35.6691	36.6679	11.7062	-14.2578	22.4089	3.32515	-6.08233	30.3626	24.5896	16.7632	16.049	24.9513	95.4965	22.5334	7.63567	23.9079	28.0918	12.9254	3.84857	33.4386	71.3972	121.162	21.7419	50.626	-0.0185996	5.78665	15.7749	-1.74378	14.6764	30.0769	17.7815	15.2521	14.9786	7.81451	8.64056	3.22198	21.2289	5.73924
5.6	42.1055	98.5602	39.6016	119.359	41.7356	19.5066	51.0172	4.91997	53.1599	55.7593	46.0203	50.1217	42.9405	14.8769	-27.3009	25.7689	4.74383	5.24507	34.6149	24.0767	9.95525	18.5905	29.2332	117.219	25.3321	15.3479	38.5906	39.4351	9.84284	3.76193	35.5922	81.5064	132.277	25.97	61.1064	8.59053	8.37298	23.289	0.362094	12.6214	36.3194	24.5761	22.2229	18.6699	12.2565	9.97661	8.80675	24.3819	6.38216
5.7	42.7336	108.718	41.5697	123.807	50.7225	26.3043	54.4508	6.01678	61.4193	56.8826	48.4775	50.9757	40.5495	17.9855	-17.6744	28.1386	7.70413	5.50635	32.2344	16.7098	18.9922	26.7619	31.7294	137.007	33.6329	21.2088	47.5966	44.8117	14.8882	5.41221	44.7862	91.4754	140.488	30.5263	76.1622	4.14389	6.79328	22.6691	2.72679	20.1413	44.6335	27.394	21.4562	26.0779	10.6432	8.48388	8.25979	29.562	8.7709
5.8	60.2109	118.825	45.4347	124.781	52.0188	33.2015	68.1263	6.88891	69.8603	58.163	58.8352	60.4107	42.9024	18.2558	-25.8739	31.6236	7.50078	6.12189	34.8118	27.3547	21.1351	37.5258	41.8383	144.985	41.6792	26.3666	51.1402	47.5575	17.8381	6.28617	45.3439	99.1164	153.612	31.264	76.0392	5.22167	9.66317	24.4014	0.047417	21.6892	46.0306	28.1313	20.2832	33.1147	13.1635	10.4072	9.6034	29.2024	7.30934
5.9	60.1436	117.702	39.3046	129.249	49.768	33.0329	69.3455	9.60215	73.4217	67.9429	60.0119	63.2212	46.173	21.6441	-2.42082	32.6882	9.25754	6.50303	35.3449	23.9171	24.0898	30.4516	43.2955	152.85	41.5011	28.9131	54.8115	51.1931	15.8601	6.83183	49.4303	105.932	160.484	33.3601	76.4164	4.72853	12.3179	29.3854	3.06999	23.9472	48.0567	29.6553	24.3488	33.7041	16.1197	10.3051	10.6789	32.1833	7.46349
6	57.5444	124.252	47.4646	129.133	64.9582	40.0366	72.3106	11.2862	82.4704	66.084	67.8206	70.7307	55.0511	25.0696	-12.139	35.7437	10.5752	10.2331	39.2881	27.1263	22.2142	37.48	46.8669	166.842	41.2283	36.8205	61.265	60.2681	20.0919	5.98056	50.8881	110.492	157.942	40.3486	73.8915	4.51058	12.0823	26.1922	4.05438	24.1635	57.7209	28.4914	21.2621	38.7805	15.4057	11.6451	11.3703	37.5348	11.4181
6.1	64.5331	120.376	51.618	133.735	59.0519	43.8487	72.6611	12.5998	85.5161	69.3904	67.6718	77.3839	54.5775	23.6586	-15.0664	32.3578	8.13395	11.4443	42.2765	32.718	24.2644	42.362	49.3997	169.58	45.3009	41.0434	66.2907	66.5984	28.5664	8.7139	39.4736	115.258	156.642	39.5871	86.4446	7.23192	11.2347	30.7368	4.99742	21.7728	57.9519	30.3973	25.4751	46.9212	13.8237	11.1595	10.0478	38.4941	15.5613
6.2	64.9785	132.222	55.0392	134.462	68.3625	45.8226	74.489	12.2689	92.6438	70.1464	70.6233	85.6555	62.4625	27.4758	-18.1453	34.7951	9.95555	14.3504	42.7948	30.0662	20.4355	40.1071	56.2991	185.982	46.7276	40.7492	63.2107	65.1926	34.8648	7.75247	39.9588	120.903	161.063	45.2891	99.1359	3.36216	10.7325	32.9648	4.11561	23.5957	59.692	28.8141	26.1064	47.9829	14.3943	12.6507	11.1736	44.3257	14.8691
6.3	70.8349	130.024	50.9426	136.149	65.3802	46.6727	81.6917	13.1393	94.0953	72.2709	75.9488	90.1286	63.2985	27.928	-14.0945	36.1401	7.39363	14.5784	42.6394	29.2519	23.1089	42.245	50.8226	181.293	48.597	44.5461	70.5248	67.728	33.9198	9.91457	47.5996	113.792	166.383	46.9055	106.967	3.96791	14.2351	32.1269	9.74183	26.126	64.1281	27.9454	23.3329	49.1793	16.4706	12.9106	13.8328	46.5625	16.4411
6.4	76.8457	129.856	53.1393	134.61	67.9338	53.6439	78.829	12.304	100.187	72.3577	77.9283	90.9178	66.267	30.2419	-5.16098	38.3761	10.0433	14.6244	43.279	25.7424	25.0414	45.3227	56.779	187.432	54.1551	52.6031	68.6499	69.6476	31.2127	9.88657	48.0333	124.279	170.829	50.491	112.31	6.20487	13.899	30.6679	6.72358	28.7688	69.9397	35.4714	29.6241	52.0691	17.6327	13.3275	13.5354	47.6182	16.6363
6.5	67.5497	135.539	58.0659	148.55	72.8137	52.839	81.2527	13.9926	98.54	75.9048	82.4717	95.3246	62.6457	30.5352	-3.90591	36.6084	8.46851	13.0953	45.6155	24.874	24.1038	49.3215	57.7341	191.927	53.9823	54.7536	71.2769	72.5194	37.5683	12.1836	46.8475	124.331	169.783	47.7564	115.996	4.18652	16.8158	32.9358	4.80326	32.9743	71.2423	32.4997	32.4129	56.7472	15.3077	15.3166	13.1337	49.9832	18.2788
6.6	70.685	133.622	56.6472	142.409	66.8947	54.6163	82.7737	11.6429	97.7485	80.8501	86.6463	100.285	70.1639	27.3367	4.38274	40.9332	8.45782	17.0958	46.0741	26.2979	22.4257	51.2825	64.5128	196.019	56.9446	56.1679	73.2521	74.9855	34.7523	12.3824	56.804	130.893	171.4	54.8292	102.715	5.25638	15.9295	34.5331	5.15773	29.934	67.4022	38.0352	32.2946	57.1979	15.6989	13.1605	11.6131	49.8084	17.572
6.7	70.8612	137.998	57.5577	138.012	77.9215	55.5691	78.6755	15.0627	104.302	80.0488	85.5121	107.239	64.131	29.2302	-9.23703	44.284	9.78339	16.7457	48.4667	31.3686	24.7436	48.6881	65.0731	194.113	56.7107	62.8458	72.6486	76.9989	36.0775	13.0988	51.3673	137.789	166.144	59.5511	108.146	9.33409	16.8854	34.0334	4.83166	27.6328	70.269	37.1086	33.5415	58.7235	17.0342	14.3931	13.4324	51.8595	20.8114
6.8	84.0538	149.411	58.3241	147.289	77.4673	57.4677	83.376	13.3768	104.053	73.2933	93.8876	102.7	71.8296	28.1048	-10.608	44.4963	12.5705	17.2633	47.4948	28.7539	26.5786	49.1406	65.7984	201.335	58.9893	63.8711	72.9207	77.5495	35.8073	14.4798	52.2302	134.693	169.12	62.4291	109.359	11.6349	18.1634	31.362	5.78524	30.9881	71.1207	38.9181	30.5152	58.8524	15.587	15.3173	9.88453	51.0824	15.9831
6.9	71.5026	145.122	60.4602	141.628	77.0027	59.2273	84.1669	15.6182	106.899	81.703	94.204	109.572	75.697	29.3677	-10.8197	42.914	14.5908	18.2123	47.6562	25.5627	23.7584	52.8475	60.115	201.99	64.2411	70.307	72.7269	72.807	37.759	13.2765	53.7097	134.143	162.761	62.5063	125.541	5.61081	17.3964	33.3837	8.79396	29.3256	72.0469	41.0509	33.5856	56.5781	20.7314	12.083	10.6706	52.1995	15.8816
7	75.907	142.457	59.859	151.449	76.3825	59.6329	83.4398	16.9611	110.993	82.2067	90.8324	113.885	67.2035	33.0258	-11.6472	37.6699	12.1661	19.367	46.2181	30.5066	24.7816	60.5717	68.9343	204.974	66.3933	69.6307	72.4397	81.1547	31.8533	11.5378	49.9844	142.413	170.002	62.1147	125.056	12.1664	20.6976	30.3419	6.03211	30.5166	73.1974	40.11	31.1724	60.8885	20.4142	12.9303	13.1095	54.3368	16.4688
7.1	81.7847	143.567	62.2245	154.659	76.8151	60.1895	80.6736	18.0398	110.525	84.1568	93.7569	118.847	65.257	32.2846	-7.97817	42.0117	13.6824	19.5603	50.5814	30.8551	27.5422	59.9862	69.9053	213.372	63.3751	70.4117	71.2846	88.0713	37.5408	11.6918	50.969	132.841	163.751	66.4622	117.554	9.23694	17.3217	31.4055	9.68003	29.7983	72.9886	37.7946	30.7537	61.0632	19.6237	13.7332	15.0307	54.3189	18.7533
7.2	75.0979	143.15	55.9148	149.614	81.9851	65.1105	84.7478	15.321	112.017	85.4582	90.6221	118.784	79.9887	33.2752	-0.710496	43.6795	12.6543	20.227	48.9237	33.8893	26.9784	59.862	71.0748	212.445	67.6447	71.6095	71.7255	77.2711	40.8602	14.3609	48.4905	134.323	169.869	60.8351	119.258	7.30976	18.3376	34.7044	6.21876	33.0664	73.453	35.6954	34.8697	63.5935	18.6033	14.2025	14.034	55.4913	22.3752
7.3	87.2704	150.283	58.9105	150.774	80.0234	64.8254	84.2874	17.5687	115.675	82.9924	94.935	120.629	93.5017	33.9294	-8.82658	42.4753	11.3922	21.3191	48.3752	31.4124	23.7498	55.8801	70.9571	214.654	63.8189	78.8215	77.5893	85.1421	44.2863	16.5409	48.1909	142.034	170.092	62.4004	123.548	9.85233	20.845	38.0661	7.5214	31.6191	75.2117	42.5913	30.9098	68.8595	22.5373	17.2566	14.6926	59.6648	18.5973
7.4	91.7534	152.221	61.9962	153.208	79.5665	65.207	85.0894	14.8972	115.153	87.7094	94.8888	123.672	76.1331	37.7225	-3.97859	41.8191	10.9094	21.4489	54.0444	31.5132	23.3382	57.1636	74.5771	217.857	71.9527	74.7522	78.1956	82.3527	40.8846	14.8017	47.8658	133.356	174.957	65.285	121.205	12.7931	21.3609	31.6703	7.99141	32.7118	77.7276	37.0091	32.9226	66.679	18.5673	17.0468	14.8107	57.5969	13.6042
7.5	85.6341	139.872	63.8913	153.216	81.9693	67.1963	87.7002	19.1295	114.393	85.3758	93.4005	128.32	73.8107	33.5375	-10.7727	40.5148	11.0805	19.5502	54.9943	25.3462	20.9758	61.3484	75.1414	217.842	68.4338	82.8868	76.8287	81.6147	40.6398	17.4011	48.6546	138.929	171.056	63.8734	124.526	13.4149	22.3677	27.9187	4.4415	28.6318	76.5086	45.423	32.4906	67.2676	23.7489	15.1315	15.7552	59.1912	20.0391
7.6	95.0667	146.089	63.2399	145.377	77.5017	68.9953	88.0536	18.5103	120.087	84.5187	98.0456	124.483	83.3879	34.1418	7.33403	43.9918	13.9048	21.1801	47.951	28.8003	24.081	61.2159	69.6161	222.227	70.75	79.4201	78.6867	84.4199	45.3532	15.3965	54.6536	136.474	165.01	65.4751	137.099	10.2901	24.2291	37.9132	3.55994	34.3552	76.5982	42.2661	28.4113	66.9386	18.4493	14.9453	13.3897	56.7539	17.7415
7.7	84.328	147.903	53.43	159.005	86.8256	69	90.6207	19.1711	118.638	83.6969	100.173	130.25	82.631	30.9431	3.0693	40.8253	11.022	21.7848	52.7215	30.7461	24.4528	64.2999	70.2044	226.469	66.2154	86.3639	75.7915	88.2044	47.593	16.6429	40.6378	142.427	165.035	72.2794	127.769	13.0095	22.4531	31.0393	7.40835	34.3856	80.3086	40.7529	33.7554	68.7428	14.7584	11.6687	13.6513	57.5315	22.2193
7.8	87.2166	151.297	63.77	145.32	83.4889	69.8001	86.3217	17.3284	114.64	82.9678	96.6414	125.553	84.0201	34.3143	0.0563534	44.7705	9.15788	21.5472	49.5038	29.987	27.2028	62.6525	74.4191	218.929	73.0066	90.4086	78.9236	88.586	40.4054	15.5597	41.9283	146.115	169.797	70.0668	126.788	12.1179	20.1262	34.0462	9.01031	33.0772	79.8393	44.1885	33.1289	71.527	19.3803	14.35	16.1135	59.2722	18.5662
7.9	102.065	153.695	59.4502	149.258	90.0599	68.5139	89.8576	17.4535	116.619	81.4739	103.482	132.42	83.498	29.468	0.283837	44.8961	10.1166	23.176	50.3865	28.9881	27.9971	63.4918	78.1902	221.47	72.6683	89.8033	76.4226	87.9306	47.4518	15.6792	49.7626	143.243	166.077	68.445	119.878	13.1326	19.3857	29.7444	8.14484	34.0273	78.0315	44.1006	34.3761	75.4368	21.534	12.8288	15.485	60.8778	19.0732
8	89.58	149.024	55.0974	151.595	85.2692	68.8039	88.2251	21.3733	120.534	85.8768	107.168	129.058	94.6718	32.9658	6.85256	43.1435	10.3581	25.4303	50.7234	32.7104	26.9113	65.152	73.269	222.738	73.9457	91.3883	75.8657	89.5978	48.3397	17.4091	39.6753	142.698	170.382	66.7826	121.017	12.5586	22.5133	33.1738	10.3767	31.6834	82.7579	42.4673	35.5307	76.3303	20.4055	12.4735	14.9983	56.949	22.4768
8.1	93.4612	146.922	64.1765	161.103	83.6792	69.9345	89.502	19.3577	123.51	85.9345	103.652	133.231	90.9433	33.9963	5.24941	41.8075	11.1149	26.1167	49.7338	34.4169	27.0576	56.1168	76.6278	215.998	75.735	92.11	76.9388	94.7027	42.0035	18.824	51.4826	141.678	170.056	67.948	120.893	8.48677	23.7415	36.5519	6.86095	30.1362	83.9243	41.5001	27.4597	78.585	18.1591	14.8257	17.8065	60.247	25.1716
8.2	83.5144	154.198	64.361	160.401	85.3152	70.1598	89.5135	21.9696	118.856	81.2533	100.231	130.981	88.1979	35.5325	7.27054	41.0428	11.9027	26.4494	53.0172	29.0715	24.693	66.0517	76.1601	223.509	76.9229	89.5791	78.3989	86.9912	49.7896	14.3484	49.3548	147.43	169.375	64.4183	126.486	10.8224	21.0869	34.9877	8.57788	31.3561	83.0616	44.1597	32.0748	75.7873	23.1358	16.1262	14.9845	60.5582	18.0368
8.3	89.6163	149.624	63.2219	155.751	88.3111	72.8703	88.8575	20.6088	123.121	87.4471	105.438	134.803	85.464	33.761	8.36929	47.1292	10.6938	25.5546	51.1987	32.4916	23.6383	70.5575	77.1955	222.698	72.9372	94.0667	78.1883	93.8518	50.0885	15.7959	52.464	148.177	166.23	65.981	128.575	10.0954	23.3059	33.0804	6.37909	33.233	86.4164	42.0902	32.6879	81.0789	20.258	17.5556	16.5104	62.4331	23.5248
8.4	88.9368	158.114	59.5061	152.632	86.8809	72.7298	95.134	20.9174	120.722	86.768	104.572	134.081	92.0395	37.5887	8.84748	43.4312	11.5931	24.0004	55.9364	30.9374	28.2227	68.3609	79.1671	222.781	80.8122	95.3783	78.1373	85.1737	49.6699	17.4644	49.4995	147.532	171.704	69.9243	118.8	8.22208	21.7943	32.2391	7.75282	31.094	80.2646	46.6276	33.8646	84.0274	18.9316	13.7373	15.3502	59.616	19.6255
8.5	100.857	153.87	51.6477	157.299	86.8311	73.7438	86.7217	20.7303	118.804	85.3636	105.86	133.543	91.6384	36.1519	-3.46261	45.2231	15.5595	25.1499	53.3397	33.0229	23.3106	68.7482	80.4338	228.95	74.4746	94.4865	76.8718	93.4048	51.9353	17.7607	47.0683	149.849	170.541	70.7776	123.714	13.4111	23.1866	33.6046	11.0562	29.3964	86.968	42.7824	34.9555	84.0807	20.3336	17.342	16.1284	58.3025	21.4525
8.6	98.2785	149.655	61.1192	151.965	91.448	72.5989	89.1083	20.1407	121.614	88.4934	108.159	135.771	96.0071	34.9357	-3.06877	43.8437	16.4668	27.1525	49.5528	34.0304	21.3579	71.3588	78.3726	231.618	78.7814	93.0289	80.1	93.3279	50.1833	18.9701	48.5676	141.051	170.631	69.507	131.291	11.1285	23.5476	33.6717	10.0505	31.8315	87.5875	43.5966	36.8489	82.6019	21.1317	16.2172	14.9506	60.0575	19.56
8.7	91.1752	157.743	60.8066	152.354	85.3086	76.6311	93.8848	23.6564	119.773	84.9093	107.579	133.947	91.4902	36.9236	2.32932	46.7484	16.0122	24.9825	56.1688	31.2947	25.2573	65.437	75.718	229.097	79.3536	99.3632	79.2382	94.6005	51.2721	18.1732	45.414	142.813	163.645	66.8257	127.913	11.3569	21.0494	29.7611	9.19251	36.148	84.3185	40.6185	34.7324	84.355	19.1083	18.5392	15.7588	59.206	22.2046
8.8	102.642	152.517	63.7681	154.988	85.3035	76.1772	87.8755	20.7045	121.537	84.429	105.627	133.875	95.8338	39.5974	-0.26571	45.8855	12.4414	24.9932	55.3854	29.3907	26.6174	67.9235	84.5251	228.998	80.5167	98.7629	80.2072	96.3017	51.8643	19.5221	61.9802	146.179	171.961	71.0466	121.151	14.338	26.4592	38.5028	11.5647	31.7734	87.0276	41.1327	31.852	86.2304	18.5454	15.3762	15.953	59.3356	22.098
8.9	104.961	147.427	60.0939	153.83	91.0104	75.5165	86.6478	21.2954	120.927	84.9468	102.848	143.123	89.307	35.5798	8.49978	46.1303	16.2569	25.972	51.28	30.9021	24.9027	66.3719	82.4075	224.831	78.3604	98.3573	74.7133	96.454	58.0993	17.4458	53.3347	147.343	167.249	68.6661	131.136	10.7755	25.5651	32.994	9.65913	30.8937	86.9532	42.3802	37.2989	83.754	21.4294	16.8982	18.1152	59.8443	22.5499
9	101.239	145.25	60.5119	149.925	93.8081	75.2083	95.8084	21.3429	124.605	85.3502	105.783	144.253	91.7385	33.8266	6.09142	47.7848	14.3954	27.7782	53.4683	30.1231	27.356	65.3223	84.85	226.726	76.728	102.392	78.3964	93.0587	46.1993	18.4687	51.1855	143.361	171.94	68.7605	126.891	14.0515	24.3746	35.4962	13.5084	34.8577	87.1958	40.3872	34.4192	87.3927	21.2363	16.7233	15.4997	59.4197	21.6573
9.1	97.838	150.725	59.7395	153.924	87.1425	75.8561	92.0326	22.7849	119.825	87.7302	103.73	139.414	100.521	33.7246	2.86342	42.924	15.2197	24.4331	57.5241	26.918	25.6848	65.5793	82.2459	234.804	77.3865	100.798	79.7475	89.1887	51.4307	20.7826	52.3819	139.295	161.668	70.6774	129.881	9.16289	22.9035	33.3797	7.93299	33.9959	85.971	38.4836	35.7298	89.835	21.3883	15.4818	15.1839	61.2568	23.4512
9.2	94.1905	150.135	65.3597	160.041	86.1411	76.537	90.6089	22.9861	123.061	85.8935	105.397	141.111	91.5057	40.342	7.57641	46.8056	14.7958	26.4018	54.8598	27.1056	25.0879	70.0519	83.2071	232.705	79.6692	102.125	76.4039	95.0555	56.625	20.3275	49.9304	145.204	165.732	72.0229	133.901	9.78612	23.1481	29.964	11.4307	28.3702	87.154	39.5127	38.6809	84.8265	17.6654	14.594	18.7222	61.5142	24.9555
9.3	98.6124	162.562	70.8315	151.471	89.1905	73.6949	92.1922	24.5357	122.483	79.9424	110.809	144.011	88.4033	35.3569	10.183	45.3833	13.2943	26.2477	56.1069	33.8586	27.0233	66.4122	83.5711	233.85	77.7496	99.3232	80.7404	91.8913	57.9064	18.5834	55.3316	140.457	169.006	69.3994	137.155	14.2537	25.1163	30.7765	11.0185	31.5036	93.7642	36.9056	34.3943	88.9332	20.5932	15.0472	16.065	64.5997	24.3697
9.4	100.839	161.305	67.1736	152.267	92.3181	72.4421	88.0669	25.391	119.918	84.276	104.547	140.843	84.0442	33.5009	6.03848	47.0193	15.2969	28.5438	53.1082	32.8623	21.8667	71.6645	78.7288	231.972	78.5294	100.435	80.3959	94.6499	55.8305	19.1414	48.892	141.857	165.865	70.1928	132.911	13.9339	24.336	37.7823	8.53709	33.1959	86.9433	38.2101	33.1192	90.4952	20.5817	15.8328	16.3618	57.1712	18.3502
9.5	101.402	155.373	66.4583	149.186	83.9577	75.5413	90.0894	23.4455	120.926	83.1972	106.939	142.915	92.534	34.4511	10.6649	47.9762	11.7963	25.6195	58.0389	36.4854	23.0071	67.1525	83.9893	229.99	79.0009	104.234	80.5003	86.6733	52.9024	18.5469	46.8764	150.856	165.505	71.5632	136.442	11.3128	23.7241	34.9919	10.1899	27.3555	87.7227	36.453	36.5657	90.1142	22.1578	16.3195	14.7974	61.6557	23.4525
9.6	100.45	153.285	62.8633	150.502	92.5233	71.4466	87.4304	22.7873	120.705	85.816	106.986	136.856	93.4904	39.7763	-0.529468	45.8449	12.8608	26.4569	56.2488	27.891	23.3614	71.8039	81.1479	231.659	82.0507	104.251	75.545	93.3958	49.5454	19.799	48.4997	143.041	164.621	72.7574	137.455	12.6181	26.3038	29.8043	5.71295	32.4733	86.9494	36.535	36.1096	89.615	19.788	18.0803	13.6912	60.5358	23.6674
9.7	100.123	148.75	69.6291	145.956	85.7908	75.8977	89.6818	24.3842	121.993	84.6738	107.477	140.923	91.6712	39.7533	7.60638	49.2256	17.4777	26.1711	55.9447	25.9777	26.3578	70.5275	79.2074	236.031	77.8324	104.77	78.7997	93.6529	56.5761	20.5069	44.5923	144.922	161.693	66.6726	128.221	15.5214	25.72	29.475	9.47945	27.9235	88.2585	40.027	36.8435	90.4583	22.73	16.1251	14.7383	59.0949	25.6965
9.8	105.784	166.55	61.7521	151.744	86.6246	73.4706	89.7002	24.1281	122.44	80.8607	110.542	145.302	94.2405	36.4384	-1.53513	47.5298	15.2388	24.8482	53.7251	26.5074	22.8346	68.9779	79.9686	227.671	74.7743	106.777	76.2183	97.2308	56.1617	19.6218	52.3071	142.468	163.013	67.537	141.854	14.0119	23.9568	33.2176	11.9053	28.7529	87.4826	37.5222	37.3385	91.6964	23.5815	17.9488	14.6526	57.7402	25.3355
9.9	103.114	155.645	68.6849	148.32	91.7576	70.4527	91.9726	23.9564	122.294	81.2079	110.781	141.022	87.1996	38.6882	-3.40135	44.3255	17.9619	26.0505	52.9333	29.8913	25.1171	70.0445	83.5451	230.038	82.3525	107.228	74.8945	97.4694	49.9973	19.6668	33.8521	141.644	161.497	67.726	138.804	12.0732	22.3201	31.0025	9.05957	31.9568	89.588	39.3185	38.4373	96.2422	22.3556	16.4398	16.6339	59.2458	22.9213
10	97.3069	149.355	68.8635	146.61	91.6937	73.0243	90.7939	23.9215	121.485	87.6347	110.442	137.686	88.073	36.2857	12.7475	46.5449	19.0098	28.3983	55.199	27.6665	30.0524	75.0349	85.5425	232.978	78.2682	106.234	78.6396	94.5993	53.828	20.8768	45.3699	143.956	165.299	67.0083	135.754	15.3298	22.6396	34.5258	7.59487	32.8403	81.9807	40.2866	34.5815	94.0274	24.1571	12.7492	11.7999	58.2763	24.1633
10.1	98.5557	156.396	73.0057	149.573	91.6618	69.3719	89.977	25.7296	118.928	85.8977	106.877	137.878	97.7344	35.5654	1.3889	48.5787	16.4733	28.0987	57.2806	29.7995	27.3756	68.7276	82.3472	233.246	78.6168	104.476	74.2122	96.261	52.6294	20.6908	50.5135	143.096	158.854	68.1283	137.205	17.3039	24.626	36.0019	7.12827	28.1778	86.4793	37.1164	38.5035	94.2135	22.2649	15.2895	13.9056	61.4511	26.0176
10.2	93.3336	155.962	66.0911	145.025	86.5933	70.5416	84.5967	23.3253	122.328	84.8226	104.611	136.618	97.1999	36.9797	12.3672	43.1759	17.7614	25.2162	57.8567	33.2951	29.7099	68.5328	81.7492	230.533	81.2654	110.22	80.4579	96.9592	54.5281	21.1034	51.6567	140.97	167.525	71.0479	134.963	15.2455	26.1863	36.2551	8.24079	30.3364	86.111	42.6554	36.5365	94.2503	22.7945	15.5279	13.9876	59.0542	26.1421
10.3	106.224	150.385	65.5646	146.109	85.3509	69.4184	88.8594	23.6949	123.162	86.7505	108.176	139.49	100.839	38.1462	12.0385	45.2708	16.8584	28.2738	52.6038	23.8254	29.646	58.2828	82.0249	232.353	76.4584	107.378	73.9609	102.342	50.7286	19.5903	50.6769	150.788	158.56	66.2446	133.223	14.458	24.2306	32.3547	7.32726	27.3641	93.0015	39.3331	33.903	95.2914	26.628	16.7927	12.6234	61.8589	23.991
10.4	104.676	150.248	67.7191	147.339	84.5142	70.5163	88.4799	24.435	121.238	77.6924	110.917	139.933	92.8845	35.8791	10.1468	49.3163	16.3901	27.8349	53.5258	25.2083	28.92	64.8307	82.5093	234.873	78.1624	104.272	72.8358	94.6588	54.9066	20.991	41.7452	141.768	154.495	70.9973	131.488	13.5758	23.7391	28.8368	10.4334	28.4169	87.6189	41.6728	35.5888	95.3273	22.5281	17.1273	14.1769	57.1842	25.3761
10.5	106.61	153.804	67.371	145.265	87.7481	72.2057	87.9852	24.18	115.881	83.1477	106.685	142.222	94.368	37.7402	15.0464	49.7218	20.0486	25.4397	58.8425	25.2875	29.5756	69.1439	82.082	236.783	79.0723	106.405	76.5637	98.7711	61.9719	19.7408	41.3463	151.535	162.879	70.0469	125.307	12.1347	24.2431	36.2326	9.27577	27.8357	86.6125	38.1723	35.2162	95.984	21.7472	18.4335	14.5833	60.5996	23.9701
10.6	102.458	157.242	67.6922	144.332	90.1285	68.7486	89.362	24.0734	118.697	84.5405	109.351	137.024	88.4137	34.9585	16.9851	42.6895	18.0976	27.2139	54.8289	24.5237	28.7732	64.9417	86.2535	236.651	76.5903	112.234	76.6286	98.9186	56.9771	21.0591	44.8785	143.518	166.689	70.7615	124.57	15.7791	24.1283	32.4424	8.30381	28.6737	84.1977	41.3035	37.1797	98.5261	20.5451	13.8312	14.4948	58.3957	23.5383
10.7	95.2514	156.028	68.3177	146.479	87.8048	69.6871	85.5067	23.9956	118.671	81.442	109.158	137.985	79.7948	34.6351	19.1454	52.3562	16.2855	24.2554	52.8331	29.206	28.3857	68.0181	81.1982	231.53	79.5624	112.789	77.0687	94.6931	58.488	22.0738	46.8657	141.547	156.306	70.9796	127.391	14.5364	25.6401	27.9544	6.13492	30.9178	85.5655	38.0924	36.577	100.712	20.0456	15.6179	15.2887	57.8676	24.6581
10.8	102.266	153.858	68.3685	145.215	92.8277	71.0272	86.1624	25.5747	117.443	78.0353	110.511	141.232	92.914	37.2064	13.5742	45.1183	17.7434	25.9532	54.2598	26.5634	24.4823	60.2928	81.8938	230.959	77.8325	109.613	80.0923	92.6474	55.4997	21.3119	50.1134	137.903	163.786	73.5844	131.656	10.29	25.1104	33.0617	8.7941	28.5889	84.8815	40.4132	35.9979	100.533	22.3719	17.8151	13.9185	58.5646	22.4283
10.9	110.705	154.156	67.3874	144.125	90.8089	68.394	86.7191	24.7289	122.903	83.3407	109.575	140.122	88.9138	36.6954	15.7515	47.9527	18.3948	27.778	58.6061	26.0556	26.0137	64.4446	81.9985	235.028	71.6777	111.122	77.7969	88.1096	62.4799	19.0774	49.9771	141.73	164.887	70.3472	126.451	14.3414	24.7019	30.7406	9.25988	29.302	88.2785	37.7928	35.1284	99.0834	23.0815	15.4649	13.9727	58.5608	23.2527
11	104.743	156.369	69.3491	140.61	82.5027	69.221	86.8579	25.3542	120.381	85.3725	110.452	136.722	86.5746	38.3331	9.14719	47.7366	17.3294	26.7089	53.8644	25.7664	26.0604	63.4247	82.6345	224.027	81.2145	110.769	77.9983	93.0168	66.5468	20.9219	33.2713	142.209	161.216	67.6992	133.439	11.7604	23.2313	33.9235	9.47798	32.1219	82.104	42.4736	31.2941	103.183	19.7021	14.2934	14.2769	60.2965	25.0571
11.1	103.118	154.756	62.5452	138.179	84.2048	67.9046	88.5613	25.0283	120.294	77.4379	110.329	140.835	92.0536	38.6199	9.51221	44.7052	16.0665	26.035	58.5862	29.2765	22.9196	63.9438	82.0457	218.884	75.0177	115.275	73.496	96.7339	61.3106	20.567	35.4936	135.048	161.671	73.7274	127.194	12.2205	21.9788	36.7926	10.7356	29.5071	86.0835	45.8012	35.399	100.983	17.3264	17.509	14.0538	60.9189	24.8767
11.2	96.418	154.229	72.9975	144.128	89.5417	68.4809	88.8042	25.7659	119.648	76.4509	111.572	139.248	89.5734	35.5739	16.9435	48.4463	15.4781	26.3892	55.5554	30.5842	24.5295	64.3137	84.5331	225.974	75.1595	115.729	77.478	91.4823	56.9851	19.8949	45.27	136.313	160.039	71.5356	123.214	13.8491	22.4317	40.5373	8.33787	29.9819	85.7645	42.5996	34.5184	100.698	16.0268	14.884	12.958	57.118	25.1675
11.3	98.0265	157.365	64.351	137.564	90.4963	66.1929	91.2209	26.4055	119.692	78.9457	110.01	135.114	89.5763	37.0194	17.3306	44.5574	15.3681	25.0496	56.1791	30.7542	23.3556	65.1541	81.457	225.035	77.7536	114.874	75.7672	93.7885	53.4543	18.9313	43.5668	135.567	164.428	69.698	138.967	19.402	22.6545	35.088	8.9251	29.1286	84.655	39.2025	35.9705	103.469	20.3121	14.8224	12.8662	57.1192	25.0231
11.4	92.8252	151.002	73.315	138.656	82.0049	67.1168	90.423	24.9748	124.2	79.4446	108.559	140.109	98.891	35.2673	23.6796	44.6574	15.0609	25.9648	52.8059	29.9261	24.8169	70.1032	83.1265	222.704	73.1276	113.957	76.8974	86.9686	48.7126	22.1061	40.4044	143.969	162.142	72.417	132.325	16.1447	22.6662	36.5457	8.7462	29.9823	84.0852	39.0173	35.009	101.86	24.2221	15.3644	13.8378	58.0075	21.168
11.5	110.064	150.614	64.1351	139.558	88.2591	64.7748	92.6933	23.1552	119.354	79.6522	108.694	134.685	85.1586	37.2433	20.2708	44.4326	18.956	26.8009	57.1134	29.0112	22.6815	63.407	81.6841	229.888	79.2366	118.101	75.3637	95.5282	67.7905	22.915	47.4718	142.43	163.453	69.7003	133.938	16.0226	23.2518	38.2057	10.623	28.8161	86.7668	40.1813	36.228	102.612	22.1638	14.5466	12.6913	55.4997	21.8019
11.6	106.044	160.389	72.4763	141.025	86.7475	64.2708	94.7244	26.5041	118.383	79.6647	106.584	140.214	84.7388	34.2068	24.8166	48.907	15.8074	26.2699	55.3226	28.2896	22.6199	73.4736	78.205	222.031	73.7782	117.962	77.1392	90.103	59.7124	23.2818	37.8265	142.97	162.565	71.0189	129.881	13.281	24.5363	36.7577	9.14349	29.0456	84.1911	42.3129	37.0925	100.345	21.607	18.4445	13.1579	58.1066	20.2275
11.7	104.518	147.407	67.7765	143.103	88.6042	64.4323	89.5514	26.1213	118.515	79.1962	108.67	139.95	87.5413	33.8214	8.00828	46.8816	16.8109	27.5941	55.5167	30.8337	24.9827	67.252	76.3271	234.377	74.7893	115.394	75.1865	92.8497	56.483	22.6971	41.2061	144.344	156.358	67.8657	131.942	15.0566	24.9658	31.4841	10.873	32.2453	83.4571	43.7087	36.4362	102.668	22.2282	15.2204	13.7117	56.4511	19.3379
11.8	94.6565	154.094	69.1857	134.769	89.4406	69.4983	87.3978	26.7323	114.362	78.0723	108.737	140.583	97.4492	38.773	8.56879	48.6236	15.4392	27.1547	57.9629	28.9193	19.4226	67.3828	74.48	229.555	73.1743	111.476	76.3901	91.6835	57.5383	20.9857	42.7046	137.278	154.95	65.9953	146.035	13.4739	24.3521	34.0087	12.8365	27.6457	84.5987	43.2099	36.1697	103.476	22.6066	14.7999	14.4963	53.2047	21.0648
11.9	107.878	144.544	61.8919	145.212	92.027	66.3413	85.4945	26.2119	114.444	81.6959	111.266	137.128	89.6292	40.9229	5.51675	49.3208	15.1948	28.2849	51.8741	28.666	22.6755	62.8539	83.0344	218.678	73.7748	114.633	75.2242	82.9278	63.8159	21.0616	41.515	146.558	153.753	64.1853	130.693	14.2867	22.8724	30.1648	6.46496	30.4542	81.8229	40.2249	36.0932	104.058	21.202	15.3527	16.4434	55.9181	19.0592
12	103.215	149.365	68.3996	142.234	84.7402	64.2338	91.2523	25.0096	111.736	80.7492	105.273	137.286	100.888	34.4188	3.8917	49.2794	13.8139	26.3814	55.4758	32.2035	22.7956	62.5334	79.062	224.136	74.0006	115.806	77.166	90.3208	61.6388	22.0886	38.4762	142.94	156.409	68.7639	123.556	12.216	24.8284	33.5255	10.7173	29.4672	85.5911	39.7594	38.2845	102.124	20.2933	17.9512	13.3739	56.6209	20.3951
12.1	103.542	147.308	67.1732	138.996	89.084	65.7588	87.1648	25.3377	117.088	77.5828	107.309	134.119	82.3947	36.2781	4.97579	53.1063	15.8129	29.7375	57.9878	25.5138	18.822	57.3146	80.1735	227.209	74.1348	119.156	74.7845	90.3841	54.9331	21.8866	41.406	132.475	157.773	66.8107	130.937	16.9834	22.9722	30.8078	10.6822	33.7765	83.7598	44.7875	33.3853	103.821	22.3153	18.5856	11.465	60.3329	21.984
12.2	105.816	146.22	61.7733	139.433	89.9088	64.5191	89.2513	26.0833	112.89	77.6775	107.046	142.791	88.3209	33.404	9.91205	50.454	14.3856	28.2443	54.79	29.9856	25.9604	61.2152	76.1984	222.705	75.1147	117.841	74.6833	88.5151	58.5209	22.1809	36.1592	147.368	151.326	65.7433	116.952	11.8578	21.4335	33.3258	8.29259	28.7302	83.4126	41.4029	39.2965	103.557	21.5335	17.5253	13.2329	60.3272	18.3751
12.3	105.399	151.274	64.9109	136.546	87.9975	67.1882	90.2168	28.6236	112.624	78.1509	105.57	135.063	103.403	40.8118	7.90397	46.7681	16.3097	27.181	51.9245	28.4393	21.8645	63.8146	75.8943	220.732	75.3189	113.451	76.9545	90.0606	56.7612	21.7298	39.4581	142.842	152.655	68.9956	115.986	12.495	23.4026	31.5105	11.6913	29.6686	84.9097	36.9306	37.9109	104.543	23.4047	18.4795	14.892	58.4272	18.89
12.4	106.059	145.111	66.529	144.996	92.3602	66.2156	86.1019	26.9832	116.338	76.9976	106.034	133.619	100.768	38.4684	11.0414	45.7111	15.8937	26.1179	54.8394	28.9523	23.8904	67.4103	80.4745	222.752	72.9207	117.506	78.9897	96.6404	62.88	23.0983	40.3767	139.631	149.028	65.1917	123.333	16.247	24.8732	30.4356	9.45941	30.625	82.6379	36.9903	32.6719	105.686	23.606	15.6778	10.6801	58.9924	20.4707
12.5	102.297	152.165	69.777	137.709	88.7465	64.3767	84.27	24.9634	113.777	73.8626	105.781	131.296	93.9833	39.1931	6.60471	49.5434	12.135	25.948	55.5991	27.4445	22.2079	67.0352	77.1471	222.703	76.1745	116.858	74.1236	97.6741	59.9121	22.4824	35.3254	137.105	156.2	63.3048	122.242	9.36091	23.765	38.3124	9.76939	29.7929	85.3212	39.2631	30.5181	104.27	23.4024	16.1463	14.1934	54.6266	20.4745
12.6	108.334	148.64	66.1849	137.559	95.3004	62.3568	88.4892	26.1158	113.654	78.4742	107.315	133.062	105.616	33.8296	11.1699	47.7333	14.5953	28.3312	56.3889	30.1617	21.4448	68.6429	74.261	213.964	73.2647	117.766	73.0177	86.6711	59.4842	23.2797	47.3261	136.412	145.566	62.7837	120.132	15.436	25.2965	39.6767	6.16428	30.3146	86.6872	40.5129	34.9144	102.336	24.6882	15.4717	12.5729	57.6291	20.0114
12.7	102.684	150.492	64.8645	136.537	92.8026	65.4652	92.1195	24.0606	112.801	70.5992	106.024	134.594	99.386	38.4118	16.6362	46.8076	14.5415	28.0876	55.6605	29.6919	19.6887	71.4327	80.0441	217.749	73.6425	116.322	73.7462	86.5714	52.8885	22.5282	38.1265	138.98	151.971	61.9506	126.426	10.2214	23.5025	31.3875	7.97068	28.8562	83.8703	39.1194	35.7967	100.871	18.2243	17.1647	12.1786	57.057	17.6637
12.8	107.242	143.271	59.5221	144.798	99.3864	64.3682	96.0148	26.8843	113.704	74.9233	107.27	131.716	104.265	37.1645	11.7148	46.2707	14.5971	29.3709	57.446	33.7662	19.9826	67.7253	76.942	219.885	73.0599	120.115	75.0994	91.3334	59.1542	23.0101	43.4498	129.35	157.781	59.9595	116.89	7.16231	22.1648	29.1215	5.33399	28.5955	85.9218	35.0494	35.768	100.764	22.3264	16.5892	10.7466	56.9913	17.0747
12.9	99.0683	160.068	62.4836	134.431	90.4027	68.4685	85.6834	26.7466	111.12	75.3043	108.757	126.367	89.4934	35.6662	15.3098	46.6839	16.6743	26.9448	52.3898	34.499	25.0468	65.934	68.4641	218.682	77.0919	122.216	75.7215	95.9762	51.3349	22.8988	32.6693	133.849	151.122	60.745	121.792	10.2158	25.1187	32.2442	7.73529	31.2403	84.8454	37.5619	33.544	101.835	20.1139	17.7032	12.6497	57.1671	18.1785
13	109.351	148.103	64.0876	147.136	85.2927	66.6767	87.6068	25.8816	111.189	75.3486	106.596	135.375	87.8487	37.4271	12.386	50.1281	15.5124	26.3473	59.1134	25.709	21.3825	63.172	78.5913	227.639	71.8116	116.869	77.0186	94.1317	60.5516	23.8328	43.3418	136.347	158.568	59.4343	126.228	13.3466	25.2755	33.2903	8.03208	30.9295	86.5143	40.0499	36.1763	105.389	23.5806	17.4938	12.6044	54.3899	18.7945
13.1	103.401	152.847	62.8927	135.983	82.1907	64.5533	84.4276	24.9327	106.093	77.1701	109.929	131.023	85.0351	36.1314	9.44877	47.2277	19.1913	28.7857	54.9761	28.8566	24.3862	63.086	76.9709	216.091	71.3415	118.09	73.8345	95.3223	54.7613	23.3358	41.4522	136.301	147.774	58.4514	128.32	13.1072	22.4598	36.4231	8.16908	29.1658	80.8876	35.5671	35.9697	105.167	24.892	16.5717	11.6448	60.5067	22.1432
13.2	102.303	146.857	58.5056	141.935	89.7559	66.0693	82.322	26.1773	106.08	77.759	103.758	132.247	85.0643	34.9909	10.3729	48.7016	19.3174	27.6444	53.8586	33.8345	23.6031	61.6076	78.6687	222.481	72.0593	117.576	78.602	92.0782	60.2741	24.3106	49.7036	139.168	146.92	61.3046	127.3	12.5716	26.5063	30.9831	8.35871	29.1424	82.5579	34.7516	37.7393	101.979	18.7523	13.6108	13.826	53.7155	22.0954
13.3	106.153	148.735	58.2462	139.453	88.0867	64.7972	86.2338	25.0521	109.518	74.8014	107.826	129.516	87.5268	36.1977	7.56679	48.2625	13.2653	26.808	59.4193	35.9403	22.8599	62.0456	75.6216	220.934	73.3766	120.535	79.1062	87.5573	64.6315	22.7423	50.0193	132.747	150.253	59.7089	124.615	14.1246	22.8024	26.3048	5.80745	31.1371	83.6421	37.6106	35.6667	102.679	19.1844	16.8098	10.5643	55.086	21.9668
13.4	101.705	148.552	58.2542	136.99	87.6273	65.8322	83.6971	21.9907	109.731	77.2224	104.034	130.259	81.8632	35.9425	10.5962	48.3191	10.701	29.7834	55.28	29.3054	26.0149	66.6926	72.9457	216.289	74.3289	116.469	77.4463	89.9115	62.1736	20.8975	62.3827	135.126	146.451	61.2396	118.365	16.3131	24.04	30.6491	7.17717	28.3655	85.9758	32.1462	36.2536	103.005	22.2481	17.3114	13.3539	56.2024	25.9958
13.5	108.869	143.751	61.4527	136.376	88.2766	64.2257	85.9073	25.964	107.742	75.7506	106.953	132.562	87.4178	37.0602	12.7754	49.0022	14.3629	26.4976	56.5784	34.3186	23.8245	68.3192	72.9893	219.822	74.5177	119.351	76.9118	87.3331	63.3291	21.8844	52.2502	132.676	155.311	62.0507	132.69	13.644	23.3263	35.8334	8.27533	28.9699	81.8752	23.064	33.2914	104.62	18.5095	14.67	13.6333	53.6168	25.9641
13.6	97.1492	150.008	57.7325	137.332	91.5969	62.684	84.4114	24.8462	107.764	72.8312	102.842	128.112	88.7407	31.3562	8.15214	51.0271	15.1795	25.6743	60.5696	31.5132	20.5589	74.8458	69.0368	212.726	74.6035	118.484	73.6727	89.0323	55.007	22.5221	52.7558	128.725	151.17	58.6624	128.716	13.9675	26.6118	34.5409	5.99873	32.8592	84.3632	27.8683	34.7317	104.179	19.2743	15.7404	13.1612	58.0787	23.5628
13.7	98.8106	144.914	57.8891	133.359	90.2558	63.7236	83.183	24.1327	106.016	75.7558	103.921	132.917	82.8322	34.2758	8.3857	48.3349	11.6422	24.9641	54.9575	33.3166	20.1081	70.7675	70.5684	218.114	75.2505	115.965	73.4801	88.5131	56.221	21.0608	68.9699	129.496	150.731	60.0245	123.935	14.5213	25.4942	31.2651	9.11764	29.5488	79.9919	34.1324	33.7538	106.893	17.4698	15.7544	13.6911	56.307	22.6796
13.8	100.55	144.703	58.8786	133.012	87.0408	62.959	80.6048	24.5546	108.722	73.4797	106.517	129.685	82.815	35.303	10.4641	45.0225	12.1165	27.2211	56.5272	28.7826	22.5139	70.1197	72.7043	214.931	72.404	116.903	75.4359	89.6997	63.7269	22.6952	62.786	129.83	156.565	59.1062	121.996	12.6606	24.6473	32.5623	6.85342	26.2984	84.241	29.39	36.1701	105.159	20.6502	14.8677	11.3798	58.0395	21.7563
13.9	97.4946	150.028	63.9911	132.037	87.3043	67.2233	80.1254	23.6922	109.453	75.2222	99.5036	133.931	88.2379	30.9115	5.00216	45.8181	11.1971	24.0353	58.5227	28.8477	20.695	63.4969	70.4812	213.764	69.6409	118.539	75.4176	83.0066	64.6502	21.2564	54.4754	122.26	151.689	62.8919	122.735	12.597	24.0901	31.1999	8.05047	28.4049	83.2521	30.0684	35.5863	102.622	24.7362	17.095	11.3596	58.1413	19.8425
14	98.4566	143.895	64.9724	131.508	85.6116	65.3747	83.2542	25.4168	109.122	72.9753	102.842	135.043	82.7166	32.516	3.14643	44.3954	11.8109	27.5594	58.6879	30.9628	22.6235	65.5582	66.6311	216.359	78.1748	119.024	75.9665	92.0537	61.7953	22.7555	55.1322	126.065	150.966	61.1773	128.399	11.7427	23.021	34.7865	12.3746	28.0222	84.7067	26.5728	37.3729	104.311	23.7042	14.5605	10.9073	55.701	24.5897
14.1	98.5805	149.43	53.4255	136.355	82.7869	66.4847	84.156	25.1873	107.698	71.9771	103.39	128.865	84.3519	31.6789	14.2597	45.6602	10.7818	27.0635	55.9067	26.3904	21.6124	68.8284	71.1476	213.988	69.8654	115.635	74.8762	87.1067	63.178	22.2046	53.2635	130.052	151.811	61.0941	118.334	12.6651	22.2952	34.3238	9.78603	29.9648	85.1169	23.3812	33.2127	105.789	19.9877	15.9496	10.9427	52.4787	22.1027
14.2	98.2885	152.353	60.965	135.493	84.5594	68.8763	80.6375	26.8739	106.702	73.9734	106.883	138.301	82.6418	31.0951	17.1506	50.3599	9.91925	24.4382	51.8078	25.8972	20.1378	68.8272	71.6138	213.583	73.3434	117.477	72.9711	91.7085	59.8228	24.2034	55.0693	128.388	144.946	58.6949	122.586	13.2302	19.2816	29.644	8.5053	26.7293	84.2427	27.2069	36.4282	105.841	18.9797	14.2391	11.1519	53.9892	22.8216
14.3	99.8242	145.968	63.0258	133.858	89.0205	63.9655	84.6915	25.9275	108.565	69.0673	105.223	131.939	92.8145	34.6421	21.4641	47.5458	8.8386	22.4911	58.0714	22.4929	22.8898	64.8101	67.5899	216.616	75.0342	119.993	73.1443	83.1801	60.9521	21.7357	48.7	132.139	146.731	56.6847	129.342	14.7674	24.3721	30.9384	9.05511	30.8779	81.8504	21.7718	37.6437	104.174	20.5161	15.7232	11.3534	52.8962	20.6485
14.4	101.669	148.177	67.9388	128.194	86.1172	66.6712	81.3996	22.504	103.654	71.3511	102.63	134.994	92.8222	31.3751	16.5779	43.3899	4.55156	25.8928	58.9229	26.9409	24.1369	65.6016	69.5998	212.903	72.2017	120.042	71.4567	85.4783	60.2353	22.5417	59.4489	124.215	144.679	57.6223	119.022	12.2573	23.1538	32.2809	11.1738	28.0303	78.7586	32.1662	35.533	106.027	17.7638	16.1053	12.6122	51.7385	25.6323
14.5	101.105	145.628	63.6849	130.211	85.9713	65.4677	88.3345	24.3666	106.265	68.8511	105.661	131.544	87.4499	34.4775	24.7576	47.0769	3.36817	24.7584	53.9363	25.2107	22.5155	63.4849	69.9307	220.601	74.0603	119.576	70.5944	88.235	61.9154	21.6205	59.7355	131.05	142.676	56.1882	119.064	11.0196	23.9026	29.0293	12.0387	27.774	79.1191	30.8441	36.5336	104.511	20.9519	16.2473	14.0507	57.5064	25.7481
14.6	92.202	145.645	62.349	129.528	88.1522	64.8104	85.7065	24.784	105.26	71.5151	104.747	130.806	82.3179	34.8769	22.5527	48.2763	0.973162	26.7227	54.1478	25.999	20.8601	59.4227	71.7523	206.466	67.9716	115.879	71.8537	86.6242	66.0234	21.597	52.1468	132.594	139.702	59.7003	128.14	11.0184	21.3204	27.3341	12.2486	27.3984	80.8413	27.5033	33.3134	106.075	24.0328	14.0032	12.8394	53.2244	24.2993
14.7	103.071	145.774	56.7809	132.854	89.7908	63.7082	79.2681	25.4021	102.68	70.4985	101.576	137.892	97.1016	35.3028	19.5078	51.5894	6.44926	25.5746	52.7132	27.833	22.9588	62.0579	69.3315	208.702	70.9621	117.856	74.4665	83.2086	65.4555	20.9124	50.3525	126.337	144.632	57.1275	117.919	15.7635	21.3025	27.6524	8.67501	24.6272	80.538	31.0797	34.4469	101.572	15.3226	15.2721	11.8194	54.0481	24.601
14.8	98.7489	143.254	57.8518	136.951	92.2178	66.1344	80.1682	27.772	103.36	65.8001	104.347	133.713	88.699	35.9973	13.4162	47.5085	4.27115	28.4841	55.9437	25.2455	24.6956	62.1801	70.0276	210.002	72.8391	120.133	76.2281	83.9217	64.4847	22.407	43.5732	134.136	148.382	59.9052	109.34	11.8319	22.7398	26.5653	10.3449	27.0107	81.1612	27.9145	34.2869	105.152	21.2643	13.4237	11.1891	57.0675	24.2107
14.9	102.951	148.272	54.2845	129.475	88.9629	64.7598	82.5063	24.5085	101.775	67.2885	99.1481	127.908	85.0251	38.8935	18.5251	49.3379	4.83179	23.2646	50.8395	24.5657	22.5218	59.9727	71.6222	207.804	74.125	116.772	73.1451	83.3482	62.4024	23.3077	41.1221	132.495	146.614	58.5321	117.209	13.9871	22.3428	30.1662	8.80487	24.0787	83.4627	31.2739	38.4581	103.718	19.1916	16.5063	12.839	56.4908	23.7588
15	99.5977	144.572	53.674	135.847	86.0597	65.6389	81.8389	26.0022	104.19	68.8219	101.578	127.47	82.7984	35.8568	13.9596	50.2109	4.99575	26.4381	54.4926	26.218	23.6217	63.3079	68.1471	206.587	73.916	118.431	72.6816	87.3431	68.8002	20.3946	38.4512	120.967	147.328	56.3265	111.367	13.4218	23.0144	30.4552	9.56613	27.9513	79.8661	29.7918	37.3782	107.894	15.6659	15.8229	9.65481	51.2407	23.8466
15.1	98.7794	148.108	58.3356	130.118	88.8643	67.7045	82.3046	26.0764	104.563	70.2064	101.562	127.396	81.154	38.3434	9.21662	51.2214	4.87385	26.8388	57.089	25.9969	24.0225	58.6911	67.2535	204.818	72.4047	116.91	70.3031	84.268	62.2574	23.1006	47.8901	128.064	142.192	60.3436	116.075	16.8021	26.0441	30.8251	6.48383	23.7775	81.9123	33.2576	33.8011	100.807	17.9373	15.7633	11.9978	54.9612	24.4522
15.2	92.3542	142.738	56.0905	129.79	89.8505	65.6949	81.5375	22.6152	100.452	67.4386	99.4548	136.859	87.5771	31.8135	18.9609	50.5469	4.94603	27.1303	57.086	25.5622	23.2681	61.6451	67.3154	204.14	71.4241	114.849	70.9404	87.6045	64.9667	22.982	36.7896	130.713	145.55	59.2554	123.821	13.4731	22.7699	34.7661	9.45742	24.7191	78.7192	34.1061	32.4826	105.474	21.8897	15.8757	14.3241	53.3599	28.0324
15.3	96.5085	147.493	53.2396	131.378	84.184	66.4678	78.9415	22.7747	103.919	71.4455	102.258	123.351	81.5157	34.1214	18.1785	47.5708	7.2207	24.9989	58.1801	24.5534	22.8275	64.7308	65.0479	203.604	67.8495	121.129	74.6569	81.794	63.992	20.7434	42.0962	124.897	138.19	59.8832	117.588	9.09668	26.2753	28.538	5.37534	25.8333	81.0374	34.6485	35.5596	105.472	21.1611	15.0684	11.3591	54.0933	22.0003
15.4	98.2804	143.962	54.1805	118.764	89.0886	66.1444	83.6616	24.0242	99.6438	71.5057	95.1309	129.445	85.8482	30.7333	15.627	47.8727	6.87244	28.6344	56.9212	25.2945	23.7964	63.7987	67.6412	203.272	66.7423	118.359	72.3404	82.0619	60.9707	20.3961	52.658	128.056	136.757	52.9881	124.842	14.0187	21.0246	30.6919	9.34624	26.8009	77.502	28.4575	33.2704	102.782	21.9304	15.3071	12.6929	53.3087	23.8052
15.5	101.275	139.565	57.5138	127.45	83.2651	65.6508	80.3611	22.0033	101.033	66.926	95.1701	128.072	81.7969	32.2779	15.6476	46.6843	1.71566	25.6513	57.1074	15.8552	24.1405	59.7322	62.4394	216.563	71.2278	120.672	71.5045	87.5293	66.8903	22.7302	46.3958	127.699	135.436	55.3932	115.4	14.9904	22.8295	27.9886	7.26778	24.7552	81.1151	29.4209	32.5231	104.657	19.4442	14.1541	14.641	53.5891	22.7411
15.6	102.045	147.041	49.7604	123.135	82.3153	63.9345	80.6068	20.0231	100.335	66.0392	96.1291	127.178	84.135	29.5965	16.0702	43.3158	1.21455	26.8632	54.1259	18.9303	19.5323	63.4893	64.8743	204.143	68.563	115.928	72.928	79.9852	63.5147	21.337	45.5859	131.855	130.356	59.8239	119.441	16.8895	23.0271	25.6034	9.91655	26.5676	81.2955	23.0033	34.4012	105.039	19.9826	16.234	13.5124	53.2903	25.0928
15.7	95.3349	144.955	53.3714	131.447	76.9448	64.9418	80.1376	22.6087	102.196	66.1891	95.7427	125.885	78.3109	34.0114	19.1168	47.0779	1.72226	26.1098	58.358	20.0847	20.9473	54.3898	64.9763	211.528	68.7812	117.968	69.7034	90.9293	59.3052	20.1814	53.3543	123.109	140.267	59.7403	120.781	12.1218	25.0627	32.0385	9.63747	24.4283	76.1597	29.0521	29.8019	101.746	24.5654	12.6205	14.303	55.4527	22.5701
15.8	93.753	146.227	64.5715	120.544	81.9243	64.5302	79.1716	21.4562	100.17	66.0398	97.6129	130.201	75.9871	32.3057	19.9822	45.7614	0.225357	27.2043	52.1704	20.3105	19.8383	58.5745	69.2783	205.416	69.3724	116.237	69.8365	86.1953	59.4401	21.7013	43.6377	119.283	137.144	59.0794	118.202	9.73956	25.4566	30.4453	6.2207	26.7511	82.103	22.7912	31.9441	103.14	19.644	14.3306	11.8397	54.0315	24.3337
15.9	100.052	133.226	61.4076	128.94	88.7496	66.2105	80.991	16.89	98.5459	67.2571	96.7487	126.353	76.41	28.7744	7.83848	48.4744	3.03257	22.8154	53.6358	19.5386	21.185	58.2413	65.4055	195.473	74.589	117.585	71.716	81.6376	62.0193	21.9239	39.1116	121.511	134.657	58.5908	125.794	8.54013	24.49	28.8026	8.35898	24.6258	82.2371	21.3868	34.008	99.6335	17.5794	15.7198	16.8277	51.0713	22.0174
16	95.851	146.112	61.2772	126.207	82.5318	67.0879	80.2688	20.9828	96.1183	69.0503	94.1602	134.835	81.9751	31.139	25.7358	44.3524	0.911905	27.8931	55.4873	23.6998	26.5606	60.1798	58.1782	200.206	71.1313	118.63	68.9745	83.6362	65.387	21.1544	32.0169	123.599	137.122	59.8399	127.459	11.6256	22.5052	29.8315	6.70642	26.3499	80.6337	26.1831	34.205	98.0498	16.8224	16.0095	12.5015	53.0904	26.3919
16.1	93.3245	143.8	58.0435	124.771	87.5638	64.8649	78.4058	19.9502	98.4634	66.7248	95.3454	131.227	77.2937	31.0639	8.47042	44.125	-2.80711	25.5653	56.487	12.9004	22.0041	59.9474	63.9269	201.335	64.8183	119.903	69.8208	78.8291	66.6421	22.0862	42.2081	115.234	134.949	53.779	127.912	14.1875	22.5454	32.0358	7.06897	23.0609	80.3826	27.1224	31.5669	101.45	19.624	16.3203	11.6984	53.2397	23.6808
16.2	94.987	136.869	67.6578	124.167	86.6699	65.0821	81.6431	24.9906	97.5124	67.1873	92.8241	125.776	78.7763	26.3039	12.2051	52.1074	0.0544326	19.8854	52.6758	23.5141	20.2163	62.9786	67.2467	202.235	66.4528	120.179	68.0186	83.2987	65.1666	23.8651	43.0822	123.622	132.825	52.3403	122.326	10.6521	25.8632	31.5724	8.50899	28.3078	77.9236	25.5494	33.4125	100.948	20.9358	16.4844	13.9597	55.3702	24.2053
16.3	99.5173	145.307	62.4736	127.595	84.443	66.1214	81.1545	23.8495	96.2978	68.9415	97.2456	125.409	78.6533	31.1827	16.6185	42.7239	1.40771	26.7437	51.7718	26.3994	21.8026	69.9039	66.0863	200.18	70.0831	123.272	71.6354	87.3243	60.6721	22.1749	30.4192	120.359	131.497	57.7166	124.897	13.4452	25.4463	35.0107	7.44251	25.9854	75.8878	25.1766	30.8009	97.0188	21.1999	11.1329	12.8203	54.6801	24.8903
16.4	90.4276	140.182	62.9725	122.295	82.912	67.0858	82.9158	22.6688	97.0729	66.4452	91.3449	127.686	82.1569	27.6359	17.2488	46.9142	-0.711538	25.6047	51.4932	30.5813	9.95663	63.6756	62.2767	193.298	72.8466	116.605	70.004	85.564	60.5899	22.2014	44.2291	122.859	131.097	54.5545	126.367	16.4583	24.2649	31.7996	7.32513	29.8255	77.3425	26.6347	30.4972	99.2533	18.4161	15.2978	15.2085	50.7376	23.9696
16.5	90.8057	144.341	62.407	123.203	80.0059	66.5989	76.0524	24.7391	98.9664	66.66	91.5279	121.914	79.4033	30.6229	10.8478	47.6554	0.288884	28.0845	51.5297	29.4541	19.4396	66.9408	56.3655	200.408	71.0026	118.053	68.3056	80.1649	61.8785	23.0214	41.664	130.996	133.404	55.9547	125.742	14.9884	25.1617	31.593	8.19155	26.9836	82.0125	25.5806	33.0189	102.903	22.7296	15.241	15.087	54.2549	22.4208
16.6	95.8475	137.85	64.3177	120.54	84.3256	66.3058	77.7967	25.2741	97.3248	65.5648	90.504	128.201	82.2219	30.9101	13.8852	44.7988	0.22962	26.8191	57.1811	29.0285	18.0168	66.8585	59.5643	198.85	68.2407	113.849	69.2942	83.1175	55.8698	20.6981	42.8641	134.873	132.846	53.3872	128.446	14.7824	24.6847	26.4601	7.27685	25.5896	73.8992	27.1394	31.2955	100.461	17.1908	11.935	11.463	56.126	22.0348
16.7	93.6916	145.859	50.4781	120.87	80.4987	66.3603	77.3462	24.3639	101.908	64.7578	96.2504	122.069	82.2101	32.7225	14.8317	45.4612	-0.138562	28.9357	52.4535	30.4555	20.1895	57.6889	60.294	197.347	68.5782	118.297	68.7597	83.646	60.9283	21.0843	47.2185	125.477	141.308	54.5679	123.054	14.8539	23.6208	25.2794	8.56297	26.1074	75.4263	27.555	33.0055	100.463	18.3889	14.0155	11.5689	56.4956	22.212
16.8	95.8166	146.27	57.0771	114.984	84.462	67.9973	76.1071	23.4721	99.5137	63.1028	93.4922	127.824	83.4531	28.3032	16.343	42.5742	-0.23752	26.4652	54.5558	23.1802	19.0948	64.3232	59.6442	200.366	69.8953	122.584	70.0131	80.658	65.135	20.6127	49.6246	122.541	131.232	53.3559	120.044	16.1129	25.5644	24.6872	5.37053	27.3638	78.005	29.1535	27.1331	100.364	18.954	14.0391	11.2549	53.6623	25.3072
16.9	91.9622	143.159	60.2569	116.384	86.1545	67.0318	77.9115	24.3534	97.777	68.0867	96.3277	121.061	91.414	30.89	15.6932	47.3797	1.98603	27.6914	52.8087	26.1886	19.1944	63.6401	59.6153	203.291	60.0155	118.653	69.0109	80.9267	62.5924	22.8897	42.5218	120.942	127.706	49.3964	121.24	11.6314	21.7411	25.3444	10.2369	27.2068	77.1281	28.2664	29.8074	96.5372	23.3807	15.101	16.0332	54.9608	21.6466
17	96.4676	140.691	59.9677	118.4	86.5973	67.1885	78.9674	21.6435	94.8279	62.7515	94.0139	124.442	73.8172	29.1778	27.6322	45.6815	-0.628762	24.881	56.6333	26.566	16.0329	57.5386	57.8069	196.234	66.0003	119.696	69.8191	73.9264	60.2343	23.0071	39.4102	119.8	131.76	53.6854	102.627	14.0923	23.2387	26.8389	9.01679	27.0369	76.2957	26.705	25.9685	99.8475	20.2981	13.3637	14.4466	54.1315	22.7976
17.1	97.8439	143.707	58.2157	124.55	84.8099	64.6176	77.4081	21.6425	93.8264	64.7394	93.0619	119.874	79.2333	25.3723	19.4852	49.2067	0.255623	22.611	53.5603	25.9868	21.0426	65.1496	57.6003	187.755	66.6404	119.218	69.0465	85.271	63.1414	21.9103	35.2237	125.011	138.367	52.1714	119.662	13.5388	24.8132	21.5178	6.43851	26.2395	77.8313	28.0496	28.4014	100.234	21.7101	11.6375	15.1453	52.5816	19.8787
17.2	101.74	141.204	54.6965	121.78	85.7615	63.82	73.2656	20.6559	94.5765	62.3402	89.9393	121.267	72.0378	30.6276	21.2718	52.5213	-1.19355	24.8883	52.3521	22.6112	16.2309	53.9461	55.8882	197.204	60.7099	120.653	72.3534	78.867	59.495	22.6839	49.0425	124.022	130.108	48.5135	109.654	11.0892	25.3711	28.6107	7.96896	23.1698	78.7339	29.5797	29.6385	98.1997	24.5868	15.2777	12.0291	54.3125	22.0387
17.3	96.739	146.946	56.2607	125.597	82.9915	68.4659	80.2461	21.488	92.3829	64.0066	87.5917	117.878	73.2892	26.0599	21.9564	49.4743	-1.97516	26.1679	55.2924	29.0782	25.7295	64.0945	60.3074	191.547	68.1565	117.368	69.1089	79.8321	54.6517	22.3299	35.0101	125.223	136.22	53.1219	112.035	14.928	24.0018	25.7408	5.10758	23.1918	78.811	31.6415	31.3542	99.0372	19.5777	14.6947	12.0996	51.7636	20.7816
17.4	98.859	149.115	58.8499	119.742	87.401	63.3633	76.4131	19.7238	92.6595	63.8392	92.2447	119.656	64.7567	31.9067	16.3462	45.3137	-1.80584	25.4492	57.3306	31.5654	26.0304	65.6401	59.7093	187.243	70.1743	121.919	69.8996	81.3785	60.221	22.0173	39.9794	115.181	124.945	50.7508	113.333	17.869	24.5367	29.7872	8.76456	23.7083	76.0026	32.613	33.8684	100.267	17.5206	15.8668	11.1541	59.0095	21.3613
17.5	95.3041	138.513	58.1054	120.857	83.5888	65.5728	76.3023	22.0824	89.5857	62.3693	88.9773	125.343	70.971	28.5479	15.9732	44.4699	1.34203	27.423	54.34	31.6519	24.5131	62.6172	58.7865	190.631	64.8992	119.091	67.9482	80.4879	62.0174	22.7977	32.8218	115.771	132.247	51.1192	117.768	15.2227	24.3027	30.0417	6.24367	26.858	77.451	31.3403	28.9837	100.069	19.4039	16.0924	13.0807	54.6396	20.1039
17.6	100.366	148.148	62.5628	120.925	84.2527	64.3302	74.7095	23.7035	95.0683	63.2015	91.8505	120.667	67.9317	29.576	24.2598	43.2261	-4.71261	24.0602	53.8425	24.2345	21.2459	61.6741	54.3179	195.787	65.9057	116.497	68.5521	76.1682	60.1106	22.2505	40.1765	113.549	129.366	52.4168	106.612	9.23745	23.5663	25.2744	9.91065	23.7865	76.3045	33.0729	27.7756	100.481	21.3377	15.3461	11.5193	54.9714	20.741
17.7	96.4155	149.305	55.0703	120.625	79.569	66.856	76.9103	21.5865	89.8509	63.3181	89.1957	114.004	75.3016	29.7336	10.0913	46.6588	-2.90203	26.9351	55.0418	30.4686	21.3087	60.1692	55.9983	190.802	59.4385	117.489	68.6439	76.5078	61.8431	23.8841	42.6602	113.412	126.618	51.9501	114.221	11.9734	26.6249	27.7477	7.6213	27.4853	77.2941	29.2048	31.1438	102.946	18.221	12.3966	13.499	54.4489	20.8261
17.8	94.6076	146.037	52.6244	117.551	81.9239	65.5668	78.3987	19.1633	94.1331	58.2316	88.9148	115.42	71.838	29.4657	11.019	48.1082	-2.15925	26.109	51.2659	26.5903	22.4495	59.5023	54.0109	184.739	61.4194	119.893	67.3035	77.8513	59.5867	22.1471	44.53	119.358	129.669	55.2422	108.214	11.9373	23.592	27.6626	5.98313	25.1398	74.4165	29.2885	26.6176	103.027	17.986	11.2155	11.3922	55.3388	21.8191
17.9	90.4368	143.152	55.9632	120.686	86.0215	63.4815	74.5468	21.7605	90.1931	61.8943	92.2866	119.514	64.7202	27.0595	20.19	46.0203	-0.490749	26.7606	54.8441	21.8266	21.1518	65.8047	56.9121	185.373	60.8823	119.957	67.7143	83.795	57.7687	22.6817	49.6269	116.578	118.594	51.3039	119.641	10.6433	25.6841	25.7715	6.25716	27.4989	80.0608	30.1772	29.613	102.19	18.7886	12.6228	10.2007	54.2704	16.5157
18	97.815	139.167	48.0451	117.383	81.9582	64.5618	74.1823	21.0486	90.3434	55.7863	87.8038	119.11	63.9584	29.9464	10.2971	47.9868	-3.53477	24.1907	56.0437	25.5696	22.4125	64.6321	44.6848	189.708	60.9335	121.766	66.0238	76.4065	62.9128	22.584	44.0062	116.822	125.468	50.0072	113.103	18.3052	24.0897	26.5434	8.31343	27.2536	77.966	34.4468	28.5446	94.8424	19.3254	8.71706	12.978	56.3816	19.8576
18.1	89.8345	143.218	59.1457	116.61	85.2782	66.9023	82.3679	21.9955	90.6367	61.0084	89.3208	119.063	66.7858	29.3873	15.9022	44.2016	6.53638	25.3149	57.7481	27.0001	24.5835	64.9323	53.2887	183.732	60.0236	118.148	64.8519	79.549	60.9784	21.835	28.1486	121.988	128.7	49.376	105.868	13.9251	22.8457	28.9577	9.24848	24.6236	83.5981	31.5063	29.856	96.4096	20.9394	11.7171	10.8085	54.4396	21.8638
18.2	96.5257	143.071	60.1558	113.88	78.9461	64.7739	71.7859	20.7809	94.4248	59.8449	90.5512	122.057	68.5663	27.7714	17.9886	42.4276	-1.86655	26.3653	52.1254	24.0519	23.3568	61.3236	55.425	187.093	63.3649	119.503	69.6319	76.8386	56.4536	23.9113	39.8303	115.645	130.505	50.3559	112.905	13.4742	23.8199	27.6854	9.45411	25.6781	80.5493	31.0497	29.8852	97.4768	23.7904	12.4373	15.086	56.263	20.0462
18.3	93.8545	139.618	44.312	112.391	85.885	63.8132	78.3394	24.3266	93.5971	56.5461	92.3793	121.618	65.2174	29.0575	11.2015	42.9779	1.21867	27.0405	52.4606	25.3698	22.0131	66.9995	48.6565	186.402	62.2817	111.132	68.7618	80.4726	62.1112	23.9026	36.6321	113.267	130.47	51.638	107.744	12.4588	26.5294	30.6163	10.0636	26.7107	81.9374	31.6867	29.4409	100.804	19.3142	14.6167	12.075	54.7166	19.3934
18.4	93.973	140.123	54.6559	112.609	78.961	65.9979	75.6147	20.1269	94.5888	60.7646	89.5571	118.125	63.5891	29.4171	12.9854	45.3235	-1.66036	25.6053	54.1292	25.5197	16.4935	66.4827	52.356	176.723	65.5093	119.15	66.9798	75.1309	58.8815	24.6353	39.815	104.13	128.86	44.908	110.991	12.3774	23.9919	29.355	7.46928	28.2194	79.703	31.9275	32.0154	101.24	18.3345	11.692	15.1993	57.6199	19.3673
18.5	91.2623	144.974	56.2202	113.512	81.0469	62.9109	80.9572	22.5821	89.5699	63.2524	88.9233	120.68	64.2841	29.4178	9.27882	43.8793	-2.2936	26.6101	53.1172	15.2572	17.6905	67.694	49.5775	187.159	60.2603	115.756	63.3612	76.0614	62.7057	22.7683	29.3106	111.057	120.153	50.3656	114.778	11.6182	25.0211	30.5653	8.49506	22.1301	82.207	33.1402	28.6808	96.8754	15.2788	11.9515	15.3004	56.3567	17.8812
18.6	93.6684	141.027	56.3889	119.25	75.2882	64.4239	76.172	21.315	89.0354	62.158	93.4603	117.183	68.7993	29.0708	11.1095	41.6616	0.981041	25.476	53.7216	18.9963	15.5632	64.4128	59.5254	182.86	63.505	116.294	65.5151	79.7997	59.5054	22.4477	17.8642	110.779	130.39	51.0369	103.571	12.5867	27.4402	31.7717	6.78732	24.9226	82.3369	31.2857	28.3763	99.0018	19.4656	11.726	13.8619	55.1261	24.4151
18.7	88.4308	134.394	61.9827	111.58	81.5835	63.5124	72.0951	19.4417	90.4268	56.6094	91.3586	126.29	65.2623	31.247	6.30742	48.702	-2.49662	22.9717	54.5305	20.4728	17.0085	62.0791	50.953	185.205	61.9438	116.207	62.5094	76.4061	60.0534	21.8058	16.5613	112.028	132.783	48.2764	111.957	13.4834	25.6871	31.9263	7.5016	28.8173	77.4112	30.5157	30.3816	98.4007	20.191	12.8343	16.9294	58.3978	24.0501
18.8	91.0348	140.401	58.6904	115.788	82.3012	65.1233	73.3825	21.6683	86.2682	59.2624	89.4651	122.887	63.1297	30.3991	3.86264	43.549	-4.41854	24.366	55.6167	24.5115	20.4562	57.3899	50.4517	182.192	61.4871	118.555	64.9636	76.2962	54.1272	22.0669	13.5565	116.997	124.833	45.0716	107.033	11.2503	24.3306	29.2314	9.15401	24.4512	79.428	28.3345	28.1771	99.5457	20.4905	11.0895	14.1408	53.4458	23.3661
18.9	95.65	143.936	58.0732	109.676	75.5876	62.1106	78.5449	21.3017	84.8428	60.1325	94.0387	118.04	66.0084	33.2458	8.6654	44.385	-2.0648	27.1232	51.8306	25.7409	22.6478	57.9485	49.7325	173.848	61.0884	115.863	63.2897	74.6563	58.6525	20.8759	23.541	118.248	121.438	48.6152	103.189	15.2329	22.3717	33.8192	7.67181	26.5483	83.0795	29.0493	28.9783	96.9925	16.755	9.5361	13.8443	52.4696	23.0115
19	82.7761	144.35	58.7529	114.16	73.4831	64.6286	72.6192	22.8643	89.9359	56.3679	93.2325	120.715	66.6857	30.9079	14.4028	40.4135	-2.31745	23.911	55.0173	23.6093	22.1906	68.7125	42.3412	179.42	59.7332	116.907	65.1398	71.1506	62.2263	22.6916	19.1257	110.7	118.186	46.5867	110.586	15.4027	21.4985	34.2525	5.22979	26.6181	82.4035	29.6654	29.2113	98.3891	22.2958	10.8208	14.8731	55.4428	23.3227
19.1	88.7541	143.03	59.7085	113.678	76.877	63.7458	77.3666	20.7456	87.7659	56.4671	92.7378	117.839	66.6319	34.9198	11.547	39.6418	-0.824467	25.2127	53.6636	26.7456	20.4322	68.3755	46.9781	172.885	59.8516	117.036	63.5582	75.0447	64.7462	25.0668	21.9064	109.528	122.411	49.6457	107.831	19.4233	24.1201	29.2806	3.01626	23.2129	81.8198	29.2902	31.3043	93.3267	17.8092	14.7082	13.7776	58.4338	20.7867
19.2	90.7974	141.644	55.7045	113.675	75.1401	65.505	71.6534	22.5372	86.0268	53.4786	91.7217	115.509	61.8503	30.7786	7.66385	46.8568	0.89849	26.6232	51.3359	23.3307	19.393	58.7361	43.9518	176.518	57.463	116.514	64.9554	75.8337	61.5172	23.7603	23.9892	112.392	121.521	45.5178	106.96	14.2258	22.7812	25.469	5.68778	26.3829	81.2436	30.6735	29.4555	91.0149	18.2892	13.2153	17.3738	57.1942	19.4062
19.3	87.8667	146.405	55.8527	112.345	74.4087	62.642	75.3852	21.3137	85.3543	55.699	88.5517	110.465	64.7081	32.4782	12.3792	50.3296	-1.2965	23.9391	50.5725	24.575	21.6811	57.7318	49.756	177.569	60.0603	117.652	63.5981	70.8442	53.8166	22.6662	25.6739	110.928	119.522	48.6782	105.586	15.0715	22.4516	24.0484	5.65312	27.5549	75.056	28.4601	28.3419	96.4209	16.5718	8.58445	14.8855	55.0177	22.0673
19.4	91.0623	143.416	56.2709	118.625	78.3615	66.6303	71.1846	18.9992	86.1434	56.5523	92.0453	113.469	65.8187	32.6312	18.6055	42.5574	-1.76635	23.5344	54.1837	18.9086	22.9261	62.2508	45.4339	168.525	58.235	116.077	63.1603	64.9008	53.5387	22.2426	18.3096	109.213	118.294	44.4089	112.788	15.9743	23.6398	26.786	4.93421	26.7354	74.3982	29.5547	28.0675	99.3981	22.2806	11.3744	12.9909	54.8771	25.1808
19.5	83.8571	140.563	58.873	112.745	75.2284	63.2586	71.8715	22.3727	86.056	52.342	91.1307	110.836	71.0499	33.5774	11.9087	46.532	-1.92544	23.0574	54.2224	18.962	20.2541	59.8276	44.4276	174.993	57.6116	115.445	62.1754	65.2099	61.8466	19.792	19.906	113.661	112.289	47.3441	107.022	13.7227	22.7605	26.3151	2.67026	27.462	80.7947	31.5005	28.9688	92.7168	16.4774	11.4403	13.3162	59.6139	20.9107
19.6	84.2625	135.225	57.6072	115.369	78.0712	65.8104	69.1468	23.1639	86.1214	57.7351	86.1612	114.918	70.1411	32.3558	23.8809	45.9562	-4.26991	26.1886	54.2536	21.3607	14.8749	69.859	50.9831	167.78	59.4466	117.717	65.8146	65.5043	53.9345	23.3181	27.2868	108.223	115.012	46.6605	104.319	12.2739	23.6939	30.4054	6.1136	23.0964	77.5803	31.9709	28.2551	91.39	17.5977	12.4458	12.7005	57.9715	20.1608
19.7	87.8645	141.101	59.1207	114.34	75.7138	62.0932	65.7928	19.2458	86.583	56.7159	93.0614	113.586	66.0776	29.1417	18.9041	44.2914	0.153669	24.1985	50.5045	22.1177	22.0235	59.9381	49.1396	174.876	60.3551	118.472	63.853	74.3261	56.1947	24.0366	27.2286	104.545	115.535	41.452	103.116	13.5047	25.2071	30.6177	4.87639	25.8691	75.6466	31.1325	30.2053	95.4599	20.3354	12.0387	11.5953	55.9264	23.0194
19.8	87.7908	140.103	58.6654	114.082	81.1935	64.246	66.2835	20.3026	82.5566	54.1014	89.8971	114.121	62.6708	30.0655	13.453	41.2603	-3.99603	22.4026	50.3968	21.5767	20.2109	66.0715	42.2422	168.052	58.4871	116.839	65.2835	73.1322	55.3264	20.5506	26.5137	105.211	116.627	46.8917	104.275	14.7606	24.7386	30.7521	2.8205	26.9433	75.3349	31.0111	31.1676	92.7752	15.6798	9.19221	15.1029	59.1055	20.8514
19.9	85.0289	138.953	59.5874	115.709	76.6966	62.2924	75.7647	18.7146	82.8639	55.5472	86.2467	107.1	59.8089	31.0524	6.1169	43.0613	-1.1459	25.7521	54.3133	20.571	22.9068	67.7491	43.6672	168.503	56.5896	115.174	67.2554	69.5259	49.6361	25.7191	27.9332	105.279	114.85	46.2345	110.073	14.3745	23.537	34.434	5.90382	26.9212	79.0392	31.694	27.6084	96.3281	19.7107	4.85507	14.3772	54.239	21.531
20	86.7735	131.924	56.4455	108.489	78.6617	65.4998	74.5691	20.1849	83.6922	55.2618	88.9544	115.338	59.0919	34.8484	14.5059	43.4538	-4.33985	24.8066	53.4285	22.7985	22.5073	63.5048	46.6456	159.176	56.6391	116.245	60.1951	69.7699	53.6796	20.9337	23.4072	103.837	120.923	48.2048	112.625	16.6006	21.4953	27.35	5.32338	26.0225	81.2538	30.5002	27.5669	92.5955	19.1537	6.35867	14.3349	54.3431	23.1027
20.1	86.0899	139.808	63.451	116.421	73.5856	65.1143	69.2113	18.7991	82.1248	49.186	87.6101	112.477	62.6235	29.7339	4.1709	41.0351	0.108561	22.5562	52.8447	24.8068	23.265	64.3526	46.4646	164.625	56.8627	115.117	63.1144	73.5945	58.6192	21.1379	21.6832	103.307	117.585	42.2901	100.772	10.7402	24.981	29.0121	5.22616	29.3056	76.743	30.3732	29.375	94.9948	20.8138	7.88849	15.1038	54.9223	20.7095
20.2	79.3405	140.075	54.0939	109.764	67.0946	64.5832	67.5794	19.2146	80.9094	56.0074	93.6245	113.416	60.5857	32.8718	16.5041	43.9989	-4.48289	24.0985	50.4343	23.1529	22.3684	58.5676	44.5863	161.251	51.7156	114.214	63.5823	66.7547	61.0099	20.6634	21.5939	105.476	126.001	46.7386	103.361	17.9653	22.7799	27.6969	4.48377	27.8951	73.1681	31.125	32.1903	94.2908	18.9808	8.11918	13.5499	55.8503	20.8763
20.3	83.9254	137.726	50.8137	109.275	75.9879	62.0054	69.7345	19.542	82.597	52.3503	86.5435	111.879	61.6938	28.4622	17.9378	41.3105	-3.80919	24.1219	53.3593	29.6237	20.6514	58.0219	45.3409	162.842	50.1368	114.629	64.1984	70.0831	55.0715	20.309	18.6167	106.978	117.469	44.3061	105.119	13.548	26.1291	27.0417	3.14598	24.0375	77.7988	30.2006	31.5143	94.5982	16.9096	9.79621	13.0923	57.1536	21.1708
20.4	88.5959	140.807	56.1823	112.413	71.0937	63.4361	66.4485	18.7382	82.3081	53.4763	86.8017	116.894	61.2736	28.3527	11.7337	44.1819	-4.56319	23.7275	48.061	29.2494	21.8454	59.1204	49.137	162.521	59.7761	114.88	65.1609	70.8262	57.5147	21.1062	24.3687	108.162	113.257	45.0629	105.889	14.5735	22.6444	21.8895	5.70106	27.0592	78.1885	31.6545	31.1603	94.2383	19.9945	12.2278	10.2587	57.6654	22.3388
20.5	89.751	135.341	58.27	107.724	83.1908	62.8167	69.6932	21.3771	80.5271	53.6057	82.056	108.913	59.203	31.2113	3.14528	43.1349	-6.85453	25.8797	52.1887	27.8737	21.9279	59.7963	42.9375	168.177	54.0712	114.062	65.7424	66.8156	59.072	17.7888	12.4832	108.598	108.988	44.2901	108.555	14.7028	26.1626	27.1961	2.44711	25.5679	77.3613	28.3412	32.2654	95.9035	14.6514	8.53304	14.1512	57.2533	22.6189
20.6	90.827	139.78	57.8879	108.394	77.4758	63.7599	73.2682	18.5767	80.1772	58.405	83.6136	114.784	56.7732	26.3136	13.8789	45.3032	-4.66035	24.4993	50.5534	26.3319	20.0852	59.3072	44.9999	163.885	56.942	114.069	62.8609	72.5768	55.9141	20.2601	20.4542	106.833	111.387	43.922	119.995	12.5646	23.1691	26.6575	1.6395	23.6978	80.8804	26.8405	31.666	98.1152	17.7143	9.84985	13.8045	57.4062	20.0679
20.7	82.0815	143.721	61.525	103.261	76.1491	62.1405	67.5623	15.3899	79.6795	51.0095	88.4134	110.732	57.3281	20.1184	12.1987	41.0332	-5.30064	23.6396	51.0666	29.0619	18.8325	60.4654	42.2696	161.057	54.1445	116.853	61.3835	66.2559	50.3937	22.234	19.0954	100.842	101.771	46.4868	107.279	12.1146	22.6184	25.7853	3.77086	23.2435	77.5038	28.2351	29.2256	94.3155	19.8781	9.64167	14.4767	61.6059	20.0404
20.8	78.747	133.236	56.9168	102.315	73.9816	63.6288	70.5712	17.6805	81.4539	50.0676	88.2302	109.321	55.5302	30.7813	11.521	46.2886	-3.62821	23.7092	48.879	28.398	21.2494	55.7615	42.6732	162.096	52.2248	111.723	61.2381	66.483	52.7527	20.557	19.1362	102.994	110.936	41.8285	105.37	14.0099	23.1441	26.4168	4.77019	27.3571	82.3701	30.3171	28.0951	95.9999	15.7547	8.25728	10.7221	59.8409	19.8917
20.9	82.4241	142.901	55.2054	107.797	75.9704	62.662	68.8152	19.5589	78.1367	46.4175	87.2336	107.365	71.5876	29.2627	10.5353	44.0701	-1.11531	24.9446	53.7043	29.1939	18.6059	58.4486	38.185	166.497	49.6296	116.362	63.5407	68.0473	56.4777	22.0024	18.8486	103.265	107.157	42.2954	100.229	14.6997	22.8971	26.293	5.90866	23.5798	78.1746	25.6965	29.2672	92.4653	22.2109	10.9498	13.1056	60.1743	19.419
21	82.023	139.318	51.3182	103.801	75.4463	62.6583	66.7728	17.9613	78.5868	52.2915	86.2249	105.347	57.5399	27.289	7.45788	45.2332	-3.42015	24.2161	50.8634	30.6149	17.1753	54.0469	43.6156	164.291	47.5115	117.743	60.2065	68.7183	58.1129	21.8645	19.3041	101.645	110.291	43.8246	98.5643	10.8934	20.704	26.9421	5.30193	23.1129	71.5298	25.2069	28.5897	96.7187	22.6613	13.0189	13.0699	55.7712	20.328
21.1	78.6464	138.272	59.0683	103.582	74.3605	63.1047	69.2092	20.02	75.0561	51.3465	85.8418	106.216	60.6447	29.7622	-4.366	48.7391	-3.9581	21.6599	50.535	24.9206	19.6333	60.8421	45.3459	157.712	48.9146	112.445	64.9327	68.9989	57.3768	21.334	17.0741	108.709	113.883	44.1054	95.2224	11.5722	22.2596	24.9651	3.57534	23.4649	77.3803	24.0006	29.8109	96.4251	27.3486	11.3759	12.1384	59.0412	18.114
21.2	85.2203	134.861	57.3385	99.6895	79.8612	63.0104	65.9134	17.7607	77.2039	48.4174	84.7761	112.02	60.0527	30.8931	8.89989	44.1597	-1.27947	24.1667	49.026	26.0515	23.2105	55.5725	42.6583	164.505	50.8507	114.256	60.8304	68.6567	50.0123	20.9578	15.8361	105.452	101.922	40.5822	102.864	12.443	21.9843	25.3037	6.93146	24.1948	78.394	28.2464	29.8007	96.3624	17.4487	11.8057	11.9946	59.5226	20.3357
21.3	80.6433	131.82	61.7412	104.536	68.9953	61.7286	66.362	19.6517	77.8052	52.1877	84.6219	110.264	62.961	25.3076	4.98698	44.1753	-1.0868	21.7992	48.9525	24.5945	20.3002	55.0495	40.6547	160.346	52.0433	114.221	61.9865	63.49	54.8419	19.9195	17.8052	110.403	104.583	46.0845	93.3607	14.7992	22.7829	28.8279	5.79894	22.4527	71.635	26.4028	30.276	97.4692	19.1998	6.78809	14.0519	57.5689	19.6866
21.4	85.1795	134.762	60.1595	102.38	71.9019	59.6108	67.0709	18.5349	78.8472	51.8661	81.609	105.554	59.0181	27.8509	12.0811	46.6105	3.0228	23.1976	52.294	27.3537	21.7299	57.7547	44.706	160.712	53.135	110.984	61.1436	66.4369	51.5599	20.5854	22.3228	105.15	102.764	41.702	100.511	11.1652	23.6356	24.3793	7.01299	21.1412	71.9464	26.7769	28.4868	94.0636	18.5953	11.9922	11.6325	57.2012	21.8785
21.5	75.0729	127.257	59.7601	102.667	76.6584	61.4745	67.2268	18.4665	76.8547	51.7015	81.2194	114.966	55.5302	23.318	5.84081	42.946	-5.50547	21.9141	51.1223	19.4673	21.2811	53.1642	44.135	156.379	47.1879	116.05	61.1285	63.7373	54.5914	21.7379	23.8453	104.194	110.547	40.6712	101.804	12.0476	20.7923	27.1462	4.90398	20.6571	74.0143	24.2226	24.8078	98.1565	21.0696	11.1294	12.1513	60.9755	18.2493
21.6	80.8654	129.298	57.6153	102.295	74.4974	62.6292	72.1125	18.0445	79.7894	51.696	80.2632	115.667	54.0676	28.4066	-0.834974	43.6758	-0.00446288	22.2225	46.3145	26.9742	17.0837	61.7394	40.8743	158.648	52.2166	116.926	61.9418	60.442	51.4044	19.3264	28.9371	95.3452	111.989	43.1904	99.8244	14.7425	27.0123	23.3821	6.72365	20.3913	75.5064	25.5356	28.8476	94.3486	15.8305	12.4753	10.8165	58.8951	21.2524
21.7	78.0188	135.915	56.0829	102.39	67.7399	63.0705	64.2189	18.1353	76.9346	52.487	81.869	110.361	57.2538	30.2902	4.51134	44.8226	0.715982	23.3094	49.4143	28.0644	19.5903	57.3477	41.609	154.305	51.0622	111.853	58.1976	64.386	53.8707	13.7671	22.6441	100.618	106.687	44.3597	91.2926	13.8226	24.2003	27.0933	7.38852	19.5981	74.0002	27.8255	30.5133	94.4	16.8673	9.89481	12.056	59.1517	20.1976
21.8	81.2505	127.394	51.5329	99.1008	73.3418	60.6947	63.8924	19.1078	72.8174	50.3334	84.2021	106.694	57.5123	28.5224	9.99802	43.594	-1.16616	23.2586	53.0875	26.6255	20.2044	56.3679	43.4386	155.112	49.8309	114.37	61.1793	63.2473	54.7806	20.8219	20.4734	102.28	101.463	43.4367	92.8017	16.1916	24.2827	24.0303	5.55814	20.2023	69.759	28.4388	29.9015	100.611	16.7246	7.99599	13.1687	59.5338	21.8674
21.9	78.3172	134.769	55.7017	99.4152	78.2656	58.7024	65.1961	17.73	72.7638	51.6921	81.1054	105.949	57.8283	23.3641	9.06401	48.2995	-5.49839	23.0233	49.7055	28.8994	18.3504	56.155	40.1479	159.182	49.5785	113.369	62.7896	68.3219	54.4002	18.7489	20.6175	104.04	104.945	42.5795	95.7443	14.3413	23.3907	25.0323	3.47457	23.059	74.8012	27.8335	29.7833	99.9391	18.697	9.28259	13.9481	55.0831	20.1111
22	80.9123	141.362	53.8696	96.8299	79.3887	58.9795	68.5502	17.5733	70.1323	51.5728	80.928	107.096	70.8026	23.9124	6.74418	43.124	-1.79923	21.7274	48.2929	21.721	17.9896	56.7685	40.7125	159.423	45.5997	115.458	63.4548	61.3195	51.8138	18.9052	26.0058	98.8743	101.457	43.0969	101.334	15.3697	21.9099	29.4877	8.06962	21.0503	70.918	25.9998	30.0078	97.571	20.1517	10.8763	14.9196	55.8458	19.6286
22.1	83.1265	129.761	59.5986	98.2338	75.6603	59.4254	66.0188	19.6959	71.6137	52.6337	80.692	102.735	56.9428	24.8236	-5.06989	43.656	-2.89123	23.119	50.2311	22.3889	19.0067	59.9226	43.221	150.442	46.4034	115.358	60.2205	68.2334	50.6482	19.2995	26.267	103.559	97.1594	40.373	97.1423	19.5403	24.5319	28.7362	6.28034	22.9844	69.0803	31.6595	27.4359	97.8755	19.5724	8.88951	11.9962	55.7944	17.1023
22.2	80.4386	134.124	60.2008	97.4282	72.5802	60.5512	62.4197	18.2397	76.2007	49.1666	79.1994	99.3602	59.9055	26.0413	-4.06209	46.2541	-3.04514	20.9215	50.798	23.042	19.2794	62.6992	38.5925	153.171	47.3835	112.3	60.2369	64.649	52.8889	17.1988	20.8858	98.6044	100.253	45.7747	98.1188	17.5482	24.7133	32.6471	1.03497	19.97	74.5693	32.6748	28.0658	99.8634	21.9539	9.4679	12.5026	57.1628	22.8988
22.3	79.3861	133.479	55.4964	94.0999	76.991	59.056	62.5114	18.0391	75.4901	52.7991	77.3379	102.052	57.8883	24.1237	13.9834	43.159	-3.34146	22.1385	45.5188	21.483	19.8222	57.5168	39.6946	157.359	52.3724	113.662	59.081	61.7179	56.3425	16.8788	24.7966	105.178	111.75	41.069	101.609	15.7527	24.7257	31.4382	4.8403	20.6355	73.456	26.3917	26.9324	94.5729	18.4126	8.56786	13.5604	57.9083	22.0983
22.4	78.4841	124.18	60.0186	98.2567	74.9612	62.5093	62.2893	17.3733	74.2183	49.8702	80.4704	105.472	62.3226	25.5474	9.92576	46.8261	-2.52726	21.3188	46.8219	25.5082	19.7737	55.1793	37.5002	140.233	44.7601	108.189	60.4071	66.8735	58.0423	22.3295	20.0518	104.035	102.852	40.5783	101.267	14.3348	22.104	30.7622	5.8098	21.9136	71.0472	27.0156	26.0291	95.5198	18.9251	9.54709	12.8726	60.5966	20.5007
22.5	78.2118	124.517	56.6156	103.885	76.3322	61.5455	69.2749	19.9372	73.8195	48.4562	76.9804	110.17	68.5608	26.3353	4.99593	43.6037	-3.30423	22.2911	51.3336	28.7331	21.6109	56.3598	36.0639	152.589	49.6612	111.013	56.1316	67.6237	50.4629	18.4238	20.3699	101.961	103.779	42.5665	90.2004	15.7764	24.1387	26.8773	3.881	20.7574	73.2713	26.066	24.207	96.4424	17.1399	7.95318	13.507	58.3908	19.563
22.6	85.8947	133.668	49.1183	104.598	70.1651	61.1806	61.6119	16.9392	72.3836	49.4185	78.4999	105.404	59.4758	24.6766	10.9631	41.8319	-2.771	22.4937	46.9165	21.6065	19.6014	59.8921	41.4099	157.871	46.6042	107.703	59.7273	68.3866	53.0333	22.062	18.3094	97.1624	98.9815	41.5805	97.7935	15.1416	25.7521	23.3885	3.04148	20.385	74.3701	25.6376	28.2399	96.7017	22.4102	10.769	13.8986	58.6255	19.8657
22.7	76.1907	129.375	57.1915	102.169	66.2729	60.1185	67.5765	18.1716	71.5307	47.6564	78.3836	104.532	57.7256	24.0593	8.2979	42.3712	-2.44251	22.4085	50.1588	19.1996	17.899	57.5917	43.995	148.075	45.6643	113.549	60.2719	61.728	53.1745	19.8	19.5178	102.996	105.807	43.2567	87.3113	16.2549	24.0152	24.3625	-3.02069	20.6353	74.2603	24.6806	29.3482	95.8545	16.6926	11.9502	10.885	58.0277	20.8278
22.8	79.4169	128.46	49.9278	99.2584	70.1227	58.8571	64.4357	19.6291	73.7253	46.0206	79.1802	102.703	65.3372	24.9452	15.508	39.5665	0.939962	21.7551	50.04	29.6403	15.061	60.8969	35.8824	150.237	49.3314	105.172	59.0785	63.6122	55.0552	19.4381	18.2515	106.905	93.5012	40.6176	82.2562	14.4817	23.7359	26.7002	3.7337	20.1439	69.7041	26.4908	26.8798	94.2224	16.7904	9.94299	12.6813	55.2869	20.0553
22.9	77.2718	133.343	50.6063	93.6274	71.9835	56.3534	64.2351	18.9278	72.8536	45.172	81.0413	107.945	55.3802	24.9168	8.27479	40.2624	-5.61158	21.0121	50.523	27.4142	17.8277	59.464	42.7902	146.088	48.9174	109.098	61.4071	67.092	51.2596	17.3751	24.2978	100.227	101.202	36.017	80.709	16.9851	24.0694	24.0713	5.38734	19.8007	66.4425	24.9228	26.452	96.9294	18.3455	10.513	11.9952	57.6563	18.9869
23	72.0894	132.413	52.4213	101.625	69.475	57.6276	59.6445	16.4003	72.8126	44.0406	78.1789	101.579	53.7835	21.6359	18.7414	42.203	-4.5423	21.7106	52.5785	25.3579	17.5899	54.4696	42.2087	147.748	49.4917	109.339	60.814	59.5189	54.8495	17.8166	21.5148	99.0109	98.7135	40.9971	85.8003	16.3291	25.8858	28.2502	2.67712	19.8925	70.8009	23.4227	28.1656	95.1478	18.975	10.1075	14.8936	56.7781	22.0911
23.1	73.2498	135.641	54.3208	100.199	71.9372	57.8206	65.8032	16.7099	71.0712	46.1285	74.5076	101.441	54.5632	26.1073	20.6898	39.6306	-2.71768	21.041	41.8948	22.4798	18.0286	54.4201	36.5064	155.608	47.3649	111.173	59.1903	64.456	50.1985	19.8909	13.9315	99.1842	98.9954	38.1162	76.2106	14.4576	23.7138	23.4593	2.72943	17.2824	69.1683	25.5782	25.8711	97.3048	19.3921	8.42073	11.2319	55.5913	22.3297
23.2	80.3335	132.794	50.0808	94.9005	67.7296	58.0452	63.3247	16.5239	69.3562	52.4244	73.5474	96.5546	50.447	24.6814	12.5688	39.6356	-5.57248	21.3219	44.6432	26.2122	16.2415	59.1845	42.928	145.516	47.7737	111.827	56.5338	64.3019	51.5647	15.6135	21.0327	101.736	96.5717	37.0771	83.6508	16.5353	27.4475	32.5452	1.22367	18.0721	67.1042	29.1823	28.4186	94.8017	16.5857	6.62767	11.3135	53.9332	24.8951
23.3	77.865	131.124	59.6621	95.6378	68.8121	56.801	64.532	19.0948	73.8953	49.2016	78.9022	100.905	58.7945	24.3441	13.7899	42.7643	-1.00204	21.644	48.906	18.7573	19.5974	55.1105	42.3324	144.452	49.1216	110.423	58.993	63.8344	47.2746	20.4432	18.5563	99.5436	94.0917	36.6349	90.9331	17.462	26.7909	23.9654	4.41156	16.5695	66.5809	22.7834	26.022	93.1053	16.8131	11.2265	13.9453	58.6726	25.8016
23.4	76.6873	131.166	50.8525	97.26	68.4303	57.4077	62.5169	16.3643	71.9868	51.5441	76.4943	104.378	54.6203	24.2413	10.9118	45.039	-2.14067	22.4361	46.5806	21.9654	15.4742	58.8544	44.1037	143.225	50.8096	111.781	62.1576	57.4767	50.0953	20.0206	18.4839	99.7416	90.3755	36.5896	81.6364	14.0449	23.992	25.2082	7.19618	17.8774	70.6954	21.4605	27.3012	94.0146	16.991	9.90799	13.8852	54.8188	26.4179
23.5	69.0417	133.131	56.9537	89.1822	67.6254	58.8388	64.9198	18.0019	70.4696	47.9359	71.5518	95.5834	56.8898	24.6376	15.6135	43.2402	-0.710126	21.0428	44.1905	24.6296	17.6263	55.5718	41.3322	150.755	48.6044	109.494	60.1674	60.8	51.1513	19.3558	26.542	95.8327	93.0068	37.0554	85.4855	14.6674	24.6811	23.2641	3.44425	19.6306	66.8594	23.6216	27.888	93.3881	15.6783	11.0473	12.7403	55.2312	23.9007
23.6	69.8208	134.149	57.2346	93.748	69.9837	56.2955	61.341	16.4223	70.9917	43.8486	75.3043	91.2772	52.624	23.459	17.498	41.4873	-4.19803	23.247	47.446	27.7221	18.9374	59.2121	44.4876	142.619	46.642	107.907	60.0886	68.0146	49.1808	15.8684	23.5467	99.7246	94.1043	38.1086	90.5756	12.4893	23.1116	22.957	2.27653	16.2142	63.8939	21.3979	29.3211	95.0332	19.209	10.4294	10.8376	59.0023	22.9477
23.7	76.8343	132.244	52.9497	97.3574	69.8298	60.1719	62.5215	15.8564	70.9699	50.773	74.1205	89.2296	45.7976	25.4083	26.2779	39.649	-0.791422	22.3825	47.1481	26.9804	18.071	54.2338	37.0624	136.791	46.4215	109.578	59.0767	60.2073	54.879	19.3223	22.7971	99.5493	92.5019	35.3246	81.1479	13.6482	24.0431	19.8078	2.37792	19.544	64.999	26.0465	27.369	98.0822	19.4679	8.60582	13.7542	57.1447	22.2767
23.8	73.1204	132.086	55.9534	96.2531	77.8496	55.4901	58.8467	16.5895	66.6316	48.9431	74.2329	99.8839	54.5298	23.0289	27.1569	42.1157	-2.01024	23.0297	45.2927	24.4263	19.6625	57.1415	36.4953	145.641	46.3991	113.793	55.9079	63.2868	52.374	20.4595	22.5706	98.7723	93.5023	32.1099	86.2083	12.9126	23.6314	24.8065	5.10536	16.6595	66.4517	23.1838	27.2289	91.3739	18.3233	10.8453	12.3799	57.9342	24.6525
23.9	76.2447	126.883	54.0089	99.2208	71.6263	55.1928	60.2568	13.3686	69.0571	47.4279	75.9529	96.9622	47.2522	24.5289	25.5303	36.8481	-1.49538	21.9809	46.2139	26.2479	17.7235	60.8708	36.6502	141.67	43.2358	110.452	59.8324	65.8506	52.4016	17.52	20.9077	101.3	104.498	37.0997	83.5555	11.4372	24.3916	17.8292	4.11771	12.0826	68.9342	25.6419	28.9069	91.1673	17.0931	8.85621	14.9888	54.8375	19.0672
24	70.66	128.154	52.9287	90.9324	72.2421	58.8033	62.9999	15.5037	71.0293	49.2348	74.7789	97.4881	37.669	27.2972	24.7867	42.0378	-1.35606	21.6933	47.6946	26.7477	14.0306	54.5085	38.5906	138.296	44.5373	111.504	59.3309	57.1448	59.3842	15.6096	22.7284	93.4274	88.2145	37.0387	92.8352	10.6522	24.2435	25.6459	2.52996	14.1915	62.1806	26.3045	24.7043	94.1381	20.5662	7.56887	12.1945	58.789	24.3883
24.1	63.4992	135.039	51.48	88.3226	71.1784	56.5925	61.9488	14.4843	67.8969	52.1301	75.1103	97.44	47.8495	25.1603	16.3689	40.3558	-1.89014	23.0093	50.6281	29.1217	19.3196	56.5258	32.4493	144.465	47.9318	110.946	56.2537	58.3247	50.9766	17.3999	21.3915	100.732	89.0335	33.4774	100.504	14.9879	24.7726	27.0782	3.10476	15.1238	66.3868	26.1896	26.2537	93.4808	14.9491	8.74519	14.6842	53.8538	18.9283
24.2	77.0301	128.283	45.801	94.172	70.1376	59.5802	60.3162	15.3053	66.4488	43.0443	75.4183	99.2943	48.8481	23.003	25.6598	38.4445	-4.0394	20.5926	47.4069	21.7756	17.8623	54.0018	40.6639	138.686	47.612	107.524	59.9556	62.0624	51.5254	16.3073	22.6807	95.9398	94.9499	32.8468	83.2381	10.8997	25.4759	28.9885	3.14819	15.5702	66.2297	22.588	28.8309	96.3212	16.272	6.74928	14.3152	55.4662	19.3106
24.3	68.4577	130.379	42.918	89.5077	65.8194	55.551	64.5432	15.7399	64.4619	46.7632	75.2543	98.8002	51.6942	22.8776	24.6748	38.0903	-1.31554	20.5442	49.4876	27.3363	17.7063	52.8683	38.6128	142.243	43.5001	107.026	56.605	59.1408	47.3694	19.9467	24.8722	98.5006	90.5668	34.3464	95.2988	9.43382	24.5857	26.9796	2.28441	16.0105	67.9182	23.6931	26.2768	93.9049	17.7576	7.50732	15.3341	53.5596	20.0568
24.4	70.5495	130.278	45.3603	90.8779	73.615	56.3696	59.7873	14.7412	66.1963	51.4116	76.7391	92.9649	45.7795	23.8031	38.0945	38.7569	-1.78583	20.5959	48.2909	24.1893	14.6367	62.278	37.1272	140.31	46.525	109.774	57.3515	62.7422	50.3076	20.3051	12.8281	103.58	88.4794	39.4506	90.2309	10.061	23.2642	28.538	3.12591	14.7108	66.7465	22.9927	27.0752	92.8782	16.7422	8.11781	11.396	55.6533	18.7688
24.5	69.7279	130.777	50.3007	98.842	66.0315	57.9706	59.7903	15.5243	69.4486	50.1581	75.0414	95.5845	44.9419	23.0788	26.3519	39.6929	-3.78417	20.6415	48.7515	22.4118	21.4569	53.7614	33.4873	143.036	49.1071	109.034	57.6524	55.882	50.1847	18.151	24.3187	89.9607	92.3552	33.7324	84.3848	10.4601	22.6179	23.745	4.45476	14.151	64.8894	26.4701	25.9409	91.3514	20.02	7.20701	12.2918	56.9118	19.5854
24.6	76.2816	130.41	49.9362	102.058	67.4757	58.6608	58.3265	15.4074	67.0867	49.3001	76.3271	94.0801	48.8989	23.2071	26.7628	36.6298	-1.18649	19.9685	44.7556	26.0903	19.424	55.6514	33.6754	133.478	42.9808	108.859	54.3435	60.2877	52.4094	18.4855	16.7337	99.594	89.624	34.035	82.3479	11.6492	21.4723	26.1095	3.95438	16.9594	63.7601	22.1746	26.1918	93.1867	17.3706	8.40892	12.6159	56.6457	20.7411
24.7	76.5155	131.949	55.9177	91.7087	67.0444	53.8185	61.7348	16.0699	63.7236	46.6895	77.0465	93.6309	53.6559	20.7036	22.8519	39.8582	-0.418625	21.7949	44.308	16.5512	18.0385	47.9425	35.6744	146.594	45.9587	111.289	55.5965	59.0615	43.2085	18.767	21.4062	88.1326	87.057	37.2174	86.8409	12.0754	23.8921	24.4078	3.74145	16.5334	66.9357	26.6557	26.6416	93.1514	11.3721	6.57378	14.4922	57.9287	21.891
24.8	74.7908	133.389	51.4243	94.4241	66.834	54.9808	57.2692	13.2203	66.3597	42.3226	74.6087	93.9514	43.7955	23.8617	22.923	36.0215	-1.77952	20.703	47.0614	18.2736	9.1109	61.5005	33.6175	138.419	43.5415	111.334	53.6642	59.2058	47.8227	19.1057	18.105	94.5738	91.9095	33.5247	73.1297	15.2276	22.9976	25.0108	5.40847	12.7771	63.9032	27.5551	26.1925	92.3001	8.75523	8.6192	14.9856	55.5893	18.3311
24.9	69.057	131.07	54.2421	89.6242	64.9216	56.978	60.676	14.735	65.9267	41.5364	75.3336	98.952	46.622	26.1173	24.1607	38.8829	0.116994	20.7473	48.9403	16.3727	10.4437	56.3027	29.4818	138.508	42.9798	106.257	53.9235	62.5793	53.5046	17.2147	20.9974	86.8627	85.9638	34.2967	80.9035	15.955	21.6529	23.5903	0.958772	11.7442	62.8289	21.7865	26.9859	94.8141	15.6211	8.75971	10.8678	52.918	19.2568
25	73.1797	127.106	50.8534	86.6592	66.1709	55.7514	62.4258	16.4362	65.2966	44.9631	74.0573	90.9605	42.5812	24.2884	27.7542	36.8131	-1.13483	22.2668	44.749	18.2627	14.7443	61.7261	24.7093	143.734	45.2666	109.402	56.5893	58.0384	47.7999	16.4812	21.8871	91.3648	87.2558	36.8634	88.6112	12.5056	20.7433	22.4442	2.73613	14.7383	64.9372	22.7944	28.7836	91.4021	16.3113	7.37376	15.8021	55.6084	20.9413
25.1	72.4382	130.047	46.0631	87.6832	68.6008	55.8653	59.208	14.5906	65.4116	43.8294	68.1495	91.5542	46.3862	24.0272	15.326	43.2736	-1.41126	21.9023	49.3164	16.8061	14.6507	60.3833	28.2362	137.036	45.5354	108.853	55.2288	58.5285	49.899	18.6913	19.1782	91.7875	89.8455	33.3902	84.7198	14.6548	22.5618	23.5067	3.25019	13.7383	64.8659	23.6502	25.5115	92.4884	15.32	8.04297	14.2237	57.1008	21.2858
25.2	72.7393	129.111	48.0856	95.9757	67.6666	54.9078	58.7979	16.4826	62.8855	45.4641	72.5793	97.7123	44.3666	24.7693	30.533	35.8409	0.724939	21.8029	44.1087	15.7253	17.9407	60.1205	24.5419	131.839	42.0851	108.569	54.0713	54.3434	48.8109	19.0335	20.2671	84.8342	86.1405	34.0645	86.7084	12.879	21.7422	25.614	1.12145	13.3827	62.1286	24.1543	26.8439	88.1126	16.5305	12.1085	9.5979	58.6038	20.5022
25.3	68.4426	131.552	46.6809	90.5796	67.8185	59.2276	59.7846	15.8595	64.8791	42.5718	69.412	92.5881	51.3698	26.8887	32.5129	40.4825	0.141471	24.0166	45.3441	15.4374	11.8943	58.5727	28.0128	135.53	45.7777	108.564	53.8651	54.559	50.2621	17.228	22.0274	80.6483	80.1912	36.0653	85.8829	15.611	23.0691	24.1768	4.36051	14.4276	59.3755	24.8157	28.9141	90.4467	18.6122	11.1941	12.5914	57.8301	19.5836
25.4	65.7277	129.65	53.492	90.5878	65.0523	54.9634	54.7155	15.4888	64.374	45.821	69.1685	85.1969	44.2125	22.7087	29.075	42.1089	-0.824075	19.7564	47.2058	18.5043	16.3773	54.5066	28.8524	141.412	44.804	108.396	53.2516	57.8895	45.0048	18.1274	21.3379	88.035	81.0052	37.1861	92.8122	11.6231	21.8969	24.0853	5.9628	11.1636	60.3162	19.9999	29.2926	95.0723	14.3365	7.32578	14.3696	54.6041	17.1505
25.5	71.863	129.357	47.3941	85.5441	64.1481	55.412	59.019	14.5315	64.2163	43.058	66.9504	89.9234	48.2141	21.5725	31.251	37.002	-0.78863	22.8503	43.0124	21.2605	13.1142	54.094	29.1972	126.099	33.8301	107.57	53.4343	56.8215	47.7926	17.9779	22.4719	86.3615	82.9735	31.5556	87.0457	10.5846	25.9146	25.0856	5.21975	9.65437	61.5857	21.1205	26.0848	91.6494	12.1918	7.84278	14.3112	56.5596	18.7026
25.6	69.5308	126.001	51.1279	85.0738	68.3131	52.359	52.6375	15.5952	62.3028	45.2688	63.4895	85.845	42.8578	25.4985	35.7266	39.8	-1.35867	19.9101	48.2856	21.4646	16.3538	45.9507	27.6823	129.638	41.0043	104.913	54.036	59.2302	48.5564	16.6153	21.6672	89.1883	87.5789	32.7779	84.3657	12.9945	24.1535	22.2099	3.15475	-0.480317	60.5505	21.8611	25.8518	90.6705	11.2636	10.633	14.3901	55.1709	20.9539
25.7	76.8232	130.096	49.1654	92.907	68.3133	54.2427	52.4231	13.747	66.341	42.9391	70.5336	89.3916	40.9545	21.2365	44.7147	41.7766	-2.4765	19.1883	46.9009	24.6244	16.2567	56.8893	24.5892	135.239	43.0602	106.743	54.8275	52.7844	48.9383	17.3969	19.5401	89.049	82.2851	31.452	80	8.90066	19.4601	23.3597	1.89864	9.68507	62.3577	24.2853	28.7183	90.5535	8.58821	9.79613	13.6699	55.8002	17.7081
25.8	69.7626	133.864	54.6544	84.2579	63.6781	54.1059	60.2194	14.7083	60.0438	44.6313	65.3384	93.1906	44.8593	26.066	33.7798	35.9135	-2.28685	18.5985	47.1706	21.4076	18.0161	55.5467	26.0344	138.645	40.3543	108.768	54.6392	54.2934	44.8271	19.2109	17.8606	82.3086	80.1758	33.4891	85.88	12.8514	21.5933	26.7148	4.58051	-6.69506	58.0385	23.0139	25.8898	92.7959	18.5462	9.14202	12.8446	57.4248	17.8927
25.9	69.5814	122.88	47.8941	87.564	65.8724	50.06	55.6962	14.7142	68.097	41.8749	68.1202	86.4769	50.7094	24.6847	30.949	41.2641	-2.32009	19.0703	45.5913	25.5884	14.3978	59.0161	22.8733	131.94	41.3714	103.98	55.0729	59.5945	47.0682	17.799	20.1525	86.0034	85.1958	26.814	81.3059	12.4173	22.1402	14.1736	0.309389	4.98236	55.9463	23.355	26.0062	92.8056	14.1915	9.02257	13.3349	53.6222	18.8472
26	66.3287	132.284	50.3689	89.7943	61.2281	54.9937	59.5973	14.7764	66.429	41.3948	66.4297	87.8125	45.9858	26.0064	35.7236	41.5834	-3.61458	19.967	46.4009	22.265	16.8764	55.7927	23.4479	135.673	39.9207	100.915	53.0854	55.9513	55.6864	17.9528	23.3777	92.3764	85.2489	30.65	93.3328	12.3601	21.1909	22.5693	4.06514	13.1365	56.2871	20.8939	23.8008	92.3962	14.8735	12.5526	13.1743	55.3041	19.4081
26.1	73.5105	129.562	49.7849	88.7765	65.5157	52.9708	57.6661	14.6851	67.4106	41.5813	67.5754	85.9417	46.5242	28.8952	38.8773	41.6944	-2.71561	22.6546	47.376	20.571	16.9291	53.0722	27.4477	132.456	41.3174	101.925	56.1453	56.1736	40.7285	18.1728	28.2875	87.8698	76.8465	33.5017	83.8617	18.665	22.8342	31.6205	4.18484	8.84235	60.7765	18.6106	25.7412	91.2757	14.1885	8.95186	14.4593	51.2381	20.4723
26.2	62.1482	129.026	49.2631	83.744	59.2396	53.8505	55.7279	15.7729	65.5437	47.6551	70.837	88.3722	53.5554	25.5959	48.5931	40.6618	-0.87662	20.1589	46.1826	21.5589	17.5066	57.4305	24.0039	133.861	38.867	103.046	53.2257	52.3194	50.3244	15.7945	27.4615	85.3701	83.0759	30.9432	77.391	13.3057	20.3144	21.8985	3.70603	7.55186	61.091	20.7889	25.1703	89.7157	16.4611	7.85491	11.4938	54.15	18.8888
26.3	70.0663	128.04	51.5754	85.4155	61.3926	53.4387	54.5823	15.5699	62.4796	43.1396	65.0579	84.7502	44.6786	25.4398	48.8663	39.2688	-0.350919	23.1074	45.2226	24.3741	14.7309	48.5222	21.0189	135.62	36.3854	102.325	49.2556	48.5001	47.2672	15.2115	14.8415	83.8983	76.2083	30.3024	91.4095	13.6379	22.3447	22.962	1.58409	12.1811	57.0606	18.9968	24.6602	89.8914	15.0736	10.2222	12.4693	54.8831	18.1579
26.4	71.975	123.45	49.227	87.3339	62.3567	53.7182	53.1375	14.7644	58.8093	42.0959	65.7881	85.7384	36.3843	29.151	46.5163	42.7113	-2.46837	21.7883	45.8789	23.5464	13.1046	55.452	24.2553	125.379	36.5814	104.163	54.2619	47.312	51.2331	17.1317	25.4003	94.3495	77.8976	29.8813	78.8661	18.2931	22.7056	23.1218	3.9333	10.4213	56.5553	19.7764	23.534	85.6306	14.7931	7.65128	11.8701	54.3347	15.3735
26.5	69.5442	125.471	52.1154	82.5124	60.1957	53.4782	56.4437	15.1663	60.5382	45.2304	65.8907	88.0293	41.1491	26.6237	44.3196	35.5621	-0.792891	21.1689	45.2688	23.3158	14.4094	49.741	25.2502	124.095	36.7655	105.248	50.3897	45.5756	48.1991	17.2903	20.4973	92.9271	76.1014	35.1679	91.7694	13.798	22.4208	26.7661	4.05395	9.6973	57.6412	18.0645	29.9538	88.6815	13.3659	8.94629	13.1389	58.2477	20.4213
26.6	65.3404	134.879	52.0396	84.6764	60.6712	50.0821	53.6507	15.3367	60.0332	40.9205	61.8873	88.891	40.6892	29.7345	39.3219	42.0474	-2.73451	21.4832	46.7065	22.9527	16.2763	47.0367	23.4869	132.57	37.3138	104.803	53.156	52.9612	44.6063	17.1861	18.4649	91.4965	77.9518	28.1646	85.8527	14.1002	21.5133	21.4467	2.4287	7.36078	59.9881	17.9883	26.4254	86.4856	13.3516	7.33576	11.5472	56.2345	16.4758
26.7	65.6028	128.112	52.269	80.3755	62.4445	52.0161	54.0281	14.6575	60.5925	45.0086	67.0755	85.8383	35.8818	23.0882	41.0773	40.9649	1.40622	20.4812	45.8787	20.206	19.3343	45.9374	21.3016	127.763	34.3732	104.462	48.4494	51.343	45.7105	15.7149	20.2296	88.3423	75.0285	30.517	85.3181	14.862	23.4582	22.389	4.23257	5.80143	58.2643	18.6847	25.6379	87.3376	15.2304	11.1022	11.6947	57.2979	16.4606
26.8	69.1591	122.711	54.0967	87.7868	60.028	52.3894	53.236	14.1768	62.0703	42.6665	64.4973	89.0816	35.3198	29.4643	43.1148	41.6269	-2.94074	22.3523	46.028	20.2658	20.5327	47.8596	25.122	125.238	37.1797	103.601	52.7268	53.9074	45.6863	15.6968	23.7766	82.7267	83.3166	27.0749	78.5421	15.0249	22.0917	25.1996	4.55694	13.5387	60.1432	18.4507	26.3545	91.1152	13.8499	9.6567	14.1281	55.3216	17.8351
26.9	67.5598	125.717	50.6377	82.1401	59.52	52.4414	59.0255	13.41	61.6443	42.7948	63.8653	88.578	36.8524	23.4636	38.377	41.5259	-2.93201	18.2234	42.4254	25.7262	22.0205	55.9856	26.4541	124.368	35.3669	104.55	52.1405	53.2151	44.3307	16.9922	18.43	90.2099	71.7058	30.3082	82.0344	14.5141	22.9049	23.034	2.05036	8.4234	58.1237	20.0477	27.6236	90.4533	12.8955	4.56063	13.5358	55.87	15.088
27	70.1783	131.37	53.9203	80.1054	56.583	50.0181	58.9245	14.7002	61.0135	40.1285	61.8839	86.197	29.9941	27.2055	36.9988	39.3371	-3.39427	15.9033	43.0612	25.3677	20.3699	56.0181	21.9101	135.035	40.4474	104.712	52.4455	60.4208	43.5535	16.7005	19.0078	90.4926	73.2617	28.0364	76.7402	17.479	20.814	22.6351	1.80511	5.37533	59.7863	20.7669	30.7585	90.1918	13.1924	5.67898	13.2306	56.2889	13.9099
27.1	69.5926	122.625	48.2085	79.6774	58.7812	51.4177	58.5709	13.2902	58.8909	43.0865	62.2885	81.215	36.2148	27.045	37.8856	43.3081	-1.76738	16.6272	39.8423	24.2924	20.0031	50.0466	25.2903	119.92	34.9095	104.631	51.3799	47.0195	45.0555	15.7067	24.7479	90.7176	75.8483	30.3292	85.0853	15.4635	22.918	22.2836	2.47864	8.83013	56.5941	18.8547	27.1608	94.2058	14.3112	3.8817	15.2025	52.99	17.742
27.2	72.9318	126.199	46.9943	84.9999	58.5748	51.4646	56.6378	13.7632	57.3293	38.9305	66.2903	88.3858	37.4037	26.5783	39.1926	37.9393	-5.89298	19.0065	45.2201	22.6887	17.2721	54.2591	27.5022	119.399	43.8377	106.281	54.0868	55.0412	47.6055	15.5164	19.7019	83.6163	73.4871	31.5263	75.6808	13.3857	23.6151	21.7024	0.782323	8.73441	55.6708	15.2494	24.7887	90.8398	13.1213	7.88893	12.4799	51.0262	18.2598
27.3	68.3149	125.214	53.705	80.1435	55.8745	52.8996	55.8398	13.8889	60.976	43.3137	65.0443	87.2662	35.3621	23.7693	38.051	37.9425	-4.00048	15.4231	45.0017	25.8858	15.2182	49.9558	24.1709	129.805	33.3667	102.78	51.8795	45.5778	51.6602	16.0411	19.7571	78.2229	75.155	31.832	83.3347	16.9849	20.1459	18.4615	0.933921	10.282	56.2252	15.8362	28.5546	88.8987	9.94345	8.54182	15.0441	51.3589	17.8117
27.4	65.5777	127.409	47.682	75.7855	49.8524	47.6222	58.3471	12.4677	58.3864	41.0135	59.4126	88.3832	31.2561	25.8017	40.4739	38.7889	-2.64665	17.3199	42.4669	26.9599	14.8599	49.749	17.3038	128.279	39.6914	100.313	54.2159	51.2281	45.1731	15.6863	18.0859	85.1833	75.9559	29.7822	81.4315	15.7186	24.1681	22.6047	-1.44697	11.0695	55.4336	16.5003	25.7068	89.8784	10.0423	5.68677	12.9061	53.5838	17.5925
27.5	70.5285	117.002	48.7712	83.8013	55.3847	49.7806	53.2322	12.2809	58.879	45.3162	61.9401	86.8076	33.7399	24.0839	43.669	40.2069	-3.62357	19.2645	43.9088	21.1259	16.3872	46.4593	21.6371	122.288	39.081	100.441	52.9868	49.9617	49.7821	15.3982	19.8827	82.5911	74.5386	19.7488	76.1494	16.5881	21.1687	22.0116	2.15444	8.94297	56.4221	18.2208	24.1258	90.8062	11.7401	10.4802	11.102	54.3378	17.5727
27.6	68.5806	125.407	47.3815	88.6033	59.9675	50.3761	54.6233	11.2829	56.1164	41.5207	61.7044	82.4377	40.5662	28.1501	45.2712	39.1305	-1.69491	22.2028	41.9234	30.6351	17.8071	45.2458	19.7345	121.879	39.9424	102.218	50.9331	46.6683	45.6447	14.1559	11.6161	80.4167	72.2863	24.7129	76.1432	18.9856	23.4227	21.168	-3.27189	12.4173	57.8065	15.9566	25.8689	90.5549	18.163	6.98055	13.9488	53.9933	19.8719
27.7	66.7409	122.404	51.2744	83.8153	58.0264	50.5432	53.7826	13.3192	56.1487	40.7247	59.8206	90.1616	37.8571	25.8664	38.8664	38.0774	0.224831	22.7674	39.1747	27.7863	17.3745	48.598	21.2898	119.761	37.5432	101.161	49.6355	52.2678	48.1307	13.7912	19.2293	77.7929	72.3485	27.185	70.3694	17.1562	20.7836	22.391	-0.447337	8.59241	55.1392	14.0793	24.1294	87.6654	9.60514	7.3646	12.7845	52.9788	21.3794
27.8	62.1866	123.248	48.4359	77.9577	61.3372	49.4442	56.1228	13.7305	62.871	36.5948	61.6048	88.9994	39.3837	25.0466	43.7184	36.7553	-1.88537	20.221	41.9076	25.6902	18.2317	49.31	20.2753	120.696	36.0839	102.658	49.968	46.3694	47.7482	13.9418	23.2122	82.3572	68.0067	24.7209	81.8986	9.0457	19.2466	21.873	-3.74975	7.56601	57.4156	15.2767	24.9526	89.066	15.258	8.78797	12.3323	53.9279	20.7635
27.9	60.0038	121.056	49.8754	77.4027	60.4038	49.9389	52.7797	10.9601	56.8932	40.5093	62.6544	84.16	37.3326	24.8145	47.2781	43.9411	-2.89756	20.3964	42.187	20.0951	15.4583	39.8897	21.7615	120.694	35.8541	101.268	50.1264	49.8724	44.7752	11.9611	17.8135	80.2928	65.6347	27.9447	70.7855	16.1979	19.0356	23.4926	-3.54103	7.64898	56.7241	16.5881	24.4573	85.9329	11.633	9.43742	12.6532	55.913	20.7054
28	71.1475	123.839	48.1336	75.8811	52.9987	50.2824	54.3481	12.9115	57.2699	40.9226	60.6481	83.1985	31.5447	24.0039	40.9393	38.3857	-0.924714	21.4945	40.1013	24.4225	15.2284	45.0371	26.3431	116.979	37.4768	103.934	53.5342	47.9745	48.4387	15.9247	13.7085	83.2145	76.0796	26.1077	73.7755	18.0143	21.6117	22.8015	-3.518	6.51573	58.1787	14.4037	24.616	86.1874	17.4246	6.91427	14.1169	52.6014	23.1997
28.1	57.1926	118.033	50.371	77.6461	64.278	49.8576	54.3497	11.3596	55.6643	39.1901	59.0037	83.7243	36.7205	24.3694	49.5003	35.9886	0.873781	22.5268	42.0765	21.6403	15.404	48.0132	22.8286	115.913	34.3048	97.7497	51.9001	40.5253	42.798	14.8975	19.9635	78.9889	74.2534	25.6144	79.6344	16.5072	20.3673	19.8947	-2.53243	9.83606	57.6687	15.8661	24.9526	89.8406	12.7525	3.73427	12.8637	54.3463	20.3443
28.2	60.8629	122.641	46.5589	79.2924	61.6913	48.696	53.06	11.9406	56.0746	37.8851	60.236	83.946	36.4278	20.7846	31.6682	38.0584	0.141669	20.4828	41.7182	16.39	16.8965	47.3604	26.5465	122.594	36.9333	100.567	44.2618	42.0774	44.0537	13.9212	14.179	77.9835	81.8876	26.4194	64.6997	14.3732	21.2516	23.1581	-1.43744	10.383	56.588	12.7389	24.5905	90.1415	13.9594	5.56233	13.5686	53.1372	22.3353
28.3	67.6342	123.62	47.8179	73.234	60.038	48.3205	54.2063	11.4116	55.5029	38.8177	58.1027	84.2742	32.6775	19.9692	35.5114	39.5376	0.260029	24.1967	42.7716	13.2566	17.4778	44.8036	22.4265	116.029	36.6647	100.146	49.5586	47.1959	45.4226	15.332	17.4158	77.7574	72.4013	26.5481	63.8752	14.5856	21.4786	28.876	-0.884286	12.6662	61.058	13.0364	24.8609	92.5279	14.3984	9.20676	13.4784	54.3515	20.8553
28.4	65.4364	111.975	48.8112	71.3515	54.9555	48.4769	53.3676	11.7644	54.43	38.078	60.9858	80.9623	38.6886	26.903	43.2376	40.8851	0.682714	19.7065	40.4168	23.5885	19.1429	47.7402	19.5537	112.946	33.7767	105.252	49.3699	44.8801	43.9088	14.2328	18.9691	75.0302	82.6905	29.2396	76.1254	18.4451	18.3516	26.5779	-2.67095	11.8569	54.0643	11.9413	24.9201	89.0107	16.3778	7.35094	10.1513	55.7874	21.6554
28.5	67.0999	121.922	46.8377	74.8514	59.257	48.1297	55.0881	11.4974	54.4835	39.4548	59.8237	79.6237	41.9264	24.1553	41.1033	39.9614	1.53335	21.6989	43.2681	22.8246	17.7281	48.3515	13.6297	112.206	32.9235	98.6484	50.1285	48.8224	38.7191	12.619	13.2792	71.9426	76.8374	29.2454	74.8053	18.0393	23.4135	30.7589	-2.00729	9.6065	49.2252	13.9252	28.8445	86.869	11.9591	5.79046	13.6152	56.2216	21.6297
28.6	62.7477	117.727	47.793	76.3005	62.8462	48.4514	49.6544	9.67349	55.5355	40.5061	60.383	82.44	39.5397	24.3996	42.1809	42.0769	0.64005	20.9956	41.6817	26.4956	15.5395	41.7448	22.3292	116.205	38.1519	97.5557	46.9342	45.4373	47.9093	13.4977	19.3583	74.6709	73.3152	24.9341	72.283	16.0795	18.1628	18.9576	-3.05303	9.70758	54.213	14.534	24.9303	89.2697	13.1484	7.02423	14.1275	54.5004	19.9053
28.7	61.8801	118.588	49.0375	74.1421	61.6126	50.2009	50.8569	9.95215	54.349	38.8817	57.2133	80.061	33.1063	22.1491	42.8678	38.6984	-1.21839	21.0842	41.7433	14.1799	16.9541	41.4044	25.2338	117.23	36.7858	95.6084	46.5345	44.618	45.4713	16.021	16.3428	77.2313	65.4255	26.4075	72.5559	16.0928	19.6027	27.9555	-3.94679	5.22369	56.6051	15.7592	24.987	84.7332	10.8631	5.24378	12.4517	57.0247	18.488
28.8	50.8985	118.694	48.4721	71.8244	54.5424	47.9508	47.8386	10.0019	54.3864	41.0414	60.0991	80.525	32.3049	21.9377	54.7152	40.5248	-3.50979	22.1701	42.8935	20.8168	17.901	46.3097	16.6083	107.602	36.8864	97.0917	42.7053	48.9735	44.4267	16.0178	15.3948	78.7113	64.8804	24.4824	74.9082	17.3207	17.2224	25.5727	-2.23271	7.07945	53.2034	12.6497	25.9312	86.6932	12.0961	4.8975	13.606	52.9815	21.6333
28.9	58.5453	119.859	49.5819	76.4611	63.0571	46.6981	49.3595	10.4954	54.0592	46.4285	54.6459	80.3419	40.2429	22.8666	50.9475	36.3539	0.49229	21.6102	41.6755	19.279	7.4113	40.3753	21.8775	111.945	37.3059	96.9558	50.4917	43.3898	43.1803	14.4728	17.1276	85.7479	61.0206	23.8458	70.3691	14.723	17.7498	25.8515	-1.55148	7.55907	57.5867	13.1282	24.9729	84.4479	13.8911	4.35933	12.2488	55.378	24.5003
29	57.3857	120.582	44.9762	76.2023	56.8528	47.8289	53.8384	11.8829	52.3917	40.0324	57.0382	84.2272	36.8598	24.3833	47.7059	37.3808	1.27724	22.5882	38.4816	16.8626	15.3675	42.8837	21.2512	111.602	32.8467	100.321	48.3175	48.7527	46.7937	15.2543	17.8508	77.6589	73.7918	24.6276	70.2231	16.8685	20.0958	20.6792	0.155356	11.2737	57.6356	14.7002	25.6987	83.7366	12.4662	6.62315	13.7834	53.7214	18.7271
29.1	60.8479	118.727	41.8819	74.033	61.8067	48.8659	52.0488	11.7522	54.045	39.273	57.2834	77.3005	40.6174	20.4537	45.3647	38.4368	-1.70736	16.8971	41.8754	21.3404	16.8439	43.3348	15.5602	106.727	32.1715	100.3	49.6139	43.9584	44.8482	15.2865	18.2061	77.8021	61.3786	25.564	74.2573	21.1834	19.8798	19.5061	-0.312065	9.40606	58.0514	15.6286	27.6756	88.0184	13.7735	5.60921	14.3714	57.9276	17.7889
29.2	63.3309	118.821	43.6562	79.1532	61.8811	48.193	49.8158	12.9299	52.7298	41.0216	55.6821	83.199	39.1331	22.0075	54.8179	41.8244	-0.0543508	18.493	38.4337	15.8811	13.4433	37.1893	25.5443	114.916	29.9358	103.446	48.5373	45.1568	38.1243	14.1073	15.5206	75.9181	71.1224	26.1115	69.5454	18.3027	22.2388	18.3158	0.0350599	4.77248	54.1981	18.9563	23.3469	88.7102	13.9501	7.19296	13.9973	59.0159	17.2042
29.3	63.5501	110.519	46.9172	78.0585	59.5857	46.7251	48.765	10.3108	51.2524	35.279	56.0372	79.9667	36.3921	20.3364	49.3677	38.6331	0.379317	23.2468	42.1969	16.2032	15.72	43.2101	15.9488	108.163	34.4476	102.537	47.5522	44.7562	47.407	15.3016	14.7519	76.2278	70.93	20.9474	60.9302	15.4934	19.5689	22.1232	0.813368	4.83509	55.5986	11.2652	26.5273	85.8544	10.4767	6.14467	13.2624	54.6328	19.299
29.4	62.3207	114.335	41.4363	74.3971	55.162	45.3149	48.1943	7.84166	56.7044	34.1531	57.229	85.7172	34.8179	19.7132	42.5894	37.4508	-0.480209	22.015	38.6452	19.5008	16.9235	39.8918	15.6043	115.679	35.0633	98.3437	45.731	49.283	41.9704	14.3571	16.0623	74.1421	71.1756	26.0294	70.7894	17.0935	15.9714	19.6935	1.53856	4.53645	56.7196	17.553	27.8275	84.8608	14.6342	6.55297	14.7179	54.4336	20.9806
29.5	61.4651	116.41	41.8725	74.2841	59.1066	46.2558	49.2679	9.27449	50.7994	38.5542	55.8186	83.2151	25.3381	21.241	57.9271	36.9352	1.65662	18.3019	38.8705	19.3263	14.879	38.3622	16.4977	114.532	33.8835	99.3472	47.8779	47.9841	33.9747	15.6802	18.6591	77.0339	61.7257	24.0645	65.4259	16.122	19.5694	23.2468	-0.109351	4.75806	52.8002	14.4799	28.4462	82.8061	7.43168	4.9756	13.1268	54.2683	18.8788
29.6	62.7701	119.334	42.2137	74.0845	62.8918	49.2222	48.9655	11.7065	53.0058	43.1524	54.166	82.4258	30.3847	20.1702	49.9696	34.1499	1.5137	20.5951	39.2569	18.6452	14.9613	43.9656	14.2978	107.695	37.3524	99.0024	48.2902	46.6859	36.5118	15.6876	15.4459	69.4213	72.1861	22.8755	75.3763	14.5176	17.2313	23.1955	0.253252	8.4443	54.0859	13.5511	24.7832	89.1472	11.0568	3.46327	11.6477	53.4102	18.5125
29.7	62.4202	115.047	44.2397	72.2097	56.0648	48.0364	47.5757	9.60213	52.8438	39.1142	54.1513	78.4989	28.9514	21.0363	51.2469	38.4546	0.681618	17.6457	35.8528	11.4576	11.6809	45.1568	16.7911	106.294	31.6174	94.6163	46.8871	44.3889	37.6788	13.3776	9.75891	77.3368	66.3924	21.5848	64.4701	19.3379	18.1771	22.4568	0.710822	11.4944	52.2562	3.58512	24.9424	87.878	10.2839	0.854524	13.1641	54.5054	18.4933
29.8	59.6295	110.345	39.4631	71.8462	56.6268	47.5067	48.0228	9.48097	51.4312	37.2161	55.1284	79.7124	36.2942	17.8783	48.3032	39.0475	1.6537	20.7732	38.309	19.9216	13.2955	45.9226	10.3059	106.23	34.1738	99.8822	50.4557	44.0113	40.9542	15.3192	19.7862	72.8197	69.1719	28.4747	61.6507	17.8553	19.5372	22.6433	-1.03299	7.83567	53.8108	5.11611	24.11	85.3422	9.36822	0.467263	13.4145	52.8717	19.6606
29.9	64.0588	113.607	38.5355	69.7675	54.7975	46.0819	46.9862	8.30773	50.2856	38.0585	53.5968	79.1232	33.4356	20.2235	49.7105	35.7495	3.35594	22.4879	39.3959	17.1589	13.3508	42.6479	16.8845	105.107	30.4584	93.7793	48.7693	46.6809	43.5075	14.8628	7.92617	75.6556	65.9648	21.3784	51.166	14.628	17.0623	20.4759	-2.34755	9.28321	55.4233	2.99859	22.743	87.0171	13.3133	1.88554	14.7594	54.5595	18.0301
30	55.8586	114.972	42.6688	77.178	54.7963	43.8005	47.2406	10.1175	53.8195	38.5842	53.1139	76.3305	33.6786	22.6145	52.3885	36.9879	-1.99171	19.9497	38.349	18.0927	14.9512	45.1417	14.6523	105.18	29.3984	95.7062	47.1372	47.6009	36.3888	12.9879	15.6847	77.965	66.7213	22.0891	58.0359	17.1473	18.9594	21.9275	-3.05997	5.16461	51.2708	6.58752	22.6342	83.2972	14.9569	2.11033	13.9978	53.109	19.6927
30.1	56.5434	113.993	40.8163	75.719	57.9513	45.4131	46.239	9.72279	53.582	35.8992	56.4347	81.1882	29.9794	20.1379	56.3875	34.9642	-2.86519	18.5194	38.4486	18.3586	12.1018	37.7249	8.68585	105.307	33.6455	94.4971	48.4654	47.51	38.1806	12.4853	12.1752	73.2429	67.4024	21.335	64.5044	15.9871	17.9835	19.0706	-0.610184	8.42215	54.775	11.562	21.1699	83.6128	13.0576	3.47936	12.2171	54.8088	18.2812
30.2	59.036	107.156	44.0693	71.3493	56.7478	42.9833	46.2058	8.61709	52.524	33.5044	54.6608	77.1475	32.1896	23.8437	48.8944	39.3207	-2.99024	20.5092	37.9973	20.2623	12.8696	52.995	14.0237	104.34	31.0958	94.3533	45.5817	42.7339	39.4215	15.246	14.2868	75.6067	69.3844	23.0251	58.3494	12.3183	20.1542	23.4121	1.78158	12.7516	52.9617	12.5391	21.4191	83.8569	13.7072	2.17677	13.1949	52.2723	17.8204
30.3	55.6689	111.327	36.1647	72.6402	57.1524	44.4067	46.7294	9.41688	51.496	39.5503	54.0802	78.0164	36.5523	23.9622	50.7233	38.4291	-5.34335	20.8788	35.4312	22.2794	13.0524	34.957	3.08051	107.586	30.5668	93.4093	49.3618	40.9919	35.1429	13.4284	11.0804	80.3853	65.6878	22.0089	57.0746	14.8724	18.3648	28.5247	-1.30886	8.60591	53.2526	12.9636	24.9429	82.4965	9.84136	0.806906	12.8608	53.2148	17.7498
30.4	59.4587	111.355	40.9008	67.7724	58.9583	45.6015	45.7747	10.7652	51.5321	37.3744	53.196	73.4573	28.3538	21.6233	45.4002	41.1216	-5.57308	20.5416	38.7436	18.1529	11.5039	38.6559	11.3548	101.993	28.0551	95.6471	45.5587	41.6435	38.6006	16.0749	17.9603	73.0498	60.4417	23.4971	61.4433	12.5295	18.9652	19.5222	-1.29755	9.07156	50.6363	10.9301	21.9172	84.8466	14.7759	1.58573	13.0889	54.5759	19.9576
30.5	62.088	118.293	41.0311	64.216	53.898	44.3991	47.3617	8.72386	50.1805	38.1414	52.8828	76.3263	28.172	22.1587	45.5502	39.4076	-3.26718	21.1877	36.3675	20.3466	13.7247	40.3263	14.718	109.535	30.6485	94.3638	49.4563	39.9797	30.351	13.9725	9.559	66.1713	62.9535	24.1511	51.0319	13.9137	18.6892	22.774	-2.43414	11.1086	54.7584	14.9198	23.7623	81.8322	15.0169	1.06292	12.6809	53.5979	21.2565
30.6	55.3403	121.732	37.4333	67.4594	60.0311	44.4531	47.1799	10.9036	55.4334	36.9686	51.736	72.5853	28.1194	21.4666	50.6019	40.0062	-5.16944	20.6232	36.4091	18.8372	14.7267	44.7284	11.185	102.966	28.2033	95.7371	43.8442	42.4434	35.5893	9.33565	16.5681	65.2862	68.6328	18.9618	59.7516	13.7373	17.8125	20.1402	0.384566	9.51001	55.9964	10.8543	22.88	86.3168	12.9006	1.856	14.1278	53.8399	21.23
30.7	51.0977	112.874	36.9234	68.3509	53.7152	40.2176	43.3651	10.5814	49.4415	37.8874	53.9893	70.6549	30.7286	20.8847	50.7083	37.5351	-0.615261	20.2063	38.2282	20.4824	14.892	44.5266	16.2001	104.332	29.4409	93.3557	45.784	45.6523	38.9116	15.375	12.1168	71.8897	65.9521	19.7578	61.35	9.95864	18.0209	23.5863	0.152315	9.09535	53.5932	9.68939	20.1443	86.5575	16.7522	-0.772939	13.1582	54.1605	18.2069
30.8	48.9761	107.706	39.4804	67.9236	59.2942	43.6611	50.312	11.002	49.4662	37.8096	55.3238	70.8021	27.623	22.4255	48.6917	38.6244	1.07436	17.9024	36.2948	13.8125	15.4156	39.0785	10.9109	97.7547	28.6331	93.8196	45.4111	42.6725	40.0373	15.2012	22.2987	73.9867	62.4701	22.6539	68.9964	14.534	18.137	21.3889	-1.27268	12.8879	54.6461	12.8879	25.1607	83.4624	16.3601	3.12192	13.6277	48.7366	21.0298
30.9	60.8642	108.301	37.3815	68.0665	55.5168	42.8501	46.4842	3.53059	52.8408	33.629	52.2021	71.5695	26.808	22.7929	50.5663	33.6287	-0.40545	20.7779	41.3171	21.5108	16.3937	45.9782	13.1258	104.663	29.8288	91.7238	46.0924	42.832	28.9658	13.8648	12.7953	69.7011	63.5799	21.9504	66.3102	13.0634	16.3707	21.7481	-1.67686	9.94566	51.509	12.4192	22.8029	77.6971	12.6148	0.477722	13.1568	53.7798	20.2554
31	56.6361	118.932	37.8157	69.6454	54.8715	44.187	47.2373	9.44292	52.9677	32.2185	54.9059	71.935	27.3881	18.1161	47.5697	34.3731	1.89652	19.5321	37.4876	16.0569	16.2048	41.1359	14.5701	104.668	32.7718	93.0733	46.6091	40.6922	29.968	14.1073	10.6879	72.0195	60.1484	22.0803	53.6907	11.5797	17.6416	20.0864	-1.9943	9.70165	56.4994	10.5162	23.6279	74.4904	14.0738	1.87604	13.5652	54.5099	21.4697
31.1	54.4186	108.496	37.9271	61.5056	53.3804	42.1116	45.2039	8.38661	50.1286	36.5091	53.2904	70.4066	23.0489	17.7677	54.89	35.7074	-3.22807	19.9775	36.4639	13.9979	13.7403	43.8838	9.33971	94.7163	30.0773	95.5778	47.7035	41.8681	31.4833	12.3511	17.0655	74.9885	64.6346	22.3543	68.5985	13.7459	18.6606	20.4777	-0.26799	12.8025	56.0407	9.7865	25.6088	74.3292	11.6249	0.276123	12.6705	56.8527	20.9016
31.2	58.6453	106.546	45.3001	63.6961	52.5521	44.2	48.6963	10.9338	52.3038	33.3807	51.0832	71.5353	27.3594	20.547	54.4429	37.1026	0.134139	21.7039	34.7918	19.088	12.8987	41.9015	11.0776	95.4461	31.7027	94.2458	48.242	36.8797	35.6022	13.5283	13.1898	72.3673	63.2063	16.6626	66.2052	11.8897	18.7991	21.9685	-0.712213	12.6336	55.9198	11.5725	26.5199	73.6459	15.0726	2.064	10.4674	51.961	19.9146
31.3	58.1006	115.141	42.3007	65.5325	57.7732	42.1466	48.4591	9.99307	52.289	37.3353	50.45	72.1319	34.7711	20.3747	49.9735	36.541	4.74519	20.3164	36.1199	23.1878	14.0478	44.5648	6.8804	97.6099	31.7016	95.9008	46.4229	40.4692	32.7302	13.1855	15.346	68.4135	61.5791	17.4006	65.5518	17.6521	18.7446	19.7016	3.3044	10.1257	55.836	14.4766	26.4216	74.081	10.9551	3.27986	11.6081	51.3859	21.2851
31.4	66.4301	108.404	44.2711	57.7868	57.6777	45.5606	40.5594	8.06868	46.8976	37.0091	50.6444	70.9426	26.0301	17.9932	53.4485	36.2165	0.374888	19.5665	36.0271	19.875	14.5389	36.3356	6.65955	98.6023	29.8865	92.579	45.5245	40.5746	39.1186	11.8625	12.5712	69.034	62.671	15.3519	56.9698	18.879	20.1126	19.1438	0.169189	8.35671	52.4742	9.46957	21.0901	71.3096	13.9295	2.64317	10.8536	53.6313	20.562
31.5	58.0651	112.847	47.7373	68.1403	55.234	42.3937	44.4258	9.04973	52.1952	38.1651	50.3764	73.0537	22.8504	18.8693	54.1293	35.0564	-1.27588	20.0533	37.0003	19.4412	14.985	36.3941	9.96599	104.176	27.9329	95.3655	45.3163	40.7978	35.5675	12.0005	11.8336	74.2696	52.5181	10.7693	56.8637	11.0822	19.1793	21.8045	-0.807253	9.96045	55.118	10.5092	25.5534	71.6287	12.2267	2.2502	10.8095	53.0039	18.7725
31.6	59.4486	115.493	42.3079	66.2504	51.9763	43.6678	43.4762	9.27187	46.439	36.7976	51.4999	70.5113	28.5996	25.9989	54.155	35.3086	0.315112	19.3368	37.6422	19.5227	13.6117	43.7863	10.2379	100.509	22.5502	92.9293	42.9613	37.6661	39.8093	14.1175	16.6773	74.1051	62.1561	19.7771	55.1281	12.7709	18.4912	20.2278	0.870486	5.47328	55.9256	9.26792	24.0856	72.9846	12.4417	1.89824	11.1331	54.0072	20.9967
31.7	67.2541	111.228	44.3888	64.9821	52.7078	43.705	44.9728	8.77567	51.5944	34.8125	49.0758	74.4901	24.9594	16.9522	48.549	39.4602	-0.415699	23.157	36.7852	16.0923	16.0713	37.6621	11.6725	97.8575	26.1908	90.4928	47.3322	34.9274	30.6534	13.4487	17.5163	69.7302	57.2613	22.9141	60.9708	13.1803	16.8239	19.3243	-0.544338	8.39677	59.9975	7.47355	25.799	71.3593	10.0757	4.19357	10.315	51.8954	19.5684
31.8	64.7172	109.771	40.0286	59.268	56.779	45.1216	47.8696	7.86969	46.7124	32.9804	50.5978	73.7284	25.3427	17.3888	56.7959	31.147	1.51974	20.4418	36.8749	19.1004	14.2137	38.8199	10.439	101.485	28.8961	92.239	44.5618	27.2369	34.4166	14.1555	17.3847	76.1335	59.0481	18.0103	53.3231	15.9145	17.376	18.9763	2.0648	7.50832	57.5622	9.65215	24.3127	74.278	10.3774	2.95064	10.5791	55.104	20.5491
31.9	63.7042	105.269	41.898	58.5175	58.9943	44.6847	40.703	8.07134	49.3306	33.0686	52.0525	70.9786	27.4327	20.8998	54.8939	38.296	0.246406	21.2898	35.4066	20.8303	17.1682	32.3454	13.4802	93.4776	25.3152	90.6579	45.7173	31.8459	27.6427	13.9236	17.2568	67.142	58.7512	19.7073	55.2223	13.1679	16.2802	20.2387	1.47601	5.75216	58.8137	6.63962	25.1475	71.9483	10.4898	1.74167	11.8543	53.8635	22.596
32	65.198	106.951	46.2826	64.2483	55.8139	43.2824	45.1256	6.689	47.0205	34.0445	50.3493	66.1559	20.0063	18.5324	61.1764	39.0801	-1.628	19.7107	35.004	18.9229	16.0283	40.3747	12.1867	100.698	29.0777	90.2221	43.2026	39.458	30.5632	14.3452	17.402	64.5874	52.5529	20.133	62.1139	9.75576	17.7598	18.7245	2.70972	11.2496	55.4622	10.5628	26.2978	71.1581	8.15004	4.89128	11.1114	55.1164	18.9769
32.1	62.5284	108.047	43.1641	67.0889	56.4744	43.0142	44.9531	10.5757	49.5025	29.704	50.5456	70.1575	24.1985	17.0329	62.2563	35.5438	0.290674	17.6678	36.3789	19.2304	20.2423	44.6843	13.9036	98.4438	26.3934	92.9794	42.1971	34.6583	35.8078	14.0367	16.4892	71.1599	57.4004	16.6658	54.4998	11.6553	18.2525	21.5145	-0.685836	5.76631	60.1685	11.4324	26.066	75.8668	14.2573	1.71462	12.3415	54.4883	21.9173
32.2	66.6893	106.762	44.8388	63.6024	54.6217	39.6641	47.6588	7.51404	46.564	34.3095	48.0751	68.6332	20.7699	15.0429	56.7945	37.3989	-0.580343	17.7248	35.4336	17.6562	18.2845	35.6847	11.3369	102.312	25.9578	92.5248	42.9226	35.1727	30.9922	14.112	11.6028	72.3435	57.3256	20.6645	51.8367	11.6198	18.3437	21.3069	0.520399	6.1579	56.3121	8.40745	27.6134	75.5506	4.38126	1.90494	15.5237	54.0739	17.5452
32.3	63.7951	104.165	42.7138	64.8739	56.4327	42.2161	45.2588	8.91823	47.1064	34.4261	49.0169	70.7295	19.8795	17.7996	51.37	34.5831	-0.239347	18.289	33.4818	13.0963	14.8887	33.2419	14.017	105.037	26.8912	94.1477	41.867	31.0398	29.4623	13.3892	13.9129	70.6054	57.765	22.2976	52.4019	8.69139	17.9178	20.0094	1.78172	4.65675	51.0985	11.6574	22.6545	75.0261	13.6053	3.66525	13.172	52.367	16.3897
32.4	61.9166	115.361	42.8107	63.083	56.0412	45.5169	46.047	6.99345	44.6647	39.6237	51.0313	68.6232	21.595	20.6044	43.9186	34.1707	-2.59791	16.3084	35.3118	12.7976	16.1697	36.3185	15.6158	94.3452	23.903	87.1758	43.012	41.3956	39.4462	11.2963	14.3925	71.136	53.9757	20.9531	48.563	11.613	16.5307	22.3114	2.1619	5.91553	55.034	11.9924	23.1268	74.9628	9.00311	3.1444	14.3339	52.3504	21.1648
32.5	60.6532	114.578	41.4161	60.051	55.2442	42.0129	43.4366	7.48297	46.6478	31.2423	50.2245	61.6628	26.2889	19.3521	31.2496	35.2153	-4.18671	18.094	36.0651	11.4081	15.2619	42.9498	7.31711	93.8157	29.7557	89.3972	45.6967	39.1129	35.7581	12.9856	13.5323	70.5784	60.2672	17.7142	57.0958	13.164	17.4045	20.2711	-0.358536	7.30889	55.7092	11.658	25.4158	75.9129	12.0692	1.91602	9.94714	55.1367	17.6737
32.6	62.6135	109.936	42.057	60.4304	49.5388	40.68	45.2682	9.13778	48.0949	27.9263	49.8887	65.2309	24.576	18.9961	21.8185	33.3103	-2.811	20.3991	32.2869	19.7114	14.6725	33.1482	5.80843	97.4917	26.3472	92.9612	43.3309	28.8783	31.3867	14.7569	17.4305	73.3507	54.5928	21.0989	60.1425	10.416	18.0634	22.4288	-0.457726	8.47208	51.4542	9.29378	26.6718	76.9204	11.5775	1.21082	13.2951	54.7728	19.588
32.7	57.1	108.672	40.3166	64.7483	48.4047	41.2841	44.6134	5.93117	47.8408	34.813	46.9391	63.5444	24.3915	19.0117	39.593	40.0945	0.540638	17.8991	34.4554	14.4905	12.7601	41.2746	10.6508	88.1366	24.7324	91.4209	42.6188	38.631	40.5265	15.8025	17.943	78.6911	54.5499	21.6566	46.4698	15.7483	16.084	22.0665	-4.13568	6.2577	53.0713	10.0412	25.0781	76.1088	8.07095	0.664746	12.0879	52.3821	18.5992
32.8	60.2233	104.848	41.7344	61.8092	49.7552	43.131	43.4401	7.02558	46.4056	31.9105	47.5133	59.9226	26.1459	19.6919	31.644	38.5436	-2.65934	15.6374	38.3678	14.7021	15.0227	38.9904	13.2013	92.861	24.7386	90.376	42.3045	44.9376	34.4406	11.0321	12.3053	71.8928	56.8131	19.8766	42.4109	11.5784	19.5147	24.2883	-3.34292	10.3829	54.7158	12.674	26.3363	77.4231	13.4822	0.799279	11.0713	50.0617	19.6312
32.9	65.2207	108.945	36.7051	64.3044	50.6071	42.3059	40.8667	8.68015	45.3137	29.9863	48.6759	63.8543	24.4603	14.561	32.3468	37.6464	-2.49297	15.6369	33.1496	25.2548	9.61522	37.4441	4.33273	94.2513	23.1544	89.8214	44.8365	38.5851	34.6929	11.6847	14.296	73.5562	54.2703	16.8423	52.2764	12.441	12.956	26.6065	-1.22391	8.1723	55.0731	14.5677	24.5898	74.371	9.85516	1.51787	13.2025	53.8033	19.83
33	59.5638	103.393	39.7548	59.9032	54.7908	41.4373	48.3283	8.37952	46.0114	31.7721	50.0331	69.5667	20.3913	16.5008	33.7346	37.5259	-0.690222	19.3866	33.8033	18.2193	13.1755	34.7896	8.29739	89.9545	26.1197	93.5521	42.7138	30.1333	33.5085	12.7542	9.50476	74.7988	52.94	17.5638	47.4279	13.3065	17.4696	29.3536	0.841065	11.1232	51.7253	12.0128	26.7207	75.5883	14.3211	0.338675	9.28708	56.0471	18.8694
33.1	56.5706	114.723	38.3472	55.8379	50.3282	43.252	43.6747	8.00697	48.0697	35.9213	49.8906	64.7587	20.8838	15.3033	24.5993	37.7479	-2.41319	17.4027	40.4634	11.4619	11.1833	33.2857	6.8278	84.7569	23.0712	89.664	39.4855	22.6412	35.3802	12.5575	14.4129	66.8527	55.6449	21.8214	55.46	11.5932	17.8205	23.912	-4.79006	12.6095	53.3019	11.2227	24.8064	76.7197	9.55725	1.7845	12.1622	48.8499	16.6799
33.2	66.8709	105.302	36.2309	64.4485	53.4855	41.6296	43.8694	7.74528	46.8145	35.917	47.1931	63.4242	13.8524	14.5418	25.3285	38.6101	-1.34296	17.4167	35.3966	15.6549	12.6734	38.5183	11.9529	94.2415	25.4788	89.867	40.5583	33.4532	35.1591	11.8005	14.3296	65.335	53.8052	17.8617	49.3386	11.8228	16.6919	27.8254	-7.13771	9.87906	51.9724	10.355	23.3492	74.1298	11.4624	-1.02045	14.3956	53.7856	16.9396
33.3	54.4862	107.175	39.8205	63.83	56.9179	41.1676	43.9139	7.6349	48.6027	31.1277	42.269	66.7714	27.0392	17.2937	37.6966	36.8133	-1.80764	15.9403	35.7254	14.2675	14.8999	34.8523	15.09	86.6185	28.5305	91.1917	41.516	31.3022	31.0271	10.7611	12.2712	65.7119	52.7672	22.2679	49.4928	13.0404	17.0333	23.0462	-3.43978	7.72956	53.1272	15.3166	27.8084	74.7269	13.5307	1.43526	10.7379	48.4835	18.6017
33.4	49.401	108.337	38.2936	57.4757	50.2409	42.724	42.8123	4.63611	44.5677	29.224	45.6568	68.9007	21.534	20.277	32.6181	35.3536	-4.28793	18.0004	35.7365	17.4224	14.1173	30.5535	6.64491	90.6658	26.3265	91.2021	45.0076	33.856	36.3899	12.5742	7.97864	68.543	57.4453	15.0408	43.256	13.8703	15.9003	20.6096	-2.1746	2.75021	52.3591	11.7714	25.4926	75.4344	11.1267	-0.334029	14.5201	49.3829	22.1893
33.5	55.5996	108.424	42.6644	50.4072	47.3916	44.8758	45.2567	6.9578	47.2903	33.5517	44.7504	68.3669	21.8019	17.5352	40.5516	35.0486	-2.91071	19.1142	35.7943	19.3338	17.741	34.7948	5.09713	91.9844	25.8051	89.6676	42.4801	37.1488	27.713	12.258	15.4267	60.9475	53.9171	18.6061	50.4482	12.195	17.5445	21.0757	-3.63362	7.44042	50.6525	9.33651	22.5767	75.4689	11.6482	2.04466	11.887	47.5852	17.781
33.6	55.5258	114.87	34.858	60.7797	47.3684	47.5879	43.2511	6.20602	46.1362	33.6503	45.6381	69.6213	23.533	16.8835	33.338	43.3228	-1.53149	18.2255	35.8007	16.9097	12.9932	38.8783	0.495865	90.4011	26.7972	90.2297	40.4989	35.6859	32.7248	13.5332	12.0097	64.9537	51.5905	17.8866	53.7826	8.85564	17.4624	20.7845	-0.76068	8.56786	51.4851	11.2607	23.4615	75.4347	12.0434	5.62329	13.6271	49.6	18.6309
33.7	58.508	108.9	39.1177	58.7837	51.0529	48.234	43.5044	6.84033	46.3926	36.2201	40.1757	67.9583	20.1806	17.9484	41.5195	37.3607	-5.49641	20.931	31.3945	17.4426	14.3712	34.364	1.94332	82.9137	31.5791	89.0193	40.1893	36.463	31.4119	11.1015	13.0502	65.5799	56.6053	20.5103	44.8518	10.3885	18.8714	21.0257	-4.97498	5.74707	47.9651	11.3163	25.1001	72.0624	13.5906	2.16439	14.8293	50.3742	15.2859
33.8	54.9907	112.762	36.7259	52.0703	50.0147	48.0343	41.6808	6.35811	45.5807	31.4388	43.5774	69.472	19.5346	19.2507	42.0774	36.9253	-4.31032	20.9399	34.509	10.427	15.4231	34.4141	4.5389	88.7739	22.0569	88.2184	43.0481	31.6554	36.8188	13.0527	16.6124	65.6101	57.8506	17.1773	49.6888	9.1077	17.2208	23.1641	-0.589451	11.7845	48.098	11.909	24.1123	71.6116	10.6194	-1.20824	14.5438	50.6932	17.0721
33.9	44.6916	107.038	33.4569	54.7307	52.0998	47.1235	42.4075	4.2861	42.5545	31.7517	42.4028	70.3158	18.5067	18.1247	43.0078	36.6848	-3.05474	18.7807	33.4513	11.6949	16.9669	40.9374	-0.350086	85.2797	21.4673	89.5957	43.573	35.6579	34.793	11.5217	20.9339	67.2713	51.2588	19.2662	45.9499	11.5029	16.6158	21.74	-1.47921	7.21579	49.2298	10.4913	23.1899	72.5575	8.43183	2.77682	13.7479	50.4861	17.2866
34	46.212	106.461	37.2161	47.5083	49.224	49.5907	39.4843	6.79553	44.6157	26.9724	44.1717	63.1212	17.6519	16.4212	44.7979	34.1127	-2.71205	20.7468	32.2867	9.06336	12.3884	29.8421	11.1419	90.9887	25.9433	87.2233	40.6295	21.3581	30.5051	12.0054	15.5813	65.1873	59.3786	15.7225	44.788	12.1243	21.5067	24.0935	-1.84165	6.23545	50.7785	9.21376	26.8448	75.7419	7.81964	0.936815	14.2564	51.4249	17.346
34.1	46.7218	105.903	36.4593	56.8513	47.0528	51.2584	44.2243	4.21257	44.7697	28.5172	46.0898	67.4503	21.7725	17.8629	45.2174	38.1753	-2.5398	19.8788	33.3686	13.2755	11.9509	41.0789	7.74604	90.339	24.7761	90.9725	42.2109	26.4441	34.9681	15.1882	14.2054	75.3082	46.4799	17.2212	46.4242	12.1514	17.8518	21.4201	-1.44195	7.64518	50.3089	9.17374	26.0775	73.0342	11.0765	2.57683	13.9586	51.1558	16.2263
34.2	46.1213	106.959	43.3315	51.0253	49.2229	48.2405	40.2567	6.58012	43.4911	29.9106	44.0848	70.6017	21.3713	13.9765	43.0272	32.4102	1.66528	18.6736	31.4231	11.965	14.0574	38.2162	8.58261	89.6534	20.917	88.5533	40.2617	26.6794	33.5736	12.45	14.0901	67.0041	53.6866	16.6538	44.9223	16.6401	17.3894	21.68	-0.974216	8.61254	49.3897	10.4955	25.8913	75.0834	9.98155	0.701944	16.4254	56.2154	14.9
34.3	46.7172	107.506	38.1756	54.1257	49.4241	49.0048	41.4356	5.75674	45.2665	28.3177	41.5243	66.3937	22.9799	16.7116	42.8796	35.5447	0.297854	20.4762	28.2864	22.4691	15.1907	36.3301	11.4709	93.8987	23.0967	91.9274	39.5006	35.1786	29.702	13.8497	15.3047	70.9401	51.3539	18.5103	52.3094	9.91578	16.8147	24.5503	-2.69415	10.4657	49.6823	10.4174	23.6059	75.5679	11.0156	-2.02468	17.0723	55.2436	15.2784
34.4	54.9222	105.085	36.6402	50.8302	48.5545	49.27	47.2889	5.26645	45.6117	29.9283	43.317	66.6636	21.9743	19.4714	47.4522	34.7628	2.51916	19.4597	35.064	17.1209	13.9938	35.9134	4.71122	87.491	27.426	88.1619	40.3459	31.8239	33.5493	13.5111	15.8016	70.5338	51.4583	14.0606	43.7074	13.1821	15.1797	22.9827	-1.32318	9.83525	47.8291	8.15986	24.2794	76.9342	13.6307	1.74965	13.0151	56.4835	16.5951
34.5	54.1994	103.616	36.1362	51.7471	48.3081	47.4365	42.4291	5.9764	43.0133	27.072	44.5437	66.5346	22.2316	18.45	48.4714	32.1589	2.38419	20.0594	32.9083	13.6727	15.2985	35.8829	9.23433	76.7384	27.3298	90.7657	41.8634	33.9488	30.5605	13.1625	16.4489	70.8644	52.5741	15.9459	49.9696	8.2968	18.1763	19.6045	-2.91423	7.82258	47.3089	9.55386	23.5769	77.9523	8.65428	-0.23209	12.9089	55.043	14.2212
34.6	59.3765	99.4297	37.5002	52.7894	48.561	47.2955	43.2677	6.35722	45.4481	26.2301	44.8006	65.0743	20.4906	18.1042	53.0816	33.7861	3.27686	18.2006	33.3407	17.9503	12.4883	38.1522	14.719	86.8994	22.8666	89.9459	43.1319	31.7069	32.1179	12.326	13.6321	61.6842	54.0343	16.3426	47.0107	9.56826	15.858	16.8953	1.12063	6.53717	48.0194	12.3896	23.1947	78.2221	10.831	1.73328	15.3345	58.0664	18.1827
34.7	44.1176	97.4944	37.5976	54.8103	51.2539	46.6876	42.3825	4.60969	40.7428	27.7333	42.3641	66.9669	10.7003	13.4149	45.2339	39.5119	1.50875	18.9272	34.5812	17.8097	11.8337	30.6945	5.78671	82.1329	25.2735	89.8612	41.2603	29.005	31.9432	13.0066	13.4208	68.1278	55.4861	15.9696	47.9056	9.69415	17.1057	19.9861	-0.768491	7.25088	50.8628	9.4601	22.4721	77.8102	8.98725	3.32394	14.1953	51.8438	14.3022
34.8	50.2322	109.333	38.9659	51.8935	50.7166	47.9299	40.2774	6.32811	42.2034	28.4725	43.2642	65.363	26.9638	15.6568	50.5285	36.8124	1.08157	16.3633	34.5893	15.1587	14.2598	38.2213	9.92632	80.5056	24.4403	87.9157	39.9641	37.283	31.5247	12.5337	8.72202	62.4694	45.671	15.5587	45.0206	6.76833	18.2927	21.758	-0.776337	6.67508	46.8018	10.7183	22.9905	71.0009	8.24466	3.32762	15.3626	55.0526	16.7743
34.9	58.4962	98.8162	35.4148	54.479	42.3423	46.1765	40.1443	6.51303	45.1814	28.12	42.8486	68.8708	17.8114	13.7202	44.4711	32.9333	-0.165923	17.8944	35.487	25.0343	13.315	34.0283	5.40795	80.7592	24.2609	87.6647	38.8781	31.5754	24.797	11.8382	-22.8153	66.7355	47.2453	16.0063	43.6004	14.0848	15.6149	21.9906	-2.11942	7.51234	45.5184	11.0857	21.6598	74.3866	11.6217	2.61732	10.486	55.466	16.4517
35	49.8907	105.525	38.1314	53.6209	53.4158	47.5976	40.4159	4.93366	45.4761	28.4499	49.3913	65.9822	23.8247	15.2623	44.1349	35.5941	0.600833	19.582	32.5358	23.6444	8.29033	32.9339	4.59465	77.5281	25.4582	88.2145	43.2678	33.4995	29.8129	10.1319	-19.0484	64.0843	47.4329	12.5767	39.0327	15.177	17.9725	18.9665	2.68462	5.40432	50.7599	9.67018	20.9255	76.6385	6.40875	5.1478	13.8863	53.424	15.6081
35.1	52.284	107.363	35.3959	56.8595	49.489	47.0764	37.877	6.01675	41.6985	32.9262	44.5935	67.5445	21.9236	17.6387	44.4982	36.9287	-1.87802	20.2753	32.9512	29.4547	17.7008	32.9473	3.33843	75.4099	21.0564	87.0745	41.5558	29.9857	32.3613	12.0617	-16.3281	65.3258	51.2779	17.7597	43.484	9.75718	15.6699	25.6065	3.69903	7.55502	47.3886	10.563	19.2304	72.4331	12.3362	4.58616	13.6614	55.6043	18.9714
35.2	50.8717	97.3823	36.5475	52.2908	48.9702	48.931	40.5715	4.8627	42.2308	30.0435	40.4007	70.1699	20.7135	16.7696	38.2646	34.4038	0.549627	20.4397	31.1481	24.9253	13.2991	36.4802	3.40775	78.9425	25.3314	90.3282	37.834	28.0564	23.9764	11.7272	-12.0415	67.3631	50.9961	17.0381	40.9798	11.8081	16.3355	18.9132	1.73789	8.77621	46.3025	7.85356	22.8182	78.5257	14.7129	3.25669	13.9023	57.6184	16.9676
35.3	54.5643	98.849	40.5525	54.7133	49.3377	48.9129	38.4086	5.0459	43.4386	29.7198	43.5708	70.0117	28.5307	16.9803	51.3363	30.122	0.516952	20.9787	30.484	26.0899	13.1494	35.8931	4.05668	82.3051	21.2973	86.6858	36.9634	34.1675	29.5416	11.318	-10.2144	63.6482	50.5206	18.3177	49.3234	7.6228	16.4928	23.141	0.309	2.75483	48.1748	10.5366	23.5469	71.6746	15.7358	1.91346	14.4809	57.6376	14.218
35.4	51.4277	101.005	35.9235	53.9398	52.5478	50.4541	38.8853	5.22404	41.705	29.1908	46.6341	63.6507	22.2262	15.632	47.7245	33.7644	-0.0160686	20.8454	35.0322	26.9059	13.8991	33.6364	7.90549	81.1521	19.6834	90.5876	38.3024	36.7718	28.7087	11.9103	-22.6634	66.9705	48.2722	13.6193	51.5955	10.5295	17.6905	17.9788	2.21733	8.99326	49.1852	9.55446	23.1973	75.1682	12.259	1.98901	13.5165	59.5636	13.214
35.5	44.7004	92.0911	35.4266	50.1471	48.6596	47.1664	37.1447	-2.98681	41.0832	24.5052	48.1093	67.4608	21.4446	14.7607	43.7765	32.8412	-0.403801	17.5785	35.2267	30.9787	14.7991	30.7636	5.82637	71.0887	25.0245	86.5046	39.195	34.0241	24.6702	11.3388	-25.0056	67.0656	59.2511	16.2735	48.2811	12.189	14.9332	17.8325	1.39845	3.4107	48.6046	11.575	22.2099	73.3723	11.4546	0.519333	12.8889	53.9925	14.5793
35.6	47.0334	103.897	33.8838	46.9703	45.911	46.9139	37.7784	-4.28154	41.3726	28.0543	47.6387	60.0692	21.3159	12.5962	50.2586	31.3613	-0.705248	19.0078	34.3561	27.8717	13.9352	34.6248	3.00543	76.6287	27.9327	86.3049	35.9162	32.4432	33.3564	11.1549	-14.5473	67.9946	49.6426	14.2851	44.0192	5.46415	16.6021	24.5441	-0.183636	3.68787	45.4784	11.2309	23.1211	77.3158	11.1623	2.35758	16.8255	56.9892	19.2037
35.7	55.5733	101.646	38.2646	52.6574	52.1997	44.8724	37.208	3.75751	41.4448	27.3013	43.9571	62.0996	18.9823	13.2623	47.7855	34.0086	0.84996	14.954	34.2419	29.5197	16.1904	29.827	8.6049	78.5826	22.308	86.9935	37.7618	30.2379	33.3506	11.8567	-19.333	67.4573	55.619	15.5879	45.7862	7.34394	15.4263	21.9764	-2.80518	4.71293	44.7962	11.9594	25.3362	74.4289	11.4819	2.32689	9.89075	55.8838	17.8653
35.8	49.8456	90.7478	40.8486	53.0857	53.418	49.1352	37.9436	4.7058	39.7871	23.2265	43.4396	58.9673	19.4979	13.958	44.8776	33.6233	2.55047	16.0414	32.4003	27.3176	14.5927	29.5157	11.2183	77.059	24.8602	86.6897	37.2152	25.0434	29.8162	14.0236	-20.5467	61.4601	45.4315	15.6931	44.5344	8.39595	17.2373	20.1192	0.677694	6.78531	47.6486	10.1143	22.8719	76.3821	6.87984	5.53698	13.9327	57.6741	19.6565
35.9	41.279	92.4551	39.5251	50.5425	42.5248	47.6979	39.8533	3.28108	39.8024	20.2338	41.2686	59.4772	20.1135	17.6208	53.3099	31.6403	-2.54761	17.917	32.9187	26.2577	15.2106	37.6954	8.21815	74.0224	20.7009	88.1241	38.7025	21.2119	31.1382	12.8425	-18.9968	58.4252	49.9025	14.8975	47.7736	9.31352	15.6185	18.3046	0.2229	5.51695	46.9626	10.0077	22.5042	75.6244	12.3929	1.96155	16.2523	53.9302	16.3942
36	46.8818	97.4645	37.9381	54.1839	43.355	46.1316	42.3177	0.767686	40.1137	28.6196	43.1603	62.5967	20.3375	14.0159	52.0146	35.1803	-2.02369	18.0594	27.5609	16.4081	15.6538	27.8208	7.99317	74.7866	22.2708	86.733	37.0883	17.5415	31.6897	12.2631	-16.8244	63.3068	54.4111	17.416	54.6793	6.86225	15.7115	20.3013	-0.386099	5.83101	51.5429	12.9505	19.6752	73.7485	14.4844	3.12446	13.6224	56.2538	17.6068
36.1	43.6569	104.185	38.395	53.8316	48.5099	45.2514	40.5507	4.98042	41.3204	25.0542	39.6374	59.3556	28.8014	8.89439	45.3097	32.6854	0.991489	17.6614	31.6498	17.3672	13.6475	32.6428	9.24241	73.2576	20.883	89.834	38.3212	20.5113	30.437	10.7265	-13.0806	58.6635	53.5955	16.6192	42.8135	11.8898	15.5214	20.9926	-5.01966	6.0564	44.7488	10.5613	21.0385	76.7122	7.5419	3.05604	12.5488	56.4926	14.5955
36.2	40.3398	108.888	36.2268	46.0604	46.084	45.9645	36.588	4.89333	40.1163	23.4123	38.5675	61.5022	25.9266	12.8074	49.2135	34.2662	1.89378	17.1583	31.0852	23.3499	13.7883	35.2047	12.6629	72.9848	21.3324	85.914	32.298	26.5615	32.1337	10.5554	-19.4765	61.1974	52.0912	20.4444	57.2104	10.6669	16.3265	17.683	-0.807606	6.60838	50.0612	10.3404	22.8938	76.8226	11.6615	2.1568	12.8025	55.7113	15.1555
36.3	43.5924	101.82	35.3116	42.1602	44.6863	48.6744	39.8881	4.06466	37.691	18.6663	41.3527	64.1552	22.8322	10.5827	50.5112	31.745	-0.365979	12.7141	28.3505	22.9177	15.2718	38.1814	8.38771	73.0595	24.6709	84.1175	34.1622	27.3618	36.5757	11.179	-19.0139	60.5891	50.0161	16.4787	40.4786	13.6662	16.9073	19.9049	0.788502	6.53859	45.8863	15.6721	20.8081	74.5185	7.29417	2.82382	13.6534	52.4839	16.101
36.4	43.3013	99.7237	35.1008	44.388	42.1904	47.2422	40.7693	2.60322	37.0729	16.4466	37.7548	59.3377	28.3445	7.44259	48.4346	33.8465	-1.25185	13.2977	28.8423	15.2531	13.0151	37.5822	6.06128	78.8247	24.844	86.8382	37.4096	31.6366	26.9019	12.0298	-21.4345	61.9543	45.8945	17.3438	42.6569	14.3893	15.588	19.5614	-3.26705	8.7092	46.1977	13.9488	20.9207	77.3368	10.6758	2.50834	14.2712	57.6067	19.1345
36.5	39.3954	100.817	33.2524	46.9762	45.8892	44.0512	39.3409	3.19492	37.3328	21.7275	40.637	52.087	24.8025	6.21822	50.4812	35.881	-0.300325	15.9987	30.5614	10.4931	14.2303	37.1571	9.28448	74.2294	22.3589	84.1355	33.0798	26.5391	35.2299	11.2657	-22.7318	64.1437	46.6361	19.3195	41.6696	15.8224	17.3111	15.4481	-10.9249	7.44611	44.5232	11.9225	23.5165	76.1724	13.062	3.78154	12.4939	57.693	20.2147
36.6	44.5066	103.65	34.625	49.3878	39.9414	43.7601	38.1836	4.94816	32.1211	20.7765	42.1738	59.1439	26.3291	10.0369	52.7246	34.92	-0.472281	12.2779	33.6766	12.1421	17.5728	38.341	9.38518	71.6772	24.904	83.303	37.4657	36.8832	30.9791	12.3642	-21.0993	59.2892	42.873	17.6806	48.4079	13.4283	13.9857	18.7038	-4.97702	9.30978	46.9068	11.5462	24.5832	77.9685	8.06247	4.42686	12.8414	53.6652	18.5355
36.7	41.4729	96.3261	37.4354	41.907	44.6515	43.7834	40.55	2.11233	33.6971	22.5909	39.8531	59.2471	27.3088	10.593	46.2487	33.0078	-0.387654	17.7534	30.3247	21.6242	12.3371	32.9529	4.05548	75.4953	24.508	83.7025	36.5255	28.1173	32.5196	11.2845	-19.546	54.8296	45.0178	14.9244	38.2659	10.6283	15.5777	18.3535	-0.00233778	4.79738	48.0436	9.29439	21.3372	79.9475	7.87473	2.69936	15.283	57.1282	16.3273
36.8	48.0967	99.6566	32.7215	44.9563	41.2707	44.7737	38.3939	1.33592	35.7055	22.3039	38.5331	56.2432	25.9381	13.8246	51.2412	36.7488	2.46203	15.8642	32.8392	18.1278	13.8891	30.6786	11.9535	72.3198	26.0916	82.7205	36.466	27.3402	27.1623	11.7812	-14.5028	62.9113	46.0536	18.3876	52.023	13.3296	14.938	16.3939	-2.66173	8.44848	45.5441	11.5443	23.4848	73.9149	9.13216	3.95672	14.2363	53.2884	16.3468
36.9	41.1323	94.0666	36.0342	42.6257	41.6223	44.8185	39.1075	2.38533	32.4407	22.0043	41.025	56.4141	23.3857	12.4674	45.8907	36.2928	1.80428	17.6957	35.4695	17.6529	10.2091	37.187	12.5801	69.3529	22.5408	83.1631	33.9615	27.9527	29.9589	10.2971	-11.176	60.9089	44.2476	13.6882	46.2707	14.0287	15.1078	21.0295	-4.5129	9.21119	45.3308	10.3557	27.1527	79.6159	10.3307	3.73826	14.7979	54.1475	15.6415
37	49.6181	110.431	29.0174	41.2372	41.6774	45.9895	38.0634	4.27986	33.0249	25.3435	41.9662	57.1815	25.9619	8.12178	50.5774	33.0886	1.43538	17.3257	31.3565	18.4066	7.95931	31.7909	8.53758	76.0889	28.4639	85.0584	37.5189	33.8353	30.6457	9.96082	-12.4159	57.4036	52.7447	11.6181	47.3995	12.6391	13.6483	13.1597	-3.4356	8.26491	44.9851	13.1547	21.8709	79.0041	4.12386	3.58114	14.4428	54.6029	14.183
37.1	43.3474	105.083	30.7386	42.3361	40.6517	45.0849	37.7998	3.60414	35.9416	28.4522	37.2206	60.0657	24.8702	12.7317	53.1079	32.9466	2.73473	18.3329	30.9729	16.8275	14.7667	35.1216	8.34292	76.5417	26.9957	85.2871	32.8047	27.638	31.8089	10.582	-7.81722	53.2513	49.6126	19.4757	42.534	12.9033	11.5589	18.0324	-2.13311	5.43569	47.0545	9.852	23.4575	78.3495	9.26245	2.94063	12.9555	52.7093	19.4159
37.2	43.2991	98.0197	34.6418	43.0175	44.6771	43.3139	40.881	4.15075	32.4725	24.8032	40.4812	58.7409	27.7791	13.904	52.1233	29.3691	1.67272	13.7804	33.0002	19.0109	13.4246	38.6265	0.248836	72.6239	20.2935	83.9892	34.4694	27.974	30.7406	11.897	-4.21172	56.8374	40.5928	15.7142	38.826	13.4645	13.6761	22.1631	-0.887935	7.58265	44.8042	4.36586	22.7517	77.0242	9.2799	3.72255	13.3937	53.7638	16.2781
37.3	38.6969	100.661	29.7399	44.9588	42.0874	44.6529	40.8191	2.55628	37.6214	23.8478	41.4163	57.2645	27.199	13.0934	53.3662	35.8509	4.62846	10.3243	31.9167	17.2052	12.9101	29.0886	12.0228	81.1041	23.6169	81.7267	35.7223	31.0324	28.8474	11.3208	-9.14444	64.4117	38.0729	19.9945	50.4038	12.1272	12.8828	18.7265	-3.29667	7.9869	45.6906	11.4085	20.9649	77.2512	9.68927	6.34287	16.7496	57.0591	15.2316
37.4	43.0534	96.8989	30.9407	43.4215	38.9637	42.3938	35.7061	3.26933	34.7431	24.7275	41.3587	53.5252	27.9864	9.55136	48.5093	33.0606	0.854394	14.528	31.4142	12.4411	11.5225	35.6123	8.20258	72.1712	21.1056	83.8382	36.3898	32.3111	29.724	9.8987	-8.6929	54.9312	46.2962	12.0522	53.014	14.8192	14.6618	14.1566	-2.91421	7.56971	47.9279	4.37332	21.6768	77.1945	11.709	5.38565	13.5277	57.7807	19.8706
37.5	49.1451	97.4181	23.5149	38.7791	40.1922	44.4499	39.3049	3.18407	35.2171	22.1084	39.5647	50.6318	32.8881	8.72169	47.9505	33.2071	-0.308769	16.8211	32.5067	10.5571	12.5318	30.6147	13.3057	78.8571	25.8935	78.9194	35.2964	20.782	26.9499	9.55821	-12.5001	57.2443	34.9375	14.5954	40.941	11.2078	16.3444	15.0628	-2.49814	5.47577	46.3572	6.24757	22.0407	74.65	5.48078	7.90192	13.3645	56.9231	16.921
37.6	46.1314	94.7274	26.9044	41.4196	43.1611	42.3206	32.9932	2.78799	32.2998	27.5172	39.6971	54.0313	24.976	9.28631	49.0205	32.7618	-3.74239	14.2605	31.651	19.5056	14.3907	41.1352	12.5998	81.3169	24.7807	82.0684	34.6555	30.7305	29.8051	9.70121	-5.57082	56.1858	42.3372	13.5011	34.5289	9.64462	14.5534	19.7268	-0.0951306	6.28658	45.3329	5.21654	22.2576	78.1598	6.07404	5.44157	14.0778	53.7349	18.8801
37.7	40.3975	99.1383	33.3499	46.2875	45.9013	43.3897	34.8135	2.80636	33.5987	27.2589	41.0614	51.7114	21.7257	10.6503	42.3028	31.7864	-1.85825	16.8847	32.1486	14.987	11.1902	27.977	7.41873	70.031	27.5667	80.4247	36.8678	34.4985	24.6506	10.3162	-4.3027	54.3735	39.3979	15.2796	35.7611	13.4224	13.7711	24.0683	-0.039537	6.06922	43.9236	4.24824	21.4385	76.4801	5.60894	5.44898	14.1771	55.1766	20.529
37.8	45.926	103.839	33.2123	36.1787	44.3097	41.6752	36.3755	3.59794	36.0828	19.5325	37.5316	49.9282	27.1782	9.45382	42.8855	34.1359	-1.41923	16.3773	29.0499	11.0969	13.2008	31.17	9.77239	75.2626	24.2972	81.7777	34.274	28.4192	33.9992	10.2573	-4.04262	61.1995	39.7077	12.6864	39.1059	16.3211	15.5887	19.1396	0.706102	5.26509	44.07	9.75759	26.6273	78.1875	8.84021	3.11077	14.5709	52.9002	23.0818
37.9	39.025	101.942	30.6476	40.6892	44.7261	39.763	33.8485	4.99763	31.9317	22.0617	36.9997	54.599	28.0981	8.81467	43.9281	33.8259	0.371956	15.5766	32.1542	8.98793	11.3796	32.6525	8.08499	74.7107	27.5542	79.5112	34.606	28.1126	31.1701	9.79811	-4.52438	53.7782	44.417	15.3292	35.477	16.2341	15.4969	18.5156	-0.182666	4.90883	43.2473	5.63508	21.1016	74.8489	10.1888	4.02589	14.5222	51.9716	21.0387
38	46.0247	106.225	36.5797	45.3955	43.2034	42.3698	36.6351	1.6648	37.0888	21.6085	39.3402	53.0629	30.4605	9.38218	34.7074	33.2977	-2.03906	16.7249	32.3844	13.8889	13.2931	32.5703	11.7431	68.6188	27.4008	82.3779	36.7615	25.5241	25.6541	9.03714	-4.30424	57.3145	37.8579	16.7848	38.7362	16.7975	15.9876	18.836	-2.56997	5.45806	43.0117	7.59467	22.1379	74.0159	4.31862	4.46344	15.3199	54.8504	24.5919
38.1	43.0149	94.0275	32.3647	38.8205	40.1274	41.753	31.8486	2.79582	37.0355	21.4882	38.2601	50.4559	29.73	9.23458	43.0024	34.8191	-1.60621	18.0388	32.0145	15.826	10.9455	36.9719	9.74698	68.7328	23.1402	79.9283	36.5375	25.1098	25.0954	10.1319	-8.49681	57.3754	39.4503	14.583	42.2529	13.5809	14.2154	14.9877	-2.87097	3.86435	43.4133	10.8251	22.1979	72.9128	6.6444	2.17222	15.7402	53.2221	15.514
38.2	42.6105	98.074	33.1582	35.913	44.0736	39.5409	33.7265	2.91892	35.4014	25.0102	42.8874	53.2127	19.2979	9.39623	43.4662	35.4467	0.119725	16.4217	31.7187	13.9873	13.5526	31.8821	3.77374	76.7301	28.4099	78.8167	34.0633	25.2858	21.6939	12.0376	-7.14254	53.0948	41.4124	13.7944	47.8468	13.329	13.9282	17.1148	-0.417904	5.44972	43.8305	6.61187	21.8041	76.1476	7.67301	2.46517	13.5937	55.9136	20.0675
38.3	41.8423	96.7782	22.74	39.1874	40.8228	38.5824	34.2407	3.58478	35.7809	19.801	38.9982	48.509	32.368	13.992	44.938	35.168	0.344149	15.0814	32.5704	15.8815	10.4726	31.8596	5.0072	72.6433	21.7791	80.8459	34.1551	19.146	26.6272	7.84985	-3.8624	59.9044	34.2516	15.5557	39.3606	6.2117	14.654	21.4687	-4.35705	7.26888	48.7723	6.20187	24.9667	75.8671	9.40988	6.34369	14.3023	55.0619	19.679
38.4	39.6219	105.437	30.875	41.8925	39.0185	40.0943	34.5697	4.17678	32.7201	25.5972	40.7402	46.8696	31.0223	7.07824	30.7756	31.4909	-2.3869	13.4942	29.6054	13.8316	12.7327	31.2438	9.70292	68.1175	25.7997	80.6439	33.7522	23.5502	25.3445	10.11	11.1766	57.8446	39.0893	16.8359	34.0151	16.5459	15.5753	20.5844	0.348326	10.5642	42.3771	5.28287	21.5897	77.4538	7.46174	6.23526	13.9415	54.3638	17.3707
38.5	33.4068	99.5969	32.2634	40.5573	43.072	41.6293	35.0178	1.07818	32.7647	20.2799	39.3958	46.6504	27.6791	11.2191	49.3065	33.5425	1.24733	15.3511	31.5933	8.53435	13.1399	30.8449	8.21705	69.8489	22.2796	83.6718	33.9293	19.7308	25.1731	10.9836	14.4168	58.839	36.2517	15.7606	37.8713	14.3395	15.1261	20.2331	-1.32773	9.17822	44.652	11.0827	22.3787	76.7764	8.27662	7.22223	18.3133	56.016	16.3503
38.6	42.7346	99.8099	28.1886	45.4684	36.9674	40.3681	33.1752	0.89422	35.2679	24.0714	37.9171	50.3808	26.0893	9.65553	44.1701	34.3185	-0.187688	16.5687	33.9686	17.498	11.8335	31.0728	5.71342	74.9015	24.2363	80.4971	34.7471	25.1648	23.6741	8.83176	14.3194	58.9191	43.0186	14.6965	41.1654	13.8812	15.3249	19.49	-2.23961	7.34314	45.7711	7.23563	20.9779	77.2548	6.76602	3.7267	14.5234	51.2833	16.8678
38.7	50.8824	97.1168	32.0126	42.2586	37.8613	39.1735	35.1938	1.8282	30.619	26.071	39.6015	49.0608	21.6312	10.5369	47.6893	33.1048	-3.30398	11.0232	29.1273	8.00796	12.4861	34.4647	7.97828	72.0962	26.598	80.5529	34.3834	31.7171	26.7796	8.8003	15.5221	52.8597	47.5692	17.7904	41.4572	12.5068	14.1697	20.2456	-2.75112	7.14989	46.007	7.47079	25.2486	79.812	7.87732	7.42661	12.2589	51.672	18.2056
38.8	46.3459	95.029	33.8254	32.1873	34.3281	35.9798	34.3968	2.65859	32.1089	22.7976	40.5634	43.1827	21.052	12.6138	46.4702	34.2245	-3.10854	13.8062	29.7698	16.6251	14.6575	24.9304	12.3146	72.8506	22.3978	81.4491	33.8514	31.1583	21.1414	6.84603	12.2724	59.5743	45.1469	14.7319	37.2776	8.60555	16.5461	18.6541	-2.9817	6.57166	43.6263	7.06018	24.3763	73.5814	2.25286	4.86054	15.1334	51.8644	18.4895
38.9	45.2908	96.9973	23.3445	40.7691	37.0879	38.4765	35.9102	1.70383	34.1099	25.8014	38.2884	48.535	19.9642	14.065	48.6902	29.3195	-0.515956	13.9648	31.0413	19.8086	12.8097	31.821	12.38	61.5763	21.5659	79.5442	33.7649	21.3394	24.2381	7.09227	11.0986	57.3906	35.7948	16.1721	34.2391	13.4613	15.0932	15.8025	-0.823925	7.52321	40.4289	8.54966	25.3997	78.4949	9.98675	0.844189	17.0772	51.289	17.4258
39	40.6509	91.5931	26.6017	39.881	35.6085	37.9953	36.5415	1.71937	34.1962	25.676	36.3034	46.2386	27.0329	13.3534	47.8567	29.7314	-2.73442	13.5307	27.8663	14.3994	16.0546	26.1893	3.26856	59.8	26.3927	79.0773	32.5291	22.5842	22.2466	6.53664	10.2362	46.1812	40.6491	15.744	34.4658	13.812	14.3368	18.6289	-6.40247	7.54784	44.1493	8.68706	23.0545	77.2543	6.07293	3.07	12.4518	49.0633	13.7001
39.1	44.2697	100.186	22.2475	42.9396	40.3969	37.781	33.8058	2.14745	30.239	24.6213	37.0832	50.2425	22.3594	14.0579	54.3355	34.1614	0.315216	15.5089	30.8321	14.7673	12.8718	30.6769	9.39019	66.1617	22.7685	81.942	35.0019	23.2101	30.2704	7.11476	13.9077	56.083	35.512	12.4948	35.8762	10.4568	15.754	14.2684	-2.8469	8.17221	42.1741	8.39808	24.2095	71.7005	8.05086	6.58793	14.2568	49.2981	17.3391
39.2	42.3354	93.9964	33.0244	36.2709	37.3144	38.1013	33.1723	4.24932	31.9698	23.8328	35.8269	50.8854	20.3636	12.3006	47.1374	33.3353	-1.79654	12.5184	30.2329	18.4577	12.1239	24.1508	6.08442	66.7952	20.4234	78.3252	31.8043	27.389	23.1836	5.98637	10.0439	49.459	34.7367	15.9564	27.6463	11.2073	15.0064	19.7513	-0.0411563	3.65695	45.6461	5.75551	26.9769	73.5886	10.5378	4.23881	17.2684	48.4928	16.8961
39.3	45.5432	101.14	27.8642	38.4643	36.0825	37.514	34.5833	2.64454	32.5917	22.8587	39.3943	52.9948	20.0225	11.3464	49.3575	30.5223	-0.157031	15.8651	30.3199	13.608	13.3633	33.6139	1.15273	70.1275	23.6144	79.3739	32.7387	31.9068	21.6312	7.78311	11.6049	51.3198	33.9609	16.498	26.5673	13.4816	14.6567	19.7739	-2.42475	9.12723	44.9637	1.10553	24.1835	73.5319	7.96997	7.75527	16.915	47.3859	15.7951
39.4	43.7724	88.2984	32.6473	42.7606	33.718	36.4684	34.5749	1.83456	30.0981	24.0962	36.9049	46.7478	20.7766	13.5628	47.032	27.7058	-0.829222	16.0598	30.4793	10.0096	11.62	33.3304	2.77765	70.5092	22.3571	75.5856	32.9326	30.0698	25.0591	8.29769	4.94717	51.8287	43.8048	14.931	25.6282	9.528	15.3894	23.5985	-2.01293	8.25098	40.9545	8.05923	22.0805	72.4737	10.6418	6.09461	14.6729	50.299	17.3384
39.5	44.4532	89.317	28.0825	41.302	35.1295	34.5619	32.8961	1.30017	33.879	25.2442	37.8678	49.472	26.4475	10.5017	54.6231	32.1748	-0.0189953	14.4639	35.9803	16.749	10.9523	25.1152	2.23702	71.3812	21.3967	72.2694	31.2317	27.1963	21.133	7.09501	8.26001	54.8009	34.3005	17.2559	30.126	12.4373	9.49085	22.0968	1.47025	6.30899	38.071	7.78203	25.4845	76.7098	8.91085	5.99262	15.7869	50.882	16.0834
39.6	42.2789	97.0562	24.1287	31.6283	31.4522	38.1819	30.2919	2.81477	30.7961	23.0789	36.7778	51.4509	23.7949	9.2829	49.0127	35.0686	-1.41912	16.6177	29.5165	7.55609	12.5172	26.9875	9.86425	67.7395	23.9763	75.1602	33.2326	29.0921	18.7617	9.75394	12.1668	59.334	31.2183	14.0328	32.7332	11.7264	14.0674	25.1981	-1.3517	5.96179	38.7968	4.89982	27.5421	78.0319	5.74617	7.05547	12.4817	51.2091	15.9906
39.7	50.3506	94.1806	27.5903	41.402	33.1352	37.4416	33.89	1.78514	32.6968	24.3736	35.8666	43.736	23.755	9.49091	49.8693	33.5515	-0.0616394	15.0549	30.8607	12.668	14.3638	28.6538	8.70281	66.2859	18.6889	80.0119	32.5756	37.5164	24.1965	7.55728	13.2545	54.995	42.3892	11.8618	28.2395	8.51007	12.6703	22.7228	-1.52796	8.36315	41.8852	0.73245	26.4624	80.0932	9.36799	2.41235	13.5718	50.1188	18.2485
39.8	39.6078	95.5939	29.5857	38.3306	33.9935	36.1337	30.3636	2.09544	32.6218	21.941	38.1865	44.1373	23.049	12.8687	55.4287	33.8573	-2.47152	16.192	26.8179	9.48017	13.0616	35.2713	6.9641	66.245	26.3642	78.36	32.2585	35.1451	24.035	7.97818	15.0647	56.2351	35.6451	13.8207	33.5231	11.727	13.2044	21.9342	1.27244	4.17295	38.8081	3.2218	26.3656	79.0702	6.79629	5.01423	12.9839	50.3675	17.255
39.9	48.2949	99.097	33.0395	52.1492	35.4254	40.492	32.0455	-0.730825	34.3647	23.3291	37.3487	46.3261	23.2749	9.33663	48.4707	34.2414	-0.301817	15.8349	27.5549	3.22824	9.93105	35.6053	5.42566	63.4116	24.739	77.856	33.6111	25.3158	30.8072	7.22853	13.9048	52.4793	34.4113	13.378	34.8709	7.3724	14.2778	21.6721	-2.46783	4.14979	42.2275	3.79841	27.3834	76.6033	6.80245	6.50772	14.6341	48.1787	17.2884
40	49.3787	97.3309	32.6811	34.9691	34.1764	37.3166	31.9334	1.65122	32.5266	24.1871	38.3342	45.3326	30.1039	3.72353	53.8944	30.5132	3.84246	15.0763	33.8399	12.1429	14.34	30.2317	5.92757	66.6817	28.0829	77.8666	31.2959	31.2122	26.8652	8.05332	12.6571	51.4117	29.9607	14.7501	31.2402	11.1601	12.7033	22.6086	-0.393523	4.98682	41.4576	6.47914	25.2357	76.9604	9.73705	7.73896	15.6857	51.1692	18.7068
40.1	48.639	100.747	29.2606	30.0084	38.6442	34.2362	34.5787	3.00131	30.7955	24.6695	37.334	51.8244	23.8515	8.12844	58.1924	35.7725	1.395	13.4244	33.5648	3.73861	11.9576	30.8612	7.14252	67.55	23.5148	77.735	33.4271	27.0473	17.8637	7.18605	8.89559	50.9739	37.4801	12.2264	33.6883	12.6431	14.0805	19.3143	-0.870738	7.35988	42.8142	4.49095	26.0807	73.3365	8.22635	4.60741	15.9405	48.9701	17.905
40.2	42.4805	89.9462	35.3589	32.6775	32.961	35.9463	30.1127	3.45803	32.3741	25.7355	34.9189	48.9453	22.4085	11.091	60.4075	30.9763	-0.700426	16.2419	27.4767	3.34591	12.6956	23.7449	8.12575	65.3235	24.1876	73.3263	30.1649	33.9059	23.7914	7.73135	10.8579	52.3288	36.6562	13.9023	34.326	15.1709	12.0123	20.9489	-0.182906	5.64908	38.8984	1.91399	25.7179	74.3352	9.85525	3.71219	12.1608	51.6293	19.6968
40.3	39.7403	93.7698	33.5643	37.8381	38.93	31.7188	29.444	1.81412	29.9735	24.1508	36.7146	50.4717	19.2577	11.1323	54.7604	27.2052	-0.598654	15.9225	32.7917	13.7098	2.9219	28.4931	6.94291	61.4371	24.0292	78.0877	32.0526	23.5574	25.2089	8.53545	11.5235	53.1758	32.6731	13.1462	29.2471	15.9745	12.899	18.8315	0.211275	6.64218	36.4816	1.25743	26.5792	72.8701	9.56946	6.15269	16.237	51.4929	23.6718
40.4	40.8871	96.2577	28.711	36.1039	35.0436	35.4185	32.1569	-14.0193	31.1605	24.6883	38.6775	45.2519	20.3929	12.8562	56.5372	31.7994	0.196073	15.0177	30.8187	13.6735	9.04305	29.4647	4.59998	65.3816	26.9975	79.6013	30.8889	27.9467	26.7452	6.69065	17.0181	44.5254	34.5889	14.7987	33.4655	13.9422	13.8996	17.5711	-0.460338	7.04441	43.2229	5.24963	28.3246	79.2965	5.20109	6.7469	14.7294	53.2657	18.9114
40.5	32.5082	99.7975	21.374	34.3022	34.1458	38.1235	33.9897	-15.951	33.9083	22.3874	34.9855	47.7758	19.8717	11.4623	52.4069	27.685	1.28303	17.6765	31.6462	16.5075	9.36421	25.1232	7.65212	62.9648	19.7471	79.4792	24.7215	30.4796	23.1519	8.26906	13.7409	51.0805	40.7397	11.9194	21.672	13.0591	12.1098	19.335	-0.878344	10.4601	36.2848	7.13224	24.9332	78.6353	3.89259	6.51381	14.6378	48.4	16.2207
40.6	34.2487	103.035	20.5837	38.4686	28.7955	34.864	30.3199	-13.1056	30.8885	21.0406	38.5964	43.2632	28.0819	12.1398	58.4917	33.7298	0.906953	15.7434	34.731	7.29959	12.2034	27.3249	8.7439	65.5238	26.242	78.1412	31.2829	23.648	27.2617	7.33095	6.74476	56.2749	34.191	14.7725	25.0441	12.7598	5.6846	19.7197	0.188887	9.68714	39.6829	3.28391	26.1488	81.2679	0.819623	6.96136	17.0553	48.7277	16.8486
40.7	39.0285	89.5896	24.0102	33.7313	36.7578	34.2189	35.5043	-14.6869	28.8759	18.5195	36.6415	45.2373	25.2139	12.3275	59.0791	29.2244	-3.49457	16.0838	30.8759	7.82852	8.00542	26.681	6.87287	62.147	24.1284	74.9394	30.6058	21.6896	25.7842	8.46628	13.463	46.5425	30.602	17.0476	32.2724	8.74958	13.3085	24.1237	-4.40965	7.78939	41.7788	6.6915	29.5744	78.7464	8.20927	4.63738	15.8573	51.433	13.1591
40.8	38.6797	100.334	26.3017	33.5016	33.3642	33.4116	30.5807	-18.0075	30.5206	19.7175	35.9427	48.9204	29.5711	10.6722	56.8767	29.0933	-1.2659	14.864	31.7837	3.41303	10.796	26.9605	1.71152	54.4869	26.4213	76.9581	28.1871	25.9267	21.9774	5.72689	12.4917	50.2274	33.1273	14.6656	35.807	14.4642	10.1872	18.1993	-3.7014	7.63556	38.7099	3.64885	27.1899	79.4168	7.14916	6.20517	16.1798	49.9978	18.7256
40.9	33.8552	106.81	28.3679	28.115	37.7248	31.4899	29.8695	-17.1384	31.4826	23.9481	35.3151	50.9771	30.4223	12.5339	48.8753	28.8201	0.216883	16.6042	30.9573	6.9476	12.0853	22.8088	9.27083	51.8994	24.6158	78.0492	30.0582	27.2094	22.964	8.53006	10.9326	48.995	28.6394	15.4298	29.3364	13.4623	11.6144	19.3861	-1.09038	8.98449	37.195	8.19321	26.0884	80.2875	12.1091	5.58285	16.1522	51.3217	20.1706
41	29.5041	98.4859	24.6829	33.8158	34.272	31.7834	31.1647	-14.5885	29.9095	17.1204	36.1176	49.0404	29.91	11.7189	53.6649	27.2551	0.100211	14.6995	29.7028	-0.376833	7.30127	29.3332	12.2704	53.9572	20.3836	77.3377	34.7422	22.6962	15.0815	7.34866	10.2707	45.2363	33.3027	10.4211	33.86	10.2404	12.6677	18.6078	0.136008	3.63842	38.9968	2.78105	26.477	79.9694	11.9069	6.33667	15.5472	51.086	22.3397
41.1	38.169	104.558	19.7267	35.0585	37.2418	28.4825	27.4734	-8.45357	32.9777	17.8808	35.9135	48.9586	22.5741	11.385	51.7045	24.2791	-1.06771	15.7568	29.3226	4.98763	11.8616	24.6509	4.46653	52.5307	25.3673	74.6477	28.6256	27.7103	21.6333	9.40924	10.7857	45.8327	34.0657	9.9355	33.8178	10.6382	11.0116	24.1999	-2.16802	2.69323	41.4185	2.90985	30.5613	80.1719	9.91667	3.37536	17.2195	53.4869	20.9697
41.2	43.2801	89.5063	27.1746	28.9666	33.6859	30.4181	31.8168	-6.5032	29.7043	22.1373	36.0914	43.8244	22.9052	14.6644	45.5918	27.8133	-4.54609	14.5774	31.081	2.24791	10.7148	23.5539	8.45191	66.2768	27.7327	71.5258	31.9458	34.8	24.2554	10.4834	9.82062	47.8	30.1908	18.7342	35.4108	7.43747	13.5498	19.7906	0.576695	7.39301	36.7743	3.12314	28.796	77.6564	7.50639	8.29929	15.1046	52.4524	19.1935
41.3	41.0213	103.756	19.4249	30.6482	35.0727	33.4631	28.2771	-13.3229	30.8472	18.3444	35.2829	48.711	27.6139	15.0554	46.0414	29.1809	1.56887	13.9282	29.9913	5.5199	13.9433	28.0588	5.9768	54.0036	24.2533	73.2167	32.5736	31.752	20.2445	9.02564	11.9762	49.0452	36.6964	12.4329	41.6993	8.53035	14.3071	20.0822	-1.41281	4.1692	36.8569	2.10683	25.2166	79.2957	8.11169	7.11381	15.3659	51.7274	24.1631
41.4	41.8846	107.684	20.1079	37.5495	35.2011	32.4412	31.37	-8.35001	30.0472	21.0358	31.3188	48.5632	27.7841	13.4491	54.4364	30.8906	-0.898374	13.8941	31.1035	1.59699	7.94408	21.705	7.8052	51.5062	25.1876	74.8868	32.079	27.9835	19.6631	8.70635	13.7386	52.1225	36.7967	12.7993	42.135	11.6312	12.1305	16.7783	-0.417231	4.8921	37.0281	1.16502	27.7125	77.8167	7.2191	5.57972	16.5612	50.8098	20.3711
41.5	33.0548	99.1353	14.124	34.5796	29.7366	30.4455	29.4304	3.28086	28.1552	21.647	33.4638	47.8523	30.4722	9.7202	59.0293	30.8926	-0.56442	14.8129	31.1837	7.8809	14.0465	27.4849	5.16339	53.1982	24.9714	72.1925	26.8885	20.9556	23.0862	8.47187	10.4094	48.0879	30.0204	14.2317	31.9892	7.77872	10.0825	16.2448	-3.05045	5.31405	38.2389	6.10013	29.276	79.6299	7.67667	7.79706	13.2657	52.4482	18.1534
41.6	37.989	100.104	13.207	31.6674	38.9292	30.6133	27.5471	2.53908	32.6395	16.6029	37.7377	45.4604	31.32	13.7804	46.5096	29.1051	0.583408	13.5124	30.8798	4.47952	16.7949	22.7171	3.72542	55.1403	21.0152	73.9983	29.9553	24.1684	18.2885	8.74471	10.0227	45.8754	32.4742	13.2401	34.7175	10.0126	7.0585	17.9902	-2.68678	5.30892	37.5055	5.28171	29.6668	75.3372	7.00687	4.94653	17.1496	51.7801	21.7333
41.7	40.1013	106.551	12.9987	32.9462	35.0235	33.1893	28.373	2.11124	29.1821	20.6865	37.5924	47.418	31.4454	11.3633	48.1413	29.9666	0.300951	11.4571	28.8236	9.74033	16.3787	28.793	5.10355	47.2423	22.7696	76.4733	28.7939	24.2992	27.0558	9.06442	11.9778	51.8508	36.9083	12.6174	33.6344	11.5749	6.40465	20.2487	-0.730482	4.10185	33.3624	4.50884	27.2804	80.4444	6.8817	6.68528	13.7365	51.5663	18.2629
41.8	34.65	92.6934	15.7111	27.6556	30.9046	28.5515	26.1031	3.73533	29.3836	19.7701	35.3164	46.4389	25.0413	6.35702	40.3934	32.4209	-5.69269	14.0484	29.4077	4.21244	16.5379	26.1725	7.92194	49.4954	19.6746	77.2328	28.5649	13.0058	22.5365	9.17144	14.2793	50.2616	35.847	12.8847	31.0739	13.8622	11.116	19.7787	-3.34929	1.37783	34.4839	5.4589	27.6171	79.8861	4.76409	6.07658	12.8684	52.5026	19.9932
41.9	39.219	95.3122	23.3131	36.0478	29.1916	30.3939	29.7403	3.31231	28.9494	19.5114	30.7872	47.7926	24.5621	10.5688	41.642	28.452	-2.66894	15.492	30.3308	4.08518	14.306	21.0988	3.11961	48.1603	23.6522	74.3051	27.6349	23.0942	19.5694	8.48089	12.8904	43.7393	34.2996	16.1176	25.9977	9.53073	9.59041	17.497	0.534305	7.93396	35.4036	6.47157	25.1995	77.1647	6.74526	3.66799	14.5409	56.3412	18.4177
42	39.8684	100.361	14.9485	28.8278	30.932	28.2296	24.281	2.87723	27.2878	22.5424	32.6005	43.9529	28.5215	11.3224	42.2644	29.8414	1.20734	14.6316	29.4539	-1.11366	16.4126	23.7763	4.99713	49.6109	25.4412	73.7614	30.9267	25.5169	21.5278	8.47183	14.1608	50.3572	36.7549	13.5901	25.5833	9.0429	7.8544	17.7842	-0.349344	4.81105	39.3162	3.64936	27.6839	76.2127	2.26981	6.31363	14.3902	49.783	18.0485
42.1	36.1397	98.0359	16.21	35.9786	31.3025	28.6765	25.5771	0.304306	28.7831	21.9677	37.1577	46.1312	23.4067	6.85164	37.8675	30.2682	-3.5355	14.3568	30.5141	-0.246457	13.6152	17.2306	5.57683	49.2015	25.2859	72.3435	29.2712	25.2787	25.4899	9.16228	10.1589	43.993	33.2674	16.5148	21.4684	8.20273	11.7505	20.1721	1.20071	2.00096	39.1471	3.67265	27.4006	75.969	5.2659	6.8025	13.4665	56.6224	18.3319
42.2	43.0647	100.898	6.07568	29.9871	31.5156	28.9881	26.1605	1.3363	28.319	19.3773	37.8811	44.8771	27.5706	13.6839	50.8135	34.3146	-2.97316	14.5881	29.7753	9.95458	16.2582	25.4576	4.06215	47.2143	23.8625	75.9032	29.5995	28.3125	22.2139	9.19715	11.0362	50.5243	34.8653	12.9721	33.654	14.4089	11.561	18.174	-1.60884	5.90079	34.7499	3.05004	26.8864	80.6107	1.05065	4.31846	14.1457	53.0819	20.7657
42.3	37.3371	102.999	17.4599	37.1949	25.6922	30.2647	30.4654	1.47658	28.3033	20.9407	36.2439	43.9996	22.9883	7.873	46.8069	34.5534	-4.23066	16.7988	25.0061	4.6052	13.9699	18.6268	2.45808	45.5685	24.6929	71.1993	28.047	27.958	23.7787	7.73748	16.3136	45.9358	31.6404	10.2187	33.2029	9.87368	8.33137	16.9629	-2.2841	8.10081	37.5021	3.54776	25.291	81.7885	0.838053	7.32918	14.6601	57.3817	19.4372
42.4	44.3778	103.938	14.5017	32.7662	34.352	30.7478	30.0693	2.20159	25.3143	21.5132	32.863	47.8185	27.0889	8.52781	39.7976	29.9353	-4.19276	14.6577	28.6375	-1.80463	12.8687	24.9807	2.68341	47.5467	25.0717	73.0701	29.404	32.4619	21.2986	9.13616	14.1859	49.2893	31.9174	14.9392	34.3776	11.099	9.55875	17.6601	-2.16098	7.37536	31.3705	4.04341	26.16	79.9995	4.17607	6.91891	15.4661	53.2048	21.3029
42.5	33.2397	100.477	18.7829	32.6258	34.3611	27.7101	31.3383	2.2447	29.7021	20.9712	33.6203	49.8816	21.3657	9.69276	49.2643	29.9069	-5.12018	15.0749	27.1128	4.48664	13.9719	18.4717	8.79296	55.2447	24.7774	70.4265	27.3096	31.9059	19.6204	8.42125	14.2167	55.8077	33.8012	12.927	25.929	11.4398	10.4091	15.858	-1.12559	8.09472	36.3208	5.32223	30.6294	76.68	-0.079496	4.71612	15.1156	56.5777	17.8361
42.6	43.7945	99.687	21.3418	29.7575	29.3294	25.637	26.3108	1.78181	27.2608	19.6527	34.2903	42.2984	24.2771	6.03475	49.7672	31.5775	-5.20488	14.6367	28.9853	6.2623	11.5249	24.4925	3.06103	53.9376	24.4627	71.1284	28.429	27.2946	21.449	6.68966	17.3729	43.0246	32.7101	13.1554	34.633	11.6493	7.19414	16.7108	-2.37834	8.25063	33.8284	5.00108	30.9729	81.3118	4.69266	6.03152	14.0366	54.0994	17.885
42.7	31.7033	102.131	25.492	29.7059	31.5611	25.3891	28.9913	2.52929	29.19	18.8293	29.2751	44.3226	21.7847	6.93751	50.7809	29.3817	0.165292	14.9575	30.8311	6.22358	17.3213	23.7522	3.2517	49.2074	26.0375	69.991	29.9857	28.5364	20.6309	6.72986	11.1221	43.3653	27.7546	17.5436	30.4056	12.1217	6.20449	13.4581	-0.62689	7.86279	37.8459	-1.04157	30.0934	83.6435	1.52954	5.56789	12.2469	53.4177	20.9123
42.8	39.8338	92.7585	23.8608	31.0221	35.0665	27.1949	28.3976	2.19924	27.8549	21.9485	28.834	43.564	27.9235	12.9096	42.6882	30.8287	-0.911852	13.6158	30.6004	8.54983	15.8832	26.2122	6.32665	48.7041	22.0513	72.7963	28.1648	30.2201	17.5058	5.94509	12.3575	56.7448	42.9491	13.6282	29.0517	11.1893	8.97735	16.7005	-3.36042	3.03845	36.1035	1.72424	30.3893	80.5589	1.91883	5.5791	15.2487	54.2778	19.4779
42.9	27.3333	94.1159	23.2792	25.4732	29.6986	26.4202	30.9147	1.69464	28.1725	21.0302	27.2933	41.1998	31.5408	11.9722	41.0581	32.471	-2.87866	12.0191	29.5036	6.41342	17.1343	23.655	2.49645	43.9384	21.8771	72.7657	27.893	26.9826	27.1411	7.85416	13.0424	48.553	29.7644	11.5295	28.7742	15.9075	12.3572	14.2973	3.3303	6.01013	35.0197	2.81836	29.957	75.1941	2.10172	5.20802	15.9888	59.5751	17.2916
43	38.3615	90.7726	17.2818	28.1665	34.1189	24.137	28.2431	0.240833	29.5728	19.6675	31.2071	45.0139	28.7882	13.032	40.5075	31.3145	-3.02972	13.5093	31.5649	12.5571	15.4322	19.6863	7.31289	43.5291	21.9836	72.4501	26.2534	32.381	17.006	6.07994	16.4459	40.4324	41.7061	12.8585	31.9076	12.5954	14.1504	13.8643	-0.177706	7.42471	35.1042	1.61443	31.1849	75.5746	2.84266	5.44852	11.75	56.6538	16.8099
43.1	39.236	90.6671	22.7457	29.9357	34.1452	26.0003	30.1991	1.29675	26.0717	18.8946	31.9113	41.1186	16.2012	12.7469	43.2122	25.0292	-0.955124	14.3817	28.2789	6.64275	11.5591	22.0444	4.23157	47.8864	22.1183	71.5515	25.3228	25.3789	20.3198	6.9973	17.2014	44.7829	36.5535	14.0252	28.587	13.5793	6.91506	10.7901	-3.16403	0.249831	32.1037	2.63117	26.2004	76.8389	3.19853	4.68971	13.0414	59.1599	20.6074
43.2	35.9467	90.6453	27.8283	33.0409	31.6037	27.2326	27.6216	2.24362	29.6817	21.6843	31.8969	43.8356	23.1731	8.74897	41.8231	28.069	-2.60412	12.0736	30.489	0.163671	15.6162	24.6291	1.16944	45.56	21.8255	72.225	29.7561	24.4476	20.4879	9.28364	11.9442	51.5515	28.7959	15.593	24.4343	11.3356	8.93699	8.9995	-0.0268218	4.8864	34.3865	3.12055	29.6645	76.6264	-2.38097	4.58866	12.9787	54.7363	19.8814
43.3	44.0551	90.261	20.4035	26.4003	23.0969	24.0946	27.7832	2.8298	30.764	18.1218	26.9887	41.0399	20.3215	16.0011	49.5952	29.2563	-0.1183	11.7824	27.3589	2.7876	17.7274	21.0591	5.67557	43.6979	20.6879	71.7011	25.9852	29.0016	14.8414	5.56252	17.7259	44.8658	25.7906	12.1943	31.6987	12.3561	13.7216	12.9014	-4.94057	5.068	32.9439	2.94314	29.0154	76.9672	0.775909	4.94722	16.5096	55.9115	18.9024
43.4	40.3586	95.1745	32.7402	33.2283	31.768	28.074	28.22	4.18754	29.6195	19.0663	31.0641	39.8863	21.5639	11.6824	38.2968	28.7046	-0.73309	14.9213	28.8825	4.74897	17.009	21.3608	6.46349	48.0216	20.092	71.4215	28.1741	30.8244	21.7741	6.46616	14.1696	47.807	31.0826	12.8683	19.1256	13.948	11.7715	10.1258	-0.0559813	4.41976	33.3503	-1.82562	26.6554	83.2134	4.2942	4.93451	5.91366	57.3338	18.1423
43.5	37.0817	94.73	27.6898	25.7992	22.4676	26.6621	26.7894	0.301331	27.5797	18.4645	29.0667	39.3872	23.4664	15.9585	43.0519	31.0914	-1.02443	14.033	28.3273	8.09461	18.934	25.0996	9.56335	40.9563	15.4215	69.9979	28.3518	23.8468	14.2618	8.04848	15.6214	49.1145	38.7931	15.785	22.8847	11.1876	14.1719	12.6903	-2.16833	4.47904	31.6099	3.71504	28.8467	82.4874	5.4205	5.02797	12.9285	57.4266	19.5063
43.6	36.938	96.3743	20.0318	25.9934	31.4899	24.9976	27.9907	4.01163	25.5821	23.0464	31.2711	38.9604	14.0589	11.3299	45.8252	29.0022	-1.28139	12.4327	25.1045	7.93813	21.0213	19.4167	4.4841	46.2993	18.3059	71.4042	28.0707	30.1547	17.3196	8.26583	14.7314	41.7553	37.1958	14.2188	29.6784	12.9522	11.2049	11.955	-1.31359	5.69454	33.1961	1.59218	31.3867	83.4151	2.40034	5.62673	8.94323	56.3699	19.8265
43.7	47.8393	95.5109	25.7413	27.4652	28.5183	26.0674	24.877	1.99286	26.1725	22.8558	31.3684	39.585	20.2932	14.313	48.1564	28.814	-1.59041	14.2246	28.291	5.42474	16.4908	25.2833	7.06309	39.5968	26.4705	70.623	25.2467	19.1273	21.6079	7.33118	11.1444	46.7684	33.9542	6.72613	23.4345	16.4073	14.2691	13.5957	-3.34598	2.53103	32.8234	3.39926	29.7432	81.1667	2.4463	4.00143	15.4923	55.2531	17.4931
43.8	42.5507	96.4972	24.4316	30.0648	28.6791	26.6379	29.3774	1.07013	27.6523	20.7821	30.1302	38.6467	20.3867	17.1602	48.8137	27.771	-2.29916	14.3414	26.9091	4.52136	18.0683	17.6451	3.23681	48.3624	24.49	69.8923	28.2951	26.4591	16.7439	6.20171	13.7403	39.6644	28.4999	13.8862	24.8887	15.987	12.1397	19.1837	-5.23098	5.43268	33.5174	-3.40594	27.7869	85.2022	5.77527	2.38918	12.9168	56.478	19.962
43.9	35.5709	93.11	18.743	29.0955	29.8566	26.4171	29.0035	1.77044	24.3564	20.8851	28.6822	41.6774	18.5945	11.0982	40.1856	32.5192	2.16088	14.9403	27.1704	1.738	17.6986	23.1112	6.65201	43.5491	21.1729	69.4254	26.6387	30.9138	18.1672	7.58768	11.8406	48.1001	26.1974	14.9529	27.8017	11.4332	10.1103	14.9351	-4.90918	3.71115	31.9966	1.78277	30.5607	81.5836	6.08413	5.21106	14.9503	59.5272	18.0123
44	35.4088	94.6857	19.1371	29.5312	29.2091	25.6675	27.2484	0.872859	25.8068	19.8358	25.856	40.3261	15.6959	13.3872	53.0153	33.9789	1.20043	13.0935	28.5713	4.46902	17.8882	20.123	6.00095	42.3361	25.3125	69.2016	25.6031	33.4662	17.3906	7.92362	14.4474	51.2512	32.4907	13.7782	22.9374	9.79604	11.381	14.7722	-6.30928	2.9044	28.0073	0.921582	28.6605	80.3482	0.840961	4.67686	13.0773	56.7724	18.3637
44.1	41.7917	91.5303	25.5287	29.1109	32.1295	23.1085	28.641	0.80325	25.7838	21.32	27.4212	43.9784	15.6676	11.7141	48.7958	28.7828	-3.20108	13.6897	27.6895	5.85918	17.1139	14.1391	1.55026	45.8816	22.2095	67.6598	27.9326	32.4432	15.9876	7.00196	12.8182	50.4559	20.9133	11.5298	24.1356	11.2356	11.2906	14.3469	-4.57552	7.04891	31.4491	-2.16833	28.895	84.1205	3.40335	4.2968	14.8069	61.4233	18.1338
44.2	38.1895	98.828	20.9268	26.5907	29.8908	25.0785	25.6537	1.45138	24.8833	19.8185	27.6673	43.2189	27.0842	11.851	48.5238	31.3673	0.338327	13.2596	29.1643	1.65825	17.8497	19.6725	3.43997	41.3106	14.0722	68.2221	28.9593	38.3881	15.2437	8.75201	10.691	46.7054	29.2331	8.14753	21.0901	8.6648	11.6752	15.4473	-3.67873	5.62375	28.7085	-0.235854	29.3664	78.6785	1.52599	5.88536	15.5209	57.4284	21.4151
44.3	40.4253	93.5153	17.6529	22.0298	31.0086	21.6738	27.6219	1.37459	28.5508	14.5029	27.9615	33.876	25.2543	13.7534	51.877	28.3252	2.11569	14.3569	25.1009	2.00767	18.2613	21.8893	3.46629	42.9814	22.927	69.4244	28.4883	34.5384	17.3393	6.18543	12.2093	45.6179	24.2314	10.5646	20.333	9.67115	11.4742	17.2083	-4.87617	2.53656	30.7044	0.581234	30.2079	83.3474	-2.43442	4.53031	15.6724	55.6721	19.6534
44.4	39.2087	93.8912	12.819	29.6002	25.7387	24.2775	28.8216	1.98786	24.265	22.0277	27.0573	40.0923	25.6577	12.095	53.098	29.2424	-0.350045	11.1519	24.6614	0.443519	19.4106	12.6628	-0.400912	40.5616	19.9324	69.0894	28.1248	24.7318	11.4006	6.65492	12.2917	44.0941	27.4445	12.6979	17.8798	7.78644	12.1857	14.8736	-3.47276	-0.147657	28.3658	2.03878	25.6083	78.733	2.25186	5.32703	14.2118	55.7744	18.7162
44.5	39.5084	97.8553	19.7692	29.8371	36.9671	23.2599	27.0435	0.354798	27.5842	17.8921	30.1488	39.1804	23.7399	10.9754	59.1368	29.0308	0.700406	11.0224	27.7622	-0.95166	20.4163	17.7759	3.49111	43.8052	23.4507	69.7358	25.6857	23.0989	20.9848	5.78122	15.0298	43.0152	30.415	10.7356	16.3841	12.7701	10.6128	16.4974	-4.16164	2.71087	31.9535	-1.14166	30.4885	78.0155	1.29889	5.26491	14.5178	59.2152	22.3109
44.6	42.2889	98.8211	20.7041	24.0108	30.6237	23.9963	28.3682	-1.77209	27.1574	17.8915	29.8985	40.2782	23.7664	15.7599	57.2312	24.5958	-2.58575	12.4769	27.5936	1.69612	19.6623	19.5143	3.28015	42.1092	21.2297	65.9194	29.5105	25.201	20.3007	7.52196	14.051	42.187	26.5286	10.115	23.9829	11.3716	10.8148	16.1488	-5.8601	3.5059	32.7728	0.558617	31.2898	81.5709	5.07815	6.27375	13.0266	61.0618	17.8619
44.7	36.1163	98.6956	23.0976	31.3478	36.8379	20.9771	26.5196	2.36925	26.1907	16.6053	30.9296	41.1545	22.7083	13.5213	59.0885	30.0519	0.0846378	12.4566	26.4473	-3.15748	20.6057	23.5886	-0.312077	43.9819	17.6232	66.0554	28.7698	28.899	18.0211	7.39169	8.39443	43.3983	32.5939	8.26407	28.3674	11.267	12.4926	15.3532	-7.76394	3.65927	31.2692	-0.0520242	31.2667	86.8291	4.70754	6.00813	12.3931	57.8373	18.5537
44.8	36.212	95.8177	21.3216	31.3598	34.4024	23.1755	27.9197	1.63853	26.1591	16.679	26.8516	44.0181	20.3542	11.3601	52.8515	28.5934	-0.730982	12.7692	27.5687	-2.25774	21.594	21.5087	3.46978	39.8191	22.9658	69.5579	25.8149	30.3053	13.6991	7.58855	13.9341	43.0325	21.1568	8.78957	30.1938	11.652	11.5483	19.7654	-6.26096	2.22793	34.2244	0.525824	27.6601	84.1651	0.871113	6.44384	14.4094	56.8831	21.7517
44.9	36.1022	88.5606	17.2868	22.7235	32.0396	21.535	23.5989	2.77205	24.3162	14.4373	29.5064	44.7865	21.9708	9.45797	50.4484	29.9571	0.333735	14.3878	24.9932	-3.3753	18.8999	22.038	3.18016	41.3922	20.112	64.8584	25.6013	27.3679	19.1584	6.91444	13.3576	35.9008	27.7934	12.0384	37.7002	10.0853	12.7732	14.0038	-7.36824	-1.76814	32.5112	-0.101631	28.2619	85.2471	2.29246	5.86385	14.8449	58.0782	20.586
45	37.846	84.1838	18.8076	16.65	31.113	22.8845	25.429	1.98307	23.5859	13.3745	30.1157	38.9526	23.5646	5.43622	48.8627	26.7718	-1.12773	13.2049	29.3617	-0.470431	21.0399	19.2932	-1.08527	46.7799	20.3799	68.8654	26.4211	24.7671	12.6628	7.11042	17.5822	42.5657	30.6258	12.9584	40.6521	10.4436	12.3419	20.8307	-3.8843	3.0346	33.0367	2.50227	30.5759	84.4206	1.34579	7.44893	11.0467	54.1676	21.4491
45.1	39.1491	96.3546	14.1828	26.4649	25.5722	23.9553	24.887	1.1904	24.3559	15.5085	32.9175	41.1845	24.5057	11.6426	53.4254	31.9269	0.668343	11.9502	27.0618	-1.13112	22.773	20.8716	5.86783	43.4599	20.8468	65.7327	26.5408	24.6924	17.7499	6.27512	13.6638	43.1485	23.018	13.2606	39.0767	10.1766	12.3177	13.8513	-4.68262	3.45997	31.2535	-0.243905	26.629	84.9188	3.05483	6.54721	11.7297	55.2804	19.2072
45.2	33.4623	102.266	15.1016	27.5828	25.4123	23.7924	24.9879	0.87745	24.7328	16.3056	30.109	44.9455	20.2714	8.30286	55.0564	29.3159	0.300993	15.9722	30.0907	-0.329255	19.394	18.5833	4.68358	36.0315	20.9879	67.3638	22.8717	27.0651	14.8967	5.8182	16.2401	36.5792	31.466	13.6807	40.3105	9.97398	8.65079	16.1331	-5.0048	1.6042	31.3991	1.51866	29.2045	86.9689	-0.902771	5.29416	14.714	56.2146	18.5483
45.3	33.8261	96.1457	21.4861	24.8518	25.2415	21.8282	28.5776	1.32124	23.2732	16.7403	33.853	40.0046	21.6043	14.5532	55.8919	22.7782	-1.89126	13.3805	27.0869	-0.207861	20.5961	19.3791	3.67237	38.2699	21.8098	68.4794	24.1127	32.0166	25.2686	3.76471	18.069	45.2592	30.8369	11.0602	33.0258	8.17155	11.8837	17.1993	-4.91705	-0.48944	31.1993	1.10293	26.9901	84.1236	2.27316	4.04549	10.9449	55.0123	18.8252
45.4	38.2819	91.2614	19.138	23.3303	33.2124	19.1628	25.9243	-1.04323	24.1722	20.6826	28.8494	43.305	24.3989	10.0951	57.063	25.7028	-3.40529	12.2329	29.2826	-4.84799	21.8845	24.0336	3.69708	38.2965	20.2893	67.6766	26.0594	34.0425	15.3494	7.32221	13.5722	34.4089	27.9	12.2469	43.512	7.32447	10.7121	13.4309	-7.56034	0.0379131	30.4062	1.76304	29.2321	84.0533	1.72833	5.78536	16.174	54.1782	18.7787
45.5	33.1812	97.8209	24.0085	27.6684	30.0691	21.5889	26.3222	0.943795	22.7653	18.5823	29.4872	42.8899	25.1387	11.8359	56.2582	23.9338	-1.93188	12.0924	29.9536	-4.33391	21.3467	20.6203	3.25662	39.2193	19.1735	64.5059	23.8204	24.4336	18.1942	7.64138	16.6119	40.5815	28.896	13.8545	42.4656	9.8128	10.792	17.2291	-5.899	0.717863	34.2673	-1.23007	27.9821	85.775	2.05229	7.71333	15.3311	57.5542	16.5753
45.6	28.3719	95.382	25.736	26.1743	24.1984	19.801	23.3542	-0.370184	22.0338	18.3099	27.7182	46.435	23.7672	11.4434	56.2136	28.8025	-0.928986	12.4024	31.9786	3.20408	15.6621	20.3613	1.34998	39.0369	16.7891	65.8892	27.0351	23.7132	11.473	4.80674	13.0775	43.7002	24.7073	12.256	39.218	7.9169	8.15828	22.0972	-10.2594	-0.387319	30.3485	-1.91977	27.0788	84.0344	-3.34936	6.08492	13.1522	54.6372	19.8616
45.7	35.2668	97.6815	25.9497	25.0407	31.4166	23.3521	25.8874	0.812983	20.5316	21.4162	30.7973	44.2151	16.3676	8.85702	48.9939	25.2767	-3.44015	14.5638	25.7696	-7.1608	18.1476	20.1989	0.731017	35.4855	18.5783	67.2916	24.5237	23.9662	16.4677	6.75786	15.5729	38.3379	33.9229	10.1116	36.6077	13.4455	11.6299	18.4725	-5.95586	0.390824	31.4685	-0.25573	27.6847	84.5077	1.14881	7.50601	12.496	54.6637	19.5597
45.8	32.9924	91.3772	28.6599	24.379	29.9186	21.3845	24.0373	-0.357143	20.2575	11.9352	27.542	40.6886	20.0921	9.81624	51.5946	26.8007	-1.11378	11.992	28.2102	-4.39235	21.4489	19.2472	0.283125	45.0098	15.5621	68.626	22.9482	24.3931	13.4167	8.3865	16.0352	35.9401	31.4026	12.1998	39.9458	12.6816	7.83235	17.5319	-3.66981	1.22941	29.5781	-0.918292	29.5476	81.6637	-0.385951	5.41691	13.0015	56.8592	17.4214
45.9	42.3157	96.792	18.6885	27.1584	33.3967	24.5509	25.2126	2.05577	19.2268	19.3938	26.3237	39.5918	17.9461	11.1649	50.7413	30.1616	-0.276239	12.6695	27.6298	-6.5943	21.4243	27.0707	0.82464	37.1295	18.0406	67.8828	23.9919	22.8673	18.6736	6.07174	15.9773	38.0411	30.9049	12.0414	44.1493	11.7611	11.0974	17.1506	-7.75228	5.02892	28.4697	-0.97839	26.1575	84.7228	0.484361	4.74233	12.5148	59.1376	17.1318
46	36.8113	86.0971	26.9167	22.5423	24.1786	19.9301	25.9744	2.95764	23.0497	19.4215	26.2822	39.8314	22.553	11.7595	52.9946	29.9761	1.06182	12.0105	26.2475	2.53259	20.7188	23.8004	-8.49011	38.789	18.5653	64.8419	23.7025	32.0216	13.2424	6.86282	16.0598	36.3344	25.5495	13.6044	48.8011	13.4978	8.5177	15.9879	-6.60715	2.15722	30.9657	-0.265481	30.0566	84.4427	2.78459	5.52736	14.3382	54.6979	17.9148
46.1	39.5764	96.183	22.6254	26.601	29.9185	23.2654	24.6583	0.94755	19.2211	18.8862	26.5362	39.3814	18.0517	11.4574	52.1878	25.9442	1.76325	12.5206	27.3336	1.3315	21.6722	18.2857	-6.99689	34.7326	-7.85506	64.5637	23.5574	26.8649	9.5843	6.32142	14.5175	46.0575	24.8822	12.875	50.6512	12.395	8.5787	15.2658	-6.36211	3.08518	33.8346	0.42478	30.6754	85.3345	-2.58411	6.33354	14.3162	60.459	19.6705
46.2	37.0061	93.0803	28.4835	24.127	28.2909	21.505	26.5857	1.1903	20.6645	23.1994	28.8598	39.0006	26.4351	11.6364	49.2584	32.7318	0.237006	13.2444	28.862	6.43097	23.1189	14.6502	-1.61295	39.1976	15.6676	62.1714	25.5181	28.2733	21.0316	6.23997	14.1981	38.3707	25.0209	16.2819	48.0414	9.01315	9.28901	12.9594	-1.9801	1.64015	24.7601	-1.92088	29.8682	85.2176	6.22836	6.36873	13.6621	57.9836	16.9884
46.3	25.2681	91.0475	28.5935	22.5908	28.2769	21.9851	25.0887	0.116251	23.3134	15.4479	29.3626	39.4604	20.0749	11.6006	51.4061	26.7368	3.13409	12.8056	29.3533	1.54795	21.0769	17.2692	-1.76288	33.4443	12.866	58.9559	22.8986	15.1996	15.4296	8.18962	12.6518	39.1365	31.291	14.1852	50.2322	9.56887	11.8895	15.4127	-5.54257	-0.460896	29.7695	0.830406	29.8527	84.2645	-1.41446	8.62009	13.5623	52.4398	14.3334
46.4	39.715	91.1893	27.1672	24.7476	28.3191	20.2558	22.3832	2.42972	22.208	23.2161	28.9272	35.1253	22.8784	12.0798	53.7085	29.6059	0.0781083	11.8871	27.6451	2.20211	24.7782	12.7477	-6.52788	27.6191	9.77902	55.8741	24.222	23.9254	17.1196	7.38628	9.02702	40.8088	22.354	10.2041	42.3348	10.6006	12.4694	15.9863	-3.56632	0.464484	28.0217	1.90676	29.3662	82.4482	-3.45386	6.27294	15.4133	58.7671	17.2401
46.5	35.1043	91.8211	27.7564	26.4134	24.7843	23.7478	22.8623	1.09877	21.5075	15.1129	28.6451	42.8899	25.7923	10.7609	56.3647	30.3305	-1.24061	11.1242	25.0784	3.21344	24.3015	20.2596	-7.93697	39.0932	18.7233	52.6621	24.7052	27.6412	17.7847	5.31665	13.828	40.649	27.2679	10.0768	44.42	8.99044	10.3211	16.1876	-0.902589	0.677715	31.4129	2.85604	32.0947	83.9012	-2.09486	4.77828	12.1598	56.459	14.4371
46.6	32.1469	86.6641	28.5524	16.5534	27.5155	21.6579	22.8131	-1.72996	21.0493	17.6538	30.9761	38.9643	28.3065	8.54691	50.9569	27.4818	1.60573	12.3086	26.4703	4.25022	22.329	22.2801	-3.23227	33.7566	22.0696	57.6915	26.9985	23.6101	17.0919	6.65023	10.7066	34.1387	29.5987	13.0595	44.0397	9.54335	9.68094	13.4322	-4.21763	0.77567	29.8333	-1.95997	31.8384	84.3637	1.15392	6.46298	11.3337	55.0679	16.6992
46.7	33.4605	93.1103	26.1949	23.5618	30.2677	23.3072	21.1014	-0.555775	24.6449	14.8658	26.0593	39.0582	28.0084	9.76571	53.1328	24.8473	2.34294	11.5741	28.2105	5.99637	21.8068	20.9251	-5.15275	31.362	15.3089	55.7553	20.0591	29.0535	9.86061	7.56547	10.6784	42.3584	20.0219	11.9244	40.1961	13.7688	11.7613	13.8227	-0.852526	0.105053	28.3162	0.0856688	31.3794	83.57	2.76329	5.01097	10.7774	58.5859	19.3464
46.8	34.973	90.7817	23.2234	17.3166	28.0132	21.0163	23.0019	0.728815	22.3197	14.3598	26.767	37.4942	23.3141	8.73479	56.4083	26.1577	-4.06661	11.6381	26.5623	1.64645	24.3956	15.6291	-2.93476	44.0196	19.7355	57.4549	22.2435	36.7347	14.7282	6.62462	11.5748	40.9223	26.2236	10.5745	43.0965	10.8696	7.76867	12.898	-4.70811	-2.02176	32.5543	-0.398518	29.325	87.4484	-1.35757	7.21222	14.9555	56.6832	18.984
46.9	29.5581	93.4661	26.15	23.9823	29.2689	20.7809	19.8455	-1.51994	23.0995	15.5449	28.2338	39.7869	23.9338	5.86914	52.2687	24.0268	-2.70026	12.7753	27.1322	-0.745963	21.1258	19.4688	-5.76002	34.8289	12.4872	56.3435	22.3133	26.805	16.1665	7.18065	11.7049	33.5364	22.4524	12.057	50.4152	11.0575	10.4707	13.2017	-1.64379	-1.42256	26.1348	-1.85795	28.2754	89.1106	-3.67151	6.31389	15.3124	58.4425	17.2666
47	21.9929	94.8117	19.229	23.577	31.9832	19.0612	24.1414	-0.310227	22.2734	22.3895	26.9335	38.0606	23.6072	6.59593	52.6875	27.6353	-1.97699	14.0814	26.0225	-3.79859	26.1938	11.2639	3.95175	33.7897	17.1404	57.3654	21.3271	25.5169	13.8913	6.9756	7.35754	38.9246	23.2229	6.49115	42.6394	8.74837	8.89307	18.3478	-1.5658	1.35649	29.6817	0.772025	30.5365	83.1318	1.633	5.30346	10.0072	60.2066	13.548
47.1	26.9	96.8081	25.6172	19.7238	32.0635	19.9519	22.5769	1.47384	24.2688	19.6218	28.5318	34.6236	24.2746	9.20071	56.7206	25.6473	-1.70816	15.2418	28.5327	-5.74064	25.7704	16.3553	-3.57111	35.3113	12.3784	55.5671	23.7338	27.5091	16.5623	8.03515	11.5209	38.7072	29.4657	13.3023	31.0276	9.26741	11.1951	15.0895	-5.43047	0.40753	32.4539	1.65913	30.2486	84.1405	0.161015	5.97695	11.5763	55.8939	13.648
47.2	21.5602	96.0031	27.9428	18.6247	26.7437	18.1248	26.5425	-0.243272	21.0732	16.5727	28.5921	37.9342	26.171	9.92026	57.9536	31.2014	-1.53386	13.9729	26.3804	-1.82234	30.3863	22.6943	-3.88548	33.8652	15.9571	57.1565	24.4268	25.4812	19.0996	7.68632	10.7633	40.0448	25.1658	13.3821	40.8741	9.68194	10.0706	12.8286	-3.01739	-0.210514	27.9743	1.81264	30.2949	85.1187	4.07281	9.50778	11.7143	55.8242	15.1015
47.3	33.6901	90.0978	22.3947	22.3031	26.8185	19.2553	23.8457	1.32499	22.2825	16.608	27.7089	38.8231	21.0336	8.06402	60.0269	28.928	-4.76734	14.8288	26.9775	1.42273	27.8012	13.219	3.50331	37.7051	13.7353	54.3801	20.8512	37.4895	12.6884	5.55948	12.051	40.6329	23.1766	10.4568	38.9405	8.20369	7.89934	15.042	-2.94628	-2.77203	32.4839	-0.645957	33.1684	77.7846	4.13678	5.83226	11.9586	55.6327	15.2592
47.4	34.1701	94.6709	20.8531	19.8404	30.2877	19.9978	21.0379	0.0811628	22.1569	16.8963	27.5978	38.3735	25.3335	13.3019	58.6549	23.9519	0.923752	12.9482	25.2802	0.397945	28.7847	16.6614	-4.01747	34.2646	15.7419	58.2177	23.9539	27.7702	17.7438	6.48295	13.3694	41.9806	21.3378	7.52696	38.7149	11.5279	12.1455	11.9109	-1.4451	-0.954761	29.3162	-1.79948	31.7595	82.1352	1.96843	5.73972	13.3289	53.5452	14.0552
47.5	33.2798	93.5233	25.1937	16.3898	26.3569	18.2368	21.7183	0.58887	21.5982	16.8541	24.0756	35.2239	19.3261	7.08753	53.6682	22.1306	0.572635	10.8919	29.9481	-1.56423	27.8089	16.0104	-5.0351	41.2911	16.4534	53.9588	19.2191	28.768	10.7582	6.77553	15.8222	45.0752	25.3665	8.57032	35.5303	8.04623	6.68055	19.6355	-2.76008	1.71301	35.1367	-0.930836	28.9006	84.3599	2.35113	7.52761	11.0534	61.148	16.7724
47.6	30.5012	100.544	12.4972	14.8996	22.6056	22.6813	22.6303	-0.351727	22.3076	13.351	25.8318	38.8148	20.4909	6.24403	56.3441	26.856	-0.45166	12.6739	25.3203	-3.07973	23.2425	13.652	-9.87229	40.0211	19.2642	59.627	16.6685	29.4988	15.274	7.59215	7.65534	38.8377	18.4977	14.4189	39.8292	6.42919	11.5524	10.3412	-6.06356	1.51233	32.2196	2.58952	30.0168	80.2733	1.82125	4.22125	12.1209	59.362	14.5085
47.7	31.9963	94.8186	22.3372	20.8669	29.8943	20.8885	22.5453	1.45406	20.5101	13.3527	26.6325	33.6466	22.52	9.93784	52.4918	28.7064	1.33296	11.9845	29.9103	-3.33515	29.0315	13.4601	-5.81585	36.4975	17.326	55.953	23.0774	23.5148	16.0442	5.69849	10.7379	44.7657	20.648	10.7818	33.1462	8.95283	12.3795	13.5378	-2.92464	-1.17831	30.3537	0.928603	34.0999	82.8061	-3.37792	5.45409	11.9716	58.0421	13.1608
47.8	39.6882	98.3234	26.8395	18.0977	25.5077	18.597	23.5544	-0.122909	22.9772	17.8466	25.6774	37.694	25.4462	9.74305	60.7302	25.8318	-0.747006	12.0426	27.3809	-5.59736	27.6531	10.7519	-7.8877	34.5851	18.9724	57.8017	21.1004	26.5654	11.525	5.27081	13.1443	39.0067	18.9242	10.0968	37.7026	8.41563	11.3722	13.54	-4.48413	0.0103182	27.57	1.1653	31.3022	81.8862	6.11504	3.04299	10.956	56.0209	12.5144
47.9	44.2978	97.9297	21.8408	19.911	28.2764	19.5148	24.6027	-0.916607	21.0317	19.4938	29.6251	36.7866	22.8287	5.72786	57.7818	29.9787	-0.0822382	11.8579	26.3149	-1.30297	29.6469	9.23428	-9.81027	36.0702	13.2207	55.3441	22.3776	18.5434	13.3824	5.03228	9.35429	43.5425	26.6575	9.59402	38.0032	12.0611	12.5201	11.2641	-1.76034	-2.83398	29.0334	3.82451	31.7506	77.5966	1.50989	1.55464	8.84376	53.1448	15.2341
48	39.6623	98.4155	17.3441	21.8302	26.5213	17.2431	23.1627	0.547262	20.4419	16.4844	30.0008	35.9264	30.9419	10.119	60.2658	31.2125	-6.20523	12.2414	28.2608	-4.38504	29.8139	12.095	-7.39291	33.9318	14.3533	60.5696	21.4411	18.3451	10.5513	5.71048	11.5651	47.5724	21.451	10.3431	34.485	11.0807	10.4573	13.6061	0.554112	-1.6226	31.4367	3.70811	29.9178	83.5587	3.34065	6.29964	12.0842	53.4371	14.2754
48.1	32.782	91.9763	21.3882	19.4029	25.2716	21.7166	23.0262	0.797525	21.7009	18.1741	27.3992	39.2046	20.8596	7.61274	58.2709	29.4389	-5.04573	11.8504	25.9808	-4.72481	27.3299	14.2646	-5.62221	38.3917	11.8026	55.8045	23.8915	19.5432	9.49103	5.68533	7.2824	40.4723	18.6662	10.395	39.3766	7.50901	11.4718	15.1543	-4.36818	-4.03398	27.7871	3.36551	28.2893	83.1162	-1.44987	7.89282	12.1626	53.7133	16.3116
48.2	34.5963	101.189	19.2658	16.1431	22.7917	18.7098	21.9587	0.0580209	18.8227	15.5658	25.4271	40.4976	20.7774	10.2614	69.2061	27.3035	-1.08488	10.7807	30.4473	-2.78523	26.6387	20.6262	1.70015	30.0779	11.7886	56.9233	21.8455	31.2244	17.8557	6.23608	11.5598	46.8167	22.161	13.6254	41.3959	9.91716	9.90035	12.7368	-4.42569	-1.51449	32.3369	3.83446	30.5273	80.1671	1.94189	8.3753	10.6996	58.2461	16.4629
48.3	22.4107	95.4818	20.9241	24.7965	25.7497	19.431	25.3649	-0.478392	19.5464	20.343	26.0824	40.9476	24.0768	10.9104	62.4593	30.754	-2.94756	11.5491	29.2761	-0.439123	26.5492	14.769	-2.89552	37.4956	11.4727	53.2219	18.0273	21.3898	14.3785	5.78231	12.7596	43.0773	21.2467	8.01108	38.1298	5.40818	7.6953	13.3324	-4.80826	-0.353016	25.4852	2.67066	32.02	80.3992	1.94809	5.82747	11.1719	57.6013	13.7365
48.4	39.5814	89.0073	19.0674	16.539	26.1828	19.7465	21.7836	0.546306	23.5532	15.6277	26.4957	37.8817	22.4696	11.1784	61.9063	26.2016	-6.09735	12.7129	29.297	1.99575	26.2166	20.1046	-9.58977	38.122	14.2079	54.1276	23.3094	16.7183	8.51944	5.731	13.6938	36.3	15.0296	9.05054	34.1055	3.89181	12.1451	12.9235	-5.09413	-4.33362	30.1085	5.70406	30.5858	84.7108	-3.06352	6.30744	9.66647	61.045	10.6826
48.5	36.7717	92.8074	19.5072	17.6023	26.1949	16.2832	27.4287	0.500251	20.6635	14.3741	25.1969	38.4776	23.5054	7.96799	64.9909	25.9068	-0.810686	12.556	28.3919	-2.39433	27.739	16.6386	-0.497788	33.0347	13.9031	56.2268	23.2274	16.9813	7.74662	6.39081	13.6117	40.7184	17.0699	12.1671	36.1022	7.39627	4.31787	8.93486	-4.64241	-0.264774	28.3614	1.63793	29.6205	82.7337	-0.959368	8.46151	11.228	57.4463	11.8613
48.6	35.2665	100.51	18.5897	17.7163	28.646	15.3688	22.3419	-0.288069	22.0355	16.0075	26.0443	30.7622	25.9124	5.56571	63.5445	28.8088	-7.0954	13.2211	27.8123	-3.54266	28.4005	12.0242	-3.85988	37.2485	11.4024	56.571	23.7249	23.0918	10.6197	4.4085	16.1495	39.3265	18.6619	10.6508	35.9733	5.83728	12.1427	16.5622	-4.5791	-1.20997	29.1261	-1.22588	29.3856	82.4061	3.65679	4.18386	11.2717	55.2683	13.5101
48.7	29.6491	96.5933	20.9966	14.9926	24.4402	17.3957	20.1868	1.35015	21.8364	13.4751	25.5816	34.9086	32.1913	10.5766	59.229	27.4189	-5.63386	12.187	25.0697	2.57937	30.1336	17.7961	-4.197	37.0885	12.785	52.4125	22.598	26.4122	8.3062	5.91376	15.4638	39.5184	22.3037	11.1499	34.5156	5.68099	12.4936	14.2538	-5.03715	0.840452	25.8778	1.59189	30.251	81.1211	0.758503	4.59414	12.7512	59.0265	14.9479
48.8	27.8088	96.9756	16.5703	22.3614	27.6993	16.5706	22.1989	0.565405	20.1235	18.0409	24.681	33.4896	27.344	8.72977	59.7835	25.419	-2.88579	15.5902	29.1422	-2.3362	26.9446	11.8529	-2.61079	30.5472	12.9743	53.5816	21.1462	21.0019	15.9093	4.98315	10.3175	33.6997	22.189	10.1083	34.4481	6.75595	11.9791	13.3799	-3.14945	-2.36401	27.1862	5.31537	30.904	76.8283	2.19413	7.11351	13.5665	56.8644	16.126
48.9	30.9139	97.4927	23.5178	19.5786	22.3985	15.0414	23.6749	-0.955192	20.1374	10.4604	23.1265	30.8224	18.9915	8.77966	52.9733	28.0769	-2.94943	13.0951	28.1422	-3.7159	25.5742	12.0578	-7.79776	31.5209	16.7829	56.4482	23.175	16.0273	13.8946	5.68426	13.1652	40.2858	18.9683	12.4234	34.1547	6.90826	12.0864	6.96295	-2.80239	-4.96199	25.9342	3.16214	25.4986	85.505	4.69894	6.75848	10.962	57.0041	12.4558
49	32.7028	97.1261	14.6149	22.4314	27.4119	15.4011	20.5186	-0.901065	20.2786	15.5351	19.7725	33.4122	23.8026	8.39899	67.3778	27.4252	0.17245	13.6065	25.1471	-4.23745	25.0552	9.32166	1.00238	30.6697	12.7649	51.649	23.6034	25.7057	8.86283	6.82015	9.87341	36.5204	17.227	9.91266	28.2603	8.59279	12.7078	16.1481	-6.49474	-5.89885	27.267	2.6157	30.3704	83.4241	-1.24709	5.59018	10.6445	57.1494	14.8143
49.1	42.0618	93.3657	12.8486	14.8654	19.5704	20.1097	25.0804	0.51992	20.9436	15.1804	25.0061	35.4621	24.6127	3.92164	56.9711	26.4778	-3.89567	12.4743	25.584	-0.385255	26.8044	7.81988	0.256367	37.16	8.28809	53.7506	23.0021	19.726	10.7006	7.50925	15.8214	40.1337	19.6742	11.9369	31.1005	8.73896	12.0259	13.3671	-3.72749	-5.30149	28.847	4.26567	28.2026	83.9853	-0.715578	7.05798	13.6307	55.6996	15.4743
49.2	44.6174	101.712	24.1617	17.6981	24.6355	18.703	18.5133	0.623684	21.2172	10.1817	22.1248	34.5327	26.718	6.5473	56.2631	26.5868	-3.17511	11.285	24.6712	0.442984	21.3954	13.0302	0.331335	35.317	12.3106	54.7231	21.0755	21.6361	7.4658	5.98649	14.0376	40.1753	22.9389	12.3512	35.0531	9.33178	13.1578	16.741	-3.0856	-3.25541	30.1381	5.83025	32.9847	85.1481	4.2952	6.00775	11.9731	58.004	17.7533
49.3	39.4393	97.9887	19.4067	11.6415	26.6609	15.476	20.2189	-0.877349	15.5719	13.452	23.5623	37.0287	22.4989	3.82083	63.722	27.9205	-4.74529	12.9702	22.8195	-1.71351	25.9372	15.6138	-0.179906	29.0448	13.846	50.7813	25.9951	28.1248	10.821	7.12817	13.7384	37.8167	25.3661	12.0236	32.1131	10.1721	13.3173	12.4879	-5.70465	-1.55497	29.2264	6.18161	28.3712	82.3569	2.27407	7.30645	13.0558	57.3763	14.7213
49.4	33.289	95.1135	24.1647	12.6764	26.0874	16.0631	21.3062	-0.630926	17.0333	9.94092	24.8774	35.8132	26.6238	4.89414	62.6298	26.5391	-1.47403	13.4649	26.2159	-5.84042	22.0358	12.5192	-0.566359	32.6876	14.0121	52.9318	21.2332	21.7627	0.74333	6.4165	15.4913	35.8587	22.2333	12.0642	32.1998	12.2054	7.67773	9.61768	-2.97841	-1.10282	26.7398	7.65241	29.0932	84.4831	1.90048	7.81878	12.6684	60.6376	15.4028
49.5	35.5086	94.0126	20.641	15.6684	21.8994	15.6425	25.2272	-0.484705	16.3328	11.8559	24.4448	33.5165	26.5249	7.69423	66.1055	28.7115	-3.17902	11.9909	28.7915	-1.00297	21.3449	6.28819	-5.13966	33.587	15.8094	54.6699	22.4714	22.4714	15.3524	3.9904	12.3014	33.4576	22.889	10.0716	31.3391	5.04307	11.2194	7.05492	-2.63429	0.283694	27.7727	3.82759	29.285	87.7184	0.754641	8.95264	13.5977	57.8275	14.681
49.6	32.2171	93.8079	19.3719	20.1453	24.2566	19.3503	23.7872	-0.473716	18.9163	13.2548	26.6144	37.3368	19.4132	3.69361	58.169	26.0118	0.702419	13.5492	26.3157	2.46851	24.8948	6.16085	-3.4155	32.042	16.8159	55.5145	24.3969	21.5786	10.1933	5.43378	13.2877	35.4768	25.6466	11.8532	32.6049	5.98854	11.2974	10.6493	-1.70153	-4.07032	25.3732	3.64603	29.3629	83.5928	0.482751	6.55564	14.5599	60.297	14.1199
49.7	35.6609	97.8106	21.7317	16.7083	25.6819	16.5701	21.1402	-1.40884	15.833	10.9644	25.9213	30.8361	29.7444	1.92114	64.0391	28.3129	0.357212	13.3558	24.7208	1.16011	24.3152	11.8281	-4.95779	30.85	14.101	57.293	20.8478	28.0323	10.8696	6.80166	10.1661	38.7301	16.439	9.18514	25.8153	7.97204	13.7142	7.24658	-0.274991	-1.91178	21.9033	5.91455	30.7398	83.4678	-1.52491	7.44447	15.3873	58.3792	12.9863
49.8	42.639	94.6906	23.2215	8.91302	26.0066	17.4526	13.5477	-0.748475	15.9895	14.2824	25.7884	31.4803	23.4357	8.36395	59.5287	26.9118	-5.87357	13.626	24.2373	1.22616	21.8183	21.1222	-5.2009	33.2521	19.5307	52.6049	21.9488	35.6499	5.92347	5.78093	9.60504	42.3009	22.2556	8.04219	31.3658	5.69596	13.9261	12.8952	-4.33988	-3.46718	25.3884	2.74238	28.0502	82.0066	0.374461	5.49648	14.5417	58.1314	13.4103
49.9	37.5251	95.8409	26.2339	15.0422	25.4421	16.7036	21.1583	-1.79631	15.6062	13.9788	27.5372	31.5156	23.1161	6.69011	63.0822	29.1713	-2.56513	11.5185	26.8694	-6.13654	23.8024	18.2544	-1.22216	26.8422	8.77636	55.4616	23.6957	25.2605	7.4908	5.9587	13.7089	30.3288	27.2174	9.06183	34.6878	7.81547	13.2022	10.8127	-3.06133	-3.87363	22.1351	4.86599	27.3319	85.0362	2.0425	7.96379	13.5597	52.334	14.5039
50	32.3004	83.8098	24.7444	16.8617	25.5117	15.5103	20.3924	-0.582776	18.951	8.46325	24.9105	33.0428	22.3694	9.97886	58.4061	29.9852	0.540562	12.9564	27.7173	1.45021	26.45	12.5427	-1.96467	25.3397	14.9515	50.9986	18.9274	22.2484	12.9155	5.64532	15.9547	36.2394	19.7415	10.3175	25.4771	10.315	8.44213	9.77264	-1.97142	-2.09112	24.368	-1.09835	30.6464	81.3056	-0.735956	5.57698	11.3039	54.7438	11.9555
50.1	39.4802	88.1675	18.2547	15.4837	19.8492	17.1195	22.5931	-1.41709	17.0767	8.32109	27.718	27.1145	22.5043	8.33305	62.6031	27.1385	-7.42725	11.3172	24.4796	-4.92222	28.4684	10.1771	0.252676	30.702	13.2459	52.5871	21.1202	20.6653	11.4988	5.40698	13.3907	35.8585	23.4506	11.3152	38.2089	8.19906	12.2833	8.58236	-2.33494	-3.08852	21.3972	2.87828	32.1291	85.5425	-0.383031	6.90482	13.0072	53.28	13.765
50.2	38.7215	81.7683	20.3373	15.6774	25.7254	15.9205	17.3188	-1.02058	15.4073	10.7685	26.5147	31.815	25.4057	5.72113	59.9249	24.7108	-6.34232	13.7393	29.0289	-1.48001	26.1837	14.141	-2.31597	28.5925	12.522	53.403	19.2943	16.1423	12.2294	4.10017	14.8541	41.122	22.4013	11.7033	27.9335	7.70484	8.60291	7.97468	-6.38953	-2.89268	22.6637	3.89049	29.2044	85.3456	-0.10471	6.84304	12.748	52.664	16.6753
50.3	29.6989	75.3411	16.3277	12.9067	20.0761	15.6109	21.4392	-0.887049	15.3963	9.17069	24.8521	33.386	20.3666	7.64599	60.758	28.5988	-8.41325	8.44412	23.6168	-1.68228	27.0862	13.8413	-0.549629	35.5184	14.9154	53.8247	19.9637	19.6692	14.1755	7.46354	11.0703	35.7324	25.4444	7.0286	27.8076	8.9035	13.3268	13.3366	-4.90545	-4.59092	22.044	5.7496	29.3552	83.7538	0.832658	7.30958	10.6382	53.6425	12.6415
50.4	33.0149	79.7752	15.1154	15.191	22.1618	14.2531	19.4244	-0.625185	15.9648	11.2214	24.0267	30.0863	22.4735	5.38314	61.6168	29.8353	-5.81296	13.1828	27.938	-1.83908	24.8417	21.153	4.14979	32.209	10.9364	50.9733	21.8583	15.4335	5.21212	6.79153	14.3916	41.9154	30.2492	7.68878	25.1209	9.47692	9.49718	10.2185	-6.39812	-5.0501	22.2257	5.78064	31.2998	83.492	1.56575	4.39775	12.7824	50.2835	14.2527
50.5	39.3515	82.3289	25.2996	16.0027	19.9805	17.0303	22.9026	-1.34581	15.5173	8.64934	25.2831	37.6923	24.5595	8.47252	59.9416	29.9176	-5.71897	14.4046	25.2539	-2.24945	24.2928	19.0022	0.783127	32.1752	10.2935	52.9677	21.5246	17.6701	4.80181	6.81207	10.9294	38.1277	26.3696	9.80991	25.9601	5.33894	10.6194	9.63703	-3.9885	-5.41561	20.8773	8.54994	29.9566	83.9681	-1.68886	7.22554	13.3735	53.7474	12.7179
50.6	40.556	81.6031	14.4583	14.4568	23.7712	18.9539	18.7321	0.23224	14.0622	11.1512	24.4889	29.9749	19.387	7.11685	56.3911	30.0229	-2.54372	11.5607	27.7207	-1.00431	26.0055	13.5832	1.85069	35.9642	15.5159	54.2643	19.9788	22.9563	15.9238	6.76426	16.7341	32.7623	28.0761	9.09259	29.4546	9.5138	12.5331	11.9241	-7.02217	-4.161	24.7755	8.35217	27.2154	84.8985	2.87282	5.11405	14.4568	55.6223	11.7751
50.7	39.3548	95.6704	17.1442	13.4192	21.9548	18.513	20.9234	-1.37043	16.1527	12.4149	23.544	28.9098	19.3453	7.96572	62.4345	30.4318	-5.38891	11.6637	26.2723	0.877667	26.4937	13.6279	1.41651	35.745	14.5127	52.2312	21.1346	19.4515	7.26697	6.62172	13.8108	36.7171	32.1641	9.33016	26.0031	9.62601	10.4029	10.7472	-1.05937	-1.78456	22.4332	5.36077	28.1461	86.3405	0.548575	5.58589	13.105	53.0422	12.6858
50.8	38.9013	84.7548	13.5709	12.9463	19.1218	15.1694	19.7638	0.50809	11.6967	13.1893	21.9298	30.4076	19.2231	5.82774	59.9435	27.2459	-5.1355	11.6672	25.4428	-1.68056	23.8839	15.0249	2.12423	34.0492	15.4125	50.3998	15.7628	25.8121	2.87863	6.75335	11.7257	34.1517	27.6328	8.44369	24.6798	8.88765	8.87627	9.03096	-5.97376	-3.2154	24.9998	5.97549	30.7207	84.8586	-0.889235	7.16367	12.5671	56.5606	14.0799
50.9	38.8206	88.2845	11.883	18.0926	21.3044	15.4606	26.9295	-0.0754429	14.646	12.276	23.1718	28.3528	16.3071	8.6931	61.1301	26.0203	-4.03984	14.0265	29.4865	1.18039	24.1632	17.8962	-0.6104	33.2796	13.0998	49.3954	18.1575	24.4167	12.8429	3.80665	12.8204	33.4695	25.7824	10.2661	22.4892	6.86286	10.1686	12.1315	-5.25321	-3.84317	19.5258	4.17322	28.6217	83.4853	0.539303	5.23241	15.9593	55.8383	15.0276
51	36.2374	83.9982	17.6274	16.937	21.8505	16.6673	19.3876	-0.171137	15.1129	13.5454	23.7836	23.6808	21.2326	5.6325	59.2607	27.1124	-0.838776	14.3992	28.7368	1.38536	22.522	18.3342	1.18094	32.2357	7.529	49.8632	16.9637	21.3861	9.60479	6.17946	11.6956	39.0368	28.4952	2.59539	22.9453	9.20116	12.8804	13.5717	-1.57329	-4.73225	20.4035	6.4256	29.9088	84.1682	-1.16467	4.99643	11.4217	60.4295	13.3796
51.1	37.8421	77.2674	17.1841	14.5685	24.3046	14.9015	16.512	-0.256403	12.9458	13.2839	23.0843	22.3706	21.4243	6.85232	63.3705	23.8847	-4.31218	12.9699	24.3325	-0.520038	26.1394	14.2582	0.087165	32.6854	10.1907	52.564	12.4283	20.7576	8.82749	6.39221	14.4562	36.4179	29.1103	7.68749	26.0997	6.2671	6.87091	15.5061	-4.36666	-5.35899	24.8904	3.02307	28.3478	83.0514	-0.429524	3.51438	14.8114	54.0832	15.7686
51.2	33.4089	85.8975	15.5212	12.223	23.248	17.9997	22.1113	0.131145	15.4122	15.1965	25.367	24.6113	18.2553	8.57876	53.1355	25.267	-3.85863	12.8312	23.3244	2.43006	24.7623	13.9406	0.364612	36.6039	12.7823	49.7385	13.4768	23.4005	12.3252	7.75153	11.9292	30.7548	29.2515	9.51651	26.5673	7.30837	10.4128	9.38593	-5.23566	-3.88648	18.3972	1.73108	29.7882	81.9382	0.0640153	8.39357	13.7745	58.9819	13.5566
51.3	30.8565	79.9234	14.5198	15.4477	19.2126	15.0037	19.0149	-2.54295	15.0686	15.9687	24.9953	26.0683	23.3201	7.00048	64.7115	27.7677	-3.64563	13.4554	24.6633	0.146931	24.3473	8.51354	0.255907	24.5781	6.27419	54.0358	17.1787	23.2395	2.95941	8.19223	12.0359	38.3549	34.7339	4.98809	30.0935	6.71615	12.2017	14.4409	-5.70769	-6.35001	21.4916	2.22731	30.6927	83.0813	-4.21032	6.7833	12.5563	55.2127	8.86398
51.4	30.5495	85.9689	15.7848	16.2124	21.9687	17.9741	15.1041	-1.81076	17.1399	17.6125	28.2126	32.6838	23.0667	3.2477	61.3821	27.1236	-3.9694	13.5318	27.7455	-0.00860058	25.9357	12.681	-0.435534	42.3831	14.6369	50.2708	14.6843	24.7841	6.874	8.11147	12.5331	34.0774	35.4436	7.08926	31.8843	8.49611	11.6704	12.4647	-2.34493	-8.09546	22.1476	4.67126	29.3844	83.5453	-4.33558	3.36305	12.3418	56.3362	12.7109
51.5	30.3662	80.9882	22.3634	9.2905	21.1886	17.5845	21.2996	-1.29166	16.4047	14.1967	24.8911	30.0893	22.9881	6.95989	61.4944	31.7847	-5.71563	13.6189	26.5795	-1.51988	20.6704	8.89526	1.6815	39.9438	10.9443	49.4641	13.9434	21.3964	2.41339	6.81165	12.9735	37.0777	18.3621	8.67824	16.2894	3.05135	11.2342	11.3859	-5.78145	-3.55548	21.6114	1.37885	28.349	84.5567	-3.25646	6.01273	14.3239	53.8975	9.47588
51.6	32.4749	78.4631	18.0322	13.7439	22.9026	15.5695	19.1383	0.379584	15.2652	10.6981	23.2271	30.2954	22.2829	8.22791	56.6877	29.1648	-7.85681	12.9668	26.6222	-3.29082	26.8264	16.1782	-7.95047	28.8731	11.4165	53.8644	15.1249	22.9146	4.28828	7.26831	12.1719	34.2399	25.6574	8.28358	29.6616	7.86548	9.72722	9.63592	-10.9223	-6.49942	17.4451	1.62848	27.6523	82.3094	-2.57467	3.90717	15.6134	58.5453	11.9645
51.7	35.9676	84.333	16.8697	16.7256	22.825	13.3067	16.3725	-0.98706	14.7933	12.572	22.0112	26.9825	22.525	8.05118	57.8684	27.0903	-6.87844	9.95315	26.674	-6.80951	23.2874	15.198	-8.15876	26.3014	12.6452	54.9505	14.3326	23.4337	9.57398	8.59894	12.3467	35.0782	30.6313	7.83334	19.3709	6.03787	9.67736	8.4739	-6.8453	-1.52754	23.231	3.02072	29.3948	83.3731	-0.969415	3.20091	14.2641	57.226	9.55623
51.8	34.0084	79.9685	17.0267	9.09416	22.954	17.9036	20.4018	1.84301	16.9972	14.8782	24.2226	32.9425	20.0907	3.45242	50.0197	26.7473	-7.19545	9.43148	28.2489	-4.19325	26.2617	20.2609	-8.31673	26.3784	12.0986	49.3494	12.6935	16.8838	9.92924	8.66004	9.6444	31.7034	22.5556	8.867	16.6051	9.45425	10.9471	8.13494	-3.28583	-5.00888	15.8846	1.85901	28.426	84.2894	-5.45522	4.78706	13.6792	54.7938	11.5887
51.9	39.8176	79.495	25.9686	11.6739	22.9577	14.8927	18.9309	-1.80897	16.6471	9.14634	23.1972	28.2752	20.7295	5.85376	52.3622	26.2043	-6.72245	11.7893	24.6797	-3.28229	24.9002	13.0618	-6.77321	27.1351	13.7512	53.9649	9.05052	24.6049	7.77303	9.12121	13.311	39.8995	31.195	8.40637	25.7159	10.0074	13.1711	8.64721	-2.90258	-3.06523	21.2496	0.355223	30.1071	81.8658	-7.09252	2.28723	12.8343	54.53	12.807
52	28.2979	79.7687	21.0015	13.0611	21.0989	16.1369	19.922	-0.440413	15.9004	10.8055	21.3445	30.6081	21.7039	3.17839	59.2644	19.6595	-2.68384	12.5076	25.639	-1.64243	24.6039	22.3491	-7.30064	30.7853	9.69071	52.4677	14.4039	19.3015	10.7114	8.53715	9.58231	27.8267	25.908	5.7051	33.6247	9.63056	7.69784	3.84294	-4.17684	-5.60933	16.9408	2.51081	27.6441	84.2473	-5.49153	6.86068	12.3041	52.4034	11.3628
52.1	33.5673	91.5285	23.6815	11.6972	19.4715	12.0813	19.7465	0.340812	16.5663	13.2699	20.345	36.4042	22.6283	7.52899	56.7485	29.0029	-6.0145	14.7911	27.3598	-5.86773	23.8308	15.9237	-9.56101	29.502	6.89562	49.1813	18.7046	21.4997	1.79139	7.7941	10.7883	36.2055	25.2171	10.3688	39.4559	10.2768	10.5832	8.84458	-3.56157	-6.99605	17.8122	3.47566	31.183	84.0446	1.10055	6.7609	14.8229	56.3277	15.9733
52.2	29.0163	88.6595	17.8329	9.14851	22.4143	13.9172	21.8003	-1.44289	12.2412	15.1753	18.9982	33.3579	20.0697	4.41443	61.0264	26.4979	-7.80018	9.83071	29.7345	-3.65722	25.4588	15.2857	-4.31885	40.5582	4.80777	51.0882	17.8538	21.4809	5.6809	8.48454	8.68788	31.7899	23.6927	7.88604	18.9365	11.7983	10.548	7.1531	-2.75689	-4.11844	14.1202	1.7633	29.6693	83.5872	0.821711	1.92072	15.5011	58.6749	13.4071
52.3	33.8241	76.0161	18.769	11.5091	22.6442	9.49536	23.0548	0.316109	12.8897	12.171	23.4187	25.9482	25.3502	2.80011	56.6105	26.1373	-6.465	11.5186	24.1327	-0.37532	23.8404	12.8889	-6.46772	31.871	9.31789	50.2647	20.317	20.9945	4.65287	8.46981	11.6094	31.5092	22.6482	7.52244	21.4179	8.69074	11.2821	9.02317	-4.65932	-1.75326	13.9441	1.81287	30.02	82.8521	-1.7477	3.79421	15.7667	53.7253	11.4421
52.4	38.7921	76.3023	21.3428	12.1943	20.5765	13.7635	14.7064	-3.82687	12.1334	13.4185	22.9032	28.3912	25.8753	5.10765	59.3542	25.654	-5.21129	12.789	29.0325	-2.4344	24.4843	17.6741	-9.77155	42.4288	11.6735	50.8666	15.2662	18.901	8.44359	8.59512	12.7117	37.9189	25.6477	10.4007	26.9463	6.80669	12.2535	10.7825	-4.2233	-3.3212	15.9603	-0.122021	27.0664	85.5957	1.06599	2.82667	12.6456	54.7791	13.9103
52.5	32.4424	81.5721	18.5214	13.1159	24.0942	11.4888	17.5711	-1.56846	13.1609	13.8562	22.7669	29.0796	25.8427	5.06007	53.0903	25.5732	-6.90067	8.87007	23.0865	-2.32279	23.3028	15.648	-17.1249	39.2822	11.4281	50.3712	11.9648	27.4463	4.32444	8.62174	10.9449	34.2008	21.8146	10.7983	18.9046	9.00657	9.33683	9.73475	-3.24834	-4.02858	15.6695	4.03715	27.7433	85.1999	-5.60268	5.62054	14.1524	52.6567	12.0879
52.6	28.0455	81.2416	13.8699	9.47483	19.9668	12.7875	21.6004	-1.99614	11.578	9.87756	22.844	29.5095	27.2989	8.75912	49.2051	27.1913	-4.1432	11.8929	28.1183	-3.39365	20.6134	14.6635	-25.6213	40.3859	13.0899	51.3116	10.4786	22.2434	12.8475	7.55734	12.7878	35.9834	19.1459	6.40688	24.3396	8.25035	12.3396	11.1475	-2.07541	-6.68341	17.1457	3.27074	30.0119	83.1419	0.741357	2.09666	11.2248	57.9578	9.87313
52.7	23.9643	79.7172	13.946	3.18488	16.2397	12.3228	19.2542	-0.283259	12.9946	14.4027	23.9749	34.8211	21.1116	4.41829	45.9251	30.2384	-5.20601	12.1185	24.6295	-3.72035	20.3774	19.1658	-16.2081	33.3506	7.9876	49.3485	20.2854	24.7979	2.58635	8.31207	9.1127	38.1424	17.1115	7.01553	30.1173	10.5629	11.2843	8.83224	-2.36941	-5.11254	18.4811	5.53999	28.1054	83.4494	-1.34536	3.71729	14.4631	52.683	10.7329
52.8	39.1358	80.5723	15.0832	7.99703	19.364	12.9022	15.4157	-0.692801	14.7369	13.0691	23.505	32.8952	24.4769	3.48364	48.6398	28.2034	-5.57434	12.5705	24.1645	-4.47542	19.6316	20.1148	-16.9171	30.2195	17.1103	50.6452	19.7223	19.5838	6.95643	6.87524	8.03092	36.2763	23.9486	9.33586	33.7817	12.0114	11.1857	17.0453	-3.42784	-3.09097	18.0978	3.43645	26.0542	85.5663	2.66661	2.76596	15.4451	51.8174	11.1925
52.9	31.9085	85.1676	19.48	8.19676	18.6447	13.9989	20.3671	-0.633169	11.7865	11.6388	23.4964	26.0638	16.7117	4.51485	54.8366	24.3126	-5.74288	12.9035	26.4581	-0.037643	20.4097	18.9142	-20.9145	26.1172	9.76244	51.3401	17.8245	20.3965	4.34248	7.52689	12.2058	35.1419	20.7692	7.59287	28.6399	10.1653	10.4669	11.332	-3.27135	-1.67651	17.1801	0.931916	28.0041	85.4958	-1.26108	3.77562	14.5481	54.1552	14.5976
53	32.1802	78.6657	16.2723	11.7246	20.1099	10.5848	18.3248	-1.37812	12.7339	12.6253	22.9107	33.3174	23.4708	8.90881	47.5869	24.8825	-4.7623	12.5922	24.0223	-5.9532	20.1075	15.2196	-13.4411	34.8799	13.0318	49.8194	19.501	23.8215	5.19416	8.4377	9.44949	34.5659	28.2573	6.27392	24.6406	9.76293	12.1693	11.8636	-3.32001	-5.33477	15.3945	2.05756	26.1303	86.7686	4.381	6.29774	11.2681	56.9912	10.6842
53.1	36.4502	83.6216	21.3993	12.2512	21.8456	11.3938	15.533	-1.95673	14.0871	11.4288	21.7311	29.0653	23.2422	6.1923	49.3662	28.9618	-3.74863	12.6828	26.1209	-2.3339	20.5798	18.4945	-3.54107	35.9919	11.8011	48.2268	20.6991	27.9165	8.95208	8.56536	11.3748	37.8684	22.9578	8.77252	37.6127	8.13131	10.6545	13.7229	-4.95135	-7.09852	17.1681	1.54231	27.1851	84.4365	2.78076	3.30342	13.8919	54.9718	11.472
53.2	31.8076	89.7536	21.5	5.45977	20.9591	13.7885	19.3645	-1.35102	14.2772	15.4633	22.9622	28.364	19.3087	6.51908	53.6922	25.2327	-2.94685	14.033	25.1586	-1.32619	18.4708	22.4786	-7.9404	37.8827	9.37675	50.8483	17.446	20.2917	10.0244	7.60561	12.4554	34.3786	21.0181	11.2394	40.5547	8.66921	9.81712	14.6629	-0.900399	-6.47233	20.5311	7.95996	27.5343	85.7208	0.425175	5.77766	15.518	50.1482	10.9367
53.3	35.6653	79.757	15.0887	12.6221	24.7321	13.3467	16.9351	-1.35195	12.0316	15.3643	23.7844	26.6037	22.5348	8.59005	47.8602	23.1896	-5.27346	10.7517	23.5317	-5.70176	19.4972	19.5937	-18.1941	32.7205	5.10405	52.3658	18.6253	22.7251	9.1674	9.54777	10.0904	27.7928	25.343	6.89161	27.5442	8.63217	9.6993	16.5281	-1.8541	-4.01431	15.1135	5.88497	25.4319	85.0552	1.38828	3.25806	14.2014	55.8171	12.3254
53.4	30.4832	86.8291	11.0046	7.60267	22.1417	12.0777	23.4972	-2.66873	11.5974	12.8728	21.4424	27.4794	29.3152	4.9403	48.4522	23.0878	-5.66962	12.1913	27.5699	-3.26941	18.7173	22.7344	-34.9347	39.6342	14.9046	47.1782	20.6226	22.1566	12.7269	8.6334	10.2908	40.4008	15.4206	2.44346	18.5517	8.06427	12.815	8.5238	-2.08792	-3.41999	17.8453	4.11306	25.2119	85.8634	-2.12159	3.10056	13.3644	58.3962	11.612
53.5	30.4468	84.1068	16.4517	9.5192	19.3771	11.8487	16.5159	-1.01652	11.5651	11.6125	22.3137	28.5792	24.4204	6.86459	49.3382	32.42	-5.99222	13.5544	22.0138	-0.624176	18.1784	18.5478	-11.9845	39.4579	13.2459	47.8414	19.3535	20.0698	9.17053	6.58357	11.4219	37.8881	17.593	4.67564	22.0315	9.57833	11.6718	14.1584	-2.8808	-3.64777	16.7148	6.25734	26.1209	87.6566	-3.59106	3.73575	14.4422	51.4032	14.0936
53.6	30.0962	84.5706	15.5563	7.29862	19.2415	12.3973	22.0711	-1.13984	9.4524	13.5037	22.3611	30.3394	26.3697	4.9941	55.8454	24.595	-5.63891	11.3486	23.647	-1.0523	19.8847	17.9778	-24.7844	31.2389	14.3218	47.3774	17.8676	20.5307	8.63999	8.40201	13.4567	33.0846	16.8541	7.01161	32.3251	9.46414	11.6466	9.86748	-1.64995	-2.84465	18.3564	5.86529	28.1595	86.5362	2.12219	3.75493	14.9603	52.4427	10.8551
53.7	28.3312	78.529	15.1288	8.721	18.4161	14.8257	19.3189	-0.602691	11.1576	15.3458	23.6503	27.6768	28.4309	8.45927	55.6047	27.2089	-6.51278	11.9	27.8403	0.391981	18.5314	18.2044	-10.245	31.1971	7.45597	45.7117	11.5957	23.3079	8.87593	7.59267	11.3517	30.8303	18.7842	3.54539	28.5694	7.29203	7.62487	10.2785	-0.545923	-1.27482	16.0054	5.77004	27.9558	85.0665	-0.578549	1.81478	15.0602	55.4105	13.2554
53.8	31.5742	81.9364	18.4708	3.70926	17.6065	14.4161	18.3987	-0.895537	12.3631	11.4414	27.2305	22.2499	29.0626	5.7803	43.6892	23.7392	-7.29096	11.8218	25.439	-2.87397	16.7442	21.2309	-9.47003	34.07	3.83972	50.4881	15.3385	22.7101	9.53096	6.73044	11.1307	25.5482	12.176	7.2245	26.8878	2.51083	10.2587	9.08496	0.848317	-4.7079	15.5787	1.49593	24.6102	84.426	1.42129	4.20392	10.8861	49.9406	10.6715
53.9	31.2872	77.4971	15.3573	7.518	18.7365	15.7122	25.9716	-1.42534	10.1715	13.7257	24.3926	26.0778	27.6599	7.67538	47.7341	24.7073	-5.8923	13.4017	24.9692	-1.08256	16.2686	20.8291	-10.2966	31.9887	8.35985	48.3102	11.7206	24.6572	6.26364	7.55318	12.7644	26.9465	14.107	6.4149	28.058	4.63181	8.44011	10.4765	-1.80931	-4.42055	14.7034	1.12787	24.8055	85.6098	-2.81362	2.43094	13.2765	55.6009	11.676
54	28.9082	79.9983	13.8626	14.4845	18.4525	12.102	22.7653	-0.619892	13.9624	12.2419	22.3427	23.7914	24.6521	8.70597	48.0299	29.037	-6.78354	9.89418	23.1596	-0.442756	16.2434	19.9286	-27.4974	33.1197	12.4567	48.4747	19.0967	29.0087	7.54611	6.66903	16.7247	33.133	19.8854	3.85223	28.0983	8.28945	10.329	11.3752	-4.08552	-2.55459	15.5428	0.495003	27.6782	83.5698	2.29957	3.50063	14.6059	55.5286	13.1094
54.1	30.1078	76.7126	16.6541	11.8594	23.3223	11.7949	19.0071	-3.50917	11.2513	15.0684	23.3121	24.417	27.5808	7.47242	50.2044	23.7613	-6.11616	12.4079	23.0369	2.03746	13.2338	24.0923	-12.0823	30.9611	12.3801	47.065	14.4124	25.9688	10.0533	8.24766	14.14	39.5511	15.5984	5.83596	27.1181	6.72875	12.5672	13.7785	-3.82659	-2.65289	13.2885	0.413799	29.5253	82.0022	-4.61849	5.63507	14.8065	54.0775	12.3057
54.2	33.005	79.5477	13.9077	6.27584	21.0475	10.219	18.7067	-1.72109	11.8783	12.6073	20.9734	27.826	25.9629	6.67991	55.6098	25.042	-6.6557	13.8381	23.8788	-3.19834	15.9147	21.5901	-14.9945	36.6078	10.8599	51.1552	15.8594	23.7501	4.78749	5.802	13.0282	28.2707	18.5517	9.14742	24.4604	9.71599	13.7828	9.91704	-1.40166	-4.11461	12.852	1.16108	25.5768	81.2277	-6.38253	1.30687	12.96	53.2414	14.3087
54.3	36.465	73.4735	13.5748	4.51919	19.4266	14.1666	16.4581	-1.31966	13.7364	13.2286	21.3129	28.7215	19.977	2.54859	52.7825	25.3296	-6.48176	9.98361	25.4027	2.0757	12.9328	24.0592	-20.763	39.7737	12.1736	51.9821	16.5623	25.6006	3.59675	7.35181	10.6991	27.5059	17.5351	5.69764	24.5297	7.85481	10.323	16.8575	-2.68012	-4.95501	13.6994	2.69897	25.14	81.7881	-7.00278	2.02777	15.3839	53.8856	12.7021
54.4	35.7552	80.3481	21.4714	7.72098	19.6449	12.5237	17.4281	-1.97752	12.5179	12.3417	21.575	24.9687	25.5497	3.15389	50.0888	26.0524	-4.05983	12.5529	25.6509	-2.84813	16.2083	24.6976	-22.6522	30.942	9.76305	52.7725	17.7324	17.1299	5.11593	6.66093	9.71358	27.876	18.3526	3.63358	20.4422	11.7081	10.4752	12.2489	-1.1289	-6.28971	13.8215	3.6183	27.3998	84.107	-5.17596	2.89529	17.003	51.4335	13.4798
54.5	27.3368	76.4845	19.6155	9.54512	15.2242	10.2965	18.9655	-3.40708	11.4426	19.0122	22.828	30.3765	24.9368	3.88411	42.8558	26.5015	-4.87594	12.5867	26.7992	-1.7723	14.2123	19.0074	-13.0216	32.9157	12.0956	51.9527	15.1348	17.7322	5.85256	7.83996	10.7987	29.2003	7.27337	6.25193	30.0209	11.2682	10.745	9.07273	-3.29635	-5.95469	13.129	1.4681	23.9804	76.1792	-0.232136	4.13943	15.5923	54.1965	10.7842
54.6	20.6517	77.4126	18.7816	5.63136	18.0068	9.25137	19.8573	-2.76327	11.7608	9.78505	17.7025	23.5585	26.727	0.393993	51.1133	22.0489	-3.56251	11.6806	26.8144	-5.08912	13.9336	23.5394	-22.5443	30.1541	4.20465	50.2199	11.8561	20.8123	4.55077	8.14554	12.3413	26.6554	15.1229	6.55895	16.2573	6.20068	10.5636	7.5284	-3.71354	-0.960075	13.3929	0.916396	26.8719	82.3675	-1.1469	5.60892	12.9141	50.9952	14.1681
54.7	6.14648	75.2659	23.4243	10.1537	15.9425	13.2621	16.5187	-3.90878	14.8602	10.8066	17.9028	33.9539	21.1582	5.65891	50.3699	27.4948	-3.00161	10.8367	27.1787	-2.39571	13.6232	23.733	-34.0797	28.6068	6.22699	49.3268	18.2641	20.0677	-1.0375	6.56111	12.5719	28.0349	11.3378	5.9748	17.3929	7.98132	8.85155	18.6967	-3.28004	-8.22809	15.4526	-1.33159	25.6414	81.3824	-1.79089	3.61381	16.1147	53.7008	13.3055
54.8	20.602	73.1461	18.8275	8.34427	16.7359	11.6403	18.2369	-2.54627	9.11395	12.7813	20.6693	31.0486	23.827	-0.872527	57.094	25.65	-5.93653	7.82992	21.1758	-5.12044	16.1561	21.3626	-14.7365	34.313	6.29222	47.2191	11.499	26.4579	5.02981	6.86174	14.2502	33.4002	21.556	3.33116	25.9569	12.5278	10.5012	13.9434	-4.43732	-7.24772	12.8987	2.56246	23.8609	84.0377	1.85691	0.981479	14.4701	56.2307	14.8341
54.9	17.4202	84.8222	16.6852	3.45316	22.2878	12.9983	16.3676	-2.18095	12.2532	10.955	20.9259	27.8375	21.9618	2.2479	56.3475	28.4843	-1.79611	10.7407	26.1484	-0.462413	17.0136	21.4314	-4.56611	24.4745	8.09899	47.2512	18.0465	22.3421	2.65214	6.43901	10.6422	31.9091	11.7824	1.19123	19.9919	10.2753	11.5205	16.575	-0.822762	-7.54454	16.7206	2.86393	24.8359	82.9504	-6.18718	4.35131	15.5957	52.5026	13.6541
55	25.2166	81.6466	15.6216	9.17821	21.2465	11.7448	19.1698	-1.80945	11.0526	6.70181	18.7009	26.1072	14.9627	7.41043	58.362	25.764	-3.50896	11.0924	23.0012	-0.869163	21.2803	21.6058	-3.49949	26.1527	11.9332	48.0246	17.1983	24.8763	-0.542913	7.77245	12.3548	26.8413	15.5572	3.80759	19.5763	7.6378	9.8137	16.1931	-1.43864	-2.89197	17.3463	0.735957	26.5038	83.6687	-1.59116	0.334414	14.1121	50.8072	13.5966
55.1	24.9475	78.522	17.489	6.55743	14.9679	11.0961	21.476	-2.84089	12.9909	9.64365	18.9266	27.7946	16.4897	7.78421	58.9597	23.7493	-3.60034	9.84747	25.2045	-1.51847	20.016	24.0449	-12.1725	30.4226	5.66274	47.8231	17.0701	17.856	2.65355	7.40672	12.8376	31.336	16.5871	3.51603	22.7602	9.07391	11.6838	10.2302	-0.537439	-4.24032	14.1471	-3.35088	24.5582	80.8279	-5.57917	3.87293	14.3891	56.4386	14.0683
55.2	28.2316	74.5971	16.2247	3.21134	21.8723	11.4898	19.3606	-2.11303	12.0611	8.67686	19.3558	25.9905	15.8188	4.66571	61.1379	28.4558	-3.90267	11.4242	22.6046	-1.37682	20.3808	24.0598	-3.6606	28.9673	2.81162	45.2894	12.2174	19.7954	2.73263	4.92372	15.4908	27.2665	18.8723	3.24939	32.0563	8.70969	8.96939	13.9987	-2.87408	-7.95777	11.7272	3.88667	22.4038	79.2521	-3.09209	1.62419	9.82469	51.9288	13.4376
55.3	23.5897	77.2668	18.4667	9.5519	25.3506	11.3582	11.3993	-3.28746	12.032	7.89107	19.5659	31.1906	23.9798	3.07996	59.5154	28.1061	-1.04583	7.87336	25.8989	-0.457804	18.3169	23.3677	0.833171	26.5197	8.35295	44.287	10.4557	18.8557	-0.120515	7.53791	16.6012	32.7555	16.8197	4.42761	16.4038	3.85086	11.3269	9.63726	-3.19945	-5.4135	12.7594	1.67111	23.8401	76.278	-4.14501	1.24786	15.5391	55.9857	12.9113
55.4	26.4203	80.7529	17.968	3.65271	20.8472	11.4753	16.8854	-3.22795	11.2712	10.3801	23.0819	28.0853	17.4625	2.15096	56.8146	25.8861	-1.90367	11.8601	26.8405	-4.27702	20.0881	24.8652	-3.1348	25.1865	8.81844	47.143	15.7499	20.9243	4.75216	6.98927	14.5778	36.3666	16.4072	4.55979	18.4898	5.85108	12.1691	13.7043	-1.54249	-6.91326	11.6896	-0.574775	22.5647	80.2112	3.70687	2.20269	15.4881	53.7402	14.6093
55.5	27.7157	79.2873	18.2839	4.50589	16.3167	11.3425	15.7664	-1.27973	10.2255	12.3899	22.6417	29.1701	24.5144	2.00363	60.2564	26.8337	-2.83712	10.0188	26.4476	-2.9802	18.269	26.1171	-6.5867	29.2223	7.17774	45.7627	14.8465	21.7357	16.5083	8.31405	15.2022	29.7887	13.8698	3.59172	15.3419	9.69351	9.41973	11.4258	-5.27476	-7.80879	13.0427	3.07205	27.4312	78.3906	-1.42413	5.61758	16.0803	55.3744	16.5023
55.6	27.7151	80.8403	14.9723	2.98338	18.5386	14.0756	14.7307	-2.01645	11.7926	10.1945	20.1767	30.838	20.7052	5.43187	60.4457	26.2991	-4.86383	9.77955	24.7689	2.74648	17.0174	24.2972	-3.98637	30.6302	10.2054	49.0383	14.8164	24.5351	1.04684	5.54127	14.4032	34.9563	18.0228	4.15994	19.9535	8.59705	10.0742	10.4805	-2.61062	-4.26801	11.0838	0.460101	26.0184	80.9927	-3.76298	-0.052697	16.7359	51.2445	14.8689
55.7	22.4338	79.1805	23.3278	3.24786	18.2919	11.0425	12.0144	-3.1302	13.0705	8.98072	18.7308	32.0648	21.4059	6.53024	49.2692	28.7157	-2.79999	8.65913	25.0728	-2.13996	18.2249	25.3713	-11.4189	29.6214	8.86355	45.1246	15.9701	24.4142	9.74887	5.6498	9.23848	33.5916	9.53958	4.80655	14.2205	13.1421	10.0787	12.6157	-3.6916	-4.90379	13.7952	2.23024	21.7698	79.9802	-1.00114	3.39743	15.1216	53.7036	11.4296
55.8	25.4252	78.2137	22.4263	6.90495	18.9121	10.0438	12.4033	-2.92624	13.1672	10.7574	18.8429	24.2438	20.5489	7.28189	60.407	22.0009	-3.16823	8.73213	22.9643	-6.55062	16.7906	18.1352	-6.15821	33.142	8.13329	45.9731	15.081	19.7198	9.00186	6.68467	15.3284	23.2567	11.102	0.999568	13.4695	12.5797	9.77948	11.1737	-4.24601	-7.53862	13.1193	2.16127	24.8844	82.2243	-2.35364	2.21626	14.8362	55.5901	14.9856
55.9	28.8606	82.9291	20.4965	6.10386	15.3158	9.51568	19.4072	-4.67982	12.3446	8.96233	16.3837	30.0779	20.3385	6.72686	57.4289	22.821	-3.60243	6.90255	25.5243	-0.77237	18.6228	12.5452	-8.61904	38.3186	5.98901	45.0002	15.3681	20.082	7.74939	6.64593	16.4225	31.8586	16.7377	0.765508	20.0746	12.9918	8.63222	14.1371	-0.29724	-4.7415	11.7288	2.5627	24.834	81.0381	-6.60007	1.92657	14.7772	49.7966	12.6635
56	23.2165	84.9232	21.5252	-0.0890558	20.4332	11.2942	18.4531	-4.12663	11.1233	8.50145	22.602	29.0192	20.352	1.72717	62.651	23.2275	-4.755	-0.810193	23.3904	-1.48075	17.0461	22.2785	-7.37557	33.6258	11.3518	45.0351	15.3868	21.0504	10.9083	5.507	17.988	34.1433	17.4883	-0.220789	19.3102	11.1704	11.3628	12.4153	-5.3918	-4.32513	9.90014	2.61203	23.5676	78.9494	-1.97167	5.53405	15.6078	50.2805	14.7048
56.1	26.5325	77.5304	21.5207	1.86472	23.6753	10.9638	17.5322	-4.37098	10.3569	10.7936	21.697	27.6482	17.1678	3.90272	45.6869	27.4081	-6.54714	4.16702	26.1609	-2.15139	15.5022	16.9719	-11.8993	30.2452	10.755	44.196	15.5871	20.706	11.9383	5.47012	18.0944	25.987	15.6492	0.950788	18.3381	13.3988	10.0536	12.614	-2.61269	-6.06789	12.5887	-0.74029	26.8393	81.7893	-2.07848	4.31015	15.6402	53.4942	12.9896
56.2	30.6786	76.9128	22.6383	-3.63645	21.2886	10.7589	16.4152	-2.29169	14.5677	12.3772	21.5087	29.9558	15.8032	4.81978	52.6034	25.6126	-4.20083	3.21075	21.4704	-2.33519	12.602	21.909	-5.12308	27.6083	12.2063	47.3986	16.8669	14.2162	3.46298	6.11965	11.9633	27.3885	11.6001	-0.591367	19.4994	10.3552	9.29439	11.8853	-4.36437	-1.83052	7.13856	1.72068	27.8787	80.003	-5.74875	3.99288	13.875	52.2194	15.4197
56.3	26.2513	81.5854	23.2783	1.22626	18.7127	10.8666	20.7062	-3.02367	12.9474	6.87701	19.6211	27.9492	18.3741	2.96967	51.2128	26.6723	-3.11203	1.00501	23.5992	-4.61571	16.1873	19.6016	-4.51484	37.4461	10.2078	49.2421	15.3763	18.5321	10.8241	7.37028	19.1282	38.1502	10.2643	1.70947	29.0975	8.65308	8.15701	15.1498	-1.32759	-0.616159	6.01098	0.875069	22.6701	82.2789	-5.45245	5.12148	14.4775	48.29	12.5218
56.4	20.0675	85.0775	18.7969	4.833	18.8484	11.9309	18.7804	-3.95625	12.2996	9.08023	18.9529	30.1504	16.6648	7.22645	54.7928	23.5614	0.337675	3.40424	24.1404	-5.72559	13.0122	20.5921	-13.1831	31.3271	5.27883	47.9022	13.8554	21.0413	10.684	5.53008	14.9746	28.1563	14.9983	0.373008	23.6949	11.9539	7.95017	8.3804	-4.05483	-7.25681	8.80566	-0.246334	28.4433	80.5304	-7.04606	3.92325	16.9101	50.9172	11.0725
56.5	18.0993	80.8026	17.2368	4.6485	9.56043	8.90017	20.4784	-3.98524	12.8271	11.8463	14.6629	34.6106	21.2104	8.67376	61.5081	23.5031	0.195579	7.35635	25.4876	-3.69609	15.8112	18.0657	-8.42939	31.4482	5.41958	48.2404	10.8385	21.7777	4.47866	6.68299	17.5899	26.319	8.55603	-1.72241	28.7676	10.3281	8.36193	13.6212	-5.49335	-4.74918	10.2866	3.46043	22.4286	77.358	-2.66857	2.84742	15.534	52.7617	13.092
56.6	11.1462	73.0349	19.6457	-2.79355	11.0775	5.82622	20.962	-4.33133	7.9849	13.3123	16.2323	25.9047	15.8617	6.06678	57.2413	29.3798	-2.89845	-2.28454	25.3503	-7.44115	13.3977	21.1201	-4.17942	30.1331	6.13905	44.9155	15.5159	21.3243	5.53799	7.2811	18.5882	30.1622	12.1173	-0.0554225	16.8065	10.0856	9.1099	10.9216	-5.29231	-5.59772	10.3123	-0.496054	27.8804	77.2224	-4.17686	4.45839	16.1896	52.4958	13.7848
56.7	21.6441	81.4402	17.8599	-0.581947	13.4032	9.33717	17.0932	-2.50243	11.0061	10.8498	17.9211	21.471	18.5841	4.47797	64.4361	22.3483	-2.51593	4.19664	26.5403	-4.42346	15.1603	23.975	-2.85677	33.7771	7.75518	43.0347	18.3842	15.1433	-0.843996	6.81345	18.9961	27.654	22.2298	-1.50001	20.2227	10.9245	11.3406	14.3807	-0.829251	-2.29173	6.60601	-1.98478	23.1519	80.8199	-5.5891	2.18275	14.4198	51.4256	15.1266
56.8	21.0054	84.0996	16.4547	0.300676	19.5119	8.36551	16.2406	-3.8251	9.15718	12.679	18.035	21.2366	23.4615	5.75972	59.4261	23.8182	-0.711752	9.66064	22.2399	-9.31757	15.7792	19.5484	-11.7731	25.1438	7.22844	47.1299	16.1342	20.3767	5.02413	7.4188	19.4282	31.0018	8.42962	-2.08177	18.2154	12.6915	5.74885	12.9778	-3.36334	-2.82829	4.63309	2.24416	23.6871	78.7447	-1.15282	2.50622	13.0892	53.8337	15.8336
56.9	17.3395	78.6063	17.4334	2.43854	9.63399	9.51435	18.927	-3.26824	7.49889	8.78764	17.6939	27.3832	14.1421	7.42266	53.8215	27.522	-5.2795	8.54047	22.8781	-8.0715	19.7153	19.1203	-11.1885	29.57	6.6641	46.0645	15.4942	21.0717	9.8242	5.7646	19.9716	25.7212	12.8612	-0.571627	26.0596	8.48053	8.90996	16.2675	-1.62418	0.00902611	8.98611	-5.72126	24.2353	77.9034	-5.57376	1.81554	14.1315	52.8998	11.0926
57	10.7216	77.5783	15.5275	-0.421036	15.7393	9.75757	18.3601	-4.95499	6.76008	14.1549	18.5489	24.3854	19.7296	5.34211	40.9172	24.6652	-2.66987	5.44897	22.6863	-8.7559	17.4521	20.277	-8.02739	27.2918	9.91609	43.8324	12.2809	22.7395	7.29709	4.98554	18.535	32.8717	14.9168	4.00754	21.979	12.4257	8.67037	14.5121	-2.40492	-1.77711	10.9114	-2.7769	25.3588	77.1143	-7.47903	4.21089	17.437	51.0332	14.0939
57.1	18.8309	80.8705	15.2876	-0.387564	11.6834	12.3577	18.3207	-2.99278	9.71866	9.98244	14.8679	26.1553	17.6359	6.62749	49.7508	25.8864	-3.63505	1.83297	23.1274	-12.2933	17.6638	15.4559	-2.77804	37.4753	8.92746	44.8276	12.5327	15.0787	-2.13171	7.66212	16.3244	28.8333	17.4191	1.0894	16.9961	7.68764	8.40658	12.6968	-5.47107	-5.09315	13.9073	0.376907	23.9668	76.5207	-3.94861	1.83853	17.8062	52.7501	11.0433
57.2	17.8022	81.0906	15.2501	1.5562	15.8469	8.77263	18.5466	-4.67503	10.8768	14.6451	19.589	23.2091	11.0192	5.76096	51.1488	24.2976	-3.94193	5.33327	23.5016	-12.8731	20.3608	17.4421	-39.8495	30.6883	6.52379	42.4814	12.7883	15.7274	9.26588	7.50629	16.7741	28.1453	13.7962	2.48884	23.6729	9.91278	7.91116	9.07576	-4.10523	-2.52005	8.11398	-2.82972	24.5134	78.0266	-0.697217	4.86536	15.174	51.1996	12.9416
57.3	20.6102	80.4028	11.6398	-0.356986	11.3871	6.34512	19.5309	-3.95619	8.61315	7.80197	17.3745	26.2294	17.0144	-0.550796	43.8023	24.8511	-1.35956	0.767989	22.4	-6.80841	19.4069	13.0292	-31.2875	45.3468	6.63041	41.2219	15.691	18.3655	5.96286	6.98962	21.0903	32.7496	7.11923	2.92018	21.2369	11.1323	10.3396	15.632	-3.65839	-4.41952	9.57846	-1.05698	24.2606	78.5529	-5.70026	4.15897	13.0078	52.7247	8.35385
57.4	25.2922	76.5281	8.63204	0.110863	12.771	8.68336	13.9046	-2.44014	8.0511	9.06388	19.9933	26.8037	13.7531	5.91455	50.4622	23.5098	-1.60203	7.97655	23.8578	-11.6738	19.1875	11.0081	-19.0493	38.4777	7.29563	45.1802	15.2387	20.7168	12.5204	7.06549	19.7156	29.8846	15.1383	3.95954	13.4536	9.82512	10.4355	12.3565	-8.40783	-8.30985	8.36807	-0.608838	24.0669	75.6891	-5.40969	2.64127	14.3567	53.3715	14.1379
57.5	32.8222	79.4292	15.0824	1.24564	15.8336	11.327	18.6528	-3.96943	9.01328	8.20428	19.2214	24.1392	17.1521	5.03031	54.5376	23.1075	-4.39054	7.01785	20.3841	-14.014	17.4832	10.6638	-27.6229	42.8162	6.5256	41.2334	16.4305	17.5444	10.469	4.94258	19.183	24.9578	17.9269	3.33447	17.413	10.3109	9.16525	14.4343	-5.1472	-3.54601	13.0824	-4.02733	26.636	77.5884	1.92902	3.90454	13.3851	50.6376	15.3031
57.6	22.3182	81.5364	12.0243	-1.13802	13.8585	6.27832	15.6489	-3.78565	8.5484	12.9251	21.9805	23.7908	17.0117	6.58322	58.172	29.943	-7.17655	0.148987	21.3679	-8.38439	18.9024	13.6725	-15.0696	35.8153	11.8364	45.2828	15.1164	19.4921	5.10811	5.30871	19.0959	35.9985	21.369	0.129547	19.5825	11.6621	7.58912	12.8441	-11.7556	-3.14482	9.57896	-3.69381	22.3086	77.653	-4.64777	1.23526	15.5051	49.8939	9.70619
57.7	22.5748	80.885	10.2385	9.04079	16.4042	10.016	18.2184	-5.89839	9.71808	11.5574	17.1009	23.2096	13.5593	4.82617	55.2536	25.924	-4.92877	-2.70102	20.1898	-9.16602	19.6505	17.8265	-35.8683	34.1054	10.3676	46.7501	13.2548	23.3484	-3.53274	5.98841	17.8805	24.7708	17.6264	-1.55564	26.7436	6.41559	10.0755	12.4486	-7.06	-5.99718	8.04558	-0.0650473	24.7602	77.4063	-4.89402	-0.209488	14.3688	51.782	11.4868
57.8	18.0124	82.9932	13.693	6.66042	13.7527	8.88898	18.1059	-2.32513	8.36196	6.38903	16.3549	23.0332	19.187	3.70797	54.437	23.7859	-3.77584	3.95825	25.4545	-13.0879	18.6401	14.1663	-40.6532	36.3802	16.5633	45.707	15.2882	19.9886	4.13544	3.15033	20.4167	25.0685	14.1795	0.414095	19.4745	10.2763	7.03706	8.92256	-4.45702	-5.52731	9.73669	-2.07845	26.5936	77.0738	-9.73479	1.20943	15.6686	50.5006	13.4356
57.9	22.574	83.3146	14.8186	1.01042	19.2333	8.97236	16.9821	-4.76216	10.3143	9.04582	16.298	28.9086	14.294	2.81484	52.4315	21.503	-8.39416	-6.45343	19.6775	-8.78011	17.9133	7.70799	-114.311	34.755	12.4427	42.0463	10.5909	24.5989	6.31707	3.15199	18.5386	31.4433	11.966	3.09661	12.0602	11.0412	4.94642	9.59461	-1.31488	-2.26891	8.19932	-1.46756	24.8012	80.3311	1.24922	0.566838	12.5377	48.6471	14.5555
58	25.864	79.1157	17.0377	0.0285826	15.7503	11.2413	15.7765	-2.83934	7.97959	6.80829	16.7797	26.3251	23.2147	6.94467	48.3275	23.7643	-5.33356	-4.34696	18.0301	-12.8284	19.5871	10.5641	-195.724	38.9456	12.8568	44.6234	9.17869	19.4901	7.05781	4.65555	19.1245	31.3471	9.37699	1.31664	28.4313	10.8104	6.61563	10.7351	-4.35955	-3.17864	6.10973	-1.10005	26.7287	81.9888	-1.6811	2.06159	16.003	53.5648	10.9628
58.1	24.23	82.6553	17.9291	-3.35979	16.1343	8.14705	13.8666	-3.55251	9.47677	6.55682	8.29897	27.7845	19.4876	4.89124	37.5395	24.9412	-7.98723	-6.86436	19.2526	-6.85416	19.0148	8.63898	-532.437	30.5115	8.656	42.1735	15.6947	20.8748	11.312	5.23256	17.7335	24.2045	13.2558	6.09729	18.3142	9.99377	7.98925	8.32253	-3.6343	-2.29657	7.07501	-4.72354	22.1871	79.579	2.16945	-0.867339	14.3517	47.2467	15.5165
58.2	26.2605	80.6223	13.4698	-0.299114	14.3114	7.71503	16.7809	-2.57843	8.54826	8.68493	10.7725	28.0555	19.9961	4.55006	49.3311	25.019	-7.23109	1.51516	20.6427	-9.28954	18.0354	12.3455	-597.572	32.4701	10.4553	46.2234	13.1972	20.4457	6.60383	4.76523	18.4933	30.297	17.5786	0.41127	12.8096	11.9103	7.52666	11.2478	-1.95303	-4.64377	6.31128	-1.79889	21.2266	77.3667	-3.01242	-2.92473	15.0013	48.472	14.7183
58.3	28.6682	80.4916	19.9097	-0.183898	20.173	9.11362	13.563	-3.98174	11.5429	5.55909	11.6376	26.0474	18.6777	6.04914	60.717	23.9141	-7.02414	-6.43938	19.179	-5.23477	16.1743	17.9085	-683.065	39.6632	7.82675	44.7722	15.216	21.1581	6.34969	4.99672	19.1667	28.0425	16.034	2.49315	15.0254	10.4899	7.49522	12.9634	-4.26731	-6.90132	11.5461	-2.8876	22.7866	78.2588	-2.62212	0.669168	14.4136	47.2643	12.0572
58.4	25.8195	84.8177	14.7475	7.80157	16.5271	6.231	18.6496	-3.6485	10.7497	5.10977	16.8268	17.8763	19.9972	7.14362	45.6238	25.8687	-10.4917	-5.41749	19.0977	-4.71586	16.3726	6.81352	-760.289	36.4541	13.5117	45.8913	15.0236	17.7444	-4.30531	5.87276	22.0306	20.277	21.0783	0.732243	12.9399	10.7649	5.24242	8.96233	-2.97782	-5.63917	11.0259	-1.30437	24.0182	76.0652	-5.33724	0.243594	13.1004	45.9643	16.3959
58.5	28.3012	81.5919	15.9205	2.51947	12.8375	7.921	16.8726	-4.62972	12.1778	4.75369	16.1229	18.8752	20.8695	6.14451	53.2162	23.4923	-8.29697	1.2158	15.3135	-3.57896	12.3756	6.5043	-755.478	29.6212	9.72052	49.8345	16.1729	14.6068	5.66119	6.18849	16.2947	24.2602	8.38694	1.5074	17.4979	9.96283	8.23509	5.77225	-4.97757	-6.09636	8.19975	0.70154	25.1129	77.3061	-6.36688	3.55448	13.0734	41.7686	14.88
58.6	20.8061	78.6259	22.9564	3.48222	13.7872	11.2886	18.1878	-3.90298	8.60976	9.75224	19.7159	18.1662	15.9263	7.85497	49.4647	23.2709	-9.31867	-10.5289	19.0721	-7.867	17.0706	7.69686	-807.316	31.2853	7.6136	43.1376	8.3542	22.8178	7.81167	3.55768	20.2632	32.7792	12.105	-0.215099	21.0189	10.482	8.71123	5.63588	-3.92825	-9.58516	7.61367	0.706327	26.5223	76.7017	-7.68061	-0.128338	13.9987	50.1578	15.1643
58.7	26.5819	74.566	21.5825	0.413964	8.42698	9.08484	18.6817	-6.58388	8.0855	10.9591	17.6134	21.2333	17.6279	8.79804	55.8731	21.4149	-7.66605	1.16448	16.1569	-5.65805	17.9815	11.8512	-829.08	35.3541	8.92481	45.9548	8.31735	19.7282	9.0386	5.01859	18.5261	37.839	12.9211	-0.421553	19.413	9.53674	9.45174	13.7252	-6.81879	0.364653	7.93642	-1.67977	22.3064	77.3918	-0.155012	-0.0453986	14.3763	51.2016	14.3455
58.8	25.8037	77.0663	18.8755	-0.274434	9.02621	9.44497	16.8496	-4.13142	8.54581	9.60693	17.2959	20.2296	18.5768	8.84105	61.3706	31.9382	-9.96903	1.95372	20.1201	-2.98753	17.1484	15.1874	-809.285	39.9589	12.8592	41.458	14.0588	18.1324	17.9242	5.41746	21.3649	28.4556	16.4323	1.1706	30.454	6.68561	9.97298	10.7125	-5.34554	-4.64427	9.03183	-4.11818	23.1575	78.3356	-7.22413	3.94226	17.6018	49.0888	13.2294
58.9	23.3874	77.6043	15.1507	-2.63314	12.141	5.77441	14.4452	-3.41642	7.68846	7.22751	20.9728	21.2618	17.5852	6.10197	61.0037	25.8916	-7.39926	-3.89189	19.3083	-1.11623	17.0922	10.4554	-858.154	35.5974	11.3475	43.5475	9.63726	20.0239	5.28782	3.34446	15.6419	34.6538	8.47642	1.86619	21.136	4.7172	9.04793	8.44114	-6.43137	-4.61896	6.54111	-1.77265	25.7189	75.8881	-4.9658	0.917797	16.8994	53.1961	15.0332
59	18.7415	78.4397	17.0925	-0.345223	12.9097	9.51385	18.2317	-4.07134	9.40318	4.36148	16.8422	23.8992	14.1142	6.69454	67.9407	22.618	-6.9304	1.94149	18.0688	-1.91552	18.27	12.2089	-887.209	30.0084	9.42252	45.84	13.0892	17.303	9.84026	3.78751	16.2574	32.9938	5.03942	3.98157	15.7932	5.59868	9.39704	12.756	-5.53633	-4.35213	13.9095	-0.768297	21.5935	78.2866	-2.47106	-0.343916	13.2053	49.6031	13.8619
59.1	22.8693	85.0468	18.7931	0.205035	9.91142	6.73709	17.9051	-2.61037	7.64291	6.79623	19.3208	20.7806	14.013	5.35281	59.0961	26.7618	-6.51165	3.943	20.5148	-6.06972	15.0878	6.98808	-887.114	32.7359	7.30127	41.7886	12.5199	14.6175	2.53723	4.82546	18.5296	32.5535	15.8353	3.94485	20.7155	7.8975	8.77528	10.5272	-5.14411	-6.54947	6.00279	-2.84455	23.2147	76.8506	-6.00267	1.39486	15.2358	51.3277	13.9032
59.2	26.4288	82.8749	18.4351	0.556213	8.90866	10.1065	15.693	-5.49799	5.79548	5.59628	19.1997	26.0558	11.6079	7.8232	54.7212	20.6979	-7.52357	-3.94492	19.9625	-6.7623	15.5564	8.82268	-911.684	40.6595	15.1193	43.4757	5.71104	21.4881	9.26391	4.30113	18.5771	26.7898	13.6025	-1.19309	18.2363	11.2595	7.91543	12.7257	-5.12172	-8.45538	12.1281	-1.28309	23.4274	78.2528	-3.75303	2.29467	16.3594	50.0874	11.1174
59.3	25.6259	86.0442	18.5861	-1.63895	11.4504	5.37456	12.744	-3.62429	7.58659	0.932185	22.8853	21.1487	14.9344	4.98666	63.7421	26.9307	-6.16638	-8.42695	15.6697	-6.97993	17.4768	-0.198597	-903.062	46.1501	11.1269	42.0293	4.60413	14.6158	7.15084	4.64906	22.6055	37.1634	8.49756	0.590498	21.3095	8.94436	6.72325	7.7693	-6.20141	-3.81398	6.69154	-0.218919	22.4869	76.4967	-3.69472	0.590407	14.1749	48.8142	11.9748
59.4	19.1749	83.8509	21.8118	9.45346	14.5566	8.67918	15.2366	-3.07091	10.1719	6.09012	21.6463	28.9659	9.08042	5.05468	57.6504	28.4803	-6.83907	2.36105	19.8418	-2.68214	17.4639	5.87956	-949.028	37.6272	9.76932	43.0296	4.96092	16.7338	7.172	5.07692	20.2438	31.8325	18.2062	3.80647	13.0444	11.1676	9.18262	7.113	-9.98243	-3.14962	6.01235	-2.22091	21.471	78.3195	-1.18082	0.494636	14.2921	48.7358	15.5904
59.5	18.9748	74.2715	17.105	-2.44362	9.69008	6.05346	15.1015	-3.19797	9.29386	4.85037	20.5034	20.0847	17.3371	6.61566	57.85	26.8334	-3.16418	4.51007	21.7388	-2.25894	16.9704	11.6685	-937.61	37.1473	8.1691	40.6736	4.48806	13.7881	12.9579	4.34381	15.0673	32.1922	11.6003	0.956334	19.9274	13.8629	6.55663	5.69478	-9.54453	-1.95928	9.78817	-3.42528	24.3339	77.8106	0.763957	1.55287	16.1266	52.4005	11.836
59.6	19.8768	83.9417	19.2407	-6.4071	10.841	5.5648	17.052	-3.36595	8.41432	7.45037	16.6664	23.7687	14.7488	8.82455	65.0724	23.3834	-6.2647	7.74758	19.5808	-5.7042	14.9553	9.36435	-963.215	35.8247	10.7375	41.2077	9.10519	18.0279	3.42127	3.34381	18.5201	28.1818	9.68391	3.07267	20.354	10.1933	3.07076	11.9969	-8.2929	-4.76171	7.6991	0.213486	23.1284	78.3407	2.58778	1.02335	16.9688	49.3174	12.7083
59.7	17.7286	74.2329	15.9611	-2.49878	16.3227	7.67326	14.0682	-1.76479	8.07902	9.51089	17.0694	24.5863	9.7791	7.37513	61.1346	26.8747	-8.95528	8.18939	16.0939	-4.60283	15.7788	9.64064	-979.74	40.47	7.64373	41.2168	11.4048	17.3453	4.83119	5.17393	19.0128	23.2266	9.98609	-0.344053	23.7222	9.48525	3.76907	11.2732	-6.0034	-2.44796	8.83469	-1.41938	22.4511	78.7474	-3.36636	2.90958	14.5367	49.7232	11.8084
59.8	17.1794	81.0283	18.7143	2.21907	15.767	10.4374	14.829	-4.19207	7.93495	7.677	16.3299	21.1911	21.6046	6.79211	56.3271	23.749	-4.85081	5.97992	17.1633	-4.11044	13.2784	9.47373	-1145.05	43.9253	13.2875	42.2659	11.3021	15.7715	8.12044	5.37409	13.5453	30.7306	9.52729	-0.342947	16.7783	7.24668	8.45503	10.1365	-6.91035	-4.44042	5.77564	-3.37322	20.4876	76.8349	-0.88863	-0.0286692	15.5647	51.0692	15.2435
[truncated: 28 more columns]

## Sheet: Figure S2B-D
Figure S2B: % Current suppression
ACSF	CTOP		TIPP-Psi
Ba2+	Ba2+	Ba2+, ZD7288	Ba2+
63.0538	85.8239	83.8996	81.8584
82.8842	76.2871	84.2708	78.7329
53.3141	65.6703	41.0649	98.8767
83.6176	90.0615	76.1487	10.9691
73.448	67.9213	51.2028	26.6214
43.9088	13.7106	76.8793	92.034
69.093	58.4466	74.2347	62.0456
73.6728	64.3345	87.7146	85.2133
	-3.65082	90.66	60.8296
	77.6477		43.4989
Figure S2C
Fluorescence	Peak (pA)
203.141	5.22436
214.474	17.7448
201.117	8.85245
163.941	2.21317
171.305	7.67911
223.098	8.05708
349.856	35.4662
342.265	48.5448
755.67	46.9292
175.72	47.3987
174.808	5.57279
367.793	56.8283
282.547	27.4618
788.727	90.3688
538.136	78.0757
724.897	76.1544
Figure S2D
Fluorescence	Tau on (ms)
214.474	1112.71
223.098	526.499
349.856	662.577
342.265	560.215
755.67	203.571
175.72	791.64
367.793	465.884
282.547	650.271
788.727	162.656
538.136	373.129
724.897	296.171
