# Supplementary material for: Convergent, functionally independent signaling by mu and delta opioid receptors in hippocampal parvalbumin interneurons
Source: eLife. 2021 Nov 17;10:e69746. doi: 10.7554/eLife.69746 (PMC8716102; doi:10.7554/eLife.69746)
Supplement: Figure 4—source data 1. [file elife-69746-fig4-data1.xlsx]

## Sheet: Figure 4B
Time (s)	ACSF									CTOP										TIPP-Psi											CTOP + TIPP-Psi
0	0.135115	0.523443	2.02037	-2.02202	0.732009	-3.95852	4.09863	-2.54483	4.6463	7.10973	2.36663	-0.97929	-0.73728	-3.64619	-2.80048	1.23033	-2.02653	-1.73304	3.72348	3.50842	4.43497	0.216611	-5.80243	-0.36097	3.92103	0.793373	-5.93955	-1.12238	-10.1148	-1.70262	-9.85556	4.08764	-0.0652	-10.0266	3.79416
0.1	-5.98635	-0.36086	1.26933	2.75949	-4.09591	-2.01244	-2.06008	1.44962	2.64505	7.90738	1.78706	-0.74333	7.40811	-1.39627	-5.71411	1.33867	0.85291	1.31555	1.55286	-0.40483	8.07899	-0.25675	-0.68007	2.10557	3.75464	-4.65516	3.28568	0.116782	-4.88671	-3.51838	-9.92001	1.11828	2.16199	-11.3473	2.15386
0.2	-1.99632	1.48349	4.2891	0.41992	2.19685	0.749024	-2.91077	0.603024	-8.99168	6.15198	-0.11168	3.02798	4.57633	0.947226	-4.98132	-3.24073	5.92633	-3.04227	4.2417	2.65134	4.85395	5.67493	-6.18377	2.14712	2.71272	-3.31378	0.281295	2.09705	-6.63634	-1.26528	-2.35963	3.35304	-0.60103	-5.56513	-4.48974
0.3	1.64244	-1.53195	1.59184	0.725406	0.490296	-0.26029	0.107934	1.24608	-3.01083	9.29583	0.818843	-5.51558	2.19113	-1.68423	-7.93506	-0.05582	-2.34184	-2.38457	-0.91661	1.65479	4.63739	-2.93445	2.92453	3.89787	0.049167	-1.80221	4.04094	2.76439	-3.89499	-3.28122	-3.48474	-2.24408	1.93883	-2.49136	-6.02861
0.4	-2.05168	2.18941	2.11212	0.685378	0.955876	0.60235	2.16711	0.8098	-3.58294	4.65625	-0.62918	1.79165	-0.74981	-0.02731	-11.9709	-3.14827	2.38508	1.21905	4.39744	-1.2654	5.70742	0.592088	-1.46903	-3.65741	0.097867	-0.66413	2.68711	0.655424	-5.01825	-1.60793	-5.62043	1.0974	-0.55991	-10.8836	-1.90752
0.5	-1.12596	-0.85127	2.00705	0.485601	1.59869	-2.53263	1.94793	-0.32488	2.00852	7.49368	-0.25107	-5.50968	-1.20229	-0.88716	-5.80872	-4.50094	9.28357	-0.00431	2.73928	3.86281	0.489972	-1.63296	0.961154	-4.63657	-1.06069	-3.31339	4.99477	-4.46988	-5.61496	4.37222	0.975668	1.38344	-0.26904	-3.40805	-2.90427
0.6	0.800219	2.39936	0.846281	-0.4699	1.15032	-1.11806	-3.33065	1.10978	-2.11772	6.75949	0.083667	1.81433	-2.60599	-1.05652	-4.83948	1.1882	-5.80837	0.754663	6.66061	-0.59638	11.3173	0.247759	5.93742	2.07541	0.467282	-7.47531	-1.84019	4.42078	-6.29186	0.636194	-3.39439	1.65661	2.15601	-12.2947	-0.81084
0.7	2.24357	0.890272	-0.259	-0.3167	-1.94904	3.58483	-1.97107	0.294583	0.741319	7.83565	0.427625	0.987975	-7.4119	-1.16469	-10.3473	0.746838	2.18023	1.66448	3.71361	1.33234	6.20316	-0.43486	0.816161	-1.81153	0.61158	-6.80401	0.303139	1.49706	3.12784	-3.62832	-4.54396	3.08675	-3.9326	-13.8925	-1.62115
0.8	-0.98952	-0.73859	1.03367	1.22931	-2.36666	-0.35844	-1.98245	1.02735	-3.22903	7.00128	0.991367	-0.7968	-0.57769	-0.46119	-4.16939	-4.86726	1.47477	0.770549	-0.2592	1.2334	4.7438	-1.21035	4.27057	-1.29052	2.95506	-5.5821	2.66131	1.61959	-4.96193	-2.09928	-2.21774	5.2729	2.81954	-8.22492	-3.63247
0.9	2.74878	0.571677	1.08811	0.38209	-1.61645	0.93906	-1.76528	-4.40451	-4.03869	-0.74684	-0.29695	6.07872	0.884094	-0.93163	-0.282938	-1.06499	10.0005	0.370333	-0.52314	2.43198	11.0316	-2.98295	3.89265	-1.51744	2.23488	-3.50204	-0.00479	0.340903	2.62652	1.05561	-0.581198	1.91478	1.56752	-8.5775	-0.09705
1	-1.85579	-1.35131	0.970357	1.2892	-2.95067	-1.07661	-1.15157	-0.05743	-8.73009	2.37463	0.191157	-4.95615	-1.23773	-2.63145	-2.37399	2.01451	5.88365	1.71863	-2.43448	2.82123	8.66097	0.420143	-2.22543	0.052966	-0.50599	-3.53956	2.2859	9.89945	-2.27328	-3.44882	2.65537	1.90647	1.2621	-5.56829	2.57557
1.1	-2.37277	0.032966	3.22649	1.60917	-3.4633	1.30547	-2.14852	4.39463	-1.94038	-0.76379	-1.10381	-5.06929	0.139768	-1.55029	3.76249	5.87852	-2.24211	1.4802	-9.64227	4.92219	10.3686	-0.24791	-1.37287	2.9329	2.42131	-5.80433	-2.46754	2.10991	-3.68001	-4.8306	-7.09962	3.96801	0.266699	0.834803	-3.54069
1.2	-5.91738	1.09252	3.89802	2.40142	-0.44215	-1.20442	-1.70363	6.80576	-6.94485	1.45788	2.51021	-2.63472	1.82076	-0.96828	-0.257911	-6.39243	4.57447	1.02144	1.08393	-1.53536	5.05429	-4.14047	3.361	-2.64117	-3.84974	-5.07518	-1.66512	2.55744	-1.65763	-3.15053	-11.8978	0.504196	-2.20607	-7.99206	1.27637
1.3	0.360415	0.032188	0.238324	-0.22786	-0.24056	0.649112	-3.83738	3.4132	-7.44811	0.541797	0.43191	0.463273	2.00467	0.205805	-7.48446	-2.61667	5.90291	0.081525	-0.92395	0.293952	3.47569	-4.01376	-2.94591	1.24427	0.946384	-6.28737	1.98684	7.96912	1.60376	0.88284	0.116699	3.446	-0.36024	-5.61875	0.399564
1.4	-4.16472	-1.09649	0.054073	0.271937	2.43935	-1.55389	0.942068	-0.59789	1.85932	-2.04173	0.045198	1.10784	0.469166	-1.95582	0.267256	-1.52626	-3.09633	1.55421	0.851934	0.732894	1.02602	3.44195	1.81709	-0.71345	1.45316	-0.55727	-1.1563	2.15259	3.79669	-4.80449	-3.14051	-0.63054	0.25137	-7.91516	-2.25272
1.5	-1.00556	-0.66796	-1.26995	0.86989	0.130199	-2.66158	0.868802	5.1009	-8.52502	2.39225	1.56189	0.619481	5.69332	-1.32867	-2.21729	2.12267	0.568631	4.29325	-1.1718	0.830035	6.4625	-0.00965	0.880086	1.10014	-5.62177	0.427619	-2.44577	7.11352	0.387211	-0.6554	-0.107461	-1.9676	-1.94999	-7.08093	2.63854
1.6	-3.96292	0.837685	-0.76464	0.703239	-0.51284	-4.15332	0.602154	-0.31422	-8.17325	2.36615	1.39056	1.28735	-1.70394	-1.61844	2.08358	-1.47907	4.23101	1.59083	-0.05577	0.28117	7.0907	-2.43331	0.801113	-2.79587	-0.38887	-3.96627	4.72318	-0.37269	3.31329	-4.66473	-0.115574	-2.15542	-0.38037	-6.3262	-3.1991
1.7	-5.95181	0.240022	1.58279	-0.67408	0.83968	-1.1733	-1.24309	0.283605	-3.4425	1.36304	-0.09061	0.399941	-1.89331	0.851026	1.57915	1.89339	1.93733	-1.56726	2.266	1.50039	5.44585	-0.85635	-6.66142	-1.02313	-0.99186	-5.2584	-4.05819	-5.28467	-3.16837	-4.55041	-8.24285	4.56772	4.01833	-5.00843	-3.41652
1.8	-0.64725	-0.7689	1.17061	-1.6448	-0.10548	1.19043	-3.339	1.42933	-6.06212	-1.79229	1.33993	0.283446	-1.16166	-0.3384	6.58969	5.1349	6.66063	-0.69055	0.627334	0.662913	5.14897	-1.22901	3.26682	4.35421	-2.27485	-2.4906	-0.02359	-2.58055	0.296907	-1.6243	-6.20447	-3.01488	3.06489	0.495668	-2.49758
1.9	0.355992	-0.72318	3.43371	0.016896	0.582897	-0.68759	-2.17483	-0.07325	2.59649	2.02664	-1.13115	-2.26286	5.60309	-0.92156	4.57428	-7.57884	1.9495	0.658286	0.567757	2.49456	8.86716	3.13121	0.475287	-3.03447	-0.14842	-2.15238	1.50352	-0.39732	0.070208	-0.10248	3.59857	-1.29016	2.65076	0.522012	-2.53516
2	-2.06273	0.611728	1.29225	-0.39635	2.4362	0.180403	-4.55044	-0.80387	-4.579	0.454901	0.252674	-0.23135	0.656235	-0.61465	4.91055	-4.88002	-3.86818	-2.41902	-2.36006	1.74705	8.12977	-0.91983	7.09341	0.516082	-1.66055	3.02554	4.15194	2.01032	4.70713	-0.43105	-15.8959	2.98851	4.07322	-3.50828	-2.23371
2.1	-1.47734	0.198525	-1.05053	0.080064	2.78551	-2.03641	-5.91798	0.864471	-6.84515	-1.38548	-2.1549	1.45172	-1.70826	1.08458	3.77165	-5.78815	-8.22972	-2.21624	-7.63154	2.77201	7.44045	-2.74968	1.9859	5.20465	1.85057	1.50221	3.77157	2.44775	-1.27907	-4.91505	-10.4668	-1.36485	0.552816	0.600539	-5.67785
2.2	2.24271	-1.74045	-0.81606	-0.2873	1.9125	-2.8645	-3.17214	0.582224	-4.53522	1.41062	1.03886	5.61717	0.455327	-1.1154	1.11916	-1.38589	-0.78519	-1.23047	-0.58717	2.28912	7.39114	3.10129	-1.89449	1.38038	-1.4186	-2.27996	-1.15514	-0.18641	-0.55976	-2.31579	-1.98496	-3.28656	0.595623	-0.0149	-2.21063
2.3	1.24728	-0.24243	-0.97938	0.914827	2.20696	-0.73947	-2.55485	-0.404	-1.23182	-2.57866	0.821188	-0.51771	-0.76737	-0.98776	7.93733	-2.08607	-1.49142	-0.95146	-3.8949	3.22621	5.94105	1.13196	4.7103	-5.39238	-3.68916	-0.56385	-0.62987	1.6699	-4.33886	-1.07984	0.612094	-2.23005	1.1391	-1.70087	1.43299
2.4	5.00743	1.18119	0.449632	0.312123	-0.10141	-0.42451	1.15543	-3.52996	-0.12155	-0.23349	1.53589	8.26002	2.12836	-1.45716	3.18603	8.52051	-0.92463	-2.53064	-4.04214	-0.02247	11.9106	-2.41786	-1.55772	0.381618	-1.86531	-3.37626	4.0858	1.92546	1.20851	-1.33443	-4.50793	1.63988	1.55897	-1.10729	4.99407
2.5	-3.72083	-0.39855	0.399081	-2.3752	-1.293	-1.68306	-3.68221	2.11019	6.14425	-3.33923	-0.24144	1.54379	1.76679	1.06037	-2.63093	-2.66831	8.98553	-0.83237	-2.28604	0.600173	2.19586	2.13435	-2.49498	-1.65132	-0.30447	-1.75798	-0.64618	0.916008	-2.92924	-0.71042	1.04081	0.165896	1.88902	0.364344	0.383055
2.6	-0.00045	0.40139	-0.13565	0.327183	-0.55022	1.35078	-4.11891	-2.60588	4.66952	-2.28392	0.138993	1.04498	4.28116	0.171748	8.0208	-0.30412	0.962627	-1.02363	-5.58586	2.87444	5.30194	8.24634	-4.31359	0.596806	0.824921	2.0423	0.466356	-0.02737	1.35132	-1.01303	1.16426	-5.22515	-2.79262	0.266899	2.22452
2.7	-3.31236	-0.36474	0.51575	-0.95023	-1.06327	0.861422	-2.41034	-1.82761	-5.03056	-0.48847	1.28546	1.06332	4.19405	0.583051	-0.00310604	-0.38203	-0.327	-1.63128	-4.55897	2.36778	-4.40919	-1.95795	-8.43286	-0.32121	2.69542	0.369579	4.79854	-1.04577	5.19997	1.80775	-0.55922	4.19061	1.67132	1.23326	1.35362
2.8	-0.39189	-1.64326	3.58466	1.421	-0.40209	1.2302	-3.73542	0.441061	7.94157	-0.68217	2.70666	-0.05081	-6.77349	-1.14543	2.51213	5.33372	1.34888	-0.03041	-1.3012	1.24288	-0.62633	2.57469	0.369297	-4.8316	7.9362	-0.20327	7.24948	4.1974	2.26998	-1.11476	2.4656	-0.23386	2.91417	3.08354	-2.92561
2.9	-1.58589	-0.40776	-1.23637	-1.35138	0.656214	0.223775	-6.90158	-1.30568	5.85621	-2.5144	1.58762	2.38467	-2.63982	0.857274	-2.84319	2.7091	3.27337	1.55621	1.97213	0.4373	5.63754	4.27777	-4.37852	0.31747	0.871669	0.586659	-0.3562	-3.02187	-2.69256	-0.3945	1.60847	1.10548	0.951808	4.83663	2.56691
3	-2.01251	-0.2189	-1.00503	-0.16629	-1.08075	-0.02733	-2.97571	-4.98204	-1.664	-1.36826	-0.37078	-1.00784	0.725641	1.13072	0.490988	-0.24995	8.49183	0.454185	-5.14351	4.24227	0.20196	-1.05893	-0.01122	0.806525	5.27121	1.87826	-0.08133	-0.11532	-0.59729	0.385219	5.25077	-1.401	1.06095	3.94884	0.771657
3.1	0.459985	1.00173	1.86909	0.285273	-1.41053	0.862505	-0.97259	-16.1839	-2.06931	-2.53957	1.97825	-2.23943	-0.79189	0.444157	-1.37286	0.72873	5.38315	-2.24862	0.295674	4.27509	4.23974	4.40522	0.692735	3.45784	1.76768	2.84995	-3.12841	-1.18646	-2.02234	3.80115	2.79879	-2.57471	-0.10387	-0.39927	2.43065
3.2	1.48956	-0.90359	2.54016	-0.63762	-1.23801	-3.05225	-1.7662	0.757079	-0.19592	0.026747	-1.46521	3.28071	-3.74842	1.31623	-4.14131	1.81688	-3.25015	-0.44552	3.87173	-0.19382	0.394139	-0.94278	-5.54067	0.114044	0.308238	-2.8334	5.29714	1.01466	0.918352	0.825878	2.02259	-0.15512	-2.14597	11.5458	0.226874
3.3	-1.7421	-0.88179	0.078743	-0.2275	0.012525	-3.54538	0.298505	-0.71429	-0.19301	-4.36819	-1.50533	-0.95334	3.21277	1.10312	-1.35259	-1.70507	3.54762	0.583589	0.772903	1.99397	1.13567	-0.30741	1.70178	1.43081	-1.04663	2.27938	0.744616	0.425058	5.40748	-3.55217	4.12625	-2.04173	2.84172	-0.32811	0.145489
3.4	0.945578	-1.40039	-3.14532	-0.52871	-0.81965	1.9412	-0.60986	-0.04746	3.40515	-2.00589	0.896259	-2.59832	1.65096	0.158738	-2.21947	0.188849	-5.47773	-0.61609	5.32892	4.17211	1.43702	-0.64758	0.785961	-0.85821	2.41967	-0.54028	0.286831	-2.09147	1.39561	0.312977	0.589607	-2.97233	-1.08355	-0.78299	1.58298
3.5	3.57079	-0.93745	-3.48721	-0.54519	-0.80053	-0.8392	0.135202	-2.07403	2.5108	-0.52415	-1.697	2.01084	-1.12258	1.5011	1.99172	2.11304	1.12129	0.022466	-1.10042	1.76064	1.58603	-2.27036	-0.53459	4.6614	1.81077	3.00374	3.98652	-3.51985	0.515508	0.179559	5.72681	-2.40764	0.41013	-1.89666	-0.59896
3.6	-2.40977	1.05796	-0.06892	-1.82339	1.01116	-0.49605	1.0987	1.62375	1.24573	-3.35555	1.01305	1.91498	4.21701	-0.36776	-3.44234	3.77961	-1.17124	-1.80784	0.273293	-0.64274	3.63708	-0.28697	-4.44613	-3.56522	-0.4558	-1.7483	3.25591	-3.85599	-1.32457	-2.45513	2.61566	0.671439	-1.76806	-2.73207	-0.8582
3.7	2.0568	-0.69111	0.711183	-1.54039	0.195233	3.15674	3.16332	3.62702	2.03767	-3.06902	2.62567	2.70433	2.50518	-0.25061	4.41221	-4.79631	-0.58406	-5.37213	1.22625	0.733596	2.82396	-0.65403	1.02171	-5.74875	2.41627	-0.57483	5.7013	-2.30643	4.32358	1.21111	7.04453	-1.00743	3.64263	1.41044	-1.88342
3.8	-2.1449	2.1668	1.01701	-1.67718	-0.52938	0.957252	5.5958	3.75926	-0.08227	-0.20684	0.524056	2.20703	-2.01002	2.32878	5.12451	-2.4881	-4.76405	-0.19021	0.116207	1.46245	-3.58656	0.932353	2.63521	-0.31234	3.8842	1.50202	1.31489	1.08991	3.42492	-2.21792	5.05231	-2.4025	2.081	-1.23689	-1.39926
3.9	7.02118	0.171488	-2.21049	-3.3135	-1.68169	-1.33138	10.5247	-1.93443	3.60628	-1.96263	-0.30481	-2.99861	-1.1481	0.934429	0.195802	-0.30488	-1.53737	-0.60873	0.243767	4.86469	-2.29178	5.12771	-0.42379	4.62246	0.599823	-1.39557	4.44063	-1.10941	0.559123	-1.0617	7.13826	-0.71039	-2.69127	-0.66079	1.02617
4	2.01565	2.05714	-0.3435	-1.65487	-0.19582	0.322019	4.16957	-1.26234	6.41343	1.14575	-1.73185	-3.75257	0.956054	2.12409	2.02943	3.36236	-5.44	0.475199	-1.62506	1.97041	-6.27884	0.047069	8.90719	-2.06959	1.52816	0.209546	-3.02944	1.9464	-3.80607	1.12394	-4.38277	2.52624	0.47117	-4.04428	0.921113
4.1	-2.89197	0.00203	-0.54357	-1.72252	2.27572	-0.47422	3.14149	-5.60384	6.97332	0.380913	1.1011	3.44484	2.47614	0.998761	-0.834262	-0.7405	1.78509	1.9088	0.628588	3.38328	-5.11479	-1.08088	-3.05789	0.934124	-5.25083	0.937803	1.6411	-0.8103	-5.74872	-3.22694	0.934937	-0.79297	-2.56893	5.77797	0.581186
4.2	0.289433	-2.3941	-1.33908	-0.3038	0.743828	-0.54792	4.53562	-1.23667	11.4151	-3.20842	0.179971	1.55501	0.020089	1.29094	1.03865	-7.56351	-1.9221	0.317355	8.54657	1.42463	-3.74716	3.96429	2.66318	3.82342	-2.82862	-0.86035	-1.22759	-0.92027	-1.38754	-0.88093	3.80807	-3.40216	1.50308	1.58286	2.04189
4.3	5.24135	-0.65539	0.13585	-0.66259	-2.54005	0.448619	2.42825	-0.66502	6.24344	-1.82097	-0.01347	6.54221	-8.3009	0.433786	-1.89749	-0.07362	0.367317	-3.35871	4.22799	4.39402	8.63431	-4.73304	2.57473	1.32865	-0.93414	0.387146	-0.38161	0.797777	1.57357	5.6346	1.63027	-3.36546	-3.48903	4.60609	0.948906
4.4	3.36827	0.290074	-1.07644	-0.97991	-1.32291	-0.65008	1.4862	0.778789	1.96766	-4.99509	0.715961	1.78679	-2.30935	1.69808	-3.42624	0.875101	-1.66396	-1.30356	0.397197	3.75714	-1.19198	-1.82244	-4.51209	-0.49514	-2.52369	1.0191	-2.77249	0.847008	0.011969	0.499096	2.85974	-1.09053	-4.08355	0.245964	1.88354
4.5	0.502942	-1.03003	-2.13197	-1.41478	-1.18285	-2.02231	1.9895	-0.56428	6.76975	-5.40213	-0.91752	1.26223	0.705984	0.709376	5.89064	-1.89884	0.264855	2.64452	0.174185	3.58707	-4.13058	-8.29434	-7.85202	-1.77705	-3.31656	-0.48491	2.93141	1.37288	0.323431	-2.59063	-0.170333	-6.15187	-2.41963	8.36665	-0.68411
4.6	5.8665	0.611686	-0.12356	-1.04163	1.99171	0.318071	4.60708	-2.74812	9.60488	-2.52847	-0.55878	2.00638	-4.47005	1.77343	2.58287	-3.26738	-1.8706	1.36469	0.207222	4.18541	-6.78959	-0.29883	-2.56575	1.6141	-2.28929	-5.09136	-0.21449	3.50615	-9.94017	-0.73878	-0.428647	3.51714	-3.68801	1.69799	2.3121
4.7	9.81056	-0.69579	2.05261	-1.87292	0.404131	2.59504	2.21129	-2.02232	6.34346	-2.72535	-1.26552	-6.01953	-2.59924	0.292616	-3.24039	0.751176	3.25678	2.1729	-0.32929	1.1726	7.41819	-6.97326	0.842582	-2.60849	1.34319	-1.03783	2.95728	3.29889	3.2644	1.53791	3.23891	0.971241	-0.19497	-1.51439	1.51609
4.8	3.70309	1.05278	-1.79599	1.56308	-0.04887	3.06401	2.4965	2.49433	3.95551	-1.74204	-1.8586	4.30749	0.902503	1.95769	-4.22271	-2.02685	2.51557	-3.21198	1.13019	5.75281	-3.75811	0.650868	5.62255	-1.82888	-6.0148	-1.46886	-0.16874	3.349	2.05298	4.18058	4.37806	0.764529	-0.70107	3.37096	2.8411
4.9	0.444308	-3.63908	0.186529	-0.99187	1.02438	1.84819	6.45436	0.513731	3.76474	-3.12707	-0.6905	-1.79371	-3.19721	1.95843	2.26659	2.00231	-0.73884	-2.99952	6.07516	4.93291	-5.2082	1.45765	1.80747	-4.41466	-0.1718	-2.26533	1.78123	-0.32884	-1.34103	1.23148	-1.757	-2.5655	-4.78538	-1.17058	2.97195
5	0.658965	0.603641	1.42996	-1.61464	-1.41888	2.99742	6.92291	4.07283	8.48392	-3.45375	-2.33774	-1.62363	-0.53092	1.64381	1.40517	4.06582	0.895723	-0.07247	2.66745	3.73312	-10.6141	1.12622	-0.84594	0.23125	0.801472	-4.39686	0.50377	-5.20482	2.26927	1.82426	0.641975	-1.35788	3.5914	3.11204	3.6994
5.1	2.00137	1.45178	1.74034	-0.12462	-1.70581	4.48762	7.58695	-0.01788	6.19121	-2.7814	-0.92605	-1.45905	1.37524	1.18348	6.48744	2.28244	5.76902	-0.18713	3.45077	5.81146	1.57634	-3.21146	-0.1769	2.12276	-2.29407	-4.02917	4.61827	0.094261	2.78287	-1.04204	1.6459	-0.2698	1.65393	2.9951	7.26153
5.2	5.3699	2.03494	6.83434	-0.40655	2.8784	6.60714	10.5429	6.40157	11.9621	-2.02013	2.79707	10.0189	7.90251	0.89694	13.1768	22.1645	26.0499	7.97879	9.15187	4.14673	-6.91599	4.64817	4.37112	1.65319	-0.94676	-3.56241	3.00496	0.655746	2.15159	-0.27079	-0.455193	1.71713	-0.78476	2.65303	4.02972
5.3	10.9056	4.8266	17.3745	1.76921	18.2861	17.8696	16.4864	14.5867	18.8994	5.83938	4.49507	12.4401	4.80828	1.37424	13.8305	43.2054	68.4169	9.27069	20.0748	4.96018	-4.86327	10.5347	3.08887	-2.59485	11.5582	-3.46089	4.48949	0.762321	-3.24817	6.0586	0.541645	0.092762	3.17211	5.26252	-1.47973
5.4	14.6542	7.63517	30.8609	1.28426	29.1893	29.141	27.1907	24.0317	27.4926	4.26591	13.1215	24.0629	8.6362	1.39113	24.0758	50.175	96.5914	16.6352	33.6347	8.39412	-3.90811	11.2267	9.34264	-4.14153	22.752	0.364716	3.21313	2.84502	-1.17053	11.4093	3.10419	-0.60832	3.45861	3.69084	4.15633
5.5	28.8677	13.9216	45.3075	3.1481	38.6036	43.5406	31.9693	31.8097	32.7004	6.69572	20.9648	24.6337	11.3343	3.37481	29.3223	62.6082	106.247	19.0655	44.3939	10.0333	1.28564	13.5418	10.0258	-0.27623	27.1011	5.6141	2.78009	3.06203	10.6592	21.6644	7.05416	3.47358	1.54791	-2.95505	-0.31952
5.6	37.2198	17.396	45.4971	4.38763	47.408	49.7261	41.0409	44.6985	38.2943	13.4586	33.8401	34.5806	8.63119	3.29884	31.2108	71.473	115.994	22.7731	53.5842	9.48125	-2.53515	27.3223	5.32478	-2.60486	26.8179	-0.14347	5.3654	5.21155	4.91357	27.6986	3.11105	1.59914	0.475607	2.88073	9.33932
5.7	45.2343	23.4582	48.5592	5.36576	54.7737	50.7279	43.2322	45.4601	36.162	18.598	41.7375	39.2954	13.0555	4.74597	39.273	80.2148	123.194	26.7685	66.7866	13.0951	7.75303	23.0185	12.54	-0.75624	38.2176	3.16168	8.32891	4.47958	5.95134	30.549	6.17085	-0.86889	1.81298	-0.58835	2.32581
5.8	46.3904	29.6091	60.755	6.14353	62.3014	51.8698	52.4692	53.8743	38.2604	23.1209	44.8448	41.7032	15.6422	5.51234	39.7621	86.9152	134.702	27.4154	66.6788	16.4329	1.66562	26.9201	10.6264	0.448867	44.3603	5.08586	11.3451	5.45728	7.60213	36.2026	0.0214279	2.90923	1.23712	0.780369	4.18157
5.9	44.3831	29.4587	61.8423	8.5632	65.4775	60.5915	53.5186	56.3807	41.1771	25.3539	48.0642	44.8912	13.9077	5.99083	43.3454	92.8922	140.728	29.2535	67.0095	18.1322	12.0927	24.6682	12.8414	1.57509	38.4038	6.06426	10.9633	8.53191	8.30993	30.5848	3.79909	8.3827	5.42459	-2.79233	1.90103
6	57.9297	35.7046	64.4866	10.065	73.5471	58.9337	60.4824	63.0776	49.0946	32.2879	53.7233	52.8491	17.6186	5.24435	44.6238	96.8908	138.499	35.3817	64.7955	18.6719	7.70186	23.9085	10.9948	-0.42451	45.4537	6.88576	9.2446	11.3549	12.2648	35.1735	7.20518	2.04617	-0.54406	1.6636	6.55142
6.1	52.6625	39.1043	64.7992	11.2365	76.2633	61.8824	60.3497	69.011	48.6722	35.991	58.1303	58.4001	25.0499	7.64122	34.6144	101.07	137.359	34.7139	75.8033	16.6806	9.98673	33.2994	13.7765	2.20557	41.4719	11.4123	11.9888	11.3654	17.7885	33.3317	9.57971	3.18666	2.1286	2.97071	5.75503
6.2	60.9657	40.8646	66.4293	10.9414	82.6197	62.5566	62.9819	76.3876	55.7041	35.733	55.4295	57.1674	30.5729	6.79814	35.0399	106.02	141.236	39.714	86.9323	17.1651	11.9758	26.2844	17.3513	-3.13171	52.8949	14.9734	10.6997	12.7671	14.1748	39.3106	6.01413	3.10102	4.03439	2.13003	5.97876
6.3	58.3061	41.6227	72.8527	11.7176	83.9142	64.4512	67.7311	80.3767	56.4496	39.0625	61.8432	59.3907	29.7443	8.69409	41.7401	99.7838	145.901	41.1314	93.7998	18.0452	12.4142	24.9222	10.0116	-1.81202	53.1763	13.308	11.9334	16.3856	16.4713	37.04	7.69209	4.33645	5.41769	-3.92004	3.82431
6.4	60.5834	47.8396	70.2997	10.9727	89.347	64.5286	69.4965	81.0805	59.0969	46.1277	60.1991	61.074	27.3704	8.66953	42.1204	108.98	149.8	44.2756	98.4849	19.7129	14.3047	26.4911	8.82009	0.853063	54.435	12.3361	14.5553	19.2363	22.6363	39.8132	7.70554	10.3539	-1.45627	-2.74849	6.77387
6.5	64.9353	47.1218	72.4612	12.4786	87.878	67.6919	73.5483	85.0105	55.8674	48.0134	62.5027	63.5923	32.9436	10.6838	41.0806	109.026	148.883	41.8776	101.717	16.161	12.9597	31.778	12.3423	2.06565	48.168	15.4217	17.9726	13.2118	14.8539	37.933	4.7216	1.42397	3.43219	0.425826	6.18912
6.6	59.6567	48.7068	73.8176	10.3831	87.1721	72.1021	77.2712	89.4341	62.5722	49.2536	64.2348	65.7548	30.4743	10.8581	49.8114	114.78	150.301	48.0797	90.0705	18.6185	13.9449	33.1031	11.6139	-1.07745	57.0071	18.1066	16.0456	15.4569	14.9296	37.9891	7.40447	8.47668	0.224919	-4.51253	5.49033
6.7	69.4904	49.5565	70.1628	13.4329	93.0165	71.3875	76.2597	95.6356	57.192	55.1095	63.7056	67.5203	31.6364	11.4863	45.044	120.827	145.692	52.2204	94.8336	20.9923	13.5076	29.196	14.4881	1.07441	60.3311	19.372	16.7551	13.8915	24.318	41.1011	11.6041	6.77358	1.08759	-2.38759	6.26061
6.8	69.0853	51.2497	74.3547	11.9294	92.7944	65.363	83.729	91.5879	64.0576	56.0086	63.9442	68.0032	31.3994	12.6973	45.8007	118.112	148.301	54.7441	95.8972	20.134	9.88366	27.6672	16.1181	1.30264	56.6738	19.6272	18.4386	17.2151	18.5496	42.7323	7.27917	0.542825	1.8053	0.690698	6.81292
6.9	68.671	52.8189	75.06	13.9283	95.3322	72.8627	84.0111	97.7166	67.5066	61.6522	63.7742	63.8445	33.1109	11.6422	47.098	117.63	142.725	54.8118	110.087	20.5551	17.821	29.0659	16.235	7.47437	55.6306	13.4922	19.3441	20.1047	16.1426	43.2053	6.96762	5.17068	5.859	-1.01521	2.81548
7	68.1179	53.1806	74.4116	15.1259	98.9832	73.3119	81.0043	101.563	59.9321	61.0592	63.5224	71.1646	27.9322	10.1175	43.8313	124.882	149.075	54.4684	109.662	20.7547	17.1719	30.3728	6.67756	-4.27485	61.7186	14.6055	17.3619	22.4637	24.824	44.8002	5.22087	8.59447	0.225716	2.62319	1.32553
7.1	68.5037	53.677	71.9447	16.0879	98.5662	75.051	83.6124	105.988	58.1962	61.744	62.5095	77.2297	32.9195	10.2525	44.6947	116.488	143.593	58.2807	103.083	20.137	10.5732	34.9402	12.7708	-0.83992	61.0354	15.4895	18.6489	27.2036	27.0531	43.2431	8.85939	2.60689	0.912005	8.80226	10.3261
7.2	73.1143	58.0655	75.5781	13.6633	99.897	76.2116	80.8168	105.932	71.3339	62.7944	62.8961	67.759	35.8303	12.5931	42.5213	117.788	148.958	53.3463	104.577	24.1789	12.9264	33.3851	11.3253	-1.68863	57.2997	14.757	18.2274	17.5176	19.232	43.2513	8.10316	5.34711	5.86216	-3.49636	8.65736
7.3	71.3649	57.8113	75.1675	15.6678	103.159	74.0126	84.663	107.577	83.3848	69.1186	68.0381	74.6611	38.8347	14.5047	42.2586	124.55	149.154	54.7189	108.339	20.293	18.7036	31.5687	8.60498	-3.46458	62.0269	14.59	20.1265	14.2674	24.8799	46.5149	9.87796	5.36302	1.99944	4.58456	3.24441
7.4	70.9574	58.1516	75.8827	13.2853	102.693	78.2192	84.6218	110.291	67.8955	65.5502	68.5697	72.2151	35.8517	12.9796	41.9735	116.94	153.42	57.2484	106.285	21.6266	18.7074	33.3463	16.6506	-2.86966	61.5634	13.4415	21.8265	13.9493	13.1735	44.2551	9.44213	-0.26878	2.11581	5.23795	6.74135
7.5	73.1002	59.9257	78.211	17.0597	102.016	76.1381	83.2946	114.436	65.8244	72.6834	67.3711	71.5679	35.637	15.259	42.6652	121.827	149.999	56.0106	109.197	19.9935	15.1153	34.4511	16.561	3.10054	55.097	14.3467	19.6857	17.9285	22.7853	46.944	12.724	4.18581	7.08147	9.62971	11.0491
7.6	69.116	61.53	78.5262	16.5075	107.094	75.3738	87.4371	111.014	74.3653	69.6435	69.0004	74.0278	39.7702	13.5012	47.9257	119.674	144.697	57.4151	120.222	27.7007	24.513	39.5319	17.2709	0.842131	69.2931	16.9345	17.7091	18.6351	21.0135	46.0558	10.936	7.11362	-1.67155	18.7184	8.66866
7.7	77.4311	61.5342	80.8155	17.0968	105.801	74.6409	89.3342	116.157	73.6903	75.7325	66.4616	77.3464	41.7343	14.5942	35.6353	124.894	144.719	63.3818	112.041	25.6225	15.3234	32.0272	14.6006	0.327098	62.3821	17.3466	22.5858	19.6271	16.5964	44.1713	7.72815	4.32587	-0.21777	6.7985	8.56007
7.8	74.4554	62.2477	76.9817	15.4535	102.236	73.9907	86.1848	111.968	74.9291	79.2793	69.2081	77.6811	35.4315	13.6443	36.7669	128.128	148.895	61.4416	111.18	25.0778	20.9812	36.0112	7.63279	4.41148	58.486	28.8383	14.5819	20.6348	20.5044	42.4815	8.93902	5.94767	1.64145	8.73188	5.67424
7.9	80.3154	61.1007	80.135	15.565	104.001	72.6584	92.2852	118.092	74.4635	78.7485	67.015	77.1063	41.6105	13.7491	43.6368	125.61	145.633	60.0194	105.121	27.3752	17.5286	26.5951	13.3072	0.495005	62.9227	16.3213	19.6164	20.0829	19.1037	44.327	6.72163	6.97772	-0.32872	13.6509	4.39512
8	76.0431	61.3593	78.6791	19.0607	107.492	76.5849	95.5728	115.094	84.4283	80.1384	66.5266	78.5683	42.3891	15.266	34.7913	125.132	149.408	58.5617	106.12	23.2643	23.7217	28.6084	18.0285	5.10625	61.3295	9.18226	19.0597	17.8467	24.5158	47.5674	12.1689	4.39032	-0.05522	15.5808	10.3834
8.1	74.6251	62.3676	79.8179	17.2632	110.146	76.6364	92.437	118.815	81.1032	80.7713	67.4676	83.0448	36.8329	16.5068	45.1451	124.237	149.122	59.5836	106.011	23.782	16.5593	30.0136	13.9253	-3.89844	56.9866	13.9072	20.961	20.0047	16.2977	46.8352	6.48616	3.47863	1.33981	15.5145	8.44088
8.2	76.0841	62.5685	79.8281	19.5925	105.996	72.4617	89.3863	116.809	78.6549	78.5519	68.748	76.2826	43.6605	12.5821	43.2792	129.281	148.525	56.4884	110.916	24.2434	19.4502	29.498	14.355	-0.48269	60.5499	11.3226	21.9039	16.3819	21.4301	46.5153	4.9754	2.95758	2.33837	9.82128	5.21858
8.3	78.7558	64.9857	79.2431	18.3789	109.799	77.9853	94.0293	120.217	76.2168	82.4871	68.5633	82.2986	43.9226	13.8514	46.0057	129.936	145.767	57.8587	112.747	25.4894	18.5802	25.6645	17.7117	-3.72016	63.5583	21.7496	22.1368	21.7411	27.5905	46.3369	5.50921	4.66576	4.98219	3.66806	6.05492
8.4	77.4804	64.8604	84.8405	18.6541	107.66	77.3797	93.2571	119.573	82.0808	83.6372	68.5186	74.6888	43.5555	15.3145	43.4061	129.371	150.567	61.3166	104.176	23.4788	24.7357	31.0046	15.8775	-0.16226	63.7229	20.1773	19.0563	21.3332	18.288	47.6298	6.10272	4.24841	-1.18135	9.16632	13.0058
8.5	77.436	65.7647	77.3384	18.4873	105.949	76.1273	94.4061	119.094	81.7231	82.8552	67.4089	81.9067	45.5421	15.5744	41.2742	131.403	149.547	62.0649	108.485	24.8228	10.0073	34.8981	22.0393	1.9197	63.3804	15.1609	20.9711	17.312	23.2583	48.0338	7.94108	6.3262	6.93161	5.45026	11.1892
8.6	81.5533	64.7437	79.4668	17.9615	108.455	78.9184	96.4565	121.081	85.6191	81.577	70.2397	81.8392	44.0057	16.6349	42.5889	123.688	149.626	60.9507	115.129	26.8484	21.4006	27.2519	22.4111	4.88424	64.926	14.9799	18.2591	17.8421	21.5584	46.699	5.48552	5.79639	1.99174	7.2536	10.7418
8.7	76.0782	68.3396	83.7265	21.0968	106.814	75.7221	95.9392	119.454	81.591	87.1316	69.484	82.9552	44.9605	15.9361	39.8235	125.233	143.5	58.5995	112.167	24.1435	19.6702	25.9635	27.9023	2.35605	70.796	17.411	19.5109	20.081	22.4696	43.748	7.62376	6.0225	2.10242	15.8379	6.09577
8.8	76.0737	67.9348	78.3674	18.4643	108.387	75.2938	94.1981	119.39	85.4646	86.6052	70.3337	84.447	45.4798	17.1189	54.3504	128.184	150.793	62.3008	106.237	27.168	16.4769	24.0428	26.8304	-0.20443	66.5913	9.85372	20.1348	25.7275	23.8629	43.5863	5.46669	7.53755	3.57738	9.13687	5.36437
8.9	81.1631	67.3456	77.2725	18.9912	107.843	75.7556	91.7196	127.637	79.644	86.2495	65.5161	84.5805	50.9473	15.2982	46.7692	129.205	146.661	60.2133	114.993	28.6261	18.2837	28.8344	17.1441	-0.14116	63.5151	19.7517	23.6292	18.9339	19.307	47.4956	6.61608	10.4369	4.80788	17.4785	15.1784
9	83.6581	67.0708	85.4419	19.0336	111.123	76.1153	94.3369	128.645	81.8124	89.7879	68.7458	81.6032	40.5122	16.1952	44.8846	125.713	150.774	60.2961	111.271	24.8339	22.2277	27.3172	17.8093	0.377204	61.9436	14.9717	24.6406	20.2304	25.7375	45.89	6.4879	4.0637	0.492586	7.77051	10.3776
9.1	77.7137	67.6485	82.0747	20.3196	106.86	78.2378	92.5068	124.329	89.6444	88.3898	69.9306	78.2096	45.0996	18.2243	45.9337	122.148	141.767	61.977	113.893	28.4297	21.2163	33.0081	21.3199	5.94515	68.8096	16.3468	16.1232	17.0638	20.4847	45.3519	8.7247	2.39588	5.83733	4.78379	6.77081
9.2	76.8206	68.2557	80.805	20.499	109.746	76.5998	93.9934	125.843	81.6048	89.5531	66.9986	83.3542	49.6545	17.8252	43.784	127.329	145.33	63.1569	117.418	26.1149	22.4076	32.2509	19.9744	3.06952	62.2561	18.2584	19.2128	16.8408	23.3012	46.0642	9.21953	2.23109	5.92084	5.47681	10.3756
9.3	79.5401	65.7211	82.217	21.8809	109.23	71.2926	98.8191	128.429	78.8381	87.0965	70.8013	80.5795	50.7781	16.2958	48.5203	123.167	148.201	60.8563	120.271	26.443	18.2956	34.1152	19.6783	5.96577	56.1004	17.6132	21.0401	16.9113	26.2253	45.446	4.83062	5.06102	5.84859	6.74622	8.67487
9.4	82.3293	64.6039	78.5381	22.6437	106.943	75.1573	93.2354	125.604	74.9506	88.0716	70.4992	82.9985	48.9578	16.7851	42.8734	124.394	145.447	61.5521	116.55	29.7248	20.0815	21.8898	15.5192	2.76575	60.4713	15.355	24.3556	21.1511	20.1878	46.1003	0.279637	3.9406	5.29639	10.5312	9.1217
9.5	74.8735	67.3677	80.3417	20.9087	107.842	74.1953	95.3685	127.452	82.5218	91.4032	70.5907	76.0038	46.3901	16.2638	41.1059	132.286	145.131	62.7538	119.646	30.0579	15.262	28.6636	16.4101	2.88126	64.8351	19.9001	22.249	16.706	28.2037	44.4777	7.83139	9.79723	5.58173	4.57794	13.1402
9.6	82.5123	63.7161	77.9704	20.3217	107.645	76.5307	95.41	122.048	83.3747	91.4174	66.2454	81.8988	43.4464	17.3617	42.5294	125.433	144.356	63.801	120.534	33.55	18.6731	24.5982	10.4031	3.01424	69.9265	15.9857	21.0661	20.7831	20.8901	45.0878	6.00288	7.28932	6.04546	6.64983	10.9092
9.7	76.5082	67.6856	79.9782	21.7458	108.793	75.5121	95.8484	125.675	81.7524	91.8732	69.0995	82.1242	49.6116	17.9825	39.103	127.082	141.789	58.4652	112.437	22.9415	23.5053	31.5735	17.5112	-1.37596	65.0423	15.7727	19.0707	17.5439	15.1303	46.3508	-2.91558	10.8495	5.11322	7.96425	9.81469
9.8	77.2518	65.5211	79.9946	21.5174	109.192	72.1116	98.5812	129.58	84.0437	93.6328	66.8358	85.2617	49.2482	17.2064	45.8681	124.93	142.946	59.2232	124.392	29.6428	16.128	30.4185	14.1011	0.907782	57.1418	15.9849	21.8521	18.2265	17.8439	44.1301	-8.05889	7.25003	6.3856	7.41845	8.32421
9.9	81.8294	62.8297	82.0212	21.3643	109.062	72.4212	98.7945	125.763	77.7646	94.0285	65.675	85.4709	43.8426	17.2458	29.6849	124.208	141.617	59.3889	121.717	30.3834	14.7465	34.0342	12.9255	5.71465	59.9275	24.8233	29.2205	18.493	23.0055	43.3362	-1.67662	6.91122	8.3524	3.76088	7.35341
10	81.7724	65.1231	80.97	21.3332	108.34	78.1526	98.4919	122.788	78.5435	93.1566	68.9591	82.9541	47.2018	18.3069	39.7849	126.235	144.951	58.7596	119.043	28.8713	17.3033	29.2361	15.5503	-3.81125	67.304	22.606	24.255	22.833	19.5115	45.0477	-10.187	4.09199	2.9403	2.33845	6.59547
10.1	81.744	61.8659	80.2415	22.9457	106.06	76.6036	95.3126	122.96	87.1595	91.6154	65.0767	84.4113	46.1507	18.1438	44.2953	125.481	139.299	59.7417	120.315	31.1696	18.1685	32.5188	20.7886	-0.00382	64.1881	25.3677	25.5499	14.7451	14.3924	45.4024	-6.82913	11.1964	4.3235	-6.904	11.7001
10.2	77.2239	62.909	75.4433	20.8015	109.092	75.6448	93.2924	121.836	86.6829	96.6521	70.5535	85.0235	47.8157	18.5056	45.2978	123.617	146.903	62.3019	118.349	25.9236	19.5494	30.3995	10.2693	3.04444	62.5805	21.5001	20.3223	21.5546	12.5909	48.1562	5.03716	6.48318	6.5012	-10.9553	4.39624
10.3	76.1159	61.9073	79.2448	21.1311	109.836	77.3641	96.4712	124.397	89.9282	94.1599	64.8563	89.7433	44.4839	17.1787	44.4386	132.226	139.041	58.0899	116.823	29.9917	18.6172	31.0841	12.3061	3.99361	61.657	22.6423	22.4391	18.1476	16.7344	46.7519	1.9426	10.9237	5.19048	-0.54035	7.0862
10.4	75.3698	62.8864	78.9064	21.7911	108.12	69.2861	98.9155	124.792	82.8344	91.4361	63.8697	83.0063	48.1476	18.407	36.6064	124.316	135.477	62.2575	115.302	28.5393	17.9327	32.1623	13.8806	2.91593	62.7141	21.3649	21.894	20.8744	24.0515	49.2936	7.68751	5.34975	6.11053	-0.82579	4.44897
10.5	78.2538	64.393	78.4652	21.5637	103.343	74.1511	95.142	126.834	84.1574	93.3066	67.1387	86.6124	54.3432	17.3107	36.2566	132.881	142.829	61.4241	109.882	25.7745	22.8723	29.8087	21.4923	-1.00887	59.2466	19.0715	18.8697	17.6063	30.7997	46.4882	3.74713	9.24842	7.41556	-4.75566	6.23187
10.6	80.3766	61.31	79.693	21.4687	105.854	75.3932	97.5194	122.198	78.8473	98.4177	67.1956	86.7417	49.9632	18.4667	39.354	125.851	146.17	62.0508	109.235	26.4438	19.5042	27.2752	10.135	2.1933	66.2999	19.9937	24.2285	18.4889	21.6869	39.7218	0.463679	4.81341	6.21197	-8.44441	8.07433
10.7	78.3043	62.147	76.2549	21.3993	105.831	72.63	97.3469	123.055	71.161	98.9049	67.5815	83.0364	51.2881	19.3565	41.0965	124.123	137.065	62.242	111.709	26.9852	27.9544	29.3536	15.1153	6.16642	61.6944	16.943	21.6566	18.1993	23.9055	43.2535	-0.768709	6.82085	7.15483	-0.96275	9.03936
10.8	82.7837	63.3421	76.8396	22.8075	104.736	69.5919	98.5536	125.951	82.8607	96.1197	70.2329	81.2425	48.6677	18.6884	43.9444	120.927	143.624	64.5262	115.449	28.7066	20.0201	27.5052	12.0888	0.293304	66.3096	18.1073	21.2637	22.8338	22.7555	42.838	-0.401123	5.68191	5.62819	5.78613	6.71197
10.9	80.9834	60.9938	77.3361	22.0532	109.605	74.3232	97.7191	124.961	79.2933	97.4428	68.2201	77.2633	54.7886	16.729	43.8249	124.283	144.589	61.6875	110.885	29.9879	18.5958	30.3945	15.9951	1.7976	69.4134	15.556	24.3274	21.8562	20.2514	39.3081	-1.29684	8.10642	4.6509	7.00319	7.74918
11	73.5759	61.7313	77.4599	22.6109	107.356	76.1352	98.501	121.929	77.2072	97.1334	68.3967	81.5664	58.3549	18.3464	29.1756	124.703	141.37	59.3654	117.013	28.8947	19.9079	27.9395	16.3011	5.09039	58.4131	15.7073	21.1214	21.7464	16.4888	42.8329	8.26118	6.87054	6.98807	7.13141	5.1396
11.1	75.0938	60.5573	78.979	22.3202	107.278	69.0591	98.3913	125.597	82.0934	101.085	64.4486	84.826	53.7633	18.0352	31.1243	118.424	141.769	64.6516	111.536	27.2192	25.5942	27.6555	13.8093	-0.79766	65.4436	14.6612	20.5738	18.0853	20.2523	37.4186	-5.19653	8.97455	5.01463	10.8997	2.49386
11.2	79.8533	61.0713	79.1956	22.978	106.702	68.1789	99.4995	124.181	79.8816	101.483	67.9405	80.2208	49.9702	17.4458	39.6973	119.533	140.338	62.7296	108.046	27.6353	22.8661	30.8655	15.2438	3.04495	64.1246	22.16	24.7811	17.6696	18.1481	38.9677	-2.22509	3.40297	4.0898	7.95453	7.38373
11.3	80.7046	59.0308	81.3508	23.5484	106.741	70.4038	98.1068	120.495	79.8841	100.733	66.4403	82.2431	46.8741	16.6009	38.2037	118.879	144.187	61.1182	121.86	26.7586	22.3907	25.0879	15.1421	2.05717	60.2538	21.3015	26.3514	20.1104	15.1838	37.0519	4.48327	4.06531	4.51618	5.63282	0.273436
11.4	73.132	59.8548	80.6392	22.2725	110.762	70.8487	96.8128	124.949	88.191	99.9292	67.4313	76.2628	42.7161	19.3848	35.4306	126.246	142.182	63.5025	116.036	27.8	23.5523	25.3091	13.2029	4.82679	54.9028	21.8452	28.7449	17.2158	15.9188	45.7705	-1.87696	6.80442	2.81328	6.63581	6.81954
11.5	78.7095	57.7662	82.6639	20.6498	106.44	71.0338	96.9334	120.112	75.9444	103.563	66.0864	83.7687	59.4455	20.0942	41.628	124.897	143.332	61.1202	117.45	29.4013	22.6532	26.982	17.6465	2.39075	63.7248	20.2298	21.0796	19.2501	13.3158	39.9558	5.99079	7.80374	6.69813	-2.50815	10.0657
11.6	77.3614	57.3167	84.4752	23.6364	105.574	71.045	95.0513	125.043	75.5701	103.441	67.6434	79.0113	52.3618	20.4158	33.1701	125.37	142.553	62.2765	113.893	29.2526	21.6014	28.3018	12.5582	6.52726	57.424	26.7245	20.5469	24.7446	17.9832	37.9372	7.30313	5.38429	5.08432	2.9374	12.8867
11.7	79.0172	57.4607	79.8619	23.295	105.692	70.6272	96.9118	124.807	78.0693	101.189	65.931	81.4199	49.5299	19.9031	36.1336	126.575	137.11	59.5114	115.7	25.0679	20.4433	29.1004	12.0224	4.62092	63.4928	20.9927	22.1281	25.6682	17.9428	40.8521	-3.44482	7.70446	4.28102	13.4461	4.53781
11.8	79.7631	61.9786	77.9414	23.8399	101.988	69.6249	96.972	125.372	86.9052	97.7536	66.9865	80.3973	50.4553	18.4024	37.4477	120.379	135.876	57.8713	128.058	31.8746	22.7955	26.0268	18.5848	6.84168	58.3364	12.4744	25.6903	24.8958	16.1601	44.7304	-4.15189	4.01782	6.3961	7.44677	6.98947
11.9	82.0697	59.1632	76.244	23.3758	102.061	72.8564	99.2267	122.291	79.9313	100.522	65.9641	72.7194	55.9602	18.4689	36.4045	128.517	134.826	56.2841	114.605	27.9212	19.6039	30.1639	17.4003	-0.50104	61.7795	11.4765	19.0443	12.0545	22.0248	39.1077	-1.68001	11.6248	5.00686	10.6313	8.13486
12	75.5713	57.2837	81.3788	22.3036	99.6462	72.0121	93.8822	122.432	89.9722	101.55	67.6669	79.2023	54.0511	19.3695	33.7398	125.344	137.155	60.2991	108.346	26.8444	21.0137	27.6508	14.208	3.38494	59.0158	19.8406	19.5059	25.2447	15.9154	39.3487	1.62855	8.89996	1.86056	6.54911	5.2986
12.1	79.4451	58.6437	77.7336	22.5962	104.419	69.1883	95.6978	119.607	73.4796	104.488	65.5785	79.2578	48.1708	19.1924	36.3089	116.167	138.351	58.5863	114.819	28.9062	22.0072	25.8808	14.3759	4.8824	60.4817	19.5886	21.5139	13.213	18.8855	37.147	4.52722	3.65822	4.15317	14.5585	5.76683
12.2	80.1807	57.5381	79.5943	23.2611	100.675	69.2728	95.4637	127.341	78.7646	103.335	65.4898	77.6189	51.317	19.4504	31.708	129.227	132.698	57.6503	102.555	25.9457	17.4844	32.5644	13.3208	1.7272	55.249	25.9015	23.4212	13.454	21.5153	38.4461	-0.597138	6.45408	7.16463	16.1776	11.5414
12.3	78.4762	59.9184	80.4553	25.5265	100.438	69.695	94.1473	120.449	92.2151	99.4855	67.4814	78.9741	49.7739	19.0549	34.6008	125.258	133.863	60.5022	101.708	28.7167	17.6632	36.2123	16.2659	4.21741	57.8581	17.8469	22.0002	11.2364	23.5482	41.4342	-4.35354	8.13345	3.26229	6.96261	11.672
12.4	82.3668	59.0511	76.7857	24.0636	103.75	68.6665	94.5611	119.161	89.8645	103.041	69.2661	84.744	55.1395	20.2549	35.4063	122.442	130.683	57.1666	108.151	25.6004	18.3586	27.2631	13.9187	6.3738	62.9251	19.3837	20.723	14.9612	20.1118	37.7079	-0.810723	1.72581	5.33108	10.4552	4.67908
12.5	79.1441	57.4111	75.152	22.2624	101.466	65.8707	94.3351	117.09	83.8143	102.473	64.999	85.6504	52.5369	19.7148	30.9768	120.227	136.972	55.512	107.194	25.6423	17.4885	27.4936	15.6294	1.8977	57.2118	19.0982	21.234	24.2421	27.6866	39.2666	-5.7563	7.75102	3.09636	7.62295	11.7248
12.6	84.9889	55.6098	78.9147	23.2901	101.357	69.9833	95.7037	118.665	94.1881	103.269	64.0292	76.0019	52.1617	20.414	41.5003	119.62	127.647	55.055	105.344	26.3797	19.3505	32.5614	8.61229	2.60507	54.9473	19.3233	22.2422	19.3698	15.3146	35.7252	-6.53777	0.234111	2.64714	0.428744	-4.32204
12.7	82.7614	58.3819	82.1522	21.4572	100.596	62.9604	94.5523	120.031	88.6324	102.003	64.668	75.9145	46.3779	19.755	33.4331	121.872	133.263	54.3245	110.863	25.2129	21.8597	20.2211	12.8439	5.86994	57.6173	19.173	21.6304	13.7736	21.9669	33.625	5.20309	3.17444	5.99024	14.6266	8.8191
12.8	88.6328	57.4036	85.626	23.9754	101.401	66.8166	95.663	117.464	92.9837	105.329	65.8547	80.0903	51.8723	20.1776	38.1011	113.427	138.358	52.5785	102.501	27.6525	25.1721	22.246	10.3692	5.20753	54.3405	16.11	18.2811	13.4953	19.2816	44.0474	-1.81363	8.91202	7.25137	5.02349	7.86307
12.9	80.6211	61.0602	76.4125	23.8526	99.0971	67.1564	96.9895	112.694	79.8102	107.171	66.4002	84.1615	45.0156	20.08	28.6477	117.372	132.519	53.2673	106.799	25.5385	19.8436	29.8975	7.64299	3.77337	53.5529	20.3182	23.213	14.7401	13.9755	36.4512	-3.38803	7.73751	5.59546	7.39865	9.34165
13	76.064	59.4623	78.1277	23.0812	99.1583	67.1959	95.0625	120.727	78.3435	102.482	67.5376	82.5441	53.0977	20.899	38.0064	119.563	139.048	52.1179	110.689	26.1098	24.6426	25.8877	12.3415	4.83743	54.9739	21.0767	21.7334	13.6505	19.8282	34.49	-0.188505	9.59773	8.66988	23.9348	9.83378
13.1	73.2977	57.5686	75.2925	22.235	94.6134	68.8203	98.0345	116.846	75.8343	103.553	64.7455	83.5881	48.0202	20.4632	36.3494	119.522	129.583	51.256	112.524	24.2662	22.8603	26.4422	6.45077	7.67488	53.2225	18.9142	22.539	15.6539	12.6013	36.5047	-9.22956	1.96641	3.72661	8.27543	6.82563
13.2	80.0443	58.9206	73.4148	23.3449	94.6018	69.3455	92.5314	117.938	75.8603	103.102	68.9261	80.7434	52.8544	21.318	43.5851	122.036	128.834	53.758	111.629	23.8172	25.0622	24.7823	13.274	3.28826	54.4087	19.3219	23.1306	14.8277	19.0127	37.8261	-3.61569	7.31997	4.42886	17.5666	5.89231
13.3	78.5557	57.7861	76.9033	22.3415	97.6685	66.7079	96.1592	115.502	78.0564	105.697	69.3682	76.779	56.6754	19.9427	43.8619	116.406	131.757	52.3587	109.275	28.4038	23.1653	26.9166	18.1045	0.511466	57.208	17.2149	21.1467	14.4436	12.2932	36.4708	-12.4276	5.4501	5.26782	13.8789	6.98472
13.4	78.146	58.7092	74.6411	19.6113	97.8581	68.8669	92.7772	116.165	73.0056	102.132	67.9127	78.8434	54.52	18.325	54.7034	118.492	128.423	53.701	103.794	27.7593	23.689	30.8615	12.3559	4.17335	58.6578	14.8929	19.3753	13.0722	15.9346	35.1043	-2.2518	1.2043	4.61523	15.9621	9.82546
13.5	78.7251	57.2765	76.6121	23.1547	96.0845	67.5544	95.3811	118.219	77.9592	104.659	67.444	76.5824	55.5333	19.1904	45.8182	116.344	136.192	54.4123	116.356	24.8167	23.1057	20.6039	7.92287	-0.17068	57.941	18.0757	17.6956	13.4896	16.2694	34.5159	3.26796	-1.78736	2.25235	9.93356	6.71198
13.6	81.6861	55.9016	75.2781	22.1578	96.1035	64.9509	91.7143	114.25	79.139	103.899	64.6036	78.0724	48.2356	19.7496	46.2616	112.879	132.561	51.4411	112.871	23.9373	24.2467	26.4642	6.16081	5.40326	54.498	17.7193	25.5846	14.6299	18.4853	37.8593	3.14584	0.772493	7.20663	17.0584	8.66169
13.7	80.4901	56.8287	74.1826	21.5215	94.5447	67.559	92.6767	118.535	73.8698	101.69	64.4347	77.6171	49.3002	18.4682	60.4797	113.555	132.176	52.6355	108.679	24.2223	19.6372	20.9788	12.6212	7.20882	53.7825	19.6892	19.0883	24.6068	17.1937	33.6622	3.84092	1.85675	5.14096	10.1983	9.4121
13.8	77.623	56.1468	71.8834	21.8978	96.9581	65.5292	94.9917	115.653	73.8544	102.512	66.1497	78.6577	55.8821	19.9014	55.057	113.848	137.292	51.8302	106.978	20.2145	23.0169	25.1495	12.9649	1.14621	55.6849	18.8309	11.5998	22.5985	13.6147	34.9403	3.69423	2.3456	5.21112	7.71288	5.95487
13.9	77.858	59.9497	71.4558	21.1287	97.6103	67.0832	88.7373	119.44	78.6906	103.947	66.1337	72.7885	56.6918	18.6397	47.7695	107.21	133.016	55.1499	107.626	22.1241	20.1632	26.621	14.5658	1.55265	51.6454	16.2747	16.662	18.8163	17.1717	33.7804	1.81882	0.982966	1.73041	8.69985	6.02427
14	76.3484	58.3012	74.2461	22.6667	97.3153	65.0794	91.7146	120.431	73.7667	104.372	66.615	80.7219	54.1883	19.9543	48.3454	110.546	132.382	53.6464	112.593	26.3474	24.8398	24.5724	7.73604	2.06632	54.7961	18.0312	19.7057	22.3941	18.5701	33.6366	3.55941	1.40266	2.66759	11.8523	9.99256
14.1	73.8294	59.2911	75.0503	22.462	96.0452	64.1892	92.203	114.922	75.225	101.4	65.6589	76.3839	55.4008	19.4712	46.7068	114.043	133.123	53.5734	103.767	26.9345	22.3369	23.5407	15.1737	9.76596	50.3891	18.7614	24.1332	20.4378	17.1973	32.8913	6.81928	4.84029	4.3202	14.9969	7.69284
14.2	75.4101	61.4239	71.9125	23.9661	95.1569	65.9695	95.3184	123.337	73.7	103.016	63.9884	80.4192	52.4586	21.224	48.2903	112.583	127.103	51.4696	107.496	22.9496	20.1931	19.1301	4.17473	3.57264	49.2503	17.2204	20.9643	13.7167	13.7297	34.8208	7.11167	2.25786	5.78175	10.4268	12.8437
14.3	79.3885	57.0444	75.5279	23.1221	96.8187	61.5942	93.8376	117.663	82.772	105.222	64.1402	72.9406	53.4489	19.06	42.705	115.873	128.668	49.7068	113.42	27.1575	22.251	25.6787	6.5197	1.01258	53.9439	23.868	18.7483	12.7682	15.613	34.9711	8.78307	3.44415	1.99735	15.9113	7.24157
14.4	76.7993	59.4574	72.5922	20.0691	92.4384	63.6309	91.5258	120.388	82.7788	105.265	62.6604	74.9559	52.8203	19.7668	52.1307	108.924	126.869	50.529	104.37	21.9795	21.1494	22.3146	1.70229	1.04755	55.4362	19.0763	22.1854	21.6203	18.7486	31.7151	8.40449	2.86401	5.74928	3.31011	5.30833
14.5	76.6692	58.3841	78.7767	21.7301	94.7675	61.4014	94.2289	117.311	77.9878	104.856	61.9042	77.3733	54.2936	18.959	52.3821	114.918	125.113	49.2714	104.407	26.5786	13.8776	24.3409	3.27478	3.71658	53.6904	18.8286	21.7138	15.6485	9.59426	31.1872	5.38736	4.19679	5.1749	2.43429	13.7893
14.6	78.6141	57.7979	76.4331	22.1024	93.8707	63.7772	93.4132	116.653	73.4111	101.614	63.0085	75.9608	57.8959	18.9384	45.7275	116.272	122.505	52.3512	112.366	24.2744	20.3362	25.1029	11.2599	4.11206	49.2699	13.0926	19.6359	11.1238	17.0301	31.9489	7.97376	2.9451	5.19224	0.443978	8.15904
14.7	80.0754	56.815	70.6913	22.6536	91.5704	62.8706	90.5854	122.972	86.5952	103.348	65.2997	72.9656	57.3979	18.3381	44.1541	110.785	126.828	50.0951	103.403	22.1117	23.8791	22.7423	10.5858	5.30053	54.7765	25.8164	23.5612	11.6252	11.0271	30.9181	3.6461	5.43172	6.27338	13.7402	6.92269
14.8	82.2398	58.9787	71.494	24.7671	92.1764	58.6805	93.0569	119.245	79.1018	105.345	66.8444	73.5909	56.5466	19.6487	38.2093	117.624	130.116	52.5309	95.88	22.3059	18.1764	24.5076	16.9359	6.58508	50.7417	18.3543	18.9105	21.8735	11.9913	31.3698	5.03111	9.14991	3.56758	9.06045	13.6573
14.9	79.3371	57.7528	73.5791	21.8567	90.7629	60.0079	88.4203	114.068	75.8254	102.397	64.1409	73.088	54.7207	20.4385	36.06	116.185	128.566	51.3268	102.781	22.9136	18.2739	25.0686	16.7399	0.614472	52.8179	18.2414	21.5782	23.1686	18.2493	30.8401	3.15369	8.41675	2.32222	-2.04454	7.86926
15	76.748	58.5368	72.9839	23.1888	92.9164	61.3754	90.5869	113.678	73.8396	103.852	63.7345	76.5912	60.3309	17.884	33.7179	106.076	129.192	49.3927	97.6578	20.6122	24.2808	18.3794	15.4144	3.57811	49.3416	22.5437	20.3383	19.836	12.3803	34.4787	3.91471	4.17178	5.27692	11.3646	9.10399
15.1	79.2492	60.3789	73.3992	23.2549	93.2492	62.6101	90.5732	113.612	72.3731	102.518	61.6488	73.8946	54.5935	20.2569	41.9948	112.299	124.688	52.9153	101.786	23.2012	13.4854	20.3509	17.8463	7.31273	50.532	17.0537	22.6542	12.5569	17.5484	32.2968	6.5465	1.71929	5.10413	13.2091	6.08891
15.2	80.1287	58.5867	72.7151	20.1682	89.583	60.1417	88.6938	122.051	78.1013	100.711	62.2076	76.8204	56.9693	20.1529	32.2608	114.622	127.633	51.9611	108.579	22.5876	13.7603	22.3409	19.5854	4.0552	50.8913	21.2765	17.1046	13.7093	12.9807	31.0252	5.76843	2.76659	2.2315	13.9338	5.85838
15.3	75.0753	59.276	70.4	20.3105	92.6748	63.7151	91.194	110.004	72.6957	106.218	65.4666	71.7252	56.1146	18.1899	36.9142	109.522	121.179	52.5116	103.113	20.8872	9.82871	19.1365	19.4148	7.20291	44.3999	13.6191	21.7152	11.6385	20.0691	29.5017	-1.1469	8.11966	2.12837	10.8134	7.41879
15.4	79.4492	58.9876	74.6094	21.4248	88.8623	63.7688	84.8377	115.439	76.5594	103.789	63.4353	71.9601	53.4652	17.8853	46.1758	112.292	119.922	46.4653	109.474	19.4012	13.956	19.9278	17.8955	2.33403	53.6792	13.6397	21.1524	11.5484	9.99024	31.6838	5.73727	6.4455	3.62581	17.1707	8.19145
15.5	74.2558	58.5474	71.666	19.6225	90.1013	59.6846	84.8727	114.215	72.9465	105.817	62.7023	76.7544	58.6561	19.9321	40.6845	111.979	118.764	48.5743	101.194	22.0294	13.0099	15.985	15.2994	3.17578	56.803	15.1794	22.9495	9.23337	9.00073	29.6602	8.03596	2.97649	3.64555	13.4606	11.7155
15.6	73.4088	57.0168	71.8851	17.8566	89.4788	58.8938	85.7279	113.417	75.0316	101.657	63.9506	70.139	55.696	18.7104	39.9743	115.624	114.309	52.4596	104.738	21.5449	17.427	23.2526	11.2699	4.60253	45.6221	13.4449	24.3435	11.0197	16.3178	26.2232	-1.58745	3.32058	2.58854	7.42229	12.7239
15.7	68.6194	57.9151	71.4667	20.1624	91.1382	59.0274	85.3833	112.264	69.8377	103.446	61.1229	79.7359	52.0047	17.6971	46.7864	107.954	123	52.3863	105.913	24.9158	17.0109	23.8647	14.1047	1.23265	50.4538	15.8645	22.5002	13.4111	10.3233	26.653	5.18288	2.43206	3.06579	12.1813	7.16522
15.8	73.0601	57.548	70.6052	19.1346	89.3318	58.8943	87.0512	116.113	67.7653	101.928	61.2396	75.5847	52.123	19.0299	38.2659	104.599	120.262	51.8067	103.651	22.7457	11.57	24.9979	16.1549	2.21864	45.1446	19.2058	20.8557	10.8313	15.4522	29.5129	5.36995	3.14701	-0.60114	10.9436	6.48972
15.9	79.1469	59.0465	72.2278	15.0625	87.8832	59.9799	86.2805	112.682	68.1424	103.11	62.8878	71.588	54.3847	19.2251	34.297	106.553	118.081	51.3783	110.309	21.3686	11.5843	24.0909	15.7376	8.47312	49.7663	14.1402	24.7643	11.0389	11.123	32.9539	3.05402	4.45601	1.06639	22.4756	10.4275
16	73.6019	59.829	71.5837	18.7125	85.7183	61.5791	83.9721	120.246	73.1054	104.027	60.4837	73.3406	57.3379	18.5503	28.0756	108.384	120.242	52.4736	111.769	17.7029	16.0746	25.1248	16.93	-4.60338	51.0217	15.1077	17.4993	11.5953	4.54247	26.9646	3.91748	4.28352	0.861718	13.0549	8.49272
16.1	78.0894	57.8465	69.9223	17.7916	87.8097	59.5052	85.029	117.028	68.9305	105.143	61.2259	69.1252	58.4385	19.3674	37.0123	101.049	118.337	47.1588	112.166	18.3363	7.9805	16.9206	9.86606	-2.21314	51.5248	18.531	17.423	11.4875	9.97641	28.1852	3.49896	5.69329	3.60282	11.5937	6.81833
16.2	77.2922	58.0402	72.8093	22.2866	86.9616	59.9176	82.7805	112.167	70.2527	105.385	59.6455	73.0446	57.1446	20.9273	37.7788	108.404	116.474	45.8972	107.268	18.8285	21.1656	16.5233	12.1676	1.54941	49.9799	11.3392	18.9526	9.75886	8.83875	26.9885	-3.53153	-2.63818	3.81802	9.9673	6.5218
16.3	75.3063	58.9671	72.3736	21.269	85.8784	61.482	86.7236	111.84	70.143	108.097	62.8171	76.5747	53.2034	19.4452	26.6746	105.543	115.31	50.6117	109.522	22.3303	14.9672	18.6489	6.60656	0.596243	45.3991	15.1107	21.9237	10.6619	4.49265	25.8472	-3.39692	2.56162	3.801	9.90582	8.69832
16.4	73.9409	59.8271	73.9443	20.216	86.5696	59.2558	81.4614	113.87	73.2675	102.251	61.3865	75.0311	53.1313	19.4684	38.7845	107.735	114.959	47.8388	110.811	18.98	13.314	22.6486	12.0058	-0.65526	44.5827	17.1003	19.8618	12.3873	8.60701	25.2405	-9.51673	1.189	3.82467	10.1203	9.01835
16.5	71.3493	59.3929	67.8235	22.0623	88.2582	59.4474	81.6246	108.723	70.8119	103.521	59.8972	70.2966	54.2613	20.1875	36.5352	114.87	116.982	49.0667	110.263	18.5295	19.4597	18.3108	3.35794	4.20082	49.9594	18.0919	18.4133	9.54305	9.47089	28.5439	5.81365	4.25842	6.20914	10.8239	12.8273
16.6	75.2016	59.1315	69.3791	22.5394	86.7943	58.4707	80.7115	114.33	73.3255	99.8346	60.7641	72.8857	48.9922	18.1502	37.5875	118.27	116.493	46.8152	112.634	21.4372	18.1051	20.3727	12.6459	4.07397	46.225	16.6728	24.2855	8.14839	11.3489	30.1433	2.76295	3.18496	5.6649	4.08758	8.53518
16.7	71.7887	59.1801	68.9773	21.7277	90.8819	57.751	85.8361	108.861	73.315	103.735	60.2954	73.3492	53.428	18.4888	41.4059	110.031	123.913	47.8506	107.906	21.3431	15.8833	18.5225	13.182	1.31916	45.1685	12.6917	24.1589	16.4779	12.8085	22.1888	-3.29324	5.40706	1.93012	8.84938	6.68274
16.8	75.3232	60.64	67.8723	20.9324	88.7463	56.2751	83.3763	113.993	74.4235	107.494	61.3945	70.729	57.1169	18.0753	43.5158	107.456	115.077	46.7878	105.267	20.1214	16.4229	17.6488	4.79335	6.64863	44.4945	12.8121	20.4775	17.5498	6.90757	23.5713	-5.334	4.10101	5.89617	3.84027	7.59015
16.9	76.8326	59.779	69.4815	21.7184	87.1975	60.7197	85.905	107.962	81.523	104.047	60.5157	70.9646	54.8873	20.072	37.2874	106.054	111.985	43.3157	106.315	21.0231	15.6227	15.3528	7.53769	2.96994	44.2515	14.9478	19.5719	11.4529	8.54802	23.7307	-19.4827	3.41309	3.18853	10.8839	7.85431
17	77.2275	59.9187	70.4231	19.3017	84.5675	55.9618	83.8416	110.977	65.8302	104.961	61.2244	64.8261	52.8195	20.1749	34.5588	105.053	115.54	47.0767	89.9939	21.6448	18.9861	15.024	9.91319	5.23293	41.7741	16.0152	21.0391	7.5591	15.998	29.9761	-8.156	1.99886	1.91054	2.30047	8.7828
17.1	75.6335	57.626	69.0325	19.3008	83.6744	57.7346	82.9926	106.904	70.6603	104.542	60.5469	74.7741	55.3687	19.2131	30.8877	109.622	121.334	45.7491	104.932	19.4712	20.2099	16.5094	5.17378	4.93775	43.7372	13.5667	14.9972	11.5674	5.22633	25.2281	0.563105	5.98926	3.22288	-0.11796	7.02157
17.2	76.4821	56.9147	65.3383	18.4209	84.3433	55.595	80.2079	108.146	64.2433	105.801	63.4467	69.1585	52.1712	19.8915	43.0054	108.755	114.092	42.5415	96.1552	21.4579	16.8486	19.6917	8.22253	4.49389	46.0833	15.1738	20.3075	10.9564	21.304	23.2371	-0.980697	4.58286	5.90605	0.712973	8.66232
17.3	74.0118	61.0579	71.5635	19.163	82.3871	57.0811	78.1143	105.124	65.3593	102.92	60.6016	70.0048	47.9241	19.5811	30.7004	109.808	119.451	46.5826	98.2433	22.2302	12.5553	16.72	13.9843	2.92213	43.3457	18.2173	19.8669	11.714	9.82904	32.6556	-3.13261	0.978838	3.04901	11.4924	5.76443
17.4	77.9442	56.5074	68.1452	17.5897	82.6337	56.9318	82.2638	106.709	57.75	106.911	61.295	71.3608	52.8078	19.307	35.0579	101.002	109.564	44.5034	99.3813	22.1154	14.6877	14.1905	12.3379	0.146896	42.2017	10.2983	23.4505	12.5362	13.8455	21.2207	-2.49869	0.554567	0.675913	8.06631	6.62682
17.5	74.5445	58.4778	68.0464	19.6931	79.8925	55.6209	79.35	111.781	63.2919	104.431	59.5838	70.5798	54.3831	19.9913	28.7814	101.52	115.967	44.8264	103.271	21.1008	12.7055	11.6577	5.10096	8.01825	43.5791	9.95495	10.9652	12.6452	9.97665	26.5772	3.34216	2.94663	2.59261	7.84175	8.53813
17.6	75.1366	57.3697	66.6259	21.1388	84.7819	56.3631	81.9123	107.611	60.5815	102.156	60.1133	66.7919	52.711	19.5115	35.2308	99.5712	113.441	45.9643	93.4879	22.3822	15.052	17.9296	7.3698	5.13027	44.4282	8.23961	15.1771	19.1907	10.1325	24.5745	-19.4939	2.89716	-2.5547	6.9716	7.16789
17.7	70.9596	59.6222	68.5886	19.2508	80.129	56.4671	79.5447	101.669	67.154	103.026	60.1938	67.0897	54.2302	20.944	37.4087	99.451	111.031	45.555	100.16	24.5881	12.411	12.1923	10.7411	4.24079	43.1732	9.8671	20.4052	19.5282	13.3282	26.1966	-16.9466	7.73165	4.07568	14.5389	10.0328
17.8	73.0597	58.4725	69.916	17.0898	83.9479	51.9309	79.2942	102.932	64.0651	105.134	59.0184	68.2678	52.2516	19.4208	39.0484	104.665	113.707	48.4419	94.8928	23.5288	19.0284	16.1672	16.1449	7.36461	49.5144	13.8691	21.1851	19.2917	7.92391	21.1835	-2.54635	5.20659	1.56813	6.1012	7.31976
17.9	76.714	56.6128	66.4808	19.406	80.4342	55.1973	82.3012	106.583	57.7175	105.19	59.3787	73.4798	50.6574	19.8896	43.5178	102.227	103.995	44.9884	104.913	19.7095	14.0715	18.415	8.22217	7.19357	43.4209	18.6121	15.8299	8.24427	6.76461	23.5186	-28.3125	1.60487	3.50755	8.71262	5.05501
18	73.0903	57.5762	66.1558	18.7711	80.5682	49.7502	78.3034	106.222	57.0381	106.777	57.8963	67.0009	55.1682	19.8039	38.589	102.441	110.023	43.8513	99.1803	22.9736	16.8919	16.6424	11.0101	8.95125	41.0006	13.2447	18.1514	5.84157	7.6285	22.4723	-16.3736	4.68415	2.00146	8.83621	3.99659
18.1	76.0511	59.6635	73.4557	19.6156	80.8298	54.4073	79.6563	106.18	59.5596	103.604	56.8686	69.7565	53.472	19.1471	24.6835	106.971	112.857	43.2978	92.8356	18.8149	10.1148	22.186	7.72052	0.904103	38.9402	13.8782	16.5538	11.4654	4.64161	24.8973	-7.5657	-0.28853	4.22544	8.96842	7.321
18.2	70.4041	57.7654	64.0187	18.5324	84.208	53.3697	80.7536	108.85	61.1474	104.792	61.0602	67.3798	49.5042	20.9678	34.9272	101.409	114.44	44.1571	99.0065	24.4562	18.2881	11.9395	10.8587	2.86749	42.03	13.9659	18.2541	10.275	10.2849	25.0546	-8.36098	3.03022	5.2984	8.62692	4.88007
18.3	76.5922	56.9086	69.8631	21.6945	83.4699	50.4278	82.3839	108.459	58.1609	97.4516	60.2972	70.5664	54.4653	20.9602	32.1227	99.3237	114.409	45.2814	94.4805	20.42	16.1325	20.5447	5.75326	5.63655	40.5862	14.2178	11.3294	10.8228	6.33621	24.3937	-6.44647	2.16026	6.29372	4.59455	10.3216
18.4	70.4174	58.8569	67.4332	17.9492	84.3543	54.1899	79.867	105.344	56.7088	104.483	58.7346	65.8823	51.6332	21.6027	34.9138	91.312	112.997	39.3798	97.328	22.5689	11.2205	18.9487	16.8079	6.39705	36.6648	10.6904	21.9652	7.91541	5.71688	20.2436	-3.82167	7.96937	4.62234	5.21617	9.27659
18.5	72.2776	56.1039	72.1976	20.1387	79.8784	56.4085	79.3018	107.622	57.3286	101.506	55.5614	66.6982	54.9866	19.9655	25.7025	97.3863	105.362	44.1656	100.649	19.4704	18.5516	15.4999	15.2472	-0.14162	43.4814	9.38651	20.8498	7.12487	15.2912	26.0582	-5.43525	5.76877	3.8023	11.7043	3.80099
18.6	67.142	57.4532	67.9302	19.0087	79.4018	55.4325	83.3479	104.504	61.3552	101.978	57.4502	69.9764	52.1803	19.6844	15.6651	97.1419	114.339	44.7543	90.8215	20.6839	12.311	15.0711	7.11365	-1.43388	45.0419	13.3044	16.8052	5.54039	8.68958	19.8884	2.25123	3.04781	3.64966	5.17338	7.93466
18.7	72.7562	56.6404	64.2944	17.3381	80.6426	50.4843	81.4736	112.625	58.2009	101.902	54.8145	67.0005	52.6608	19.1215	14.5226	98.2375	116.437	42.3336	98.1749	20.9168	15.7898	20.6463	9.34188	5.00376	41.7517	15.568	14.0239	6.22511	10.4666	23.1172	-11.1589	6.52941	4.41625	0.873849	4.69649
18.8	73.3962	58.077	65.4425	19.3238	76.934	52.8502	79.785	109.591	56.2991	103.961	56.9666	66.9041	47.4641	19.3505	11.8877	102.595	109.466	39.5233	93.8569	18.0836	13.2763	17.2098	4.87747	1.56416	46.7619	17.3798	16.4315	7.9801	2.28024	20.169	-9.07947	2.73432	-2.10517	3.68016	3.1037
18.9	67.409	55.3902	70.0463	18.9969	75.6628	53.6262	83.8637	105.268	58.8663	101.6	55.4987	65.4661	51.4324	18.3061	20.6431	103.692	106.489	42.6307	90.4862	25.2086	16.0194	13.5615	12.2155	3.79704	40.9897	10.5657	17.0011	8.24872	10.1696	24.7128	2.95751	-0.95069	1.12176	0.506914	4.51477
19	65.5322	57.6358	64.7618	20.3904	80.2048	50.2689	83.1447	107.654	59.4703	102.516	57.1211	62.392	54.5662	19.8983	16.7713	97.0727	103.637	40.8519	96.9728	19.847	17.3982	9.49105	10.6969	0.945699	38.0895	4.95764	16.7295	3.4572	3.32813	18.2056	-16.2114	5.63841	-0.45333	1.87412	7.07453
19.1	68.5589	56.8485	68.9955	18.5009	78.2696	50.3574	82.7036	105.089	59.4223	102.629	55.7342	65.8067	56.7759	21.9811	19.2097	96.0451	107.342	43.5343	94.5573	18.824	17.1011	16.174	5.38861	2.27563	41.3105	18.0282	20.0101	3.29768	5.52166	18.6305	-5.30084	5.85	-1.45744	4.14859	7.3827
19.2	67.0099	58.4174	63.9005	20.0987	76.7187	47.6922	81.7974	103.011	55.1581	102.171	56.9594	66.4986	53.9444	20.8354	21.0361	98.5565	106.562	39.9146	93.7928	21.0766	20.4368	19.1571	9.15671	1.72232	39.7879	10.1845	16.0884	4.06515	10.1669	21.9611	-20.8021	2.77158	1.21617	6.1022	4.47079
19.3	66.3577	55.8641	67.2285	19.0076	76.119	49.6724	78.9704	98.5129	57.7067	103.169	55.7692	62.1233	47.1918	19.876	22.5134	97.273	104.809	42.6859	92.5884	18.7302	13.9391	14.7514	9.68714	4.30031	40.1161	6.23875	21.8819	5.18763	17.3006	20.3629	-9.07239	3.72619	0.889146	6.7327	8.49227
19.4	69.8828	59.4209	63.4824	16.9435	76.8227	50.4333	82.086	101.192	58.6971	101.788	55.3853	56.9115	46.9481	19.5045	16.0557	95.7691	103.732	38.9422	98.9038	19.6623	15.5358	17.7651	12.8711	4.05453	42.9881	8.82328	18.4049	7.69856	7.70956	20.5911	-16.4207	-1.14547	3.70922	8.37332	6.66219
19.5	67.0887	56.414	64.095	19.952	76.7447	46.6786	81.2704	98.8438	63.3623	101.234	54.5216	57.1826	54.2333	17.3556	17.4556	99.6694	98.4664	41.516	93.848	17.1155	16.4955	14.0804	7.36148	-0.27194	36.4719	10.8022	15.1889	4.20976	9.27172	26.0137	-6.42205	4.32139	3.51734	7.08741	8.95171
19.6	69.6239	58.6897	61.6651	20.6576	76.8031	51.4882	76.8386	102.484	62.5518	103.226	57.7128	57.4407	47.2952	20.4476	23.9278	94.9005	100.854	40.9166	91.4773	22.5778	18.9877	16.2736	11.1719	7.60661	37.0171	6.73523	18.0845	6.5867	5.84923	18.6083	-1.63439	2.27812	5.62566	11.6994	7.85199
19.7	67.5216	55.3747	58.674	17.1634	77.2147	50.5792	82.9922	101.296	58.928	103.888	55.9927	65.1766	49.2771	21.0777	23.8768	91.6755	101.313	36.3493	90.4221	17.0677	20.7744	11.9837	9.531	3.66545	41.5852	15.4009	16.5435	2.03084	14.0275	21.5131	-6.03471	4.063	1.03877	9.21214	10.2701
19.8	72.4084	57.2946	59.1116	18.1059	73.624	48.2476	80.1702	101.773	55.8898	102.456	57.2471	64.1296	48.5157	18.0208	23.2499	92.2592	102.27	41.1193	91.4385	19.7962	16.2319	14.8747	4.28092	0.148706	39.042	12.7787	16.6351	7.1225	4.93141	16.5034	-1.12842	11.581	5.30419	5.54165	5.32106
19.9	68.398	55.5524	67.567	16.6897	73.898	49.537	76.9148	95.5118	53.3376	100.996	58.9763	60.9673	43.5259	22.5531	24.4946	92.3189	100.712	40.543	96.5232	17.7315	18.7549	10.6805	12.9264	4.94008	38.2666	15.2676	16.3055	7.21935	6.27412	21.8697	-7.70795	2.33458	0.213337	8.76568	4.27193
20	70.1505	58.4127	66.5007	18.0009	74.6367	49.2825	79.3295	102.858	52.6982	101.935	52.7851	61.1812	47.0716	18.3568	20.5258	91.0546	106.037	42.2708	98.761	16.9549	22.1991	16.5335	8.542	8.1946	43.1577	10.6885	21.2458	3.88084	8.41833	20.1013	-12.8763	7.50426	3.2813	-0.04825	3.76006
20.1	65.6236	58.0689	61.7226	16.765	73.2389	43.8641	78.1307	100.307	55.8476	100.946	55.345	64.535	51.4032	18.5358	19.014	90.5902	103.11	37.0842	88.3673	21.6156	18.0734	14.4558	11.6249	2.97248	40.5781	12.0016	14.7631	4.96775	6.39121	19.0568	-4.89722	6.0281	3.3962	13.7662	9.09837
20.2	59.835	57.5953	60.2673	17.1356	72.155	49.9474	83.4943	101.144	54.0303	100.154	55.7553	58.5372	53.4996	18.1197	18.9357	92.4918	110.49	40.9851	90.6374	17.4102	18.1441	11.0634	2.41592	-0.92202	36.6952	7.12301	13.9493	3.03832	9.44321	21.5773	-9.48722	3.62449	4.44488	7.98469	4.42655
20.3	67.766	55.2964	62.1892	17.4276	73.66	46.686	77.1795	99.774	55.0185	100.518	56.2956	61.4559	48.2922	17.809	16.325	93.8092	103.009	38.852	92.1786	17.7485	19.2132	8.62207	10.5936	0.123283	37.1057	11.7735	14.6127	2.92628	8.52451	19.5759	-6.35029	4.21797	2.26158	5.61605	7.17937
20.4	63.4014	56.5723	59.2588	16.7107	73.4024	47.6902	77.4098	104.246	54.6438	100.738	57.1396	62.1075	50.4346	18.508	21.3689	94.8471	99.3147	39.5157	92.8537	21.6416	12.3937	13.2508	10.099	9.5094	36.2538	12.8957	19.8623	4.67828	4.85969	21.7717	-11.9882	2.93206	4.77125	6.0425	7.09553
20.5	74.1896	56.0199	62.1524	19.0641	71.8141	47.8056	73.1775	97.1282	52.7972	100.021	57.6495	58.5906	51.8002	15.599	10.9465	95.2295	95.5712	38.838	95.1922	20.25	22.1784	16.7577	8.15535	5.89751	43.3768	7.98536	16.0359	2.92656	10.0232	27.1575	-9.31697	3.97606	0.591583	11.0866	9.25634
20.6	69.0929	56.8611	65.3406	16.5667	71.502	52.0856	74.5666	102.364	50.6303	100.027	55.1227	63.6426	49.0311	17.7661	17.9363	93.6822	97.6756	38.5152	105.224	17.9593	7.97018	10.64	9.09359	-0.17275	40.9592	12.4172	18.618	2.87368	4.56124	19.6245	-3.27763	6.88915	4.82778	6.41378	8.91366
20.7	67.9098	55.4169	60.2521	13.7247	71.0582	45.4903	78.8471	98.7508	51.1252	102.468	53.8272	58.0998	44.1902	19.497	16.7448	88.4283	89.2428	40.7643	94.0733	19.5187	16.8697	16.0297	5.49392	2.04439	35.4611	9.36883	19.128	2.38765	7.05188	19.138	-10.9657	3.02604	4.75501	12.3844	9.43782
20.8	65.9768	56.7442	62.9354	15.7675	72.6406	44.6503	78.6837	97.4921	49.5218	97.9698	53.6997	58.2989	46.2588	18.0264	16.7805	90.3158	97.2801	36.6794	92.3991	15.1826	22.6114	12.48	-0.80598	4.82936	44.4215	6.89809	21.6937	7.24913	3.45095	20.6147	-21.6716	5.16758	0.529013	8.53548	7.2987
20.9	67.7504	55.882	61.3694	17.4426	69.6823	41.3951	77.7949	95.7484	63.8418	102.038	55.7188	59.6707	49.5253	19.2939	16.5283	90.553	93.9664	37.0888	87.8904	16.7227	13.9876	12.1906	5.55775	5.01082	35.5461	8.94665	17.8841	4.7201	9.29485	15.7857	-20.8923	4.72928	4.71129	5.47176	7.17877
21	67.283	55.8787	59.548	16.0179	70.0837	46.6336	76.8954	93.9483	51.3141	103.249	52.7951	60.2591	50.9592	19.173	16.9278	89.1323	96.7146	38.4298	86.431	19.7218	11.4345	11.3354	3.77965	6.38336	36.3991	7.54017	20.6573	3.66376	7.66449	17.6951	-29.5015	3.41158	1.81431	10.9669	9.63916
21.1	66.3147	56.2768	61.7208	17.8538	66.935	45.7908	76.5537	94.723	54.0829	98.6028	56.9395	60.5051	50.3137	18.7078	14.9723	95.3268	99.8644	38.676	83.5005	17.231	12.3077	14.6572	10.968	5.17135	37.925	7.73747	14.5874	5.60269	2.58609	15.7922	-8.99621	5.78951	2.23681	4.84303	5.04213
21.2	71.2202	56.1927	58.7816	15.839	68.8504	43.1786	75.6033	99.899	53.555	100.191	53.3422	60.2051	43.8558	18.3779	13.8867	92.4707	89.3757	35.5865	90.2013	20.1761	17.2634	13.048	10.2663	3.34473	36.5588	8.26964	14.2732	3.98371	4.43101	16.0333	-18.1021	4.29466	2.76678	4.06577	2.80428
21.3	61.53	55.0496	59.1816	17.5254	69.3867	46.541	75.4658	98.3337	56.1486	100.16	54.356	55.6744	48.0909	17.4674	15.6134	96.8121	91.7089	40.4115	81.868	19.0309	15.4116	11.7853	7.72143	8.35643	36.4321	7.83128	13.8145	6.43902	3.95463	17.1094	-15.2989	1.16744	2.06423	12.4936	5.49787
21.4	64.1221	53.1609	59.8138	16.5294	70.3159	46.2542	72.7789	94.1335	52.6323	97.3215	53.6168	58.2585	45.2129	18.0513	19.5749	92.206	90.114	36.5685	88.1377	19.0431	3.28411	13.7603	12.498	-0.58804	34.1825	6.46407	14.8917	4.21168	1.04731	20.8441	-6.23303	0.924922	3.79917	9.09081	2.52364
21.5	68.364	54.823	59.9529	16.4684	68.539	46.1074	72.4315	102.527	49.5218	101.764	53.6036	55.8912	47.8712	19.062	20.9099	91.3681	96.9389	35.6646	89.2715	19.0575	9.64132	11.8169	6.2436	3.20538	38.6099	13.0599	12.9301	5.55082	10.2276	17.5741	-15.3699	7.32515	1.49817	6.20994	7.49593
21.6	66.4368	55.8527	64.3099	16.0921	71.1562	46.1025	71.5787	103.152	48.2175	102.532	54.3168	53.0016	45.0765	16.9473	25.3749	83.6082	98.2028	37.8737	87.536	18.4676	18.3765	12.6908	9.37522	3.44723	31.3607	8.82474	10.7261	3.58712	2.04018	18.1225	-14.272	0.896508	2.01191	12.1358	5.51803
21.7	60.4104	56.2463	57.2704	16.1731	68.6103	46.8079	73.0108	98.4203	51.0589	98.0841	51.0335	56.4601	47.2392	12.0724	19.8566	88.2316	93.5536	38.899	80.0545	17.8221	17.3275	16.8833	4.73225	-0.00084	33.9953	12.5979	17.8839	6.10156	4.51676	19.5848	-12.9705	1.72193	1.29718	9.15805	-0.27992
21.8	65.4062	54.1275	56.9792	17.0403	64.9386	44.8873	75.0914	95.1495	51.2895	100.291	53.6481	55.4616	48.0371	18.2587	17.9531	89.6894	88.9727	38.0896	81.3778	17.0706	14.8493	19.8784	4.86686	1.08504	36.2444	12.4449	18.1838	4.00315	-0.07124	19.4565	-17.6192	7.2895	-0.27133	17.8948	6.14348
21.9	69.7973	52.3508	58.1419	15.8116	64.8908	46.099	72.3298	94.4856	51.5713	99.413	55.0602	59.9115	47.7035	16.4409	18.0795	91.233	92.0264	37.338	83.9582	18.7306	13.8629	10.6833	3.89414	-0.24704	35.9494	11.6107	16.5446	4.11869	4.57014	19.9871	-15.5459	3.65166	-0.5038	13.8128	2.61977
22	70.7988	52.5979	61.1331	15.6719	62.544	45.9926	72.1716	95.5078	63.1418	101.245	55.6435	53.7711	45.4355	16.578	22.8045	86.7029	88.9679	37.7917	88.8601	16.1591	14.9492	9.95942	3.86313	6.20636	36.3714	2.91546	19.5277	5.21713	6.06401	20.0191	-11.9661	5.79345	3.94835	14.1147	4.28413
22.1	67.4739	52.9956	58.8756	17.5648	63.8651	46.9387	71.9611	91.619	50.7816	101.157	52.8074	59.8339	44.4134	16.9237	23.0335	90.811	85.1991	35.4031	85.1841	15.9535	9.59766	10.646	-0.39582	5.3669	39.5431	7.65136	20.6237	5.10492	4.12907	21.8175	-17.1463	5.73765	-0.32902	8.73208	3.41759
22.2	64.727	53.9996	55.6659	16.2662	67.9558	43.8468	70.63	88.6094	53.4237	98.4759	52.8217	56.6907	46.3783	15.0816	18.3148	86.4662	87.9116	40.1398	86.0404	15.8661	15.5122	12.5073	2.0545	1.79637	41.4476	8.52032	17.8915	5.82436	5.01586	17.4309	-11.7991	-0.60655	3.13725	10.1672	1.81126
22.3	68.6606	52.6661	55.7477	16.0873	67.3221	47.0862	68.9699	91.0097	51.6248	99.6698	51.8081	54.1204	49.4067	14.801	21.7441	92.2308	97.9932	36.0134	89.1011	13.4719	7.1316	8.98652	6.11976	1.47192	35.1837	14.7686	15.1724	5.17536	9.89273	14.704	-15.3224	4.18768	3.07754	10.4484	1.93735
22.4	66.8504	55.7458	55.5496	15.4935	66.1879	44.4742	71.7635	94.06	55.5793	94.8709	52.971	58.6414	50.8973	19.5807	17.5834	91.2284	90.1906	35.5831	88.8011	16.4217	14.0132	15.3551	1.55223	1.95798	36.9898	5.49469	18.1956	7.94544	13.0642	16.0022	-17.0866	0.07251	0.478731	4.88115	4.31885
22.5	68.0731	54.8863	61.7794	17.78	65.8322	43.2132	68.6511	98.2494	61.1425	97.3473	49.2218	59.2992	44.2509	16.1558	17.8624	89.4097	91.0035	37.3266	79.0967	13.6224	12.5422	11.9488	2.53675	3.54787	36.8461	9.68132	15.7415	8.56259	13.3761	17.2978	-9.00218	2.67974	3.34107	10.5073	2.82739
22.6	62.5732	54.5609	54.9455	15.1064	64.5517	44.0714	70.0062	93.9989	53.0405	94.4449	52.3749	59.9682	46.5049	19.3462	16.0555	85.2017	86.7969	36.4619	85.7551	16.9837	11.7999	8.90618	9.5216	-0.69869	32.5602	5.65591	17.8472	7.22112	15.3995	13.7921	-6.21568	6.3919	4.09969	11.2822	5.41704
22.7	59.1022	53.6137	60.2647	16.2054	63.7911	42.5	69.9025	93.2216	51.4797	99.5707	52.8524	54.1293	46.6287	17.3626	17.1152	90.3173	92.7823	37.9318	76.5633	17.5071	10.7427	14.036	4.12359	4.5369	33.9564	14.1741	16.775	13.116	-1.70804	14.0607	-9.02192	2.39097	1.88417	5.04973	4.6653
22.8	62.5354	52.4888	57.4638	17.5052	65.7482	41.0412	70.6129	91.5905	58.2677	92.2257	51.8059	55.7815	48.2779	17.0453	16.0047	93.7451	81.9912	35.6176	72.1305	19.0167	13.4984	14.046	3.45513	4.63259	34.1358	7.0805	16.5525	8.44092	6.15948	16.889	-4.12466	4.62509	2.48939	4.13597	5.64154
22.9	64.1949	50.256	57.2849	16.8798	64.9708	40.2844	72.2726	96.2651	49.3881	95.6682	53.8479	58.833	44.9495	15.2362	21.3067	87.8888	88.7439	31.5833	70.7737	18.5317	19.33	15.61	2.56156	7.77481	32.1028	11.5431	15.265	5.99066	3.50763	16.6461	-7.84288	1.58116	1.75884	4.43392	7.4492
23	61.9578	51.3923	53.191	14.6258	64.9343	39.2754	69.7199	90.5878	47.9641	95.8796	53.3278	52.1921	48.0975	15.6234	18.8663	86.8227	86.5619	35.9504	75.2383	14.5984	16.7268	4.98076	2.14433	3.20929	39.8719	8.84901	15.8619	7.87292	12.3302	14.4941	-10.8139	1.62052	4.18992	6.81012	4.56175
23.1	64.1536	51.5644	58.6833	14.9019	63.3813	41.1374	66.4459	90.4655	48.6595	97.4874	51.904	56.5215	44.0191	17.4423	12.2165	86.9746	86.8091	33.4241	66.8291	16.7169	14.2481	13.8062	3.19776	3.84175	32.4504	10.2511	14.0916	5.8549	10.4266	16.8687	-9.4643	5.22511	4.58896	1.13977	4.13444
23.2	60.4013	51.7647	56.473	14.736	61.8519	46.7521	65.5896	86.1074	44.9886	98.0609	49.5745	56.3863	45.2171	13.6915	18.4436	89.2124	84.6837	32.5129	73.3534	15.7717	19.1656	11.3207	0.54142	0.434253	32.0211	12.2378	14.6408	7.30522	7.79671	14.5879	-7.75547	7.21286	-0.1098	3.58739	0.164693
23.3	61.3666	50.6551	57.5496	17.0287	65.8998	43.878	70.365	89.9875	52.4329	96.8303	51.731	55.9764	41.4551	17.9266	16.272	87.2898	82.509	32.1251	79.7392	13.5807	21.6292	15.4369	1.38791	0.534881	35.9368	6.87779	13.02	6.97942	7.66397	14.8773	-12.4406	1.56536	0.578275	4.29425	3.90635
23.4	61.0261	51.1962	55.7526	14.5937	64.1978	45.967	68.2176	93.0844	48.7104	98.0207	54.506	50.4013	43.9286	17.5561	16.2085	87.4634	79.2503	32.0854	71.587	17.7235	14.0876	10.6889	6.49776	-0.46725	35.8323	9.58389	17.4835	8.66371	7.58395	13.58	-12.127	3.27893	1.53947	5.44967	-0.3403
23.5	60.3083	52.4724	57.8955	16.0541	62.8448	42.7492	63.8099	85.2413	50.7343	96.0155	52.7608	53.3155	44.8546	16.9731	23.2747	84.0357	81.5577	32.4939	74.9622	18.8096	18.638	1.85103	0.862236	0.286663	35.2798	5.17462	13.1824	4.67076	12.6175	15.1429	-3.53382	5.83784	2.77458	3.17847	-0.1507
23.6	62.4115	50.2043	54.7039	14.6454	63.3104	39.1042	67.1564	81.401	46.9301	94.6237	52.6917	59.642	43.1266	13.915	20.6481	87.4485	82.5201	33.4174	79.4257	11.8648	19.9747	8.09998	7.20951	3.49064	27.5323	9.35622	14.8113	7.74713	14.415	18.1467	0.508773	2.28842	2.97953	7.3985	3.77926
23.7	62.2742	53.6613	55.7567	14.1407	63.291	45.2794	66.1007	79.575	40.8423	96.0892	51.8044	52.7958	48.1234	16.9437	19.9908	87.2948	81.1149	30.9761	71.1586	16.3408	12.297	6.96969	7.86657	1.00403	36.1702	3.78087	7.57036	4.11828	8.43791	17.1084	-8.71883	6.2774	3.9892	4.37633	4.15955
23.8	69.4263	49.4861	52.4795	14.7945	59.4221	43.6475	66.2009	89.0765	48.6297	99.7848	49.0256	55.4962	45.9268	17.9409	19.7922	86.6134	81.9922	28.1572	75.5961	13.2624	15.1497	11.9609	4.07728	0.928176	29.4407	2.68849	15.8393	6.72546	7.5291	14.7199	-3.57111	5.46012	5.45087	7.50212	3.57727
23.9	63.8763	49.2209	53.737	11.9221	61.5851	42.2962	67.7348	86.4709	42.1395	96.8553	52.467	57.7444	45.951	15.3633	18.334	88.8296	91.6347	32.5327	73.2698	18.6538	11.2845	6.77934	6.07601	2.13271	30.8616	10.5237	14.4256	7.34374	10.739	17.6059	-1.98226	5.11106	3.91349	2.94718	5.36308
24	64.4255	52.4408	56.1833	13.8262	63.3439	43.9076	66.6878	86.9399	33.5932	97.7777	52.0273	50.1103	52.074	13.6881	19.9305	81.9265	77.3553	32.4792	81.4072	16.1381	17.7756	5.75471	0.922312	1.06555	32.163	8.5511	13.3702	0.150987	4.42272	13.4362	-21.5592	2.6499	4.04904	0.964075	4.51245
24.1	63.4769	50.4692	55.2459	12.9171	60.5505	46.4896	66.9834	86.897	42.6722	97.2887	49.3289	51.1449	44.7014	15.258	18.7582	88.3317	78.0735	29.3563	88.1322	16.8582	12.5401	12.102	0.245962	0.729687	29.5579	11.2808	9.93992	2.98206	9.08168	18.0586	-4.77525	5.10807	5.30437	-3.35451	2.96182
24.2	62.5487	53.1336	53.79	13.6493	59.259	38.3869	67.258	88.5507	43.5627	94.2881	52.5751	54.4225	45.1826	14.2999	19.8887	84.1296	83.2616	28.8034	72.9915	14.7943	8.73489	16.8759	8.64743	0.192607	36.1777	7.86467	10.5825	7.66459	8.11458	17.4661	-5.0161	3.80247	2.49995	-2.88763	3.75911
24.3	58.6977	49.5404	57.5596	14.0368	57.4871	41.7034	67.1118	88.11	46.1009	93.8509	49.6369	51.8606	41.5382	17.4913	21.8104	86.3752	79.418	30.1184	83.5675	18.6845	11.0748	15.3229	0.439432	-1.92025	29.0371	13.073	15.6821	7.43447	6.3018	14.6861	-1.21786	-0.10428	5.20765	-2.24754	3.29743
24.4	65.6499	50.2704	53.3183	13.1462	59.0339	45.8489	68.4359	82.9061	40.8262	96.2611	50.2915	55.0186	44.1147	17.8055	11.249	90.8292	77.5876	34.5942	79.1235	12.2668	10.1092	3.02247	5.95547	1.77949	28.5214	7.81415	11.2822	6.37918	7.17205	11.6778	-5.23194	1.24982	5.62251	-0.13852	-1.67709
24.5	58.8869	51.6982	53.321	13.8446	61.9343	44.731	66.9219	85.2423	40.0792	95.6117	50.5554	49.0029	44.007	15.9166	21.3251	78.8865	80.9863	29.5799	73.997	14.7721	19.0837	12.0395	4.78178	-1.56503	28.4952	12.6701	10.3604	5.63516	12.8255	15.085	-0.519647	2.66512	3.11779	2.85084	3.00778
24.6	60.1748	52.3137	52.0156	13.7403	59.8279	43.9658	68.0685	83.9006	43.608	95.4583	47.6538	52.8663	45.9578	16.2099	14.6738	87.334	78.5913	29.8453	72.2109	12.0592	13.6798	10.7032	-2.01579	-2.88639	32.3639	11.1444	14.7495	5.79839	8.00237	12.9004	-13.0515	2.53142	3.73636	5.08201	-2.13082
24.7	59.7902	47.9953	55.0551	14.3311	56.8287	41.6377	68.7101	83.5	47.8503	97.5889	48.7526	51.791	37.8895	16.4568	18.7711	77.2835	76.3403	32.6359	76.1508	13.3612	10.6133	6.18662	2.63583	1.42479	26.0645	6.17471	13.7321	6.5329	7.60483	17.7195	-3.90651	0.859233	0.020739	-1.18966	-1.49388
24.8	59.6026	49.0319	51.0727	11.7899	59.1796	37.7433	66.536	83.7859	39.0568	97.6286	47.0581	51.9176	41.9357	16.7538	15.8763	82.9318	80.5954	29.3978	64.1274	12.9304	18.5032	11.294	6.24261	-2.55574	30.2067	5.74552	13.2684	5.38295	7.32041	14.1221	-3.39443	-0.5118	2.63694	-1.05757	4.15004
24.9	57.8971	50.813	54.1109	13.1407	58.7934	37.0422	67.1825	88.2454	41.5775	93.1768	47.2855	54.8758	46.9182	15.0956	18.4126	76.1699	75.3817	30.0748	70.9443	16.914	21.1949	18.5924	-1.54754	1.01546	31.1386	5.80905	7.50269	0.82703	8.9248	13.6655	-3.86819	0.758349	1.61503	3.97955	1.30213
25	59.0112	49.7191	55.6713	14.6578	58.2315	40.0981	66.0443	81.1186	37.9739	95.9344	49.6232	50.8939	41.9157	14.4524	19.1928	80.1178	76.5146	32.3255	77.7032	12.4989	22.8109	12.6484	6.01825	1.28503	32.5212	8.47861	10.7209	7.19738	10.9922	14.7876	-2.46507	-2.69991	-3.27965	6.21128	0.96003
25.1	61.1782	49.8207	52.8017	13.0119	58.3341	39.0871	60.7757	81.648	41.3672	95.4531	48.4301	51.3236	43.7564	16.3904	16.8174	80.4885	78.7855	29.2799	74.2908	12.7519	19.2481	13.4694	1.16305	4.53868	27.2576	10.0265	12.8274	5.83947	12.7361	12.5101	-0.297862	0.072789	3.81241	9.35454	4.50746
25.2	60.3451	48.9668	52.436	14.6992	56.0813	40.5449	64.7262	87.1398	39.5661	95.2045	47.4151	47.6537	42.8023	16.6905	17.7722	74.3911	75.5366	29.8712	76.0346	12.1533	17.18	6.83823	-3.03688	1.78377	35.3133	0.794965	15.8363	6.4882	13.1057	14.1014	-1.49818	0.919209	1.8181	12.9698	-1.90856
25.3	60.4805	52.8192	53.3159	14.1435	57.8592	37.9655	61.9016	82.5701	45.8116	95.1997	47.2343	47.8428	44.0748	15.1072	19.3158	70.7205	70.3197	31.6257	75.3107	11.3601	25.3831	-0.64848	9.37071	4.07938	25.9803	5.46959	10.7608	4.40294	5.65415	13.324	0.333727	1.32612	3.43042	10.4111	-0.12647
25.4	58.0136	49.0164	48.7953	13.8129	57.4087	40.8632	61.6845	75.9786	39.4287	95.0522	46.6963	50.7633	39.4647	15.8959	18.7112	77.1979	71.0335	32.6085	81.387	11.6769	16.944	13.6442	4.79139	7.01931	25.0798	-1.49659	14.2426	6.79478	6.82293	10.9392	-1.06077	0.006923	5.30151	6.77276	2.03003
25.5	57.2073	49.4164	52.6331	12.9592	57.2681	38.3991	59.7064	80.1937	42.9973	94.3282	46.8565	49.8268	41.9093	15.7648	19.7056	75.7304	72.7595	27.6711	76.3304	11.7076	5.2281	8.87028	3.89567	-4.05159	31.7423	11.0476	9.26226	5.83771	2.68625	8.0475	-2.26042	-1.14595	2.56148	5.70217	3.01323
25.6	60.9216	46.6938	46.9421	13.9078	55.5616	40.3707	56.6199	76.5566	38.2206	91.9983	47.3842	51.939	42.5791	14.57	19	78.2092	76.7979	28.7429	73.9803	12.0221	14.7962	10.4568	4.51362	1.61893	24.9436	7.83568	11.246	5.08454	2.13533	11.1532	-6.549	-1.01479	5.60945	8.77107	3.04224
25.7	60.9218	48.3736	46.7509	12.2596	59.1629	38.2931	62.9019	79.7194	36.5232	93.6028	48.0782	46.2866	42.914	15.2553	17.1347	78.0871	72.1558	27.5803	70.152	14.2884	10.397	14.1474	8.74529	1.23501	30.6278	6.70947	18.4754	8.04017	10.4206	8.84554	-2.77232	-5.47648	4.82026	5.29902	-0.78121
25.8	56.7881	48.2516	53.7037	13.1169	53.5471	39.8022	58.2688	83.1074	40.0055	95.3783	47.9131	47.6099	39.3089	16.846	15.662	72.1764	70.3062	29.3666	75.3082	9.43049	15.3522	12.5548	4.29752	-2.38284	29.1528	12.1851	8.8876	7.2012	-0.88297	9.47655	-4.74577	-5.07933	3.70861	3.61314	0.207278
25.9	58.745	44.6435	49.6699	13.1221	60.7289	37.344	60.7496	77.1201	45.2226	91.1805	48.2934	52.2584	41.2741	15.6079	17.6717	75.4164	74.7082	23.5132	71.2971	11.0449	11.4241	6.40731	4.33119	1.48144	30.3811	5.3621	13.7139	5.21067	5.71064	8.6478	-2.59432	-1.54893	-0.07048	11.9727	-3.31733
26	54.6032	49.0434	53.1489	13.1776	59.2414	36.9159	59.242	78.3112	41.0101	88.4922	46.5506	49.0637	48.8314	15.7428	20.4999	81.0049	74.7548	26.877	81.8435	10.9621	15.6899	4.67651	6.28487	-1.36102	27.5854	3.7862	11.3081	5.86469	15.3455	10.9067	-6.71526	-1.68226	3.00248	6.6598	1.5236
26.1	58.4269	47.2394	51.4266	13.0962	60.1168	37.0822	60.2637	76.6428	41.4903	89.3783	49.2338	49.2586	35.7148	15.9357	24.8053	77.053	67.3867	29.3776	73.5383	12.6492	17.3829	11.1594	3.54003	-0.92718	31.1648	8.93907	11.9505	8.16027	9.88461	14.1544	-4.85855	1.92016	1.43068	10.2945	2.90442
26.2	52.8299	48.0239	49.6981	14.0663	58.4519	42.4988	63.1724	78.8103	47.7607	90.3606	46.6736	45.8789	44.1295	13.8502	24.081	74.861	72.8493	27.1341	67.8642	10.9857	18.281	2.97051	3.80706	0.56385	30.8619	7.07586	10.0166	8.21367	8.20635	12.24	0.133583	-0.31724	3.76918	7.28316	1.67471
26.3	54.7499	47.6566	48.6765	13.8852	55.7193	38.4719	58.0186	75.5802	39.8444	89.7291	43.1922	42.5297	41.4486	13.339	13.0145	73.5704	66.8271	26.5722	80.157	12.1443	15.8973	0.632992	3.22614	1.31175	32.228	11.8367	12.2149	5.56761	13.4057	7.30786	-1.22065	1.24734	4.26612	3.47439	-2.4832
26.4	55.6097	47.9059	47.388	13.1669	52.4461	37.5411	58.6698	76.4615	32.4475	91.3407	47.5823	41.4879	44.9263	15.0228	22.2735	82.7351	68.3084	26.2029	69.1577	12.138	13.2715	8.91501	7.65808	0.786105	33.2248	-1.6427	11.5724	7.75423	9.0864	8.81361	-6.57391	-0.66524	3.86758	7.41742	-0.62755
26.5	53.6825	47.6919	50.3365	13.5253	53.988	40.3365	58.7613	78.5045	36.6968	92.2918	44.1867	39.9652	42.2658	15.1619	17.9741	81.4878	66.7333	30.8387	80.4726	8.75068	23.6523	14.7281	7.55791	0.458064	26.493	6.28591	12.2524	3.49536	12.5081	6.05746	-0.826954	-4.78604	3.21109	14.7748	0.52443
26.6	54.1066	44.6632	47.8457	13.6773	53.5376	36.4929	55.1911	79.273	36.2866	91.9015	46.6125	46.4417	39.1153	15.0705	16.1919	80.2333	68.3559	24.6975	75.2842	11.3414	17.6715	10.884	4.51642	-0.23471	25.2073	3.00046	11.993	5.59952	9.87652	11.4788	-6.74703	5.3519	-0.55821	4.9818	0.734114
26.7	55.688	46.388	48.1823	13.0716	54.0364	40.1387	59.8179	76.5506	31.9994	91.6031	42.4853	45.0227	40.0835	13.7804	17.7393	77.4674	65.7925	26.7604	74.8154	13.156	15.8009	6.75498	3.33834	2.7779	25.0499	4.82319	10.4803	5.0702	5.48718	10.5204	-4.96042	-3.96975	4.37605	3.831	3.40284
26.8	53.533	46.7209	47.4759	12.6429	55.3543	38.05	57.5187	79.443	31.4982	90.8476	46.2361	47.2714	40.0623	13.7645	20.8497	72.543	73.0603	23.742	68.8736	10.6029	10.388	9.41123	4.69665	1.51673	25.6013	7.4408	10.7982	5.96702	4.30707	7.61498	-2.04009	1.49468	6.39118	-0.8933	5.44376
26.9	53.0799	46.7672	52.6389	11.959	54.9744	38.1644	56.9551	78.9939	32.865	91.6803	45.722	46.6643	38.8736	14.9005	16.1613	79.1051	62.8788	26.5773	71.936	13.1318	5.49918	3.51198	4.99583	5.92769	26.3662	1.0807	11.6496	6.64374	5.38981	6.25271	-0.790686	-0.64565	1.58901	3.75654	8.3185
27	50.4607	44.6061	52.5489	13.1096	54.4118	35.7866	55.1881	76.8705	26.7487	91.8216	45.9895	52.983	38.1921	14.6447	16.6679	79.353	64.2432	24.5851	67.2935	7.50134	8.10342	1.66252	9.77718	5.2934	31.4758	1.52847	7.42702	6.66989	6.05033	7.84503	-6.46625	3.40236	5.49736	5.164	3.75458
27.1	52.4211	45.8543	52.2335	11.8522	52.5189	38.4245	55.5489	72.4275	32.2964	91.7508	45.055	41.2314	39.5092	13.7732	21.7014	79.5503	66.5114	26.5957	74.6113	10.8411	17.7072	11.4478	10.9609	3.39536	22.7954	16.8416	7.02749	2.98829	1.52233	4.69022	0.946386	-1.53866	1.54385	7.06563	7.0494
27.2	52.237	45.8961	50.5096	12.274	51.1263	34.7182	59.1177	78.8225	33.3566	93.1981	47.4287	48.2656	41.7453	13.6063	17.2766	73.3231	64.4408	27.6454	66.3645	12.0983	11.8969	8.86995	10.1182	7.06501	29.6172	1.82193	7.82263	7.05748	9.23595	9.63279	1.31466	-6.2114	6.13072	5.80482	-0.27818
27.3	49.8289	47.1759	49.7979	12.3861	54.3784	38.6272	58.0065	77.824	31.5359	90.128	45.4931	39.9672	45.3008	14.0664	17.325	68.5937	65.9034	27.9135	73.0762	11.3386	18.3293	5.20658	7.9333	3.39991	27.4024	2.65652	8.47396	5.03758	8.32483	9.4588	-0.0697195	-5.74988	6.05802	0.571272	2.99789
27.4	44.4584	42.4695	52.0339	11.1187	52.069	36.5758	52.9842	78.8201	27.8742	87.9646	47.5419	44.9219	39.6123	13.7553	15.8595	74.6972	66.6057	26.116	71.4073	10.215	15.2935	8.13073	11.411	3.64642	25.8164	6.98686	13.8981	6.46866	7.9591	6.90846	-0.201786	-4.89764	1.91845	3.64789	4.44815
27.5	49.3921	44.3943	47.4725	10.9521	52.5083	40.413	55.2382	77.415	30.0892	88.0769	46.4641	43.8114	43.6539	13.5027	17.4351	72.4241	65.3629	17.3177	66.7754	13.9697	16.5733	7.97589	6.6245	-0.48898	25.2397	7.53512	10.9594	4.89499	12.1	6.58404	0.817318	2.93195	2.50235	6.6149	6.96439
27.6	53.479	44.9254	48.7131	10.0621	50.0446	37.0282	55.028	73.5179	36.1769	89.6349	44.6632	40.9234	40.0258	12.4133	10.1862	70.5174	63.3879	21.6707	66.77	9.84692	12.9157	6.54823	2.97387	1.61479	24.4339	7.9097	8.75887	2.60214	9.24501	8.97752	-3.7926	-4.00252	2.89371	7.03992	2.57596
27.7	51.7479	45.0744	47.9633	11.8781	50.0734	36.3183	53.348	80.4061	33.761	88.7084	43.5254	45.8336	42.2058	12.0935	16.8622	68.2166	63.4424	23.8385	61.7069	11.481	14.7466	5.63444	7.66592	4.04442	21.9566	11.1728	7.02684	4.21216	13.8349	6.51604	-6.32931	-1.30063	5.2954	3.31821	2.75424
27.8	54.7005	44.0943	50.0503	12.2449	56.0684	32.6352	54.9392	79.3697	35.1224	90.0207	43.8169	40.6613	41.8704	12.2256	20.3548	72.219	59.6351	21.6778	71.8169	10.9527	5.96346	5.02342	7.25522	4.14668	25.0058	6.89274	11.3027	5.38662	10.017	5.34107	-3.95356	-1.83513	1.32935	8.33181	3.3086
27.9	53.8681	44.5355	47.0689	9.77421	50.7374	36.1262	55.8752	75.0539	33.2932	88.8016	43.9558	43.7331	39.2634	10.4887	15.6207	70.4088	57.5551	24.5047	62.0718	17.605	14.2667	12.0443	11.3443	5.07528	31.2079	11.0103	5.89184	5.90945	2.73558	7.00784	-2.52672	-4.36595	4.21806	7.37861	5.46508
28	47.2642	44.8418	48.4676	11.5145	51.0733	36.4948	54.086	74.1964	28.1316	91.1397	46.9441	42.0688	42.4759	13.9644	12.021	72.9708	66.7142	22.8938	64.6937	12.479	14.0856	4.72568	14.0843	3.66179	32.3947	9.28075	9.11829	3.28894	9.96898	12.4154	-0.216061	-3.74636	4.66602	17.334	5.76935
28.1	57.3231	44.463	48.4691	10.1305	49.6414	34.9497	52.6195	74.6653	32.7473	85.7167	45.5112	35.5366	37.5296	13.0636	17.506	69.2654	65.1128	22.4613	69.8314	11.5828	8.52159	11.1975	13.3327	0.689333	23.049	7.7539	9.78493	3.75845	7.79565	6.24168	-1.63365	-2.71602	2.18353	5.56942	1.5169
28.2	55.0163	43.4271	47.3189	10.6486	50.0073	33.7859	53.7185	74.863	32.4863	88.1873	38.8132	36.8977	38.6307	12.2075	12.4336	68.3837	71.8072	23.1672	56.7352	8.82224	10.6639	5.78898	9.62585	5.32541	25.5263	12.36	11.6523	2.60856	7.51629	6.12351	-10.1688	-2.72664	6.49644	8.47117	3.2923
28.3	53.5419	43.0922	48.3412	10.1769	49.4975	34.6176	51.816	75.1557	29.1418	87.8176	43.4579	41.3861	39.8311	13.4446	15.2719	68.1855	63.4887	23.28	56.0122	8.25521	7.43491	13.031	10.7777	1.84565	25.376	5.5734	10.5425	5.90442	15.3303	7.34753	-1.99446	-5.4742	4.41551	4.2902	5.46019
28.4	49.0093	43.2317	47.5932	10.4915	48.5407	33.958	54.3871	72.2022	34.5025	92.2954	43.2925	39.3554	38.5036	12.4807	16.634	65.794	72.5113	25.6402	66.7544	13.659	9.51727	16.1633	11.0538	2.08057	28.5274	7.03478	12.5161	1.95122	7.15537	12.446	-5.01588	-1.81931	-2.73361	11.985	3.29322
28.5	52.8454	42.9221	49.1276	10.2534	48.5884	35.1858	53.3508	71.0084	37.39	86.5048	43.9577	42.8124	33.9528	11.0656	11.6445	63.0865	67.3787	25.6453	65.5968	11.989	6.20325	8.86723	3.50122	-0.11903	25.6988	10.7575	9.63595	3.48828	16.7344	6.03863	-5.76213	3.34117	-0.61479	6.83421	5.6366
28.6	56.0462	43.209	44.2818	8.62682	49.5266	36.1233	53.8496	73.52	35.2615	85.5466	41.1566	39.844	42.0117	11.8361	16.9753	65.4789	64.2901	21.8647	63.385	12.1793	6.71584	9.3949	9.48887	-3.50033	21.7352	8.82884	8.31859	5.11803	10.7705	5.79558	-4.23274	-2.14013	0.277679	3.48805	4.25242
28.7	54.9461	44.7692	45.3542	8.87533	48.4684	34.6747	51.0228	71.3984	29.5242	83.839	40.8061	39.1255	39.8738	14.0488	14.331	67.7241	57.3716	23.1567	63.6243	12.3296	15.616	12.038	8.23648	0.965447	23.1519	10.7164	11.1996	4.35958	7.24695	4.79364	-6.75055	-4.92047	2.28736	3.26678	5.81552
28.8	48.6409	42.7625	42.6625	8.91968	48.5018	36.6007	53.5964	71.8122	28.8095	85.1397	37.4483	42.9449	38.9578	14.046	13.4997	69.0219	56.8936	21.4686	65.687	13.655	6.66076	16.7619	7.66172	5.3271	22.6222	3.47302	12.5875	1.80578	6.28265	8.03181	-1.9033	2.58732	2.16077	4.44891	7.30996
28.9	56.2343	41.6454	44.0188	9.35983	48.21	41.4049	48.7332	71.6489	35.8886	85.0205	44.2762	38.0485	37.8648	12.6912	15.0192	75.1923	53.509	20.9104	61.7067	11.8156	9.12179	13.1312	8.0518	0.339364	25.8431	0.183461	8.19034	2.8909	7.79762	6.35429	-0.546134	2.1943	0.560328	9.94553	4.88188
29	50.7013	42.6538	48.0131	10.5972	46.7229	35.7009	50.8667	75.1138	32.8716	87.9714	42.3696	42.7512	41.0334	13.3765	15.6534	68.0991	64.708	21.5959	61.5786	9.84514	4.09141	9.57786	8.60787	-1.23382	22.6072	-0.65375	4.76591	2.94504	4.48366	6.11352	1.91205	3.06823	-1.42008	6.38272	6.0938
29.1	55.1192	43.5786	46.4171	10.4806	48.1973	35.0237	51.0853	68.9366	36.2226	87.9529	43.5064	38.5471	39.3274	13.4047	15.9649	68.2247	53.8229	22.4171	65.1162	11.7453	7.99197	4.36642	5.69854	6.1608	20.5619	4.25227	9.8599	2.82021	9.26791	6.05314	-1.31521	-1.06304	-2.21596	8.69082	3.62835
29.2	55.1856	42.9785	44.4257	11.5309	47.0244	36.5831	49.6573	74.1969	34.8989	90.712	42.5624	39.598	33.4312	12.3707	13.61	66.5726	62.3672	22.8972	60.9844	12.793	8.48363	7.82966	-0.08241	-0.02172	18.4005	1.70023	8.01785	2.33751	11.6303	5.53633	-2.26913	1.24465	3.695	4.85906	-2.48185
29.3	53.1385	41.6694	43.4886	9.19516	45.7069	31.4618	49.974	71.3143	32.4545	89.915	41.6985	39.2467	41.5712	13.418	12.9359	66.8442	62.1985	18.3688	53.4297	11.277	7.96743	7.95621	5.34804	5.33756	18.8277	3.31097	6.61024	1.59155	-0.28319	6.76745	-4.39615	3.56695	0.410391	5.78356	4.48193
29.4	49.1935	40.4118	42.9797	6.99319	50.569	30.4577	51.0368	76.4426	31.0506	86.2376	40.1015	43.2163	36.8038	12.5897	14.085	65.0152	62.4139	22.8252	62.0752	12.8707	8.14745	0.497807	8.37937	1.46026	21.46	10.5459	11.6794	1.71704	15.9678	4.3682	-4.79769	3.62918	1.50103	2.86416	1.4499
29.5	52.7113	41.2509	43.9371	8.27099	45.3029	34.3826	49.779	74.2112	22.5965	87.1176	41.9841	42.0773	29.7924	13.75	16.3622	67.551	54.1273	21.1022	57.372	9.95124	10.1621	4.71757	3.12221	-2.20434	21.2165	3.19568	14.8398	3.21638	3.37645	5.36265	-4.33926	5.38175	1.52237	2.76221	6.17699
29.6	56.0869	43.8964	43.6674	10.4399	47.2706	38.4833	48.3052	73.5073	27.0971	86.8152	42.3457	40.9389	32.0172	13.7565	13.5445	60.8755	63.3	20.0595	66.0975	9.71522	10.7152	2.62528	4.8659	1.45385	17.5359	-4.23305	15.6738	1.85144	12.5491	7.89827	-0.893655	0.341171	0.95782	8.22368	3.20065
29.7	49.9986	42.8389	42.428	8.56318	47.1261	34.882	48.2921	70.0053	25.8189	82.969	41.1153	38.9246	33.0405	11.7308	8.55759	67.8166	58.2195	18.9277	56.5338	10.8758	3.93994	9.31249	8.88762	4.55335	23.2496	-0.13251	8.44301	6.28448	3.32273	5.38543	-5.49412	0.485479	0.309462	11.4234	2.73607
29.8	50.4998	42.3665	42.8267	8.45513	45.8663	33.1893	49.1635	71.0875	32.3672	87.5867	44.2446	38.5935	35.9127	13.4334	17.3505	63.8556	60.6568	24.9695	54.0615	8.35552	7.7874	10.3859	8.41334	1.07899	17.9582	-0.2302	9.0832	3.63894	1.37408	3.6747	-7.51195	1.901	0.87278	9.74022	4.55001
29.9	48.8684	41.0958	41.9023	7.40883	44.8447	33.9406	47.7976	70.5621	29.8179	82.2351	42.7658	40.9345	38.1517	13.0332	6.95046	66.3424	57.8445	18.7467	44.8675	12.1678	9.42453	7.66111	11.5764	1.33317	17.2554	-0.0475	6.04575	2.15661	0.863515	4.49867	-5.29677	-0.52757	0.718498	3.21844	5.49297
30	48.8673	39.0613	42.1292	9.0228	47.9962	34.4094	47.367	68.0715	30.0346	83.9248	41.3346	41.7412	31.9093	11.3891	13.7539	68.3675	58.5079	19.3699	50.8917	12.0922	10.1272	10.4937	0.666388	2.44094	20.1773	2.14441	5.9582	3.58471	7.07764	6.35931	3.55445	1.54008	1.70177	13.871	2.03831
30.1	51.681	40.4994	41.2359	8.67078	47.7844	32.0149	50.3285	72.4036	26.7356	82.8645	42.4993	41.6615	33.4806	10.9484	10.6764	64.2267	59.1052	18.7087	56.5639	12.8632	13.9291	6.79944	2.27692	3.18699	20.8527	-0.13854	9.35931	2.21341	1.88011	10.0912	-1.67727	3.27088	-3.29579	15.0015	5.52314
30.2	50.6077	38.3325	41.2063	7.68472	46.8409	29.8792	48.7465	68.8001	28.7067	82.7384	39.9706	37.4734	34.5687	13.3692	12.5281	66.2995	60.8432	20.1907	51.1666	9.76674	23.6825	3.3228	1.73602	0.115064	17.551	-0.86098	10.0359	7.23377	8.91727	6.59803	1.12414	-5.41642	1.00212	13.5077	3.68605
30.3	50.9685	39.6019	41.6733	8.39797	45.9241	35.271	48.2287	69.575	32.5973	81.9106	43.2854	35.9458	30.8168	11.7754	9.71642	70.4899	57.6016	19.2996	50.0487	11.5933	20.9835	6.20919	0.984655	1.52659	16.6668	-0.14811	9.12235	7.56983	8.99817	3.88632	0.406079	2.02558	1.87776	4.60687	5.86886
30.4	52.579	40.6674	40.8219	9.60042	45.9563	33.3305	47.4402	65.5092	25.2859	83.8729	39.9504	36.5172	33.8489	14.0961	15.7494	64.0574	53.0013	20.6046	53.8796	9.90215	15.2441	4.01386	6.48864	-0.63794	22.6308	-1.70296	8.6622	5.55882	4.15121	7.69268	-1.89134	2.90466	1.29295	6.17075	4.98152
30.5	48.0662	39.5951	42.2372	7.77994	44.751	34.0145	47.1609	68.0678	25.1238	82.7476	43.3682	35.0582	26.6148	12.2525	8.38229	58.0256	55.2039	21.1781	44.7499	14.034	16.9082	1.74368	3.85579	-2.39416	17.987	-0.16127	3.24582	5.5165	9.41234	4.25504	-0.0949028	-1.47714	-4.08881	9.85246	3.14236
30.6	53.5357	39.6433	42.075	9.72379	49.4355	32.9686	46.1382	64.7316	25.0769	83.9519	38.447	37.2186	31.2083	8.18643	14.5286	57.2495	60.1841	16.6276	52.3962	10.7686	8.34501	5.12621	8.45596	-3.35309	17.877	-0.37327	8.63655	4.54551	6.42816	7.99724	0.45819	2.03813	-0.67253	5.4263	8.81273
30.7	47.9032	35.8661	38.673	9.43652	44.0919	33.788	48.1477	63.01	27.4038	81.8636	40.148	40.0325	34.1216	13.4823	10.6252	63.0401	57.8334	17.3256	53.7978	11.86	13.691	12.4223	6.70022	3.55437	18.0447	-2.54767	9.64772	6.0209	9.21163	6.11029	3.97071	-4.41338	-0.73863	7.74245	6.36408
30.8	52.8786	38.937	44.8682	9.81156	44.114	33.7186	49.3378	63.1413	24.6342	82.2704	39.821	37.4195	35.1087	13.3299	19.5537	64.8789	54.78	19.8652	60.5029	12.2337	15.2916	11.3017	9.56231	-1.30775	23.9179	6.84305	4.85158	3.72082	0.283176	8.88342	-4.57032	1.79061	2.43032	3.71556	6.8044
30.9	49.5099	38.2137	41.4546	3.14858	47.1234	29.9903	46.5538	63.8257	23.9074	80.4326	40.4184	37.5594	25.4001	12.158	11.2202	61.1209	55.7532	19.2483	58.1474	14.7189	5.25472	16.09	6.741	-1.80755	20.7698	1.74606	5.60582	3.90756	4.85574	3.88152	0.917345	3.31698	-3.48508	2.35495	7.73378
31	48.9344	39.406	42.1262	8.4212	47.2366	28.7325	48.9651	64.1516	24.4247	81.616	40.8715	35.683	26.2789	12.3707	9.37224	63.1539	52.7441	19.3622	47.0814	14.614	14.094	5.52699	7.68153	0.961649	27.6344	1.9459	9.38164	6.26792	7.33111	5.80703	-3.42386	-0.08571	-4.69835	8.8221	7.55786
31.1	47.6046	37.5551	40.3128	7.47918	44.7047	32.5588	47.5244	62.7886	20.555	83.8122	41.8312	36.7141	27.6077	10.8307	14.9647	65.7574	56.6781	19.6025	60.154	13.0824	7.6229	2.38276	5.44308	2.24671	17.5202	-5.96567	11.8895	7.08168	11.4836	5.00634	-4.98015	-3.19664	-2.0144	8.29443	8.12292
31.2	46.866	39.4176	43.4274	9.7508	46.6445	29.7689	45.556	63.7952	24.3991	82.6441	42.3034	32.3398	31.2196	11.863	11.5661	63.4589	55.4256	14.6114	58.0553	10.1554	16.0102	10.2585	7.50419	2.83074	18.6814	-1.81123	8.15363	3.80007	4.31846	5.91403	-0.293805	-4.99533	-2.33572	6.49704	6.23655
31.3	51.5221	37.5863	43.2158	8.91182	46.6313	33.2956	44.9913	64.3272	31.0089	84.0954	40.7082	35.4874	28.7011	11.5624	13.4569	59.9918	53.9987	15.2586	57.4824	13.6438	19.7625	6.55033	3.87189	1.05233	17.6105	-1.3951	9.10832	3.27094	0.203467	5.22095	-9.33076	1.82371	2.4402	6.75815	4.63699
31.4	51.437	40.6309	36.1709	7.19565	41.8233	33.0047	45.1647	63.2666	23.2136	81.1825	39.9204	35.5799	34.3031	10.4022	11.0237	60.5359	54.9562	13.4621	49.9568	11.6273	11.2479	10.6718	4.44834	0.051898	15.5359	-2.03367	11.3833	4.44804	7.95841	2.7403	-2.0758	-2.57824	0.524984	7.62131	3.55877
31.5	49.2577	37.8067	39.6189	8.07055	46.5477	34.0356	44.9257	65.1493	20.378	83.626	39.7379	35.7756	31.1891	10.5232	10.3769	65.127	46.0531	9.44362	49.8638	16.4887	14.1666	0.572214	2.94682	-2.12332	15.5199	-5.25564	7.83371	2.592	15.7742	3.84521	-11.5352	-1.38958	1.85241	4.05435	0.608595
31.6	46.3525	38.9429	38.7721	8.26865	41.4143	32.8161	45.9276	62.882	25.5051	81.4897	37.6728	33.0294	34.9088	12.3796	14.6243	64.9828	54.5047	17.3425	48.3418	14.5548	18.3683	4.76326	7.27806	6.08788	14.5739	-5.45288	8.1386	3.97437	11.8297	9.62125	-8.45096	-5.21241	1.54261	13.2536	-0.00218
31.7	47.0048	38.9761	40.1067	7.82614	46.0119	31.0458	43.7658	66.4303	22.2588	79.3531	41.5056	30.6278	26.88	11.7932	15.36	61.1464	50.2124	20.0934	53.4653	11.938	12.4185	9.58743	7.64302	8.448	11.2791	-3.95068	10.3599	5.15946	5.02885	8.36958	0.240699	1.19714	2.97922	10.2608	0.391607
31.8	50.6355	40.2394	42.6901	7.01819	41.6581	29.4119	45.1231	65.751	22.6006	80.8844	39.0762	23.884	30.1799	12.413	15.2446	66.7615	51.7793	15.7932	46.759	14.133	11.3719	6.79727	2.89406	0.735848	17.0349	-5.13836	9.75417	4.61839	8.37813	10.5784	-3.66206	-3.15836	2.65433	7.61546	2.96535
31.9	52.6111	39.8498	36.2989	7.19802	43.993	29.4906	46.4204	63.2987	24.4645	79.4979	40.0895	27.9257	24.2399	12.2096	15.1325	58.8768	51.5189	17.2813	48.4244	12.509	19.1326	10.8486	9.00537	5.45592	9.59943	-6.98209	9.08577	0.99969	3.83774	6.79326	-6.39285	-4.4439	2.87305	0.732522	4.95467
32	49.7748	38.5992	40.243	5.96525	41.9329	30.3609	44.9015	58.9978	17.8416	79.1158	37.8844	34.6007	26.8009	12.5793	15.2598	56.6367	46.0836	17.6546	54.4677	13.8223	13.0427	5.65997	1.90664	3.50823	14.9083	-4.75994	10.9308	4.51163	4.42246	6.63886	-0.61595	-2.61491	3.68133	10.6278	1.17597
32.1	50.3639	38.3601	40.0892	9.43138	44.1463	26.49	45.0766	62.5665	21.5802	81.5336	37.0026	30.3919	31.3999	12.3088	14.4594	62.4001	50.3344	14.6142	47.7909	15.6078	14.7369	5.6585	7.43694	4.13298	12.2419	-6.02915	10.5704	4.67403	2.65109	7.346	-1.45185	-2.79687	1.39578	9.54639	0.352674
32.2	48.7116	35.3724	42.5021	6.70102	41.5258	30.5972	42.8734	61.2071	18.5226	81.135	37.6388	30.8429	27.1771	12.3748	10.1745	63.438	50.2688	18.1207	45.4556	12.1207	17.1936	1.55661	5.02883	1.33423	10.7128	-5.4805	7.47776	6.34708	6.35757	5.5232	-1.8355	-7.49797	0.479401	9.69474	3.20846
32.3	50.3267	37.6483	40.3618	7.95328	42.0095	30.7012	43.7133	63.0766	17.7285	82.5581	36.7132	27.2188	25.8355	11.741	12.2002	61.9139	50.6541	19.5528	45.9512	15.7155	19.3097	3.55652	-1.49156	6.43571	12.2004	-4.19674	13.687	5.6843	-1.44483	8.12091	-0.288364	-3.70939	0.125874	9.77129	4.48331
32.4	49.9775	40.592	41.0647	6.23676	39.832	35.3364	45.5097	61.1982	19.2584	76.4445	37.7172	36.2998	34.5904	9.90572	12.6208	62.3792	47.3313	18.3738	42.5849	13.1556	13.7754	7.16571	8.41008	2.24285	15.4288	-2.7729	10.9261	2.51541	6.61331	4.55909	-6.87558	-5.41686	2.07139	6.67262	5.3026
32.5	49.2668	37.4671	38.7368	6.67331	41.6005	27.8619	44.7902	54.9909	23.4444	78.3924	40.0714	34.2981	31.3563	11.3871	11.8665	61.8902	52.8483	15.5336	50.0673	17.8865	14.3716	10.4875	3.19204	3.84015	7.08909	-2.80547	10.3856	4.54038	5.24829	0.757663	-0.534575	-3.56388	2.8588	10.6566	4.11293
32.6	44.1787	36.2784	40.3702	8.14907	42.891	24.9047	44.4907	58.1729	21.9169	81.5177	37.9969	25.3234	27.523	12.9403	15.2848	64.3212	47.8724	18.5016	52.739	14.2495	14.1399	5.71719	1.66871	3.70668	11.4711	-6.22969	6.75225	0.509456	3.13774	3.88806	2.11904	0.330012	3.44278	8.66751	3.63061
32.7	43.1673	36.8172	39.7862	5.28942	42.6644	31.0462	41.8603	56.6689	21.7523	80.167	37.3724	33.8755	35.5377	13.8572	15.7342	69.0042	47.8348	18.9907	40.7494	16.9769	15.3325	1.82258	0.71858	0.405178	13.1094	-13.0831	7.86154	3.75924	5.93726	6.28639	3.43759	-0.13991	3.73235	8.26117	7.1452
32.8	44.3717	38.4642	38.7399	6.26541	41.3845	28.4578	42.3724	53.439	23.3169	79.2507	37.0968	39.4058	30.201	9.67405	10.7905	63.0428	49.8194	17.4298	37.1901	15.4394	14.4842	5.04108	5.24563	0.726685	12.1552	-7.74159	6.2834	5.48371	9.71815	5.09214	0.977586	-5.93835	-2.02136	8.76478	7.60107
32.9	45.1314	37.7284	36.4449	7.74096	40.4108	26.7418	43.4092	56.9453	21.8137	78.7644	39.3171	33.8353	30.4222	10.2463	12.5362	64.5014	47.5896	14.769	45.8412	21.9242	9.96592	10.8742	6.04092	5.09473	13.0192	-8.03301	6.94482	4.02568	-1.36021	3.80617	-0.3692	-2.79114	1.51717	4.3878	5.14599
33	48.8624	36.9538	43.0992	7.47286	41.033	28.3344	44.6195	62.0396	18.185	82.0358	37.4557	26.4239	29.3836	11.1842	8.33472	65.5911	46.4231	15.4017	41.5895	15.609	10.76	8.44703	8.2387	3.46267	12.7338	-4.53012	7.30093	2.64813	-4.59782	5.11344	-7.33919	-4.84157	0.757668	3.27187	4.11097
33.1	44.8827	38.5721	38.9491	7.14062	42.8686	32.0346	44.4924	57.7518	18.6242	78.6264	34.6248	19.8541	31.0249	11.0117	12.6387	58.6231	48.795	19.1352	48.6329	20.9244	20.3158	5.92639	7.05438	1.80324	11.7581	-5.9603	8.42495	3.08557	10.9716	2.75761	1.75408	-3.85292	1.99671	7.138	2.71587
33.2	47.6984	37.1253	39.1227	6.90724	41.7492	32.0308	42.0868	56.5617	12.3536	78.8044	35.5656	29.3351	30.831	10.3479	12.5656	57.2923	47.1818	15.6629	43.265	17.2498	19.1102	8.96406	1.40752	4.12421	12.649	-3.95494	7.03048	0.717404	7.81666	7.89673	-18.6034	-2.1865	-1.00082	12.0034	5.06135
33.3	50.7594	36.7133	39.1624	6.8088	43.3439	27.7597	37.6955	59.5467	24.1136	79.966	36.4054	27.4489	27.2077	9.43637	10.7606	57.6228	46.2716	19.5267	43.4002	12.788	18.865	2.04833	6.59374	1.58504	15.5447	-6.67323	8.44255	2.99349	6.89474	4.79932	-9.99097	0.268439	0.430414	8.06555	0.805288
33.4	44.8048	38.1013	38.18	4.13448	39.7455	26.062	40.7167	61.4456	19.204	79.9751	39.4672	29.6883	31.9103	11.0263	6.99647	60.1054	50.3738	13.1893	37.9312	19.1526	20.2746	4.87955	5.09176	7.1493	15.1198	-5.57654	0.817053	4.03887	4.32332	5.33916	-12.1624	-2.18795	-0.42611	12.1502	0.505709
33.5	42.2638	40.0202	40.3599	6.20497	42.1735	29.9214	39.9084	60.9696	19.4429	78.6295	37.2508	32.5758	24.3015	10.749	13.5277	53.4449	47.2799	16.3157	44.238	18.0321	20.4359	4.65406	-0.80985	3.93855	10.6526	-4.01361	9.88481	1.86905	8.36833	2.60122	-13.7127	0.962894	0.545299	10.4185	7.57876
33.6	42.2431	42.4389	38.5713	5.53453	41.1443	30.0093	40.7001	62.0883	20.9867	79.1224	35.5135	31.293	28.6964	11.8673	10.5313	56.9579	45.2397	15.6848	47.162	13.1773	21.6055	3.92451	5.32661	2.03045	15.1344	-1.94458	8.2126	-0.88959	2.31399	5.41468	-9.8645	-1.87989	3.57928	12.1354	-0.12123
33.7	45.529	43.0151	38.7972	6.10021	41.3729	32.3011	35.8287	60.6052	17.9971	78.061	35.242	31.9744	27.5451	9.73489	11.4437	57.507	49.6372	17.9855	39.3305	19.1024	20.9117	0.397173	3.97783	5.8541	18.4235	1.51146	8.01854	-0.40426	6.10458	5.68702	1.95647	-1.99641	0.435743	10.5668	2.55965
33.8	44.6031	42.837	37.1709	5.67016	40.6489	28.0371	38.8623	61.9551	17.421	77.3587	37.7489	27.7586	32.2864	11.4459	14.5674	57.5335	50.7292	15.0628	43.5721	19.0798	20.3174	0.35752	5.10718	3.97755	18.0063	3.26582	4.69919	2.15583	8.52423	5.1439	-17.2861	-6.4275	0.702881	12.1727	5.59326
33.9	46.4626	42.0247	37.819	3.82234	37.9501	28.3162	37.8148	62.7076	16.5043	78.5665	38.2092	31.2684	30.51	10.1034	18.3569	58.9902	44.9488	16.8945	40.2935	14.4472	19.9936	5.24902	9.84784	2.43481	9.92825	3.83092	10.7938	-1.62318	7.67212	4.19629	-6.34804	-5.53085	1.82912	7.95741	3.86248
34	43.898	44.225	35.2121	6.06025	39.7883	24.054	39.3923	56.2915	15.742	76.4861	35.628	18.7289	26.7499	10.5275	13.6632	57.1627	52.0691	13.7871	39.2746	19.568	19.6992	4.12083	13.711	-1.30687	5.42568	-5.74238	7.15983	2.61816	3.08655	0.518595	-41.3271	-3.60283	1.0049	5.25522	3.83346
34.1	41.9617	45.7122	39.4392	3.75677	39.9256	25.4316	41.1029	60.1522	19.4167	79.7738	37.0147	23.1888	30.6635	13.3185	12.4567	66.0378	40.7582	15.1013	40.7094	18.752	17.0966	9.866	5.29001	5.09999	11.0855	-8.68297	7.52169	1.4533	8.63051	2.09665	-11.4618	-1.26901	-0.61364	1.45884	6.37808
34.2	43.897	43.0209	35.9009	5.86815	38.7854	26.6743	39.3148	62.9626	19.0589	77.6524	35.3055	23.3952	29.4407	10.9174	12.3556	58.7559	47.0778	14.6037	39.3924	15.8336	19.748	2.76591	4.99227	1.1958	7.97711	-4.60353	5.67431	6.22031	1.97153	2.00166	-25.5975	3.81944	1.19433	7.19798	3.48825
34.3	44.0764	43.7025	36.9523	5.13386	40.3687	25.2537	37.0314	59.2099	20.4935	80.6111	34.6381	30.8481	26.0457	12.1448	13.4207	62.2074	45.0322	16.2317	45.8701	20.3605	9.87333	10.0664	2.18355	4.17622	12.3881	-2.65777	6.79293	4.40369	10.36	8.76238	-17.0315	-4.00515	1.50585	11.4016	3.73285
34.4	43.3009	43.939	42.1722	4.69662	40.6765	26.6901	38.6301	59.4506	19.5967	77.3092	35.3793	27.9064	29.4194	11.8479	13.8564	61.8511	45.1238	12.3297	38.327	21.5212	19.8629	5.2502	5.80985	0.542419	7.19609	-3.08736	5.06836	4.09311	7.4989	8.35489	-32.6914	-0.50103	0.577397	6.4111	4.86118
34.5	43.0812	42.3039	37.8383	5.32975	38.3593	24.1428	39.7241	59.3356	19.8261	79.5924	36.71	29.7697	26.7985	11.5422	14.424	62.141	46.1022	13.983	43.8183	17.9021	17.7255	2.13241	7.95048	-1.04774	15.5983	-6.44063	14.1844	3.89232	4.76741	5.26632	-14.7139	-0.31026	0.511847	10.4267	7.54226
34.6	43.3067	42.1781	38.5861	5.66937	40.5306	23.392	39.9532	58.0333	18.2735	78.8736	37.8224	27.8038	28.1642	10.8087	11.954	54.0909	47.3827	14.3308	41.2237	20.8788	13.0034	6.20698	-3.31103	1.98598	9.70371	-6.13763	4.82942	3.2939	5.32322	6.91549	-4.95558	-1.63689	5.59019	8.91135	0.080646
34.7	45.7082	41.636	37.7967	4.11092	36.3344	24.7326	37.7803	59.7211	9.54256	78.7993	36.1812	25.4345	28.011	11.4055	11.7687	59.7413	48.6558	14.0037	42.0084	20.1737	8.61212	5.51271	5.67063	-1.12374	16.75	-5.12759	8.19553	3.26776	5.41291	6.80351	-4.36592	-4.61628	1.7409	6.89261	8.67751
34.8	45.2291	42.7439	35.9194	5.64341	37.637	25.3918	38.583	58.2907	24.0463	77.0933	35.0445	32.6935	27.644	10.9908	7.64834	54.7794	40.0489	13.6434	39.4786	20.4377	18.7549	7.69953	-3.63419	0.837151	17.1871	-7.56432	10.5307	4.1171	10.881	4.67104	0.57879	-0.35222	0.475212	10.8858	3.41933
34.9	37.7609	41.1802	35.8007	5.80832	40.2928	25.0774	38.2124	61.419	15.8842	76.8732	34.0922	27.6885	21.7445	10.3809	-20.0067	58.5204	41.4294	14.0359	38.2332	18.8473	17.1835	7.38473	3.59446	-1.68573	14.1127	-6.54025	2.26044	4.61633	13.5968	4.31644	-0.336777	-1.88134	-0.75336	14.2671	9.9951
35	47.6362	42.4475	36.0429	4.39984	40.5556	25.3716	44.0472	58.8429	21.2469	77.3553	37.9415	29.3757	26.1429	8.88468	-16.7035	56.1955	41.5939	11.0285	34.2278	17.3811	10.9128	12.1808	1.41792	-0.12953	8.50892	-5.28675	9.21833	5.20854	0.474528	6.32988	-0.740719	-2.46451	-2.03564	13.2712	4.24477
35.1	44.1343	41.9827	33.7787	5.36574	37.1867	29.3636	39.7685	60.2362	19.5515	76.3556	36.4403	26.2945	28.3776	10.5769	-14.3181	57.2842	44.9656	15.5735	38.1311	17.2369	13.7586	-0.62084	4.51299	4.035	11.3144	-8.70732	4.71722	5.05589	11.1291	11.2807	1.49987	-2.40798	1.68368	9.44504	3.67516
35.2	43.6716	43.6367	36.1817	4.33656	37.6614	26.7928	36.0293	62.5775	18.4723	79.2088	33.1766	24.6027	21.0249	10.2836	-10.5592	59.0707	44.7185	14.9407	35.9352	19.157	16.1741	8.43037	5.28452	3.10691	8.71138	-8.96732	6.1237	4.53335	5.61723	4.11181	0.515161	-1.78744	-1.15421	8.61871	5.10803
35.3	43.9994	43.6205	34.2528	4.49993	38.7385	26.5041	38.8564	62.4364	25.4437	76.0148	32.4132	29.9615	25.905	9.92478	-8.95703	55.8131	44.3015	16.0628	43.2517	14.0493	16.7954	6.92124	6.45055	1.65881	11.0831	-17.1684	2.90258	2.57973	5.20774	4.30193	-1.09373	0.852661	0.889777	10.3937	4.37852
35.4	46.8621	44.995	34.6779	4.6588	37.1925	26.0324	41.5883	56.7637	19.8213	79.4363	33.5874	32.2452	25.1747	10.4441	-19.8735	58.7264	42.3299	11.9428	45.2441	16.3598	17.38	2.61325	9.28198	3.12408	8.84027	-13.7511	9.03952	5.2741	10.0054	4.58731	-1.61161	-3.11775	0.726776	10.3245	6.50461
35.5	43.3946	42.063	33.1256	-2.66364	36.638	21.8537	42.9039	60.1615	19.1243	75.8559	34.3701	29.8357	21.6333	9.94302	-21.9274	58.8098	51.9573	14.2702	42.3377	15.7466	12.4522	11.2973	10.0198	1.19411	7.45672	-10.993	5.84949	3.72613	2.49267	0.272945	-3.05562	-5.31645	0.765615	4.1563	3.32292
35.6	40.9434	41.8378	33.6908	-3.81828	36.8961	25.0188	42.4842	53.5697	19.0095	75.6808	31.4949	28.4494	29.2502	9.7817	-12.7565	59.6245	43.5316	12.5266	38.6004	21.3082	20.4389	3.02924	-0.37069	2.59835	6.54026	-5.57408	10.8131	2.60101	9.20142	2.99749	-21.4074	0.709536	1.60215	6.25636	4.92096
35.7	46.5517	40.0172	33.1821	3.35095	36.9605	24.3473	39.2009	55.3804	16.9284	76.2846	33.1133	26.5156	29.2451	10.3971	-16.9531	59.1533	48.7723	13.669	40.1499	16.5447	15.6331	3.26389	6.90916	3.6584	13.5951	-2.27344	5.95542	1.90872	6.80696	0.962422	3.48513	-8.61224	-1.16045	7.34747	6.32557
35.8	47.6382	43.8188	33.8381	4.19663	35.4821	20.7134	38.7394	52.587	17.3882	76.0182	32.634	21.9606	26.1458	12.2973	-18.0174	53.8944	39.8389	13.7613	39.0522	19.6063	10.582	2.88442	1.26968	2.5662	17.866	-8.53938	3.84681	0.422603	7.18051	6.08466	-1.93148	-3.77245	1.28397	4.97223	2.15015
35.9	37.9236	42.537	35.5412	2.92607	35.4958	18.0445	36.8033	53.0418	17.9372	77.276	33.9382	18.6007	27.3051	11.2616	-16.6583	51.2331	43.7595	13.0636	41.8927	17.2225	8.21647	8.54519	2.23328	10.4289	11.3854	-5.24478	8.2542	-0.11624	8.92056	1.02482	-2.25593	-3.72815	-0.02394	5.93196	6.18788
36	38.664	41.1402	37.7389	0.684622	35.7734	25.523	38.4904	55.8237	18.137	76.0562	32.5227	15.3821	27.7887	10.7535	-14.7533	55.5137	47.7131	15.2721	47.9483	17.7652	17.3689	5.85371	3.58607	2.34031	10.369	-5.81974	7.24572	2.74462	0.655141	6.64904	-2.07921	-4.46121	-2.38113	6.90616	6.75206
36.1	43.2611	40.3552	36.1631	4.44154	36.8495	22.3433	35.3486	52.9333	25.6851	78.7754	33.6039	17.9864	26.6902	9.40607	-11.4704	51.442	46.9979	14.5734	37.5432	18.6979	20.1528	8.68522	4.4472	5.61202	11.2849	-7.8472	3.36274	5.37072	4.26513	2.58678	3.81493	1.34243	0.338764	14.6769	5.3665
36.2	41.0977	40.9911	32.6292	4.36387	35.7757	20.8791	34.3945	54.8477	23.1213	75.338	28.3221	23.2918	28.178	9.25607	-17.0789	53.664	45.6788	17.9277	50.1678	17.1482	16.1649	6.85208	2.10791	0.513232	10.6868	-3.43239	11.8944	8.84237	7.31347	6.91195	-9.8578	-7.09566	-0.69797	13.1688	4.42236
36.3	39.8512	43.4078	35.5722	3.62486	33.6128	16.6466	36.8783	57.2136	20.3618	73.7626	29.9568	23.9936	32.0732	9.80288	-16.6733	53.1306	43.8591	14.4502	35.4957	20.7069	15.8861	6.02078	5.1645	7.08596	5.34256	-8.90909	4.42972	-9.20517	6.57211	4.83175	-12.7525	-2.55466	-0.70965	14.495	0.723706
36.4	37.6254	42.1306	36.3581	2.32155	33.0616	14.6671	33.6697	52.9174	25.2776	76.1484	32.8045	27.7421	23.5903	10.5489	-18.7959	54.3277	40.2449	15.2088	37.4058	18.2085	18.1649	4.61064	6.47711	-1.23541	12.7957	-8.03635	7.35194	-0.85684	10.8691	2.08204	-10.6065	-0.60769	-2.02631	13.9271	6.36849
36.5	40.924	39.2849	35.0842	2.84923	33.2934	19.3766	36.2401	46.4512	22.1189	73.7784	29.0077	23.2721	30.8931	9.87887	-19.9335	56.2476	40.8952	16.9413	36.5401	15.9407	13.5136	7.83756	7.76545	0.016239	13.0333	-1.13964	8.54238	-2.47079	9.13165	0.369512	2.87901	0.636021	-9.0589	9.87261	7.82355
36.6	35.6197	39.0253	34.0521	4.41277	28.6456	18.5285	37.6106	52.7445	23.4803	73.0484	32.8537	32.3429	27.1656	10.8422	-18.502	51.9907	37.5953	15.5041	42.4489	17.8573	18.216	4.05208	4.27412	1.03823	12.8144	-8.89674	11.3791	-2.71304	0.344887	3.42238	-0.78618	-4.82138	-7.55417	16.2399	3.5656
36.7	39.8202	39.046	36.1625	1.88378	30.0511	20.1466	35.541	52.8366	24.354	73.3987	32.0292	24.6561	28.5164	9.89535	-17.1399	48.0801	39.4761	13.0872	33.5554	18.5957	16.1216	8.53531	5.8312	3.28707	9.64757	-10.779	8.02957	-5.83795	11.7835	3.94095	2.01458	-0.56542	-5.4136	16.5836	0.452581
36.8	36.8052	39.9292	34.2397	1.19137	31.8422	19.8906	34.3638	50.1577	23.1316	72.5376	31.977	23.9746	23.8186	10.3309	-12.7175	55.1669	40.3844	16.1241	45.619	12.9326	17.7535	2.4765	4.71104	5.55114	8.28275	-7.30733	12.1356	-3.21445	3.4926	1.66829	0.887448	-0.98409	-4.12102	10.9355	4.48793
36.9	37.1188	39.9691	34.8761	2.12724	28.9306	19.6234	36.5861	50.3101	20.8554	72.9257	29.7808	24.5117	26.271	9.02952	-9.80025	53.411	38.8007	12.0032	40.5748	17.8237	14.5027	7.80788	6.9725	6.01826	7.42605	-8.21178	6.72745	-2.59295	4.87159	3.60337	-2.63605	-0.78893	-2.13293	8.827	5.51158
37	37.1679	41.0134	33.9449	3.81678	29.4516	22.6013	37.4255	50.9945	23.1528	74.5877	32.9003	29.6702	26.8732	8.73464	-10.8875	50.3372	46.2518	10.1879	41.5646	19.797	16.3048	3.68892	7.63228	5.86277	13.999	-9.7347	5.16337	-2.10391	5.06929	6.69751	4.14981	2.98884	-7.29076	14.3863	9.60595
37.1	36.2532	40.2067	33.7099	3.21417	32.0527	25.3737	33.1933	53.5666	22.1792	74.7883	28.7664	24.2358	27.8932	9.27937	-6.85492	46.6961	43.5053	17.0782	37.2981	16.4884	19.4421	7.93994	6.74788	6.17942	8.82973	-10.5153	9.68875	-6.85401	10.4698	3.2772	0.822721	1.30568	-1.60331	10.1802	8.84538
37.2	39.843	38.6273	36.4577	3.70164	28.959	22.1195	36.1011	52.3851	24.7734	73.6501	30.2262	24.5304	26.9564	10.4325	-3.69326	49.8407	35.5958	13.7798	34.0465	19.5775	10.9793	4.4771	6.91899	6.87289	12.0773	-9.92866	7.08133	-6.59613	2.52817	2.89384	6.58324	0.095562	-3.7714	15.325	7.96659
37.3	37.5335	39.8215	36.4025	2.27969	33.5508	21.2675	36.9351	51.0685	24.2561	71.6661	31.3249	27.2123	25.2963	9.92718	-8.01876	56.4826	33.3861	17.5332	44.1991	20.7116	19.9377	-0.87398	5.17111	4.22411	11.0933	-6.82306	3.26419	-3.19467	13.2229	1.53686	2.63208	-2.43204	-4.84078	15.2089	3.88035
37.4	34.7478	37.8068	31.8427	2.91559	30.9839	22.052	36.8837	47.7338	24.9583	73.5177	31.9102	28.3336	26.065	8.68017	-7.6228	48.1692	40.5971	10.5686	46.488	17.6295	15.6899	11.3164	-1.10491	1.78051	8.71393	-2.26596	7.94995	-3.44635	2.26717	1.14036	1.01194	0.923652	-4.02521	12.4406	6.5126
37.5	35.8434	39.6404	35.0521	2.83955	31.4066	19.7163	35.2838	45.1534	29.3296	69.2044	30.9514	18.2237	23.6324	8.38159	-10.9613	50.1975	30.6367	12.7987	35.9012	16.3453	16.2088	7.95011	4.15722	-2.89507	9.43574	-3.68869	9.50388	0.89561	6.93967	2.54588	-0.874225	4.2013	-4.17423	11.4853	7.84793
37.6	38.4911	37.7415	29.4233	2.48633	28.805	24.5398	35.4019	48.1851	22.2736	71.9658	30.3894	26.9476	26.1361	8.50699	-4.88505	49.2693	37.1255	11.8391	30.2784	16.5496	15.9952	9.8318	8.6461	6.70633	9.43623	-6.82896	6.93017	-2.10223	6.98728	2.12076	-0.962345	-2.24486	-6.78304	8.7957	5.71071
37.7	40.9348	38.6949	31.0467	2.50271	29.9633	24.3095	36.6186	46.1162	19.375	70.5244	32.3294	30.2517	21.6161	9.04626	-3.77304	47.6801	34.548	13.3987	31.3589	17.0582	18.6719	0.539745	6.78212	3.39293	13.6416	-9.6503	4.21056	2.69871	6.40132	7.46148	-1.68753	-4.79738	-8.00513	18.1092	1.77733
37.8	39.5154	37.1659	32.4397	3.20864	32.1786	17.4191	33.4707	44.526	24.2375	71.7109	30.0549	24.9208	29.8139	8.99462	-3.54497	53.6658	34.8197	11.1247	34.292	15.3714	17.4451	8.67403	5.83955	7.37434	13.2397	-6.29519	5.48559	9.39576	15.9631	4.22356	-16.1349	-2.05808	-2.34369	14.2113	8.21029
37.9	39.8867	35.4606	30.1861	4.45689	28.4767	19.6746	32.9963	48.6914	25.0579	69.7234	30.346	24.6519	27.3331	8.59196	-3.96743	47.1581	38.9493	13.4422	31.1098	18.0318	14.2416	11.2942	6.48924	5.06511	13.7609	-11.0845	7.4668	0.667073	7.43323	0.151403	-17.7157	-1.75174	-4.56632	14.7369	9.08049
38	38.5288	37.7854	32.6712	1.48467	33.0758	19.2705	35.0836	47.3215	27.1647	72.2372	32.2362	22.3821	22.4961	7.92467	-3.77439	50.2591	33.1976	14.7186	33.9678	20.9941	14.2618	3.12788	4.95329	4.4446	11.9709	-6.84344	6.00678	1.94662	8.46623	0.926028	-45.0953	-3.69255	-2.06642	14.0524	5.43396
38.1	35.7856	37.2353	28.4026	2.49331	33.0283	19.1632	34.1204	44.9966	26.5132	70.0891	32.0397	22.0188	22.0062	8.88467	-7.45085	50.3125	34.594	12.7878	37.0516	15.5593	17.0819	4.60125	-9.5794	-0.75271	13.8153	-10.2986	7.10599	0.830758	8.24091	1.80607	-13.6701	-2.18629	-6.63737	9.45395	4.21614
38.2	39.3048	35.2626	30.0773	2.60309	31.571	22.3041	38.247	47.4551	17.2099	69.1144	29.8701	22.1731	19.0234	10.5558	-6.26329	46.5588	36.3145	12.0963	41.9569	13.777	19.034	1.11853	-0.76729	5.92809	11.6279	-7.13139	5.1453	-1.07441	5.96712	5.51924	-0.940659	-2.69402	0.475114	18.6345	-0.16592
38.3	36.4058	34.4078	30.5359	3.19691	31.9094	17.6585	34.7786	43.2603	28.8658	70.8938	29.9506	16.7891	23.3494	6.88353	-3.38694	52.5302	30.0352	13.6408	34.5153	16.15	16.0445	7.50893	0.43652	2.21971	10.776	-8.79156	9.6151	1.46944	10.036	7.25846	-7.25865	-2.33278	2.18513	16.6851	5.92701
38.4	34.7967	35.7561	30.8293	3.72485	29.1798	22.8276	36.3321	41.7983	27.6657	70.7166	29.5973	20.6512	22.2246	8.86543	9.80073	50.7239	34.2774	14.7634	29.8278	18.1854	13.1342	4.68943	4.59783	2.96516	10.8642	-5.73956	1.24255	2.79855	6.85122	5.2079	-5.98976	-3.57056	-6.39927	14.8733	7.70374
38.5	38.4116	37.125	31.2289	0.961518	29.2196	18.0856	35.1332	41.6028	24.6842	73.3718	29.7526	17.3019	22.0743	9.63153	12.6421	51.5959	31.7891	13.8205	33.2093	21.4721	12.3646	9.61796	1.11153	1.4068	8.74383	-7.79658	3.23509	-1.0715	7.70043	6.1346	-35.4297	-5.36834	-7.07119	16.7714	7.34736
38.6	32.9675	36.0003	29.5856	0.797465	31.4519	21.4669	33.8145	44.9296	23.2664	70.5879	30.4697	22.067	20.7598	7.74457	12.5567	51.6662	37.723	12.8874	36.0979	17.0875	13.1225	7.26753	5.52979	-1.54151	15.1194	-12.4579	5.30606	0.408701	3.85489	3.53384	-2.51981	-2.0868	-1.83319	17.8511	3.24964
38.7	33.7647	34.9349	31.3858	1.63039	27.306	23.2501	35.3166	43.7524	19.2907	70.6368	30.1508	27.8127	23.483	7.71698	13.6113	46.3527	41.7134	15.6004	36.3538	17.0879	22.9296	4.02314	0.068681	5.09357	14.3936	-7.03388	9.82567	-0.98231	2.53856	2.12338	1.26097	-3.32285	-3.463	14.477	3.39767
38.8	30.6138	32.0868	30.6751	2.37093	28.6347	20.3309	36.1744	38.5103	18.7742	71.4227	29.6843	27.3227	18.5389	6.00328	10.7617	52.2407	39.5893	12.9184	32.6887	13.3858	15.8582	11.0198	3.38495	1.40453	11.5763	-12.5868	9.37698	-3.72962	11.4522	3.78363	-9.82141	-6.53906	-2.66656	16.5592	6.98375
38.9	33.075	34.3133	32.0247	1.51948	30.4192	23.0097	34.1456	43.2835	17.8041	69.7523	29.6084	18.7125	21.2544	6.21921	9.73238	50.3258	31.3885	14.1813	30.0243	14.3267	17.6301	2.49485	-2.49193	-0.34654	15.6227	-10.2371	7.8089	-2.851	3.50922	0.806839	-1.52935	-3.80806	-1.50889	14.6358	2.79805
39	31.7557	33.8842	32.5877	1.53333	30.4962	22.8979	32.3754	41.2356	24.1079	69.3429	28.5248	19.8041	19.508	5.73198	8.97611	40.4963	35.6452	13.8059	30.2231	14.5708	12.7449	4.84968	-5.54568	3.3442	14.7956	-11.4535	6.09181	-1.13268	3.73188	2.99447	0.614139	-5.77439	0.743873	13.1123	3.52164
39.1	36.026	33.6931	30.148	1.9151	26.9671	21.9573	33.0708	44.8063	19.9401	71.8549	30.6932	20.3529	26.5441	6.23893	12.1957	49.1792	31.1405	10.9567	31.4598	14.9157	16.8589	3.53342	-4.58071	4.21167	15.2247	-8.37253	5.7768	-0.46495	3.55867	4.71875	-0.812687	-6.87117	-2.54695	12.4222	7.25613
39.2	33.277	33.9787	29.5831	3.78954	28.5107	21.2541	31.9504	45.3796	18.1603	68.6834	27.8892	24.0174	20.3297	5.24945	8.80751	43.3706	30.4606	13.9922	24.243	14.487	18.8904	4.61151	2.5913	11.4421	14.6367	-5.60707	7.12172	-0.14301	4.172	4.46962	0.531484	-0.47998	-2.3273	9.18206	0.931791
39.3	32.1784	33.455	30.8414	2.3584	29.0653	20.3854	35.1318	47.2608	17.8561	69.603	28.7086	27.9791	18.9684	6.82501	10.1763	45.0023	29.7803	14.4671	23.2969	18.4811	21.9621	4.24367	1.03738	8.22274	14.6597	-7.79668	7.89526	0.695199	5.99689	3.16557	3.11908	0.351134	-6.7818	14.6546	4.70655
39.4	30.0697	32.5225	30.8339	1.63606	26.8415	21.489	32.9118	41.6897	18.5286	66.281	28.8786	26.3682	21.9743	7.27624	4.33817	45.4486	38.4124	13.093	22.4734	15.2553	14.584	-2.07675	-6.19314	1.42103	14.3726	-5.67303	8.41881	2.04698	1.2812	3.60198	6.20982	-1.87936	-4.04292	14.9497	4.71602
39.5	31.3285	30.8223	29.3367	1.15949	30.2133	22.5128	33.7705	44.1191	23.5859	63.373	27.3871	23.8484	18.5315	6.22161	7.2432	48.0549	30.0781	15.1317	26.4175	18.1344	14.6049	8.79739	2.39477	1.83761	16.3601	-4.94193	4.8127	-1.35874	4.75216	4.36596	9.36032	-3.49044	-4.61873	11.8873	4.09508
39.6	28.0491	34.0506	27.0143	2.51021	27.464	20.5818	32.7984	45.8839	21.2203	65.908	29.1417	25.5109	16.4521	8.55323	10.6691	52.03	27.3753	12.3054	28.7037	13.4329	16.0479	5.13286	3.7526	3.72987	16.0392	-10.4468	6.26151	-0.50459	4.20579	5.27835	7.33676	-1.69795	-2.5601	14.5374	6.59377
39.7	29.55	33.3904	30.2231	1.59199	29.159	21.7364	31.9858	39.0038	21.1847	70.1624	28.5655	32.8981	21.2179	6.62698	11.6229	48.2251	37.1711	10.4016	24.7632	14.7226	12.1687	5.41865	-0.31534	5.63955	14.8206	-5.34349	8.54764	1.45878	7.11708	6.99179	6.19845	2.17021	-8.08302	11.0654	7.68661
39.8	30.3154	32.224	27.0783	1.86871	29.0921	19.567	34.0547	39.3616	20.5551	68.7139	28.2875	30.8187	21.0763	6.99607	13.2102	49.3126	31.2572	12.1194	29.3964	17.7851	17.6141	-6.5659	-2.80172	0.936893	14.7242	-5.18184	6.26936	-1.25295	3.40178	4.25445	6.106	-0.90501	-4.46683	13.2432	10.2173
39.9	31.5924	36.1108	28.5782	-0.65175	30.6464	20.8049	33.3076	41.3136	20.7566	68.2719	29.4736	22.1994	27.0148	6.3387	12.1931	46.0191	30.1753	11.7312	30.5783	14.0651	11.3359	6.62504	-2.49052	4.64998	15.0363	-7.15889	7.5536	0.466697	8.41561	3.60117	-1.75609	0.247777	-7.36142	18.8017	1.0203
40	30.4785	33.2789	28.4782	1.47256	29.0072	21.5701	34.1864	40.4276	26.8467	68.2812	27.4434	27.37	23.5581	7.06196	11.099	45.0829	26.2725	12.9344	27.3945	14.3265	11.5116	3.95016	2.7263	6.18888	13.9062	-7.46764	4.56356	1.07055	3.68052	4.22044	0.378766	-2.36261	-9.26801	19.2578	5.24252
40.1	34.4629	30.5318	30.8373	2.67657	27.4634	22.0003	33.2945	46.217	21.2708	68.1658	29.3122	23.7178	15.6647	6.30145	7.80054	44.699	32.8663	10.7213	29.5413	14.5672	17.3985	-2.47321	-0.42499	-2.20718	15.1411	-9.76013	6.93059	0.004222	14.0771	0.225487	1.81187	-1.70286	-9.28209	15.1736	6.19124
40.2	29.3946	32.0569	26.8545	3.08387	28.8712	22.9509	31.1407	43.6494	19.9839	64.2998	26.4516	29.7321	20.8627	6.77962	9.52132	45.8871	32.1438	12.1909	30.1005	13.7953	14.5216	0.695713	-5.21157	7.67621	15.2152	-12.1878	7.67141	-2.34621	12.7871	5.91396	5.14889	-4.01407	-13.7056	15.1519	4.92321
40.3	34.7178	28.2868	26.2582	1.61783	26.7304	21.5377	32.7421	45.0107	17.174	68.4751	28.1069	20.6575	22.1057	7.48474	10.105	46.6299	28.651	11.5279	25.6468	16.447	12.4489	5.21241	-6.10062	1.18866	17.5005	-12.4957	6.02709	2.77677	4.14549	0.266209	7.11784	-1.25044	-17.4578	13.5509	4.92593
40.4	31.2519	31.5862	28.6775	-12.5024	27.7889	22.017	34.4926	40.3556	18.1864	69.8024	27.0865	24.5065	23.4529	5.86703	14.9232	39.0443	30.331	12.977	29.3459	16.3561	12.4568	15.8689	1.34212	4.16185	19.9377	-6.89494	6.32699	0.480254	8.16656	-0.89129	3.19245	0.136824	-3.68374	13.5142	2.58015
40.5	30.4512	33.9985	30.312	-14.2251	30.2394	19.9651	31.2001	42.6065	17.7216	69.6953	21.6783	26.7276	20.3019	7.25114	12.0494	44.7925	35.7246	10.4521	19.0042	15.1648	13.4345	9.79287	-6.26101	4.51377	20.5002	-8.36043	4.66458	0.591687	4.45294	4.93802	4.38941	2.42783	2.1317	13.9413	5.78514
40.6	25.6798	31.0917	27.0393	-11.6876	27.5464	18.764	34.4203	38.5821	25.0434	68.522	27.432	20.7369	23.9058	6.42851	5.91448	49.3475	29.9821	12.954	21.9612	18.1451	12.8665	7.11461	1.97838	3.07402	14.0432	-11.4495	7.95506	2.91361	4.11117	3.37878	4.35563	-0.66505	0.876112	12.0872	5.45591
40.7	32.7806	30.5164	31.6627	-13.0978	25.7515	16.5157	32.6769	40.3426	22.4858	65.7144	26.8382	19.0196	22.6102	7.42408	11.8057	40.8131	26.8349	14.949	28.2997	15.6141	13.353	-0.79927	-5.96826	4.57212	15.7394	-10.0021	4.95359	0.024964	6.75391	-1.5972	3.50734	0.145554	0.511134	17.3763	7.92478
40.8	29.7542	29.7965	27.2719	-16.0591	27.2183	17.5841	32.0537	43.6272	26.3715	67.4846	24.7173	22.7351	19.272	5.02191	10.954	44.0444	29.0493	12.8603	31.3992	11.2519	12.896	4.26159	-3.05006	6.93977	15.2255	-4.28034	3.62277	-0.70527	11.4454	4.13777	10.4929	1.16259	1.22575	15.4361	6.29756
40.9	33.643	28.0827	26.6376	-15.284	28.0762	21.3569	31.494	45.4614	27.1306	68.4413	26.358	23.8599	20.1371	7.48001	9.5868	42.9637	25.1139	13.5304	25.7251	12.1158	13.2499	2.76694	-6.25661	1.02212	15.1683	-8.8221	6.71629	0.280934	11.8588	3.14466	7.48465	-1.81999	2.74412	15.1594	5.75173
41	30.5638	28.3444	27.7927	-13.01	26.6733	15.268	32.2097	43.7342	26.6737	67.8174	30.4654	19.9023	13.225	6.44404	9.00637	39.6677	29.2031	9.13823	29.6918	12.0869	10.9929	3.32926	-9.8679	4.14438	15.218	-9.57366	8.60112	-0.62311	8.74861	5.91319	6.11768	-2.20967	5.72419	16.0359	5.06697
41.1	33.2122	25.4007	24.5008	-7.53889	29.4095	15.9461	32.0277	43.6613	20.1316	65.4586	25.1018	24.2992	18.9702	8.25096	9.45801	40.1907	29.8722	8.71244	29.6548	20.7771	12.4722	9.31517	-3.39399	0.273385	11.6158	-10.6513	7.09197	3.45939	10.2909	1.79903	6.66955	-0.97285	-2.11253	16.2982	1.51731
41.2	30.0411	27.1269	28.3742	-5.79955	26.4903	19.742	32.1863	39.0826	20.4269	62.721	28.0133	30.5161	21.2696	9.19291	8.6117	41.9158	26.4743	16.428	31.0517	18.6749	12.93	2.92737	-8.16379	0.011316	15.1877	-3.87784	3.24933	1.76416	9.31756	-1.77397	7.05034	-2.20055	1.10594	12.1612	4.82267
41.3	31.2778	29.8424	25.2175	-11.8814	27.5095	16.3595	31.4653	43.4405	24.6261	64.2037	28.5638	27.8433	17.7524	7.91458	10.5019	43.0077	32.1791	10.9024	36.5661	14.4276	11.0662	9.03651	0.912198	4.50905	22.1009	1.6	6.46077	2.12679	11.0479	0.688881	1.3376	-1.22051	-0.32387	11.3473	3.51858
41.4	31.3923	28.9311	27.9758	-7.44654	26.7961	18.7597	27.9301	43.3087	24.7779	65.6682	28.1301	24.5387	17.2426	7.6346	12.0474	45.7062	32.267	11.2237	36.9482	13.6094	10.3267	-1.43015	-6.27144	5.65142	20.6377	-5.35255	12.0146	3.89768	6.68388	4.31627	9.17194	1.07789	-0.28556	12.8622	8.93535
41.5	26.5191	27.1513	26.246	2.92587	25.1088	19.3048	29.843	42.6747	27.1751	63.3056	23.5785	18.376	20.2443	7.42898	9.12803	42.1683	26.3249	12.4798	28.0513	14.0504	9.60796	9.70326	-5.43334	7.23003	16.3875	-5.82609	4.18677	-0.1962	10.1076	5.03346	6.46887	-2.23536	-1.28175	6.57155	4.93972
41.6	34.7171	27.3009	24.5665	2.26435	29.1079	14.8065	33.6545	40.5416	27.9312	64.8891	26.2678	21.1933	16.0372	7.66824	8.78887	40.2281	28.4766	11.6102	30.4438	13.0692	9.25594	9.45255	-1.68488	6.76331	17.1106	-6.35431	1.83603	3.29052	13.3078	5.75956	6.0691	0.810933	-0.66709	11.5961	7.15772
41.7	31.234	29.5982	25.303	1.8828	26.0246	18.4482	33.5249	42.2874	28.043	67.0594	25.2494	21.308	23.7252	7.94859	10.5033	45.468	32.3649	11.0642	29.494	13.7516	7.58266	3.20983	-0.82984	3.79461	19.4044	-7.53427	6.06706	7.17035	4.588	0.968577	5.01317	-1.75429	-0.2122	8.72586	5.90966
41.8	27.5607	25.4622	23.2787	3.33117	26.2043	17.631	31.4952	41.4142	22.3318	67.7254	25.0486	11.4048	19.7623	8.04244	12.5215	44.0744	31.4342	11.2986	27.2487	18.0046	4.58373	-2.36492	-8.70988	7.99407	20.2306	-6.04101	3.62685	4.8288	4.06116	2.99431	6.2854	-3.1215	0.692575	12.1052	4.01082
41.9	26.0331	27.1053	26.5224	2.95392	25.8171	17.4003	27.456	42.6214	21.9045	65.1581	24.233	20.2513	17.1604	7.43689	11.3036	38.355	30.0773	14.1335	22.7974	12.8892	19.4222	3.47981	-4.53258	7.32453	17.7974	-3.42305	7.64468	1.86414	11.3679	1.42368	6.84205	-1.35747	0.021243	14.1244	4.38415
42	27.5852	25.1752	21.6538	2.56591	24.3353	20.1033	29.0731	39.1972	25.4355	64.6814	27.1196	22.3758	18.8777	7.42895	12.4176	44.1582	32.2304	11.9172	22.434	17.9131	15.0852	3.48331	-7.17926	7.18843	20.2494	-3.51229	4.25994	2.91699	5.39082	4.95036	5.78267	-4.62276	-1.47929	17.9718	-1.05387
42.1	27.9156	25.5737	22.8097	0.27138	25.6688	19.5908	33.1372	41.1398	20.8741	63.438	25.6679	22.1669	22.3521	8.0344	8.90833	38.5775	29.1722	14.4818	18.8256	16.9984	10.8064	6.5822	-9.97936	5.91357	19.8461	-5.32423	9.06034	1.83344	5.14211	6.90483	4.18134	-7.70998	1.16048	14.8824	3.95912
42.2	28.1056	25.8516	23.3299	1.19171	25.2549	17.2807	33.7824	40.0214	24.5875	66.5595	25.9558	24.8272	19.4794	8.06498	9.67764	44.3048	30.5734	11.3752	29.5112	13.5514	8.69655	4.41902	-3.049	7.63156	21.2094	1.37873	3.77318	2.26922	10.1017	2.69477	5.72706	-6.46532	-0.33353	16.7716	3.72247
42.3	22.9123	26.9901	27.169	1.31681	25.2409	18.6749	32.3223	39.2388	20.501	62.4347	24.5944	24.5164	20.8515	6.785	14.3054	40.2811	27.7455	8.96075	29.1156	15.4043	12.5068	9.86252	2.02462	6.17375	19.9362	-2.35095	7.85983	2.63973	6.1481	1.32885	3.80097	-3.5666	0.036522	18.9393	4.37831
42.4	30.6351	27.4209	26.8158	1.96338	22.5753	19.1855	29.3072	42.6445	24.1579	64.0752	25.7844	28.4658	18.6767	8.0115	12.4396	43.2218	27.9884	13.1002	30.1457	17.4448	11.9525	3.44486	3.05748	10.2277	18.8421	-3.10529	2.50556	-1.30757	5.09773	3.01763	6.71825	-3.75465	-0.95286	15.4567	5.56798
42.5	30.6432	24.7119	27.9475	2.00182	26.4883	18.7021	29.9826	44.4844	19.0539	61.757	23.9478	27.9783	17.2051	7.38459	12.4666	48.9378	29.6403	11.3357	22.7371	15.1378	5.03459	3.11172	-2.82632	2.80416	15.3403	-10.1629	8.23755	6.76615	3.32825	2.55464	3.88511	-2.88235	0.2773	8.84452	8.26653
42.6	26.156	22.8631	23.464	1.58902	24.3112	17.5263	30.5801	37.7217	21.6503	62.3725	24.9294	23.9346	18.8086	5.86616	15.2343	37.7283	28.6835	11.536	30.3697	17.7216	10.1176	2.44314	-2.06918	5.67901	18.2857	-5.76727	9.38515	3.56126	6.85163	7.24182	4.7648	-0.61401	2.04525	14.1495	0.48689
42.7	28.1462	22.642	25.8544	2.25562	26.0316	16.792	26.1075	39.5269	19.4276	61.3751	26.2945	25.0236	18.0912	5.90141	9.75297	38.027	24.338	15.384	26.6627	13.4809	11.223	3.4486	1.68621	2.86406	19.9266	-8.18733	10.0127	2.38688	11.7475	4.90192	5.37481	2.62028	2.34282	12.9527	6.07313
42.8	31.2723	24.2524	25.325	1.96128	24.841	19.5737	25.7142	38.8504	24.9022	63.8351	24.6977	26.5	15.3508	5.21325	10.8363	49.7595	37.6621	11.9506	25.4754	14.7096	11.118	5.31131	1.43217	1.358	14.5235	-6.84624	9.88871	1.72048	2.82597	3.66421	7.72368	-4.1139	3.08248	12.9556	8.68343
42.9	26.4852	23.5615	27.5697	1.51128	25.1242	18.7547	24.3402	36.742	28.1281	63.8082	24.4594	23.661	23.8	6.88731	11.4369	42.5761	26.1004	10.1102	25.2321	16.613	14.6753	3.26455	-5.86562	1.12388	18.0983	-4.29398	2.7387	6.00074	1.56068	2.31529	6.10596	2.78809	-1.4679	14.5663	6.64678
43	30.4272	21.5254	25.1872	0.214775	26.373	17.5395	27.8305	40.1434	25.6733	63.5315	23.0216	28.3949	14.9126	5.3315	14.4214	35.4552	36.5721	11.2756	27.9798	15.0156	10.6686	7.98093	-2.12342	-3.84639	18.9674	-5.82043	13.2107	0.045986	3.6175	5.30442	7.36753	-1.01437	1.53154	15.1275	6.79953
43.1	30.4507	23.1871	26.9316	1.15644	23.2507	16.8502	28.4585	36.6696	14.4482	62.7435	22.2056	22.2548	17.8184	6.13593	15.0839	39.2701	32.0538	12.2987	25.0679	13.5687	10.0231	0.598902	-1.98013	4.86383	16.4499	-7.78362	2.80439	-2.95399	4.6329	-0.48993	5.37089	-1.45548	0.242193	15.0644	5.93466
43.2	28.1842	24.286	24.6329	2.00086	26.4701	19.3381	28.4457	39.0926	20.6658	63.3341	26.0931	21.4381	17.9658	8.14082	10.4739	45.2055	25.2511	13.6735	21.4264	14.1589	12.3409	2.40584	1.31079	6.68829	11.1715	-6.35805	3.42071	0.421711	2.88489	4.80972	1.69965	2.24934	0.050113	12.2145	8.69377
43.3	20.5978	21.4876	24.7771	2.52362	27.4353	16.161	24.0685	36.5994	18.1227	62.8747	22.7864	25.4315	13.0144	4.87777	15.5438	39.3428	22.6158	10.6932	27.7966	15.5531	17.7576	5.45485	3.224	8.75425	18.1231	-9.89794	11.0174	1.3937	6.39698	4.94833	2.44574	-2.6591	-3.54157	8.87946	5.24687
43.4	28.3307	25.0364	25.1666	3.73445	26.4147	17.0033	27.703	35.5706	19.2307	62.6295	24.7059	27.0299	19.0937	5.67018	12.4253	41.922	27.2563	11.2842	16.7712	13.4547	10.1297	5.51905	-0.83951	-0.07972	14.4558	-5.4169	4.4589	2.12131	2.64185	7.51991	4.2844	0.223935	-0.1385	8.83978	7.32194
43.5	20.0366	23.7773	23.8908	0.268727	24.5956	16.4666	25.9217	35.1255	20.9273	61.3812	24.8617	20.9113	12.5062	7.05771	13.6984	43.0685	34.0177	13.8419	20.0676	13.8544	6.70944	6.82167	4.96659	5.16725	16.4841	-9.39911	3.56535	6.86414	3.81413	5.80628	-1.49544	-5.12099	-1.5383	13.9778	7.69996
43.6	28.0827	22.2929	24.9621	3.57757	22.8141	20.5528	27.8876	34.7449	12.5377	62.6143	24.6152	26.4427	15.1876	7.24831	12.918	36.6152	32.617	12.4685	26.025	14.363	10.8338	7.11867	-0.592	11.6648	13.0437	-6.63339	15.4971	2.76908	4.09056	-3.19716	1.93078	-5.97741	-0.22924	14.4459	6.26151
43.7	25.4326	23.2469	22.1853	1.77723	23.3406	20.3828	27.9743	35.3019	18.0975	61.9293	22.1388	16.7727	18.948	6.42871	9.77253	41.0112	29.7744	5.89814	20.5497	12.2139	15.082	12.7177	2.83446	3.77292	14.5863	-4.73504	5.38698	-0.15635	3.61829	5.43829	3.13867	-3.35638	4.73113	13.866	7.70679
43.8	25.576	23.7557	26.1988	0.954341	24.6603	18.5335	26.8701	34.4651	18.1809	61.2886	24.812	23.202	14.6827	5.43828	12.0489	34.7817	24.9916	12.1768	21.8249	15.5063	13.7364	-0.14723	-2.92133	1.70917	22.9751	-8.38143	9.04241	2.01256	9.29834	1.65311	3.69559	-4.97412	-3.00136	12.7419	9.83426
43.9	26.6261	23.5588	25.8653	1.57888	21.721	18.6253	25.5788	37.1679	16.5826	60.8791	23.3595	27.1083	15.9308	6.65364	10.383	42.179	22.9725	13.1122	24.3793	14.2992	14.7182	7.81377	-5.3198	9.06452	14.9173	-7.89113	6.03799	3.94049	5.55669	2.06845	0.94533	-2.10124	-1.64243	18.0575	4.30098
44	26.0487	22.8903	24.3001	0.778416	23.0145	17.6896	23.0584	35.9628	13.9976	60.6829	22.4514	29.3465	15.2498	6.94822	12.6689	44.9422	28.4911	12.0821	20.1138	14.8442	14.3536	-0.6802	-1.24519	2.10289	14.2581	-4.28025	6.83571	7.49151	10.7326	9.86382	1.07314	-4.60645	0.439707	16.5827	11.6481
44.1	28.6531	20.6082	25.542	0.716338	22.994	19.0132	24.4542	39.2199	13.9724	59.3309	24.4941	28.4494	14.0195	6.14002	11.2403	44.2448	18.3389	10.1105	21.1645	16.6524	10.9764	2.43638	-1.79044	2.14377	19.3847	1.15397	1.68352	0.216767	9.94168	1.35844	9.43671	-0.98397	-2.9191	15.258	5.02349
44.2	26.6566	22.365	22.878	1.29434	22.1909	17.6741	24.6737	38.5426	24.1537	59.824	25.3944	33.6625	13.3672	7.67464	9.37496	40.956	25.6345	7.14457	18.4939	18.7793	10.1697	5.55797	5.28977	1.30747	16.6426	1.13177	6.88316	3.04384	3.922	-0.33608	5.43904	-3.31158	-0.59926	11.7709	5.3877
44.3	27.6535	19.3287	24.6332	1.22586	25.4616	12.9337	24.9361	30.2106	22.5218	60.8783	24.9814	30.2867	15.2048	5.424	10.7063	40.0023	21.2485	9.26414	17.83	14.2236	12.9106	9.48305	6.81762	1.35656	12.1676	1.64242	4.5087	5.39799	6.77153	3.42819	2.2998	0.866696	-0.67077	14.1612	8.42457
44.4	22.9538	21.6507	25.7031	1.77277	21.6395	19.6443	24.1297	35.7543	22.8815	60.5845	24.6626	21.6873	9.99718	5.8357	10.7786	38.6661	24.0661	11.1348	15.6788	14.0957	14.3424	4.21806	5.18317	1.81836	11.9984	1.20747	8.45045	4.44308	8.36251	5.25208	4.73206	1.16394	-0.20835	16.4313	10.3931
44.5	32.9673	20.7432	24.1174	0.316409	24.5996	15.9562	26.8867	34.9411	21.1712	61.1513	22.5238	20.2554	18.4016	5.06955	13.1796	37.72	26.6709	9.41408	14.3672	13.2496	11.3034	5.5881	7.83172	3.67665	16.17	1.04528	7.14483	3.16373	7.14305	10.4059	9.5608	-2.51739	-0.66793	8.56489	5.85909
44.6	27.3102	21.3999	25.2988	-1.58035	24.219	15.9556	26.6635	35.9201	21.1949	57.8047	25.8778	22.0988	17.8017	6.59601	12.3213	36.9938	23.2629	8.86988	21.0306	14.7319	10.4624	2.12732	3.75711	2.85184	14.4856	-2.86447	10.6909	2.87248	9.67311	6.01408	-3.89344	-2.58555	-4.4439	12.2006	7.74261
44.7	32.852	18.7074	23.6502	2.1129	23.3569	14.8086	27.583	36.7016	20.2513	57.924	25.2282	25.3415	15.8027	6.48177	7.36108	38.056	28.5816	7.24676	24.8754	15.7228	13.0708	-1.4983	4.87888	-1.35046	17.273	-2.1609	7.01959	2.66359	5.01489	-1.82683	1.07917	-6.36028	-2.80356	13.112	8.50951
44.8	30.6801	20.6679	24.8988	1.46124	23.3287	14.8743	23.9463	39.2553	18.1519	60.9953	22.6371	26.5747	12.0127	6.6544	12.2188	37.7352	18.5524	7.70757	26.4769	11.9246	11.7464	-1.2431	8.56192	4.26088	19.2508	2.24387	4.43177	0.595205	4.25199	2.96114	5.52079	-4.82812	-2.25718	21.4115	6.72472
44.9	28.5729	19.2049	21.0455	2.47211	21.6852	12.8752	26.3138	39.9406	19.5936	56.8743	22.4498	23.9989	16.8	6.06327	11.7133	31.4814	24.372	10.5565	33.0593	15.2557	11.2406	6.36229	9.10151	5.08524	18.6133	3.05688	5.51898	2.08884	4.77126	-0.16661	2.74537	-9.95886	-0.73667	19.0566	9.21854
45	27.7466	20.4084	22.6776	1.7685	21.0339	11.9274	26.8572	34.7379	21.0149	60.3881	23.1687	21.7183	11.104	6.23513	15.4178	37.3259	26.8558	11.3632	35.6478	15.1563	13.3448	-5.26998	4.6668	5.87831	15.3249	-7.75505	6.30915	0.488849	5.7522	4.18677	10.4172	-7.92417	1.76667	16.8991	3.57844
45.1	22.8053	21.3633	22.1942	1.0616	21.7206	13.8305	29.3558	36.7283	21.8542	57.641	23.2736	21.6528	15.5649	5.50265	11.9818	37.8369	20.1845	11.6282	34.2664	13.2984	15.6514	-2.57461	1.15073	3.62849	15.583	-12.4946	6.18078	-1.76145	9.37403	3.47683	7.80657	-4.96511	-0.25947	15.7197	6.81989
45.2	22.6627	21.2181	22.2842	0.78251	22.0567	14.5413	26.8512	40.0824	18.078	59.0713	20.0562	23.7334	13.0629	5.10198	14.2409	32.0763	27.5925	11.9966	35.3483	12.8874	17.933	5.54989	0.259884	8.09902	7.20401	-14.9017	7.41447	3.40288	5.55084	6.67406	3.83259	-7.75891	-1.21157	16.4515	6.15503
45.3	22.5104	19.4664	25.4855	1.17828	20.755	14.929	30.1901	35.6761	19.2667	60.0496	21.1444	28.0754	22.158	3.30127	15.8447	39.6878	27.0409	9.69871	28.9603	13.0194	11.7518	2.6131	1.25068	3.24225	18.7917	-18.2442	10.4533	-0.71582	7.11819	2.30719	7.66814	-6.11803	-0.86001	20.2157	4.5075
45.4	29.6188	17.0894	23.1193	-0.93035	21.5568	18.4447	25.7279	38.6194	21.7589	59.3456	22.8515	29.8519	13.4599	6.42085	11.9015	30.1732	24.4655	10.7393	38.1557	13.8704	15.0305	6.50325	1.7608	0.83994	15.8286	-8.88788	9.32411	0.048648	11.308	5.90211	6.72983	-6.22967	-1.65936	18.7322	7.1342
45.5	26.8156	19.253	23.4741	0.841676	20.3021	16.5717	26.2967	38.2492	22.4187	56.5652	20.8881	21.4258	15.9545	6.70073	14.567	35.5859	25.3389	12.149	37.2381	7.88603	13.3981	1.68875	4.50193	-0.88305	15.462	-12.7729	7.6677	3.58345	5.08503	5.97088	7.38326	-6.89526	2.56257	20.5466	8.4785
45.6	21.5801	17.6585	20.8273	-0.33013	19.6497	16.3288	24.7191	41.4107	21.1956	57.7782	23.7071	20.7941	10.0607	4.21503	11.4677	38.3207	21.6658	10.7473	34.3903	12.7135	15.827	-1.00238	4.70717	5.94785	10.3575	-14.6463	6.60456	1.66299	12.2907	6.81141	4.69978	-5.3945	-0.8453	20.1605	7.5133
45.7	28.0173	20.8254	23.0864	0.725018	18.3101	19.099	27.465	39.431	14.5966	59.008	21.5048	21.016	14.4405	5.92597	13.6559	33.6185	29.747	8.86689	32.1013	12.4877	14.2274	4.23495	-1.9145	5.42283	14.5191	-10.3897	8.77614	2.39199	6.85111	5.39852	-0.677801	-7.95308	-3.99966	18.2103	6.15266
45.8	26.6814	19.0707	21.4365	-0.3185	18.0656	10.6438	24.562	36.2861	17.9181	60.1781	20.1233	21.3903	11.7651	7.35412	14.0613	31.5159	27.5369	10.698	35.0285	12.1616	16.4066	2.85331	-0.70602	2.90412	13.4421	-10.1958	6.17389	3.76408	11.8541	1.4736	-5.5775	-11.206	-5.37321	15.6697	5.93329
45.9	29.7832	21.8945	22.4846	1.83334	17.1465	17.2954	23.4755	35.308	16.0043	59.5264	21.0385	20.0523	16.3749	5.32431	14.0105	33.3582	27.1005	10.5591	38.7145	12.8395	15.6412	1.95146	0.192069	4.21547	13.4388	-10.9148	3.12602	1.99056	11.1606	3.71715	1.23171	-7.95177	1.30903	16.5092	5.40416
46	21.5625	17.7737	23.164	2.63762	20.5557	17.3201	23.4385	35.5216	20.1128	56.8599	20.7847	28.0797	11.6123	6.01801	14.0828	31.8616	22.4044	11.9297	42.7937	12.1854	14.6871	0.593152	1.68142	2.42588	12.3568	-12.1428	13.097	2.89396	15.9149	2.81297	9.30904	-2.06958	-0.74812	16.3809	8.34962
46.1	26.6813	20.7481	21.9903	0.845025	17.1414	16.8427	23.665	35.1203	16.0985	56.6159	20.6575	23.5578	8.40447	5.54325	12.7304	40.3878	21.8192	11.2901	44.416	14.0767	11.1368	0.057475	2.86029	5.9017	14.5555	-15.3792	5.7597	2.78246	10.9205	4.32923	-4.34088	-6.4427	-1.60502	21.2444	5.89556
46.2	25.2298	19.1782	23.7091	1.06151	18.4286	20.6892	25.7372	34.7807	23.5748	54.5181	22.3768	24.7929	18.4426	5.47183	12.4503	33.6473	21.9408	14.2776	42.1275	12.3678	7.11092	5.34955	3.43958	4.59646	12.5848	-13.3555	9.51359	2.3765	12.7573	2.42585	-3.56308	-7.30478	-1.5913	20.7021	8.43104
46.3	25.2173	19.6063	22.3741	0.103673	20.7909	13.7764	26.1856	35.1908	17.9028	51.6984	20.0798	13.3285	13.5302	7.18148	11.0944	34.3188	27.4391	12.439	44.0486	11.2508	12.8432	4.9823	1.28354	2.44398	20.7403	-14.6921	8.12501	3.98636	12.9611	5.23458	-3.70259	-8.35722	1.38838	14.9293	7.93882
46.4	25.255	18.0641	19.9613	2.16682	19.8051	20.7041	25.7973	31.3247	20.403	48.996	21.2403	20.9802	15.0122	6.47703	7.91579	35.7852	19.6022	8.94796	37.1234	11.9498	15.9087	2.25265	-4.19354	10.9051	12.441	-7.14998	8.87102	4.71495	12.4261	5.13922	1.14279	-10.7261	-0.60433	17.4391	7.66802
46.5	22.1026	21.1783	20.3886	0.979886	19.1804	13.4777	25.5457	38.2492	23.0016	46.1794	21.664	24.2386	15.5954	4.66217	12.1258	35.6451	23.9112	8.83632	38.9519	15.0276	21.041	9.6177	2.85191	4.89282	13.7427	-1.81443	-0.05929	1.2423	4.11238	6.69887	6.04611	-6.85951	-1.75043	21.5169	2.24536
46.6	24.5383	19.3145	20.3447	-1.54278	18.7718	15.7437	27.6245	34.7484	25.2437	50.5897	23.675	20.7037	14.9879	5.83159	9.38865	29.9362	25.9551	11.4519	38.6184	15.5116	17.6075	0.223301	6.31712	3.64254	9.10248	-3.71109	9.36478	2.42804	3.83513	6.71067	8.66579	-8.53933	-2.56836	20.271	3.90279
46.7	26.9927	20.7854	18.8182	-0.49564	21.9783	13.2573	23.2397	34.8321	24.9779	48.8918	17.5898	25.477	8.64677	6.63416	9.36389	37.1441	17.5572	10.4565	35.248	15.7081	12.647	0.053269	-2.35795	4.31331	16.3321	-15.2969	1.72045	4.49676	10.5169	3.19787	4.16056	-6.8819	-0.15973	15.779	4.49715
46.8	24.9822	18.7423	20.5131	0.649957	19.9047	12.8061	23.8708	33.4373	20.7915	50.3822	19.5053	32.2127	12.9152	5.80913	10.1499	35.8848	22.9955	9.27279	37.7913	15.6872	19.0054	4.51979	3.60872	4.29907	11.0099	-10.7984	9.77132	0.369709	5.31114	0.996832	1.81527	-2.7264	-4.7075	19.8268	3.0298
46.9	26.102	18.5324	17.6982	-1.35548	20.6001	13.8629	25.1789	35.482	21.3442	49.4076	19.5665	23.5053	14.1764	6.29671	10.264	29.4081	19.6885	10.5728	44.2091	14.3068	16.6656	-1.59364	4.52883	7.65117	15.8335	-5.6048	2.86011	1.3516	7.04793	0.661005	2.66475	-4.67338	-2.64555	23.268	5.03261
47	28.5226	16.9988	21.5293	-0.27666	19.8634	19.967	24.0193	33.9424	21.0529	50.3037	18.7017	22.3758	12.1813	6.1169	6.45183	34.133	20.3642	5.69209	37.3905	14.5298	15.1426	1.02523	1.22593	5.07176	16.4211	-4.87452	8.40628	2.30262	10.6903	3.68378	6.82649	-3.5825	-3.55567	16.0842	3.56302
47.1	28.5942	17.7931	20.1341	1.31437	21.6429	17.4987	25.4447	30.8773	21.6481	48.7268	20.8122	24.1227	14.5235	7.04602	10.1027	33.9423	25.8385	11.6648	27.2081	17.7999	14.4643	-0.02788	6.11234	3.48568	13.7846	-6.93156	8.64015	3.8632	6.60719	4.04537	10.18	-7.43615	-1.45635	15.8639	4.95334
47.2	23.85	16.1637	23.6706	-0.21695	18.7931	14.7795	25.4984	33.8297	23.3393	50.1205	21.4199	22.3445	16.7484	6.74013	9.4383	35.1153	22.0679	11.7348	35.8425	13.0549	12.1927	0.914372	2.73188	1.72921	14.5974	-9.91305	9.94681	4.40948	10.347	2.18262	7.09142	-14.9283	-6.5401	15.5107	6.64364
47.3	23.9167	17.1719	21.2656	1.18163	19.8715	14.811	24.7108	34.6224	18.7578	47.6859	18.2844	32.8745	11.1265	4.87511	10.5675	35.631	20.3236	9.16955	34.1469	17.1591	19.8421	4.13001	1.66114	5.86642	17.6323	-5.20977	5.62675	4.09991	7.62658	4.67429	4.10659	-9.84314	-1.08778	15.0653	6.7123
47.4	27.0106	17.834	18.7616	0.072381	19.7595	15.0681	24.6117	34.2215	22.5924	51.0511	21.0052	24.3517	15.5595	5.6849	11.7236	36.8128	18.7111	6.60039	33.9491	15.8022	17.478	2.8055	4.04919	4.1639	16.0825	-9.35349	4.6753	3.05737	19.3211	3.55902	2.53758	-6.12357	-1.51117	16.8136	6.45364
47.5	23.5051	16.2636	19.3684	0.525154	19.2613	15.0305	21.4706	31.4127	17.235	47.3165	16.8532	25.2267	9.43388	5.94146	13.8745	39.5264	22.2439	7.51531	31.1565	12.5118	16.2243	2.26513	0.994065	5.75726	16.2078	-12.3847	1.46778	2.32619	5.98118	5.68797	-7.70084	-6.21144	-0.50428	14.1499	10.0714
47.6	20.1597	20.2272	20.1817	-0.31367	19.8939	11.9064	23.0368	34.615	18.2738	52.2869	14.6166	25.8675	13.3938	6.65756	6.71297	34.0568	16.2206	12.6439	34.9262	9.72917	12.9036	0.441777	3.43874	-1.55599	21.2066	-8.2642	4.98333	1.30377	6.40269	4.2465	3.26257	-1.71292	-3.94052	16.2608	7.96585
47.7	26.6597	18.6284	20.1059	1.29673	18.2909	11.9079	23.7509	30.006	20.0833	49.0652	20.2366	20.6201	14.0692	4.99701	9.41609	39.255	18.1062	9.45454	29.0659	11.6001	15.1329	1.98757	9.54983	6.20494	13.0174	-4.7519	8.99762	5.07305	3.29438	1.99112	-4.62403	-6.43727	-1.47578	14.4808	5.7884
47.8	22.7478	16.5848	21.0058	-0.10961	20.4911	15.9156	22.8991	33.6155	22.6929	50.6863	18.5029	23.2952	10.1063	4.62197	11.5262	34.205	16.5946	8.85385	33.0614	16.2427	13.5226	5.71581	2.40376	5.99388	19.5378	-7.06634	8.05454	4.08116	4.86524	1.21213	3.08891	-5.98184	-4.61919	12.1901	7.04712
47.9	25.2169	17.4033	21.9407	-0.81743	18.7561	17.3846	26.4197	32.8063	20.3586	48.5312	19.6229	16.2607	11.735	4.41281	8.20278	38.1824	23.376	8.413	33.325	10.4935	14.7464	-4.57416	0.503875	2.09961	13.3455	-9.87643	6.63207	-0.51423	9.25718	1.47468	10.3335	-3.78846	-4.39027	21.5724	6.18887
48	23.6517	15.3774	20.6565	0.488048	18.2301	14.7008	26.7547	32.0392	27.594	53.1135	18.8017	16.0868	9.25241	5.00752	10.1414	41.7162	18.8104	9.06984	30.2399	13.5388	13.6666	5.92236	-11.1865	2.1546	17.6565	-8.00098	10.5251	5.82292	7.03039	4.37087	-9.54416	-8.79557	-5.39175	11.8189	7.80244
48.1	22.5372	19.3669	20.5348	0.711233	19.3529	16.2077	24.4346	34.9627	18.6026	48.935	20.9505	17.1374	8.32268	4.98547	6.38594	35.4902	16.3684	9.11535	34.5293	11.7124	8.53777	-3.14408	9.35063	7.22193	13.405	-6.94138	4.90712	5.30501	6.71686	0.302506	-12.5609	-3.6565	-6.50442	6.85124	3.51815
48.2	20.3256	16.6854	19.5828	0.051743	16.7861	13.8816	22.6759	36.1158	18.5293	49.916	19.1563	27.3807	15.6577	5.46842	10.1368	41.0536	19.433	11.9481	36.3001	9.46534	13.1258	-2.27067	2.24181	-0.75668	17.9715	-9.64398	3.83565	3.27384	8.44658	2.79586	6.25847	-6.86326	-4.26399	16.3877	10.9985
48.3	22.9636	17.3286	22.6204	-0.42663	17.4315	18.1419	23.2603	36.5171	21.4717	46.6703	15.8081	18.7567	12.6085	5.07051	11.1889	37.7745	18.6312	7.02492	33.436	15.0639	11.469	10.3563	0.975772	5.68566	12.554	-12.5619	7.97487	3.1602	6.01358	3.23199	10.7813	-8.54062	-6.25433	16.0478	6.81727
48.4	23.3498	17.6099	19.4266	0.487196	21.0047	13.9368	23.6289	33.7829	20.0384	47.4645	20.44	14.6603	7.4707	5.02551	12.0081	31.8315	13.1795	7.93642	29.9071	15.2282	11.7213	1.05324	-1.02343	3.07806	24.496	-4.17188	4.88251	4.51455	3.52598	2.55288	6.63685	-10.6431	-5.06804	13.2401	5.70487
48.5	23.3606	14.5214	24.4609	0.446124	18.4277	12.8188	22.4706	34.3143	20.9621	49.3053	20.3681	14.8909	6.79301	5.6041	11.9361	35.706	14.9686	10.6693	31.658	14.6133	11.5212	1.79925	4.79876	0.83597	16.2797	-8.09622	3.67101	4.57204	5.20492	2.10651	11.3262	-10.1643	-3.52938	10.3527	7.41183
48.6	25.5465	13.7059	19.9245	-0.2569	19.6513	14.2755	23.2263	27.4337	23.1087	49.6071	20.8044	20.2492	9.3124	3.86581	14.1615	34.4854	16.3646	9.33966	31.545	12.5991	8.92742	1.95238	7.86244	3.5185	13.2568	-9.54627	6.6302	1.14493	13.1197	2.93841	14.4746	-7.23957	-0.71842	16.7842	8.08446
48.7	21.7958	15.5135	18.0026	1.20406	19.4737	12.0171	22.8137	31.1315	28.7082	45.9605	19.8162	23.1609	7.28371	5.18578	13.5602	34.6537	19.5581	9.77738	30.2667	10.8286	9.25501	6.37699	3.01341	1.46218	14.9292	-3.97813	6.04218	4.70656	7.45483	-3.53614	13.2885	-12.0276	-4.22318	9.00952	3.42992
48.8	24.7022	14.7777	19.797	0.504228	17.9461	16.0889	22.0105	29.866	24.3854	46.9857	18.5431	18.4166	13.9509	4.36972	9.04744	29.5513	19.4575	8.86394	30.2075	13.8711	11.5147	11.193	2.66854	6.97327	10.4494	-3.6851	5.9012	5.58453	2.26089	0.015532	1.20334	-11.6152	-4.43407	8.23986	7.19579
48.9	19.975	13.4139	21.1133	-0.85184	17.9585	9.3286	20.6242	27.4874	16.9366	49.4994	20.3222	14.0543	12.1842	4.98453	11.5446	35.3266	16.6333	10.8941	29.9503	13.4217	8.82797	3.06836	10.1887	2.43131	12.4666	-7.87118	10.2544	12.1348	3.73128	1.68115	11.1177	-0.95249	-3.97214	8.03124	9.69051
49	24.4459	13.7347	18.2985	-0.80357	18.0845	13.8542	17.6331	29.797	21.2272	45.291	20.6978	22.5413	7.77182	5.98059	8.65799	32.0247	15.1064	8.69241	24.7815	10.1203	5.90829	-1.71842	-1.57458	5.03161	19.7252	-7.88564	8.84111	9.18453	3.11658	4.29568	8.5917	-9.0733	-2.93414	10.0167	9.41846
49.1	17.4529	17.9338	22.3667	0.463665	18.6775	13.5379	22.3004	31.6251	21.9496	47.1339	20.1705	17.2977	9.38336	6.58486	13.8738	35.1932	17.2523	10.4675	27.272	13.2253	12.5186	1.38701	6.8411	4.23588	13.135	-7.21368	4.24769	-0.29851	14.5241	-2.76584	13.9996	-9.75599	-6.24686	14.4395	8.38499
49.2	21.9699	16.6793	16.5102	0.556201	18.9215	9.08007	19.7309	30.7963	23.8271	47.9867	18.4811	18.9727	6.54676	5.24955	12.3096	35.2297	20.1151	10.8308	30.7381	12.9705	4.31348	-2.09021	7.70122	3.0292	12.68	-4.37418	5.12902	3.57831	5.77217	0.604676	15.0759	-10.2789	-2.98895	7.25215	13.5596
49.3	23.7762	13.8015	18.0312	-0.78242	13.887	11.9965	21.0129	33.0222	20.0645	44.5301	22.7951	24.6626	9.48895	6.25069	12.0472	33.1615	22.2435	10.5435	28.16	11.9175	10.9148	1.43012	5.79257	0.020085	12.1504	-4.93779	4.09577	3.56483	11.116	1.19184	11.2734	-9.47569	-4.8528	15.0161	12.5733
49.4	23.2647	14.3251	19.0009	-0.56266	15.1903	8.86531	22.1857	31.9382	23.7431	46.4159	18.6194	19.0837	0.651826	5.62663	13.5843	31.4445	19.4964	10.5791	28.236	10.3573	9.75788	3.90856	1.9183	3.78236	13.9619	-4.59199	5.10283	5.74042	6.1557	0.881315	9.70508	-13.8802	-6.71349	15.5212	9.95809
49.5	19.5299	13.95	22.4976	-0.43226	14.5656	10.5731	21.7999	29.89	23.6549	47.94	19.7052	19.7052	13.4625	3.49918	10.7871	29.339	20.0714	8.8318	27.4813	11.0751	10.3899	-3.47273	0.637603	2.07799	15.9426	-5.85973	6.2292	5.72577	3.62055	1.37438	8.80206	-6.98107	-2.6777	18.2445	10.9901
49.6	21.632	17.2566	21.2134	-0.42246	16.8696	11.8206	23.7347	33.297	17.3127	48.6807	21.3936	18.9223	8.93851	4.76488	11.652	31.1096	22.4895	10.3941	28.5912	10.3594	11.367	-3.58229	-3.34195	-1.02098	11.6378	-2.66217	-0.10532	8.68288	8.20691	2.98798	11.8044	-9.24914	-0.97823	14.5177	7.17045
49.7	22.9031	14.7772	18.8528	-1.2564	14.1199	9.77805	23.1166	27.4996	26.5261	50.2402	18.2814	24.5815	9.53158	5.96438	8.91466	33.9624	14.4154	8.05445	22.6374	10.5766	9.82536	-3.1646	-2.98343	8.86872	16.6748	-7.07941	5.46978	10.758	4.95626	-0.58197	11.2662	-8.2667	-3.61838	20.4326	10.6163
49.8	23.1927	15.5642	12.0818	-0.66749	14.2594	12.737	22.9981	28.0741	20.9	46.1292	19.2469	31.2614	5.19429	5.0693	8.42266	37.0937	19.5159	7.0522	27.5047	15.2625	7.0204	3.27384	-2.11617	4.44864	7.30876	-8.21616	6.46206	4.24293	6.36654	7.41084	5.87278	-8.89479	-5.58424	15.155	10.1639
49.9	22.6893	14.8963	18.869	-1.60195	13.9176	12.4663	24.5577	28.1056	20.6149	48.6343	20.7788	22.1509	6.56868	5.22518	12.0213	26.5953	23.8669	7.94632	30.4177	11.8138	7.25009	11.0048	-4.76094	1.43947	9.95529	-7.67567	6.84733	4.16207	5.21642	2.14993	8.16585	-8.57562	-2.95726	13.8676	10.3524
50	22.7513	13.8321	18.1859	-0.51972	16.9005	7.54753	22.2152	29.4676	19.949	44.7207	16.5974	19.5096	11.3256	4.95038	13.9907	31.7783	17.3113	9.04743	22.3409	13.2056	7.44524	3.47553	-1.84081	2.34972	13.387	-7.03825	2.23477	3.75284	6.56158	2.04323	6.68798	-12.8461	-3.69822	23.6508	8.94416
50.1	17.7015	15.2672	20.1485	-1.26376	15.229	7.42075	24.7189	24.1807	20.0693	46.1136	18.5203	18.1214	10.0833	4.74138	11.7423	31.4443	20.5638	9.9223	33.5054	11.4041	12.5723	1.86183	-5.42366	1.61522	5.26316	-2.73257	6.70343	0.439858	6.8955	3.41927	14.3239	-6.41257	-5.13225	18.6805	10.9982
50.2	22.9419	14.1979	15.4449	-0.91015	13.7402	9.60339	23.6458	28.3726	22.6568	46.8291	16.9192	14.1552	10.724	3.59544	13.0256	36.0599	19.6437	10.2626	24.4949	11.9368	6.05075	-1.00409	-0.82699	5.49511	15.2812	-8.41817	7.72144	2.52458	3.07156	2.40495	7.22556	-8.69993	-8.43764	17.641	9.01312
50.3	17.9039	13.9218	19.1195	-0.79107	13.7304	8.17842	22.1631	29.7736	18.1629	47.1989	17.5062	17.2479	12.4305	6.54478	9.70754	31.3337	22.3122	6.16338	24.3845	10.3201	5.38186	-0.3382	2.98714	-0.50654	12.2573	-7.76268	4.35967	2.41349	4.3193	0.466028	11.0588	-9.82656	-4.44773	18.4106	8.50591
50.4	19.7639	12.7109	17.3227	-0.55754	14.2374	10.0072	21.427	26.831	20.0419	44.6985	19.1675	13.5336	4.57051	5.95549	12.62	36.7556	26.5255	6.74229	22.0285	13.0573	8.23493	3.78648	8.55865	-0.5995	13.5118	-7.48132	5.28148	4.8868	6.12542	0.557658	8.79861	-9.03965	-5.40107	19.69	6.33929
50.5	17.8186	15.1876	20.4245	-1.20019	13.8383	7.71348	22.5475	33.614	21.9022	46.4474	18.8749	15.4949	4.21071	5.9735	9.58395	33.4342	23.1235	8.60231	22.7644	10.8514	8.32966	7.94181	1.76079	-2.71854	12.1905	-10.1485	4.7217	0.163486	7.20261	1.06101	14.4495	-10.3937	-3.19465	20.1458	11.588
50.6	21.1992	16.9031	16.7053	0.207112	12.5407	9.94461	21.8392	26.7316	17.2893	47.5844	17.5194	20.1304	13.9636	5.93158	14.6741	28.7293	24.6199	7.97329	25.8287	10.0026	8.90336	9.86541	-5.99903	2.02503	7.66088	-4.7671	8.16754	0.019034	10.9252	1.49893	12.3902	-10.9949	-5.0704	15.9445	10.8044
50.7	19.5793	16.5099	18.6595	-1.22215	14.405	11.0716	20.9965	25.7818	17.2521	45.8015	18.5329	17.057	6.37241	5.80659	12.1107	32.1972	28.2047	8.18162	22.8021	13.0425	11.9826	4.35038	-5.85535	0.511037	19.1237	-10.4261	9.28457	1.28221	5.79805	0.96	14.0676	-12.3875	-4.76731	14.5615	12.9588
50.8	17.0528	13.5281	17.6254	0.453115	10.4311	11.7622	19.557	27.1175	17.1432	44.1956	13.8224	22.6346	2.52427	5.92201	10.2823	29.9476	24.2312	7.40427	21.6417	8.20022	2.4109	8.28099	-2.19831	9.17141	10.6013	-7.17702	-0.83739	0.004681	10.9153	-1.79914	9.72709	-12.1027	-5.74803	14.9983	11.3726
50.9	18.9993	13.7878	24.0157	-0.06728	13.0613	10.9477	20.6646	25.285	14.5427	43.3148	15.9223	21.411	11.2619	3.33805	11.2422	29.3494	22.6086	9.00237	19.7208	17.8128	9.92204	4.02881	-1.6442	0.046237	16.364	-4.35175	3.05561	-1.49433	8.61742	-0.46865	13.4545	-9.54065	-2.83976	20.5266	12.4446
51	19.4863	14.8639	17.2899	-0.15262	13.4777	12.0798	21.2102	21.1185	18.9352	43.725	14.8755	18.7535	8.42244	5.41877	10.2559	34.2314	24.9874	2.2759	20.1207	11.3808	9.43188	2.5164	1.87054	0.996145	12.941	-7.01029	-0.16353	-0.08312	3.5249	0.845991	12.0499	-8.73236	-4.7118	23.0873	12.8228
51.1	21.6748	13.2892	14.7254	-0.22866	11.5451	11.8466	20.5866	19.9501	19.1062	46.0934	10.8984	18.2023	7.74083	5.60533	12.6766	31.9349	25.5268	6.74116	22.8868	14.4284	7.35964	1.51969	8.27373	4.359	13.9835	-2.66699	4.28604	-0.35933	9.75442	-0.94397	9.75765	-7.82807	-4.46333	20.4466	8.54091
51.2	20.7326	16.0521	19.7189	0.116955	13.7446	13.5522	22.6223	21.9484	16.2801	43.6157	11.8178	20.5199	10.808	6.79732	10.4607	26.9689	25.6506	8.34503	23.2969	10.6849	13.8192	5.32396	2.21338	4.19391	12.5245	-7.41252	3.48312	1.604	10.4527	2.45088	12.0913	-7.49872	-3.88611	22.6716	6.56593
51.3	17.1338	13.3803	16.9575	-2.2678	13.4382	14.2409	22.2908	23.2477	20.7969	47.384	15.064	20.3787	2.59511	7.18377	10.5543	33.6334	30.4582	4.37406	26.389	11.8641	8.63126	-1.18005	-2.16689	-1.45843	14.5361	-8.15335	1.20636	-0.61118	10.6779	1.80556	5.15169	-9.09011	-1.38525	18.0454	10.2906
51.4	19.5917	16.0293	13.4698	-1.61484	15.2854	15.7068	25.16	29.1474	20.5709	44.0825	12.8767	21.7332	6.02781	7.11295	10.9903	29.8825	31.0805	6.21657	27.9593	14.0163	14.7353	0.324784	0.444049	4.91956	6.33332	-8.80108	1.06754	4.43657	11.3655	-6.18756	12.5537	-14.3796	-1.34962	18.7343	11.195
51.5	18.896	15.6819	18.995	-1.1519	14.6297	12.6606	22.1979	26.8336	20.5008	43.3751	12.227	18.7625	2.1163	5.97314	11.3765	32.5134	16.1017	7.60995	14.2842	10.6505	11.9101	-1.1714	2.86567	0.994022	15.7849	-9.18543	2.19929	-1.53996	0.043042	-2.92626	9.79709	-8.4133	-1.4716	18.7625	13.7014
51.6	20.4245	13.8849	17.0675	0.338513	13.6135	9.54053	20.7139	27.0174	19.8719	47.2337	13.263	20.0938	3.76039	6.37358	10.6735	30.025	22.499	7.26387	26.0103	9.36544	9.43374	1.58553	4.34772	3.86345	11.4942	-13.4771	-0.13782	1.70363	10.8167	4.79193	8.93996	-10.4772	-4.63938	18.2343	11.3479
51.7	20.3553	11.8669	14.601	-0.88026	13.1927	11.2117	19.6296	24.063	20.0878	48.1861	12.5683	20.549	8.39542	7.54041	10.8268	30.7601	26.8606	6.86906	16.9863	9.92348	10.671	7.57411	-0.75736	-3.3542	8.72846	-8.35157	2.38359	-0.11247	4.40764	-0.53469	4.7511	-9.74176	-4.05251	21.9723	5.08633
51.8	20.4704	15.9664	18.1943	1.6436	15.1581	13.2684	21.6017	29.3781	17.9169	43.2745	11.1309	14.8054	8.70695	7.59399	8.45717	27.8007	19.779	7.77547	14.561	10.257	11.6848	3.18221	2.2042	4.25294	18.2373	-10.6428	3.52059	1.05167	12.2132	0.203734	4.19681	-7.39296	-2.74917	22.3034	9.60278
51.9	20.4737	13.2813	16.8826	-1.61324	14.8459	8.15671	20.6873	25.2158	18.4866	47.3218	7.9364	21.576	6.81617	7.99839	11.6724	34.9879	27.3549	7.37155	22.5503	9.01132	14.6721	-6.15215	-3.04997	4.90369	7.72008	-7.4295	2.65567	-0.58885	12.1882	-0.15801	5.66855	-8.39408	-2.77842	20.3773	9.12129
52	18.816	14.3909	17.7664	-0.39276	14.18	9.63634	19.035	27.2963	19.3555	46.0089	12.6308	16.9255	9.39285	7.48623	8.40273	24.4012	22.7187	5.0028	29.4855	11.9458	10.4037	1.43942	-0.13169	-2.57607	10.9871	-7.81035	2.00774	2.08189	5.85868	-1.09238	12.063	-7.39029	-3.38937	24.8543	8.48206
52.1	17.3647	10.7741	17.6099	0.303936	14.7738	11.8341	18.1437	32.4653	20.1799	43.1271	16.4021	18.8531	1.57087	6.83465	9.46029	31.7486	22.1129	9.09243	34.5989	9.27868	17.3937	3.37075	1.28759	3.51602	17.3528	-4.61994	3.84006	2.2525	9.17384	-1.6472	11.3599	-11.2437	-4.0452	15.8755	5.85926
52.2	19.9891	12.4114	19.4415	-1.28677	10.9167	13.5333	16.9426	29.7486	17.8982	44.7992	15.656	18.8366	4.98158	7.44009	7.6184	27.8766	20.7761	6.91527	16.6054	10.4648	14.2485	6.98042	0.477043	2.28748	5.56191	-1.44202	4.74928	-1.0969	4.7695	-2.38966	13.1285	-4.36396	0.297195	17.7367	10.819
52.3	20.1941	8.46796	20.5603	0.281906	11.495	10.8541	20.8848	23.1406	22.6073	44.0771	17.816	18.4101	4.0801	7.42718	10.1803	27.6304	19.8602	6.59643	18.7814	12.4005	12.0845	2.87474	1.57938	3.84422	11.0544	-3.87194	-1.75497	3.77481	6.98568	1.76669	7.33054	-7.99206	-2.28458	25.1825	5.9627
52.4	18.3501	12.2743	13.1152	-3.4128	10.8206	11.9666	20.4251	25.3193	23.0756	44.6049	13.3869	16.5743	7.40418	7.53706	11.1469	33.2511	22.4905	9.12035	23.6292	16.1553	11.518	9.4848	-5.32244	2.5732	12.2556	-5.85594	1.53932	1.83406	5.4473	-0.27793	12.4518	-4.28745	-8.75357	28.2139	7.59817
52.5	21.4872	10.2457	15.6699	-1.39875	11.7369	12.357	20.3035	25.9332	23.0465	44.1705	10.4919	24.0677	3.7921	7.5604	9.5976	29.9907	19.1292	9.46907	16.5774	15.2495	12.2972	2.56092	1.87574	4.83576	12.329	-5.07987	3.0243	3.2283	7.40906	5.08781	0.403287	-9.95357	-0.35941	27.985	12.0579
52.6	17.8064	11.4039	19.2632	-1.78016	10.3253	8.80881	20.3723	26.3166	24.3452	44.9951	9.18867	19.5052	11.266	6.62703	11.2136	31.5538	16.789	5.61819	21.3434	10.5193	11.2896	0.839391	2.14643	4.27533	9.5642	-3.69258	8.15445	-0.9722	5.31303	2.55783	11.9246	-3.02883	-3.26436	23.3404	10.2327
52.7	14.4826	10.9895	17.1709	-0.25261	11.5886	12.8443	21.3808	31.0535	18.8273	43.2737	17.7883	21.7453	2.26797	7.28885	7.99093	33.4471	15.0051	6.15192	26.4099	11.7222	6.77334	0.379592	3.28215	-0.58373	13.8286	-11.0627	0.149638	1.24147	7.6016	3.82594	-2.41501	-5.78864	-1.24289	24.1062	8.321
52.8	17.2688	11.5062	13.7477	-0.61784	13.1424	11.655	20.9618	29.3359	21.8285	44.4108	17.2945	17.173	6.10009	6.0289	7.04231	31.8107	21.0005	8.18662	29.6232	14.5304	8.76202	1.25188	2.17078	4.07695	11.7945	-4.75692	7.68329	0.340775	2.96224	4.21829	-1.47112	-7.2349	-6.59996	21.4198	8.15879
52.9	16.6273	12.4842	18.1634	-0.56466	10.5112	10.3795	20.9541	23.2437	14.9035	45.0201	15.6303	17.8857	3.80792	6.60033	10.7033	30.8159	18.2125	6.65819	25.1143	12.8994	6.61636	1.74787	-0.07645	0.182823	14.9947	-5.80445	3.21895	1.90123	0.867343	2.0449	3.06001	-7.12983	-1.74162	23.4998	8.29834
53	17.934	9.4395	16.3421	-1.22901	11.3561	11.2592	20.4318	29.7125	20.9313	43.6866	17.1004	20.8891	4.55476	7.39902	8.28626	30.3108	24.7788	5.5016	21.6073	15.4354	5.76498	1.97094	2.70871	4.0045	12.8829	-3.17377	0.000248	0.236114	6.56445	1.96692	3.66451	-4.63446	1.00176	24.8999	10.8055
53.1	19.4819	10.161	13.8523	-1.74501	12.5629	10.1922	19.3798	25.9204	20.7274	42.2901	18.151	24.48	7.85008	7.51096	9.97452	33.2068	20.1317	7.69262	32.9826	12.2382	3.0749	2.26636	-0.92973	4.64091	15.9697	-2.42493	-0.30169	2.19409	10.3452	2.02936	5.22583	-9.72922	-6.67805	21.8551	3.67825
53.2	18.6913	12.2966	17.2693	-1.20484	12.7324	13.7902	20.4777	25.295	17.2195	44.5889	15.2984	17.7938	8.79041	6.66936	10.9221	30.1466	18.4308	9.85584	35.5624	10.6044	3.01979	6.41388	8.07743	-1.96067	13.9073	-3.16051	3.49301	0.775853	3.17813	-1.0612	10.6993	-5.44693	-2.18725	23.4464	3.91201
53.3	22.0561	11.9026	15.1027	-1.20567	10.7298	13.7019	21.2109	23.7252	20.0965	45.9196	16.3325	19.9276	8.03889	8.37244	8.84827	24.3715	22.2233	6.04325	24.1535	11.2899	11.6305	6.90147	-2.52077	1.00612	9.47272	-6.67108	5.32206	2.54689	8.30407	1.47865	0.846422	-6.55172	-6.05843	26.7861	7.43863
53.4	19.746	10.7709	20.9548	-2.37997	10.3426	11.48	19.1223	24.5061	26.1433	41.3706	18.084	19.4291	11.1602	7.57063	9.024	35.4275	13.5223	2.14267	16.268	13.1339	8.18424	7.58348	-5.98577	3.66971	10.8672	-0.75492	2.80214	-0.1012	3.65924	2.27814	4.41281	-8.51328	-4.20803	22.0843	10.4151
53.5	17.2805	10.5667	14.7289	-0.90653	10.3138	10.356	19.8994	25.4869	21.7781	41.9521	16.9711	17.5992	8.04164	5.77313	10.0159	33.2241	15.4273	4.10007	19.3194	9.53895	9.12366	4.47669	3.18527	1.54183	16.9546	-4.92768	0.793192	1.26203	8.69231	4.95832	2.19798	-4.49245	-3.95371	27.2783	8.77059
53.6	17.1596	11.0559	19.683	-1.01651	8.42965	12.0426	19.9416	27.0567	23.5165	41.5452	15.6681	18.0034	7.57641	7.36772	11.8002	29.0119	14.7794	6.14848	28.3459	10.9979	11.9341	-0.29564	2.97471	3.63725	16.1825	-5.42646	2.38835	1.02739	4.86921	3.15947	-1.15403	-6.50946	-4.29263	26.8377	8.78393
53.7	16.4235	13.2216	17.2286	-0.53748	9.95032	13.6854	21.0913	24.6822	25.3547	40.0846	10.1683	20.4387	7.7833	6.65801	9.9543	27.0351	16.4719	3.10895	25.0525	10.6635	7.54094	0.846101	2.00099	1.51251	14.4409	-7.03707	-3.0776	-0.8795	4.66708	3.1063	-5.38241	-6.59292	-4.11155	28.0852	13.5896
53.8	15.7015	12.8563	16.408	-0.79864	11.0254	10.2034	24.2842	19.8425	25.918	44.273	13.4503	19.9145	8.3577	5.90192	9.76051	22.4032	10.6771	6.33516	23.5779	12.8962	12.0184	12.3497	3.38551	1.09264	17.0921	-6.17035	-1.87021	-1.18927	5.76802	-3.25616	-7.38619	-7.89916	-4.12999	27.9126	3.23842
53.9	16.7092	14.0121	23.1615	-1.27112	9.07096	12.2406	21.7533	23.2562	24.6671	42.3632	10.2778	21.6219	5.49259	6.62338	11.1931	23.6294	12.3704	5.62523	24.6041	10.2338	11.228	9.47708	-16.1937	2.16187	15.4098	2.86392	1.5258	-0.10252	5.04102	0.094053	8.05933	-5.68172	-3.5403	24.0284	11.0067
54	16.4559	10.7926	20.3021	-0.55282	12.4517	10.9173	19.9252	21.2172	21.9847	42.5075	16.7459	25.4377	6.61718	5.84807	14.6659	29.0543	17.4375	3.37802	24.6394	12.6591	13.0335	7.59457	6.97058	3.12597	17.3941	0.182625	1.60521	1.56178	9.65436	3.6549	8.22219	-3.69935	-1.67266	16.2689	9.46913
54.1	20.7988	10.5187	16.9505	-3.12948	10.0339	13.438	20.7897	21.7751	24.5966	41.2713	12.6382	22.772	8.81572	7.23237	12.3994	34.6824	13.6782	5.11755	23.7799	12.1863	9.23491	1.20629	5.32158	-5.07593	9.36695	-0.47671	5.91098	2.535	10.7875	4.93383	6.23234	-5.87133	-1.30489	22.4482	11.3201
54.2	18.7702	9.11329	16.6826	-1.53487	10.5931	11.2432	18.7041	24.8152	23.1537	44.858	13.9071	20.8265	4.19815	5.08777	11.4244	24.7906	16.268	8.02137	21.4493	14.2618	11.6554	4.16542	1.99195	6.42542	15.3081	-1.87553	4.59039	3.00862	10.0505	3.40999	11.6368	-4.12568	0.114029	21.3197	5.66753
54.3	17.3246	12.6338	14.6773	-1.17687	12.2501	11.7973	19.0068	25.6138	17.8155	45.5831	14.5235	22.4492	3.15399	6.4468	9.38205	24.1199	15.3765	4.99626	21.5101	11.4299	5.98194	2.41527	4.14419	2.83461	14.0439	-0.62541	4.99987	-1.29557	3.25988	-0.03381	11.5523	-5.90094	-0.68741	23.0004	13.403
54.4	17.5193	11.1686	15.5424	-1.76355	11.1635	11.0063	19.2406	22.2671	22.7852	46.2762	15.5495	15.0212	4.48616	5.84097	8.51784	24.4445	16.0934	3.18629	17.9258	10.9176	13.2553	0.28085	0.599532	3.38081	15.822	-2.0746	3.97732	0.286037	8.46877	1.24918	11.5718	-5.50328	-0.54979	24.4184	5.39378
54.5	13.5769	9.18244	16.9134	-3.03843	10.2045	16.9551	20.358	27.0898	22.2386	45.5573	13.2717	15.5494	5.13211	6.87486	9.4694	25.6057	6.37802	5.48232	26.3253	10.8256	9.86009	-4.92669	-3.71223	-2.37536	16.2073	-2.99681	0.24658	1.24359	8.24411	-2.18742	13.1094	-6.38371	-0.42697	24.7665	8.04009
54.6	16.0585	8.25037	17.7087	-2.46428	10.4883	8.72631	15.7871	21.0095	23.8351	44.0378	10.3966	18.2503	3.99057	7.14282	10.8221	23.3741	13.2613	5.75154	14.256	15.3404	9.7442	4.53885	3.51593	-0.48	16.7582	-3.05132	-1.39192	1.25482	6.67617	2.77207	10.4758	-4.75074	-2.33901	27.1693	7.67398
54.7	14.2175	11.8271	14.7314	-3.48585	13.2523	9.63733	15.9657	30.2801	18.8689	43.2547	16.0158	17.5974	-0.90978	5.75344	11.0243	24.5838	9.94212	5.2393	15.2518	14.0974	8.28076	3.70561	-1.17456	1.23783	11.7482	-5.30517	0.932272	0.144905	8.65404	-0.88652	7.24303	-5.47559	-1.63839	23.7884	10.8812
54.8	14.9251	10.3808	16.2637	-2.27076	8.12782	11.3984	18.4329	27.6891	21.2489	41.4064	10.0835	23.2009	4.41064	6.01706	12.496	29.2886	18.9025	2.92109	22.7616	13.9574	9.26044	0.757097	1.46573	0.869248	10.0171	-1.26528	4.54959	1.62021	7.73179	-0.20397	10.4701	-2.01808	-2.69397	27.7636	11.5992
54.9	19.8763	11.5919	14.5966	-1.94497	10.9274	9.76969	18.6617	24.8255	19.5855	41.4346	15.825	19.5918	2.32566	5.64637	9.33214	27.9811	10.332	1.04459	17.5309	15.6895	8.29049	2.85317	0.252683	2.50259	8.32401	-2.58832	2.88426	0.733148	10.4713	2.64382	8.48662	-7.31596	1.106	30.9592	9.36078
55	18.9476	10.474	17.0956	-1.61367	9.85668	5.97667	16.6775	23.2824	13.3437	42.1128	15.0812	21.814	-0.47608	6.81566	10.8339	23.5371	13.6421	3.33888	17.1665	11.1032	7.93523	-0.48005	1.73559	5.03796	12.7655	-5.78435	4.37786	-6.7e-05	1.13427	-0.47023	10.893	-2.34201	1.72027	32.649	8.46862
55.1	13.3484	9.8955	19.1523	-2.53351	11.5853	8.60021	16.8787	24.7872	14.7055	41.9361	14.9688	15.6579	2.3269	6.49495	11.2573	27.4785	14.5452	3.08321	19.9584	12.9108	10.0175	2.83973	0.120109	2.45726	15.9396	-4.61754	3.19976	1.98268	11.566	1.12789	8.0546	-2.9112	-3.52301	32.6726	8.34703
55.2	19.5057	10.2466	17.2658	-1.8844	10.7561	7.73802	17.2615	23.1783	14.1072	39.7143	10.7134	17.3586	2.39624	4.31761	13.5839	23.91	16.5491	2.84939	28.1102	12.8221	7.0954	3.15186	-2.1303	4.25876	15.2759	1.67603	3.2201	1.4639	11.8346	2.3237	5.2771	-0.56925	-0.58658	33.2771	9.7396
55.3	22.6077	10.1292	10.1659	-2.93176	10.7301	7.03726	17.4489	27.8158	21.3852	38.8353	9.16857	16.5346	-0.10568	6.60999	14.5576	28.7233	14.7492	3.88257	14.3845	16.0245	12.725	4.74792	-4.19496	5.1732	14.6151	-1.77765	-0.3336	-2.86794	9.64911	4.46635	10.1724	-6.43253	-2.73282	29.145	11.2669
55.4	18.5915	10.2337	15.0584	-2.87869	10.0517	9.25698	20.5844	25.0465	15.5731	41.3397	13.8111	18.3485	4.16717	6.12889	12.7833	31.8899	14.3875	3.99848	16.2137	12.2424	5.78146	2.05908	-1.63921	3.0713	14.3874	-3.02266	1.07708	2.64989	13.5711	-0.60592	5.74171	-4.98319	-1.24382	30.1679	10.2183
55.5	14.5512	10.1152	14.0605	-1.14126	9.11907	11.0493	20.1919	26.0139	21.8619	40.1293	13.0189	19.06	14.4761	7.29059	13.3308	26.1217	12.1624	3.14958	13.4533	12.5147	13.1695	2.33569	-2.09585	2.71069	17.5445	1.10628	-0.55627	0.187692	10.2079	-0.66613	9.97457	-3.99766	3.06728	26.1917	13.2074
55.6	16.5327	12.5526	13.1368	-1.79827	10.5166	9.09149	17.9936	27.5013	18.4649	43.0017	12.9925	21.5148	0.917973	4.85914	12.6302	30.6532	15.8042	3.64785	17.4972	15.2372	13.884	6.34054	0.371727	0.226624	17.3795	1.40345	0.260798	0.242962	5.21058	-0.1704	11.7487	-10.1922	-2.22232	35.2307	11.9987
55.7	16.3127	9.84766	10.7144	-2.79151	11.6563	8.00901	16.7041	28.5954	19.0898	39.5698	14.0042	21.4088	8.54878	4.95431	8.10122	29.4565	8.36526	4.21486	12.47	14.0562	10.0799	-0.25435	-2.77879	2.50944	16.5647	-0.53274	4.69334	0.395898	9.45504	-0.39362	11.4602	-2.69127	4.70425	34.3423	9.94912
55.8	16.8658	8.95703	11.0613	-2.60962	11.7425	9.59342	16.8041	21.6206	18.3255	40.3138	13.2245	17.2923	7.89373	5.86179	13.4415	20.3938	9.73537	0.876521	11.8114	12.1848	5.19785	-0.48741	-1.17164	2.53301	19.0983	5.24658	1.31709	1.88724	9.50092	-4.38469	11.4532	-7.58602	-0.6397	29.5839	10.9779
55.9	13.6586	8.48608	17.3073	-4.17346	11.0089	7.99261	14.611	26.8235	18.1379	39.4607	13.4763	17.6099	6.79544	5.82782	14.4009	27.9368	14.6773	0.671274	17.6034	12.2396	15.5913	12.2521	2.81568	2.93407	12.9543	-3.0369	1.7823	2.40458	11.1147	1.29053	11.1633	-2.55089	-2.52773	31.6771	10.2443
56	18.2223	10.0722	16.4565	-3.68013	9.91979	7.58159	20.1565	25.8793	18.1499	39.4913	13.4927	18.4591	9.56545	4.82909	15.7737	29.9403	15.3355	-0.19361	16.9331	10.136	10.494	6.14613	4.01861	-0.93182	12.4481	-3.73771	-0.14997	3.13255	10.0074	-0.51167	14.1064	-4.56374	0.829712	33.4455	8.83596
56.1	21.1136	9.77752	15.6352	-3.89804	9.23632	9.6257	19.3494	24.6567	15.3102	38.7555	13.6683	18.1571	10.4687	4.79675	15.867	22.788	13.7228	0.833746	16.0807	13.1671	13.3637	3.53069	2.49344	9.17683	11.1853	2.9288	2.69485	2.56035	13.2905	4.78154	12.4787	-7.44246	-2.08782	31.6479	10.4039
56.2	18.9852	9.5948	14.6391	-2.04373	12.9915	11.038	19.1815	26.7146	14.0933	41.5638	14.7906	12.4662	3.03669	5.36632	10.4906	24.017	10.1721	-0.51857	17.099	14.5076	4.01294	3.22965	-0.387	1.40409	17.4365	0.764464	1.48726	0.470158	8.22868	0.584162	10.5014	-6.33591	0.614955	31.9809	9.87824
56.3	16.688	9.69079	18.4658	-2.69651	11.5465	6.13292	17.4981	24.9251	16.386	43.1804	13.4835	16.2508	9.49163	6.463	16.7735	33.4539	9.00076	1.49903	25.5156	15.4519	7.55456	5.70486	-0.74219	2.4678	20.9238	-4.41604	-1.97094	3.18215	6.18173	3.34303	7.3522	-8.12933	0.302362	36.0484	9.47051
56.4	16.809	10.64	16.7484	-3.52818	10.9688	8.09775	16.9022	26.8881	14.8617	42.0054	12.1498	18.4511	9.3688	4.84933	13.1312	24.6903	13.152	0.327091	20.7781	11.173	8.77887	4.42107	4.73463	0.649237	16.0135	-4.69131	2.10219	1.75501	10.4264	3.30141	5.7776	-9.49941	4.06348	35.341	7.88348
56.5	8.52599	7.93717	18.2626	-3.55404	11.4392	10.5645	13.0764	30.8657	18.9154	42.302	9.50428	19.0969	3.92734	5.86031	15.4246	23.0791	7.50278	-1.51038	25.2263	15.9172	13.7829	1.97343	7.28586	-0.98075	14.3975	-3.92562	4.12909	-0.70177	7.39321	-1.97272	2.26975	-1.64164	-0.30609	35.7225	10.4055
56.6	9.87889	5.19582	18.6939	-3.86268	7.12093	11.8719	14.476	23.1018	14.1455	39.3864	13.6059	18.6993	4.85626	6.3848	16.3	26.4492	10.6257	-0.0486	14.7376	14.2146	7.07347	4.02499	0.648294	1.34386	11.5903	-5.04458	0.290754	2.16446	4.69125	-3.37512	8.15262	-9.19725	2.73321	28.0174	11.9403
56.7	11.953	8.32689	15.2437	-2.23167	9.81525	9.67586	15.982	19.1478	16.5733	37.7371	16.1211	13.2792	-0.7401	5.97471	16.6577	24.2498	19.4933	-1.31536	17.7333	13.142	13.6361	10.0623	7.15646	2.5748	13.377	-3.15361	2.77345	3.02178	7.92769	-1.10917	10.9103	-3.56166	0.418023	34.7883	8.01482
56.8	17.4007	7.46036	14.4834	-3.41122	8.16637	11.3071	16.0836	18.9388	20.923	41.3282	14.1481	17.8683	4.40566	6.50555	17.0366	27.1855	7.39193	-1.8255	15.9731	10.8157	11.6481	-0.40507	9.20893	8.77821	14.0549	-2.34622	-2.62863	0.263063	10.0545	1.7692	7.53866	-5.12959	2.5952	35.2653	10.0562
56.9	8.59159	8.4849	16.8791	-2.91462	6.68751	7.83682	15.7794	24.4203	12.6119	40.394	13.5869	18.4778	8.61484	5.05498	17.5131	22.5549	11.278	-0.50126	22.8517	7.99102	10.2064	3.12761	3.75835	1.53641	16.7001	-2.1681	-0.78515	0.526827	10.0985	1.03406	11.5729	-1.42942	-3.0217	27.8057	3.81372
57	14.0363	8.7018	16.3735	-4.41886	6.02864	12.6233	16.5419	21.7469	17.5949	38.4366	10.7691	19.9403	6.39882	4.37182	16.2533	28.8252	13.0805	3.51421	19.2734	11.8237	14.7292	4.34827	-1.9874	1.88845	10.0314	-0.49849	-1.01991	1.41324	9.817	0.916198	8.28829	-8.29875	-0.41557	29.9539	6.94156
57.1	10.4193	11.0206	16.3384	-2.66896	8.6671	8.90234	13.2592	23.3253	15.7277	39.3093	10.9899	13.2225	-1.8693	6.71891	14.3149	25.2839	15.2748	0.955295	14.9039	8.12516	3.8021	-2.39604	-0.595	3.11021	11.9921	-0.9234	-1.1339	3.57197	4.6737	-1.21227	9.51003	-4.08819	-2.03625	33.1259	11.825
57.2	14.1323	7.82343	16.5399	-4.16919	9.69997	13.0605	17.4695	20.6979	9.82693	37.2519	11.2141	13.7914	8.12525	6.58227	14.7092	24.6806	12.0979	2.18246	20.7588	14.2181	6.0616	5.97934	-5.30269	5.55289	12.5775	3.66952	1.46989	1.7103	6.56272	3.47555	9.87218	-4.987	-2.06133	33.4995	12.3667
57.3	10.155	5.65858	17.4177	-3.52813	7.68121	6.9578	15.4946	23.3914	15.1734	36.1475	13.7594	16.1047	5.22883	6.1292	18.4941	28.7181	6.24285	2.56071	18.6226	11.1564	10.8986	3.13823	6.74195	-0.39302	16.8913	-5.8076	-2.66498	2.37884	7.67859	-1.74216	10.0779	-1.6566	-0.42634	31.1011	7.63863
57.4	11.3892	7.74382	12.4001	-2.17612	7.17997	8.08317	17.83	23.9035	12.265	39.6185	13.3628	18.1666	10.9791	6.19573	17.2886	26.2058	13.2748	3.47212	11.7975	11.6825	12.2189	3.84523	0.417663	2.07382	14.5458	0.97141	2.12646	0.200053	11.5811	0.851431	8.94832	-7.27102	2.00559	35.3095	8.53135
57.5	14.1204	10.1014	16.6346	-3.53994	8.03804	7.31658	17.1416	21.5273	15.2962	36.1576	14.4079	15.3847	9.18025	4.33415	16.8216	21.8855	15.7201	2.924	15.2695	13.9098	6.44489	0.418283	1.03059	0.467506	14.9268	-0.10854	1.50598	1.49376	5.9967	-1.54312	10.3765	-3.25314	-1.87959	31.8281	6.50611
57.6	12.359	5.59901	13.9557	-3.37604	7.62346	11.5266	19.6022	21.2166	15.171	39.7085	13.2556	17.0926	4.4793	4.65521	16.7452	31.5671	18.7385	0.1136	17.1719	14.5728	8.77015	4.51693	3.46949	3.80008	10.4276	0.485361	-0.0886	-0.8468	4.38866	-2.78539	4.59188	-6.96348	-2.44391	31.2723	9.17283
57.7	14.6293	8.93227	16.2472	-5.26018	8.66658	10.3069	15.2506	20.6983	12.0922	40.9952	11.6231	20.4742	-3.09786	5.25124	15.6794	21.7215	15.4566	-1.36414	23.4515	16.0209	6.12491	-4.74375	3.2821	1.67954	9.21079	-0.6235	2.5417	0.156581	9.27282	-4.70232	7.33437	-0.7736	-1.564	25.7802	12.354
57.8	12.2647	7.92719	16.1468	-2.07355	7.4572	5.69774	14.5853	20.541	17.111	40.0805	13.4062	17.528	3.62637	2.76252	17.9034	21.9826	12.434	0.36312	17.0772	10.5643	6.94346	4.01125	-0.99936	7.41281	12.5308	-2.31825	-0.85464	3.61236	11.5231	1.11543	6.73759	-6.39938	-4.30678	27.4648	4.88159
57.9	17.1523	8.00155	15.1446	-4.24689	9.1983	8.06706	14.5346	25.7807	12.7474	36.8704	9.28716	21.5708	5.53944	2.76398	16.2565	27.5726	10.493	2.71542	10.5756	16.2066	9.3681	5.50915	-8.70449	-1.43055	7.05699	-2.78365	-3.21585	-2.78058	13.1635	0.554341	13.8673	-6.13542	-2.11214	34.0718	11.0041
58	14.0461	10.025	14.0695	-2.53212	7.1162	6.07163	14.9641	23.4767	20.7029	39.1303	8.04879	17.0909	6.18899	4.08245	16.7703	27.4883	8.22268	1.15456	24.9314	16.1881	11.4664	4.63491	-7.71365	2.71171	9.10707	-2.9982	-3.00231	4.25052	2.49313	-1.17287	11.3226	-3.00258	-1.22613	34.3121	10.1905
58.1	14.3886	7.26554	12.3662	-3.16813	8.45138	5.84737	7.40102	24.7782	17.379	36.9819	13.7627	18.3051	9.91951	4.58843	15.5505	21.2249	11.624	5.34671	16.0597	16.3825	1.54197	5.88916	-4.56039	0.024239	13.1516	-2.52179	0.112281	-0.14367	6.67694	0.578676	14.381	-2.93637	-1.2221	31.8378	7.19265
58.2	12.7629	6.88026	14.9652	-2.29944	7.62334	7.74522	9.60692	25.0199	17.8325	40.5333	11.5726	17.9288	5.7909	4.17863	16.2168	26.5674	15.4147	0.360643	11.2327	12.6108	5.48135	9.49781	-7.50619	3.98704	12.6333	0.251999	-2.1137	-0.47234	10.3838	-1.71135	10.6648	-4.78252	0.495029	32.9494	9.86391
58.3	17.9903	8.12753	12.0955	-3.55092	10.294	4.9576	10.3784	23.2291	16.6568	39.2607	13.3429	18.5535	5.56804	4.38162	16.8073	24.5905	14.0602	2.18624	13.1758	13.2389	4.47303	4.28787	-1.15858	2.60418	6.67718	0.433672	-3.80473	-2.00867	8.28222	-1.43397	13.8587	-2.80544	-7.07017	32.889	10.0245
58.4	14.7389	5.55681	16.6317	-3.25373	9.58661	4.55689	15.0061	15.9421	17.8335	40.2421	13.1742	15.5601	-3.77533	5.14982	19.3186	17.7809	18.4836	0.642104	11.347	15.491	10.9735	3.14022	-3.54531	1.7415	10.4627	-5.1171	-0.13465	2.72889	8.0945	4.00926	13.0982	-3.38435	-2.74722	32.7257	7.95146
58.5	11.4485	7.06395	15.047	-4.12878	10.8602	4.23934	14.3784	16.8329	18.6114	43.6999	14.182	12.8087	4.9643	5.42669	14.2888	21.2738	7.35451	1.32184	15.3439	12.0819	11.6982	-0.54111	-4.27167	-1.01645	8.73493	-0.32083	0.564548	0.161599	7.05583	0.267142	14.0394	-7.56533	-2.55622	30.48	13.7095
58.6	12.2954	10.0672	16.2199	-3.48068	7.67818	8.69705	17.5826	16.2006	14.2031	37.8274	7.3258	20.0089	6.85005	3.11973	17.7688	28.7441	10.6149	-0.18862	18.4315	17.0852	5.96044	2.04614	-2.22754	-1.92932	5.3215	-3.10628	0.991281	3.78107	5.22375	-0.75347	11.3678	-3.69419	-1.97493	36.9014	9.11545
58.7	7.51518	8.10186	16.6603	-5.8715	7.21065	9.77333	15.7076	18.9359	15.7206	40.2978	7.29348	17.2997	7.92595	4.4008	16.2455	33.181	11.3305	-0.36966	17.0233	13.8649	9.77141	8.87704	4.39895	0.887448	9.66567	2.2482	1.36611	2.25944	6.36091	-1.09607	6.93503	-5.04057	-0.75459	31.3007	11.2363
58.8	8.04957	8.42302	15.0265	-3.6844	7.62115	8.56746	15.4245	18.0408	16.5668	36.3545	12.3282	15.9003	15.7177	4.75057	18.7349	24.9527	14.4095	1.0265	26.7051	15.514	3.15793	3.55584	-9.11916	4.09926	9.83159	0.450603	5.52695	-0.82749	5.9482	-1.59359	11.3015	-9.93284	2.26206	26.3772	10.6896
58.9	10.8273	5.14962	12.8822	-3.04676	6.85657	6.44549	18.7035	18.9613	15.6825	38.1868	8.45091	17.559	4.63689	2.93276	13.7164	30.3879	7.43297	1.63646	18.5342	15.9825	0.697375	-0.66957	0.291617	2.12455	7.36124	-2.02216	7.39126	-0.0575	2.07783	0.989077	10.8915	-6.24495	-4.10868	37.8835	10.928
59	11.5129	8.48445	16.259	-3.63082	8.38576	3.88957	15.0199	21.3133	12.587	40.1971	11.4779	15.173	8.62892	3.32127	14.2561	28.9323	4.41907	3.49144	13.8491	15.8958	8.21325	1.5994	-3.79901	1.80692	12.1093	2.38382	-1.15082	2.78201	11.2292	1.88408	8.45375	-0.84532	-4.34324	37.3657	11.1768
59.1	8.839	6.00814	15.9678	-2.32793	6.81595	6.06088	17.2303	18.5321	12.4968	36.6444	10.9787	12.8181	2.2249	4.23145	16.2486	28.5462	13.886	3.45924	18.1654	12.8785	7.5858	0.659523	1.99508	2.06542	12.2258	3.79023	1.09477	1.85616	14.4885	-0.81569	7.79006	-4.91636	-2.44288	34.4847	9.95004
59.2	7.94474	9.01297	13.995	-4.90311	5.16841	4.99076	17.1223	23.2366	10.3519	38.1238	5.00801	18.8429	8.12352	3.77166	16.2903	23.492	11.928	-1.04622	15.9914	13.1416	8.50139	2.64803	2.22425	-0.96091	10.3074	3.78258	-2.63218	3.05283	16.1438	0.629387	9.89764	-5.66996	-2.10213	34.1679	7.88531
59.3	10.2115	4.79303	11.3651	-3.23214	6.76572	0.831323	20.4091	18.8604	13.3185	36.8555	4.03736	12.8166	6.27057	4.07676	19.8228	32.5886	7.45151	0.517808	18.6863	9.10215	3.14716	3.12046	-0.17566	0.940295	6.46088	5.04502	4.67804	2.48453	5.04644	1.05491	6.01864	-5.20382	-3.80487	35.8295	6.8194
59.4	12.9816	7.74009	13.588	-2.73864	9.07128	5.43117	19.3042	25.8318	8.09792	37.7327	4.35023	14.6739	6.28913	4.45195	17.7518	27.9139	15.965	3.33789	11.4386	14.4146	9.11621	3.21432	-1.30247	7.16386	5.78151	0.316363	3.84707	3.33265	9.49631	2.47175	3.43534	-3.5925	-0.21535	38.2833	7.84976
59.5	8.64161	5.39848	13.4675	-2.85195	8.28826	4.32556	18.2849	17.9115	15.4612	35.6667	3.93558	12.0908	11.3628	3.80909	13.2125	28.2293	10.1723	0.838609	17.4743	12.5384	5.89288	7.62233	0.741793	3.73825	9.37233	1.11954	-4.46112	1.68758	8.22847	-0.15843	8.22661	-6.37991	-4.96997	43.5169	11.3251
59.6	9.66796	4.96269	15.207	-3.00175	7.50389	6.64424	14.8631	21.1969	13.153	36.135	7.98434	15.8087	3.00011	2.93219	16.2403	24.7126	8.49182	2.69442	17.8484	13.4777	2.48485	2.49961	-2.4773	-0.47794	9.69263	0.606885	4.29435	2.86189	8.93919	-0.22164	0.134693	-6.24181	-1.48079	40.1202	10.2277
59.7	14.5566	6.84301	12.546	-1.57384	7.20487	8.48181	15.2225	21.9261	8.721	36.143	10.0009	15.2101	4.23647	4.53702	16.6723	20.3674	8.7568	-0.3017	20.802	15.0886	9.27354	0.685154	1.05356	2.30017	7.12206	1.58253	0.03961	2.98766	6.67098	6.06789	-3.15582	0.823934	2.48838	35.9283	10.9003
59.8	14.061	9.30806	13.2245	-3.73849	7.07639	6.84635	14.563	18.8982	19.267	37.063	9.91082	13.83	7.12081	4.71254	11.8779	26.9477	8.35448	-0.30073	14.7129	13.0672	5.33674	6.75662	0.361753	1.0484	6.32983	-1.57475	4.24191	0.484263	10.507	-0.26023	3.31722	-10.0591	1.81454	43.1531	10.756

## Sheet: Figure 4C-E, G
Figure 4C: Peak current(pA)
ACSF	CTOP	TIPP-Psi	CTOP + TIPP-Psi
79.0719	103.848	25.7099	9.10954
65.6938	68.4972	19.231	5.79
80.5089	82.3507	31.7627	4.4
23.0462	54.675	17.9792	8.69
108.071	20.2255	3.57154	7.58227
75.5485	42.9392	62.9424
96.2794	126.087	19.0693
125.499	148	22.4627
81.7112	61.9458	18.8693
	116.759	22.0486
		46.718
Figure 4D: Peak current (pA)
ACSF						CTOP						TIPP-Psi
1mW	4mW	13mW	40mW	84mW	140mW	1mW	4mW	13mW	40mW	84mW	140mW	1mW	4mW	13mW	40mW	84mW	140mW
15.3669	29.8153	50.0351	72.1367	79.0719	79.267	9.30034	30.1969	47.3823	91.4597	103.848	85.3963	7.74253	7.21028	9.35536	15.3189	25.7099	35.3237
17.3665	21.7085	38.0476	57.3716	65.6938	115	13.7672	34.6627	49.6593	64.2871	68.4972	21.8908	0.846389	3.19207	9.12758	13.8101	19.231	17.9094
14.1855	33.5781	55.7931	78.1932	80.5089	80.8996	7.62803	24.7904	48.6106	69.1555	82.3507	134.105	5.89015	13.4209	20.7003	27.8221	31.7627	4.90257
2.23173	4.8	6.96927	19.2165	23.0462	95.6485	8.1758	24.6789	35.5459	52.8869	54.675	149.554	-1.10374	0.176555	2.25491	10.633	17.9792	24.5022
16.1723	30.5911	58.3	97.4	108.071	143.429	-1.11964	5.7686	15.1507	18.7312	20.2255	69.4005	-0.13414	3.48747	45.0928	5.30023	3.57154	25.2512
5.47875	22.0414	43.0296	61.3709	75.5485	83.3825	3.02568	22.3556	36.1	44.8472	42.9392	127.13	1.43384	12.5673	1.77873	56.2	62.9424	22.4265
4.30549	23.1152	53.62	76.5436	96.2794		29.4954	64.5	89.3	125.504	126.087		5.36364	3.11451	9.16463	17.6964	19.0693	25.8336
9.62185	25.1448	50.3859	99.1258	125.499		36.6092	71.4051	114.644	144.84	148		1.56546	6.59142	6.0911	17.2168	22.4627	44.7426
14.2382	22.9748	38.1647	65.796	81.7112		6.66608	17.4252	37.0121	58.8425	61.9458		0.771829	5.85825	6.06336	14.2367	18.8693
						21.1126	44.9585	74.8335	109	116.759		-0.99792	7.08682	24.7109	16.2141	22.0486
												0.413956			39.2904	46.718
Figure 4E: Normalized % peak current
ACSF						CTOP						TIPP-Psi
1mW	4mW	13mW	40mW	84mW	140mW	1mW	4mW	13mW	40mW	84mW	140mW	1mW	4mW	13mW	40mW	84mW	140mW
19.4341	37.7066	63.278	91.2292	100	100	8.9557	29.078	45.6266	88.0707	100	100	30.115	28.0448	36.3882	59.5837	100	100
26.4355	33.045	57.9166	87.3318	100	100	20.0989	50.6046	72.4983	93.8536	100	100	4.4012	16.5986	47.4628	71.8117	100	100
17.8958	42.3608	70.3863	98.6453	101.567	100	8.9325	29.0298	56.9235	80.9818	96.4336	100	16.6748	37.994	58.6017	78.7633	89.9189	100
9.6837	20.8376	30.2404	83.3825	100	100	14.9535	45.1374	65.0131	96.7296	100	100	-6.163	0.9858	45.9944	59.3711	100.39	100
14.0629	26.601	50.7141	84.7266	93.9748	100	-5.115	26.3517	69.2104	85.5665	92.3927	100	-2.736	19.9664	71.6414	108.111	72.8504	100
6.7723	27.2454	53.1889	75.8606	93.3855	100	7.0464	52.0634	84.1038	104.444	100	100	2.278	12.3341	7.2595	89.2657	100	100
4.5014	24.1668	56.0594	80.0259	100.66		21.9943	48.1	66.5653	93.5864	94.0211		21.8904	29.3912	36.2938	72.2237	77.8269	100
6.7084	17.5312	35.1295	69.1114	87.499		24.4789	47.7454	76.6573	96.848	99.0131		6.1995	22.6769	27.1603	68.1821	88.957	100
17.0758	27.5535	45.7706	78.9086	97.9956		9.6052	25.1082	53.3312	84.7869	89.2584		3.4416	15.8391	23.4708	63.4816	84.1384
						16.6071	35.3642	58.8638	85.7705	91.8422		-3.863		55.229	62.7636	85.3485
												0.9252			87.8143	104.415
Figure 4G: Tau (ms)
ACSF	CTOP	TIPP-Psi
181.267	308.981	738.845
201.837	355.875	751.181
243.046	935.872	298.19
345.591	228.875	1009.74
405.359	288.159	970.012
208.613	254.314	1188.81
544.923	219.82	848.712
313.805	189.187	501.101
167.524	215.567	1290.3
166.75	585.089
245.07

## Sheet: Figure 4F
Time (s)	ACSF											CTOP						TIPP-Psi
0	-0.737333	6.04906	-1.05344	-0.0184294	-1.98757	-0.260279	-6.77691	-15.8987	-0.686505	0.385429	-0.497202	-0.892637	-4.80188	-1.68275	4.39142	2.97372	-2.31296	-8.83595	-29.7448	-4.64323	4.81092	6.90539	10.1101	-10.0441	13.0169	5.87616	-7.79786	2.63797	14.9361
0.1	-0.480998	1.86505	-3.0503	-10.1784	7.87069	0.954465	4.5283	-8.49783	-0.271991	3.95819	-2.08663	-0.0477522	-0.807292	2.55669	-0.903701	4.68964	-2.6873	5.45101	4.53737	-10.2686	2.6406	-16.0848	1.61399	2.316	-16.3716	19.6423	-4.9476	5.69427	5.04361
0.2	2.97995	1.53772	0.0365535	-9.02409	4.16209	-5.28593	2.58732	-6.92022	-2.66692	1.06489	-1.4978	1.14986	4.64346	-0.00574168	-1.50073	0.393766	4.79443	16.8143	-12.6419	-6.12336	4.4349	-11.1584	-3.28857	0.07534	-7.38931	-1.5515	3.37681	10.6867	-3.31013
0.3	1.19816	5.76108	-0.926339	-9.10901	7.85467	-1.64468	-2.06845	-14.736	-1.18252	-1.70101	-3.20671	0.681621	-4.29338	-7.40009	4.86911	-1.48418	-3.22414	10.2671	-11.0116	-21.6777	12.2871	-15.8511	11.7252	2.49339	-9.73077	8.20734	5.11877	0.228615	2.89585
0.4	2.16543	4.54527	-2.15695	10.1092	4.34055	4.13723	0.913831	-11.9689	0.386063	-0.801659	-2.02057	-0.09379	-2.11635	6.13494	2.33846	-1.25705	-4.07349	-4.82891	-8.12576	-7.01862	1.58598	-15.6077	6.92166	8.60075	5.25062	6.12842	1.05995	15.3184	-2.353
0.5	-1.86159	-1.77652	-4.10246	10.5945	2.23726	5.18247	-8.69353	-0.831481	3.44107	4.27271	-1.04192	1.61879	0.861063	-6.51681	-4.23211	1.22068	-1.69503	-9.53708	-15.3481	-30.9528	-10.8524	-12.6921	1.27138	6.15837	-13.3805	8.35658	0.267789	-8.15854	7.81557
0.6	2.47535	-6.97255	-1.69444	-0.144618	3.2871	1.183	-0.257428	-8.5511	-1.6439	0.677112	1.47731	-0.914722	3.78586	7.2149	-4.12921	-1.98704	-1.76797	2.48425	-22.0642	10.8276	4.91594	-5.95646	-1.16885	3.15389	-12.3582	-3.77452	-4.09516	4.07753	2.78251
0.7	2.37206	-5.23771	1.67207	7.30224	4.832	-4.27176	-0.306816	-1.39679	-1.59507	-4.81267	-3.35778	-3.33203	-2.80615	3.32905	-1.18726	-1.41321	-5.46184	2.73366	-21.1756	10.9242	-2.26715	-3.18044	1.89679	0.252494	-26.7278	-6.40222	-5.64012	12.6622	5.70655
0.8	-2.60835	0.250224	-2.87711	2.31103	6.13941	3.6122	-8.43347	8.27287	0.138725	-4.82261	-1.36459	-0.516407	-5.09128	6.82452	1.91756	-1.5501	2.02807	1.9637	-3.32851	-14.4829	-16.0581	-14.4584	0.642602	0.976981	-21.7655	-13.1037	2.85044	-5.19385	-2.54153
0.9	1.6526	-1.56409	-1.00663	3.08375	6.92865	1.49704	-0.17207	5.52655	1.13484	0.0773007	-3.10158	-3.87011	-5.13281	2.65866	-5.80024	2.92406	3.52711	-5.31326	-12.4521	1.72023	4.75447	-8.78631	21.7257	-6.97293	-22.4558	19.4438	-9.75757	-2.81484	2.55052
1	3.6807	-6.53195	-0.896022	-1.82196	3.72437	-2.33375	0.618869	12.6936	-1.09801	1.82074	-0.741434	0.220785	-2.81822	0.955078	-1.95421	-2.61711	8.87121	-10.3493	-7.04813	-6.39512	-15.5817	-15.6945	2.5229	-4.10899	-49.8871	-2.82966	-3.38635	3.32037	-0.690551
1.1	16.8989	12.1981	11.9653	1.44205	10.5643	20.1178	8.23497	41.644	24.7517	36.0882	9.87954	14.3992	9.06451	0.0451418	1.60334	8.17926	24.938	18.4794	-3.60857	-3.62679	44.4838	28.7915	2.01465	-1.31744	-33.415	-8.66363	0.0516916	10.5167	3.21054
1.2	45.9866	40.9486	70.3534	3.77308	26.4064	28.7777	17.2055	124.246	86.7157	94.3912	30.2537	49.8352	48.9195	8.48642	27.7715	33.6825	60.8569	37.517	-6.84407	14.3335	65.2048	38.2119	6.00311	9.52261	18.4971	23.5647	26.7618	15.2879	8.18166
1.3	66.7253	74.6346	99.7483	20.732	38.8183	47.1444	34.204	162.731	105.813	119.642	49.6737	76.5348	75.3463	13.7996	41.2813	54.0731	94.1186	23.554	8.98586	46.4195	122.645	65.9404	8.31224	11.052	12.7864	-3.88849	21.5507	56.7565	16.8321
1.4	75.5854	84.3031	114.862	48.9878	46.8024	53.2792	40.0557	167.656	109.265	125.585	65.0268	89.5313	86.2333	19.5676	53.2312	65.4269	97.1433	55.3143	3.21156	52.8427	109.36	48.8636	22.2428	18.1348	27.1725	21.6622	43.0229	60.124	38.8335
1.5	80.4853	89.4654	122.915	49.4677	51.779	56.043	43.1895	167.14	112.862	127.175	68.1932	105.34	101.64	21.2306	62.6438	66.2293	109.458	69.65	10.1267	58.5024	131.347	57.4973	22.0879	35.6773	20.4686	73.7061	45.4805	76.3156	29.6155
1.6	83.9515	87.8223	126.98	48.7436	57.2929	51.2358	45.3542	151.06	101.158	130.391	65.6234	110.883	102.766	21.6519	57.7851	75.1267	118.349	83.1707	-35.8714	69.3709	143.27	56.3574	21.5916	30.988	32.1884	11.9955	67.9248	104.833	41.6541
1.7	81.2505	95.8202	124.669	45.4354	60.6169	54.1264	60.4605	163.663	104.684	142.718	68.3444	120.441	110.953	26.4959	58.3128	78.2846	129.786	65.7669	-2.8801	73.6746	118.302	81.9705	20.5541	38.8721	29.0872	7.90265	58.0395	95.1443	40.8236
1.8	81.5583	93.531	129.034	51.2738	59.162	56.616	64.3946	162.965	104.049	141.609	76.5138	119	111.392	29.6128	58.8874	74.7512	116.172	88.1872	14.6947	86.2435	147.779	91.04	21.9226	44.465	17.9145	23.3195	71.2277	97.421	49.7595
1.9	86.4567	95.9406	135.284	52.8151	62.0882	52.5288	61.3224	153.521	100.688	147.309	70.3001	124.644	113.291	22.4756	61.094	75.527	122.9	83.2683	9.01234	83.9226	135.188	94.5283	13.8152	53.6011	28.0592	56.2932	81.321	118.528	38.8944
2	80.9166	92.9756	133.843	70.84	63.0885	54.003	65.2265	164.58	99.1076	144.252	69.3273	124.322	120.234	29.3426	60.4513	74.5092	125.708	86.1379	20.1518	67.8131	148.159	87.5924	33.1187	44.9853	43.3741	6.32459	82.1603	126.171	39.7119
2.1	82.1541	91.9722	133.337	60.1324	63.4444	56.2797	67.1475	175.622	100.97	135.267	68.9532	119.856	118.883	23.8674	63.2086	74.9678	122.939	88.1597	-1.05496	81.9586	154.146	96.3173	26.2978	50.5246	36.737	15.4184	64.9009	127.477	48.3584
2.2	81.2037	87.6638	135.187	57.7873	66.6871	57.7138	74.68	179.095	95.5402	135.363	71.392	119.603	128.618	33.6726	66.1818	72.0642	105.587	97.2607	-24.2869	75.096	149.108	104.167	25.8612	59.2257	30.2547	17.3504	74.5537	130.831	65.141
2.3	90.7628	100.166	135.225	51.5909	64.3984	57.3835	72.8039	166.734	93.8357	139.895	67.4	127.041	124.645	32.3447	70.3317	72.2556	109.131	85.1423	-5.58769	85.482	169.872	105.051	54.6748	55.3949	28.7134	48.1523	80.3697	131.295	62.1307
2.4	78.8601	92.9922	135.968	57.239	65.7257	57.9809	73.5329	164.292	95.5344	140.326	67.6686	128.217	129.891	37.2399	69.657	70.8014	112.529	90.3889	15.5128	78.5348	168.876	105.129	43.2797	52.0636	33.6153	43.4495	83.4956	150.367	61.9158
2.5	83.3815	92.3746	138.752	56.0285	66.1775	69.1877	76.3481	175.183	97.2749	138.151	67.9039	125.663	128.151	35.9548	63.6425	78.6893	112.293	107.732	2.47129	65.5074	160.005	120.746	23.6738	55.5097	38.5287	63.322	92.1066	158.707	61.4916
2.6	81.7102	86.3979	138.14	53.7695	66.5493	54.3255	70.2606	159.258	93.8537	137.167	69.4691	126.57	130.095	37.9828	63.5726	75.4706	105.594	106.049	16.0147	80.7373	151.972	121.967	41.6453	57.2481	29.2577	32.9669	91.3981	157.478	53.3244
2.7	86.3212	90.7854	139.513	61.2629	67.4531	63.3977	83.0255	167.568	92.619	133.548	69.6521	127.784	132.99	42.1745	69.3644	74.3615	120.563	94.0016	31.9066	97.9433	168.518	119.8	25.8902	60.4426	49.2655	31.0877	78.2414	139.789	68.9263
2.8	84.5386	102.911	141.021	70.6031	63.5396	69.9964	78.6459	162.306	89.7718	136.299	75.9656	131.461	131.721	34.3097	67.6355	74.4349	107.862	121.332	40.3132	103.445	153.578	118.873	62.5737	67.5735	50.5828	32.8733	90.1034	125.019	69.9801
2.9	80.4083	95.8879	141.134	64.9001	69.8538	70.0186	79.1846	157.294	90.0841	136.953	67.8132	128.518	129.664	40.4441	72.9481	73.5883	111.176	91.6317	20.5323	98.8424	151.329	120.308	56.8003	56.524	44.8613	59.3935	91.4818	138.323	62.6359
3	82.4628	95.5065	143.675	72.8263	71.354	68.8735	78.5909	178.996	89.5435	135.92	68.1472	130.606	133.239	41.0685	70.6198	75.461	111.137	107.266	36.3162	99.7626	150.927	114.44	56.0679	56.6381	60.9441	61.4062	90.8494	142.709	63.8081
3.1	84.7755	96.2014	143.365	72.8158	69.8648	67.6218	83.458	161.081	90.6844	144.187	69.0393	127.632	129.357	38.164	67.7672	75.7929	107.435	125.349	35.1633	84.4465	151.48	124.733	69.4686	52.8176	38.2165	72.7811	96.9569	132.08	69.6476
3.2	90.2703	91.607	137.514	66.9329	66.8484	64.8856	85.8596	167.798	89.1157	141.112	72.004	135.353	127.642	41.5755	75.24	77.805	119.235	111.728	28.8083	98.7264	168.753	137.142	52.2255	58.3322	63.9731	50.9728	96.1096	127.642	66.0991
3.3	90.0033	99.2729	141.658	65.1257	70.3401	67.2819	87.1881	176.544	87.2653	136.371	71.8153	126.104	133.742	43.192	70.6777	77.0652	123.517	118.635	30.4021	95.4589	152.154	131.575	62.6841	55.0372	63.3842	75.468	101.877	140.572	73.2276
3.4	84.9527	83.9961	141.629	61.6848	70.7702	65.6641	91.0699	157.26	87.8271	138.789	72.3209	132.149	131.558	36.2942	67.3207	77.7767	120.089	110.476	2.88665	95.1057	151.62	133.075	47.6372	68.3685	65.0337	37.7239	88.0776	139.402	68.4447
3.5	86.5831	91.3293	139.098	59.332	72.9431	59.0341	92.7741	156.486	85.4843	147.44	71.367	134.189	136.935	40.2812	67.9435	72.6572	129.87	120.409	34.8546	124.776	155.418	139.108	48.0614	64.8248	71.2301	57.1811	97.7559	136.065	64.9635
3.6	89.0152	93.9755	142.498	75.9332	70.1999	70.5863	84.1975	170.908	87.9695	144.683	70.0343	128.083	132.697	43.9722	69.1011	70.6478	126.239	104.591	48.6008	98.2615	160.466	121.327	53.1824	59.7915	58.4677	64.5146	106.712	130.548	63.0477
3.7	83.3348	91.6319	143.771	65.1943	73.3945	70.5533	88.3322	157.777	86.1163	144.239	71.3701	128.711	133.04	46.7151	70.4745	73.5589	122.27	129.345	32.2248	98.4508	148.891	142.093	49.2069	65.206	45.5284	44.6632	110.179	142.729	71.0371
3.8	83.574	98.2957	141.684	63.6434	73.0055	67.5943	90.4701	167.147	85.2826	147.2	73.4208	131.32	132.636	45.9273	65.267	69.0315	130.341	114.287	14.8381	90.7214	162.567	141.223	50.6694	67.6489	59.1057	57.6121	105.502	153.271	74.4991
3.9	81.0413	93.9707	144.645	54.3018	71.6341	68.7274	93.9184	170.397	84.7932	143.804	76.3806	131.926	133.118	39.7358	66.3745	71.8035	128.11	124.231	5.75559	97.8225	150.866	143.192	51.7802	61.6622	54.3825	30.8239	103.365	153.849	83.7093
4	85.4584	91.9587	141.066	66.7122	70.5817	65.5852	93.0911	172.724	83.6022	136.611	69.1528	135.463	132.033	43.8513	67.4969	68.4058	131.509	128.098	34.7603	81.5355	135.162	153.854	60.8114	66.5069	59.4422	46.3302	97.8432	146.191	67.9108
4.1	84.0029	88.4838	143.523	54.5563	70.3469	70.8696	90.0329	162.361	84.4073	146.482	73.4735	133.824	131.695	42.384	62.1993	79.6	124.996	119.677	28.1169	97.6435	141.879	180.012	60.167	72.289	34.302	48.9892	104.31	150.052	67.422
4.2	84.7605	92.701	143.721	69.8817	74.215	70.0129	82.8491	163.892	82.9509	147.161	72.7428	130.151	139.04	40.1039	61.4649	74.4529	127.876	128.007	15.9374	103.493	156.651	131.108	52.0246	69.3753	40.1386	51.8168	111.223	151.267	68.1628
4.3	84.4657	96.173	140.391	64.7205	74.9576	71.501	79.4828	169.002	88.6941	146.595	70.0321	131.573	133.668	39.324	71.2649	73.6873	125.128	126.947	26.1033	102.133	123.802	138.274	61.9309	63.6039	46.7297	42.7713	97.1718	145.397	77.5221
4.4	81.8217	87.0291	141.987	72.5174	72.904	68.6663	86.396	164.508	85.0429	141.92	69.4985	133.767	138.472	42.1813	71.8957	74.4124	134.099	108.417	27.0855	119.741	141.523	143.024	56.8781	77.5704	29.9476	55.8733	104.827	140.096	77.6393
4.5	84.8704	93.102	143.65	62.0143	72.268	69.5033	88.1444	167.44	80.2211	141.931	75.9037	136.592	136.901	47.5972	68.3913	69.2407	124.738	131.278	16.5173	124.644	159.004	140.078	55.363	73.3819	42.7944	37.9816	94.939	138.809	73.1614
4.6	80.1119	98.6567	142.468	61.882	72.164	69.2437	82.3205	168.179	79.0729	139.543	73.8225	137.73	132.569	41.0391	66.6356	69.5102	127.71	128.949	56.2302	102.348	151.018	135.228	52.023	69.099	41.0281	49.4106	103.622	135.427	79.1194
4.7	84.541	91.5324	144.643	63.0637	69.9052	72.6944	81.7361	165.769	83.0067	147.595	70.1391	130.811	139.192	40.06	66.9421	72.1039	119.864	122.831	45.0806	118.777	168.307	146.738	66.8136	83.0479	43.5512	68.4204	83.9549	157.609	78.6098
4.8	84.0108	89.3199	142.602	64.9531	73.7757	70.1209	82.7077	163.714	88.5399	148.041	72.2498	130.002	134.721	41.8936	66.7073	76.0054	125.714	128.339	79.6684	114.906	160.012	119.726	69.3226	74.2487	33.1793	41.7426	101.277	141.059	80.0998
4.9	85.5058	95.6512	143.064	67.189	72.1238	70.7176	84.3978	164.129	82.2493	144.787	73.8059	133.424	140.068	48.1372	72.6882	72.7629	132.919	142.171	35.3923	105.827	156.066	128.883	60.9828	81.3517	20.9627	51.0589	106.036	139.93	84.2894
5	85.7695	96.1803	140.587	56.9068	74.7578	74.3794	85.3722	161.562	85.78	144.959	72.5517	130.898	142.209	41.2061	68.0889	74.9447	127.643	129.542	54.7314	132.571	161.839	168.802	53.3024	76.4675	33.5244	74.0641	87.6255	134.668	85.8859
5.1	77.1163	92.9769	143.432	63.3029	76.7985	73.6345	78.7334	160.728	81.911	143.29	69.7037	131.788	137.363	42.1208	71.6655	70.7736	116.386	129.51	20.9799	117.655	160.077	135.503	59.811	87.0549	15.1684	57.1261	79.4874	144.618	66.8981
5.2	77.4693	97.5005	146.542	58.4331	71.8024	70.8691	84.481	160.692	82.6786	138.489	68.5833	134.235	139.249	40.1729	72.1507	68.128	128.277	132.745	55.8155	108.47	162.318	120.934	60.5933	90.2757	41.1888	60.608	101.941	130.652	79.5264
5.3	82.2361	90.2379	141.631	70.4214	69.8681	77.2123	81.4903	165.865	83.9504	144.692	74.5877	133.872	141.184	49.0352	67.083	69.0451	133.668	111.422	40.3858	106.6	166.68	138.861	79.6791	79.3199	16.6208	48.1088	109.728	139.711	82.7333
5.4	80.632	100.034	144.483	58.6562	74.0073	72.2777	87.4344	166.269	83.6489	146.557	73.6888	133.206	144.533	44.1285	65.903	69.7142	129.084	116.562	31.6013	93.4335	140.054	157.357	64.9029	80.9167	21.8944	37.563	113.881	150.067	71.372
5.5	81.227	93.715	144.827	72.149	73.2635	78.9867	82.7984	165.819	84.0927	138.91	75.9661	131.179	138.894	46.0999	65.4708	69.5631	119.254	121.527	35.6974	79.6134	145.672	149.762	70.2349	84.0817	30.9194	59.1392	113.134	143.506	68.9506
5.6	82.488	93.5546	141.038	54.4118	72.551	76.7063	85.9827	171.191	81.282	142.807	75.3824	130.64	141.274	39.9005	69.7851	63.9065	108.452	118.996	40.3838	112.332	130.134	154.259	68.3279	95.6607	32.1193	51.33	103.475	128.644	86.6107
5.7	83.4182	95.1026	144.499	52.9447	70.9238	76.2818	70.0128	170.125	80.6565	140.559	72.2762	130.957	138.675	39.0998	68.1896	66.789	113.15	126.436	23.0771	86.8001	168.1	148.954	59.0427	67.5308	27.835	56.5073	114.849	147.666	66.562
5.8	80.0904	98.8409	138.239	53.0734	71.1213	72.1659	81.2505	173.916	81.2159	136.996	72.1109	135.083	142.359	41.9336	76.0211	70.2933	105.453	125.278	46.9338	104.237	150.432	168.416	57.6189	87.7626	16.5012	75.383	109.299	135.74	78.31
5.9	86.1366	90.6358	140.427	51.7199	72.9671	73.1492	88.5437	173.657	81.6097	144.376	70.0592	132.427	133.808	37.7256	67.4595	64.707	107.618	118.728	23.4357	105.474	139.361	156.556	50.1355	95.8321	10.5398	39.9054	119.135	139.827	85.0554
6	83.8018	87.3457	140.061	65.6142	73.7609	70.3295	83.4523	172.403	80.3489	141.526	72.9755	129.716	135.595	40.0981	68.0119	71.9955	109.169	108.22	41.7291	89.3646	142.524	126.534	59.1332	74.584	18.3762	37.8837	121.861	138.2	79.0472

## Sheet: Figure 4I
Time (s)	PV-Cre:: MOR								PV-Cre; tdTom
0	0.235261	-1.07794	3.70965	-12.6253	6.80097	1.53136	0.272371	-4.94586	2.04284	-2.13819	-0.852562	1.63773	0.591125	1.03639	0.994791	4.9337	1.97947	-0.393163	2.30675	-0.347642
0.1	-0.55876	2.12346	0.049611	-13.321	1.12907	-0.88072	0.091166	-0.23178	-1.20148	4.46405	1.23402	2.08982	6.89573	-3.55113	0.851853	-1.42295	-1.03167	-0.347565	-1.88815	-0.850052
0.2	0.572231	4.12437	2.43398	-12.1448	3.4687	6.64526	-0.58699	-0.44956	-2.2596	-0.457144	-3.70156	4.88235	3.79426	-2.47187	1.29052	-3.42847	-2.25126	-0.667584	3.02026	0.306147
0.3	1.25882	3.14496	-0.51196	-9.8483	1.48458	3.61719	-2.1909	-0.43295	-0.2025	3.17571	-2.60274	-1.63932	2.96069	-0.962311	-0.919468	1.36575	-3.34005	-2.99545	-0.372112	0.578455
0.4	2.6152	-1.34329	0.496712	-3.4095	-2.27532	1.84173	-1.75587	0.995362	-0.25947	3.89121	1.90405	2.94024	3.23951	-5.19557	-0.167433	0.444797	0.130205	-1.61447	-1.32276	1.14345
0.5	-0.02147	0.362358	0.335568	6.42467	3.99161	1.22388	0.958711	-0.17104	2.60672	2.29177	0.493059	2.19394	1.83046	-2.99894	-0.803479	-0.493916	2.37943	0.534778	4.11424	-2.84224
0.6	2.19247	1.28128	-2.05794	11.5578	2.4109	1.14557	1.38236	-0.30451	2.95607	2.05524	2.60304	0.748109	0.619318	-0.150082	3.50378	1.45639	0.720796	-1.01238	4.42608	-1.82046
0.7	1.6228	-0.08439	-0.41087	4.82959	6.95599	0.355625	-0.58983	-0.47619	-0.884962	-1.50341	0.845387	0.423277	1.22739	-7.84744	2.55687	-2.88395	5.38936	1.93045	4.42613	2.39312
0.8	-0.27077	-2.85766	1.28359	2.42894	1.87873	-4.22814	3.29674	-0.43435	1.28899	-2.72586	-2.42557	2.09618	5.12607	-7.18412	4.23396	9.40924	4.54385	-2.59275	0.80801	0.699041
0.9	0.365896	-2.77766	-1.19641	9.33417	4.74096	-3.86461	0.849918	0.324372	0.183179	-3.43702	2.80545	-0.0601692	2.89874	-1.68449	0.402118	-5.37966	5.86294	-2.37618	0.577678	3.56916
1	2.7468	0.569638	1.37677	-0.1777	6.55168	-2.29415	-1.78504	-0.44071	2.24099	-0.035213	1.43025	1.67179	0.466237	-3.29761	1.33213	-7.72523	2.30706	-1.57038	-0.695178	-5.99457
1.1	-0.11504	3.10656	1.37292	11.6227	0.875384	2.69529	-0.76324	-2.48882	0.550153	-3.36562	0.00529339	5.49595	1.12456	-2.95187	1.833	3.13071	0.811801	-3.03843	-0.17352	0.381239
1.2	-0.03821	-3.11349	1.36213	0.660826	3.78543	6.1388	-0.07324	-1.07718	-1.1277	-2.04204	6.21881	4.62493	0.792918	-3.81095	1.63218	2.82596	-1.25129	2.96378	1.16497	0.0136035
1.3	0.971109	-3.1302	1.67222	11.9244	3.33524	0.581343	-0.43495	-1.31193	0.194419	-2.0562	0.473466	1.39997	-0.919241	-0.462429	-2.62025	5.98859	4.41349	-0.277781	0.390522	-1.39311
1.4	-0.84125	0.904864	0.56389	5.7014	1.67848	0.937641	-1.00157	0.713485	3.14367	2.46231	-0.937364	-0.49788	2.5847	3.02708	-0.824915	4.12877	0.395002	-1.71155	-0.238004	-0.0394672
1.5	-1.25018	-0.8816	-0.71175	3.85685	-4.03815	1.58838	1.9509	-2.47147	-0.764525	0.808072	-0.751335	-3.25554	-2.23719	-4.8079	-0.915626	5.11598	1.55888	-2.95921	2.33892	-0.135773
1.6	3.70618	-0.75553	-1.57648	4.59748	4.25976	2.25151	0.237884	-1.9265	-0.283821	-5.6726	0.087938	-4.24244	0.260849	-0.297179	1.28641	1.54747	2.17338	0.51681	1.50072	-0.864185
1.7	-1.8978	1.99044	0.642989	9.75365	-0.12802	5.01475	2.06797	1.79842	2.88799	-4.77298	1.80575	-1.36297	-0.942234	3.05941	5.00442	4.45638	4.89069	2.87935	1.06512	-0.0983276
1.8	-0.74514	2.68682	1.65982	6.25264	0.63268	-0.24124	0.616493	-0.65674	2.85733	-3.13196	4.2668	-1.3938	2.82309	-1.87288	2.02995	5.50888	2.60622	2.94512	-0.968056	0.772375
1.9	-2.15688	1.77506	-1.64089	9.82873	0.709493	0.251516	-2.33711	-2.59184	0.44908	-0.362466	2.15837	-4.74548	1.10395	0.291576	-2.3431	7.41547	1.71144	-0.195904	0.64415	1.27254
2	0.418333	0.752136	-1.59112	2.88394	0.003297	5.64458	0.418917	-2.49357	-0.127078	2.53125	0.25196	-3.66445	2.69479	-1.22416	-1.82719	-0.836768	7.01394	2.26341	1.47308	0.605645
2.1	0.460408	0.113802	-0.38697	13.2504	-1.28649	1.53899	-0.2438	-2.50229	0.306853	-0.69212	4.05592	0.391343	1.10986	0.0875105	3.15483	1.67026	3.61533	-2.08307	0.941147	0.45096
2.2	0.499114	0.900921	-0.40207	4.5127	0.642941	-1.86269	-0.69153	2.27392	1.02662	2.82972	-3.11502	-0.052013	-1.59557	-0.926803	-2.47402	5.42854	0.714645	1.27722	0.963504	-2.63923
2.3	0.182466	-0.13788	-1.00031	8.0886	-1.28287	-1.88021	2.10624	0.599521	0.132589	1.99891	-1.24876	-2.00278	-0.25569	2.42834	2.17002	2.84108	6.31258	1.40296	0.335055	-0.20181
2.4	1.04839	-1.31012	-0.67167	2.3498	-3.54655	-1.07105	-0.59717	0.119887	-1.01512	2.19605	-3.06701	3.06276	3.22308	0.617589	1.36642	-0.957439	0.627631	-0.106995	0.597634	-0.467112
2.5	0.078159	0.091589	-0.06052	-2.4204	1.24966	-3.4002	-0.40203	2.14037	-2.48122	2.81264	-1.66917	-0.0494593	-3.7542	1.27217	-1.41881	1.24166	0.968505	0.3925	-1.59377	0.572128
2.6	-1.87155	1.63982	0.40299	-18.4704	0.732341	-2.27353	-1.30776	-0.92129	-2.06747	-0.510088	3.12514	0.682598	-2.18621	-0.258889	-1.57971	-4.38533	2.01206	-0.175264	-0.573988	0.240146
2.7	0.396696	-1.61314	0.453669	-0.2741	-0.99626	-0.87329	1.18257	1.74465	-0.581928	5.61808	3.84522	-0.949052	11.2375	1.21059	0.86344	-0.307361	0.120348	-1.59063	-1.35368	2.19462
2.8	-2.60918	-0.82846	-1.29633	4.19574	-2.78838	0.405806	1.15387	-0.67261	-1.43864	4.29348	0.40589	3.68117	-1.74117	-0.648456	3.06204	-1.5715	-2.47509	-2.41306	2.98624	1.94738
2.9	-1.25206	0.153173	1.63309	-5.28175	-0.66417	4.26067	1.14654	0.511626	-1.78237	-2.86997	-0.544499	-2.7372	-1.85586	-4.5137	0.523521	-0.330834	1.30794	1.11229	0.280059	-0.125199
3	-0.54701	-2.03501	-1.26404	7.80561	3.00509	-0.02129	0.270903	0.357523	-0.734319	-1.21787	0.00920108	2.28318	0.205301	0.447585	-0.541127	4.81935	8.10892	2.09214	-3.0117	0.360257
3.1	-0.9572	-1.86154	0.782295	-2.29475	2.59623	3.36255	1.12348	-1.29003	2.48098	-2.08937	1.08568	-1.18053	0.10155	0.114058	-1.75435	0.351336	5.49321	-1.56158	1.89177	0.574089
3.2	-1.36625	0.221365	-1.78236	-1.2879	3.61852	4.45187	-1.86256	-1.20379	-0.916703	1.09426	-1.86798	1.5631	0.0694643	0.130305	-0.555395	-2.94189	4.71863	0.850289	-2.49893	-2.64487
3.3	3.98636	1.34449	0.197685	2.17235	-0.92684	1.59591	0.708461	0.910059	-1.99699	1.14567	0.296905	-3.85047	-0.289749	1.20551	-0.166056	-3.59023	-2.47459	1.33635	-1.69935	-2.19089
3.4	2.39597	-1.39263	1.44222	-5.10665	-0.53254	2.6872	0.755944	0.800103	-1.44521	-2.17571	-5.66336	1.84869	-3.27984	-1.05552	-3.12332	5.79812	0.130366	1.18449	-2.35521	-1.45382
3.5	6.87579	-0.01568	1.72866	-11.151	-1.10551	0.674869	2.88573	-0.36205	-1.42166	8.66987	0.626414	-1.80353	-1.21371	-0.728819	0.0599996	-3.90358	3.56708	1.7025	1.7372	0.33182
3.6	1.32038	-0.69551	-0.70492	1.00242	3.97105	1.39043	-1.27926	2.582	-0.777712	0.853858	-1.26628	5.61803	-0.0433006	-1.38404	-2.55254	-2.4119	-3.16713	-3.40152	0.284404	0.40344
3.7	1.24499	-0.55225	1.07259	1.19242	-1.08317	-5.43942	0.136263	0.888274	-0.395517	-1.3719	-0.0941405	0.463641	-1.68587	-4.00064	0.263784	-2.91766	1.5683	-1.45372	4.08525	2.2374
3.8	5.12742	-0.72832	0.277526	-3.92118	1.92505	-5.20736	-0.55371	0.899504	1.53487	4.79277	-2.43508	5.30613	0.263706	0.046376	-1.7706	-6.99578	-7.11729	-0.534216	1.09895	1.78806
3.9	-0.21269	0.33394	1.28275	-21.5454	2.63799	-0.12487	2.66118	0.902171	-0.543999	-5.05888	-1.02926	3.9561	1.34173	1.14025	-1.76849	-0.905183	2.96482	-2.18423	4.89535	0.148006
4	0.022445	-1.10287	-0.02661	-18.6425	1.38904	-3.11806	-0.26432	3.21078	-2.21613	-7.46025	-1.16456	1.20662	1.73193	2.53571	-2.51915	3.26475	1.47379	-1.95577	0.661626	3.7461
4.1	0.489848	-0.93479	1.29404	1.00557	-0.04541	3.65088	-0.13788	-1.40434	1.36716	1.13801	-2.57545	0.662285	-4.03421	0.404802	0.580873	-4.10613	4.92646	-1.2409	1.42817	1.26498
4.2	-1.26238	-1.84992	-1.40316	1.81969	4.54858	0.169772	-0.25461	1.02062	4.21717	-3.17069	-1.53579	1.11231	-2.79863	-0.824802	0.0188959	-1.8533	-0.389129	0.846933	2.68031	-0.830208
4.3	0.939822	0.270225	0.700564	-1.37341	6.27749	1.07598	-1.52312	1.39036	2.57507	-2.76181	-5.43695	3.0817	-3.97558	2.94077	0.625364	-2.44056	2.05847	1.28383	0.0573385	0.726304
4.4	0.508968	-0.44194	1.22929	-1.69512	0.819983	-1.50077	-2.18348	-0.76397	-1.21113	-2.03801	-1.76033	0.397777	-3.91453	1.73601	2.15714	1.3169	1.53706	0.265845	3.84198	-0.590151
4.5	0.353787	-1.913	-0.73047	0.34511	5.76952	-4.13137	2.19106	0.266338	-2.39198	-3.84944	-7.76322	-2.72188	-3.18329	0.318872	1.54457	-3.35593	2.0959	0.0671638	-2.04623	1.96021
4.6	-0.67408	0.548764	1.39079	0.030262	-0.60135	2.41133	1.36508	-1.77707	0.62307	-5.53389	2.71566	1.23296	-1.49393	-0.293158	0.791021	-3.09953	-0.946681	-1.0271	1.02268	0.697878
4.7	3.00659	2.59002	0.900421	0.015825	0.665755	-1.02822	2.21992	-1.28068	0.685624	-5.31102	2.73987	-0.56862	-0.797681	0.475732	0.0633277	-6.70356	-1.60573	-1.41459	3.17579	1.43125
4.8	-0.91061	-1.97546	-1.40004	3.41301	3.65324	-25.2283	0.377066	-2.07354	0.492512	-0.834819	-3.63244	-4.0275	-3.62628	0.16117	0.245035	-5.45898	-3.28653	0.714914	-1.30266	-0.637438
4.9	1.43615	-1.57494	-0.15027	-5.35355	1.99816	-4.51268	-0.10689	0.820199	-1.33261	-3.12308	0.431448	1.19246	-2.20368	5.44899	-1.74887	-5.63211	4.87668	-2.44728	-0.705985	0.639691
5	3.93552	-4.46057	-1.37745	-3.41751	2.79176	-3.69939	0.745277	-2.07839	-2.5957	-1.76773	-1.60395	-3.90802	-3.93632	0.632764	-1.03057	-12.5121	-0.709702	-0.849325	0.832776	-0.173196
5.1	3.49783	3.49362	5.1391	-6.8995	1.82168	25.022	20.8343	18.0074	4.63478	-0.90506	-0.909629	11.1569	7.22114	0.505291	-0.330425	-8.38076	-2.17291	0.0129647	2.63767	0.80523
5.2	8.08064	10.5629	21.4345	18.3222	6.53084	85.5864	65.9732	62.5465	9.40957	-1.71655	3.59497	16.3539	9.58386	1.50563	2.38835	4.63924	5.91022	6.71209	3.83433	2.05203
5.3	17.5446	16.8938	36.5364	28.0606	17.7399	95.8312	78.3245	73.8425	5.90755	2.25373	11.6424	30.7603	16.5384	2.08478	2.77193	3.20694	-0.975265	5.40509	14.235	4.22164
5.4	23.3036	27.4061	41.5659	31.822	18.1902	93.8207	78.395	81.2287	13.8733	0.805487	13.2534	27.4284	12.2554	5.57868	4.54836	6.8151	5.43305	10.7905	15.0796	9.73978
5.5	23.0665	32.3814	45.1041	41.7806	20.0095	86.8306	71.8591	73.2513	17.4688	2.53986	14.6729	32.9429	14.4208	5.53984	8.94817	5.13369	18.4861	11.4069	19.1406	7.42782
5.6	27.5473	32.109	44.9251	32.0674	17.9254	85.3044	71.9997	71.1491	20.8599	-8.99684	17.3988	35.9332	14.1349	5.41536	7.77204	8.07313	3.00856	17.0361	26.2931	10.4472
5.7	25.4772	35.4945	44.0538	28.1384	19.6014	85.1739	72.1807	69.5483	16.4949	-0.722353	18.4782	29.6712	20.5589	5.15515	9.74945	7.29532	1.98205	14.5568	23.863	10.2389
5.8	26.9359	36.9111	49.1673	41.2133	18.8255	87.8524	69.2621	67.97	22.1181	3.68555	21.6306	37.0642	22.8336	5.49837	11.1522	4.4931	5.84873	17.8645	24.434	12.4801
5.9	28.2848	37.513	45.9192	46.2393	24.2616	84.2699	72.2385	69.3313	20.8844	2.26037	21.0485	33.9062	23.7085	3.46497	13.4436	7.03749	14.1188	20.396	29.7277	9.75503
6	28.9444	41.5088	46.7583	45.0673	21.7342	79.2203	68.4699	69.9439	21.6041	5.05423	17.0081	37.1596	21.9689	8.30644	11.2827	10.8786	1.58626	20.6065	31.6447	9.96007
6.1	24.2988	38.6629	43.8258	56.7794	24.0365	79.3211	69.2512	64.5194	22.1112	-0.264592	20.5559	38.6612	24.1572	6.5957	12.672	9.21394	3.86707	16.2777	31.9724	12.1287
6.2	26.5076	39.3288	45.0517	41.7098	24.1901	78.5564	68.1008	73.0373	24.3938	-6.09135	18.8347	37.3976	26.1259	6.48621	14.8543	7.58813	4.35163	18.6987	32.8135	16.3379
6.3	28.0946	39.0583	42.2179	45.9585	23.696	83.0467	70.5211	76.2896	21.3544	-1.40144	21.4396	42.6053	26.3476	13.7129	13.8935	7.20156	12.077	20.1574	32.93	15.5829
6.4	27.0521	38.0285	44.0876	51.9828	22.5639	85.8764	67.8596	68.8707	22.6703	3.89074	19.6972	42.3555	26.3672	10.8549	13.058	8.431	10.8975	20.9414	37.7134	15.529
6.5	32.3666	43.1577	44.3145	45.1934	26.3251	81.5878	70.0697	71.7587	27.02	0.619821	16.4298	40.1305	30.284	5.9376	13.9223	9.66333	15.8817	23.1011	39.805	15.4226
6.6	27.38	41.6024	44.3051	58.6849	21.9013	87.4452	70.841	73.463	26.598	4.01661	20.2496	38.1158	30.5904	10.445	14.3583	7.33808	8.26837	22.9234	39.4967	13.3742
6.7	29.644	39.7998	46.1032	60.3547	31.0419	88.2985	66.8662	75.0604	23.5764	8.00244	24.565	42.2657	30.0468	6.49348	15.1595	12.3562	7.79706	19.6236	35.0603	17.2873
6.8	29.4869	40.404	47.772	59.5647	26.3041	84.6683	69.0937	76.1399	30.431	10.1109	25.9449	38.5186	29.8143	15.694	16.948	12.6866	8.24491	22.5987	31.3558	17.5516
6.9	30.5631	47.117	47.3867	58.4504	24.1644	84.6502	69.5846	69.3112	22.982	5.14967	24.7905	37.9545	30.1742	14.246	14.1767	11.2516	14.8964	22.9444	34.6926	15.7096
7	32.2417	42.4301	46.5768	52.0797	27.7702	84.4052	70.7656	71.6893	26.9031	9.10841	25.0213	37.8537	28.7026	14.0623	14.2053	15.2853	15.4012	22.7858	35.7925	16.0036
7.1	31.5826	42.93	48.4037	63.4092	26.0258	90.2717	72.0019	73.8478	31.4385	8.81926	21.1799	37.9925	31.284	17.4233	13.2471	9.58501	18.2541	24.3176	33.1267	17.4682
7.2	30.8832	43.7482	44.9029	59.0901	21.6209	94.783	70.0779	76.8766	28.0224	7.22536	24.7614	42.3246	34.3964	13.0986	14.6302	16.045	12.7844	24.1051	32.0137	16.5782
7.3	34.981	43.8802	44.8751	59.0911	28.4246	83.5733	68.8674	75.5657	29.7547	7.62509	23.9419	38.1616	33	15.7217	13.8038	15.8973	18.928	25.5515	35.2567	18.3661
7.4	32.0971	44.3663	47.6502	46.2118	26.7057	90.3584	70.9853	74.141	27.7082	0.723996	23.8533	38.0276	33.3763	11.9478	17.1474	16.311	9.46146	22.0906	34.9631	17.1665
7.5	34.5931	44.6982	44.8736	53.235	24.5266	81.2203	74.9127	75.4375	30.1995	8.74182	31.2948	38.9801	34.8894	12.0542	16.2586	17.8651	14.3415	24.518	34.1263	16.2934
7.6	32.7735	42.7733	47.7296	50.686	27.1789	89.1656	73.9728	71.3367	26.2322	12.1895	24.6448	40.2461	30.4299	13.3386	14.9962	14.6642	16.1808	26.7642	32.7426	15.8129
7.7	33.1974	46.8278	44.9596	55.907	26.0227	88.6097	73.2351	77.8849	32.4409	8.08224	24.6923	37.343	35.6381	12.3415	16.3542	11.4189	11.2019	27.6339	35.7977	17.8167
7.8	37.1245	46.6414	48.0404	61.3444	25.8917	86.6342	72.7692	76.8012	28.6642	3.72151	22.7537	40.7731	35.4198	12.7083	16.9669	14.8242	14.4496	26.4607	38.4417	18.685
7.9	32.9318	48.5306	46.1719	35.453	30.1392	83.8318	73.0488	76.3015	31.1581	1.44355	24.5347	37.8385	35.9138	12.9869	15.4654	13.6396	7.73089	25.9249	38.5865	20.995
8	34.2438	51.3315	48.7544	54.9756	31.6523	82.587	67.8432	75.965	32.128	8.71818	20.4498	33.8997	38.5878	15.252	16.6805	14.9086	11.62	24.5399	36.666	17.0326
8.1	33.1817	49.9389	46.4189	46.4478	27.6021	88.2137	71.9038	76.0758	30.016	7.05195	24.4898	35.5845	45.1485	15.0904	18.1307	8.60324	12.2869	26.1618	37.6344	16.91
8.2	33.4737	46.6497	46.6102	45.8562	25.2628	85.8792	70.4764	72.1741	32.1053	3.99723	25.9568	39.2895	32.8831	13.0482	17.3999	10.0671	12.9961	27.8956	37.9391	17.0958
8.3	32.9134	44.8095	47.9159	48.6959	26.9638	93.5217	69.0079	74.5438	31.8393	6.54692	25.6157	31.0505	34.6804	15.5328	15.9524	11.7202	10.7274	24.3715	36.4668	19.4432
8.4	39.4483	45.4913	45.1996	49.2186	25.1909	100.656	75.0968	77.7818	27.1918	6.79327	30.032	35.4951	35.8717	14.2655	19.4553	7.51112	14.0135	26.2916	35.1372	19.4726
8.5	35.3572	48.5055	45.13	48.0646	28.1478	95.351	67.9661	77.9667	32.9255	4.14269	31.2618	39.8796	35.1327	13.8855	18.4048	10.7332	9.52611	23.8115	34.8145	18.3495
8.6	36.4969	47.5629	44.651	39.5265	28.0446	95.8351	70.1329	73.7061	32.3415	14.103	25.6697	37.8765	33.9163	13.0478	17.3306	10.2902	12.3926	25.9892	33.9663	19.8438
8.7	37.0499	48.3587	45.0339	44.3665	27.8624	92.0993	67.7677	73.5229	30.8071	11.3066	29.7903	42.2128	36.803	16.7574	20.8291	10.923	17.1604	21.0566	39.5297	19.716
8.8	32.1991	48.9281	45.8767	34.0715	24.7782	90.8874	68.3652	71.9544	32.1885	19.9815	28.8195	40.1323	30.0283	17.3867	18.6222	8.32165	10.4694	25.4012	35.3787	20.0897
8.9	33.5579	47.2479	46.7298	49.8152	26.4843	88.8676	68.507	74.647	35.6576	8.87669	26.5424	39.1427	32.3249	15.295	20.4037	5.25763	12.806	26.5946	35.0955	21.1405
9	36.7834	50.5078	44.9576	47.5399	26.7654	90.5216	69.0187	73.2554	32.4903	13.7271	33.2499	40.5905	42.337	13.3687	19.1787	8.40819	18.5759	21.9772	33.7759	21.5409
9.1	35.9357	51.0336	47.2366	50.0147	28.2405	88.9678	68.6404	72.7663	32.4821	5.26194	29.5089	40.1487	33.9853	15.0011	21.8341	3.80437	14.3277	19.9361	36.2714	16.7786
9.2	34.5973	47.9392	45.5286	45.8537	30.8982	81.0963	72.2699	73.7143	33.2935	13.999	27.2051	40.7108	30.3312	15.1973	22.6419	10.3305	15.201	25.5677	32.7687	19.9459
9.3	33.6679	50.059	45.4903	63.2551	27.9787	85.0227	69.5395	71.8207	27.9455	10.1291	26.7361	41.8047	34.8276	19.9842	19.8941	4.16863	12.0661	27.5206	35.0406	20.7502
9.4	37.6182	49.2762	45.703	66.4587	29.5158	84.8932	70.4638	73.8959	29.2347	7.92586	23.4339	35.1267	39.4665	16.2782	20.2946	5.4913	9.42112	28.5622	37.6381	17.9007
9.5	36.8686	52.3168	45.4593	65.7341	27.2476	88.7442	69.0359	69.3179	30.4801	8.95322	19.9677	36.5358	37.5616	17.6155	21.0884	7.75484	14.8326	28.3749	35.9924	17.2934
9.6	36.7394	46.5867	46.607	65.1316	29.8298	96.8744	68.9309	69.1509	29.8453	10.1286	28.1737	32.6386	38.6894	17.1372	23.9925	8.05579	12.874	25.9524	32.2651	21.7227
9.7	35.6831	50.0844	46.0336	65.3868	29.2586	90.8434	66.6599	67.2763	31.7113	5.78793	21.7702	42.1609	37.3588	14.8084	16.9373	6.98126	14.1725	28.8051	37.0358	16.6943
9.8	34.4995	49.2983	45.0599	60.6162	25.0511	94.8314	65.6728	71.6414	31.4209	11.7714	26.1434	37.7297	42.2401	14.4513	22.0116	4.13865	18.9067	27.413	34.0447	19.6408
9.9	38.7251	47.1886	45.4005	64.4081	26.2903	89.5263	66.8489	74.5672	29.7781	5.87786	26.4538	34.953	39.2656	12.5744	24.0355	2.64347	10.0086	29.88	35.0697	21.3326
10	35.8468	47.3432	45.7406	60.212	25.0438	92.2166	69.4756	74.556	27.1425	10.466	22.4134	35.7462	31.7357	14.8311	18.7063	4.6089	9.50154	30.5637	34.6617	19.8257
10.1	33.071	46.8902	44.5254	49.9696	24.8269	90.7123	68.2371	71.3737	30.8002	0.845649	20.5846	39.6479	46.2872	15.7043	18.0686	5.56432	16.8539	28.3839	33.9081	17.5306
10.2	35.4594	44.1897	44.548	51.9247	26.8897	93.0952	64.3726	71.4131	28.7344	12.2231	25.6468	38.4458	44.309	17.893	20.2274	6.10937	15.9748	25.1108	37.8091	19.4041
10.3	36.1397	46.4462	44.9081	68.0934	24.8461	91.8556	65.8899	71.2499	31.3397	10.548	24.5389	34.0989	34.3936	16.6109	22.0459	7.55814	10.302	26.3565	33.9185	19.6809
10.4	32.9572	47.4312	43.4535	59.5109	24.5436	89.0538	62.8066	66.849	32.1016	10.3457	20.1991	35.7956	36.174	14.4159	16.4145	7.68465	16.3316	27.0598	32.9225	19.5722
10.5	34.539	45.0602	44.0563	52.804	23.6959	87.1591	65.3503	71.803	31.0992	13.2195	25.2744	39.8422	36.8004	14.8395	21.6796	7.16244	8.13925	30.5847	36.4391	17.5371
10.6	33.7236	46.4114	43.379	52.0614	24.698	86.2984	64.1082	72.1097	26.7619	11.8167	27.2492	38.4435	39.5986	18.4339	18.6238	5.69208	16.3225	29.0284	34.2065	18.7053
10.7	36.1115	47.3946	44.8156	47.3752	26.4911	80.0777	61.1582	67.2856	31.5677	6.41384	17.984	39.0033	38.5205	14.4344	19.4482	6.45929	13.1535	27.5219	31.5104	21.7404
10.8	34.1397	44.7191	45.0811	59.7042	28.8757	80.9192	67.1833	70.4873	24.4409	12.5235	20.1044	32.7756	36.3899	22.187	19.9947	9.8605	17.3147	24.4071	34.1456	19.8368
10.9	36.5234	46.6779	46.6475	38.8258	22.9903	85.2812	64.7873	66.0279	30.5667	9.25147	27.4533	39.0693	35.5827	20.1644	17.7726	6.85572	14.901	28.51	33.7293	20.6364
11	34.3654	45.7324	44.5528	42.7812	25.4248	76.9947	60.3859	68.4628	28.4542	16.8958	26.385	38.2612	34.7197	22.9818	18.8922	8.95418	19.0262	28.8651	35.624	21.9107
11.1	33.7598	47.4246	42.169	28.6372	21.7083	85.4957	62.826	68.732	32.9658	9.22365	24.6154	34.4078	34.2273	13.1658	18.78	11.623	15.2885	30.6048	35.7506	19.6827
11.2	35.9962	47.4313	46.3544	50.3863	22.5831	84.2785	63.9754	67.9595	27.4216	16.8451	27.5133	39.149	36.0918	16.8158	20.3525	6.039	9.35655	29.2706	36.3658	20.189
11.3	35.0671	49.8064	44.874	46.9618	24.052	80.7634	65.0695	66.9115	29.6056	9.03267	28.4846	42.5068	40.0559	15.444	17.0208	5.60824	19.7378	26.4346	36.9596	17.9088
11.4	33.2807	45.291	43.7411	44.9022	22.3406	76.3714	63.4615	69.3373	27.2575	5.07643	23.7297	38.1818	41.1312	6.05019	20.5966	7.51168	20.4128	24.1693	34.6735	19.0628
11.5	31.5905	47.1387	44.8834	47.4529	22.1698	82.2894	59.8871	66.7152	26.5145	6.39219	25.722	36.3505	37.8699	5.41146	19.1773	11.5426	18.3735	30.2225	36.3408	20.7526
11.6	33.4185	48.0113	44.1955	37.6029	26.5886	73.1712	61.1708	69.5792	26.9395	7.85981	24.3961	37.8527	37.5733	6.14464	18.9764	14.0715	17.7385	25.002	34.1564	18.0679
11.7	33.0597	48.6319	44.0716	46.3288	24.8139	78.5833	59.002	63.124	29.41	11.3438	24.1969	36.2792	35.8756	10.0606	17.5395	4.50063	17.9254	27.9577	32.1202	19.3011
11.8	34.1489	45.4849	42.5534	36.4537	20.8067	74.1101	60.665	68.232	28.4061	16.4193	21.6951	38.9749	40.474	5.48635	20.6725	3.45808	18.1289	28.7232	31.0561	15.9658
11.9	28.8815	45.4813	42.9045	42.1317	23.4748	69.3852	60.7124	64.8177	33.0053	11.7396	22.6196	36.3497	34.0964	8.31046	21.281	5.43721	21.1554	28.8264	30.6696	16.1931
12	30.9847	46.5723	45.2717	51.7469	21.0108	76.6869	62.5945	62.5126	25.2299	7.96811	21.3017	28.6087	33.3735	6.45639	18.417	5.66279	15.1731	27.3303	29.8812	18.6585
12.1	30.32	45.3983	43.0222	60.5634	24.0426	78.3467	58.9815	61.6311	24.1057	5.84553	23.4204	36.7502	35.0345	4.86456	21.3626	6.7813	19.2913	26.9611	33.3581	16.2717
12.2	34.6927	43.5062	44.543	47.9639	21.5049	55.1938	60.1187	65.0864	27.1729	20.9371	25.4641	32.7985	36.4132	3.85414	18.1936	7.53559	15.1861	25.5603	33.7009	17.5608
12.3	31.8666	43.9228	42.298	46.4314	24.4865	81.3284	62.6624	63.4953	24.7601	13.8086	22.5349	35.2335	36.8615	-0.350109	20.5599	7.65762	15.612	28.9745	34.3017	21.0064
12.4	31.3669	45.146	45.6245	45.9857	18.5811	80.2673	59.9713	58.9837	24.2137	7.86451	22.5058	33.3958	34.0688	-1.06719	19.9158	3.91559	16.382	26.226	33.766	20.2893
12.5	30.9848	44.8121	43.8541	49.7065	23.2644	82.153	60.0159	61.59	26.8102	14.1305	20.7596	33.7243	38.6866	-1.15932	21.7012	7.38619	16.2752	25.7488	36.0903	19.9138
12.6	28.0842	40.5666	44.0746	57.4163	25.4038	81.27	57.444	62.0581	26.3329	10.7872	26.1836	30.6851	38.4262	3.22542	18.8262	11.0367	12.324	29.385	35.1821	18.7417
12.7	28.1308	44.8335	42.8488	55.8174	22.4917	75.7745	59.9143	60.6249	25.1955	11.3103	25.5656	32.1363	38.8043	1.99136	18.6232	7.7103	11.8015	27.8171	31.8528	20.9432
12.8	28.6575	42.7461	41.1423	42.4056	23.0507	72.7447	59.0557	62.3036	29.6874	9.424	22.9961	30.6993	39.0314	2.37853	17.807	9.15832	9.52794	24.1234	36.5708	19.2376
12.9	34.6037	41.858	42.4503	45.8097	22.1665	67.0237	58.1035	61.3042	25.5439	14.3028	24.8618	37.5681	44.6893	-1.68294	18.788	12.5451	16.1495	23.0719	33.6804	17.94
13	32.5041	45.0258	44.1498	45.489	23.8285	73.8579	59.2188	58.5325	23.7953	9.41783	20.7787	33.6189	44.8536	-2.62264	17.7479	14.0602	15.7695	20.1933	34.2432	16.1827
13.1	29.0087	43.1739	42.7007	48.4049	18.8629	69.4889	55.2446	59.8832	27.6996	10.9405	18.2065	35.9851	34.1025	0.925548	18.8212	8.07321	15.299	23.3024	33.8975	19.7031
13.2	29.0475	39.807	40.4834	51.6223	26.378	69.6992	55.0519	56.8078	30.4817	12.1764	20.176	31.007	35.1963	0.600885	17.192	9.65731	12.4173	26.3162	32.0352	15.7787
13.3	29.0458	41.6345	41.6785	60.2591	22.1835	74.6693	53.6866	59.1685	26.1219	5.41137	24.2547	31.7989	37.9531	-1.07916	19.195	7.62263	14.2614	22.662	33.0548	19.0762
13.4	28.3343	43.1018	41.1432	57.3025	16.5749	71.5899	55.6927	55.6392	29.537	5.85506	18.4174	32.0235	39.6601	-4.61093	17.1618	9.66182	14.9544	19.2329	30.0521	18.2171
13.5	29.0133	41.6988	39.6798	50.013	20.5002	67.8005	54.944	57.3763	21.4115	2.939	16.899	40.8348	37.1804	-1.94375	17.6835	10.1554	13.6668	22.7321	32.9226	21.0441
13.6	30.1564	43.4614	39.938	46.1875	20.284	76.3924	55.2869	57.9347	25.7832	-0.855014	21.6187	36.7561	35.7386	-5.35416	17.2129	9.53262	11.1758	20.8129	33.8542	16.6325
13.7	31.3606	43.4186	43.1355	46.3093	22.7846	56.4096	54.6555	55.9172	28.9973	4.60243	24.773	33.7802	36.4194	-4.54236	17.9248	9.0513	19.3012	20.8844	31.3165	17.964
13.8	30.1007	42.9664	39.8492	38.9276	20.7746	66.1741	54.9231	59.0888	26.483	8.39722	22.6789	32.7826	36.7191	-7.86933	16.4797	7.61409	17.526	22.0581	28.3528	17.726
13.9	28.9069	44.5954	43.2742	53.2292	22.3111	63.8803	51.7059	57.2722	28.9958	3.57285	19.2914	33.6358	31.9537	-3.95713	19.3981	5.08816	16.0566	20.5572	31.8386	19.5773
14	30.9485	42.5252	38.8404	50.2803	19.8632	73.5905	55.0223	56.1891	27.2497	6.13531	18.9775	31.202	30.5027	-3.95355	17.1232	6.74846	17.5292	20.2951	30.3691	18.7729
14.1	29.7849	43.4694	39.4315	38.7585	18.2268	73.5324	55.0481	56.57	32.5866	4.3684	20.7396	29.2606	40.9644	-1.03619	17.9425	6.14306	9.89515	23.2375	30.7162	16.09
14.2	25.7956	43.2927	38.9543	54.7394	19.3628	73.8588	55.0732	52.705	27.8321	9.70435	21.3695	28.3263	42.8997	-5.81665	18.86	3.34208	16.7551	22.1875	29.9495	17.7992
14.3	27.8673	42.9083	38.0712	43.021	20.3062	74.6813	49.8567	51.9942	29.5498	16.4069	19.0837	30.1838	30.7745	-2.77226	20.2451	10.5969	15.2105	20.7237	30.0963	16.1815
14.4	29.58	36.2306	37.9603	51.1762	19.7822	61.6541	49.3492	57.8237	26.5918	5.92314	15.3736	25.7444	41.6565	-3.39625	17.5599	10.3728	18.6838	19.7514	31.254	16.291
14.5	28.3558	41.1182	35.915	42.6794	22.6092	66.9817	53.8486	55.8519	27.1	2.6094	16.2892	32.4622	31.5481	-4.18112	17.1455	9.87543	12.8854	20.3466	26.7462	18.153
14.6	28.8691	40.773	40.5281	52.3475	16.1828	67.1409	52.3179	54.0591	29.915	2.55547	21.0145	39.8927	40.8024	-2.28631	18.0395	8.64114	15.5868	18.9946	26.8559	16.686
14.7	26.1582	43.8213	38.1334	31.4211	20.2225	64.0269	50.196	53.7516	28.0506	-1.0187	16.8003	35.5699	38.4415	-1.66888	17.3099	12.8784	9.95258	21.9705	29.4194	17.8551
14.8	28.8805	41.5075	36.2549	41.841	16.8466	59.3504	54.3076	51.4811	27.812	6.39383	20.7769	32.8593	36.9734	-5.51517	15.7804	9.03732	10.6446	20.7294	28.2175	17.0254
14.9	23.8996	38.8752	39.5586	52.8501	21.1033	63.8391	54.8965	52.3414	28.4895	10.1266	20.5651	31.8697	38.504	-3.47359	23.4719	10.8054	19.4142	19.5763	26.9299	16.4021
15	26.9359	42.5417	38.8026	41.2313	18.7325	59.6997	48.353	52.0174	25.0943	5.01909	21.4839	33.1655	42.1338	-6.99101	18.6772	9.79129	17.7134	17.9764	29.8761	17.4593
15.1	26.8868	39.0852	36.447	35.622	16.3237	62.1764	46.7188	53.5605	28.9503	7.83355	22.9522	30.8545	38.7304	-4.51073	16.541	11.4114	10.6168	18.2512	29.432	17.4002
15.2	28.9147	38.3758	33.3782	41.5291	18.1727	64.5977	49.3549	51.5543	28.7299	6.64392	18.0789	35.109	43.8546	-8.48547	20.7867	8.44617	17.1127	17.2969	26.3945	15.4405
15.3	29.8155	39.537	36.3801	43.5857	17.2621	62.6423	47.6832	52.7841	30.7847	10.6816	20.6852	37.7852	37.907	-5.44833	17.1305	5.39938	12.851	21.1465	27.7335	18.4357
15.4	30.2556	38.9422	35.3381	32.9858	21.1696	59.0789	45.518	51.9738	27.462	11.9965	18.8936	31.2448	35.7728	-6.7207	18.3505	12.2583	10.6569	18.3453	27.4995	16.2378
15.5	25.8033	37.5608	35.4561	30.7835	18.4367	61.1144	44.7266	54.6163	31.5032	9.74725	20.2738	31.6797	35.8897	-5.7319	19.6388	9.31977	13.3345	19.5461	31.2287	16.167
15.6	27.9899	32.8152	36.4004	36.6737	16.1105	53.3263	46.6634	52.0358	28.1044	9.6973	23.0504	36.953	40.7879	-4.99707	18.1615	5.89727	15.7506	19.792	26.5877	14.5476
15.7	25.6284	37.7359	34.3021	26.6793	20.0552	52.7756	45.3435	49.1387	31.8279	4.40435	20.9008	31.4098	37.9559	-5.1112	19.1083	14.0502	20.6251	20.1563	23.3739	16.3917
15.8	25.1901	37.267	33.6214	27.2405	21.3264	62.9129	41.6447	47.7841	30.0401	8.10662	21.1248	30.1774	32.6745	-8.28373	18.4246	8.92708	9.34266	22.7521	24.0581	19.6302
15.9	24.1723	35.7033	36.101	35.6765	14.2339	62.7013	46.5018	49.1609	26.1108	1.65478	20.8383	30.3337	37.2072	-8.92559	21.2504	11.8736	13.4384	19.3681	26.7817	14.7725
16	26.3106	35.4053	32.8916	36.231	12.3031	52.2226	44.7968	47.5316	28.6674	15.7205	18.2722	34.5538	43.7103	-5.52861	18.6018	5.87968	15.2714	24.2602	24.9748	13.8464
16.1	26.1575	34.5985	32.1016	37.9347	16.15	55.7985	46.004	48.4049	28.9836	7.37873	19.2806	29.7319	42.0354	-5.46823	19.1608	8.7531	14.4554	19.8241	30.9567	16.7135
16.2	26.0812	32.6578	29.2304	25.83	15.761	48.3571	41.6129	46.2498	26.2699	0.0700681	16.1108	31.8114	44.8829	-1.25003	20.0612	3.61276	16.4913	21.2412	30.3873	16.6613
16.3	24.676	34.6217	30.4782	37.173	17.7072	59.8502	46.5683	48.6753	29.1451	12.1065	20.5436	31.2346	41.4363	-6.91392	16.7055	8.09262	12.7835	19.1928	32.5973	17.1028
16.4	23.9039	33.5723	32.8643	34.0504	18.3451	49.3558	44.02	47.7302	24.9429	9.53016	19.261	32.9999	35.9594	-8.38506	17.225	8.13189	19.3815	20.395	26.8958	14.2924
16.5	23.5209	35.8514	34.2844	53.5414	17.677	45.6162	45.0457	46.4989	25.7667	6.42378	17.4449	32.0545	31.073	-7.4839	20.8305	8.04838	18.1674	23.5127	29.8839	14.2469
16.6	22.6296	34.1267	31.0146	58.807	16.6671	50.2488	44.1773	47.5121	23.498	11.759	17.1584	31.453	32.0871	-6.80415	20.0245	6.74	13.9615	20.6847	27.6534	10.5559
16.7	24.7669	35.6451	31.0128	52.369	19.0926	54.8548	45.0698	50.926	25.8342	6.40654	20.5089	30.1022	34.7037	-4.97479	18.689	8.65004	19.8043	19.8293	28.9775	18.4871
16.8	25.5464	35.6665	31.6319	54.5984	16.7359	50.9447	43.0761	43.6247	28.3168	9.3116	18.9126	31.252	33.2515	-3.1273	19.0399	6.31224	12.2922	19.4178	29.6882	17.6093
16.9	24.5602	36.4773	31.347	49.7581	18.3268	53.0566	42.0711	45.7599	31.2863	4.74838	20.2898	28.7309	37.9595	-3.06714	18.9612	4.88485	12.963	16.1582	29.2267	17.6081
17	25.1654	33.2403	32.125	47.0014	14.6367	52.8615	45.1091	45.408	25.0921	4.20329	14.8153	25.3044	37.5938	-0.840385	16.3708	7.8904	19.8748	20.4902	27.9049	8.02968
17.1	23.2676	38.5072	34.0009	43.8441	17.1433	39.7399	40.239	47.3028	25.7168	10.4099	13.1653	31.4632	37.4598	-3.82888	18.9384	2.0316	16.1492	21.3662	28.2617	11.0136
17.2	24.1801	35.3287	31.805	44.7131	17.1555	51.414	39.9198	41.948	21.9566	7.1746	18.6607	24.9817	35.6906	-4.52789	17.7349	9.00001	16.4916	20.775	28.1326	14.6535
17.3	24.5065	34.151	31.4358	44.3275	16.9308	51.9563	39.5133	45.0836	22.8299	10.7645	16.4459	25.5309	33.9897	-2.46629	20.1188	4.36853	18.8118	18.3198	26.081	11.2058
17.4	24.087	33.0126	30.8204	41.7491	16.6866	51.7562	41.1533	44.2278	26.3812	11.2073	16.7791	28.3623	37.3358	-5.4864	16.8559	5.73452	14.6576	19.5094	29.7874	14.9838
17.5	22.4944	35.493	31.0986	51.6583	18.1209	57.387	41.6595	43.6971	24.6052	5.79262	20.8529	27.0955	31.9796	-8.84012	19.9903	14.1393	15.5075	16.8558	20.8551	12.6588
17.6	23.7834	33.8873	31.4071	39.79	16.5079	46.821	39.3594	44.8906	26.4807	8.35258	15.0316	24.6485	36.8812	-7.97561	17.6207	11.067	16.7757	19.0911	23.2532	16.6437
17.7	22.6779	32.7141	29.1709	31.4384	19.7834	44.3914	34.8637	41.842	25.9216	8.10779	17.8635	24.7412	33.0256	-6.71311	18.0768	6.49943	13.5761	18.0561	24.2917	9.26811
17.8	23.8468	34.9899	32.1348	29.6434	15.9468	55.1349	37.567	43.2049	23.2468	1.46568	13.4295	18.0668	32.4155	-12.2757	18.823	8.68376	8.96572	19.8668	23.8956	15.592
17.9	22.7304	31.9119	29.6824	49.0107	13.2894	51.4241	35.7081	41.9539	22.316	5.26366	15.203	30.631	38.4299	-6.48551	19.4937	6.35223	9.4545	19.3626	25.9018	13.913
18	21.2425	31.5266	30.8244	29.8545	19.5452	53.3764	34.9325	41.6486	24.0915	8.27421	16.9722	27.1133	31.7769	-9.30091	17.7038	3.72973	16.169	17.364	24.2202	15.297
18.1	24.1808	31.1471	32.9033	34.9431	12.1535	48.2709	39.0316	40.9177	25.5711	6.07064	16.2742	25.1158	34.2575	-6.72798	17.9856	6.84454	15.6094	16.79	23.0232	12.2011
18.2	25.5241	38.1801	26.8377	37.8236	13.9398	44.4785	37.2537	43.3751	24.753	2.74186	16.9198	26.7205	37.7681	-3.96599	17.2579	3.23781	10.9784	17.2837	26.001	10.7364
18.3	20.5646	31.8219	27.7542	28.3555	13.779	47.672	38.3795	41.6436	24.4315	8.9378	13.004	27.0467	31.4952	-4.06557	18.1922	4.59413	20.7812	17.182	25.1697	13.9133
18.4	25.1004	31.9483	28.4687	44.5587	14.4735	46.538	38.7531	40.0008	23.9451	9.39623	16.6695	23.4867	32.4849	-8.092	17.4021	7.26564	16.5628	18.4859	25.8107	15.4722
18.5	21.8961	29.8442	27.6871	40.9721	15.5246	41.4487	35.6734	39.6699	24.7869	3.87929	14.8741	24.2643	31.6929	-10.643	16.1472	4.52607	12.1859	20.6854	28.9962	14.2786
18.6	21.2537	32.752	26.5296	39.6085	13.5659	48.5993	34.1487	39.2237	18.6683	9.71736	12.0661	23.2302	29.303	-10.36	17.1951	7.74825	14.0449	19.3709	24.3369	11.6616
18.7	23.6805	31.7635	31.2872	43.4554	14.7398	33.714	34.9516	41.589	24.6087	-4.80298	14.5588	25.8024	39.615	-6.16236	15.5351	6.44767	16.1503	19.959	24.2523	14.2044
18.8	24.8718	31.2292	26.0139	13.9223	17.9129	52.8024	33.9672	39.3053	21.0734	4.75571	16.1662	25.773	35.9314	-7.85081	19.0181	8.01486	12.4917	19.0095	18.7724	13.198
18.9	23.435	30.9918	26.8454	39.1166	13.3532	46.2339	35.628	37.2625	21.1809	5.74968	13.4178	23.8717	38.0383	-7.11203	20.935	5.06395	11.9015	16.3033	23.1344	13.2038
19	20.8579	28.5709	27.9322	28.2278	15.8012	49.2937	33.7964	37.8946	20.8589	-1.94939	13.334	25.9902	32.9654	-10.9406	19.6616	15.715	14.3455	17.9321	24.7836	13.5236
19.1	22.8407	29.8888	26.9256	33.8805	15.8228	40.3175	35.3157	36.2175	19.9037	9.81291	8.13838	27.6569	36.8251	-7.14541	20.2194	9.60278	11.2105	17.1886	22.1041	15.1684
19.2	24.5997	30.4283	25.93	42.7005	10.8126	33.9138	31.3562	36.876	17.0951	1.32519	9.88492	24.3263	34.0457	-4.7081	18.8149	5.52368	9.67149	18.5009	21.3629	15.5443
19.3	23.0375	28.8371	26.2474	30.6032	8.7012	44.0592	33.5063	38.7116	25.1516	2.50987	10.819	23.0444	34.5547	-10.3491	20.3306	10.0222	13.3309	17.2313	21.7328	13.3221
19.4	23.0999	31.4018	28.4996	7.17948	17.3162	44.5971	30.8075	35.4543	20.7959	7.13953	10.0891	24.2951	32.9457	-2.45695	20.665	3.35175	13.7303	21.6787	19.6691	15.1895
19.5	20.9164	29.5143	26.8043	28.2038	10.2386	43.2484	31.175	40.5382	24.9769	3.03942	10.644	28.9341	39.3546	-11.1356	20.0929	7.63719	13.8155	16.0278	20.8219	12.1231
19.6	20.8517	28.1136	26.3722	23.4324	14.2735	35.4011	30.5599	38.9603	26.1224	1.79504	9.37679	28.6492	36.3925	-6.29115	20.1191	1.10921	15.7328	15.5327	13.5522	12.0936
19.7	19.6417	25.9065	25.5892	24.3196	14.7925	35.2314	33.7239	37.729	19.2438	14.3585	7.19152	26.3856	38.948	-8.61503	20.5831	12.1698	12.8585	14.2541	20.7225	14.1761
19.8	24.5057	30.8553	27.0127	36.1206	13.9142	39.8985	32.6488	37.2505	20.8295	6.54488	8.1872	24.9437	29.121	-9.13497	21.7722	5.83563	11.9044	13.3184	18.2274	15.6232
19.9	21.3349	29.7869	27.3021	25.8829	13.9207	30.7804	33.4659	33.6909	23.0679	-1.91517	9.24297	24.3429	37.9501	-7.0278	18.4016	3.89902	11.3268	14.4911	18.5452	12.6868
20	21.8371	29.9242	24.9336	16.2201	11.0429	34.5136	33.0972	36.209	22.1617	10.1592	5.56346	25.7069	29.7544	-10.2027	22.1008	7.9138	10.2934	13.4756	16.8062	13.8073
20.1	20.6389	26.9028	27.4483	24.3041	14.0803	35.1701	30.6786	33.5963	23.7489	8.7554	14.5432	28.5501	31.0128	-5.35073	18.8305	-0.398352	10.8206	12.6578	15.5442	12.303
20.2	21.0139	26.34	23.829	23.5522	14.676	30.532	29.249	36.9919	24.9952	7.32643	7.48043	27.9595	31.5918	-8.85004	20.1277	7.13614	14.2476	9.48057	17.9526	12.0426
20.3	20.4781	27.7464	25.0025	11.9151	5.57026	33.4483	31.1267	36.5307	23.4215	3.3276	7.95426	24.4652	33.3041	-9.03152	19.9385	4.13109	12.9478	9.27546	14.7634	8.06928
20.4	19.7166	27.2291	23.9688	23.6137	6.34153	38.4779	30.6213	32.0564	21.6523	2.40641	10.0685	22.1979	31.348	-9.44677	22.5338	13.3178	10.3149	11.9475	14.7957	10.654
20.5	22.9983	27.5674	25.9997	19.1178	12.7904	37.6315	31.9671	33.9166	21.5527	7.42172	11.1236	28.6031	27.5055	-6.27386	21.0507	3.04418	9.2221	13.9186	16.6385	11.3285
20.6	18.3834	25.4945	24.9687	18.1275	12.665	36.5513	32.2123	33.992	21.387	5.79627	7.59469	30.4796	34.9903	-9.48811	23.0736	4.10816	11.4011	10.7548	18.4785	9.68565
20.7	16.9621	27.4286	26.0755	13.9666	14.8885	30.8583	28.505	29.537	23.7787	5.67393	7.61053	23.137	36.8607	-9.66974	20.4562	5.13562	14.1468	13.2989	18.4331	6.98606
20.8	22.3235	25.9876	23.6372	20.9039	13.2967	21.5896	30.6158	33.3839	22.2446	3.17693	9.83331	27.2499	36.6325	-11.3089	18.5453	11.266	11.1932	14.8781	17.8551	10.4073
20.9	18.9424	28.2301	22.5215	15.9141	13.7894	27.5427	30.0394	32.6891	22.7553	9.70724	9.94973	20.9613	29.1311	-12.936	17.9354	7.25675	10.1009	16.9559	18.5914	8.432
21	21.9079	25.5695	23.4526	21.7966	14.6686	31.5798	30.4535	32.9854	26.1784	1.17242	9.0631	22.7713	26.2597	-10.9892	17.3302	8.59708	12	13.9764	16.5252	11.9137
21.1	18.3524	24.0786	23.9671	36.0695	13.3144	24.1632	30.5928	34.4181	23.8541	6.65355	5.3433	22.6628	29.8025	-8.07376	20.7176	10.8986	11.2717	10.4539	15.4902	10.7501
21.2	18.0063	30.0426	21.6553	16.5686	12.5177	27.7428	28.5287	32.3868	26.6335	1.97185	8.46084	21.4455	36.5542	-7.89467	17.4258	9.26422	11.5335	14.17	17.3573	11.7264
21.3	16.5481	30.108	20.9029	26.1573	14.198	20.9336	28.5087	31.4906	23.0512	6.93976	12.127	24.6887	30.341	-16.4567	16.4789	8.64105	5.89986	12.2334	19.8245	14.6669
21.4	18.5307	26.5616	24.658	26.187	11.9341	25.1036	28.8723	31.9502	22.4716	7.3989	11.5687	21.0735	28.9552	-8.48192	22.1159	11.1748	11.6609	9.74629	16.8012	13.9831
21.5	18.2307	28.7082	23.1113	27.0602	11.3281	23.3555	27.7429	32.6133	20.2106	3.04865	8.23705	23.1841	34.2676	-11.3935	15.8225	16.7056	12.9536	11.3245	14.6879	13.7492
21.6	16.3591	27.3796	23.7173	20.8103	14.7312	23.6688	30.0201	32.4291	24.7518	5.2819	12.977	25.296	25.2499	-11.6194	16.5348	12.2669	6.69178	13.0433	17.2719	11.3793
21.7	15.9312	24.9972	24.1213	17.7481	11.2811	31.819	27.9042	33.7984	19.8129	1.97198	10.0768	23.1216	27.066	-9.87188	15.9593	14.9967	7.50988	10.9952	14.8149	10.1543
21.8	15.0404	29.6972	21.6962	29.1227	9.64792	25.3073	29.4383	32.0557	19.7952	9.2823	7.86075	23.0247	26.2523	-9.64795	20.7499	11.318	11.1303	12.9636	17.9134	8.93532
21.9	15.2865	28.4846	24.024	17.6442	11.6972	23.2248	29.001	31.7615	21.9927	-1.51643	11.3594	25.1501	24.3598	-14.4469	17.9141	11.8354	6.63618	7.58341	15.6834	12.1354
22	17.1452	26.9823	23.0408	23.1842	12.7273	19.8722	26.681	27.3123	21.8569	8.32368	8.14774	22.5199	29.0933	-9.672	18.6883	9.76404	3.75055	11.3417	14.6007	9.32898
22.1	17.0466	26.8943	24.3671	16.2982	7.34829	22.7141	25.6339	30.0181	22.9119	5.60982	11.3629	16.741	30.2837	-12.5828	15.9339	10.1135	7.56314	10.737	16.2721	8.23584
22.2	16.1763	26.5954	20.578	4.55828	8.24695	29.033	27.2506	29.5004	23.2712	2.31137	5.57189	20.9371	31.5929	-6.88882	16.1987	8.2147	13.6656	10.6627	13.495	8.4743
22.3	17.2909	30.3096	22.829	4.2953	12.3105	25.1055	25.8672	33.4882	24.8618	2.84742	11.0089	21.5996	27.9078	-12.6945	20.5787	8.89754	7.68691	11.6923	17.9179	10.2864
22.4	13.2677	25.7422	21.0918	11.2834	8.76189	29.7271	28.6857	30.1828	23.2205	7.34622	13.1308	25.0123	26.6849	-9.18497	20.3479	4.11963	11.3572	13.7894	14.8052	10.8618
22.5	14.3091	26.8442	19.897	16.6164	7.32226	24.107	26.6413	31.7929	23.7681	0.950923	6.82798	19.2711	22.925	-9.13631	17.9385	11.385	0.12342	11.8173	19.0213	10.9909
22.6	16.6459	24.374	22.4927	6.04414	10.396	27.9614	26.5025	29.5657	26.7598	-0.493051	6.24865	23.4018	24.9311	-10.4212	18.9509	15.2417	8.01582	10.8866	15.9678	10.0402
22.7	17.5519	22.8755	21.5009	3.68095	9.18356	31.2889	24.6103	32.0211	27.0194	-0.589326	15.6883	21.1284	31.0887	-10.4485	17.4365	9.07236	12.4967	8.81042	11.8708	10.5386
22.8	14.4054	24.4133	21.4995	10.1929	11.5571	25.9846	24.0482	26.4181	23.9557	-0.591279	7.74036	22.9682	33.8016	-9.3685	14.4402	5.13654	7.86792	11.8908	17.0125	11.4127
22.9	12.2194	25.2339	20.713	26.9746	9.43909	16.4662	23.8242	28.5798	25.261	7.22997	11.0761	23.6936	28.8006	-8.11792	18.6511	10.039	8.88213	8.97297	10.8015	10.5702
23	15.3038	26.7549	22.6583	23.1057	8.00639	19.8979	22.7571	27.8242	27.363	-2.32294	8.47101	22.8048	34.9406	-10.0666	16.8511	9.51194	-5.93391	11.8723	14.2535	9.57227
23.1	16.8794	24.1446	22.8106	13.4394	10.0626	16.9324	24.5847	26.6814	24.8959	12.7545	7.73675	20.2524	30.1526	-13.6671	19.0064	7.10505	8.50464	8.06989	10.3867	11.6709
23.2	16.0843	20.8085	18.3505	12.7446	10.7429	14.4413	19.9803	25.877	21.7883	5.82788	6.59644	18.204	32.3144	-12.8399	19.3084	5.72785	11.4726	8.99383	15.1431	10.914
23.3	12.4391	22.4547	23.2361	-0.39919	2.41211	19.1478	25.9977	28.8699	22.9149	0.842364	9.29096	24.9129	31.8619	-6.78622	16.5898	5.72603	10.3946	11.5136	14.685	10.9858
23.4	16.4455	23.6932	20.86	5.20014	7.47055	22.112	21.6738	29.0733	25.7259	-1.94143	10.5843	21.9796	29.2224	-7.44138	16.9094	13.1569	5.12634	14.1263	10.9201	12.0222
23.5	17.0292	21.071	20.389	16.5435	1.54188	15.0726	25.3603	29.0161	25.4468	4.03062	8.21628	22.3715	32.4016	-12.2877	18.801	11.5828	7.31316	11.9746	12.8524	9.51748
23.6	17.9797	21.0156	20.3818	17.3107	6.31918	22.2888	24.5565	26.0233	23.1314	-5.043	7.946	21.9161	24.647	-8.04881	15.3735	6.92803	6.63804	8.99123	10.5359	8.92478
23.7	16.7405	21.9903	21.1754	17.8581	10.0677	25.6192	24.9502	28.3608	24.3823	-1.65652	12.5072	25.8422	29.0381	-7.30035	20.1533	17.2197	12.7633	10.0855	10.3386	11.7508
23.8	18.5591	22.5434	19.6587	15.7693	9.65944	18.7039	24.4803	24.2047	22.7383	12.1624	11.1429	20.6412	29.471	-8.16122	17.6551	4.65997	8.24173	9.7696	12.9698	10.7653
23.9	15.8089	21.0318	17.9814	20.5507	12.7714	17.1638	22.88	27.4804	23.5259	-0.302358	7.29605	21.462	32.9972	-11.4815	19.1348	6.69923	7.85969	10.4549	11.2813	8.22107
24	18.4247	23.7682	18.6993	6.23119	10.7311	19.3148	23.7792	25.3295	23.2425	11.9701	9.05329	20.4734	27.4382	-9.05955	17.3405	8.25263	8.84571	6.95524	14.1151	8.61893
24.1	15.606	22.8621	17.6578	10.249	9.60254	16.7883	24.9554	25.0739	23.9622	2.56328	8.95514	21.6571	26.5003	-6.18508	17.8084	4.91103	8.95725	11.8683	13.5659	10.6545
24.2	16.4366	23.4085	18.0592	-13.0289	9.2001	19.0068	23.9354	22.5108	22.9677	0.150256	5.05136	19.1262	29.2176	-14.8962	15.6538	5.07363	11.2553	13.1994	11.2454	8.93218
24.3	16.7722	22.4355	18.9516	0.448224	8.88934	16.435	26.34	21.7788	21.8635	6.75326	6.02682	18.0226	22.2286	-8.89153	18.6936	11.0465	10.0802	10.8381	15.3502	8.23612
24.4	17.571	21.0218	18.4096	-3.46778	6.94314	17.19	24.7387	25.2782	20.1438	3.91069	9.1203	16.9092	25.5993	-11.4723	17.2272	9.18531	2.50381	8.49854	11.2504	13.718
24.5	13.7396	22.9936	17.2981	5.23371	5.72404	9.50264	22.5399	23.8121	23.7631	4.9496	5.23441	21.0753	30.2499	-10.4528	17.56	3.3571	11.2578	12.6535	12.4494	9.572
24.6	10.6123	23.3177	17.1366	11.5682	6.17974	11.7311	24.7732	25.4716	19.8981	9.68531	4.25162	19.2703	30.6752	-14.6893	15.2598	3.28482	5.97933	10.994	13.263	10.1405
24.7	15.5168	19.7585	18.6231	23.1567	9.86671	16.9165	23.5653	27.9623	22.5086	4.14706	7.22532	16.7151	30.2456	-5.55778	17.1932	5.30983	12.9536	10.8489	14.8089	11.1402
24.8	13.5471	19.6211	17.6909	23.35	8.93123	12.604	21.0542	23.7762	23.4116	6.04154	7.58057	24.8358	26.2991	-3.24621	18.0241	2.65567	4.14503	11.657	11.5078	7.35933
24.9	8.75263	23.6066	16.3324	25.0797	8.67291	19.3181	21.1673	24.2116	21.568	0.243278	5.02215	21.7058	26.3621	-5.51406	19.0208	5.04854	5.93173	10.5782	12.782	7.67122
25	11.4838	19.6198	16.7351	19.4009	7.31042	14.5124	20.4943	24.296	19.2662	-4.05166	5.80388	16.5107	30.7466	-9.90846	18.5491	5.90892	14.6628	9.90237	8.68485	6.69395
25.1	-9.78133	20.0348	14.8661	12.308	6.02653	14.2636	20.9856	25.1494	19.5215	1.62487	5.71977	19.7908	29.2322	-8.84048	16.3253	1.22941	11.6903	7.51237	11.5752	7.93124
25.2	1.49365	18.9027	17.0277	7.73917	8.72144	11.9259	21.3023	21.081	23.1962	3.60513	4.31204	21.4202	24.8568	-6.23477	16.2721	7.8922	7.19267	6.62303	10.407	7.17878
25.3	11.369	18.3319	17.5986	4.51225	8.71039	9.20435	21.0262	24.0542	20.9756	6.82705	5.01475	22.1022	22.3613	-8.2552	15.7523	-2.77107	6.95734	12.62	11.7834	6.56657
25.4	5.15558	17.2468	14.949	21.4221	6.85925	7.70999	19.1924	26.5432	19.4367	0.587046	0.272262	20.9751	29.6278	-5.20457	15.1412	-0.537318	6.55407	10.5127	14.0944	8.09
25.5	14.2864	20.2109	17.6796	9.38387	8.1908	21.642	24.1266	21.8429	23.9493	4.47502	4.43547	23.642	29.3371	-5.91027	19.6558	6.58433	6.45159	10.8368	8.53159	7.72513
25.6	11.4767	20.4441	16.9972	1.27549	-0.59477	16.7941	14.8862	21.0142	21.8506	3.36647	4.88851	19.0608	30.4993	-8.62625	17.3277	1.55821	6.50231	7.94044	9.04697	9.90832
25.7	9.12184	19.4261	15.0835	13.0048	11.6995	20.1479	18.0302	24.5893	20.3425	6.42508	5.51203	17.5407	23.1498	-1.75585	14.9107	-0.11488	7.64913	8.07279	7.74876	9.43905
25.8	12.1927	17.9717	14.1477	12.8028	11.6642	10.4008	16.4778	23.4023	20.2881	7.46448	4.75625	21.5473	30.3735	-4.47219	16.3411	8.95106	4.87633	9.60837	8.21651	7.60328
25.9	14.2616	19.8038	14.9752	21.3018	10.0701	12.8772	20.5167	24.6976	17.4933	6.63025	3.779	21.5458	20.9511	-6.16678	18.4413	2.19033	11.6171	6.41245	10.8378	8.45852
26	10.3489	21.6427	17.4237	18.2202	9.66002	12.9405	17.6851	23.1949	19.7373	7.64538	2.89326	20.5697	28.0017	-3.0433	16.2892	4.36756	4.11494	5.50776	11.4859	7.78604
26.1	15.9844	20.5208	17.9043	12.535	6.94404	10.4028	18.8345	24.5101	25.8235	2.76045	2.14501	20.2606	25.3432	-6.2069	16.0684	2.37103	9.65051	8.96164	14.8335	6.19177
26.2	15.0343	20.1485	15.9423	24.3753	12.3633	15.228	20.9094	23.3589	21.756	4.04972	3.54222	21.3975	22.8871	-5.01541	16.704	3.83988	8.54175	6.87808	14.6735	7.17213
26.3	7.80678	18.73	15.8258	19.1696	8.51645	12.4965	19.9687	19.3976	19.6313	10.32	7.70277	17.1905	26.6869	-2.22358	13.9643	4.49081	8.36267	9.88912	11.4707	6.43302
26.4	9.77809	17.9012	13.6279	21.4343	8.62652	12.5209	20.553	21.7384	22.5543	0.651589	4.10414	20.636	27.1836	-1.52384	16.4824	5.96072	5.73625	7.49638	8.51162	7.51298
26.5	9.66452	21.1094	14.0041	23.4378	7.26073	13.6633	18.9295	19.4667	22.9948	0.382542	3.80561	19.8067	25.4051	-2.95769	17.235	5.98736	14.2031	11.5451	8.3722	6.14735
26.6	16.7826	16.73	13.8363	25.8988	10.6455	10.6642	17.0029	20.5675	23.5771	-0.871762	-0.32905	18.7489	21.0178	-3.10669	16.2046	6.62724	12.4834	7.1853	8.29008	6.77269
26.7	7.88723	18.5752	13.5686	20.1051	6.87179	6.59264	19.1354	18.5735	20.8667	9.16308	3.08233	19.6474	26.7281	-7.35277	16.4422	6.32523	11.3431	7.72758	11.7274	6.90313
26.8	11.593	17.6685	14.9909	20.2997	2.41667	3.01535	17.2134	19.9088	19.4284	13.7919	-3.34936	19.6411	20.5197	-7.31102	16.4776	7.55605	10.2795	6.63127	7.74289	4.89657
26.9	16.0135	19.5338	15.2412	22.4717	8.25244	3.61651	20.5894	19.0205	23.5154	8.89103	0.728914	22.7598	26.1571	-0.683467	16.133	8.2059	10.0103	7.28484	7.77971	4.9017
27	10.2807	21.1041	15.1793	40.9503	4.79317	10.118	17.1446	16.6155	19.1656	10.7819	0.675639	22.3907	21.8645	-2.41887	15.9055	8.4978	10.3208	7.83639	9.58007	8.43682
27.1	10.2433	17.141	13.2811	35.3567	11.0999	7.64457	15.5042	19.8481	19.9412	13.7344	-2.43292	18.1856	22.0055	-5.31707	15.9587	5.46973	14.5026	6.03011	8.56222	6.09701
27.2	11.4581	16.8977	12.9759	45.7234	7.16763	5.05544	17.2461	21.1961	18.1417	10.5069	0.859069	20.8535	20.6789	-4.82646	17.6662	4.53495	6.85758	6.1789	5.11202	4.5115
27.3	11.0962	19.5413	16.5886	31.0525	4.53268	8.94578	17.2411	17.1175	19.618	-1.62771	2.34258	20.6035	26.6839	-2.16578	18.9696	8.35548	8.85517	6.64267	7.29185	5.09044
27.4	7.94667	17.497	12.4527	26.6032	6.23312	4.37803	16.6965	16.6982	20.573	5.31553	-0.543189	17.6087	23.351	-6.38727	17.5765	8.0235	4.93688	5.46329	8.6704	7.77768
27.5	5.16606	19.0925	16.1448	16.6525	8.16914	7.85042	14.4776	20.8447	22.9325	2.10108	7.18465	19.3161	27.4183	-10.2842	17.2268	5.21515	9.34159	6.40881	9.07172	6.40783
27.6	12.9817	16.8167	13.8108	25.1156	6.48178	2.86264	19.2769	20.0951	22.4167	-0.370371	5.27411	21.2416	17.7508	-2.04612	15.4491	4.08202	4.59647	6.15479	8.05427	3.97656
27.7	10.0326	16.8584	13.9438	33.1226	6.18482	1.48745	14.5166	21.075	17.4345	7.76284	0.868836	17.2823	22.0618	-4.16076	19.1075	8.84888	6.52885	12.2334	7.70161	5.40938
27.8	6.95867	16.2074	15.5845	37.9892	-0.00172	6.83049	14.5801	20.6832	20.5922	2.50155	-1.91718	16.9528	26.7154	-4.2136	15.3957	4.2008	3.52406	6.56057	6.39547	3.2807
27.9	5.09225	17.16	15.644	38.1917	3.74901	4.48097	13.0024	16.5695	19.3835	1.54481	6.11159	21.5101	18.2294	-6.83661	17.4933	4.83302	5.58763	8.00097	8.80374	8.59925
28	5.86026	16.6829	15.6557	32.2927	4.19427	4.05566	18.0867	20.7409	21.7279	11.9975	1.59937	20.8639	25.4343	-4.68029	15.4579	-2.32568	10.842	5.85795	7.13074	5.29373
28.1	9.64825	15.5102	11.9132	26.9265	9.49515	6.54887	13.4073	22.3614	20.8145	-0.140654	3.53312	18.725	18.4063	-0.725039	12.9788	3.24309	8.93426	7.36775	12.1326	7.39594
28.2	8.88194	17.3672	12.3085	38.8617	6.94446	4.87906	15.9427	18.2912	24.9191	5.3036	-0.939247	20.3007	29.7033	-3.38354	19.0035	3.06382	6.66893	10.4207	5.43412	7.79074
28.3	12.0716	16.5157	12.9528	31.1034	8.25875	4.31616	13.2966	19.8975	20.4799	8.57442	-3.846	18.6201	18.4513	2.75167	18.8473	3.72916	4.74704	4.6913	6.90318	7.58808
28.4	9.83337	17.413	11.6708	16.4302	7.66864	5.13534	17.0705	17.2054	23.1287	-0.189847	0.426979	20.265	24.7181	-6.84367	19.9494	1.38774	8.63082	9.47435	9.72531	4.55665
28.5	7.72288	14.1192	13.8362	15.3074	6.0401	9.34013	14.102	18.2258	19.5422	13.7812	2.26592	16.7344	25.2523	-2.77481	18.9211	11.7752	5.99444	6.41385	4.70855	5.98224
28.6	8.488	14.6753	13.1612	13.3252	4.45299	12.1764	15.3509	14.3052	22.9553	2.48242	0.219994	15.6472	15.2222	-5.89361	12.1019	3.20255	0.0519252	5.78293	9.04832	4.29936
28.7	2.78507	12.1057	11.5471	32.6573	-0.93082	11.637	15.1295	16.7386	21.0057	5.67334	1.38197	19.5525	24.0621	-3.522	14.538	5.3994	3.92454	5.2939	3.22699	-0.944776
28.8	9.79039	17.292	11.4276	26.3954	6.23427	9.63412	15.2589	14.85	19.8739	2.73739	2.39709	27.3078	28.6147	-2.58706	15.9907	5.27856	8.0435	5.27998	5.28785	4.24492
28.9	10.1673	13.88	11.5366	15.639	5.84187	5.14604	10.8477	14.8604	19.4359	7.83858	-1.64891	18.095	22.0896	-2.79248	15.0376	4.02037	11.2697	5.44104	7.89762	6.32633
29	1.7167	13.5967	12.5248	13.712	-5.57227	4.45842	15.0533	18.6648	17.8792	5.55767	0.245833	22.7627	20.2951	-3.34388	14.6128	3.97424	7.43115	5.86559	6.93107	3.77449
29.1	9.41703	15.3083	13.089	8.17698	6.29061	11.3583	14.2198	16.9038	18.7606	10.6179	-4.65172	16.6239	26.5279	-4.31368	15.5213	5.08509	11.8637	5.67972	3.58827	3.59341
29.2	8.17845	14.0669	10.0162	26.3451	4.28342	13.4958	14.1281	16.6981	22.4712	10.5209	4.99036	16.6578	18.4363	0.000288499	14.7477	6.37125	6.976	4.36042	4.53987	4.43651
29.3	8.32044	13.9757	10.4638	30.0476	3.16154	4.0658	15.5149	14.5644	22.9786	3.03292	3.6278	21.8489	23.32	0.0462505	16.0342	5.67685	8.89438	6.23248	7.25625	3.57078
29.4	8.55972	14.2104	12.4128	19.5318	8.3483	8.82698	13.0793	17.8924	20.7061	6.41653	1.22236	23.0959	23.8026	-1.45086	15.3117	3.79792	9.78075	3.45142	5.86618	5.49348
29.5	8.69291	12.2383	10.725	21.2098	6.1713	7.14469	13.6619	17.3865	18.1397	12.9746	2.2379	20.5163	15.6488	1.98082	11.7989	0.375393	7.21658	4.69314	7.78275	3.58672
29.6	5.92197	14.4572	11.4922	33.3299	6.74123	4.96301	13.7447	14.942	19.3332	2.23239	0.533805	16.781	21.0385	4.54312	17.1562	5.72676	1.12811	5.34695	5.11695	7.36842
29.7	5.4888	15.0543	10.4932	36.0571	5.52818	3.62595	14.4624	15.8101	21.2734	-0.134214	1.19645	20.2312	26.2813	2.21924	16.3756	3.44566	4.93952	6.58045	5.06871	3.31892
29.8	8.48359	12.729	12.0831	43.0933	7.9114	1.08891	12.5089	13.3082	20.5541	2.11951	2.62595	16.7021	23.0923	1.81252	17.2463	3.88771	8.15643	4.99412	-0.922177	4.44027
29.9	6.4561	14.6188	10.3533	45.6804	9.33126	5.15659	13.6185	14.3084	21.2767	3.29944	1.50259	13.0587	14.8732	6.47253	16.5174	5.96238	10.5155	5.87657	4.51944	3.71146
30	7.27689	12.4017	10.6568	41.521	3.98192	5.63802	13.332	12.8519	16.7037	-3.22041	4.1341	19.6023	14.445	4.98542	15.4778	3.38943	4.94237	6.72498	3.84537	5.53342
30.1	4.70483	9.19643	10.4565	59.0291	1.46603	2.40679	15.669	11.7115	16.0899	4.25017	7.33606	15.4338	17.237	-0.489927	15.7774	6.53739	8.09079	5.30188	4.60309	3.10087
30.2	8.4693	11.4755	10.8747	49.0518	6.40323	3.58741	12.211	14.1504	18.2593	3.33212	-0.267956	16.1462	17.8962	3.38555	18.1741	2.06695	6.78533	3.75721	-0.819878	4.89581
30.3	7.22697	11.0427	10.0625	45.2348	5.05855	1.31534	11.4339	15.3171	19.0444	-1.74167	1.85967	10.1913	17.3878	2.30009	17.7933	4.31868	9.23783	7.21131	-2.4832	2.66191
30.4	4.31542	11.8584	9.13319	53.1085	5.38303	2.22852	13.7753	12.2984	17.5663	-0.960883	-2.21016	14.3588	18.4283	1.76917	13.5593	4.6957	8.73944	5.94201	2.23564	3.54426
30.5	5.96933	11.136	9.13942	41.5403	7.20009	7.56067	13.3435	14.9764	15.3972	3.65427	-0.326603	12.3814	17.5842	3.25266	14.0968	0.164265	8.92537	5.5114	-4.30728	5.38069
30.6	3.52363	12.241	9.05613	57.9522	4.61893	3.00544	10.6259	15.0779	19.4018	-2.12716	-0.439715	17.911	18.3259	7.67395	14.2999	4.75997	5.28916	5.97875	2.58094	3.97763
30.7	5.94947	12.5865	10.9708	54.1215	6.1964	-0.89863	14.7181	9.73767	15.8994	8.33823	-0.740888	18.2102	16.7267	-0.890715	13.7468	6.29407	9.54921	4.44702	-5.86793	5.54302
30.8	4.55059	7.2912	9.14283	39.0052	8.83644	2.73839	12.124	15.0161	18.7309	11.0687	-2.24016	13.9422	21.59	0.930807	13.1779	8.22052	6.41983	4.74674	0.681599	4.26741
30.9	6.19044	12.0378	7.41337	43.087	8.00479	-3.58741	9.09206	16.9276	17.1787	5.59536	-2.98034	12.9686	15.7111	4.23671	12.352	10.5568	1.61993	6.28462	-1.5972	6.14504
31	6.95709	12.1243	9.21915	26.7391	5.92486	0.808186	8.58241	14.6248	19.6814	1.54042	-6.39933	15.2037	24.2157	3.28493	16.0093	-0.442332	3.01512	6.86698	-5.40823	3.22036
31.1	6.23037	13.8832	9.68934	44.2958	2.83811	2.54732	11.3003	15.3134	19.2579	2.14009	-2.62136	12.4054	22.9345	4.06365	14.009	2.32018	2.55243	6.14295	-2.34887	3.01678
31.2	2.31057	14.4821	8.84751	35.7607	-4.99316	-0.92889	9.81412	14.89	19.2801	-0.0796186	-0.628109	16.3941	26.0372	9.57899	16.2847	5.83006	5.3141	8.62716	-4.23739	-0.790338
31.3	4.4598	13.328	8.94541	46.5982	0.344653	2.38627	12.3354	10.6579	17.1285	9.79524	0.0481973	18.6212	17.4359	1.70568	11.4664	-4.27506	5.23951	6.75622	-2.05623	4.41472
31.4	6.06642	11.9246	8.97926	35.5573	1.47073	-0.36551	11.7506	13.8695	19.8804	1.05142	-4.17168	12.1487	13.0454	2.67452	14.3138	-1.34023	5.53261	5.60639	-4.29142	2.66267
31.5	8.93003	10.5384	8.75295	52.995	4.65834	-1.16399	10.8233	11.71	21.1013	2.9493	-2.30718	12.6111	24.838	2.75778	14.6889	-0.9263	2.18177	4.55542	-3.30095	3.13136
31.6	7.93569	12.4114	10.5297	43.5034	-1.17179	2.03457	12.3368	13.1235	16.4881	8.13183	-6.40365	17.6901	23.0191	4.87973	16.2952	2.14946	2.13583	5.09597	-6.62602	4.78175
31.7	12.8558	11.0563	9.58373	43.7126	4.35876	-4.7352	10.9213	13.4428	16.9814	7.22885	-6.78613	14.9726	16.7697	5.1362	11.3631	-0.410247	1.72602	4.22362	-5.4621	3.94671
31.8	10.179	11.1055	8.94745	43.5389	-2.18015	-1.06186	10.9361	13.0828	14.5952	7.05597	-2.76006	13.5522	25.3822	5.27349	14.3471	-2.5709	-0.872817	6.34909	-3.91695	4.06849
31.9	7.81553	9.65263	7.70782	48.2843	0.492762	2.08582	9.5976	11.7946	20.1416	4.39925	0.00735259	10.4863	28.5698	6.41392	13.4665	2.09199	1.80456	6.53244	-2.17239	2.94797
32	9.67342	9.90441	8.68473	39.6874	3.52595	-0.46438	11.6806	12.6427	18.3475	4.13075	0.853618	11.1296	25.106	6.3298	15.3025	3.45506	0.606575	5.31171	-4.20373	1.26828
32.1	9.90008	10.9885	8.34742	50.3496	5.11163	-3.83813	11.5567	11.0361	15.876	5.31157	-1.7016	14.9931	24.0327	3.19516	14.3848	3.16324	0.538295	6.29086	-5.49683	3.49356
32.2	11.4752	14.1751	7.84815	25.9173	-0.71866	-3.94082	9.66144	13.2334	16.1255	7.93813	-3.16945	19.1028	23.4024	7.89218	10.2246	1.44632	3.16957	8.00736	-4.51195	1.24221
32.3	6.46049	10.6369	8.30694	31.8266	-0.60575	-0.63251	14.1942	11.957	16.2183	7.87769	-1.08985	12.4242	17.1235	5.69534	14.3882	0.534521	2.38913	1.63027	-1.44492	4.80076
32.4	2.93131	8.84778	8.44655	43.2476	2.89192	-3.79091	10.818	13.5302	17.9303	8.90796	-2.3458	11.6133	14.6585	9.39232	14.6886	0.222688	-0.0131436	4.93151	-8.84627	2.71864
32.5	5.17558	11.0105	7.84307	58.5429	-4.14323	-4.20288	10.4565	10.427	17.3861	6.92702	-1.19462	11.6034	18.4497	12.2859	13.2015	-6.15955	3.63532	4.85305	-3.60791	2.96602
32.6	6.19025	9.70582	8.17762	48.5344	-2.01254	2.15038	9.19688	9.45687	18.275	6.26376	3.8225	9.96015	15.5214	8.12085	11.7144	-3.48331	2.21832	5.05008	-3.48444	2.77711
32.7	3.8513	11.1007	7.69486	31.4028	-0.11174	-1.44386	11.4016	10.295	15.5587	3.36097	-6.40251	14.3868	17.5474	11.2767	11.9586	-0.0324545	3.18526	7.27827	-0.799424	3.12979
32.8	7.83142	10.5586	6.06548	43.6598	1.41735	0.825548	9.91714	13.9554	16.7747	4.07988	-1.95757	16.8826	13.3412	4.20745	16.7712	1.45434	0.319991	7.5218	-5.64484	4.65773
32.9	7.8928	10.2954	9.54732	42.7537	2.3771	4.0119	8.31115	12.2443	14.6536	10.352	-5.34782	16.8973	14.9628	8.20071	15.0365	4.09924	3.12576	4.44301	-2.36258	2.48889
33	8.05163	12.4652	7.50995	44.2384	2.10887	-1.31999	9.10739	10.0445	15.064	11.9462	-1.74043	8.84826	17.2515	4.86212	14.7816	1.96386	8.92397	4.97435	-3.97597	3.59303
33.1	8.23133	11.0774	8.70247	37.7398	0.263159	-8.3291	9.44565	8.50192	15.2594	-2.4883	-2.72885	15.8614	12.8696	8.64761	14.2673	2.77696	6.20833	5.6934	-2.481	2.88252
33.2	8.86443	9.57691	6.81732	40.2794	-2.78405	-3.66953	9.37328	7.73784	19.5396	3.06672	0.180184	15.1334	17.0724	4.16904	14.0286	13.0342	6.71198	4.49317	-4.30512	1.26381
33.3	7.38952	8.22153	5.66195	41.2844	3.28333	-1.59396	9.98172	13.6659	13.3958	8.32169	-2.02784	14.4055	15.3304	7.30385	16.1015	9.58178	5.94281	3.67871	-0.530588	4.46708
33.4	6.32104	9.08396	5.86848	54.2101	-2.31275	-2.55915	8.70759	11.7678	13.2256	11.9409	-4.82589	16.018	17.2017	11.3682	13.1376	4.14769	7.90552	5.97767	-1.56442	4.3387
33.5	6.05518	8.46291	5.51039	37.5149	-0.32495	-3.89722	6.92638	8.91051	12.6662	3.0276	-6.77939	11.0529	14.9256	7.75905	14.8118	5.88853	4.85973	4.79494	-1.51589	3.35585
33.6	5.10865	7.64566	8.86218	50.9654	2.50771	-0.99842	8.01777	9.66926	14.5657	12.0402	-7.01143	12.2933	15.8477	9.43381	16.4964	6.82418	3.84774	5.38318	-2.78314	0.551915
33.7	6.27177	9.4661	7.11091	36.3846	1.8072	-1.97692	7.02115	11.35	17.5391	10.7384	-5.28419	13.7885	13.58	7.56175	9.67488	4.36756	1.95695	5.98161	-1.49973	5.2942
33.8	6.34547	8.49789	7.902	26.3894	-0.17529	4.07749	7.90757	8.83216	14.1175	9.29529	-3.1951	7.49279	18.9815	13.8893	12.1275	5.40945	1.73989	8.14558	-1.72985	-0.623337
33.9	9.11665	10.3638	6.7357	31.3843	2.40345	3.67601	7.41325	8.73084	15.7236	6.20701	-3.70065	13.1891	24.0146	12.6873	12.3808	8.41489	5.18846	7.66713	-0.658257	2.01695
34	7.62255	8.27864	4.83812	41.161	0.432333	-1.48148	6.22093	9.3404	16.3422	5.43316	-8.95057	17.1326	16.969	10.4937	15.751	6.9942	3.55522	7.57182	-2.11573	0.16079
34.1	6.76057	6.87018	5.54205	35.3863	-2.35586	5.3257	9.77569	11.3555	16.9616	7.23909	-7.10008	13.9284	16.1457	10.7861	13.3794	14.695	4.0504	8.47942	-3.32482	5.28187
34.2	7.14236	8.99547	5.3043	44.0338	2.41629	2.17285	7.60769	9.0273	12.9366	6.47518	-5.98044	14.2476	16.5395	8.15617	9.95359	5.15576	-6.09293	6.34049	0.445268	4.11724
34.3	6.54131	9.31725	7.23722	49.6564	0.834046	8.07974	9.01026	8.58222	14.6617	11.3934	-4.69759	11.3933	15.6449	10.8867	15.3633	8.50176	6.73837	6.16293	-4.54506	1.81683
34.4	5.1504	6.92685	6.83559	50.6309	1.04471	-0.66432	4.85097	5.80905	16.5821	4.08661	-5.29774	9.72486	23.9312	10.7562	11.4081	1.61571	2.94306	7.75633	-3.91332	1.5952
34.5	7.83415	8.98564	4.63704	44.457	1.81762	1.14029	6.80781	10.7131	10.9771	12.7823	-4.44424	18.7287	10.1668	8.38555	10.2656	7.03072	8.4524	4.02135	-0.917263	0.478923
34.6	7.26207	10.0567	3.03416	49.9801	-4.03922	7.24351	6.9299	9.94199	12.9726	3.66519	-3.07047	14.0838	14.0544	10.8284	11.9765	10.3664	4.54217	5.32308	1.56491	2.34173
34.7	5.97447	5.96156	2.79155	55.1029	2.62594	3.23548	6.38128	8.43756	11.868	7.64737	-4.05156	11.6273	14.095	14.2743	11.0926	4.37355	0.540651	6.2724	-2.71313	2.13361
34.8	6.83673	7.36425	0.384196	47.4203	0.907516	5.81235	7.35901	11.3338	14.9062	10.7762	-7.25844	11.8348	18.5787	14.4357	16.5421	5.77495	-3.65726	7.43742	-1.12847	-0.0916344
34.9	5.69788	7.87647	4.60206	41.3368	-1.76687	2.26605	6.04103	6.23642	14.641	6.81252	-0.313227	13.0274	15.8504	12.4146	9.76291	6.88085	6.03396	8.01597	2.0709	0.268979
35	3.50795	7.7675	5.55256	59.3399	-0.91677	7.21955	8.22142	8.0192	15.4557	6.53761	-3.12853	10.2301	20.4307	15.7304	13.9721	13.0889	4.25108	7.92559	-0.620982	0.190127
35.1	3.84608	9.65907	6.02531	53.4007	0.623459	7.45527	7.56449	7.32033	16.5527	9.89019	-5.29466	10.7425	12.7257	12.7677	13.1096	7.61932	-0.511056	8.31205	-0.443315	0.0851428
35.2	2.77058	5.39558	5.04013	34.9747	-3.33643	9.05171	7.62108	8.89646	13.9922	14.3052	-4.40234	9.08639	21.1271	13.676	11.8477	6.94465	2.32435	6.67363	-1.92153	-2.38
35.3	3.50425	8.8622	6.45552	43.9846	-1.63023	6.31153	6.77723	9.05231	13.6402	6.62341	-5.23006	8.07701	14.2036	10.4618	13.2802	9.05826	3.75284	6.41477	2.59067	0.0221248
35.4	0.693075	5.90894	4.88063	38.5899	-1.76827	3.07146	5.66204	9.28582	15.1283	4.49413	-8.49126	9.30162	13.6994	11.6936	10.2575	11.8027	0.962552	5.60224	1.02022	-0.403723
35.5	5.27343	8.81659	4.34873	45.0504	3.75255	3.37861	6.15161	3.36836	16.5202	7.52815	-6.58403	16.8351	14.0944	12.3286	12.2525	8.61957	7.37854	6.46049	1.00357	-1.39395
35.6	7.31021	4.89024	4.1805	41.0079	-2.67944	7.1582	9.36244	6.19778	12.3898	7.01847	-0.424891	13.1664	15.6618	13.6434	8.02965	7.54051	3.59153	5.85877	2.84392	0.153983
35.7	4.79092	8.23572	4.28715	31.7213	1.86191	3.01165	10.5071	6.16924	13.2105	13.8076	-3.8183	18.4747	14.383	8.85098	11.0665	12.6998	8.32151	6.74079	3.95959	1.81644
35.8	4.86004	6.08781	5.16027	43.3564	-1.03903	2.01414	9.83869	5.10257	12.1292	1.10828	-0.971713	11.1881	21.9564	14.1356	12.4641	6.10462	3.94321	6.6805	-4.67959	0.569412
35.9	4.97127	6.8009	6.24137	35.6793	-2.55459	3.38857	9.67957	9.94866	16.2169	7.24627	-6.1425	8.97431	22.9191	14.6405	11.3172	7.35462	-0.945142	6.35332	0.515023	2.11507
36	3.45083	7.17436	3.97982	29.8375	-3.411	5.85265	8.81706	6.31834	13.9855	9.36035	-6.96019	9.74515	25.8682	17.7227	12.2824	8.36234	12.2349	8.55404	-0.736973	0.246398
36.1	4.99221	7.68707	5.40529	29.545	1.0721	3.1324	7.75899	4.65377	11.9039	8.9762	-2.95919	8.29317	18.985	19.77	12.803	4.39444	4.71803	7.97479	-6.35934	-0.0467167
36.2	5.64251	6.92186	7.11868	45.5439	0.603775	2.79876	10.0156	5.46537	16.513	10.1228	-4.15474	11.1488	18.0476	18.5496	11.4681	2.61535	7.13513	5.30306	-2.56695	2.1197
36.3	5.73913	5.44491	4.71883	51.7141	0.1741	3.86196	10.0937	7.22794	15.9493	7.19901	-5.75821	10.0887	18.5607	16.7521	12.957	3.8423	4.77338	6.64341	-1.01364	-0.112622
36.4	2.77621	6.77729	1.95441	38.1282	-2.56062	8.47941	5.05047	8.89789	15.1955	12.0363	-4.72233	12.4049	14.7885	15.4608	11.4214	3.33277	6.75905	9.83505	-0.242213	2.04641
36.5	4.59094	7.17752	3.15517	50.6103	-0.43148	0.418144	7.35156	6.61401	14.8589	11.0266	-3.67308	7.3343	18.9519	16.3621	10.6595	10.0119	1.77331	9.05561	1.41353	1.8039
36.6	5.03963	5.14776	4.90351	42.0634	-0.55862	3.97347	10.1131	2.32871	15.203	10.5707	-3.21261	8.16145	21.2675	20.6319	9.98142	8.07002	5.26228	8.14951	-2.42137	1.07866
36.7	7.63742	7.49474	4.55907	35.3858	-2.54816	0.242344	8.93356	5.44903	12.0907	8.54619	-3.17214	9.8243	18.5253	15.6794	11.3121	3.93835	4.45454	10.4146	-0.810557	-1.32697
36.8	4.31388	3.67195	3.15502	30.5396	-3.22156	3.82925	7.14639	4.01017	12.0593	11.9186	-5.22437	0.0322099	14.632	8.76945	8.61612	5.961	1.74353	8.78744	-1.23595	-0.69114
36.9	6.04656	4.64778	4.12883	37.3972	0.021379	0.270239	7.42027	4.42138	9.74991	13.1375	-7.73863	0.082018	20.4399	15.307	11.9664	4.52383	8.19201	10.1348	-1.23625	2.59421
37	2.81693	7.9001	4.71647	29.1702	0.478122	2.65628	9.05667	1.07061	15.2542	4.42963	-4.59605	12.8779	15.6119	16.5414	12.823	5.03586	-0.336736	7.96054	-4.9765	-0.768538
37.1	3.18378	6.60199	4.81597	39.3052	-2.49432	-2.4538	6.09554	0.643651	11.7944	10.7104	-9.2626	10.671	19.8347	15.6839	12.5451	-0.880497	1.64677	8.61605	-3.00846	-1.57407
37.2	5.12422	5.69069	3.00861	32.9966	0.426046	7.24917	7.9536	3.32703	11.5819	3.07	-5.45047	12.4881	22.4856	12.7278	12.9393	5.06249	8.0161	2.59959	-4.90177	-0.383753
37.3	4.41783	8.91354	4.64232	49.6831	-0.20061	2.10502	5.74962	3.74418	13.3868	4.49782	-8.50019	7.92782	21.3745	13.7542	10.4907	5.71469	4.35551	6.12162	-4.86189	0.939826
37.4	3.18012	6.61436	5.48513	31.5096	-6.38295	-2.22709	8.3489	3.55831	13.064	10.5516	-0.562416	12.7998	23.8287	14.481	12.7732	6.45387	4.38321	-2.28856	-6.28227	-0.399564
37.5	9.48012	7.99803	5.60557	55.5473	-4.42767	4.14915	6.36397	4.33822	14.7884	9.39292	-8.23699	8.6078	21.216	13.5753	7.93918	9.39559	4.36331	-0.231631	-3.89306	-0.139083
37.6	5.29133	5.15153	3.5506	51.9163	-4.83722	8.27905	9.20934	2.4673	13.3092	7.58263	-3.36795	7.91455	20.4362	15.1773	11.1952	0.35118	-0.24763	-1.76701	-1.47766	1.92833
37.7	6.61265	5.1153	4.16052	56.4567	-4.09099	6.37396	6.87336	3.80863	17.0649	8.18009	-7.93668	9.35165	14.6469	14.6644	11.4944	3.47166	-3.92199	-3.36405	3.28237	-1.2805
37.8	3.15905	7.20843	4.53245	64.7637	-9.9511	10.4527	5.82494	4.63969	11.8767	8.82662	-8.48893	7.69885	16.2987	10.6532	9.43921	3.63792	-3.19781	1.22041	-0.643629	-0.117226
37.9	3.96857	6.63428	4.50171	56.2675	-8.37344	7.19594	7.64568	4.23909	11.5638	1.37358	-9.13965	7.9776	19.9573	13.8248	10.7807	6.30506	3.04767	-9.76256	0.322869	1.55009
38	1.3172	5.52694	5.06896	59.7522	-4.48701	3.37116	6.50149	4.31332	16.21	12.4958	-4.14261	7.81342	19.7092	15.6965	10.3116	8.16499	0.507745	-6.53534	-7.16747	-5.27028
38.1	3.9352	9.39276	3.8493	57.5234	-5.16071	6.96394	5.04506	2.65769	15.3033	11.3879	-2.52773	9.94967	17.9634	14.995	10.58	7.84607	0.873692	1.79725	-4.68826	-1.16052
38.2	7.90019	5.63585	2.95457	54.3005	-4.06527	4.2835	6.43201	2.41791	14.1222	8.90078	-4.96781	9.08826	13.6095	14.4577	10.5643	6.84151	-3.26755	6.90803	-5.06611	-1.5191
38.3	1.17515	3.20432	1.66409	47.3647	-3.96527	2.58412	7.97495	4.95432	15.7786	8.49822	-5.82795	7.63082	19.2646	10.1987	12.5619	-1.05868	-4.62165	7.88068	-4.64234	1.78955
38.4	6.35495	2.18849	3.5528	55.7774	-8.23033	6.58845	6.55293	2.55236	16.7462	7.88505	-6.17695	9.52204	14.3658	16.9481	8.91327	-0.476301	-2.19817	6.81621	-5.44462	1.60649
38.5	5.96888	1.93721	1.33907	54.0705	-10.0106	10.057	8.75879	5.39891	14.5417	14.7012	-8.51846	11.4345	18.072	14.4471	7.07458	-0.483571	-6.10808	4.63301	-4.6804	-1.933
38.6	6.8201	6.08115	6.23667	55.5947	-4.95027	0.195126	6.46453	4.18938	17.6727	11.5442	-5.75469	11.5852	15.882	12.6064	9.75678	0.739443	-7.40341	-10.9412	-9.63978	-3.13678
38.7	4.60843	3.88839	3.09873	55.0912	-5.33149	4.8685	7.95154	4.97815	13.2062	3.61316	-8.26426	9.84887	15.6468	12.5039	6.32532	-1.42684	-6.34811	-5.54038	-7.14428	-1.26193
38.8	3.73684	2.68145	2.90199	62.1884	-5.3227	-1.57935	6.78602	6.78859	13.593	14.8051	-8.69666	7.26131	18.2784	9.36997	11.6978	-0.0391536	-10.5689	-3.51787	-12.0584	-3.19922
38.9	6.96669	4.32844	5.00118	66.9962	-6.89122	-4.76302	8.14301	6.25404	13.5779	4.46336	-2.49992	9.73524	15.9767	10.7625	6.09388	4.29579	-5.31432	-14.552	-10.6623	1.72855
39	5.79694	3.11374	1.6526	47.1701	-5.05434	0.663472	7.73251	2.7296	12.3154	7.37451	-5.99057	12.1245	19.379	14.0379	10.4122	1.94762	1.56389	-11.2851	-9.74507	-2.65372
39.1	4.23262	4.27309	4.50068	61.2703	-3.18025	3.72549	8.31692	5.37664	12.7332	1.59297	-8.81658	10.2229	20.4818	10.7432	9.87403	3.26923	-0.961869	2.72069	-7.06977	-0.235121
39.2	5.70193	5.06402	3.14761	55.3629	-3.62928	3.41462	8.71871	2.09817	15.7449	14.1628	-6.6404	9.19915	21.6835	18.2375	9.61131	1.66619	0.810853	-5.36154	-7.8656	-3.22884
39.3	9.35523	3.15535	2.93635	69.4534	-6.53464	-0.925	6.60297	5.05482	11.7189	3.89504	-10.9445	9.97419	21.5183	11.851	8.78568	2.2533	5.70596	-4.94871	-5.56363	0.549548
39.4	4.23357	4.66687	1.56362	75.1365	-4.4737	1.90207	5.75359	2.00741	15.1211	3.474	-6.0947	8.86562	17.192	15.245	11.948	3.55668	4.50508	-6.36428	-3.51977	-0.898856
39.5	3.22744	0.949963	1.40946	82.0516	-1.04325	7.70148	6.05256	3.92696	16.7468	12.2435	-8.36513	3.2956	21.3793	17.286	7.29951	2.77942	0.93625	-15.0144	-4.84515	1.02605
39.6	4.59392	3.01306	-0.24649	71.9152	-5.43866	4.37548	7.3544	4.49556	15.8371	6.91204	-5.79428	-0.0466914	20.9853	13.7838	10.0245	2.20371	-10.131	0.666184	-8.01167	1.82162
39.7	5.55501	5.46452	4.10785	75.5199	-1.28057	3.7054	8.67663	0.591186	18.3844	11.5601	-7.89913	4.1086	18.8335	16.0517	5.11677	1.58101	-7.86014	-7.51928	-6.27378	-0.0391242
39.8	6.00702	5.43451	3.95515	74.9448	-4.36712	7.87677	6.63943	2.60632	15.572	9.8256	-8.26405	-1.72923	14.6235	15.1779	13.6412	1.08801	-7.35738	-9.30704	-9.00215	-0.479879
39.9	4.28156	0.532051	3.19584	59.2972	-10.2979	1.76972	6.3501	3.85432	16.5562	7.18048	-3.25087	12.0849	14.8283	16.905	10.4848	0.730513	1.52698	-6.75459	-12.3518	1.7446
40	4.60351	3.54584	3.27579	80.2147	-3.55753	9.17036	7.40918	4.85552	14.3815	9.53304	-5.63155	4.77305	14.197	15.9057	10.6845	5.19447	7.68505		-7.04014	0.850653
40.1	8.02158	2.92791	2.73012	71.5171	-8.41966	3.73396	9.56142	4.63075	17.2719	9.04462	-5.13836	10.9237	11.7028	18.6241	8.71192	-3.05969	1.59632		-5.35012	-1.23076
40.2	5.44584	3.5354	3.41411	47.6577	-5.61485	5.75737	7.33228	2.46108	12.538	8.88405	-7.99125	11.9542	20.1295	14.3731	7.72256	5.70169	5.86685		-3.56343	-0.410113
40.3	7.79591	2.81039	3.8614	68.671	-4.61914	4.61882	6.85439	4.87867	13.8296	8.56594	-4.36992	2.04968	17.6446	18.1231	8.95031	0.0655291	1.88241		-6.58923	-0.991805
40.4	4.51955	4.981	3.5679	51.3223	-6.06507	2.97814	8.88977	4.52072	15.8519	5.07177	-6.24285	7.16898	15.4155	13.218	7.84794	0.282533	3.47404		-8.41127	-0.312148
40.5	6.7641	4.07821	1.89381	67.1051	-14.2753	2.40709	8.81701	-0.14238	18.5424	12.0523	-6.71681	7.86149	16.6366	14.9693	8.17838	5.34713	1.17555		-8.5141	-4.56593
40.6	6.67409	2.49465	3.82503	71.7088	-5.83453	1.9294	8.10627	1.38765	13.0295	11.702	-2.22281	9.93266	23.8685	17.8071	5.75536	6.01405	2.88886		-3.78205	-0.867706
40.7	6.2591	1.39435	2.58023	71.7624	-4.83504	2.29453	8.23235	1.66942	16.3309	12.3025	-6.29176	7.01328	21.9656	14.7415	8.61035	2.79118	2.3481		-4.82724	-0.0620248
40.8	7.2788	2.35427	3.59175	62.274	-8.76255	2.13153	8.76672	1.4523	14.858	6.83672	-10.8956	4.3386	22.0501	17.5484	10.5687	2.76824	4.64577		-8.28694	-2.1498
40.9	6.57305	2.62123	1.78571	71.6724	-7.83255	-1.28964	5.31418	3.24503	18.7714	9.6692	-5.41798	10.9029	11.7903	18.0591	12.156	9.01003	3.92989		-8.05777	-1.45722
41	6.03963	6.58489	2.84243	65.7637	-11.2017	4.53577	7.0176	-0.98993	14.3351	6.02918	-6.19513	5.51649	22.2906	19.2358	8.43993	1.19758	-0.488177		-8.49785	-4.14256
41.1	5.75888	5.32799	1.76319	73.6432	-7.18163	3.19233	9.68525	1.17036	15.4998	10.6109	-7.42353	7.80135	13.8582	15.1925	9.17189	10.409	1.1254		-2.00901	2.23568
41.2	5.68454	3.89257	1.53591	64.2994	-7.30798	3.13636	8.29701	0.805303	11.7715	10.7749	-7.85325	5.25527	18.0763	14.5255	7.45663	6.98823	-2.84225		-4.93692	-0.861126
41.3	8.91249	2.7107	3.08963	72.8917	-5.2409	-1.42564	7.30367	-0.69824	10.3768	6.78692	-4.00787	9.03535	17.875	15.2059	9.51797	4.59175	2.52632		-4.97231	1.23294
41.4	5.03826	2.35517	-0.5556	70.4598	-4.53158	0.679741	8.15648	0.192339	14.5262	9.43983	-7.03388	9.99491	15.9484	15.6898	8.4855	3.85062	-1.7647		-3.39	-1.50607
41.5	6.72159	1.66414	1.78358	82.9098	-5.09522	-0.31971	4.68101	3.51599	13.6152	4.50107	-8.01189	8.20545	18.4386	13.7485	4.65135	6.30502	-1.52195		-5.51332	1.18771
41.6	5.70253	1.77675	3.57003	69.8859	-7.41117	1.18232	9.14662	0.062926	14.6309	12.8874	-9.59766	9.11559	21.9857	10.9017	6.87047	6.75349	3.76499		-9.08299	1.36256
41.7	4.83446	4.30481	1.10769	70.8084	-4.64838	-3.61195	6.60397	2.2109	13.3894	9.18652	-10.3656	9.69641	20.6306	16.5758	5.92818	4.18287	0.233623		-4.43617	0.630879
41.8	3.11574	-0.80705	1.32765	59.9288	-8.88367	1.73386	4.40799	0.323457	10.623	9.83563	-7.2691	12.1108	17.8036	15.3336	6.52567	1.1993	-3.0128		-4.26969	0.0287064
41.9	4.45517	2.74751	-0.7277	57.8199	-6.03834	0.396904	7.8555	-1.54214	10.9276	10.1282	-5.73202	6.36318	13.6661	20.6176	6.80419	7.14535	-9.13558		-4.2421	0.795045
42	6.6483	1.13338	0.420488	62.5352	-18.9257	0.297312	5.12352	-0.17351	13.3507	7.1021	-7.58991	11.1959	21.1395	18.5694	5.13949	1.39884	1.40429		-6.25109	3.35418
42.1	3.27016	-0.61375	-0.43744	70.5594	-11.1203	-4.76456	6.731	1.98312	18.6069	13.6263	-0.949901	9.97018	18.6486	14.246	6.53101	2.66491	5.70675		-6.78346	2.28702
42.2	3.14713	0.817592	3.35798	63.6438	-18.6184	3.1857	6.57238	3.95808	10.3989	13.1945	-6.96473	12.2644	19.2283	11.2099	8.31627	-0.54623	-1.82218		-9.42419	1.68317
42.3	4.75898	0.501496	-1.55213	62.0563	-8.79419	-0.17388	4.73568	0.384326	12.7397	11.6774	-7.86303	10.6908	16.0683	15.0557	9.18776	3.16302	5.552		-7.71949	3.35827
42.4	2.02064	-1.80809	1.321	48.703	-20.7655	-1.57824	2.53511	2.18284	11.4262	16.0456	-8.25315	2.54435	21.7915	16.0243	9.87867	-1.78031	5.56912		-6.18418	2.20716
42.5	2.59033	-0.17874	-2.52423	58.635	-22.6252	-0.48828	4.93967	0.108463	9.68264	12.8231	-6.79094	7.58684	15.863	18.2891	7.25583	-0.248937	-10.2638		-10.9493	3.42147
42.6	1.93759	-0.21013	2.60926	40.4545	-14.6027	0.60312	5.651	-0.2259	12.9558	19.9403	-7.76326	5.64607	20.4008	16.6089	8.56558	-2.19964	-6.26711		-5.89448	1.15995
42.7	-0.51842	-0.21985	-0.05278	53.4995	-22.5038	2.23031	6.93304	-0.63578	13.1781	12.7431	-6.64021	5.26032	16.1942	18.2017	5.6303	-1.65944	-2.87071		-4.56007	3.93187
42.8	3.88313	0.468707	0.175051	46.2322	-18.8632	-0.26566	7.91866	-0.77764	11.786	19.0097	-10.776	4.00595	13.1354	19.027	7.55846	2.65913	-1.21736		-3.31555	4.70845
42.9	1.56104	-1.89614	0.441611	63.2529	-21.4177	-4.9362	6.79372	-1.38419	11.1539	14.3426	-11.4165	10.0175	17.435	14.767	5.8345	0.0888476	-0.490944		-8.19795	1.4226
43	0.167477	-1.38219	0.134756	57.7256	-20.6622	-1.69364	4.77245	1.32317	10.719	12.1854	-7.3903	2.71935	17.5634	12.8476	5.48143	7.0384	-1.96212		-5.59272	1.99666
43.1	-1.49705	-1.17165	1.26862	48.3658	-25.7419	0.186549	6.06379	1.91964	13.0941	16.2022	-10.2375	5.0919	13.6678	17.3604	4.99838	6.95498	0.831395		-5.07891	-3.13977
43.2	3.00214	-6.17705	1.73877	42.3701	-25.8616	-1.78686	2.96317	0.445909	10.8565	15.1566	-7.93468	13.2641	16.8821	17.2107	10.0589	1.92445	2.62502		-9.37075	0.111284
43.3	4.38416	-1.91017	-1.13829	46.6947	-24.8475	-3.55294	5.58349	-1.81442	7.72095	8.75448	-9.63187	7.48977	15.8645	19.3466	5.51181	5.05576	4.93843		-8.10809	-0.942558
43.4	1.56484	2.52503	1.05424	44.9758	-24.003	-4.36539	5.00118	-0.47419	7.18766	11.843	-10.3996	8.44907	20.407	20.3237	4.96414	2.25821	0.0190947		-6.48586	-0.443251
43.5	1.58466	0.06412	1.60105	56.1725	-24.158	1.62705	5.63975	-0.23308	12	18.7463	-9.4256	5.43046	15.2	14.8644	6.63118	-0.735242	2.38236		-6.50101	2.53884
43.6	2.93504	0.676541	1.06851	53.6576	-27.0668	-4.99146	5.6647	-0.5284	11.4914	21.5638	-11.7142	10.7368	19.3178	10.5806	5.77196	1.11977	-5.66101		-8.56861	-3.03737
43.7	2.4333	1.3891	-0.46944	59.9096	-21.1406	-6.34117	5.0945	-6.04298	12.7323	11.5411	-7.17282	4.39998	18.3974	14.0841	6.60697	0.582423	3.29604		-5.32325	-1.76942
43.8	4.74758	-0.39757	2.37241	64.994	-21.816	-7.805	7.01297	-2.41256	16.1907	13.6408	-5.14866	12.0258	15.8493	16.0275	6.71638	7.00423	-14.9608		-6.37856	1.40873
43.9	2.94484	-0.56304	1.54701	59.208	-28.1175	-3.90058	3.38288	-1.61899	14.7909	13.6538	-9.79706	6.49423	15.5972	19.7254	4.65369	-1.93084	2.36178		-5.21837	2.20765
44	-1.34184	-0.58632	2.32285	62.5171	-27.8557	-6.559	7.55097	-3.14101	11.2703	10.0873	-8.43199	3.1626	22.1028	18.8483	4.00028	3.64705	-16.1422		-7.37022	2.15234
44.1	5.22208	3.97534	0.057829	53.5369	-24.0737	-10.0048	8.5928	0.153364	13.9668	9.38455	-6.42974	8.08675	14.1372	13.9442	2.82657	3.05705	-11.352		-6.51579	0.294907
44.2	2.54726	1.16072	1.13442	51.0073	-28.4117	-6.01489	6.81676	1.80556	14.5968	14.354	-10.4426	11.4945	14.5691	13.6258	5.2588	0.798081	-3.46776		-7.57863	3.64402
44.3	3.27375	1.14175	0.726948	48.0027	-24.4499	-5.10857	6.55661	-0.44088	13.9405	17.7911	-7.73452	13.7378	14.0583	7.20317	6.93105	2.41377	-37.5877		-5.4095	0.100666
44.4	3.46523	-0.53437	-0.6253	50.9099	-25.5119	-5.2455	6.04483	1.00284	11.4913	16.3004	-5.14692	11.4091	13.8972	14.1673	7.81362	-0.906766	-19.9955		-3.55265	-0.232083
44.5	1.26233	1.29198	1.04053	45.7838	-27.0077	-3.00013	3.29277	-0.28373	12.876	14.8513	-9.60342	8.95582	16.3603	16.2999	4.94499	3.00168	-10.5851		-5.41944	3.18664
44.6	0.291275	-1.74378	0.72773	36.6374	-28.0009	-2.46353	5.14543	-0.71891	17.989	14.3837	-9.10027	5.44045	17.0051	15.9741	5.27995	2.27993	-11.5261		-12.2375	2.95235
44.7	3.40427	-4.62842	0.794862	49.986	-30.088	-9.7763	4.21179	-0.3282	17.7695	7.16892	-5.8787	7.85207	24.4911	15.4118	9.18244	0.510038	-13.5467		-9.21386	2.03869
44.8	0.461339	-0.14403	0.747309	33.2028	-30.1994	-18.8735	6.82005	-0.94911	15.566	15.1429	-11.7123	8.12856	14.3812	15.2196	7.12607	4.24887	2.04481		-7.63843	1.48637
44.9	0.295481	-1.35697	0.974531	43.5758	-26.3064	-23.4819	5.2732	-1.18151	16.0754	11.2271	-11.9961	7.72529	15.6609	12.1493	6.07802	4.97932	-12.3707		-6.29154	1.30618
45	0.82016	0.708141	1.29221	45.129	-29.1078	-18.1842	2.99029	-2.67127	14.2124	10.3043	-8.91624	12.9071	13.4701	15.8246	6.51667	1.38284	-1.57336		-3.93889	0.632906
45.1	1.13436	0.515799	1.68235	41.1155	-27.3262	-10.8493	2.20511	-2.80031	12.0821	13.3078	-3.13954	8.04088	19.2431	15.6632	6.05291	-1.13256	4.29558		-4.90585	3.23308
45.2	1.91761	-2.04647	0.357973	40.3576	-28.3198	-19.6313	5.84706	-2.39584	11.3794	11.2903	-7.82971	10.1035	16.8533	17.4597	4.59234	-1.61282	-7.12278		-7.86913	1.9626
45.3	2.57238	2.32245	-1.07189	46.6542	-30.0385	-7.67792	5.52135	-1.70627	12.3074	5.27151	-11.0878	12.0428	20.6071	20.4896	5.24263	-0.286469	-9.68746		-3.2837	1.60915
45.4	1.38193	-0.99521	-1.06697	37.7431	-26.5287	-4.45831	5.10173	-1.74932	13.8307	12.744	-10.4628	13.3127	13.0314	13.9516	3.58585	5.04445	-6.99627		-4.2497	0.546529
45.5	2.45224	-1.15189	-0.21988	22.9014	-28.2772	-5.32038	3.55363	-1.21087	13.216	15.1665	-11.1161	7.39961	13.3088	12.8491	6.28137	0.140121	-9.26513		-1.9004	1.63843
45.6	5.07258	1.11757	1.96878	24.3274	-29.4306	-1.26394	2.85476	-0.01396	11.9289	7.0916	-10.8128	10.02	14.6658	16.4934	9.1719	6.07276	-12.0662		-5.08122	1.07991
45.7	3.87318	-2.59323	-1.55886	26.0157	-30.4295	-6.50509	6.3034	-9.23153	12.7702	6.92458	-8.69125	10.2549	18.407	16.9307	4.71028	-0.110538	-1.91397		-4.60748	0.831447
45.8	2.18355	-1.34842	-2.14373	8.10915	-32.4011	-3.48836	5.90728	-2.03956	17.2893	11.0747	-7.95739	7.99073	16.6057	14.7432	4.39227	2.00731	4.32107		-3.80981	1.44979
45.9	2.90011	-0.62474	0.768253	10.5056	-28.7418	-7.8401	3.39458	-5.79925	13.7579	17.4563	-9.86131	6.25658	11.8817	17.3485	6.29687	4.64202	-9.23469		-8.4312	2.43365
46	0.062031	-1.91962	0.258723	20.3258	-26.3921	-6.09119	3.80247	-2.40318	14.9162	20.7782	-10.5669	12.4302	11.3829	19.3985	7.74104	3.22769	-8.78515		-2.18128	-0.077424
46.1	0.595772	-0.59038	-1.06445	8.32722	-29.0074	-6.14989	3.45023	-2.72346	13.6142	15.0137	-8.79836	11.2162	9.94663	16.9399	5.49211	4.52326	-2.91819		-8.61884	1.21495
46.2	-1.43541	-2.7845	1.18169	22.5137	-28.6718	-2.86876	6.229	-2.92059	18.2254	17.9598	-9.21631	8.9858	12.3397	16.5917	8.03681	2.53122	-8.45129		-7.92074	2.52704
46.3	-0.04559	-2.93607	0.71592	24.8506	-31.2946	-2.06008	5.95298	-1.54637	16.0375	11.0621	-8.24025	13.414	13.4697	18.4028	6.07683	-1.33141	-6.01521		-8.14477	1.4649
46.4	-0.51279	-0.99029	0.767631	29.1048	-28.9967	-1.45245	5.78736	-1.99485	14.8219	8.59745	-9.87845	9.35692	15	14.0095	4.82933	5.88987	-2.60846		-7.3061	1.64422
46.5	-0.3344	-2.86802	-1.98343	22.6682	-29.4703	-6.5761	3.72144	-1.67134	13.1712	15.0522	-8.24178	10.9702	14.7738	17.5748	3.77886	2.62176	-2.00377		-7.04483	0.245097
46.6	-1.58573	0.248434	0.71117	16.3543	-30.962	-2.48133	5.29347	1.26735	16.1439	9.27016	-6.87947	8.32168	12.4564	14.3348	4.85127	9.14365	-6.41877		-7.57947	0.199674
46.7	1.94733	1.3735	-1.13369	14.6485	-30.2936	-6.08227	3.87184	-0.90803	14.2771	12.4858	-10.8691	9.01188	9.98992	13.7884	6.58069	3.13206	-5.07478		-13.443	2.55023
46.8	0.533582	-1.44932	0.389085	19.9325	-32.4348	-13.3557	5.98146	-0.89458	14.5853	13.4593	-8.11995	7.9137	11.697	15.4439	5.51103	-0.359736	-8.97501		-8.14521	2.18732
46.9	2.76697	-2.07186	0.293599	20.1743	-29.9072	-4.84454	5.2245	0.9157	16.4983	16.1644	-3.31814	11.9469	11.3597	14.008	7.65182	1.83107	-17.1688		-9.41536	0.396776
47	1.51615	0.19999	0.380932	17.3739	-31.684	-3.30239	4.0277	-2.41149	14.8647	10.5072	-4.441	8.80514	10.474	16.7848	9.60071	4.87922	-23.3225		-11.6346	2.91275
47.1	1.82436	0.94865	-0.28443	9.26134	-35.9553	-0.48519	5.35252	0.433684	16.8013	11.1297	-9.78768	4.23327	9.86159	12.2397	5.16333	10.1134	-8.87413		-8.85471	1.79614
47.2	0.221286	-0.04098	0.315397	24.393	-35.0413	0.329845	4.5616	-2.24658	19.1006	9.54765	-7.99763	10.804	10.5689	15.0626	5.1592	7.39428	-6.10107		-7.13985	1.53038
47.3	3.57444	-0.61655	-0.57605	25.1936	-36.0956	-7.73447	2.77449	-1.3358	14.3277	12.9229	-7.42986	10.883	15.614	16.5425	6.89827	0.765585	0.66904		-13.6908	-1.15788
47.4	3.47879	-0.03749	0.06997	19.1267	-32.1894	-1.85834	3.71722	-1.51721	16.2602	10.9143	-9.59129	10.3595	11.0455	17.0571	2.77482	3.93599	-2.751		-12.1141	0.274808
47.5	2.31315	-2.6787	0.677425	22.6429	-35.5668	-1.44439	4.29508	-2.28126	17.864	8.50701	-4.37608	6.32096	11.0846	12.5904	6.19182	4.63648	-5.12134		-11.4291	1.22516
47.6	2.86108	-2.5957	0.541392	19.3198	-33.983	-5.75871	3.44816	-2.4348	14.3775	15.9037	-10.5995	4.33573	19.1805	14.1198	4.77176	2.59118	-6.99619		-6.43258	0.65377
47.7	1.46283	-3.2789	-1.87073	25.8538	-36.255	-2.73532	4.42183	1.33552	16.1185	14.9955	-6.13163	4.94918	11.8516	10.7634	3.19599	1.55008	-16.6485		-7.41201	0.534905
47.8	2.74772	-5.02558	-0.13841	25.6619	-31.2779	0.291853	5.20562	1.72534	15.8735	14.9323	-7.34958	13.3214	20.4481	13.3434	4.39883	1.18349	-10.3877		-9.86051	0.829715
47.9	0.158138	-1.66177	-1.31505	23.0533	-33.3664	-2.81119	2.85152	2.06514	15.6314	14.9707	-8.57989	11.0523	16.9007	17.1971	4.99052	11.928	-10.7108		-12.6788	0.726692
48	1.21962	-0.43758	0.197442	44.2793	-36.7906	-5.79828	4.44393	-1.79147	15.5355	19.2672	-8.65742	11.2122	20.9962	15.8177	4.09295	3.27171	-12.1419		-12.067	0.474435
48.1	3.67658	-4.86135	-0.07359	26.6871	-34.1425	-4.38604	1.82624	-1.62638	15.715	9.87863	-5.40041	8.79051	20.8145	12.842	4.477	2.25922	-2.19355		-7.71467	0.600476
48.2	3.46356	-4.55427	-1.87622	30.1365	-32.9541	-7.59522	3.99191	-1.75512	18.6595	7.8291	-5.64562	6.55017	10.8036	18.3991	6.29683	5.48294	-2.39545		-6.26123	0.651734
48.3	1.1464	-1.21313	0.230549	22.0769	-33.175	-0.22801	2.16661	0.427216	16.2739	10.3937	-3.68208	7.35578	13.7251	15.3794	6.45304	1.21293	2.11286		-6.1559	-1.08672
48.4	0.744386	-2.04835	-0.30313	42.6833	-32.96	4.68974	2.96569	0.875838	20.0866	11.6439	-0.171625	8.10118	16.4513	16.9097	4.58072	4.97211	2.33805		-8.51952	-3.86978
48.5	2.82745	-2.21542	-0.20127	32.4103	-36.8497	0.819011	2.07338	1.05133	18.2827	10.9511	-4.08287	4.88951	14.3868	12.6005	4.98642	6.97881	6.34046		-7.80635	-0.643228
48.6	3.06107	0.572103	-0.29974	34.3427	-34.7756	5.10339	2.38535	-4.27949	15.9199	10.3718	-5.64954	13.5261	19.1971	14.2248	3.34838	6.5074	6.95362		-9.55412	-0.361656
48.7	3.19078	-1.85026	-1.77659	38.6065	-36.6008	-0.51297	1.97945	-2.04366	17.1426	10.3624	-3.60062	8.09616	12.9509	20.0923	3.86622	-1.73979	6.53523		-8.43966	-1.34063
48.8	1.87633	-2.16423	-1.55638	38.4612	-33.3993	-6.48678	2.26301	0.984368	16.0991	5.78087	-2.57497	5.18049	19.4029	18.5337	4.86669	3.67707	-1.26044		-7.10021	2.1851
48.9	4.00374	-1.30797	-0.35448	31.4595	-31.3571	-2.62944	2.01697	-0.9795	19.5258	11.4319	-4.55784	11.6209	24.1151	12.9857	5.87322	5.58324	7.96512		-9.62092	1.68841
49	-2.25011	-1.70233	-0.19546	41.3705	-35.3996	-1.75397	2.16931	0.012629	17.0337	5.8018	-2.37299	12.4701	22.5925	20.1891	3.97906	3.44283	1.26814		-7.80115	-0.818571
49.1	-0.99943	-5.25061	-0.2954	37.4125	-36.5513	-0.1319	0.540837	-3.97491	17.1974	5.89699	-8.56793	12.5333	18.3729	17.6417	3.4316	5.06927	2.8621		-10.2335	-2.09292
49.2	0.884911	-1.41139	-0.30498	31.3473	-35.7489	-3.2751	4.58472	0.37474	18.6401	11.4014	-9.29953	8.52932	18.697	12.5094	3.86374	6.56136	1.62654		-8.00485	0.9703
49.3	3.88573	-0.08424	-1.21948	30.7016	-34.197	1.29469	2.67969	-0.32717	19.5344	9.88192	-9.15094	2.70937	18.0797	10.9957	6.44091	9.99202	1.45249		-8.70088	0.506404
49.4	2.21852	-2.69009	-0.88044	39.9741	-37.0042	-5.96894	1.73486	-3.49001	16.5783	5.51884	-6.92028	8.72621	21.9954	9.91141	2.67861	4.94858	2.20986		-6.8917	-1.2472
49.5	2.11157	0.52224	-0.31792	35.4918	-33.8985	-7.66415	0.937644	1.74558	19.5438	13.6211	-8.91954	12.2866	16.5864	16.3624	5.9358	0.329479	-1.61808		-6.39535	0.00064296
49.6	-0.77211	-0.4462	-0.432	29.2757	-33.6709	-7.67559	0.768096	-3.09936	18.5549	12.561	-5.6398	9.46442	21.3398	11.4993	4.04424	-0.393821	3.78645		-10.0804	0.448161
49.7	1.26445	-0.43527	-3.02798	48.4372	-38.4101	-2.91052	3.56687	0.000172	18.0434	9.30801	-9.17092	10.2132	20.1309	12.1182	0.323966	4.00883	8.35316		-11.2571	-2.23005
49.8	0.151211	-2.01587	-0.49078	46.423	-36.3557	-0.37465	1.79115	1.10567	14.5565	2.84816	-10.1944	10.5593	20.3397	8.42421	3.21164	3.28038	5.0766		-7.79461	1.27675
49.9	1.6427	-1.43482	-0.89463	35.2108	-31.4118	3.2778	2.06871	-1.00422	14.6961	15.8252	-7.39711	9.73816	25.2821	13.0263	1.41229	1.02245	0.364027		-9.02251	-0.924236
50	-1.8233	-4.09141	-0.70699	39.3758	-37.7952	3.37147	2.71944	1.45082	19.6302	13.6039	-9.70856	10.2882	14.6681	10.8691	6.18959	-1.13008	5.33822		-6.34835	-0.931181
50.1	-0.45407	-1.40238	-1.97576	29.4123	-35.1841	-2.148	2.0934	0.556463	17.4927	6.1371	-8.82059	9.06006	18.1011	13.6175	3.65173	0.78621	-0.150893		-12.6261	2.27979
50.2	-3.87709	0.744079	-0.45884	42.612	-40.2308	-1.56705	7.69647	1.31357	17.6387	7.24444	-7.54442	10.0824	23.2459	9.74228	6.95868	-1.07562	4.09062		-10.6265	-27.4078
50.3	-1.33172	1.52282	0.923785	45.4942	-36.9753	-4.40202	4.07673	-2.36425	14.6612	14.0084	-6.12456	12.0524	23.6791	11.9141	7.23646	-3.55129	5.11361		-9.97575	-11.3774
50.4	0.138488	0.448563	-2.72124	38.0326	-34.0641	-1.46323	2.93029	0.674998	16.4224	4.6536	-7.97739	13.502	21.3421	12.9167	2.33787	0.762882	1.41163		-12.755	-4.48759
50.5	0.937813	-2.89942	0.181479	41.1184	-38.4797	1.49821	4.40532	-1.27222	13.5359	7.30922	-9.15556	11.5018	19.505	10.2132	4.47268	5.72263	4.0639		-12.9497	-9.27002
50.6	-0.93625	-3.10806	-1.79915	51.131	-38.4971	3.74647	4.21055	0.520605	19.2192	10.2275	-5.86179	7.29719	22.0151	11.7449	2.69383	5.06376	3.32296		-11.4217	-8.86076
50.7	3.57076	1.44192	-0.64275	51.8748	-36.8823	-5.21861	1.86838	-0.33515	18.3056	9.51151	-5.79243	8.44271	17.2581	10.742	3.74858	5.58497	-0.340023		-11.1691	-6.62188
50.8	0.70871	1.27468	-1.41814	48.4878	-37.5843	-2.2218	0.836942	-0.02943	18.853	7.34968	-5.58859	9.02895	19.4641	8.52021	5.68614	5.26472	2.90312		-11.7523	-5.89546
50.9	0.227047	-0.02815	-3.24833	50.0698	-36.2136	-7.18061	1.8047	-1.5833	17.2685	10.8432	-7.01167	8.71082	20.821	13.211	4.49454	3.8641	8.09887		-9.85483	-8.87728
51	-0.24369	-0.78264	-1.77338	40.3986	-37.5089	-5.09542	3.68807	-0.01931	20.136	7.25806	-12.5954	10.6665	21.1336	11.4368	4.18925	2.86657	4.4177		-12.932	-6.57232
51.1	0.253647	1.37573	-2.39525	48.2932	-40.7747	-5.91477	4.78585	0.391736	17.899	8.99653	-9.58444	9.33926	24.8533	9.56826	5.47527	4.29518	3.98599		-10.0846	-6.67121
51.2	-0.3615	1.64553	-1.9174	46.5852	-37.7754	-10.6981	0.581945	0.891643	16.0063	15.518	-11.2065	7.74674	23.8259	12.1179	3.6735	-1.597	7.96129		-16.607	-3.99372
51.3	0.047278	-3.14193	-2.73959	68.6189	-40.452	-19.2612	2.97811	-0.61212	20.6478	6.48581	-12.7444	12.3867	23.2925	9.01808	8.86376	8.20487	0.355502		-12.4924	-5.03277
51.4	0.728517	-1.26257	-3.91171	74.4354	-38.3815	-8.53652	0.420788	-3.02436	17.616	6.58804	-6.67937	5.8949	19.5646	11.8224	6.01635	6.71008	2.17632		-13.1512	-6.6352
51.5	1.2945	-2.1527	-2.60298	59.4761	-37.1041	-7.17702	0.204328	-3.2027	19.4282	11.2501	-9.97642	10.0073	21.8708	9.52822	5.44063	7.30355	3.36014		-10.2868	-3.36301
51.6	0.676031	-0.98789	-1.30283	64.0681	-38.4214	-8.09188	2.36585	-1.01398	14.7014	12.801	-12.8084	9.67222	23.1568	9.84303	7.29425	4.7264	2.40059		-12.8387	-1.67628
51.7	0.26309	-0.8852	-0.5828	68.5445	-40.5144	-4.41415	3.7201	-2.61027	17.1478	5.57301	-7.7289	8.21721	18.6975	12.1807	6.20268	7.90267	0.951837		-12.6883	-5.07829
51.8	-0.93358	-2.55142	-1.78277	39.8008	-41.5461	-7.18634	4.89771	0.672606	19.0746	11.9478	-7.67588	6.17679	12.9594	13.1553	1.50328	5.02299	1.2026		-12.0938	-3.58909
51.9	-1.72507	-0.6234	-2.55701	36.6435	-40.0208	-7.88146	-0.55002	-0.75111	17.7383	14.6406	-4.62151	5.97198	19.8007	6.9892	4.97432	-0.83512	1.87186		-7.59582	-2.9398
52	-0.67729	-2.3544	-1.59532	25.2391	-43.2197	-5.73428	0.536946	-2.22061	19.4344	7.89791	-9.97631	6.73098	18.9072	13.1526	4.04272	5.27299	2.18278		-12.9946	-2.87493
52.1	-4.4241	-2.81961	-2.28124	30.4431	-43.2023	-4.62832	3.52444	-5.79078	18.3263	5.50923	-5.94573	7.49143	18.2197	14.4792	4.92937	3.00879	7.25887		-14.2559	-0.186067
52.2	0.98528	-1.56633	-0.17329	37.1226	-41.8533	-5.68459	-0.24915	-1.94328	16.2637	6.58544	-12.9599	10.5918	13.5855	14.1383	4.58301	8.97399	8.84754		-14.5739	-2.87503
52.3	0.937385	-1.31288	-2.9998	23.8894	-41.6336	-2.1796	2.76528	-3.3672	12.8572	11.4611	-7.61775	10.5011	15.4228	9.361	8.08047	5.44903	1.04389		-11.958	-4.56084
52.4	-1.07612	-0.29818	-1.15484	24.0415	-41.9822	-4.26626	0.41027	-3.49939	18.4996	6.34296	-6.64652	7.64176	18.0737	8.99468	3.29966	1.55439	-2.65159		-12.9379	-1.28572
52.5	0.254507	0.67297	-3.02456	29.6966	-40.0239	-1.88197	1.58843	-4.46844	16.0616	7.85607	-1.48013	8.72858	23.4915	12.6618	2.26078	5.13644	-7.20602		-10.4763	-2.11059
52.6	0.432583	-1.53001	-0.26591	44.9447	-38.6186	-9.92878	-0.13279	-1.49349	14.4368	4.8809	-9.32926	9.05928	12.2426	11.1015	5.07896	9.54064	-0.61694		-9.89927	-1.15194
52.7	-2.69573	-1.57766	0.845541	45.1048	-39.1616	-9.94691	3.76359	-2.98336	19.0744	6.60101	-4.18101	5.44551	10.8541	11.3957	3.18079	6.30408	2.07763		-11.7357	-0.174653
52.8	-1.23355	0.40667	-0.24003	44.0512	-38.8132	-0.09719	1.9787	-0.71644	13.8297	1.20379	-8.40991	8.94713	8.76154	8.96733	4.21232	-4.42259	1.31028		-10.9334	-2.37958
52.9	1.15208	0.103873	1.26603	40.0001	-43.8201	-10.2023	0.295435	-2.72012	15.7195	9.63942	-8.31389	3.77945	14.9364	13.3983	3.50723	3.72338	2.06876		-9.85158	0.844226
53	-1.32838	1.25686	-0.45123	31.2372	-43.4307	-6.96622	0.90691	-0.0825	17.1359	4.49181	-7.61771	8.51806	8.39338	10.3803	-0.724647	-0.999629	5.55625		-7.55793	-2.44871
53.1	-2.3616	-2.68	0.136328	45.6216	-43.7059	-10.5809	2.92204	1.32335	16.0794	13.7892	-9.54943	4.65033	11.5822	9.3347	1.54516	-5.39553	5.91493		-11.8412	-1.09832
53.2	-2.1065	-2.30682	-2.4197	43.0206	-44.8954	-24.8976	-0.83494	-0.8819	20.9863	7.32261	-8.16685	9.46898	10.0084	12.8372	2.67459	-7.26294	-1.67738		-9.01745	-2.60357
53.3	-2.40092	-2.00052	-0.51535	39.728	-39.6818	-12.0118	2.95768	-0.14326	18.6722	5.75007	-5.12131	4.40653	14.2184	6.36717	5.00822	-4.80282	-2.21909		-5.98091	-1.17777
53.4	-0.30979	-3.12648	-0.43322	46.9036	-41.1806	-20.6351	0.784477	-1.08265	19.2484	11.4862	-8.52346	5.40702	8.68827	10.6795	0.887674	-3.95624	2.82491		-7.71645	-1.61622
53.5	-1.57078	-0.47366	-1.8292	44.51	-42.7392	-18.9724	2.18539	3.19297	21.4247	5.60033	-9.31863	5.46717	10.0799	9.40454	1.48647	-8.05056	3.24138		-11.1942	3.16108
53.6	2.04012	-0.79722	-1.41425	53.7641	-43.9119	-6.56544	-0.36182	-2.78744	17.6883	7.24335	-9.20525	-2.2167	9.62377	9.97531	-0.563922	1.02764	0.395054		-9.56654	-0.356964
53.7	-1.37738	-1.32534	-0.77438	53.7216	-41.9698	-16.2517	-0.20745	1.89539	18.7573	3.37516	-11.2539	4.98286	7.95171	14.8362	2.44479	-3.36747	2.04509		-8.87382	0.1871
53.8	0.578891	-1.24711	-2.96276	54.6256	-44.5179	-7.53584	2.35424	-0.6076	15.738	3.66061	-8.8045	4.45356	10.229	11.3826	1.10817	1.81213	4.15176		-7.31898	-3.44663
53.9	1.49493	-1.85661	-1.67525	53.1384	-39.7385	-7.53114	0.493267	1.73482	16.3824	5.308	-11.3274	4.63372	8.89753	5.02459	2.65645	-3.87589	6.01795		-12.3199	-1.67973
54	-0.90088	-3.33608	-2.07788	41.772	-41.7541	-13.6792	1.69385	-0.1449	17.1132	7.85072	-8.24549	7.19582	10.3102	9.39425	2.43831	0.720207	4.42221		-12.0947	1.54791
54.1	0.218269	-2.60195	-1.90715	40.9478	-43.5643	-10.0381	1.27555	2.76461	15.9744	7.41404	-9.53883	7.90531	9.52764	9.75186	1.59849	-2.51147	8.36326		-21.5834	-2.14157
54.2	2.09343	-1.10228	-2.15969	45.3686	-42.6764	-16.6057	3.48179	-0.29881	17.0799	3.04106	-8.01183	4.12543	11.7831	13.503	4.82936	-0.152057	4.13083		-16.4592	0.531951
54.3	-0.21162	-2.18667	-3.25596	42.0605	-40.5315	-14.1471	2.41058	1.76638	15.9623	1.48683	-8.28879	8.24437	7.23004	13.224	2.96906	4.80139	4.95635		-15.5568	-0.954015
54.4	-1.90841	-4.12954	-2.98863	37.6485	-45.8036	-13.7547	4.17883	0.288781	17.7792	2.22633	-9.81866	3.6405	9.09323	11.0471	1.30721	-5.29749	2.50431		-25.9815	1.80524
54.5	-1.35717	-2.21504	-3.05323	42.3084	-46.4399	-15.6763	0.833625	-3.71586	18.4261	8.54127	-5.51573	4.1818	9.76611	15.1107	1.42816	-8.37828	5.37697		-25.6563	-2.53549
54.6	-0.82291	-4.62711	-1.76603	37.7588	-43.2527	-14.923	-0.5502	0.452085	18.9591	0.690071	-8.12294	3.94958	9.92341	8.44507	3.14489	-4.8507	8.02353		-22.6863	-1.93796
54.7	-1.25311	-1.39492	-1.36604	37.9671	-43.412	-10.0352	3.96901	0.653716	16.5492	9.06271	-6.6527	5.25446	11.0469	12.8318	2.60653	-8.07781	8.37876		-18.2011	-1.53814
54.8	-2.14478	-1.93485	-3.61762	41.0983	-45.1412	-8.51883	1.72287	1.69162	19.328	2.08517	-6.30827	6.16323	8.64627	16.5929	0.719992	-5.49778	9.01423		-24.587	-1.99284
54.9	-2.56987	-0.55227	-2.67526	41.5021	-45.3745	-10.3368	2.48015	-0.10725	19.1845	2.31124	-6.92889	3.07539	7.88534	10.3129	1.56001	-4.3713	5.70509		-19.1205	-1.10983
55	-1.13228	-0.40951	-2.70941	38.3434	-45.1841	-9.91525	1.77912	-1.07702	18.5263	4.38938	-6.23153	2.5227	8.95703	9.86486	4.53375	-6.17718	5.40442		-28.4018	-2.81305
55.1	4.3901	-3.15336	-1.95063	50.9721	-42.5047	-22.1303	0.16271	1.54116	17.8755	-0.266014	-12.3474	6.25128	9.50627	10.562	3.8028	-10.3165	9.55511		-5.87438	-0.883509
55.2	-1.10246	-0.40662	-3.02606	51.7561	-41.8649	-11.0812	0.057302	0.448553	19.42	-3.14823	-12.8671	8.49708	10.5246	11.9477	-0.330588	-5.7922	10.327		-11.6611	-3.43257
55.3	0.40283	-1.95474	-2.65405	38.0066	-46.4147	-9.63861	1.7939	0.931346	18.9428	2.91095	-9.51888	6.00345	8.28311	13.2302	2.57344	-8.19449	9.44095		-16.256	-3.25979
55.4	0.359868	-0.59828	-3.4345	39.3982	-43.0556	-14.9655	-1.46257	-1.2618	16.9716	5.77011	-8.75159	7.41533	8.35317	5.39874	2.85484	-7.29201	5.13899		-12.297	-1.92403
55.5	0.100078	-4.21618	-3.59926	32.544	-43.2862	-20.227	0.027482	0.471883	19.6269	0.458005	-8.69897	10.9792	7.07856	11.3805	1.11502	-7.45039	6.29074		-10.2974	-1.72371
55.6	0.547469	-0.49164	-3.64324	31.6829	-44.6276	-31.9451	0.486223	0.464942	23.2453	2.64309	-6.94535	6.55222	7.8023	9.90751	2.43475	-11.0357	8.27293		-10.2365	-1.61898
55.7	4.41555	-2.64228	-4.35138	41.2225	-43.7316	-12.4137	-0.10405	-0.18727	27.8283	4.17036	-7.90194	5.89877	9.13331	11.5631	1.30939	-7.68631	7.29943		-15.815	-0.355756
55.8	-0.41866	0.071038	-5.30005	40.8613	-40.9048	-12.56	-0.32298	0.863496	17.655	0.946425	-5.47498	5.54797	9.4505	7.55089	6.79735	-6.24161	6.2972		-17.4385	-2.77891
55.9	-0.90871	-1.96613	-3.52402	41.2056	-42.6021	-10.0694	1.20129	-0.05342	16.6453	5.61898	-7.38035	1.25095	11.7469	5.50854	3.70736	-6.39576	3.94486		-28.2767	-2.38098
56	2.37568	-3.90163	-4.45091	55.7056	-43.62	-4.02906	-0.80977	1.63304	19.5648	-0.204268	-9.87344	1.38239	7.27301	7.88437	4.32389	-6.68452	6.54474		-23.0802	-2.68123
56.1	1.54296	-2.94324	-2.33408	65.4564	-42.6965	-0.04401	1.70192	1.69048	18.0816	5.09409	-8.75943	3.11537	8.70063	11.9711	2.23459	-4.2071	6.64999		-20.6622	-0.925749
56.2	-1.26699	-1.33187	-3.83098	54.1818	-48.8418	-4.3708	2.89655	1.73992	17.0635	1.03582	-5.8779	1.99358	7.77966	8.79155	3.14945	-8.19706	9.62108		-28.3622	-0.357107
56.3	2.36575	-2.13642	-4.56096	44.9121	-42.6771	-1.27378	2.72119	1.2285	16.4632	-9.16443	-10.7226	0.684842	8.12271	8.4633	3.34633	-6.01688	8.19974		-24.3248	-2.51303
56.4	0.824575	0.10231	-1.10478	67.409	-43.0652	-3.91524	-0.03209	0.51737	18.1648	4.12068	-8.11721	2.66837	5.93694	12.8613	3.1391	-7.37918	10.3824		-17.5085	-3.39598
56.5	-1.00046	-2.82894	-3.67505	54.9918	-45.2594	-10.9749	1.518	2.01804	21.4443	1.33581	-8.69995	7.59499	8.885	12.7214	3.81118	-5.07209	7.2814		-19.0297	-2.13829
56.6	-3.51128	-2.36526	-4.29667	53.0261	-42.2779	-8.16888	0.580901	0.82359	19.1868	-0.862449	-10.5167	-1.59807	8.1666	11.261	3.80862	-2.75836	4.46619		-22.5934	-5.33422
56.7	0.652849	0.33107	-5.55955	71.7673	-46.7811	-11.2846	-0.5341	-0.80614	19.7443	-2.80359	-5.41522	-1.31229	7.76392	12.2409	4.07514	-4.545	6.87861		-19.8299	-1.19379
56.8	2.73177	-1.66187	-3.74569	58.7777	-44.8334	-11.5109	0.697743	1.01174	21.668	5.435	-4.18711	4.2013	5.63873	11.8717	3.15342	-2.05548	8.70519		-26.123	-0.18202
56.9	0.675178	0.441439	-3.77256	67.3593	-43.2744	-7.07193	-3.11524	-1.89482	19.4741	0.898601	-5.51394	0.545517	4.83246	9.66441	1.64837	-3.72469	6.39432		-18.1346	-3.5745
57	-0.31196	-2.39884	-3.00157	60.8318	-47.4258	-10.4142	0.845863	-0.93797	18.4125	0.750235	-7.24566	0.17478	8.535	12.8967	1.33087	-6.5166	10.2049		-11.1085	-3.90752
57.1	2.44121	-2.59635	-2.47474	63.0161	-45.1098	-8.68563	-0.08618	-2.3151	20.6979	1.31028	-6.44633	-2.31948	10.531	9.70743	1.81296	-4.80759	7.90786		-21.6574	-0.638386
57.2	1.36402	1.23414	-3.42631	63.2306	-43.2853	-8.41399	1.83297	1.1411	19.3401	0.944014	-6.55044	1.70742	4.42113	11.5899	2.14991	-3.42396	7.32164		-20.6538	-3.01309
57.3	0.615943	0.656942	-4.56645	64.2813	-44.1738	-12.6769	-2.59926	1.55308	17.0858	0.779111	-4.5312	-1.14411	8.21801	7.81292	0.458367	1.16584	10.0243		-21.2335	-0.633143
57.4	-1.73701	-1.41496	-1.21882	65.4315	-45.3096	-8.35587	2.07075	0.863495	18.312	-1.1412	-10.2589	2.18871	8.57352	9.15893	4.43527	-4.41257	7.27285		-18.0105	-2.97704
57.5	2.06568	-0.42701	-4.28747	53.3138	-45.212	-8.00317	-0.23363	-1.25538	15.2778	-1.39511	-9.35745	-4.5395	6.27444	10.1707	0.0153756	-3.93046	7.80536		-21.5037	-0.876374
57.6	-0.46976	0.014404	-3.30424	63.8663	-45.8206	-7.91216	1.94574	-0.24391	16.9118	-4.80174	-6.06508	1.93831	8.96586	11.2987	2.95829	-4.19076	8.48585		-24.0972	0.444969
57.7	-0.08906	-0.34995	-4.15779	71.5052	-43.3733	-7.09073	-2.28346	0.557849	18.6842	6.75061	-10.361	-0.166164	6.22855	12.4171	2.15947	-5.23177	7.83091		-28.1425	-2.14808
57.8	-0.48334	-1.29867	-5.26549	70.7728	-46.9381	-5.25751	-0.00666	-1.91561	18.8163	7.96559	-6.24089	-0.764817	8.89828	12.6978	2.24715	-5.85135	8.80303		-16.2686	-1.66959
57.9	-0.32081	-2.61834	-3.89349	60.498	-45.1702	-2.0313	-1.71288	-1.54425	19.7151	2.17045	-7.36271	0.561423	14.9512	10.7592	2.96883	-2.76887	3.725		-22.8551	-2.51899
58	0.63738	0.918459	-4.80958	64.7467	-46.6102	-4.58047	-0.26648	-1.80926	22.8437	-3.75024	-10.2751	1.21733	7.31482	10.0443	4.6089	0.023704	6.84371		-21.8005	-4.58197
58.1	2.44075	-0.61499	-4.87779	67.6332	-42.6761	-6.89169	1.75149	0.366525	17.8918	0.945868	-7.43826	3.359	11.3275	11.9699	0.462046	-2.29261	8.18724		-27.3651	-0.256498
58.2	3.05567	0.10115	-2.21968	61.6722	-42.8412	-12.4621	-2.1627	1.87729	17.9307	1.89053	-8.4109	-15.3083	10.7595	8.24223	1.14138	-0.30613	9.85634		-26.6493	-4.34083
58.3	3.24636	-0.24894	-8.58726	49.4303	-48.4699	-9.11408	-2.30125	-0.29189	17.1936	-0.102659	-10.5638	3.55415	10.3062	8.1228	3.61928	-0.505371	2.95394		-22.3039	-3.83033
58.4	2.24596	0.197526	-3.41622	57.6999	-48.5656	-12.2874	-0.86903	4.78175	16.9842	-1.01933	-5.07121	-0.507462	12.0068	12.4741	1.28103	0.320675	9.2527		-23.579	-3.61537
58.5	3.80703	-3.61093	-4.4984	57.5662	-46.4764	-10.7955	-0.44249	0.727112	16.6562	5.20525	-6.46679	-11.8755	12.1325	13.3472	1.54788	-1.13353	11.5141		-21.0338	-3.71562
58.6	1.39562	-1.49502	-4.07073	57.7575	-46.1987	-10.2842	-4.20248	2.84732	16.6284	-1.49418	-7.5036	1.40486	12.1125	8.29642	0.490261	-6.37775	5.45985		-26.4241	-3.23059
58.7	-0.32062	-0.79728	-4.47463	51.0111	-43.9873	-13.3	-2.71411	-2.69513	17.7593	-3.12924	-8.9647	0.621406	11.1638	4.57722	2.9824	-1.55973	2.62802		-27.88	-4.87952
58.8	0.480487	-2.44952	-3.21093	44.1848	-46.2933	-12.797	-1.78387	0.239187	15.9486	-1.41308	-13.4274	0.75935	13.3944	10.6841	0.430712	-6.6178	8.1937		-12.2576	-1.39323
58.9	1.46102	0.762216	-4.39689	50.8438	-46.1936	-13.1496	-0.98704	0.803353	16.6963	-3.75648	-6.67135	-3.25416	13.7651	8.68643	2.53386	-0.495768	10.4897		-27.14	-0.428156
59	-1.92963	-2.21759	-3.55019	39.4447	-43.8749	-8.94019	0.71898	-2.09136	18.063	3.73934	-6.99955	-2.40185	18.2261	8.58202	1.74564	-2.34713	7.83639		-23.8858	-0.585946
59.1	1.15339	-3.67592	-3.61703	42.5192	-43.7539	-10.4833	-2.82882	-2.90726	18.6134	-2.31558	-8.40092	3.13427	11.878	9.1319	1.23359	-8.67806	9.20146		-24.3881	-4.44847
59.2	4.28279	-5.15506	-3.65422	43.7572	-40.6471	-11.1056	-1.02874	-1.5381	17.5605	0.214839	-6.09163	0.104205	10.8598	13.5051	2.11559	-2.35911	9.09019		-23.5994	-3.66318
59.3	0.499531	-0.54288	-4.7366	44.6373	-45.8035	-10.8612	-1.51656	0.188063	16.8158	11.5852	-9.958	-0.674624	14.3959	6.61409	3.36939	-7.50518	5.94792		-30.9564	-1.15915
59.4	0.992724	-0.03687	-4.04502	44.84	-45.91	-10.055	-0.67359	0.133935	15.5809	-0.429112	-11.3611	-4.41322	16.6774	11.6544	0.9002	-3.99462	5.97638		-24.9686	-2.46061
59.5	1.31661	0.403143	-5.29007	53.795	-49.2937	-6.40983	-2.56098	-0.50547	18.6647	1.4236	-7.29554	-5.68016	20.1607	11.4229	1.0025	-2.00813	7.74522		-26.962	-1.75883
59.6	1.32155	0.9946	-5.19345	62.017	-46.3352	-10.5418	-2.83281	0.23815	17.7692	1.32117	-12.2071	-1.43265	18.3025	2.93946	3.54955	-7.15859	7.89606		-20.2035	-1.63614
59.7	0.971353	-2.43773	-3.99013	50.2661	-47.2945	-6.33803	-2.72469	-1.12176	17.997	-6.85796	-10.4045	-0.132639	8.45106	10.9984	0.21127	-7.629	10.3563		-20.4819	-2.3827
59.8	5.42792	-2.42003	-4.29472	48.2781	-45.9545	-11.0599	-1.55639	0.952536	18.3249	-4.33153	-11.8	1.10759	11.8978	10.7878	0.986562	-5.65167	12.8891		-16.7012	-1.53373

## Sheet: Figure 4J-K
Figure 4J: Peak Current (pA)
PV-Cre; tdTom	Pvcre::MOR
31.3817	35.4662
9.16806	48.5448
26.5016	46.9292
39.2237	56.8283
33.898	27.4618
14.4844	90.3688
19.6301	78.0757
13.6763	76.1544
12.167
3.54686
26.4112
1.10176
35.482
19.6229
Figure 4K: Tau (ms)
PV-Cre; tdTom	Pvcre::MOR
738.845	662.577
751.181	560.215
298.19	203.571
1009.74	465.884
970.012	650.271
1188.81	162.656
848.712	373.129
501.101	296.171
1290.3
