# Supplementary material for: Convergent, functionally independent signaling by mu and delta opioid receptors in hippocampal parvalbumin interneurons
Source: eLife. 2021 Nov 17;10:e69746. doi: 10.7554/eLife.69746 (PMC8716102; doi:10.7554/eLife.69746)
Supplement: Figure 5—source data 1. [file elife-69746-fig5-data1.xlsx]

## Sheet: Figure 5A
Time (min)	Current (pA)
-2	2.18823	12.6073	35.3485	0.605526	-0.294052	-30.5331	9.35447	12.9289	4.50758
-1.91667	1.12829	11.8331	31.1735	-1.22266	-1.52678	-33.0194	8.32661	9.13876	3.2851
-1.83333	-0.55024	11.0523	28.3973	-0.40945	-3.71538	-30.9247	10.2516	6.78942	-0.58593
-1.75	2.11651	8.07569	21.7334	0.98505	-1.43304	-32.0096	11.937	4.86148	-3.74848
-1.66667	2.52575	9.22971	22.7023	2.57717	-0.124878	-29.2783	9.90879	2.58865	-2.2924
-1.58333	-2.10535	7.14194	21.4947	2.8041	-0.863144	-30.711	7.75074	3.79071	-2.2371
-1.5	-4.6145	5.30162	22.3113	2.47409	-1.36191	-33.9554	11.8297	6.65857	-3.48766
-1.41667	0.202329	5.85273	17.1261	2.10707	-1.11827	10.0125	8.28474	3.94384	-3.48654
-1.33333	-2.0116	2.79223	16.4522	2.3986	-0.763123	11.7357	5.93119	4.17468	-3.2845
-1.25	5.57318	-0.57525	16.2974	5.49179	-3.07912	6.33924	1.13099	-0.14878	-2.29756
-1.16667	3.59826	-2.06526	17.9954	4.83734	-2.18018	4.36259	-2.38579	-2.90952	-2.42367
-1.08333	-0.24811	1.97875	14.3889	5.91304	-2.87306	3.78996	-5.07989	-6.66153	-0.3374
-1	3.031	3.0938	13.0822	4.62263	1.37415	0.752331	1.22483	-7.8548	6.4592
-0.916667	2.2279	3.0756	10.7794	2.6183	3.60446	-1.65258	3.04383	-3.85791	-0.84282
-0.833333	-0.90381	0.010808	10.0962	1.40306	3.11827	-4.56069	2.80247	1.02722	1.03798
-0.75	-0.96021	-2.7872	8.18376	4.5442	-0.976807	-3.3279	0.858621	3.73639	3.56379
-0.666667	-1.26642	-3.08904	9.27846	1.19636	0.472137	-3.03188	0.322488	0.960232	2.16495
-0.583333	1.67419	-0.23745	8.04659	-0.192119	-1.91077	-2.74266	0.221566	-1.10617	2.87057
-0.5	0.344968	0.579045	8.1523	-4.19527	-1.69891	-0.76061	-5.70837	-4.90683	3.22959
-0.416667	2.19348	0.950192	5.16916	-7.99387	-5.0403	-1.07616	-6.86629	-6.35913	2.99014
-0.333333	1.25189	1.38463	1.79819	-6.29539	-2.43202	-3.08358	-12.1605	-11.1186	2.1388
-0.25	-0.50104	1.86386	2.48348	-9.50132	2.73938	1.12031	-13.5828	-12.1998	1.54479
-0.166667	1.00226	1.49035	2.02507	-7.15591	3.68649	0.935039	-13.352	-11.2884	1.73228
-0.0833333	-3.11048	0.9008	-0.10452	-4.5225	7.65405	-3.47765	-15.4604	-8.89322	1.10134
-8.00005e-12	-7.90369	-0.34616	-4.75053	-3.08983	8.7428	-11.0918	-18.5837	-11.2499	-2.17682
0.0833333	-5.55115	-1.62947	0.269854	-2.0514	11.2953	-4.24212	-18.7455	-15.2166	-4.91765
0.166667	-6.56696	-2.30358	0.046939	-0.482784	9.93999	-5.13805	-25.1922	-18.5884	-4.48787
0.25	-7.91474	-2.86967	0.177127	0.176983	11.2507	-1.74132	-14.5984	-13.1839	-1.14321
0.333333	-10.3178	-0.55952	0.703433	2.3512	10.25	0.640331	-16.8663	-9.2117	1.04974
0.416667	-10.3607	23.2251	-2.44795	1.2064	9.40944	0.909801	-15.5954	0.981259	2.68283
0.5	10.0475	35.9505	-1.73616	2.41175	8.16296	14.5003	-12.5246	26.415	2.49841
0.583333	41.5955	40.792	1.53507	3.45277	8.88797	27.5446	6.18717	50.4534	2.53175
0.666667	62.3298	41.2601	15.0308	4.79524	23.1843	39.1708	18.224	66.5123	5.08966
0.75	72.8765	44.0349	30.2504	5.69607	44.3376	41.2848	28.6217	65.0876	10.2688
0.833333	75.554	43.3591	40.8327	7.98829	60.6079	41.7089	34.824	66.37	8.19198
0.916667	73.5466	43.1872	53.6163	12.2596	71.7311	48.4507	39.8422	71.6164	11.0286
1	73.5355	43.2546	63.0866	25.7415	74.4997	63.5439	44.525	74.3636	10.2371
1.08333	70.4437	37.9349	68.2063	44.4517	78.4289	68.5998	43.9311	76.7708	11.158
1.16667	68.0219	31.6498	69.0491	57.0933	78.5609	71.7096	42.581	77.1418	12.9549
1.25	67.5524	28.4683	70.3384	66.7	77.5288	69.5727	36.0281	79.7143	13.7739
1.33333	65.5903	27.3555	68.7947	70.6583	74.4158	70.7242	38.9938	76.6564	15.7486
1.41667	58.243	27.6415	67.1078	73.026	73.2731	71.8831	37.2286	76.8871	14.7951
1.5	59.3799	26.9278	66.6814	73.8456	71.9569	78.0243	42.7894	69.2794	17.1285
1.58333	57.2874	25.4746	67.8519	75.2925	68.7032	82.5748	37.5063	62.8814	16.4249
1.66667	55.5061	21.6753	65.4923	71.9071	64.668	87.3177	46.2601	57.798	18.7417
1.75	51.7898	21.2918	62.3384	72.3231	61.3532	87.054	40.5917	53.1419	18.9117
1.83333	48.5339	16.5612	61.7478	69.4571	60.0539	95.9087	38.953	49.5972	21.9373
1.91667	46.4537	19.631	62.2925	69.6698	50.7095	95.5268	35.1517	46.5189	21.7572
2	42.1204	20.4974	61.0678	72.433	41.8025	93.0712	31.7333	34.2683	21.7504
2.08333	44.7043	12.1273	61.0837	68.1309	41.8964	94.9881	30.244	41.2575	21.9217
2.16667	42.4371	12.0382	58.6202	65.4184	38.7445	93.5522	26.9214	45.742	23.2552
2.25	38.7889	12.8452	58.3616	64.3866	39.7044	95.4205	32.6532	46.2739	25.7106
2.33333	37.3218	10.6871	54.5783	62.1467	39.1683	87.5713	28.1821	46.7357	23.9147
2.41667	36.9056	11.2098	52.0794	59.6918	42.5463	83.1518	27.2254	41.5443	24.8326
2.5	33.5809	10.8078	54.2799	61.2374	47.2772	76.9885	24.404	38.8104	25.3554
2.58333	31.1735	7.23396	53.4401	60.474	49.0319	81.5363	21.2335	45.7497	25.6236
2.66667	28.5413	6.23751	52.6583	59.5476	40.9832	67.8522	22.1547	46.6445	25.2575
2.75	26.5859	4.98394	54.104	60.5731	62.8438	77.96	16.9087	37.682	25.1055
2.83333	25.431	2.08666	57.1494	60.0212	53.5049	81.8664	20.1803	32.1085	27.1361
2.91667	23.7905	4.01198	57.5605	59.8434	52.1125	81.9619	13.3969	31.2988	27.0066
3	23.0026	1.49067	46.7637	60.8465	49.0874	84.1369	16.7391	29.1525	27.4618
3.08333	22.1108	-6.9657	43.3055	61.8306	42.9295	76.9273	18.975	24.9758	28.4508
3.16667	18.5478	-17.8585	50.7933	59.581	38.9491	73.1141	15.8076	20.6427	27.1769
3.25	15.3307	-21.0643	50.3959	58.5938	37.3287	70.8706	17.3052	18.6327	26.5112
3.33333	13.8768	-13.0334	48.6057	56.5223	32.1303	66.5541	3.93095	14.7461	26.7461
3.41667	9.65448	-11.1748	49.3102	52.056	29.9046	65.6097	10.5736	12.1065	28.2985
3.5	8.24847	-6.03899	51.1371	51.7253	29.3961	63.5814	6.38004	4.36453	26.3318
3.58333	5.82635	-2.1161	50.0262	51.4082	28.9434	65.7178	6.79322	-4.41001	27.2794
3.66667	8.64624	-5.34635	48.1551	48.6733	28.1622	62.0279	3.60011	-6.88007	26.8937
3.75	7.49359	-8.70455	48.9313	48.4022	29.9846	61.9058	9.27464	-13.627	29.0345
3.83333	4.78717	-9.471	45.4057	44.9975	29.0405	59.1771	6.07874	-19.3558	27.4141
3.91667	1.78796	-6.2401	44.8007	42.4597	25.476	60.8822	3.43363	-18.7167	27.3991
4	1.36059	-7.67433	46.0694	43.6708	28.2218	57.8695	5.49729	-20.7932	27.4992
4.08333	-2.88459	-6.25132	44.5152	42.3956	27.0094	57.904	5.04829	-17.3273	26.894
4.16667	-2.5658	-0.43845	43.7696	39.5825	28.4611	53.7397	6.76966	-17.1461	27.4223
4.25	-2.41388	2.12446	47.1054	33.7987	28.9906	47.6342	6.43168	-18.2119	24.0999
4.33333	-3.12805	4.25454	45.872	33.1095	28.3054	40.5102	5.1663	-23.4693	23.5319
4.41667	-1.31293	2.37083	44.5241	33.253	28.9447	41.9134	5.60697	-31.9242	23.273
4.5	-1.8407	5.14119	41.8987	33.7229	30.6057	47.8294	-1.2889	-32.6474	22.5681
4.58333	-2.37744	5.9702	41.2468	34.0482	31.0099	36.7276	-2.4125	-31.7322	17.3934
4.66667	-5.02997	3.78734	41.7495	33.482	31.2145	34.3675	2.97443	-29.2853	19.156
4.75	-8.68604	4.02948	41.347	32.7882	29.0118	33.9258	5.843	-30.8816	19.8237
4.83333	-10.2128	6.88526	42.3801	32.0271	28.4635	30.4689	12.5554	-28.9628	21.6403
4.91667	-12.6013	9.5171	42.097	26.0648	28.6875	25.8142	11.0797		21.8206
5	-4.53113	7.12787	41.2716	22.4654	29.9119	20.5959	4.68665		22.133
5.08333	-6.61646	7.28786	39.5822	21.0225	32.0106	24.6778	3.15836		23.5373
5.16667	-10.0814	5.64533	40.3662	19.3163	29.6575	26.1382	5.5185		25.8388
5.25	-12.2354	7.10968	39.4585	17.3596	29.4515	29.9959	6.4289		25.3182
5.33333	-13.6375	1.67122	38.1762	16.8333	31.1987	32.0557	13.7235		23.6715
5.41667	-15.9782	3.19135	38.1612	14.066	32.1565	35.1853	5.90489		23.1943
5.5	-19.8441	3.9469	37.6264	12.7896	33.8343	39.3827	1.6435		24.908
5.58333	-19.5209	2.58425	37.5571	11.3763	35.0661	36.4532	-1.02019		23.3208
5.66667		0.435216	35.5353	11.9894	35.0857	34.5531	-5.62282		21.2069
5.75		1.92823	35.3817	8.00569	36.399		-4.93954		21.6071
5.83333		0.90762	34.0624	7.06164	35.525		-2.74868		20.4666
5.91667		-1.67494	34.6406	9.86651	37.0539		-5.98791		21.2922
6		-4.54512	31.8066	9.50268	38.8348		-5.51147		21.2355

## Sheet: Figure 5B
Time (s)	in DAMGO									in CTOP
0	4.1774	-0.55599	-0.18813	2.11628	-3.4539	-1.52127	7.50474	-1.53994	8.19951	7.10973	2.36663	-0.97929	-0.73728	-3.64619	-2.80048	1.23033	-2.02653	-1.73304	3.72348
0.1	-0.80355	-1.83997	3.79273	4.60547	-1.504	1.61832	3.09317	2.02239	-0.30096	7.90738	1.78706	-0.74333	7.40811	-1.39627	-5.71411	1.33867	0.85291	1.31555	1.55286
0.2	2.95411	-7.05884	2.50301	3.33204	0.507508	0.600111	1.19889	-0.98954	1.08043	6.15198	-0.11168	3.02798	4.57633	0.947226	-4.98132	-3.24073	5.92633	-3.04227	4.2417
0.3	3.25912	-3.92643	1.52705	4.12508	-1.2275	-6.58839	3.50761	-1.37858	0.670944	9.29583	0.818843	-5.51558	2.19113	-1.68423	-7.93506	-0.05582	-2.34184	-2.38457	-0.91661
0.4	2.00795	-0.49449	1.97382	1.20308	-3.91562	-0.89231	1.30624	-5.13466	3.20735	4.65625	-0.62918	1.79165	-0.74981	-0.02731	-11.9709	-3.14827	2.38508	1.21905	4.39744
0.5	-2.03431	-3.05013	0.179796	3.44603	-0.56613	-2.61263	3.67641	0.230696	-5.20966	7.49368	-0.25107	-5.50968	-1.20229	-0.88716	-5.80872	-4.50094	9.28357	-0.00431	2.73928
0.6	2.27811	-1.76522	4.64328	6.07736	-1.71415	-7.48002	2.3771	-0.68594	-8.71255	6.75949	0.083667	1.81433	-2.60599	-1.05652	-4.83948	1.1882	-5.80837	0.754663	6.66061
0.7	3.97757	1.19072	0.363955	5.54839	1.1785	-10.8006	1.39881	2.22272	3.85674	7.83565	0.427625	0.987975	-7.4119	-1.16469	-10.3473	0.746838	2.18023	1.66448	3.71361
0.8	4.69851	-4.84192	-0.6602	5.03417	-1.14633	-0.46667	0.772122	3.48124	-10.2261	7.00128	0.991367	-0.7968	-0.57769	-0.46119	-4.16939	-4.86726	1.47477	0.770549	-0.2592
0.9	0.249554	0.333798	1.49854	2.43265	-2.34541	0.454154	2.53495	1.82361	-3.64157	-0.74684	-0.29695	6.07872	0.884094	-0.93163	-0.282938	-1.06499	10.0005	0.370333	-0.52314
1	3.67775	-0.39057	-0.34626	4.62704	-0.39934	-1.29727	0.663341	-2.69557	-3.95042	2.37463	0.191157	-4.95615	-1.23773	-2.63145	-2.37399	2.01451	5.88365	1.71863	-2.43448
1.1	3.7183	-2.20842	0.763701	2.08017	-0.79335	-0.95907	0.774875	1.47953	-2.83355	-0.76379	-1.10381	-5.06929	0.139768	-1.55029	3.76249	5.87852	-2.24211	1.4802	-9.64227
1.2	3.15055	-2.44336	-2.25526	3.04712	-1.36124	-0.26417	1.56657	-0.7569	-2.94582	1.45788	2.51021	-2.63472	1.82076	-0.96828	-0.257911	-6.39243	4.57447	1.02144	1.08393
1.3	2.45864	3.39917	-1.42375	2.03715	-2.48553	-3.19169	2.33615	0.387027	-1.6935	0.541797	0.43191	0.463273	2.00467	0.205805	-7.48446	-2.61667	5.90291	0.081525	-0.92395
1.4	0.450689	-3.37806	-0.57068	0.126246	-1.22922	1.22901	3.43825	-4.33441	-0.36883	-2.04173	0.045198	1.10784	0.469166	-1.95582	0.267256	-1.52626	-3.09633	1.55421	0.851934
1.5	0.279422	0.384777	-3.97174	1.30598	-1.25467	-7.86086	1.13255	-1.81659	-3.59457	2.39225	1.56189	0.619481	5.69332	-1.32867	-2.21729	2.12267	0.568631	4.29325	-1.1718
1.6	0.788652	-2.65599	-0.84792	2.75308	-0.66862	-0.24293	1.67182	-4.46643	1.64677	2.36615	1.39056	1.28735	-1.70394	-1.61844	2.08358	-1.47907	4.23101	1.59083	-0.05577
1.7	2.01887	-1.82104	0.867644	0.608324	0.059692	-0.64153	0.69721	1.84742	-1.38243	1.36304	-0.09061	0.399941	-1.89331	0.851026	1.57915	1.89339	1.93733	-1.56726	2.266
1.8	3.58519	-2.50373	-0.43714	-1.24964	-1.62377	-6.61471	0.434154	2.18761	-1.39488	-1.79229	1.33993	0.283446	-1.16166	-0.3384	6.58969	5.1349	6.66063	-0.69055	0.627334
1.9	-0.63512	-1.84378	-0.3395	0.170825	-1.27271	-1.84122	-0.65156	0.09753	1.7504	2.02664	-1.13115	-2.26286	5.60309	-0.92156	4.57428	-7.57884	1.9495	0.658286	0.567757
2	-1.67415	-3.34253	2.2316	-2.76294	-0.23103	-0.41354	-5.30993	-0.91917	-1.18942	0.454901	0.252674	-0.23135	0.656235	-0.61465	4.91055	-4.88002	-3.86818	-2.41902	-2.36006
2.1	0.491091	4.93572	0.16087	-4.57945	-2.03716	2.86938	0.467454	-0.30225	-5.46791	-1.38548	-2.1549	1.45172	-1.70826	1.08458	3.77165	-5.78815	-8.22972	-2.21624	-7.63154
2.2	-1.70384	1.62513	-0.44647	1.56159	-4.38058	-2.53961	1.5464	0.237609	2.4091	1.41062	1.03886	5.61717	0.455327	-1.1154	1.11916	-1.38589	-0.78519	-1.23047	-0.58717
2.3	-0.23778	0.61535	-0.60896	0.152481	-1.65557	-3.46607	-0.86735	-4.62825	1.97758	-2.57866	0.821188	-0.51771	-0.76737	-0.98776	7.93733	-2.08607	-1.49142	-0.95146	-3.8949
2.4	-0.12465	0.749478	1.41081	-2.87884	-0.85948	-0.90121	-3.98832	1.32321	4.14978	-0.23349	1.53589	8.26002	2.12836	-1.45716	3.18603	8.52051	-0.92463	-2.53064	-4.04214
2.5	-1.60072	0.640346	-3.31848	-1.8054	-2.1351	-3.54081	0.225724	0.594142	-12.2649	-3.33923	-0.24144	1.54379	1.76679	1.06037	-2.63093	-2.66831	8.98553	-0.83237	-2.28604
2.6	3.07036	0.131703	2.51405	1.43871	-0.38093	2.2222	-2.07763	0.60703	-11.5447	-2.28392	0.138993	1.04498	4.28116	0.171748	8.0208	-0.30412	0.962627	-1.02363	-5.58586
2.7	4.15489	-3.96269	1.94522	-0.02752	0.718583	1.37932	1.01147	-1.7986	-7.9455	-0.48847	1.28546	1.06332	4.19405	0.583051	-0.00310604	-0.38203	-0.327	-1.63128	-4.55897
2.8	-0.74026	0.256276	-7.88733	-3.18087	-0.85686	-6.81828	-1.40282	-1.86016	-6.62215	-0.68217	2.70666	-0.05081	-6.77349	-1.14543	2.51213	5.33372	1.34888	-0.03041	-1.3012
2.9	2.72619	1.77429	-12.0041	3.82587	-1.4056	1.09695	-1.13584	0.753406	-5.6535	-2.5144	1.58762	2.38467	-2.63982	0.857274	-2.84319	2.7091	3.27337	1.55621	1.97213
3	0.052888	0.231307	-5.27626	0.519807	0.953979	0.567638	-2.77702	-1.13476	-1.1817	-1.36826	-0.37078	-1.00784	0.725641	1.13072	0.490988	-0.24995	8.49183	0.454185	-5.14351
3.1	1.4133	2.93674	-0.27914	1.46119	1.09362	-1.52851	-5.09102	-3.63946	-2.57478	-2.53957	1.97825	-2.23943	-0.79189	0.444157	-1.37286	0.72873	5.38315	-2.24862	0.295674
3.2	2.05937	-1.05155	-5.20171	1.4836	-0.41492	3.03699	-4.47604	-1.46327	5.98945	0.026747	-1.46521	3.28071	-3.74842	1.31623	-4.14131	1.81688	-3.25015	-0.44552	3.87173
3.3	0.257445	0.946263	-2.85721	0.471077	2.13559	-1.00456	-5.25246	0.808777	-1.34285	-4.36819	-1.50533	-0.95334	3.21277	1.10312	-1.35259	-1.70507	3.54762	0.583589	0.772903
3.4	1.601	2.773	1.28139	1.85136	1.04046	-5.01655	-2.07115	1.64888	1.55394	-2.00589	0.896259	-2.59832	1.65096	0.158738	-2.21947	0.188849	-5.47773	-0.61609	5.32892
3.5	-1.92004	0.260874	0.335854	2.19803	0.700238	0.812667	-3.27803	1.67699	3.8839	-0.52415	-1.697	2.01084	-1.12258	1.5011	1.99172	2.11304	1.12129	0.022466	-1.10042
3.6	-0.46386	-0.10386	1.2947	-1.46537	0.011428	0.021026	-2.3193	1.20977	3.60188	-3.35555	1.01305	1.91498	4.21701	-0.36776	-3.44234	3.77961	-1.17124	-1.80784	0.273293
3.7	-0.84648	-0.88105	6.16135	-0.70047	0.380105	6.02623	-1.24225	-1.14103	-1.4219	-3.06902	2.62567	2.70433	2.50518	-0.25061	4.41221	-4.79631	-0.58406	-5.37213	1.22625
3.8	0.155135	-0.06223	0.721329	0.418641	-0.85795	8.26037	-5.5401	-0.071	9.572	-0.20684	0.524056	2.20703	-2.01002	2.32878	5.12451	-2.4881	-4.76405	-0.19021	0.116207
3.9	-0.7093	-0.54402	0.60044	2.52006	3.76655	1.56993	-3.59856	-0.02706	7.88378	-1.96263	-0.30481	-2.99861	-1.1481	0.934429	0.195802	-0.30488	-1.53737	-0.60873	0.243767
4	-0.01339	-1.3402	0.671158	0.334562	-0.74374	1.03292	-3.53881	1.72637	3.41721	1.14575	-1.73185	-3.75257	0.956054	2.12409	2.02943	3.36236	-5.44	0.475199	-1.62506
4.1	0.241964	-1.79167	-1.70373	4.45871	-2.96963	-5.87516	-2.96381	0.502567	0.407222	0.380913	1.1011	3.44484	2.47614	0.998761	-0.834262	-0.7405	1.78509	1.9088	0.628588
4.2	-0.82996	-1.92255	1.23815	2.56347	0.467731	-2.11019	1.66902	-3.58226	0.428083	-3.20842	0.179971	1.55501	0.020089	1.29094	1.03865	-7.56351	-1.9221	0.317355	8.54657
4.3	-4.02632	0.622469	-1.01698	1.63529	1.99199	2.29413	-3.66265	-0.68292	4.62229	-1.82097	-0.01347	6.54221	-8.3009	0.433786	-1.89749	-0.07362	0.367317	-3.35871	4.22799
4.4	1.55071	0.29719	-5.29871	-0.0813	1.44016	-2.63125	2.93683	3.09934	-4.3221	-4.99509	0.715961	1.78679	-2.30935	1.69808	-3.42624	0.875101	-1.66396	-1.30356	0.397197
4.5	-2.79819	-1.64	-1.11099	-2.7739	2.91396	-1.57737	-1.13461	-2.0994	5.47249	-5.40213	-0.91752	1.26223	0.705984	0.709376	5.89064	-1.89884	0.264855	2.64452	0.174185
4.6	-10.5748	-0.63771	0.423572	-2.08437	1.27483	1.24255	-4.35045	0.571668	9.37452	-2.52847	-0.55878	2.00638	-4.47005	1.77343	2.58287	-3.26738	-1.8706	1.36469	0.207222
4.7	-4.08695	0.688586	-2.33657	2.25392	2.28248	-2.10003	0.398017	-2.65447	4.7871	-2.72535	-1.26552	-6.01953	-2.59924	0.292616	-3.24039	0.751176	3.25678	2.1729	-0.32929
4.8	-0.24106	-1.1239	0.346935	-1.39549	3.269	-1.06046	-3.50544	2.09579	-2.12511	-1.74204	-1.8586	4.30749	0.902503	1.95769	-4.22271	-2.02685	2.51557	-3.21198	1.13019
4.9	-0.46979	1.95737	-1.48492	0.448449	1.95116	2.62964	-0.65475	0.626795	1.76308	-3.12707	-0.6905	-1.79371	-3.19721	1.95843	2.26659	2.00231	-0.73884	-2.99952	6.07516
5	2.75273	0.74477	3.81239	2.47977	2.08822	-0.27466	-0.30387	3.50443	0.645465	-3.45375	-2.33774	-1.62363	-0.53092	1.64381	1.40517	4.06582	0.895723	-0.07247	2.66745
5.1	1.78719	-1.69942	4.92651	1.50946	2.4335	1.0237	5.61347	2.93769	5.72776	-2.7814	-0.92605	-1.45905	1.37524	1.18348	6.48744	2.28244	5.76902	-0.18713	3.45077
5.2	4.38723	10.9238	8.72576	4.88264	1.88664	4.65151	5.35159	9.63295	13.7718	-2.02013	2.79707	10.0189	7.90251	0.89694	13.1768	22.1645	26.0499	7.97879	9.15187
5.3	13.221	18.3996	31.5833	17.4044	16.9993	12.942	17.6232	26.3913	44.9428	5.83938	4.49507	12.4401	4.80828	1.37424	13.8305	43.2054	68.4169	9.27069	20.0748
5.4	25.7824	28.5803	43.5898	40.8112	23.8986	27.0478	34.74	38.2454	75.6415	4.26591	13.1215	24.0629	8.6362	1.39113	24.0758	50.175	96.5914	16.6352	33.6347
5.5	32.6985	38.3113	51.5801	50.4792	35.9111	33.9507	51.3598	49.5494	95.9788	6.69572	20.9648	24.6337	11.3343	3.37481	29.3223	62.6082	106.247	19.0655	44.3939
5.6	39.2985	44.8172	60.1378	59.4621	40.3802	41.3478	66.8094	62.483	114.031	13.4586	33.8401	34.5806	8.63119	3.29884	31.2108	71.473	115.994	22.7731	53.5842
5.7	45.7553	45.7419	62.2319	65.2673	44.1236	45.9265	72.7865	62.0728	103.438	18.598	41.7375	39.2954	13.0555	4.74597	39.273	80.2148	123.194	26.7685	66.7866
5.8	53.4232	54.8462	67.6514	67.4066	45.4195	48.4602	79.2283	72.5944	116.612	23.1209	44.8448	41.7032	15.6422	5.51234	39.7621	86.9152	134.702	27.4154	66.6788
5.9	59.7886	55.9323	72.1296	70.4043	51.0425	54.7284	79.8301	77.7844	114.471	25.3539	48.0642	44.8912	13.9077	5.99083	43.3454	92.8922	140.728	29.2535	67.0095
6	68.0214	56.9198	76.1681	75.5922	51.3145	53.2603	85.1127	82.3324	114.892	32.2879	53.7233	52.8491	17.6186	5.24435	44.6238	96.8908	138.499	35.3817	64.7955
6.1	68.3323	56.7351	77.6345	76.334	51.8912	60.806	89.1714	87.2174	125.449	35.991	58.1303	58.4001	25.0499	7.64122	34.6144	101.07	137.359	34.7139	75.8033
6.2	68.3726	58.1184	79.588	80.394	56.5295	57.5554	89.7742	96.8482	126.281	35.733	55.4295	57.1674	30.5729	6.79814	35.0399	106.02	141.236	39.714	86.9323
6.3	71.9496	55.2001	76.4252	81.1381	55.7258	59.6279	93.582	96.6152	118.508	39.0625	61.8432	59.3907	29.7443	8.69409	41.7401	99.7838	145.901	41.1314	93.7998
6.4	78.5834	62.0505	79.8144	80.4959	60.5528	61.7582	96.7085	102.295	127.516	46.1277	60.1991	61.074	27.3704	8.66953	42.1204	108.98	149.8	44.2756	98.4849
6.5	79.1147	59.7881	80.648	78.1348	57.896	57.3097	98.2342	102.811	119.512	48.0134	62.5027	63.5923	32.9436	10.6838	41.0806	109.026	148.883	41.8776	101.717
6.6	76.7231	60.4109	82.8861	78.1039	57.6718	60.8503	94.147	105.115	132.372	49.2536	64.2348	65.7548	30.4743	10.8581	49.8114	114.78	150.301	48.0797	90.0705
6.7	83.4803	63.7045	82.4172	81.9493	59.383	62.6154	90.1435	108.958	132.46	55.1095	63.7056	67.5203	31.6364	11.4863	45.044	120.827	145.692	52.2204	94.8336
6.8	81.7711	61.926	79.4753	80.3386	56.5861	51.0113	90.862	107.839	135.954	56.0086	63.9442	68.0032	31.3994	12.6973	45.8007	118.112	148.301	54.7441	95.8972
6.9	79.3306	61.4818	84.168	83.6109	55.4922	61.3863	92.676	112.429	132.783	61.6522	63.7742	63.8445	33.1109	11.6422	47.098	117.63	142.725	54.8118	110.087
7	78.6376	64.2109	85.1379	82.0004	57.5859	57.493	89.4327	119.506	124.48	61.0592	63.5224	71.1646	27.9322	10.1175	43.8313	124.882	149.075	54.4684	109.662
7.1	79.3512	64.2746	81.3399	81.9365	62.8422	60.1926	92.0435	118.645	123.687	61.744	62.5095	77.2297	32.9195	10.2525	44.6947	116.488	143.593	58.2807	103.083
7.2	81.8424	68.4457	85.4032	85.1883	61.1993	57.8679	95.3548	117.198	139.267	62.7944	62.8961	67.759	35.8303	12.5931	42.5213	117.788	148.958	53.3463	104.577
7.3	81.0292	63.2407	88.6058	85.6734	61.3399	63.6567	98.4081	118.951	126.426	69.1186	68.0381	74.6611	38.8347	14.5047	42.2586	124.55	149.154	54.7189	108.339
7.4	82.439	66.1201	88.3711	82.5955	62.768	68.6658	90.6811	121.078	131.56	65.5502	68.5697	72.2151	35.8517	12.9796	41.9735	116.94	153.42	57.2484	106.285
7.5	80.6369	68.0004	85.067	83.5123	61.3189	65.364	96.2269	124.473	136	72.6834	67.3711	71.5679	35.637	15.259	42.6652	121.827	149.999	56.0106	109.197
7.6	83.3634	67.5148	81.5405	81.9713	63.6186	72.1629	98.5375	123.072	130.529	69.6435	69.0004	74.0278	39.7702	13.5012	47.9257	119.674	144.697	57.4151	120.222
7.7	79.6448	63.8407	84.605	84.1226	60.1137	64.1554	92.7625	129.679	135.115	75.7325	66.4616	77.3464	41.7343	14.5942	35.6353	124.894	144.719	63.3818	112.041
7.8	82.9538	65.245	83.3279	80.2228	64.6697	65.9146	92.8034	121.973	118.809	79.2793	69.2081	77.6811	35.4315	13.6443	36.7669	128.128	148.895	61.4416	111.18
7.9	85.8218	63.4013	85.0485	80.8461	65.43	58.6143	96.0047	127.188	125.701	78.7485	67.015	77.1063	41.6105	13.7491	43.6368	125.61	145.633	60.0194	105.121
8	84.7763	68.052	83.1704	82.4615	63.7234	66.4467	92.285	126.988	123.502	80.1384	66.5266	78.5683	42.3891	15.266	34.7913	125.132	149.408	58.5617	106.12
8.1	84.9774	63.9972	88.4531	86.0128	65.0524	68.3357	95.2355	128.563	120.734	80.7713	67.4676	83.0448	36.8329	16.5068	45.1451	124.237	149.122	59.5836	106.011
8.2	87.3569	64.9572	81.5682	79.2982	62.8778	69.5065	92.053	127.607	137.167	78.5519	68.748	76.2826	43.6605	12.5821	43.2792	129.281	148.525	56.4884	110.916
8.3	82.7275	63.5563	84.7125	78.9764	65.1177	69.0985	98.1396	128.996	138.049	82.4871	68.5633	82.2986	43.9226	13.8514	46.0057	129.936	145.767	57.8587	112.747
8.4	81.1084	66.6611	83.4047	83.5597	64.9543	66.6829	92.8414	128.48	131.457	83.6372	68.5186	74.6888	43.5555	15.3145	43.4061	129.371	150.567	61.3166	104.176
8.5	83.5286	63.9053	83.5476	81.8382	64.0295	65.5889	94.9314	127.51	139.945	82.8552	67.4089	81.9067	45.5421	15.5744	41.2742	131.403	149.547	62.0649	108.485
8.6	82.6949	60.1679	82.0079	82.5113	65.6331	66.1398	96.3133	126.124	136.449	81.577	70.2397	81.8392	44.0057	16.6349	42.5889	123.688	149.626	60.9507	115.129
8.7	83.5962	65.683	79.0393	82.3356	66.477	63.6232	94.3839	129.28	140.016	87.1316	69.484	82.9552	44.9605	15.9361	39.8235	125.233	143.5	58.5995	112.167
8.8	82.0366	64.4649	80.5658	84.5285	65.0018	62.4627	91.048	127.877	135.432	86.6052	70.3337	84.447	45.4798	17.1189	54.3504	128.184	150.793	62.3008	106.237
8.9	84.3257	62.9693	83.7629	81.6519	63.0849	63.3912	95.5016	124.626	141.829	86.2495	65.5161	84.5805	50.9473	15.2982	46.7692	129.205	146.661	60.2133	114.993
9	85.3998	62.3877	79.7807	80.3374	64.8524	57.8861	97.4889	130.87	136.143	89.7879	68.7458	81.6032	40.5122	16.1952	44.8846	125.713	150.774	60.2961	111.271
9.1	87.1689	65.4619	84.1603	86.1558	63.6392	60.292	96.2243	129.812	146.107	88.3898	69.9306	78.2096	45.0996	18.2243	45.9337	122.148	141.767	61.977	113.893
9.2	82.9102	59.3693	78.9039	81.239	65.0823	54.7922	92.4922	129.469	136.571	89.5531	66.9986	83.3542	49.6545	17.8252	43.784	127.329	145.33	63.1569	117.418
9.3	84.1905	66.6317	80.3137	84.3919	63.8405	59.3881	94.91	131.603	143.49	87.0965	70.8013	80.5795	50.7781	16.2958	48.5203	123.167	148.201	60.8563	120.271
9.4	81.4402	60.3254	79.6681	85.7713	65.0912	62.4619	92.3173	132.976	144.2	88.0716	70.4992	82.9985	48.9578	16.7851	42.8734	124.394	145.447	61.5521	116.55
9.5	84.5172	61.6807	79.5878	81.4505	61.2761	60.2784	92.858	134.237	138.492	91.4032	70.5907	76.0038	46.3901	16.2638	41.1059	132.286	145.131	62.7538	119.646
9.6	82.204	60.541	76.8457	80.9468	62.0778	58.018	93.0122	130.569	137.896	91.4174	66.2454	81.8988	43.4464	17.3617	42.5294	125.433	144.356	63.801	120.534
9.7	84.688	58.7443	79.6921	84.7351	61.4174	59.7763	93.3575	130.725	145.263	91.8732	69.0995	82.1242	49.6116	17.9825	39.103	127.082	141.789	58.4652	112.437
9.8	84.6675	59.1577	81.7037	81.547	60.5481	56.3003	92.4194	130.387	137.642	93.6328	66.8358	85.2617	49.2482	17.2064	45.8681	124.93	142.946	59.2232	124.392
9.9	76.8911	60.4546	82.4767	84.5106	62.5586	60.5315	96.7797	122.368	140.61	94.0285	65.675	85.4709	43.8426	17.2458	29.6849	124.208	141.617	59.3889	121.717
10	80.9666	63.0749	81.6267	78.9311	62.0013	67.5604	90.5611	132.041	141.442	93.1566	68.9591	82.9541	47.2018	18.3069	39.7849	126.235	144.951	58.7596	119.043
10.1	80.6473	60.1067	79.634	81.9354	60.784	61.3648	88.0548	130.698	141.154	91.6154	65.0767	84.4113	46.1507	18.1438	44.2953	125.481	139.299	59.7417	120.315
10.2	79.8175	60.0263	80.4943	84.7621	64.2239	59.5894	92.249	124.667	137.774	96.6521	70.5535	85.0235	47.8157	18.5056	45.2978	123.617	146.903	62.3019	118.349
10.3	80.9949	60.6015	80.9077	79.9616	61.4811	64.5397	95.2545	133.146	137.679	94.1599	64.8563	89.7433	44.4839	17.1787	44.4386	132.226	139.041	58.0899	116.823
10.4	76.0758	62.7752	79.8698	79.1569	57.1211	60.6153	97.5958	130.814	134.877	91.4361	63.8697	83.0063	48.1476	18.407	36.6064	124.316	135.477	62.2575	115.302
10.5	78.2436	62.2135	79.2394	77.248	57.4026	58.8199	91.5478	127.881	140.6	93.3066	67.1387	86.6124	54.3432	17.3107	36.2566	132.881	142.829	61.4241	109.882
10.6	78.951	57.8852	79.7105	79.6844	61.4658	63.7387	97.8917	129.945	130.92	98.4177	67.1956	86.7417	49.9632	18.4667	39.354	125.851	146.17	62.0508	109.235
10.7	79.0761	59.5204	76.3432	79.9653	63.0931	53.7733	91.794	130.021	145.863	98.9049	67.5815	83.0364	51.2881	19.3565	41.0965	124.123	137.065	62.242	111.709
10.8	79.9595	62.4549	82.0708	81.0061	63.9715	54.4982	94.208	124.249	145.382	96.1197	70.2329	81.2425	48.6677	18.6884	43.9444	120.927	143.624	64.5262	115.449
10.9	77.3615	63.9931	76.8272	77.5085	59.6453	55.0677	87.9173	118.774	149.851	97.4428	68.2201	77.2633	54.7886	16.729	43.8249	124.283	144.589	61.6875	110.885
11	75.353	63.9784	77.6557	78.5377	61.622	55.031	89.8579	131.613	141.68	97.1334	68.3967	81.5664	58.3549	18.3464	29.1756	124.703	141.37	59.3654	117.013
11.1	77.7711	56.4762	79.3793	78.3291	61.0782	59.6019	86.5093	131.698	128.347	101.085	64.4486	84.826	53.7633	18.0352	31.1243	118.424	141.769	64.6516	111.536
11.2	77.8997	57.892	80.9436	77.9358	63.0475	55.1755	92.549	129.141	133.765	101.483	67.9405	80.2208	49.9702	17.4458	39.6973	119.533	140.338	62.7296	108.046
11.3	76.5597	59.4134	77.375	75.4262	61.4356	52.8404	90.6056	131.792	135.711	100.733	66.4403	82.2431	46.8741	16.6009	38.2037	118.879	144.187	61.1182	121.86
11.4	75.0016	57.391	79.0057	80.5096	59.709	54.8979	91.0125	127.918	142.958	99.9292	67.4313	76.2628	42.7161	19.3848	35.4306	126.246	142.182	63.5025	116.036
11.5	76.743	54.0886	82.0326	78.9068	59.7842	59.0293	96.0081	122.014	150.548	103.563	66.0864	83.7687	59.4455	20.0942	41.628	124.897	143.332	61.1202	117.45
11.6	70.6332	57.6877	77.9921	73.9262	62.0128	52.7244	93.9297	129.378	140.359	103.441	67.6434	79.0113	52.3618	20.4158	33.1701	125.37	142.553	62.2765	113.893
11.7	74.8651	57.4319	81.6238	74.0622	58.0208	60.3087	88.0087	128.216	143.029	101.189	65.931	81.4199	49.5299	19.9031	36.1336	126.575	137.11	59.5114	115.7
11.8	72.5466	58.9758	78.8233	75.3775	60.3166	57.2845	88.0877	128.295	124.99	97.7536	66.9865	80.3973	50.4553	18.4024	37.4477	120.379	135.876	57.8713	128.058
11.9	76.8007	58.5963	76.4284	73.6091	58.3498	57.8733	86.8335	125.172	128.633	100.522	65.9641	72.7194	55.9602	18.4689	36.4045	128.517	134.826	56.2841	114.605
12	71.8147	58.9359	77.1222	75.3874	61.7309	55.7568	94.027	126.427	138.308	101.55	67.6669	79.2023	54.0511	19.3695	33.7398	125.344	137.155	60.2991	108.346
12.1	71.4367	55.8577	80.3278	73.934	59.9886	62.6674	90.2297	127.081	127.42	104.488	65.5785	79.2578	48.1708	19.1924	36.3089	116.167	138.351	58.5863	114.819
12.2	74.4639	54.5864	77.8107	76.7419	60.1607	60.46	89.8624	125.022	127.018	103.335	65.4898	77.6189	51.317	19.4504	31.708	129.227	132.698	57.6503	102.555
12.3	75.6064	55.6155	75.1503	69.7527	57.8993	53.5252	89.4393	127.794	128.133	99.4855	67.4814	78.9741	49.7739	19.0549	34.6008	125.258	133.863	60.5022	101.708
12.4	71.7496	58.0786	77.4543	72.1481	60.4891	56.2876	88.5341	122.388	127.192	103.041	69.2661	84.744	55.1395	20.2549	35.4063	122.442	130.683	57.1666	108.151
12.5	74.1772	54.4374	73.4991	73.5394	60.8353	55.2089	88.0425	123.205	133.122	102.473	64.999	85.6504	52.5369	19.7148	30.9768	120.227	136.972	55.512	107.194
12.6	69.8358	53.1358	73.8133	75.9094	60.4921	54.4426	88.2747	128.598	127.592	103.269	64.0292	76.0019	52.1617	20.414	41.5003	119.62	127.647	55.055	105.344
12.7	69.9261	59.9707	76.8375	75.8129	56.0687	55.6314	91.0563	129.062	132.77	102.003	64.668	75.9145	46.3779	19.755	33.4331	121.872	133.263	54.3245	110.863
12.8	68.3349	56.2368	74.2961	75.6058	57.6146	56.0241	83.046	122.972	127.156	105.329	65.8547	80.0903	51.8723	20.1776	38.1011	113.427	138.358	52.5785	102.501
12.9	70.7601	57.407	79.0002	73.1168	55.9794	58.6077	85.873	130.663	128.17	107.171	66.4002	84.1615	45.0156	20.08	28.6477	117.372	132.519	53.2673	106.799
13	70.2896	61.0575	72.8028	74.8246	55.4029	60.1467	83.439	124.574	125.755	102.482	67.5376	82.5441	53.0977	20.899	38.0064	119.563	139.048	52.1179	110.689
13.1	70.9668	52.3812	74.3779	67.2145	56.6685	57.5246	83.8786	127.551	121.476	103.553	64.7455	83.5881	48.0202	20.4632	36.3494	119.522	129.583	51.256	112.524
13.2	73.3373	53.3412	71.8506	67.24	56.3574	62.595	86.3309	129.189	124.957	103.102	68.9261	80.7434	52.8544	21.318	43.5851	122.036	128.834	53.758	111.629
13.3	68.6501	50.9313	70.2142	70.5642	56.6033	63.3458	82.9783	126.958	113.094	105.697	69.3682	76.779	56.6754	19.9427	43.8619	116.406	131.757	52.3587	109.275
13.4	71.0051	49.1448	71.8941	70.7877	56.3176	62.2471	87.032	127.95	126.827	102.132	67.9127	78.8434	54.52	18.325	54.7034	118.492	128.423	53.701	103.794
13.5	72.2946	56.1989	72.2493	71.3553	55.7518	59.4263	80.6981	126.35	115.408	104.659	67.444	76.5824	55.5333	19.1904	45.8182	116.344	136.192	54.4123	116.356
13.6	70.9162	52.9336	74.5518	72.3266	57.458	56.4543	86.2354	125.554	118.743	103.899	64.6036	78.0724	48.2356	19.7496	46.2616	112.879	132.561	51.4411	112.871
13.7	70.4305	54.3069	74.6712	68.659	55.1526	55.29	87.3897	122.142	132.367	101.69	64.4347	77.6171	49.3002	18.4682	60.4797	113.555	132.176	52.6355	108.679
13.8	72.5633	48.6923	70.1449	74.1726	57.0745	53.4291	80.0521	122.592	131.968	102.512	66.1497	78.6577	55.8821	19.9014	55.057	113.848	137.292	51.8302	106.978
13.9	66.1397	56.0855	73.3905	72.1427	56.8309	52.2703	82.007	122.067	127.461	103.947	66.1337	72.7885	56.6918	18.6397	47.7695	107.21	133.016	55.1499	107.626
14	69.0544	50.54	71.2275	72.3677	58.3451	51.0979	82.7933	126.183	118.41	104.372	66.615	80.7219	54.1883	19.9543	48.3454	110.546	132.382	53.6464	112.593
14.1	70.8623	54.5815	70.2066	74.8381	54.6442	52.6641	81.4157	124.005	118.234	101.4	65.6589	76.3839	55.4008	19.4712	46.7068	114.043	133.123	53.5734	103.767
14.2	69.6706	50.1114	71.6589	73.6194	55.5846	58.919	82.8684	123.368	121.173	103.016	63.9884	80.4192	52.4586	21.224	48.2903	112.583	127.103	51.4696	107.496
14.3	71.8872	53.4703	69.2184	74.9747	56.9359	54.1164	80.1984	119.471	123.5	105.222	64.1402	72.9406	53.4489	19.06	42.705	115.873	128.668	49.7068	113.42
14.4	70.0093	52.7983	70.9495	72.2215	56.7069	53.5843	82.5821	121.198	125.32	105.265	62.6604	74.9559	52.8203	19.7668	52.1307	108.924	126.869	50.529	104.37
14.5	69.674	49.5577	70.3972	70.8828	54.0152	54.2175	79.4765	119.176	134.467	104.856	61.9042	77.3733	54.2936	18.959	52.3821	114.918	125.113	49.2714	104.407
14.6	72.8703	52.5568	70.8805	69.7465	52.8892	58.6504	81.658	114.482	126.748	101.614	63.0085	75.9608	57.8959	18.9384	45.7275	116.272	122.505	52.3512	112.366
14.7	69.8577	55.2511	68.5182	73.6672	54.4167	59.1309	79.6002	118.965	134.873	103.348	65.2997	72.9656	57.3979	18.3381	44.1541	110.785	126.828	50.0951	103.403
14.8	69.4583	56.5801	70.3771	68.3819	55.8469	48.3452	80.4578	118.601	122.837	105.345	66.8444	73.5909	56.5466	19.6487	38.2093	117.624	130.116	52.5309	95.88
14.9	66.8712	49.2711	70.3416	73.0285	57.5205	55.6426	76.4869	119.139	123.993	102.397	64.1409	73.088	54.7207	20.4385	36.06	116.185	128.566	51.3268	102.781
15	69.705	52.6166	68.1996	71.2293	54.8525	47.4221	82.5757	120.104	117.938	103.852	63.7345	76.5912	60.3309	17.884	33.7179	106.076	129.192	49.3927	97.6578
15.1	69.3854	50.2892	67.7365	72.248	56.1525	53.1354	78.0066	116.964	130.036	102.518	61.6488	73.8946	54.5935	20.2569	41.9948	112.299	124.688	52.9153	101.786
15.2	69.8232	48.8352	66.7042	67.2111	54.6558	52.9234	77.3065	115.326	123.684	100.711	62.2076	76.8204	56.9693	20.1529	32.2608	114.622	127.633	51.9611	108.579
15.3	69.0325	48.4795	66.2118	66.3491	56.581	51.2165	78.8794	116.517	126.079	106.218	65.4666	71.7252	56.1146	18.1899	36.9142	109.522	121.179	52.5116	103.113
15.4	67.1104	53.1443	63.7823	67.2414	53.3676	56.5881	77.3732	115.294	133.121	103.789	63.4353	71.9601	53.4652	17.8853	46.1758	112.292	119.922	46.4653	109.474
15.5	68.1605	48.4057	63.5329	64.3212	54.8249	52.4957	78.8769	120.277	132.14	105.817	62.7023	76.7544	58.6561	19.9321	40.6845	111.979	118.764	48.5743	101.194
15.6	65.5379	49.7947	66.5578	66.5471	55.6166	54.6252	82.9187	119.386	125.643	101.657	63.9506	70.139	55.696	18.7104	39.9743	115.624	114.309	52.4596	104.738
15.7	66.8369	44.6687	67.7035	64.4635	53.5572	52.0891	80.4929	117.215	112.202	103.446	61.1229	79.7359	52.0047	17.6971	46.7864	107.954	123	52.3863	105.913
15.8	65.4576	53.0846	69.4446	67.3977	52.2999	47.5889	82.2896	117.131	111.685	101.928	61.2396	75.5847	52.123	19.0299	38.2659	104.599	120.262	51.8067	103.651
15.9	67.1534	45.1522	67.2375	66.1734	52.0471	51.4177	80.6315	114	104.743	103.11	62.8878	71.588	54.3847	19.2251	34.297	106.553	118.081	51.3783	110.309
16	67.5797	52.0021	65.878	67.0693	51.6617	37.6766	80.0275	113.058	107.853	104.027	60.4837	73.3406	57.3379	18.5503	28.0756	108.384	120.242	52.4736	111.769
16.1	66.7654	52.091	67.1353	66.167	52.6238	41.8879	75.7	114.761	109.332	105.143	61.2259	69.1252	58.4385	19.3674	37.0123	101.049	118.337	47.1588	112.166
16.2	61.6546	50.8673	66.7437	67.4693	52.2743	54.9026	78.2141	114.168	120.373	105.385	59.6455	73.0446	57.1446	20.9273	37.7788	108.404	116.474	45.8972	107.268
16.3	65.9485	49.0255	66.7689	69.7994	53.2788	48.1658	78.7324	110.554	108.795	108.097	62.8171	76.5747	53.2034	19.4452	26.6746	105.543	115.31	50.6117	109.522
16.4	68.775	49.6295	66.2339	65.7864	52.9591	42.6693	79.2897	112.057	117.243	102.251	61.3865	75.0311	53.1313	19.4684	38.7845	107.735	114.959	47.8388	110.811
16.5	63.7338	48.9888	65.3205	65.9647	49.5384	40.4102	76.8964	112.679	130.286	103.521	59.8972	70.2966	54.2613	20.1875	36.5352	114.87	116.982	49.0667	110.263
16.6	64.6901	48.8559	67.0528	65.1724	49.4413	35.9011	78.5415	109.622	125.012	99.8346	60.7641	72.8857	48.9922	18.1502	37.5875	118.27	116.493	46.8152	112.634
16.7	65.0574	50.2841	63.4477	67.7044	52.232	41.0287	79.6868	107.136	121.691	103.735	60.2954	73.3492	53.428	18.4888	41.4059	110.031	123.913	47.8506	107.906
16.8	62.7564	47.3932	65.2542	61.3648	52.8904	47.5993	77.4481	110.743	115.085	107.494	61.3945	70.729	57.1169	18.0753	43.5158	107.456	115.077	46.7878	105.267
16.9	61.7894	46.4261	69.2917	66.2306	52.8775	46.6946	77.8652	107.976	122.263	104.047	60.5157	70.9646	54.8873	20.072	37.2874	106.054	111.985	43.3157	106.315
17	62.0421	45.5341	63.6881	66.863	52.1907	47.4563	75.0222	111.334	122.025	104.961	61.2244	64.8261	52.8195	20.1749	34.5588	105.053	115.54	47.0767	89.9939
17.1	62.8366	49.1291	62.1217	62.1474	50.7596	42.239	78.0149	110.221	117.269	104.542	60.5469	74.7741	55.3687	19.2131	30.8877	109.622	121.334	45.7491	104.932
17.2	60.1716	50.4904	64.6903	64.1272	51.0057	37.9049	78.3813	105.614	112.163	105.801	63.4467	69.1585	52.1712	19.8915	43.0054	108.755	114.092	42.5415	96.1552
17.3	54.2392	49.0133	62.7257	62.3282	50.4695	44.5269	78.377	110.536	116.847	102.92	60.6016	70.0048	47.9241	19.5811	30.7004	109.808	119.451	46.5826	98.2433
17.4	60.6991	47.4085	61.572	61.6324	50.7675	48.1552	75.1814	110.158	124.633	106.911	61.295	71.3608	52.8078	19.307	35.0579	101.002	109.564	44.5034	99.3813
17.5	57.0639	48.785	63.8502	59.0704	48.4277	44.4116	77.6896	108.57	120.571	104.431	59.5838	70.5798	54.3831	19.9913	28.7814	101.52	115.967	44.8264	103.271
17.6	60.4956	47.6412	64.4495	60.6257	48.8357	48.2051	73.6166	108.146	116.067	102.156	60.1133	66.7919	52.711	19.5115	35.2308	99.5712	113.441	45.9643	93.4879
17.7	59.8033	48.3284	60.6108	60.8909	47.9103	45.685	80.0951	102.74	119.467	103.026	60.1938	67.0897	54.2302	20.944	37.4087	99.451	111.031	45.555	100.16
17.8	61.6514	46.8003	61.3463	60.4476	48.3138	42.4923	75.6343	102.909	116.89	105.134	59.0184	68.2678	52.2516	19.4208	39.0484	104.665	113.707	48.4419	94.8928
17.9	57.945	44.0684	63.4706	63.7117	51.3887	47.2848	78.2624	104.784	122.192	105.19	59.3787	73.4798	50.6574	19.8896	43.5178	102.227	103.995	44.9884	104.913
18	58.1186	47.3641	60.3071	60.4299	50.004	44.9216	70.2422	103.763	113.995	106.777	57.8963	67.0009	55.1682	19.8039	38.589	102.441	110.023	43.8513	99.1803
18.1	56.7783	45.5789	62.4897	61.1613	51.2076	51.7381	72.4265	105.691	124.715	103.604	56.8686	69.7565	53.472	19.1471	24.6835	106.971	112.857	43.2978	92.8356
18.2	57.1476	46.8997	56.5075	61.9538	48.9491	44.2333	73.5458	105.71	120.333	104.792	61.0602	67.3798	49.5042	20.9678	34.9272	101.409	114.44	44.1571	99.0065
18.3	58.9327	44.9915	57.8428	61.3852	47.9316	44.2121	75.2113	103.173	114.543	97.4516	60.2972	70.5664	54.4653	20.9602	32.1227	99.3237	114.409	45.2814	94.4805
18.4	58.4902	42.293	63.5991	61.3578	48.7378	42.4901	73.4986	100.205	109.252	104.483	58.7346	65.8823	51.6332	21.6027	34.9138	91.312	112.997	39.3798	97.328
18.5	61.1428	43.602	61.5167	62.2872	45.1253	38.937	72.813	102.615	114.788	101.506	55.5614	66.6982	54.9866	19.9655	25.7025	97.3863	105.362	44.1656	100.649
18.6	58.7018	45.8869	61.6603	61.081	50.463	37.6561	70.8916	108.215	111.429	101.978	57.4502	69.9764	52.1803	19.6844	15.6651	97.1419	114.339	44.7543	90.8215
18.7	57.2273	42.8249	60.0157	58.7481	47.363	38.0228	70.9397	104.498	119.96	101.902	54.8145	67.0005	52.6608	19.1215	14.5226	98.2375	116.437	42.3336	98.1749
18.8	54.0015	44.4062	58.1028	59.6558	47.3776	45.8138	74.1692	103.109	121.883	103.961	56.9666	66.9041	47.4641	19.3505	11.8877	102.595	109.466	39.5233	93.8569
18.9	53.9174	42.9598	58.2758	60.6916	45.369	43.0354	67.3598	102.642	120.456	101.6	55.4987	65.4661	51.4324	18.3061	20.6431	103.692	106.489	42.6307	90.4862
19	56.4712	42.3218	58.848	59.7175	45.4933	43.7982	66.4133	101.452	117.642	102.516	57.1211	62.392	54.5662	19.8983	16.7713	97.0727	103.637	40.8519	96.9728
19.1	54.9841	41.9697	60.4579	60.2379	47.4987	45.2043	71.0502	102.449	108.44	102.629	55.7342	65.8067	56.7759	21.9811	19.2097	96.0451	107.342	43.5343	94.5573
19.2	53.6967	42.9632	63.8668	61.3933	49.1276	40.6639	71.1816	105.222	103.947	102.171	56.9594	66.4986	53.9444	20.8354	21.0361	98.5565	106.562	39.9146	93.7928
19.3	51.7552	43.6862	64.4929	59.9101	44.6278	40.2969	69.6823	100.116	107.341	103.169	55.7692	62.1233	47.1918	19.876	22.5134	97.273	104.809	42.6859	92.5884
19.4	52.2017	44.4918	58.8745	56.2824	47.9723	44.8297	65.5368	98.9799	106.992	101.788	55.3853	56.9115	46.9481	19.5045	16.0557	95.7691	103.732	38.9422	98.9038
19.5	49.5288	42.8376	58.9799	55.5658	47.1841	40.5795	69.0172	99.2523	103.627	101.234	54.5216	57.1826	54.2333	17.3556	17.4556	99.6694	98.4664	41.516	93.848
19.6	48.8918	41.5993	59.7677	59.1506	47.3602	39.0903	67.9713	100.152	113.644	103.226	57.7128	57.4407	47.2952	20.4476	23.9278	94.9005	100.854	40.9166	91.4773
19.7	47.34	45.2719	55.3881	58.2018	48.9757	41.1166	63.3251	99.821	116.473	103.888	55.9927	65.1766	49.2771	21.0777	23.8768	91.6755	101.313	36.3493	90.4221
19.8	50.5258	42.7202	60.5952	59.7788	45.3829	39.6823	68.5112	98.7361	108.843	102.456	57.2471	64.1296	48.5157	18.0208	23.2499	92.2592	102.27	41.1193	91.4385
19.9	48.5861	41.3717	58.9776	51.9089	47.4288	40.4965	66.9194	94.536	106.654	100.996	58.9763	60.9673	43.5259	22.5531	24.4946	92.3189	100.712	40.543	96.5232
20	43.2504	46.1967	57.5013	58.8951	45.8841	44.3641	65.0908	95.0635	106.312	101.935	52.7851	61.1812	47.0716	18.3568	20.5258	91.0546	106.037	42.2708	98.761
20.1	49.8669	43.2825	58.9498	59.3435	49.3816	40.3391	70.151	93.4125	91.6133	100.946	55.345	64.535	51.4032	18.5358	19.014	90.5902	103.11	37.0842	88.3673
20.2	46.7029	41.2953	59.2807	60.2078	43.7077	43.125	69.0698	95.752	99.8785	100.154	55.7553	58.5372	53.4996	18.1197	18.9357	92.4918	110.49	40.9851	90.6374
20.3	50.0703	40.0225	55.5234	58.1316	45.6964	29.9371	67.582	97.2834	113.671	100.518	56.2956	61.4559	48.2922	17.809	16.325	93.8092	103.009	38.852	92.1786
20.4	46.5648	41.1976	57.7923	57.6118	45.2691	44.3845	62.9897	94.7341	110.531	100.738	57.1396	62.1075	50.4346	18.508	21.3689	94.8471	99.3147	39.5157	92.8537
20.5	48.9582	40.3751	58.1892	51.5584	45.5313	41.7593	64.4476	92.8095	108.66	100.021	57.6495	58.5906	51.8002	15.599	10.9465	95.2295	95.5712	38.838	95.1922
20.6	43.7467	43.0591	57.2401	55.6461	45.1399	41.4419	66.0563	92.3263	99.2867	100.027	55.1227	63.6426	49.0311	17.7661	17.9363	93.6822	97.6756	38.5152	105.224
20.7	46.6132	38.8156	57.008	55.7652	46.4683	43.0181	65.918	91.9787	109.757	102.468	53.8272	58.0998	44.1902	19.497	16.7448	88.4283	89.2428	40.7643	94.0733
20.8	50.2609	39.9589	57.5438	48.3041	46.4836	41.3703	66.8583	90.1595	99.2801	97.9698	53.6997	58.2989	46.2588	18.0264	16.7805	90.3158	97.2801	36.6794	92.3991
20.9	51.6252	39.4306	55.2662	55.6509	43.6953	44.2306	64.4846	91.6342	94.1794	102.038	55.7188	59.6707	49.5253	19.2939	16.5283	90.553	93.9664	37.0888	87.8904
21	48.9574	41.7785	56.476	55.271	44.3106	50.6136	65.5194	96.0112	108.203	103.249	52.7951	60.2591	50.9592	19.173	16.9278	89.1323	96.7146	38.4298	86.431
21.1	47.578	37.1986	56.6156	56.4684	46.5818	46.3631	62.6743	90.9603	114.487	98.6028	56.9395	60.5051	50.3137	18.7078	14.9723	95.3268	99.8644	38.676	83.5005
21.2	43.0921	41.1104	56.6843	56.7429	46.7568	44.9265	68.5805	88.6612	97.8853	100.191	53.3422	60.2051	43.8558	18.3779	13.8867	92.4707	89.3757	35.5865	90.2013
21.3	48.8732	38.2613	53.3115	55.4449	46.1626	42.9643	64.1237	92.1192	104.332	100.16	54.356	55.6744	48.0909	17.4674	15.6134	96.8121	91.7089	40.4115	81.868
21.4	49.0211	40.9468	55.1158	54.8451	43.7517	39.4335	67.6145	92.2263	106.589	97.3215	53.6168	58.2585	45.2129	18.0513	19.5749	92.206	90.114	36.5685	88.1377
21.5	52.4521	39.0611	56.0211	52.1261	43.3748	45.1802	63.8904	88.4296	102.303	101.764	53.6036	55.8912	47.8712	19.062	20.9099	91.3681	96.9389	35.6646	89.2715
21.6	48.8819	41.0039	53.0691	52.7085	43.729	44.7354	62.6475	90.8333	92.7875	102.532	54.3168	53.0016	45.0765	16.9473	25.3749	83.6082	98.2028	37.8737	87.536
21.7	51.5766	45.5606	51.7362	56.3122	46.2172	41.7632	59.8453	88.4382	111.881	98.0841	51.0335	56.4601	47.2392	12.0724	19.8566	88.2316	93.5536	38.899	80.0545
21.8	46.3697	40.8677	55.57	57.8907	42.6048	43.0929	64.9941	88.555	102.919	100.291	53.6481	55.4616	48.0371	18.2587	17.9531	89.6894	88.9727	38.0896	81.3778
21.9	49.1269	39.4886	53.0648	57.0574	41.1243	43.8552	65.0864	90.9703	101.465	99.413	55.0602	59.9115	47.7035	16.4409	18.0795	91.233	92.0264	37.338	83.9582
22	46.8621	38.3928	51.9762	55.8199	44.0595	44.8975	61.6423	89.3116	112.356	101.245	55.6435	53.7711	45.4355	16.578	22.8045	86.7029	88.9679	37.7917	88.8601
22.1	48.8242	38.4886	54.8208	53.8421	43.2214	45.6491	63.1399	87.3763	102.183	101.157	52.8074	59.8339	44.4134	16.9237	23.0335	90.811	85.1991	35.4031	85.1841
22.2	45.944	40.0804	53.9571	54.6977	41.4745	41.3602	61.7239	91.3283	102.966	98.4759	52.8217	56.6907	46.3783	15.0816	18.3148	86.4662	87.9116	40.1398	86.0404
22.3	43.7964	39.6596	58.7446	53.703	42.5227	41.6975	61.7219	84.1085	95.6972	99.6698	51.8081	54.1204	49.4067	14.801	21.7441	92.2308	97.9932	36.0134	89.1011
22.4	46.5958	38.5442	54.8129	49.3177	41.9918	39.0892	62.8168	93.1606	100.29	94.8709	52.971	58.6414	50.8973	19.5807	17.5834	91.2284	90.1906	35.5831	88.8011
22.5	45.2111	38.2478	56.2528	52.8877	42.2141	45.5218	61.3672	86.412	99.418	97.3473	49.2218	59.2992	44.2509	16.1558	17.8624	89.4097	91.0035	37.3266	79.0967
22.6	39.8735	37.7097	51.273	49.9843	41.072	42.7837	63.4537	85.7968	101.812	94.4449	52.3749	59.9682	46.5049	19.3462	16.0555	85.2017	86.7969	36.4619	85.7551
22.7	45.8191	33.2715	49.8348	52.6727	42.7551	44.0649	62.8472	84.7917	91.0413	99.5707	52.8524	54.1293	46.6287	17.3626	17.1152	90.3173	92.7823	37.9318	76.5633
22.8	41.7664	38.3138	51.3842	48.1797	40.9895	40.5702	60.2498	84.2564	100.307	92.2257	51.8059	55.7815	48.2779	17.0453	16.0047	93.7451	81.9912	35.6176	72.1305
22.9	44.1661	38.9828	48.7752	51.9503	41.855	41.0189	59.9901	87.8779	89.2515	95.6682	53.8479	58.833	44.9495	15.2362	21.3067	87.8888	88.7439	31.5833	70.7737
23	40.9427	39.0042	51.031	50.9551	40.6328	39.6832	60.2329	84.5142	87.2295	95.8796	53.3278	52.1921	48.0975	15.6234	18.8663	86.8227	86.5619	35.9504	75.2383
23.1	42.459	41.5346	50.8012	48.992	36.5482	40.6391	57.7366	82.389	91.0587	97.4874	51.904	56.5215	44.0191	17.4423	12.2165	86.9746	86.8091	33.4241	66.8291
23.2	40.6486	40.9586	51.3026	53.7481	40.0135	35.7443	62.0682	81.9884	96.8519	98.0609	49.5745	56.3863	45.2171	13.6915	18.4436	89.2124	84.6837	32.5129	73.3534
23.3	40.2922	38.8902	45.8354	50.086	41.0525	41.0614	58.1631	80.3632	86.8964	96.8303	51.731	55.9764	41.4551	17.9266	16.272	87.2898	82.509	32.1251	79.7392
23.4	40.3191	40.1328	51.8332	48.5197	43.0134	41.8291	56.292	78.7057	86.0285	98.0207	54.506	50.4013	43.9286	17.5561	16.2085	87.4634	79.2503	32.0854	71.587
23.5	39.5225	34.0437	49.2973	51.9596	41.6514	42.4306	61.4602	80.4329	83.2846	96.0155	52.7608	53.3155	44.8546	16.9731	23.2747	84.0357	81.5577	32.4939	74.9622
23.6	39.9858	38.8584	51.326	49.6068	41.799	39.5964	59.945	81.3942	86.9857	94.6237	52.6917	59.642	43.1266	13.915	20.6481	87.4485	82.5201	33.4174	79.4257
23.7	38.0834	40.5122	50.8733	48.9696	39.6415	43.5269	59.3309	80.0434	92.0498	96.0892	51.8044	52.7958	48.1234	16.9437	19.9908	87.2948	81.1149	30.9761	71.1586
23.8	38.3957	42.6395	47.9349	53.5328	40.8122	45.7003	62.1929	80.9513	86.2139	99.7848	49.0256	55.4962	45.9268	17.9409	19.7922	86.6134	81.9922	28.1572	75.5961
23.9	36.8073	37.1407	48.6705	51.8401	38.0141	37.0126	61.9383	80.069	89.955	96.8553	52.467	57.7444	45.951	15.3633	18.334	88.8296	91.6347	32.5327	73.2698
24	42.2276	41.3654	50.0972	51.6821	39.7237	41.9004	61.2013	76.3539	82.9061	97.7777	52.0273	50.1103	52.074	13.6881	19.9305	81.9265	77.3553	32.4792	81.4072
24.1	37.315	39.4206	49.3378	49.3218	40.5392	40.136	60.9617	77.8249	81.8684	97.2887	49.3289	51.1449	44.7014	15.258	18.7582	88.3317	78.0735	29.3563	88.1322
24.2	38.5068	39.3666	48.9867	48.708	42.4685	36.1848	60.5641	75.042	79.9304	94.2881	52.5751	54.4225	45.1826	14.2999	19.8887	84.1296	83.2616	28.8034	72.9915
24.3	36.9929	39.5992	50.013	45.1231	39.0998	43.3279	62.7968	78.0195	82.6556	93.8509	49.6369	51.8606	41.5382	17.4913	21.8104	86.3752	79.418	30.1184	83.5675
24.4	40.2196	34.9569	45.2018	43.6008	38.0174	42.3292	56.8147	79.1963	78.5283	96.2611	50.2915	55.0186	44.1147	17.8055	11.249	90.8292	77.5876	34.5942	79.1235
24.5	39.4023	38.0713	47.9048	44.9945	38.3672	38.194	56.6597	75.4896	79.0037	95.6117	50.5554	49.0029	44.007	15.9166	21.3251	78.8865	80.9863	29.5799	73.997
24.6	32.4669	35.7795	46.6951	49.4251	42.241	39.8728	54.352	77.0899	81.2	95.4583	47.6538	52.8663	45.9578	16.2099	14.6738	87.334	78.5913	29.8453	72.2109
24.7	35.3019	36.9151	44.6798	42.9326	40.0406	30.9525	53.8217	76.9385	80.7903	97.5889	48.7526	51.791	37.8895	16.4568	18.7711	77.2835	76.3403	32.6359	76.1508
24.8	37.9288	39.5698	47.5486	45.3215	40.6455	35.7972	51.6897	78.5881	77.8624	97.6286	47.0581	51.9176	41.9357	16.7538	15.8763	82.9318	80.5954	29.3978	64.1274
24.9	41.6032	34.3394	48.1652	45.7595	41.7709	38.602	54.371	74.3034	89.6273	93.1768	47.2855	54.8758	46.9182	15.0956	18.4126	76.1699	75.3817	30.0748	70.9443
25	37.0398	35.4051	44.4155	45.583	40.4981	26.9747	56.2976	80.2306	80.0386	95.9344	49.6232	50.8939	41.9157	14.4524	19.1928	80.1178	76.5146	32.3255	77.7032
25.1	32.1932	35.3148	41.9871	42.6206	42.6758	37.5528	53.51	76.4608	73.5898	95.4531	48.4301	51.3236	43.7564	16.3904	16.8174	80.4885	78.7855	29.2799	74.2908
25.2	36.9312	33.7483	45.8456	45.4846	40.7377	29.8774	60.7182	77.2985	79.7657	95.2045	47.4151	47.6537	42.8023	16.6905	17.7722	74.3911	75.5366	29.8712	76.0346
25.3	30.7293	35.4925	43.8181	48.9329	39.8473	27.5073	54.6614	75.423	76.1373	95.1997	47.2343	47.8428	44.0748	15.1072	19.3158	70.7205	70.3197	31.6257	75.3107
25.4	33.3757	34.8416	45.2684	45.3473	42.0499	34.1757	51.6221	73.0013	75.5981	95.0522	46.6963	50.7633	39.4647	15.8959	18.7112	77.1979	71.0335	32.6085	81.387
25.5	31.2772	34.3649	50.0954	46.8415	40.9937	33.8696	53.2401	75.6568	70.8551	94.3282	46.8565	49.8268	41.9093	15.7648	19.7056	75.7304	72.7595	27.6711	76.3304
25.6	36.543	32.6771	49.6398	47.7233	39.1148	30.205	52.0988	76.836	75.447	91.9983	47.3842	51.939	42.5791	14.57	19	78.2092	76.7979	28.7429	73.9803
25.7	34.2509	39.0883	46.9844	47.3426	41.1689	32.7005	47.538	75.6367	78.4857	93.6028	48.0782	46.2866	42.914	15.2553	17.1347	78.0871	72.1558	27.5803	70.152
25.8	33.8808	35.4644	42.9882	46.119	41.3063	32.9157	52.9525	78.3963	75.6243	95.3783	47.9131	47.6099	39.3089	16.846	15.662	72.1764	70.3062	29.3666	75.3082
25.9	30.2275	35.3392	39.9637	43.2962	38.2971	41.5287	52.5074	78.9947	87.7503	91.1805	48.2934	52.2584	41.2741	15.6079	17.6717	75.4164	74.7082	23.5132	71.2971
26	31.9108	34.3099	46.4383	41.1095	37.9495	26.8526	56.0417	72.839	80.8306	88.4922	46.5506	49.0637	48.8314	15.7428	20.4999	81.0049	74.7548	26.877	81.8435
26.1	32.7911	37.337	45.3345	45.6465	35.0134	35.0935	51.2582	73.0324	87.3135	89.3783	49.2338	49.2586	35.7148	15.9357	24.8053	77.053	67.3867	29.3776	73.5383
26.2	36.7979	35.3817	43.6134	49.4212	37.5477	35.6121	51.4209	72.3215	81.094	90.3606	46.6736	45.8789	44.1295	13.8502	24.081	74.861	72.8493	27.1341	67.8642
26.3	32.42	36.724	43.0729	46.3241	39.0234	37.3804	47.6598	76.4212	85.0483	89.7291	43.1922	42.5297	41.4486	13.339	13.0145	73.5704	66.8271	26.5722	80.157
26.4	30.7829	35.3373	42.4778	44.3057	39.0082	39.9807	52.6286	72.3786	89.5198	91.3407	47.5823	41.4879	44.9263	15.0228	22.2735	82.7351	68.3084	26.2029	69.1577
26.5	33.8381	32.8285	40.7808	47.2276	37.4627	31.5524	45.8943	74.8935	82.4713	92.2918	44.1867	39.9652	42.2658	15.1619	17.9741	81.4878	66.7333	30.8387	80.4726
26.6	32.5951	30.8229	41.1544	45.6929	36.7499	36.9242	49.4722	73.6338	91.8287	91.9015	46.6125	46.4417	39.1153	15.0705	16.1919	80.2333	68.3559	24.6975	75.2842
26.7	33.1007	32.7787	43.8532	44.9356	36.9897	34.7422	47.5616	70.1757	80.5382	91.6031	42.4853	45.0227	40.0835	13.7804	17.7393	77.4674	65.7925	26.7604	74.8154
26.8	34.7236	34.0461	38.255	45.7138	34.6574	44.779	44.4876	75.0395	85.2248	90.8476	46.2361	47.2714	40.0623	13.7645	20.8497	72.543	73.0603	23.742	68.8736
26.9	36.436	34.6367	41.5594	42.2323	35.2867	28.4527	45.5294	72.043	86.4053	91.6803	45.722	46.6643	38.8736	14.9005	16.1613	79.1051	62.8788	26.5773	71.936
27	30.3717	33.3516	36.1427	43.2312	36.3481	34.5831	46.7757	70.5761	83.5271	91.8216	45.9895	52.983	38.1921	14.6447	16.6679	79.353	64.2432	24.5851	67.2935
27.1	33.3144	29.5355	36.9345	44.6706	37.17	30.4133	41.7309	67.1224	75.8966	91.7508	45.055	41.2314	39.5092	13.7732	21.7014	79.5503	66.5114	26.5957	74.6113
27.2	31.3451	29.2917	38.8059	43.52	35.2013	30.9284	45.5615	65.5477	79.9828	93.1981	47.4287	48.2656	41.7453	13.6063	17.2766	73.3231	64.4408	27.6454	66.3645
27.3	30.6843	29.9951	38.2724	41.1354	36.2806	37.0701	42.1989	68.4016	76.0953	90.128	45.4931	39.9672	45.3008	14.0664	17.325	68.5937	65.9034	27.9135	73.0762
27.4	30.2149	34.3558	36.9624	41.4838	36.7905	38.4317	46.4709	66.2509	70.1764	87.9646	47.5419	44.9219	39.6123	13.7553	15.8595	74.6972	66.6057	26.116	71.4073
27.5	31.4622	33.492	34.8897	41.2649	34.9165	37.3322	41.2839	65.7904	72.4266	88.0769	46.4641	43.8114	43.6539	13.5027	17.4351	72.4241	65.3629	17.3177	66.7754
27.6	27.5488	33.0616	36.0256	40.5506	36.5734	34.9268	42.2086	65.3937	75.5873	89.6349	44.6632	40.9234	40.0258	12.4133	10.1862	70.5174	63.3879	21.6707	66.77
27.7	33.1467	34.5234	35.297	42.3163	35.5821	28.6565	44.0728	64.3151	76.1638	88.7084	43.5254	45.8336	42.2058	12.0935	16.8622	68.2166	63.4424	23.8385	61.7069
27.8	27.3618	37.0287	38.5035	43.9505	35.8658	29.4108	39.1832	65.5201	70.2121	90.0207	43.8169	40.6613	41.8704	12.2256	20.3548	72.219	59.6351	21.6778	71.8169
27.9	31.3926	33.8519	36.2615	43.4853	37.2362	39.051	46.7706	70.5416	85.2387	88.8016	43.9558	43.7331	39.2634	10.4887	15.6207	70.4088	57.5551	24.5047	62.0718
28	26.0673	31.6133	37.8501	42.3411	35.1059	34.1318	38.726	62.5543	68.514	91.1397	46.9441	42.0688	42.4759	13.9644	12.021	72.9708	66.7142	22.8938	64.6937
28.1	30.0515	28.1482	34.6419	40.0076	37.3612	29.1904	42.2079	63.5588	74.4046	85.7167	45.5112	35.5366	37.5296	13.0636	17.506	69.2654	65.1128	22.4613	69.8314
28.2	32.1003	30.32	38.4377	43.1704	34.0638	23.649	42.0575	68.3045	63.8404	88.1873	38.8132	36.8977	38.6307	12.2075	12.4336	68.3837	71.8072	23.1672	56.7352
28.3	28.0645	31.8898	34.9611	44.6938	34.7705	29.0661	41.9139	64.275	65.6631	87.8176	43.4579	41.3861	39.8311	13.4446	15.2719	68.1855	63.4887	23.28	56.0122
28.4	31.0193	34.5258	35.9145	41.0092	34.0844	22.5369	37.8562	65.0358	70.0498	92.2954	43.2925	39.3554	38.5036	12.4807	16.634	65.794	72.5113	25.6402	66.7544
28.5	28.6721	29.9448	35.4332	41.4166	34.1277	32.3935	40.9581	67.4691	68.429	86.5048	43.9577	42.8124	33.9528	11.0656	11.6445	63.0865	67.3787	25.6453	65.5968
28.6	29.2618	32.2711	36.1689	39.2992	32.1208	32.9719	38.8208	60.7667	70.5604	85.5466	41.1566	39.844	42.0117	11.8361	16.9753	65.4789	64.2901	21.8647	63.385
28.7	31.4236	33.5544	32.4162	42.479	34.1334	35.9951	35.3565	65.4658	64.3229	83.839	40.8061	39.1255	39.8738	14.0488	14.331	67.7241	57.3716	23.1567	63.6243
28.8	25.8518	32.9929	33.6324	44.7617	33.0253	30.0672	42.2916	62.6595	69.7332	85.1397	37.4483	42.9449	38.9578	14.046	13.4997	69.0219	56.8936	21.4686	65.687
28.9	25.6053	31.8037	33.8823	44.1624	31.7982	29.5402	39.1889	62.3311	71.2017	85.0205	44.2762	38.0485	37.8648	12.6912	15.0192	75.1923	53.509	20.9104	61.7067
29	27.6253	35.2803	34.4876	40.1489	30.0768	31.1211	37.8993	65.9778	67.4682	87.9714	42.3696	42.7512	41.0334	13.3765	15.6534	68.0991	64.708	21.5959	61.5786
29.1	26.7831	29.4866	35.3497	43.6491	30.2173	29.9445	39.2995	61.6772	69.8781	87.9529	43.5064	38.5471	39.3274	13.4047	15.9649	68.2247	53.8229	22.4171	65.1162
29.2	28.801	35.4488	35.9162	41.4111	33.3782	33.559	41.4179	64.4906	65.4749	90.712	42.5624	39.598	33.4312	12.3707	13.61	66.5726	62.3672	22.8972	60.9844
29.3	24.9933	31.7331	28.8025	41.5172	32.2779	34.5025	39.5586	64.183	71.8108	89.915	41.6985	39.2467	41.5712	13.418	12.9359	66.8442	62.1985	18.3688	53.4297
29.4	27.1756	35.2759	32.6663	38.935	33.9628	34.6643	39.5714	62.4248	73.0074	86.2376	40.1015	43.2163	36.8038	12.5897	14.085	65.0152	62.4139	22.8252	62.0752
29.5	24.2372	32.0069	32.925	41.8847	33.2326	32.8585	39.1944	58.952	74.5812	87.1176	41.9841	42.0773	29.7924	13.75	16.3622	67.551	54.1273	21.1022	57.372
29.6	22.7664	33.4779	30.2383	39.6545	31.9116	26.7563	39.8974	61.8818	70.7376	86.8152	42.3457	40.9389	32.0172	13.7565	13.5445	60.8755	63.3	20.0595	66.0975
29.7	27.2104	31.196	30.4854	37.7362	31.6442	32.3377	37.3452	59.775	69.3309	82.969	41.1153	38.9246	33.0405	11.7308	8.55759	67.8166	58.2195	18.9277	56.5338
29.8	25.7558	32.286	30.8545	38.7588	30.7568	30.7368	33.9153	63.9964	58.8942	87.5867	44.2446	38.5935	35.9127	13.4334	17.3505	63.8556	60.6568	24.9695	54.0615
29.9	22.9167	32.3279	29.7473	39.9993	31.2348	24.8368	40.153	57.7181	64.7598	82.2351	42.7658	40.9345	38.1517	13.0332	6.95046	66.3424	57.8445	18.7467	44.8675
30	21.6205	29.9716	31.9001	41.4498	30.2405	28.9953	38.3974	60.8764	62.5951	83.9248	41.3346	41.7412	31.9093	11.3891	13.7539	68.3675	58.5079	19.3699	50.8917
30.1	29.2792	33.0099	34.1734	40.3013	30.0397	28.2483	34.7873	62.6319	71.8989	82.8645	42.4993	41.6615	33.4806	10.9484	10.6764	64.2267	59.1052	18.7087	56.5639
30.2	24.3531	33.823	31.6489	38.8381	31.2391	33.3958	37.0765	60.792	67.4155	82.7384	39.9706	37.4734	34.5687	13.3692	12.5281	66.2995	60.8432	20.1907	51.1666
30.3	25.1407	33.9758	28.8662	41.7726	29.8406	29.975	37.7701	59.6116	61.0732	81.9106	43.2854	35.9458	30.8168	11.7754	9.71642	70.4899	57.6016	19.2996	50.0487
30.4	23.3968	35.4237	29.8762	41.6097	28.858	30.8536	33.2177	60.2151	58.0489	83.8729	39.9504	36.5172	33.8489	14.0961	15.7494	64.0574	53.0013	20.6046	53.8796
30.5	21.481	31.6944	30.6144	37.7871	27.9946	27.8428	38.8482	60.5856	54.1082	82.7476	43.3682	35.0582	26.6148	12.2525	8.38229	58.0256	55.2039	21.1781	44.7499
30.6	21.6597	32.6916	29.0001	39.3189	28.896	33.2795	32.1053	59.9563	52.7549	83.9519	38.447	37.2186	31.2083	8.18643	14.5286	57.2495	60.1841	16.6276	52.3962
30.7	21.8191	33.3939	29.2254	39.5264	28.5915	35.6182	32.8546	58.732	45.4809	81.8636	40.148	40.0325	34.1216	13.4823	10.6252	63.0401	57.8334	17.3256	53.7978
30.8	25.4676	34.816	29.9548	39.2436	30.3454	28.4373	34.362	58.2843	57.4122	82.2704	39.821	37.4195	35.1087	13.3299	19.5537	64.8789	54.78	19.8652	60.5029
30.9	22.5068	34.1579	31.2792	36.7803	27.3802	33.0349	31.796	60.7419	54.6977	80.4326	40.4184	37.5594	25.4001	12.158	11.2202	61.1209	55.7532	19.2483	58.1474
31	24.2701	25.6668	25.5988	36.6458	27.1322	30.2609	35.621	61.5215	51.8458	81.616	40.8715	35.683	26.2789	12.3707	9.37224	63.1539	52.7441	19.3622	47.0814
31.1	21.9876	32.6225	28.4246	40.9381	27.8471	27.6883	31.7682	60.0053	57.8872	83.8122	41.8312	36.7141	27.6077	10.8307	14.9647	65.7574	56.6781	19.6025	60.154
31.2	24.0714	35.244	28.1423	35.2233	29.9242	29.9882	32.9444	57.6246	57.7663	82.6441	42.3034	32.3398	31.2196	11.863	11.5661	63.4589	55.4256	14.6114	58.0553
31.3	22.8228	31.852	29.5788	38.7452	28.526	34.6198	33.0439	60.108	59.1936	84.0954	40.7082	35.4874	28.7011	11.5624	13.4569	59.9918	53.9987	15.2586	57.4824
31.4	19.7748	30.4897	28.8214	36.3954	30.0686	37.3371	30.8792	58.1226	49.2618	81.1825	39.9204	35.5799	34.3031	10.4022	11.0237	60.5359	54.9562	13.4621	49.9568
31.5	16.6239	35.0196	26.3564	35.0262	30.7197	27.5152	31.1531	57.9327	58.3812	83.626	39.7379	35.7756	31.1891	10.5232	10.3769	65.127	46.0531	9.44362	49.8638
31.6	19.3896	33.4713	28.4799	36.299	26.9721	23.5427	34.6741	62.2496	51.4109	81.4897	37.6728	33.0294	34.9088	12.3796	14.6243	64.9828	54.5047	17.3425	48.3418
31.7	17.432	37.2902	30.3317	36.2066	27.7248	20.5313	31.0958	56.7985	56.3911	79.3531	41.5056	30.6278	26.88	11.7932	15.36	61.1464	50.2124	20.0934	53.4653
31.8	24.9444	33.4929	28.9744	36.7367	24.5591	20.34	30.5426	58.1449	61.42	80.8844	39.0762	23.884	30.1799	12.413	15.2446	66.7615	51.7793	15.7932	46.759
31.9	21.7788	33.9191	27.7272	34.1548	27.1676	22.885	34.4549	59.9114	53.8582	79.4979	40.0895	27.9257	24.2399	12.2096	15.1325	58.8768	51.5189	17.2813	48.4244
32	20.4008	29.9638	27.616	36.9122	26.2121	23.3594	28.2549	61.6243	51.768	79.1158	37.8844	34.6007	26.8009	12.5793	15.2598	56.6367	46.0836	17.6546	54.4677
32.1	15.5487	34.2383	27.4391	37.4639	26.7176	19.5199	30.185	56.8475	59.6719	81.5336	37.0026	30.3919	31.3999	12.3088	14.4594	62.4001	50.3344	14.6142	47.7909
32.2	17.3122	34.5713	26.9915	34.4766	26.453	28.8718	32.0123	56.1978	52.3603	81.135	37.6388	30.8429	27.1771	12.3748	10.1745	63.438	50.2688	18.1207	45.4556
32.3	20.9702	32.4789	24.4074	33.8173	26.0928	31.6593	30.9019	57.7296	49.8336	82.5581	36.7132	27.2188	25.8355	11.741	12.2002	61.9139	50.6541	19.5528	45.9512
32.4	20.663	32.2143	25.1895	33.1637	24.3979	36.1738	30.8528	56.9054	51.6093	76.4445	37.7172	36.2998	34.5904	9.90572	12.6208	62.3792	47.3313	18.3738	42.5849
32.5	20.6161	33.1495	29.3706	32.2192	25.1594	24.8575	32.2361	54.7259	46.5054	78.3924	40.0714	34.2981	31.3563	11.3871	11.8665	61.8902	52.8483	15.5336	50.0673
32.6	20.3041	35.0565	25.0744	33.7899	25.0018	25.4711	31.9736	55.2608	58.403	81.5177	37.9969	25.3234	27.523	12.9403	15.2848	64.3212	47.8724	18.5016	52.739
32.7	18.6143	31.8235	26.786	32.841	24.4379	17.9189	32.2712	55.3075	58.6067	80.167	37.3724	33.8755	35.5377	13.8572	15.7342	69.0042	47.8348	18.9907	40.7494
32.8	15.4512	30.796	22.8009	32.8895	23.2762	19.1771	34.8283	56.8822	55.3257	79.2507	37.0968	39.4058	30.201	9.67405	10.7905	63.0428	49.8194	17.4298	37.1901
32.9	18.823	33.4494	27.3654	30.1387	24.5737	13.6635	34.0663	56.2105	51.4956	78.7644	39.3171	33.8353	30.4222	10.2463	12.5362	64.5014	47.5896	14.769	45.8412
33	16.7457	28.4929	23.842	31.6067	22.8673	27.7306	28.9988	54.6726	59.2029	82.0358	37.4557	26.4239	29.3836	11.1842	8.33472	65.5911	46.4231	15.4017	41.5895
33.1	14.719	30.4643	23.1442	29.5211	22.3472	25.5318	32.5506	55.7615	54.631	78.6264	34.6248	19.8541	31.0249	11.0117	12.6387	58.6231	48.795	19.1352	48.6329
33.2	16.9056	27.0232	24.5968	30.8809	21.6237	28.2913	30.8875	51.6787	50.509	78.8044	35.5656	29.3351	30.831	10.3479	12.5656	57.2923	47.1818	15.6629	43.265
33.3	14.9438	32.3136	25.4889	29.5725	23.6265	29.6394	31.6179	53.4732	47.0407	79.966	36.4054	27.4489	27.2077	9.43637	10.7606	57.6228	46.2716	19.5267	43.4002
33.4	18.8996	28.2867	27.218	31.8271	21.232	35.9207	30.5201	53.7319	48.3097	79.9751	39.4672	29.6883	31.9103	11.0263	6.99647	60.1054	50.3738	13.1893	37.9312
33.5	19.1315	31.1803	26.503	31.8446	23.6262	33.7581	30.2023	51.6224	46.4308	78.6295	37.2508	32.5758	24.3015	10.749	13.5277	53.4449	47.2799	16.3157	44.238
33.6	19.2311	30.7713	26.938	31.7306	22.2972	33.5451	32.7975	53.4436	52.9359	79.1224	35.5135	31.293	28.6964	11.8673	10.5313	56.9579	45.2397	15.6848	47.162
33.7	15.2341	29.7718	25.6442	31.4626	21.2986	30.9806	39.2999	53.8944	49.3269	78.061	35.242	31.9744	27.5451	9.73489	11.4437	57.507	49.6372	17.9855	39.3305
33.8	13.1366	27.9873	27.2844	28.3618	18.5389	33.1955	33.8259	55.9096	53.1949	77.3587	37.7489	27.7586	32.2864	11.4459	14.5674	57.5335	50.7292	15.0628	43.5721
33.9	18.2677	30.3975	25.5101	30.3343	22.0064	28.4429	33.4947	54.9905	51.7578	78.5665	38.2092	31.2684	30.51	10.1034	18.3569	58.9902	44.9488	16.8945	40.2935
34	18.3242	30.9005	25.0721	30.9737	21.2771	29.8855	32.1382	55.5661	44.1893	76.4861	35.628	18.7289	26.7499	10.5275	13.6632	57.1627	52.0691	13.7871	39.2746
34.1	18.6797	25.6439	24.4439	29.1742	18.6184	23.2972	33.6915	51.4135	49.3113	79.7738	37.0147	23.1888	30.6635	13.3185	12.4567	66.0378	40.7582	15.1013	40.7094
34.2	17.8431	25.0838	20.1607	28.3042	20.9335	20.8221	32.9606	53.3097	49.6045	77.6524	35.3055	23.3952	29.4407	10.9174	12.3556	58.7559	47.0778	14.6037	39.3924
34.3	17.2096	27.5384	28.312	28.2829	19.5102	23.1057	30.5081	52.3104	44.6086	80.6111	34.6381	30.8481	26.0457	12.1448	13.4207	62.2074	45.0322	16.2317	45.8701
34.4	17.4838	33.7618	24.7435	23.3497	19.1251	18.5195	31.0203	55.4571	46.815	77.3092	35.3793	27.9064	29.4194	11.8479	13.8564	61.8511	45.1238	12.3297	38.327
34.5	14.9491	28.473	28.4759	29.4869	17.8394	20.5237	30.5697	51.8659	40.961	79.5924	36.71	29.7697	26.7985	11.5422	14.424	62.141	46.1022	13.983	43.8183
34.6	17.3143	29.1924	26.0236	26.0497	18.9031	20.5689	30.6277	56.089	50.8833	78.8736	37.8224	27.8038	28.1642	10.8087	11.954	54.0909	47.3827	14.3308	41.2237
34.7	14.6108	33.1073	23.7173	23.2761	18.4139	18.084	32.0878	49.3827	47.8044	78.7993	36.1812	25.4345	28.011	11.4055	11.7687	59.7413	48.6558	14.0037	42.0084
34.8	15.3752	26.6966	22.2076	25.9629	17.2146	12.4772	32.9156	55.7921	42.6078	77.0933	35.0445	32.6935	27.644	10.9908	7.64834	54.7794	40.0489	13.6434	39.4786
34.9	17.0732	29.842	24.1705	26.2972	18.2238	19.1278	32.4592	50.789	43.7498	76.8732	34.0922	27.6885	21.7445	10.3809	-20.0067	58.5204	41.4294	14.0359	38.2332
35	21.0849	31.5381	20.9231	28.1927	17.1041	29.2804	33.1885	47.9122	35.8314	77.3553	37.9415	29.3757	26.1429	8.88468	-16.7035	56.1955	41.5939	11.0285	34.2278
35.1	17.533	23.4128	22.0012	31.9642	19.678	22.3786	31.3995	50.466	38.2221	76.3556	36.4403	26.2945	28.3776	10.5769	-14.3181	57.2842	44.9656	15.5735	38.1311
35.2	19.2349	29.392	21.9774	26.9897	18.5441	24.2043	27.188	48.3342	41.4722	79.2088	33.1766	24.6027	21.0249	10.2836	-10.5592	59.0707	44.7185	14.9407	35.9352
35.3	18.7053	26.9511	20.3598	26.2231	17.6372	11.055	29.3096	53.0413	36.5431	76.0148	32.4132	29.9615	25.905	9.92478	-8.95703	55.8131	44.3015	16.0628	43.2517
35.4	20.8868	27.6358	23.2608	26.7758	18.0356	17.3866	28.7778	51.0265	28.3791	79.4363	33.5874	32.2452	25.1747	10.4441	-19.8735	58.7264	42.3299	11.9428	45.2441
35.5	19.5656	24.8197	21.7621	27.2979	19.7984	15.8438	28.4189	47.5775	41.1994	75.8559	34.3701	29.8357	21.6333	9.94302	-21.9274	58.8098	51.9573	14.2702	42.3377
35.6	18.4212	24.2285	21.4894	25.7611	19.0048	13.6411	31.7595	46.0398	45.5429	75.6808	31.4949	28.4494	29.2502	9.7817	-12.7565	59.6245	43.5316	12.5266	38.6004
35.7	16.5119	23.8458	23.7408	26.5354	19.3671	8.63789	31.517	48.7793	35.5903	76.2846	33.1133	26.5156	29.2451	10.3971	-16.9531	59.1533	48.7723	13.669	40.1499
35.8	13.2857	25.5503	22.2663	25.2799	17.9706	17.6852	29.2566	46.474	41.9251	76.0182	32.634	21.9606	26.1458	12.2973	-18.0174	53.8944	39.8389	13.7613	39.0522
35.9	7.73167	28.1425	20.8372	27.8412	18.5814	18.1283	28.7042	50.5369	39.8016	77.276	33.9382	18.6007	27.3051	11.2616	-16.6583	51.2331	43.7595	13.0636	41.8927
36	17.8385	23.5525	23.9118	27.707	18.4767	21.7995	31.513	44.8989	44.2301	76.0562	32.5227	15.3821	27.7887	10.7535	-14.7533	55.5137	47.7131	15.2721	47.9483
36.1	12.9433	25.7025	24.6869	28.4133	17.0624	15.0758	29.0729	47.7891	32.4843	78.7754	33.6039	17.9864	26.6902	9.40607	-11.4704	51.442	46.9979	14.5734	37.5432
36.2	7.7991	24.6407	20.2949	25.6055	18.0262	18.6221	29.3621	46.4757	30.4587	75.338	28.3221	23.2918	28.178	9.25607	-17.0789	53.664	45.6788	17.9277	50.1678
36.3	14.5668	29.0278	20.3151	24.1991	18.3276	15.2207	30.5172	47.7231	48.7963	73.7626	29.9568	23.9936	32.0732	9.80288	-16.6733	53.1306	43.8591	14.4502	35.4957
36.4	14.1542	23.7743	19.7219	25.9583	13.9058	17.5987	38.4412	43.545	34.6804	76.1484	32.8045	27.7421	23.5903	10.5489	-18.7959	54.3277	40.2449	15.2088	37.4058
36.5	14.3634	23.7166	21.3407	26.669	15.7866	19.2522	35.5415	45.5711	34.4879	73.7784	29.0077	23.2721	30.8931	9.87887	-19.9335	56.2476	40.8952	16.9413	36.5401
36.6	13.5035	20.5886	25.1425	24.7749	16.288	20.4934	37.9503	45.2748	27.4154	73.0484	32.8537	32.3429	27.1656	10.8422	-18.502	51.9907	37.5953	15.5041	42.4489
36.7	17.3655	21.8265	24.336	25.1166	17.9481	15.9075	31.4249	46.2916	27.9855	73.3987	32.0292	24.6561	28.5164	9.89535	-17.1399	48.0801	39.4761	13.0872	33.5554
36.8	16.6278	28.178	21.5427	24.822	13.9346	23.1751	36.5445	40.8179	38.7763	72.5376	31.977	23.9746	23.8186	10.3309	-12.7175	55.1669	40.3844	16.1241	45.619
36.9	6.65468	28.6184	23.6184	23.6774	13.2708	21.1705	34.9122	45.8	26.7739	72.9257	29.7808	24.5117	26.271	9.02952	-9.80025	53.411	38.8007	12.0032	40.5748
37	13.508	28.8318	27.2315	22.0615	14.9789	18.2663	36.9293	43.25	39.4785	74.5877	32.9003	29.6702	26.8732	8.73464	-10.8875	50.3372	46.2518	10.1879	41.5646
37.1	11.1699	20.4614	24.723	23.4383	16.4095	17.9325	36.9107	42.2511	35.5711	74.7883	28.7664	24.2358	27.8932	9.27937	-6.85492	46.6961	43.5053	17.0782	37.2981
37.2	15.5147	26.1993	22.356	21.6171	13.1666	12.9839	37.6014	44.0503	40.4534	73.6501	30.2262	24.5304	26.9564	10.4325	-3.69326	49.8407	35.5958	13.7798	34.0465
37.3	15.1651	27.1588	20.4872	22.928	17.0748	15.1659	38.8993	40.9133	24.8318	71.6661	31.3249	27.2123	25.2963	9.92718	-8.01876	56.4826	33.3861	17.5332	44.1991
37.4	11.2132	26.1428	23.3223	21.5441	13.7402	13.5331	41.3999	43.8687	43.5222	73.5177	31.9102	28.3336	26.065	8.68017	-7.6228	48.1692	40.5971	10.5686	46.488
37.5	6.01934	22.0613	21.8266	22.7034	14.4424	17.1799	40.9518	39.8054	33.7876	69.2044	30.9514	18.2237	23.6324	8.38159	-10.9613	50.1975	30.6367	12.7987	35.9012
37.6	11.7751	22.2905	20.4776	22.4654	15.6684	19.9308	42.6081	37.4071	32.6565	71.9658	30.3894	26.9476	26.1361	8.50699	-4.88505	49.2693	37.1255	11.8391	30.2784
37.7	11.0872	19.5158	21.4846	23.7279	15.0218	20.3123	43.8662	40.3391	42.1677	70.5244	32.3294	30.2517	21.6161	9.04626	-3.77304	47.6801	34.548	13.3987	31.3589
37.8	12.3771	21.0283	18.2806	23.7896	15.1199	19.8614	40.3517	37.5	39.4162	71.7109	30.0549	24.9208	29.8139	8.99462	-3.54497	53.6658	34.8197	11.1247	34.292
37.9	14.2425	21.7314	20.1572	20.3937	17.1253	16.2722	40.4079	35.2151	33.4042	69.7234	30.346	24.6519	27.3331	8.59196	-3.96743	47.1581	38.9493	13.4422	31.1098
38	11.1491	23.2376	21.2554	23.8049	14.626	24.1515	40.0991	31.2128	44.7553	72.2372	32.2362	22.3821	22.4961	7.92467	-3.77439	50.2591	33.1976	14.7186	33.9678
38.1	10.279	20.5557	20.8074	21.5736	14.228	18.5674	44.2368	39.4196	43.1217	70.0891	32.0397	22.0188	22.0062	8.88467	-7.45085	50.3125	34.594	12.7878	37.0516
38.2	12.9624	20.8682	21.2634	21.014	13.4619	19.8949	40.2002	42.2923	34.5317	69.1144	29.8701	22.1731	19.0234	10.5558	-6.26329	46.5588	36.3145	12.0963	41.9569
38.3	13.8629	18.6417	23.2379	21.1236	12.8173	13.9592	43.1707	38.9419	30.1952	70.8938	29.9506	16.7891	23.3494	6.88353	-3.38694	52.5302	30.0352	13.6408	34.5153
38.4	13.8621	22.0036	19.6781	23.6483	13.5712	18.0336	39.4071	42.3581	19.2226	70.7166	29.5973	20.6512	22.2246	8.86543	9.80073	50.7239	34.2774	14.7634	29.8278
38.5	11.125	23.8782	20.3007	23.8532	12.7764	15.0281	37.1992	38.5688	30.9616	73.3718	29.7526	17.3019	22.0743	9.63153	12.6421	51.5959	31.7891	13.8205	33.2093
38.6	15.986	22.3349	20.9306	21.7015	13.1663	5.01106	43.0624	41.8022	32.377	70.5879	30.4697	22.067	20.7598	7.74457	12.5567	51.6662	37.723	12.8874	36.0979
38.7	12.4791	17.6634	17.7892	20.7654	14.9859	16.823	42.0267	40.4619	17.8241	70.6368	30.1508	27.8127	23.483	7.71698	13.6113	46.3527	41.7134	15.6004	36.3538
38.8	15.66	23.0245	19.4184	22.3631	13.0113	-4.38331	37.8733	39.7316	13.5253	71.4227	29.6843	27.3227	18.5389	6.00328	10.7617	52.2407	39.5893	12.9184	32.6887
38.9	16.5421	23.4342	17.552	21.6732	15.4772	14.8931	41.2738	38.2605	24.0869	69.7523	29.6084	18.7125	21.2544	6.21921	9.73238	50.3258	31.3885	14.1813	30.0243
39	16.2819	20.1119	23.9658	20.3938	14.375	19.3957	39.0358	40.3429	27.668	69.3429	28.5248	19.8041	19.508	5.73198	8.97611	40.4963	35.6452	13.8059	30.2231
39.1	11.9971	18.5987	21.6966	22.5213	11.0829	5.48345	39.2014	36.8224	36.6721	71.8549	30.6932	20.3529	26.5441	6.23893	12.1957	49.1792	31.1405	10.9567	31.4598
39.2	12.7253	20.6556	22.1913	19.4825	11.0125	19.5368	38.9015	42.2939	12.0512	68.6834	27.8892	24.0174	20.3297	5.24945	8.80751	43.3706	30.4606	13.9922	24.243
39.3	10.4663	17.4866	20.9059	19.5362	13.8385	13.3691	40.3917	39.6523	30.6747	69.603	28.7086	27.9791	18.9684	6.82501	10.1763	45.0023	29.7803	14.4671	23.2969
39.4	11.5472	20.3324	19.1775	17.991	14.0011	19.9069	38.3024	41.3785	27.3182	66.281	28.8786	26.3682	21.9743	7.27624	4.33817	45.4486	38.4124	13.093	22.4734
39.5	14.3429	19.3738	18.7688	18.2555	12.6107	17.178	41.4803	40.0389	17.7647	63.373	27.3871	23.8484	18.5315	6.22161	7.2432	48.0549	30.0781	15.1317	26.4175
39.6	11.9254	18.1841	20.5275	17.2952	11.3291	17.6052	36.0156	38.1558	34.7637	65.908	29.1417	25.5109	16.4521	8.55323	10.6691	52.03	27.3753	12.3054	28.7037
39.7	16.1303	18.8536	19.7988	19.8125	10.7165	13.3649	40.3106	41.3619	34.6232	70.1624	28.5655	32.8981	21.2179	6.62698	11.6229	48.2251	37.1711	10.4016	24.7632
39.8	14.9009	17.4405	16.3918	19.3375	12.6357	11.0207	35.4351	37.7815	13.6485	68.7139	28.2875	30.8187	21.0763	6.99607	13.2102	49.3126	31.2572	12.1194	29.3964
39.9	14.9592	15.839	15.7372	19.4019	11.4185	10.81	36.8961	36.2873	20.2251	68.2719	29.4736	22.1994	27.0148	6.3387	12.1931	46.0191	30.1753	11.7312	30.5783
40	16.1297	16.1915	18.4321	21.9714	13.4652	11.6839	39.7369	37.3722	14.0071	68.2812	27.4434	27.37	23.5581	7.06196	11.099	45.0829	26.2725	12.9344	27.3945
40.1	15.4644	13.6883	18.2759	19.809	11.4142	18.7734	38.9598	31.9745	25.0086	68.1658	29.3122	23.7178	15.6647	6.30145	7.80054	44.699	32.8663	10.7213	29.5413
40.2	14.5921	14.7648	20.5767	16.5908	13.8637	15.4841	38.346	39.2279	23.1803	64.2998	26.4516	29.7321	20.8627	6.77962	9.52132	45.8871	32.1438	12.1909	30.1005
40.3	11.5252	12.2302	20.2184	18.6928	13.6955	18.116	35.869	36.6263	12.5556	68.4751	28.1069	20.6575	22.1057	7.48474	10.105	46.6299	28.651	11.5279	25.6468
40.4	13.6055	14.6906	17.6765	16.8889	12.6182	10.7838	35.2864	35.7163	23.1108	69.8024	27.0865	24.5065	23.4529	5.86703	14.9232	39.0443	30.331	12.977	29.3459
40.5	12.4606	19.6117	19.8017	15.6447	11.602	14.9384	35.0168	33.1759	27.5563	69.6953	21.6783	26.7276	20.3019	7.25114	12.0494	44.7925	35.7246	10.4521	19.0042
40.6	13.4224	14.2657	19.6199	10.7762	11.9456	14.3021	37.7653	31.4857	26.0353	68.522	27.432	20.7369	23.9058	6.42851	5.91448	49.3475	29.9821	12.954	21.9612
40.7	9.46965	19.7324	19.2409	19.1824	12.0996	14.8418	39.1696	33.2076	20.186	65.7144	26.8382	19.0196	22.6102	7.42408	11.8057	40.8131	26.8349	14.949	28.2997
40.8	11.3075	13.3171	18.9379	16.4462	9.84325	14.9195	39.6412	34.9097	5.88527	67.4846	24.7173	22.7351	19.272	5.02191	10.954	44.0444	29.0493	12.8603	31.3992
40.9	10.3874	14.1039	20.5954	20.3878	11.7599	17.723	36.916	39.5471	9.64845	68.4413	26.358	23.8599	20.1371	7.48001	9.5868	42.9637	25.1139	13.5304	25.7251
41	15.2494	12.8488	18.861	19.8894	12.8325	10.2484	33.4383	33.2565	13.5836	67.8174	30.4654	19.9023	13.225	6.44404	9.00637	39.6677	29.2031	9.13823	29.6918
41.1	13.9199	14.6298	20.4279	15.5633	13.1869	19.6921	33.0994	33.8488	11.1795	65.4586	25.1018	24.2992	18.9702	8.25096	9.45801	40.1907	29.8722	8.71244	29.6548
41.2	14.3696	15.0132	21.3858	18.8355	14.0064	21.2619	32.5946	35.4151	1.98413	62.721	28.0133	30.5161	21.2696	9.19291	8.6117	41.9158	26.4743	16.428	31.0517
41.3	13.5667	11.615	18.6074	16.6443	11.8979	18.3211	36.9785	32.9514	9.30067	64.2037	28.5638	27.8433	17.7524	7.91458	10.5019	43.0077	32.1791	10.9024	36.5661
41.4	12.1024	16.301	19.8764	18.4021	13.4717	12.3737	32.2923	36.1167	13.7897	65.6682	28.1301	24.5387	17.2426	7.6346	12.0474	45.7062	32.267	11.2237	36.9482
41.5	11.0588	14.7335	14.8886	17.6666	10.7662	20.5822	35.3861	33.7759	11.021	63.3056	23.5785	18.376	20.2443	7.42898	9.12803	42.1683	26.3249	12.4798	28.0513
41.6	12.6938	12.7094	17.3194	17.5841	12.9648	17.3405	38.501	38.1528	11.2248	64.8891	26.2678	21.1933	16.0372	7.66824	8.78887	40.2281	28.4766	11.6102	30.4438
41.7	8.61183	13.5937	12.9059	16.2365	10.9638	16.4501	32.9627	33.0102	4.01971	67.0594	25.2494	21.308	23.7252	7.94859	10.5033	45.468	32.3649	11.0642	29.494
41.8	12.552	17.2176	14.5987	17.04	14.0375	21.3966	36.3506	35.3568	-3.46499	67.7254	25.0486	11.4048	19.7623	8.04244	12.5215	44.0744	31.4342	11.2986	27.2487
41.9	16.1444	16.4418	15.8159	17.3693	7.16562	10.6428	33.961	36.4525	7.85869	65.1581	24.233	20.2513	17.1604	7.43689	11.3036	38.355	30.0773	14.1335	22.7974
42	10.8234	19.3003	15.8756	18.3647	10.6545	19.1628	33.1901	35.0009	0.029033	64.6814	27.1196	22.3758	18.8777	7.42895	12.4176	44.1582	32.2304	11.9172	22.434
42.1	18.3364	15.8238	12.7135	15.0804	9.12968	10.8052	33.8777	35.5267	-7.60673	63.438	25.6679	22.1669	22.3521	8.0344	8.90833	38.5775	29.1722	14.4818	18.8256
42.2	14.093	15.191	10.9211	16.1056	9.6713	7.95044	34.5758	32.6783	7.15397	66.5595	25.9558	24.8272	19.4794	8.06498	9.67764	44.3048	30.5734	11.3752	29.5112
42.3	10.9134	13.5735	14.5345	15.8764	8.16945	12.8794	33.5873	33.7185	2.3376	62.4347	24.5944	24.5164	20.8515	6.785	14.3054	40.2811	27.7455	8.96075	29.1156
42.4	13.5018	14.1531	11.3966	15.8712	10.6853	6.80017	34.8472	36.9457	-8.57469	64.0752	25.7844	28.4658	18.6767	8.0115	12.4396	43.2218	27.9884	13.1002	30.1457
42.5	15.1898	16.1647	14.1526	16.8964	9.58098	19.3775	35.5629	33.878	0.607597	61.757	23.9478	27.9783	17.2051	7.38459	12.4666	48.9378	29.6403	11.3357	22.7371
42.6	10.4218	9.59572	14.2414	16.7982	10.3906	12.4651	37.2685	32.6066	2.97648	62.3725	24.9294	23.9346	18.8086	5.86616	15.2343	37.7283	28.6835	11.536	30.3697
42.7	15.7133	10.3499	12.7842	14.6403	7.02916	11.481	34.0327	34.7626	2.66601	61.3751	26.2945	25.0236	18.0912	5.90141	9.75297	38.027	24.338	15.384	26.6627
42.8	13.7606	12.3753	12.5486	16.7289	9.27055	8.71278	31.2163	36.4811	12.1851	63.8351	24.6977	26.5	15.3508	5.21325	10.8363	49.7595	37.6621	11.9506	25.4754
42.9	13.8959	10.8415	14.4067	11.6712	11.9917	0.433122	36.0441	33.7206	-6.38364	63.8082	24.4594	23.661	23.8	6.88731	11.4369	42.5761	26.1004	10.1102	25.2321
43	9.86323	9.52281	11.4093	15.2836	9.00777	9.84532	31.8248	29.2393	-12.4044	63.5315	23.0216	28.3949	14.9126	5.3315	14.4214	35.4552	36.5721	11.2756	27.9798
43.1	11.3608	9.0111	8.63233	16.4622	6.2924	6.13017	30.604	30.2501	1.40074	62.7435	22.2056	22.2548	17.8184	6.13593	15.0839	39.2701	32.0538	12.2987	25.0679
43.2	6.8466	11.0615	11.152	13.7958	9.56079	3.4831	29.4906	27.8698	5.07488	63.3341	26.0931	21.4381	17.9658	8.14082	10.4739	45.2055	25.2511	13.6735	21.4264
43.3	13.3402	9.20575	10.5407	15.7691	9.46167	-1.51439	35.1991	28.4323	6.31253	62.8747	22.7864	25.4315	13.0144	4.87777	15.5438	39.3428	22.6158	10.6932	27.7966
43.4	15.6457	10.5663	7.2726	16.5812	7.26264	9.89553	35.8567	29.011	6.54416	62.6295	24.7059	27.0299	19.0937	5.67018	12.4253	41.922	27.2563	11.2842	16.7712
43.5	10.9965	10.6369	8.67928	16.199	8.4622	11.9092	31.3651	33.5658	4.47925	61.3812	24.8617	20.9113	12.5062	7.05771	13.6984	43.0685	34.0177	13.8419	20.0676
43.6	13.2173	12.1997	12.2268	15.3073	7.35873	10.3111	34.3482	34.6192	6.54702	62.6143	24.6152	26.4427	15.1876	7.24831	12.918	36.6152	32.617	12.4685	26.025
43.7	14.7295	10.3615	9.94915	13.3229	7.41345	13.5051	31.4823	32.9477	16.7438	61.9293	22.1388	16.7727	18.948	6.42871	9.77253	41.0112	29.7744	5.89814	20.5497
43.8	12.886	11.9391	11.6864	15.5779	8.65402	6.5686	35.9556	32.6426	3.41153	61.2886	24.812	23.202	14.6827	5.43828	12.0489	34.7817	24.9916	12.1768	21.8249
43.9	12.4006	7.60146	11.781	11.4825	6.99336	18.5766	35.9262	32.5792	11.438	60.8791	23.3595	27.1083	15.9308	6.65364	10.383	42.179	22.9725	13.1122	24.3793
44	14.3555	12.6848	9.24293	12.8491	9.71423	15.3346	35.8074	30.9681	23.8051	60.6829	22.4514	29.3465	15.2498	6.94822	12.6689	44.9422	28.4911	12.0821	20.1138
44.1	11.479	10.1201	9.46021	13.9753	7.91363	16.3933	31.2881	29.5236	3.31388	59.3309	24.4941	28.4494	14.0195	6.14002	11.2403	44.2448	18.3389	10.1105	21.1645
44.2	11.6082	4.45643	9.27602	14.2471	9.17125	10.9311	32.3003	33.6861	-5.3435	59.824	25.3944	33.6625	13.3672	7.67464	9.37496	40.956	25.6345	7.14457	18.4939
44.3	10.0821	10.6776	8.19225	11.3946	10.9764	18.0865	33.412	32.1176	6.61233	60.8783	24.9814	30.2867	15.2048	5.424	10.7063	40.0023	21.2485	9.26414	17.83
44.4	15.4185	8.39917	7.70504	12.3889	7.80009	11.3859	32.749	31.9252	5.20072	60.5845	24.6626	21.6873	9.99718	5.8357	10.7786	38.6661	24.0661	11.1348	15.6788
44.5	16.6597	7.02277	10.2377	12.201	7.23983	18.6891	33.0471	32.8152	8.97999	61.1513	22.5238	20.2554	18.4016	5.06955	13.1796	37.72	26.6709	9.41408	14.3672
44.6	15.697	6.58849	4.54823	14.729	8.27976	5.94345	31.4584	31.9047	12.8161	57.8047	25.8778	22.0988	17.8017	6.59601	12.3213	36.9938	23.2629	8.86988	21.0306
44.7	14.7138	7.62933	6.36129	15.8631	7.69048	13.3001	35.6338	32.2653	12.0988	57.924	25.2282	25.3415	15.8027	6.48177	7.36108	38.056	28.5816	7.24676	24.8754
44.8	14.5604	7.74123	7.59824	14.9382	7.502	5.99187	36.3407	29.4303	13.1039	60.9953	22.6371	26.5747	12.0127	6.6544	12.2188	37.7352	18.5524	7.70757	26.4769
44.9	14.78	4.95534	9.25885	14.627	9.35398	13.1496	30.1207	29.1759	10.0019	56.8743	22.4498	23.9989	16.8	6.06327	11.7133	31.4814	24.372	10.5565	33.0593
45	13.662	4.4893	10.7936	13.9881	9.22254	15.6945	34.3615	26.9314	1.25844	60.3881	23.1687	21.7183	11.104	6.23513	15.4178	37.3259	26.8558	11.3632	35.6478
45.1	13.6257	9.74357	9.67343	14.8674	8.92289	11.786	34.4879	31.2154	-6.48588	57.641	23.2736	21.6528	15.5649	5.50265	11.9818	37.8369	20.1845	11.6282	34.2664
45.2	11.4878	7.52091	7.53154	12.8219	7.77574	21.6342	34.9073	29.3741	8.69808	59.0713	20.0562	23.7334	13.0629	5.10198	14.2409	32.0763	27.5925	11.9966	35.3483
45.3	13.5455	7.69748	8.9902	12.4238	7.3578	16.988	33.4344	31.9922	6.14666	60.0496	21.1444	28.0754	22.158	3.30127	15.8447	39.6878	27.0409	9.69871	28.9603
45.4	11.9972	3.43071	10.3614	14.3298	5.47179	6.21762	29.4203	32.5586	5.01357	59.3456	22.8515	29.8519	13.4599	6.42085	11.9015	30.1732	24.4655	10.7393	38.1557
45.5	13.327	6.00586	5.55612	11.1914	5.88731	4.3782	30.1073	32.0378	4.81923	56.5652	20.8881	21.4258	15.9545	6.70073	14.567	35.5859	25.3389	12.149	37.2381
45.6	11.7875	7.39305	9.87659	10.6665	5.54472	-0.23287	32.8526	28.7675	0.274727	57.7782	23.7071	20.7941	10.0607	4.21503	11.4677	38.3207	21.6658	10.7473	34.3903
45.7	13.714	7.011	12.0361	10.788	5.04983	3.71524	30.9852	29.1156	7.40658	59.008	21.5048	21.016	14.4405	5.92597	13.6559	33.6185	29.747	8.86689	32.1013
45.8	7.75485	6.90679	10.4566	6.56868	4.07733	7.74564	33.1221	27.3205	5.73358	60.1781	20.1233	21.3903	11.7651	7.35412	14.0613	31.5159	27.5369	10.698	35.0285
45.9	12.9207	6.41698	12.2065	11.8456	8.04211	-2.54173	29.4595	30.0808	6.33252	59.5264	21.0385	20.0523	16.3749	5.32431	14.0105	33.3582	27.1005	10.5591	38.7145
46	10.2581	4.58842	12.1109	7.69807	6.57258	0.601815	29.8031	28.9469	7.10352	56.8599	20.7847	28.0797	11.6123	6.01801	14.0828	31.8616	22.4044	11.9297	42.7937
46.1	9.71791	3.59723	11.8728	9.03684	6.1041	9.49402	35.2737	30.0309	1.21192	56.6159	20.6575	23.5578	8.40447	5.54325	12.7304	40.3878	21.8192	11.2901	44.416
46.2	8.49465	9.82382	11.9056	10.4916	6.32727	10.0755	30.6187	27.2581	2.25826	54.5181	22.3768	24.7929	18.4426	5.47183	12.4503	33.6473	21.9408	14.2776	42.1275
46.3	10.9055	6.02359	11.6452	11.736	6.16934	0.62108	31.3543	29.4665	4.96855	51.6984	20.0798	13.3285	13.5302	7.18148	11.0944	34.3188	27.4391	12.439	44.0486
46.4	11.8934	11.6271	8.38989	11.2758	4.58371	4.91801	31.9085	24.6452	2.13304	48.996	21.2403	20.9802	15.0122	6.47703	7.91579	35.7852	19.6022	8.94796	37.1234
46.5	14.7886	6.08685	10.398	8.35962	6.45541	16.0638	28.9601	28.4632	8.94635	46.1794	21.664	24.2386	15.5954	4.66217	12.1258	35.6451	23.9112	8.83632	38.9519
46.6	8.53746	7.49382	8.9135	11.8288	6.68684	7.91226	30.0394	23.0544	2.93967	50.5897	23.675	20.7037	14.9879	5.83159	9.38865	29.9362	25.9551	11.4519	38.6184
46.7	11.3397	5.33386	12.8415	12.4252	4.52874	1.72166	27.9136	23.0151	-2.11802	48.8918	17.5898	25.477	8.64677	6.63416	9.36389	37.1441	17.5572	10.4565	35.248
46.8	9.37427	5.24589	12.4748	12.4647	5.30449	11.1312	29.5812	25.4309	7.82193	50.3822	19.5053	32.2127	12.9152	5.80913	10.1499	35.8848	22.9955	9.27279	37.7913
46.9	7.40037	7.29656	12.3582	11.7784	5.28675	1.52513	28.0231	29.9998	0.366627	49.4076	19.5665	23.5053	14.1764	6.29671	10.264	29.4081	19.6885	10.5728	44.2091
47	8.85809	9.9454	12.0029	11.9361	6.08958	1.57973	30.8852	30.1176	3.37316	50.3037	18.7017	22.3758	12.1813	6.1169	6.45183	34.133	20.3642	5.69209	37.3905
47.1	4.61336	6.25308	14.6463	14.4207	6.28497	3.43827	27.4862	24.9912	0.19731	48.7268	20.8122	24.1227	14.5235	7.04602	10.1027	33.9423	25.8385	11.6648	27.2081
47.2	9.72496	10.9063	11.2415	13.1011	5.59609	0.757356	32.7404	27.9966	-11.3786	50.1205	21.4199	22.3445	16.7484	6.74013	9.4383	35.1153	22.0679	11.7348	35.8425
47.3	9.25673	8.77302	14.1442	11.0719	5.85207	0.934189	34.2046	21.9554	-2.02021	47.6859	18.2844	32.8745	11.1265	4.87511	10.5675	35.631	20.3236	9.16955	34.1469
47.4	4.70444	6.51576	9.52175	12.1331	4.95117	-2.93506	31.8061	23.6295	9.4597	51.0511	21.0052	24.3517	15.5595	5.6849	11.7236	36.8128	18.7111	6.60039	33.9491
47.5	5.29444	6.18716	14.0061	11.4005	5.68922	4.05248	32.0742	21.9321	4.87032	47.3165	16.8532	25.2267	9.43388	5.94146	13.8745	39.5264	22.2439	7.51531	31.1565
47.6	9.89653	5.77834	11.5055	5.32229	3.20651	12.3918	30.5309	25.3103	16.0214	52.2869	14.6166	25.8675	13.3938	6.65756	6.71297	34.0568	16.2206	12.6439	34.9262
47.7	8.70841	8.84956	9.70918	7.4725	3.63927	6.33519	30.238	19.8565	10.1731	49.0652	20.2366	20.6201	14.0692	4.99701	9.41609	39.255	18.1062	9.45454	29.0659
47.8	8.79205	5.8956	9.10841	5.93886	3.62238	4.35047	31.2069	22.683	12.9488	50.6863	18.5029	23.2952	10.1063	4.62197	11.5262	34.205	16.5946	8.85385	33.0614
47.9	4.13743	5.91229	10.3748	8.87232	5.63872	-1.09058	29.2927	22.0228	14.2248	48.5312	19.6229	16.2607	11.735	4.41281	8.20278	38.1824	23.376	8.413	33.325
48	6.14253	6.01831	11.1124	11.0984	5.08113	2.36434	27.8984	25.3546	11.9647	53.1135	18.8017	16.0868	9.25241	5.00752	10.1414	41.7162	18.8104	9.06984	30.2399
48.1	8.29346	9.25173	11.6592	7.84381	3.66926	7.58954	30.2514	19.236	12.7754	48.935	20.9505	17.1374	8.32268	4.98547	6.38594	35.4902	16.3684	9.11535	34.5293
48.2	8.07574	10.2934	10.7839	6.52748	3.8937	17.2817	33.5151	23.8044	12.1182	49.916	19.1563	27.3807	15.6577	5.46842	10.1368	41.0536	19.433	11.9481	36.3001
48.3	1.18736	8.52253	10.2266	3.97072	5.08933	10.2149	33.495	22.4752	7.84779	46.6703	15.8081	18.7567	12.6085	5.07051	11.1889	37.7745	18.6312	7.02492	33.436
48.4	5.61574	8.86567	9.02167	7.23576	1.65164	10.0061	32.1728	24.9824	16.2972	47.4645	20.44	14.6603	7.4707	5.02551	12.0081	31.8315	13.1795	7.93642	29.9071
48.5	4.35051	6.66064	12.6617	8.95505	5.52426	3.88404	31.6886	23.7891	2.27335	49.3053	20.3681	14.8909	6.79301	5.6041	11.9361	35.706	14.9686	10.6693	31.658
48.6	-2.19476	4.41735	8.32032	7.57044	6.08032	10.1202	34.3602	22.8477	12.1996	49.6071	20.8044	20.2492	9.3124	3.86581	14.1615	34.4854	16.3646	9.33966	31.545
48.7	2.88397	5.86751	10.2557	7.36759	6.17338	6.10466	33.249	25.4498	15.9086	45.9605	19.8162	23.1609	7.28371	5.18578	13.5602	34.6537	19.5581	9.77738	30.2667
48.8	5.18461	7.65051	10.771	9.35559	6.35105	7.66558	32.472	23.1376	19.3365	46.9857	18.5431	18.4166	13.9509	4.36972	9.04744	29.5513	19.4575	8.86394	30.2075
48.9	4.69481	8.13547	12.5355	8.0177	4.29427	10.4326	33.3993	22.7182	15.1216	49.4994	20.3222	14.0543	12.1842	4.98453	11.5446	35.3266	16.6333	10.8941	29.9503
49	6.16166	8.49834	9.68347	10.0624	8.18853	15.0655	29.5732	21.0096	12.6081	45.291	20.6978	22.5413	7.77182	5.98059	8.65799	32.0247	15.1064	8.69241	24.7815
49.1	8.36189	10.3986	10.8708	10.173	3.37205	9.44971	32.6576	25.4712	-0.21983	47.1339	20.1705	17.2977	9.38336	6.58486	13.8738	35.1932	17.2523	10.4675	27.272
49.2	8.07702	22.0791	7.21429	8.6146	6.31291	6.84137	31.9672	23.0945	6.66722	47.9867	18.4811	18.9727	6.54676	5.24955	12.3096	35.2297	20.1151	10.8308	30.7381
49.3	10.3121	25.6671	10.0565	6.60244	3.18161	8.29497	30.1658	23.1587	-2.28468	44.5301	22.7951	24.6626	9.48895	6.25069	12.0472	33.1615	22.2435	10.5435	28.16
49.4	9.91785	29.0908	8.94423	5.00786	4.03608	13.0771	35.4524	23.6746	9.87831	46.4159	18.6194	19.0837	0.651826	5.62663	13.5843	31.4445	19.4964	10.5791	28.236
49.5	6.45228	36.3831	8.8708	6.59859	2.11522	12.6422	27.7107	23.9434	-1.25535	47.94	19.7052	19.7052	13.4625	3.49918	10.7871	29.339	20.0714	8.8318	27.4813
49.6	9.6696	38.9578	9.66423	6.1176	1.05675	13.6783	33.2239	23.0643	5.1216	48.6807	21.3936	18.9223	8.93851	4.76488	11.652	31.1096	22.4895	10.3941	28.5912
49.7	10.6015	34.8426	11.3367	5.64311	-1.35812	17.7061	28.256	27.4146	7.12963	50.2402	18.2814	24.5815	9.53158	5.96438	8.91466	33.9624	14.4154	8.05445	22.6374
49.8	7.1158	31.186	10.5278	6.51074	3.75341	13.4557	31.5551	22.9686	9.30241	46.1292	19.2469	31.2614	5.19429	5.0693	8.42266	37.0937	19.5159	7.0522	27.5047
49.9	4.59852	30.653	11.7416	4.97788	4.29936	16.9552	29.7713	21.8783	12.5792	48.6343	20.7788	22.1509	6.56868	5.22518	12.0213	26.5953	23.8669	7.94632	30.4177
50	2.38392	28.8112	12.8787	4.66242	3.33292	9.76903	30.4687	22.1206	8.52884	44.7207	16.5974	19.5096	11.3256	4.95038	13.9907	31.7783	17.3113	9.04743	22.3409
50.1	6.64815	27.1099	11.6549	6.11929	3.50656	7.51641	30.2867	19.2885	12.9105	46.1136	18.5203	18.1214	10.0833	4.74138	11.7423	31.4443	20.5638	9.9223	33.5054
50.2	3.2514	21.1194	11.9503	6.04172	1.08302	18.1236	29.009	20.2414	16.4698	46.8291	16.9192	14.1552	10.724	3.59544	13.0256	36.0599	19.6437	10.2626	24.4949
50.3	6.15517	17.3648	11.2434	7.69979	5.74465	19.0678	30.4261	21.7411	24.916	47.1989	17.5062	17.2479	12.4305	6.54478	9.70754	31.3337	22.3122	6.16338	24.3845
50.4	1.59747	17.7801	12.2463	6.88151	2.12731	14.9952	27.7188	22.4308	18.3121	44.6985	19.1675	13.5336	4.57051	5.95549	12.62	36.7556	26.5255	6.74229	22.0285
50.5	5.77012	9.81472	9.30276	5.30257	5.90787	17.5319	28.1928	22.5244	1.46182	46.4474	18.8749	15.4949	4.21071	5.9735	9.58395	33.4342	23.1235	8.60231	22.7644
50.6	6.73889	9.14	13.752	4.30813	4.54803	15.7094	28.8343	20.2541	4.97778	47.5844	17.5194	20.1304	13.9636	5.93158	14.6741	28.7293	24.6199	7.97329	25.8287
50.7	6.82191	2.6192	10.7074	-1.05369	4.30274	11.1009	24.4376	23.2549	11.5464	45.8015	18.5329	17.057	6.37241	5.80659	12.1107	32.1972	28.2047	8.18162	22.8021
50.8	6.39973	-3.13609	11.8891	5.89232	0.606236	13.6821	29.4737	18.8885	4.98661	44.1956	13.8224	22.6346	2.52427	5.92201	10.2823	29.9476	24.2312	7.40427	21.6417
50.9	6.83609	-8.24278	9.70801	1.80547	0.240383	13.6944	28.7738	22.1293	2.76075	43.3148	15.9223	21.411	11.2619	3.33805	11.2422	29.3494	22.6086	9.00237	19.7208
51	5.90588	-13.3222	11.0682	6.8686	1.10693	13.6182	25.3548	23.7251	0.066664	43.725	14.8755	18.7535	8.42244	5.41877	10.2559	34.2314	24.9874	2.2759	20.1207
51.1	5.59815	-15.2973	13.3164	4.90465	4.60484	12.9817	27.9632	22.2579	1.31686	46.0934	10.8984	18.2023	7.74083	5.60533	12.6766	31.9349	25.5268	6.74116	22.8868
51.2	5.602	-22.2864	10.5083	-0.22802	2.12042	6.81841	29.383	20.3426	0.493317	43.6157	11.8178	20.5199	10.808	6.79732	10.4607	26.9689	25.6506	8.34503	23.2969
51.3	3.78533	-26.635	14.9347	4.91136	2.71386	9.40603	26.9245	21.583	-7.60075	47.384	15.064	20.3787	2.59511	7.18377	10.5543	33.6334	30.4582	4.37406	26.389
51.4	4.42229	-25.7187	9.80446	3.01344	5.02435	10.1916	28.0044	26.4341	-14.3853	44.0825	12.8767	21.7332	6.02781	7.11295	10.9903	29.8825	31.0805	6.21657	27.9593
51.5	2.6805	-28.1111	12.2766	2.90085	3.57561	5.63646	28.663	17.6695	1.66544	43.3751	12.227	18.7625	2.1163	5.97314	11.3765	32.5134	16.1017	7.60995	14.2842
51.6	4.59416	-32.3407	11.7278	5.13442	2.30613	4.17629	26.0954	24.1501	-2.30134	47.2337	13.263	20.0938	3.76039	6.37358	10.6735	30.025	22.499	7.26387	26.0103
51.7	1.36044	-36.5603	9.30465	3.88818	0.41077	6.7587	25.6264	23.28	2.91787	48.1861	12.5683	20.549	8.39542	7.54041	10.8268	30.7601	26.8606	6.86906	16.9863
51.8	4.90584	-39.2784	9.07973	2.325	0.090374	9.19518	23.9177	23.5714	5.09993	43.2745	11.1309	14.8054	8.70695	7.59399	8.45717	27.8007	19.779	7.77547	14.561
51.9	2.52641	-35.0173	6.93842	4.80174	3.0111	8.98611	23.634	20.235	2.71458	47.3218	7.9364	21.576	6.81617	7.99839	11.6724	34.9879	27.3549	7.37155	22.5503
52	6.18982	-39.575	10.1639	5.25264	2.17112	4.88311	25.0398	25.1877	3.10834	46.0089	12.6308	16.9255	9.39285	7.48623	8.40273	24.4012	22.7187	5.0028	29.4855
52.1	1.42236	-44.3542	9.18973	4.09246	2.89966	17.096	23.8588	23.6737	0.356958	43.1271	16.4021	18.8531	1.57087	6.83465	9.46029	31.7486	22.1129	9.09243	34.5989
52.2	4.54984	-44.4839	9.9361	1.82521	0.408696	12.9343	23.0842	23.3597	-1.36674	44.7992	15.656	18.8366	4.98158	7.44009	7.6184	27.8766	20.7761	6.91527	16.6054
52.3	4.42235	-51.4677	8.59491	3.40452	-0.21434	16.6314	22.2428	26.7905	4.74548	44.0771	17.816	18.4101	4.0801	7.42718	10.1803	27.6304	19.8602	6.59643	18.7814
52.4	2.57409	-51.6436	10.3741	2.11184	1.59812	14.0572	22.2777	22.883	1.17298	44.6049	13.3869	16.5743	7.40418	7.53706	11.1469	33.2511	22.4905	9.12035	23.6292
52.5	2.63919	-52.0426	10.9259	3.59292	3.92198	7.68191	20.8693	20.2254	7.0666	44.1705	10.4919	24.0677	3.7921	7.5604	9.5976	29.9907	19.1292	9.46907	16.5774
52.6	3.66006	-50.7395	10.0854	4.96818	2.81669	4.99287	20.4794	21.3899	3.80663	44.9951	9.18867	19.5052	11.266	6.62703	11.2136	31.5538	16.789	5.61819	21.3434
52.7	5.45234	-56.5535	6.82065	4.8236	3.82908	11.3928	19.7006	22.4316	1.79136	43.2737	17.7883	21.7453	2.26797	7.28885	7.99093	33.4471	15.0051	6.15192	26.4099
52.8	3.09129	-58.1227	10.6044	3.20478	4.58174	8.17662	22.4758	20.867	-4.60905	44.4108	17.2945	17.173	6.10009	6.0289	7.04231	31.8107	21.0005	8.18662	29.6232
52.9	2.94067	-55.057	8.26251	2.54139	6.61736	10.4605	24.2419	21.3502	1.05249	45.0201	15.6303	17.8857	3.80792	6.60033	10.7033	30.8159	18.2125	6.65819	25.1143
53	6.5749	-55.6236	8.60887	1.7843	3.49087	8.89814	19.046	21.8122	-0.00453	43.6866	17.1004	20.8891	4.55476	7.39902	8.28626	30.3108	24.7788	5.5016	21.6073
53.1	2.99841	-61.3362	9.27648	2.48951	1.58456	16.3156	17.9601	18.5504	-4.58966	42.2901	18.151	24.48	7.85008	7.51096	9.97452	33.2068	20.1317	7.69262	32.9826
53.2	1.26206	-62.0262	8.56455	6.35449	5.47738	18.1134	19.0965	19.6305	0.343325	44.5889	15.2984	17.7938	8.79041	6.66936	10.9221	30.1466	18.4308	9.85584	35.5624
53.3	5.81996	-62.4165	8.65158	5.34361	2.67288	15.0055	19.0045	14.8588	-3.46882	45.9196	16.3325	19.9276	8.03889	8.37244	8.84827	24.3715	22.2233	6.04325	24.1535
53.4	5.13621	-63.7946	10.5303	9.66097	1.63142	10.963	16.652	21.3275	-1.99395	41.3706	18.084	19.4291	11.1602	7.57063	9.024	35.4275	13.5223	2.14267	16.268
53.5	3.84487	-62.1555	11.5791	8.27697	1.68945	11.2788	18.6336	17.7297	-14.3931	41.9521	16.9711	17.5992	8.04164	5.77313	10.0159	33.2241	15.4273	4.10007	19.3194
53.6	4.47004	-60.833	11.1922	9.92485	3.16915	13.9909	18.1627	22.7222	-5.81369	41.5452	15.6681	18.0034	7.57641	7.36772	11.8002	29.0119	14.7794	6.14848	28.3459
53.7	5.24713	-65.2966	8.16796	9.67059	3.7482	12.2314	20.6288	17.3591	-2.24934	40.0846	10.1683	20.4387	7.7833	6.65801	9.9543	27.0351	16.4719	3.10895	25.0525
53.8	4.24445	-63.2681	7.76582	9.26517	4.81561	13.0078	23.9278	16.6667	-3.29258	44.273	13.4503	19.9145	8.3577	5.90192	9.76051	22.4032	10.6771	6.33516	23.5779
53.9	1.63021	-61.0358	9.29219	9.64559	3.66432	14.0121	21.1365	18.3837	-3.29112	42.3632	10.2778	21.6219	5.49259	6.62338	11.1931	23.6294	12.3704	5.62523	24.6041
54	2.62863	-64.0226	7.56091	8.864	3.40048	12.3738	23.0232	17.8037	-4.94761	42.5075	16.7459	25.4377	6.61718	5.84807	14.6659	29.0543	17.4375	3.37802	24.6394
54.1	2.43632	-67.1125	9.78835	10.1271	1.68529	12.0307	24.0284	16.0858	-1.69934	41.2713	12.6382	22.772	8.81572	7.23237	12.3994	34.6824	13.6782	5.11755	23.7799
54.2	3.42585	-66.8522	11.4759	9.19915	4.36041	14.8956	20.8339	17.5233	-12.2289	44.858	13.9071	20.8265	4.19815	5.08777	11.4244	24.7906	16.268	8.02137	21.4493
54.3	3.47193	-68.7587	10.3424	9.09333	3.93202	14.9332	23.3566	23.1764	-6.78572	45.5831	14.5235	22.4492	3.15399	6.4468	9.38205	24.1199	15.3765	4.99626	21.5101
54.4	2.9558	-70.8989	11.4778	10.3047	2.92332	16.5051	23.1669	19.6399	-3.54535	46.2762	15.5495	15.0212	4.48616	5.84097	8.51784	24.4445	16.0934	3.18629	17.9258
54.5	2.77342	-69.9484	8.6959	12.0963	3.00418	11.5485	16.7387	15.1359	-4.71113	45.5573	13.2717	15.5494	5.13211	6.87486	9.4694	25.6057	6.37802	5.48232	26.3253
54.6	4.07463	-69.5571	8.5652	11.1458	1.35521	8.19962	16.7194	19.6296	-5.32115	44.0378	10.3966	18.2503	3.99057	7.14282	10.8221	23.3741	13.2613	5.75154	14.256
54.7	-0.7553	-75.8843	11.1202	12.0273	0.815558	9.96775	20.0569	13.7518	-7.27212	43.2547	16.0158	17.5974	-0.90978	5.75344	11.0243	24.5838	9.94212	5.2393	15.2518
54.8	3.06241	-70.377	11.3458	13.7652	0.477309	9.90782	18.3302	17.7009	-9.72277	41.4064	10.0835	23.2009	4.41064	6.01706	12.496	29.2886	18.9025	2.92109	22.7616
54.9	0.502988	-70.2924	8.17582	11.1954	-1.5065	14.7612	18.7218	18.7464	-15.3684	41.4346	15.825	19.5918	2.32566	5.64637	9.33214	27.9811	10.332	1.04459	17.5309
55	0.117952	-70.4051	8.00999	13.1814	3.82441	13.6157	14.5564	15.732	-10.1984	42.1128	15.0812	21.814	-0.47608	6.81566	10.8339	23.5371	13.6421	3.33888	17.1665
55.1	1.40109	-75.8558	9.46557	14.1135	2.58332	19.3392	18.3234	16.7935	-17.3175	41.9361	14.9688	15.6579	2.3269	6.49495	11.2573	27.4785	14.5452	3.08321	19.9584
55.2	-3.05988	-75.7188	7.56299	8.61405	5.07925	12.9619	17.2324	13.8648	-12.9297	39.7143	10.7134	17.3586	2.39624	4.31761	13.5839	23.91	16.5491	2.84939	28.1102
55.3	-1.18289	-74.9083	5.31149	8.46048	3.83014	18.652	16.5594	13.5814	-11.9694	38.8353	9.16857	16.5346	-0.10568	6.60999	14.5576	28.7233	14.7492	3.88257	14.3845
55.4	-3.19863	-77.3187	5.44482	5.66736	1.92461	13.2035	18.7086	14.8865	-17.6782	41.3397	13.8111	18.3485	4.16717	6.12889	12.7833	31.8899	14.3875	3.99848	16.2137
55.5	1.77607	-79.825	10.8916	3.77271	4.11728	13.1085	16.5764	17.1779	-20.2772	40.1293	13.0189	19.06	14.4761	7.29059	13.3308	26.1217	12.1624	3.14958	13.4533
55.6	-0.71534	-79.8558	8.88438	3.55482	2.42629	11.5127	19.7052	15.0952	-14.8734	43.0017	12.9925	21.5148	0.917973	4.85914	12.6302	30.6532	15.8042	3.64785	17.4972
55.7	-0.84333	-77.1978	8.79325	5.5139	3.20293	9.72235	22.0429	13.2835	-11.3173	39.5698	14.0042	21.4088	8.54878	4.95431	8.10122	29.4565	8.36526	4.21486	12.47
55.8	-0.70007	-80.0875	8.42074	8.10867	4.51763	12.6269	18.1648	14.1835	-19.172	40.3138	13.2245	17.2923	7.89373	5.86179	13.4415	20.3938	9.73537	0.876521	11.8114
55.9	-4.74434	-79.1503	9.90195	9.92979	3.773	14.7844	17.3072	15.5887	-9.94089	39.4607	13.4763	17.6099	6.79544	5.82782	14.4009	27.9368	14.6773	0.671274	17.6034
56	0.727152	-80.0744	9.71033	9.37965	5.09223	10.0898	23.9596	13.754	-12.9831	39.4913	13.4927	18.4591	9.56545	4.82909	15.7737	29.9403	15.3355	-0.19361	16.9331
56.1	-2.5414	-81.5631	12.5441	11.5401	4.73825	5.24741	18.7342	16.1369	-11.5178	38.7555	13.6683	18.1571	10.4687	4.79675	15.867	22.788	13.7228	0.833746	16.0807
56.2	1.08028	-80.7888	7.32772	11.8324	2.2617	-0.20225	19.0708	14.2915	-14.17	41.5638	14.7906	12.4662	3.03669	5.36632	10.4906	24.017	10.1721	-0.51857	17.099
56.3	0.469482	-80.3515	9.74578	10.7254	3.58159	9.47814	21.0414	11.9891	-11.7676	43.1804	13.4835	16.2508	9.49163	6.463	16.7735	33.4539	9.00076	1.49903	25.5156
56.4	-0.29435	-82.0672	10.5563	11.9507	2.49138	12.793	17.9344	11.6067	-21.096	42.0054	12.1498	18.4511	9.3688	4.84933	13.1312	24.6903	13.152	0.327091	20.7781
56.5	0.355169	-79.5445	10.4792	9.60727	1.97996	10.0157	14.9586	14.6884	-16.377	42.302	9.50428	19.0969	3.92734	5.86031	15.4246	23.0791	7.50278	-1.51038	25.2263
56.6	-1.95445	-78.7362	9.67025	8.00188	4.01705	4.9833	22.2917	14.4356	-12.367	39.3864	13.6059	18.6993	4.85626	6.3848	16.3	26.4492	10.6257	-0.0486	14.7376
56.7	2.75116	-85.4812	9.28984	11.0306	2.59525	7.14053	23.4859	14.9106	-5.10822	37.7371	16.1211	13.2792	-0.7401	5.97471	16.6577	24.2498	19.4933	-1.31536	17.7333
56.8	-2.66898	-78.7321	6.37781	9.86184	1.40558	11.9424	20.5504	8.34266	-4.55117	41.3282	14.1481	17.8683	4.40566	6.50555	17.0366	27.1855	7.39193	-1.8255	15.9731
56.9	-0.48426	-84.0784	8.26371	9.20447	1.59405	21.0865	15.128	12.2992	-13.5308	40.394	13.5869	18.4778	8.61484	5.05498	17.5131	22.5549	11.278	-0.50126	22.8517
57	-1.58102	-83.3345	7.11943	6.53574	3.98321	11.9148	19.9422	14.6545	-4.10432	38.4366	10.7691	19.9403	6.39882	4.37182	16.2533	28.8252	13.0805	3.51421	19.2734
57.1	-0.92055	-82.6062	9.04513	10.9339	2.68233	9.41852	19.0454	11.6907	-7.54987	39.3093	10.9899	13.2225	-1.8693	6.71891	14.3149	25.2839	15.2748	0.955295	14.9039
57.2	-0.71183	-81.1168	13.3717	11.1673	1.78809	9.97631	21.1191	13.0771	-9.2138	37.2519	11.2141	13.7914	8.12525	6.58227	14.7092	24.6806	12.0979	2.18246	20.7588
57.3	-4.79207	-82.8648	9.2729	11.7459	4.01571	6.94429	16.1464	12.5577	-21.3376	36.1475	13.7594	16.1047	5.22883	6.1292	18.4941	28.7181	6.24285	2.56071	18.6226
57.4	-1.18498	-79.8332	10.0476	11.5218	2.84349	7.83405	18.6963	9.44066	-16.141	39.6185	13.3628	18.1666	10.9791	6.19573	17.2886	26.2058	13.2748	3.47212	11.7975
57.5	-1.60445	-79.7719	11.3734	9.65819	2.89107	15.8064	17.0395	5.88137	-18.8876	36.1576	14.4079	15.3847	9.18025	4.33415	16.8216	21.8855	15.7201	2.924	15.2695
57.6	2.89156	-85.2383	12.3335	11.6969	0.731124	3.28866	19.8752	9.37576	-15.2951	39.7085	13.2556	17.0926	4.4793	4.65521	16.7452	31.5671	18.7385	0.1136	17.1719
57.7	3.28155	-84.7453	13.0713	10.7964	-1.03401	7.46095	15.4982	13.0625	-11.8085	40.9952	11.6231	20.4742	-3.09786	5.25124	15.6794	21.7215	15.4566	-1.36414	23.4515
57.8	-3.42016	-84.1727	9.86412	7.43303	2.59589	6.50563	18.1809	13.1284	-14.3186	40.0805	13.4062	17.528	3.62637	2.76252	17.9034	21.9826	12.434	0.36312	17.0772
57.9	-1.68861	-82.2833	11.7066	7.79394	4.07904	5.95251	19.8108	12.8596	-8.77241	36.8704	9.28716	21.5708	5.53944	2.76398	16.2565	27.5726	10.493	2.71542	10.5756
58	-4.07138	-85.1528	12.4746	10.2978	2.10472	5.55121	15.6642	9.87275	-3.10747	39.1303	8.04879	17.0909	6.18899	4.08245	16.7703	27.4883	8.22268	1.15456	24.9314
58.1	-3.1886	-83.5346	10.6622	8.94588	2.79708	3.09087	16.133	7.16497	-12.4332	36.9819	13.7627	18.3051	9.91951	4.58843	15.5505	21.2249	11.624	5.34671	16.0597
58.2	-5.25586	-82.311	9.06294	7.47942	-0.94337	0.754677	16.3033	13.4829	-10.6078	40.5333	11.5726	17.9288	5.7909	4.17863	16.2168	26.5674	15.4147	0.360643	11.2327
58.3	-7.43572	-79.8545	10.6229	11.2327	1.90255	4.49203	17.8477	16.4645	-1.84693	39.2607	13.3429	18.5535	5.56804	4.38162	16.8073	24.5905	14.0602	2.18624	13.1758
58.4	-1.38223	-77.59	7.31871	9.97801	1.41722	13.7321	19.8529	12.0056	3.08567	40.2421	13.1742	15.5601	-3.77533	5.14982	19.3186	17.7809	18.4836	0.642104	11.347
58.5	-8.13679	-81.5251	10.5118	9.01236	0.395512	11.4355	14.2145	12.4524	-6.56269	43.6999	14.182	12.8087	4.9643	5.42669	14.2888	21.2738	7.35451	1.32184	15.3439
58.6	-1.62519	-81.3178	10.21	5.94061	-0.52703	16.463	20.0878	13.9729	-7.33638	37.8274	7.3258	20.0089	6.85005	3.11973	17.7688	28.7441	10.6149	-0.18862	18.4315
58.7	-2.49305	-84.4624	10.1018	8.85338	2.63541	2.14807	17.9562	12.269	-6.80062	40.2978	7.29348	17.2997	7.92595	4.4008	16.2455	33.181	11.3305	-0.36966	17.0233
58.8	-3.01963	-83.7399	10.9189	7.22092	0.236666	7.76641	17.4056	8.11924	-4.04364	36.3545	12.3282	15.9003	15.7177	4.75057	18.7349	24.9527	14.4095	1.0265	26.7051
58.9	-7.97068	-84.9419	9.36417	7.83856	1.4201	7.85133	16.3591	13.4628	-1.28846	38.1868	8.45091	17.559	4.63689	2.93276	13.7164	30.3879	7.43297	1.63646	18.5342
59	-5.16998	-82.9061	8.23964	10.1767	2.41116	3.71653	15.923	10.4865	2.50125	40.1971	11.4779	15.173	8.62892	3.32127	14.2561	28.9323	4.41907	3.49144	13.8491
59.1	-4.32405	-83.3738	8.7981	8.24328	1.77658	3.29422	17.3923	7.51542	-10.4967	36.6444	10.9787	12.8181	2.2249	4.23145	16.2486	28.5462	13.886	3.45924	18.1654
59.2	-4.70648	-83.3394	7.2007	8.66024	-1.80585	6.06123	16.3523	10.8359	-4.70962	38.1238	5.00801	18.8429	8.12352	3.77166	16.2903	23.492	11.928	-1.04622	15.9914
59.3	-7.31709	-84.9686	6.98022	5.64185	-0.07766	9.37841	18.7157	16.7342	-1.64273	36.8555	4.03736	12.8166	6.27057	4.07676	19.8228	32.5886	7.45151	0.517808	18.6863
59.4	-8.86662	-85.3095	6.27595	7.12298	0.175186	12.2111	22.411	8.88292	-3.50052	37.7327	4.35023	14.6739	6.28913	4.45195	17.7518	27.9139	15.965	3.33789	11.4386
59.5	-4.12759	-84.096	5.54225	9.71274	3.26688	4.98929	15.8942	12.2947	-6.44596	35.6667	3.93558	12.0908	11.3628	3.80909	13.2125	28.2293	10.1723	0.838609	17.4743
59.6	-7.69613	-84.0358	4.09139	7.35489	0.093241	11.2943	17.0724	12.4791	-7.70308	36.135	7.98434	15.8087	3.00011	2.93219	16.2403	24.7126	8.49182	2.69442	17.8484
59.7	-9.8687	-82.8995	5.44458	4.63446	-0.64905	7.77326	15.3543	11.1949	-13.0356	36.143	10.0009	15.2101	4.23647	4.53702	16.6723	20.3674	8.7568	-0.3017	20.802
59.8	-2.56323	-82.6556	7.5355	6.68287	0.29965	-0.48804	21.8134	11.9341	-5.73962	37.063	9.91082	13.83	7.12081	4.71254	11.8779	26.9477	8.35448	-0.30073	14.7129

## Sheet: Figure 5E
Time (min)	Current (pA)
-2	-2.86879	-11.6317	-20.8696	13.4687	9.48826	3.93148	14.8609	-19.82	-7.74226	14.6495	12.4615	0.739734
-1.91667	-8.72887	-8.68731	-17.1577	14.1565	5.36506	5.15688	13.5393	-15.318	-4.53724	6.72664	8.73265	1.9738
-1.83333	-9.16835	-8.96001	-1.68664	3.64196	6.2877	4.33785	14.5693	-18.5905	-6.50325	3.34325	6.8228	0.899081
-1.75	-13.2204	-8.62505	6.95324	0.906121	0.265573	5.14352	8.67055	-23.8431	-2.48834	1.544	4.43699	1.74375
-1.66667	-19.0167	-4.81774	5.14711	2.43104	-0.66134	9.70138	6.76198	-23.9433	-3.99069	1.09572	4.01698	0.663974
-1.58333	-19.3792	2.84046	-5.38425	2.19265	-3.27959	8.08676	2.40804	-18.1569	1.68221	0.986653	1.25193	-1.557
-1.5	-10.1341	10.3239	-8.42515	2.57153	-2.83663	5.84896	4.46242	-4.38204	2.03124	0.401692	-0.12002	1.1899
-1.41667	-11.0803	11.6716	-9.90582	-7.21979	-2.86703	4.57339	2.12435	-1.35146	4.64205	0.133931	-1.48601	2.24149
-1.33333	-8.84166	11.967	-9.27535	-3.8791	-3.50283	9.19226	2.13552	-0.3854	6.68612	1.36757	-2.02605	-0.82443
-1.25	-8.6288	6.04298	-1.10412	-8.01873	-7.32625	12.1493	5.50823	-0.39629	6.87558	0.088246	2.15608	-1.55044
-1.16667	-8.55529	5.57185	2.04431	-1.56219	-9.39513	11.6555	4.96312	3.07041	3.32996	2.12175	3.85505	-1.72966
-1.08333	-8.93654	4.18757	2.92168	3.32693	-1.85665	10.5252	0.363817	2.59284	5.50878	-2.47419	3.72514	-2.61261
-1	-10.9173	3.41492	3.98707	2.5304	1.44779	9.90237	-1.15187	1.8718	4.72284	-3.02958	5.4575	2.33771
-0.916667	-11.805	3.73121	2.04045	1.65754	-0.07592	7.66934	-5.04024	6.26356	6.2318	0.250294	4.73555	0.61098
-0.833333	-8.59828	11.9164	5.09541	1.29983	-0.27496	5.38793	-3.13606	4.72477	3.73992	7.07079	3.8776	-2.69154
-0.75	-6.39052	2.75819	6.73891	-1.46491	-1.41448	2.62554	-8.395	11.2933	3.29538	6.91842	3.18058	-0.53177
-0.666667	-8.54656	5.22266	6.3668	-0.78645	-5.92043	-3.71897	-7.91948	11.937	3.17232	3.87194	3.64003	-0.23311
-0.583333	-4.4229	7.52888	6.70842	0.359734	-7.49337	-5.55762	-8.25072	12.2221	1.98287	4.54094	4.67585	-0.28926
-0.5	-3.64852	3.56928	6.67766	-7.72097	-2.58938	-9.10337	-3.19819	9.69108	-0.11924	0.124287	2.0558	0.331104
-0.416667	-3.47054	-2.92736	10.7455	-8.49155	1.97517	-8.55189	-5.85203	13.265	-0.45265	-0.78199	-8.04183	-1.2864
-0.333333	-4.12343	-6.96484	-1.59075	-4.27682	-3.62148	-7.64518	-8.02159	16.7298	0.554493	-0.26771	-8.74968	-1.78233
-0.25	-2.12743	-6.04046	-1.93817	-2.95373	2.29145	-9.68165	-7.18522	14.0868	-0.85977	-4.12574	-10.4679	-0.36603
-0.166667	32.5034	-7.53307	-1.33267	-5.51691	5.66999	-7.55945	-10.2184	17.6615	-11.3063	-1.8151	-13.3012	1.58339
-0.0833333	46.7286	-10.0266	4.02777	1.03068	6.74265	-9.59864	-5.75664	17.467	-9.33664	-9.81498	-15.5574	2.36562
-8.00005e-12	50.892	-9.78594	9.21593	2.31753	13.5818	-8.47059	-6.24208	19.2386	-4.37393	-8.77378	-15.332	-0.1777
0.0833333	59.6166	-9.45861	15.7714	10.8788	15.7946	-16.1405	-7.90874	21.7952	-2.29222	-9.50303	-13.9213	-0.30853
0.166667	62.9499	-9.8316	18.7098	9.15859	18.4873	-20.7714	-11.4795	26.5806	-1.73129	-8.06935	-27.0996	-3.18338
0.25	66.757	-4.69201	19.9214	11.8826	17.9266	-26.7821	-6.59505	29.3923	-1.23278	-6.75389	-23.9825	-3.52301
0.333333	71.2498	-0.89715	18.832	11.8346	23.4173	-31.9516	-5.97999	31.2871	1.90754	-8.35395	-25.2012	-1.55287
0.416667	76.5876	-6.38329	32.0071	6.50822	19.9197	-34.4812	-7.29869	35.9186	11.8234	-9.2715	-25.4918	0.958087
0.5	77.2341	-4.35943	47.3647	6.19408	17.3682	-11.6975	-9.25035	57.9727	14.865	-7.34574	8.02555	5.86679
0.583333	77.8952	-5.2102	55.1096	25.3474	11.2689	9.92809	-8.23536	123.005	17.185	-11.6868	50.9067	27.6343
0.666667	82.5469	9.81715	62.9281	45.0401	6.38181	16.1679	-10.7434	170.218	19.3955	-10.8238	70.0174	40.8637
0.75	79.0138	35.2152	64.0165	57.7183	3.96507	41.6145	-0.56441	194.216	22.9635	-8.93946	59.6137	46.2438
0.833333	84.7432	50.0547	70.9801	60.8386	4.43415	57.8708	18.2914	201.045	26.5115	-9.26869	51.313	51.1335
0.916667	101.843	56.9735	68.2247	60.159	2.48371	69.0164	28.9075	201.695	33.323	-6.95021	46.7078	52.7807
1	106.541	59.3303	62.9079	58.5672	1.25956	66.0473	35.3726	198.74	41.7756	-1.59266	43.4599	48.9022
1.08333	107.66	60.8488	59.4383	60.3731	22.7615	64.0173	39.2375	193.943	48.0722	3.20919	36.67	46.6732
1.16667	110.912	58.0139	49.4539	57.0599	50.9072	52.9448	40.149	188.751	51.2374	13.1382	29.7108	43.3385
1.25	127.383	58.5313	56.7557	47.1571	74.4681	34.7075	43.3772	179.896	53.4765	28.7399	27.3734	42.7819
1.33333	150.304	59.2075	59.1257	39.4993	92.6685	20.2784	48.972	174.125	55.1077	40.3985	21.2396	42.2154
1.41667	183.41	54.3979	55.8618	33.6864	108.014	5.07479	55.6462	168.622	47.6131	49.23	20.2946	37.7823
1.5	209.627	52.8174	55.1521	33.8539	116.42	-3.54041	59.5097	170.15	43.3604	56.492	15.6715	31.2157
1.58333	231.812	51.0676	48.7574	39.1209	124.71	-15.4904	63.9312	169.355	45.3528	61.5029	11.9289	28.6033
1.66667	250.317	48.275	42.0122	35.7783	122.276	-18.8033	66.7002	168.316	40.0245	63.7015	7.21272	29.1634
1.75	265.267	38.6673	45.451	42.8668	118.313	-19.6655	69.7704	169.732	37.9764	65.6141	4.28047	30.9779
1.83333	273.496	40.249	46.2464	30.5232	112.213	-23.4365	73.8823	165.443	41.6599	68.1902	0.421276	28.8155
1.91667	283.215	31.767	31.5302	18.7648	105.623	-24.4501	72.0374	160.895	41.3077	67.641	-1.79918	28.3016
2	288.95	23.4686	24.4383	12.6549	102.374	-22.8934	72.7609	155.72	37.874	66.7643	-6.86809	28.4374
2.08333	298.118	19.4694	22.7977	16.5415	102.866	-24.3277	71.6392	150.591	38.3988	63.39	-8.52651	27.1507
2.16667	307.227	14.0907	26.2938	10.4451	97.462	-22.8933	73.3119	146.775	38.6768	61.6329	-11.2322	26.48
2.25	308.946	3.84846	22.9649	8.64448	92.4409	-22.4878	62.467	137.946	38.9607	59.6297	-11.0434	25.5579
2.33333	301.745	1.99061	29.6462	10.7364	89.8099	-25.2642	59.4961	130.097	39.2713	59.5455	-12.2927	25.8296
2.41667	302.721	-2.87151	30.3474	5.39837	84.4568	-24.2251	60.4336	124.783	36.5995	55.3776	-12.9848	24.0578
2.5	301.212	-6.69469	31.4325	2.75918	80.3165	-19.7437	57.9355	120.697	35.236	52.2016	-17.7747	22.2777
2.58333	304.428	-6.53539	38.9251	4.12098	76.1128	-12.4901	60.9528	125.206	33.7092	51.8891	-19.5226	22.3243
2.66667	307.03	-7.52148	37.8995	-0.39629	76.8062	-6.44761	60.6383	119.916	32.4636	50.8708	-21.5772	23.0711
2.75	305.669	-13.6221	40.2031	5.6601	71.9882	-9.94803	64.9072	120.578	32.1171	50.8098	-22.0015	18.7655
2.83333	305.908	-16.595	45.9206	-1.11073	65.342	-9.25907	66.2361	117.286	30.4762	49.1795	-23.9459	17.4421
2.91667	301.782	-21.757	39.343	-2.84716	66.6285	-7.26035	65.474	118.413	30.5569	32.4702	-24.2342	16.8971
3	299.724	-21.7172	33.3714	-6.7439	70.518	-12.5765	63.167	112.703	30.3074	38.0146	-26.9871	15.7967
3.08333	297.814	-24.6628	26.901	-10.1364	70.501	-16.1629	58.6729	109.552	28.9776	40.2845	-29.0586	16.0517
3.16667	296.362	-24.9674	29.226	-9.22886	69.3973	-12.1934	60.8616	108.016	27.4646	40.8589	-28.7068	15.577
3.25	297.369	-25.0292	24.1582	-21.0837	63.6464	-11.1113	57.3382	101.168	28.066	39.8488	-26.3883	15.3202
3.33333	297.028	-26.2335	16.7758	-25.1242	67.3349	-12.7057	56.6107	108.604	28.0668	41.1131	-30.2773	12.0986
3.41667	302.639	-28.8398	6.08016	-32.5113	69.4907	-19.8665	56.2573	107.177	25.7546	39.331	-31.9742	13.1632
3.5	305.74	-26.2134	2.51005	-34.2362	68.718	-18.5161	61.7026	103.047	25.0277	39.1738	-31.4535	11.2447
3.58333	302.083	-23.5298	10.929	-34.4088	64.7072	-36.6703	67.0633	98.3616	23.5421	39.7444	-32.7954	11.2263
3.66667	299.574	-21.9399	17.8826	-28.7936	61.7073	-31.4154	71.4359	95.4055	23.2622	40.1372	-38.1251	11.2335
3.75	299.332	-29.2483	18.1884	-20.7183	60.204	-29.4913	68.6206	96.5594	24.9156	40.6757	-43.468	11.597
3.83333	296.877	-26.7272	16.5262	-18.4742	58.4723	-32.8085	75.2288	98.0368	23.1224	39.6615	-44.477	12.0744
3.91667	294.341	-27.4543	19.4199	-18.9559	55.0607	-31.3716	81.7807	95.312	18.9981	41.0525	-47.0384	11.9756
4	293.215	-31.7056	23.6599	-12.0856	49.8599	-25.8058	79.9388	95.8072	18.588	41.1853	-68.5752	7.84021
4.08333	293.369	-42.5515	25.2976	-13.5165	44.3434	-24.8504	76.3013	88.9364	18.4318	38.6143	-65.7265	7.74066
4.16667	293.76	-60.9417	27.1604	-9.01975	44.8182	-25.7331	82.2785	82.1423	16.7672	38.2155	-83.5495	7.9749
4.25	288.998	-59.6606	20.7535	-20.9216	41.2841	-24.5781	84.4476	81.9057	15.9827	39.6778	-94.9208	5.09615
4.33333	282.439	-60.4902	31.004	-15.2716	36.8089	-24.5723	89.4557	76.6464	16.506	38.8561	-96.7464	7.23751
4.41667	284.093	-65.9107	34.7177	-13.4529	34.1475	-23.1196	89.3638	79.5225	15.774	37.9927	-95.9337	5.40367
4.5	283.923	-76.2645	44.4174	-21.4914	32.9345	-23.3191	90.3271	78.8946	16.2159	38.9771	-96.3234	2.83663
4.58333	284.88	-79.6873	48.8286	-23.6143	31.3143	-25.0814	92.2034	79.7605	17.346	36.7323	-97.0952	3.03098
4.66667	285.305	-81.8083	49.5874	-32.4334	31.8289	-24.0248	93.2424	79.9846		39.5977	-97.1984	3.00273
4.75	148.43	-85.8503	43.005	-26.8667	31.1606	-18.3639	100.273	75.9136		40.1498	-99.5805
4.83333	123.869	-87.8097	40.0771		33.8919	-15.1506	100.848	69.9195		38.6634
4.91667	106.058	-90.1298	40.4429		34.1664	-15.5917	101.357	71.0704
5	97.5929	-91.5215	39.5424		33.4904	-15.3824	90.3225	62.9461
5.08333	87.1055	-92.0107	40.7262		34.2826	-16.31	96.4869	55.9287
5.16667	83.7387	-91.1003	27.5494		31.4674	-18.4688	99.3466	53.9061
5.25	78.3052	-94.0205	19.2171		32.2539	-19.6976	104.243	48.7492
5.33333	72.0648	-91.3551	20.9945		31.8648	-22.3866	108.568	43.4994
5.41667	69.3481	-93.2329	23.8634		33.8664	-24.5856	107.408	43.7566
5.5	67.4487	-98.7315	31.3519		34.1123	-22.9692	106.1	40.7625
5.58333	64.1128	-95.4208	36.5063		35.9426	-24.9687	101.472	36.1677
5.66667	59.3247	-96.4331	37.9736		40.194	-23.6382	106.633	34.4361
5.75	56.1226	-96.8162	42.4642		42.6846	-25.5335	111.574	34.2874
5.83333	51.2424	-96.0875	45.3635		48.8644	-25.7254	110.777	30.3861
5.91667	50.2962	-93.3487	45.7002		49.9652	-24.0654	106.785	29.8583
6	40.892	-95.8424	43.9549		48.5313	-22.9021	105.616	27.834

## Sheet: Figure 5F
Time (s)	in Delt II								in TIPP-Psi
0	-2.55606	-1.61514	-0.33664	-12.0423	9.36577	3.97416	-0.79705	1.75833	3.50842	4.43497	0.216611	-5.80243	-0.36097	3.92103	0.793373	-5.93955	-1.12238	-10.1148	-1.70262
0.1	3.28318	-0.48114	-3.13993	0.763064	9.50181	-0.66453	0.559935	2.76477	-0.40483	8.07899	-0.25675	-0.68007	2.10557	3.75464	-4.65516	3.28568	0.116782	-4.88671	-3.51838
0.2	-0.42875	-1.38676	1.10824	0.526714	6.06661	3.1266	0.085342	-2.15401	2.65134	4.85395	5.67493	-6.18377	2.14712	2.71272	-3.31378	0.281295	2.09705	-6.63634	-1.26528
0.3	-0.47612	-1.04549	-0.04246	-3.1571	-0.15274	-1.91386	1.26329	-0.86386	1.65479	4.63739	-2.93445	2.92453	3.89787	0.049167	-1.80221	4.04094	2.76439	-3.89499	-3.28122
0.4	1.738	-1.09179	-2.17875	-10.9557	4.16342	-0.90623	2.69903	-0.05799	-1.2654	5.70742	0.592088	-1.46903	-3.65741	0.097867	-0.66413	2.68711	0.655424	-5.01825	-1.60793
0.5	1.08883	-1.26921	0.309948	-11.5468	0.429595	0.1825	2.34115	-0.45152	3.86281	0.489972	-1.63296	0.961154	-4.63657	-1.06069	-3.31339	4.99477	-4.46988	-5.61496	4.37222
0.6	0.184007	-1.76505	0.36097	-15.6877	3.80342	2.90631	2.59622	-0.64739	-0.59638	11.3173	0.247759	5.93742	2.07541	0.467282	-7.47531	-1.84019	4.42078	-6.29186	0.636194
0.7	0.755928	1.36997	0.828781	-3.50055	-0.55558	0.806155	1.41928	3.707	1.33234	6.20316	-0.43486	0.816161	-1.81153	0.61158	-6.80401	0.303139	1.49706	3.12784	-3.62832
0.8	0.950235	-0.78791	-0.73092	-11.3302	3.60415	-0.33243	0.870697	-1.49695	1.2334	4.7438	-1.21035	4.27057	-1.29052	2.95506	-5.5821	2.66131	1.61959	-4.96193	-2.09928
0.9	-1.29219	-1.42769	0.099505	-7.19052	-2.32173	0.314142	-1.88825	-0.77505	2.43198	11.0316	-2.98295	3.89265	-1.51744	2.23488	-3.50204	-0.00479	0.340903	2.62652	1.05561
1	-0.33791	0.710208	1.36146	-13.2161	0.553226	-3.06324	-0.05939	-0.08553	2.82123	8.66097	0.420143	-2.22543	0.052966	-0.50599	-3.53956	2.2859	9.89945	-2.27328	-3.44882
1.1	-0.35187	-0.90326	-1.30122	1.52915	15.8724	-1.56622	4.13799	-1.97656	4.92219	10.3686	-0.24791	-1.37287	2.9329	2.42131	-5.80433	-2.46754	2.10991	-3.68001	-4.8306
1.2	-1.22151	-1.19154	3.15885	-1.50269	-1.25896	0.142178	2.82571	-1.46565	-1.53536	5.05429	-4.14047	3.361	-2.64117	-3.84974	-5.07518	-1.66512	2.55744	-1.65763	-3.15053
1.3	-0.54404	0.558901	-1.06284	-0.92074	9.45087	-4.31542	0.454691	-0.79339	0.293952	3.47569	-4.01376	-2.94591	1.24427	0.946384	-6.28737	1.98684	7.96912	1.60376	0.88284
1.4	0.720234	1.12591	0.840122	0.904068	-2.0461	-0.27331	-0.1814	-0.35701	0.732894	1.02602	3.44195	1.81709	-0.71345	1.45316	-0.55727	-1.1563	2.15259	3.79669	-4.80449
1.5	-1.19268	-0.3433	-1.64187	1.27274	-3.1808	0.071314	3.53964	-1.19822	0.830035	6.4625	-0.00965	0.880086	1.10014	-5.62177	0.427619	-2.44577	7.11352	0.387211	-0.6554
1.6	0.786762	-1.83014	1.53557	0.295859	-3.09987	0.705652	0.214469	-1.92382	0.28117	7.0907	-2.43331	0.801113	-2.79587	-0.38887	-3.96627	4.72318	-0.37269	3.31329	-4.66473
1.7	0.135415	0.470076	-1.2681	2.34719	-1.619	-0.59619	2.53781	-2.30185	1.50039	5.44585	-0.85635	-6.66142	-1.02313	-0.99186	-5.2584	-4.05819	-5.28467	-3.16837	-4.55041
1.8	0.823591	0.039455	2.85172	1.51642	-1.31241	2.60552	0.658435	-1.03691	0.662913	5.14897	-1.22901	3.26682	4.35421	-2.27485	-2.4906	-0.02359	-2.58055	0.296907	-1.6243
1.9	0.740866	-2.18777	0.800279	3.65336	8.78843	-0.93401	1.93354	-1.91955	2.49456	8.86716	3.13121	0.475287	-3.03447	-0.14842	-2.15238	1.50352	-0.39732	0.070208	-0.10248
2	0.008598	-0.3164	1.20195	-7.97154	1.06832	-0.13634	3.92882	-0.36214	1.74705	8.12977	-0.91983	7.09341	0.516082	-1.66055	3.02554	4.15194	2.01032	4.70713	-0.43105
2.1	-0.09685	-0.76141	-0.9358	-6.99737	-2.43006	-1.97348	0.559444	2.435	2.77201	7.44045	-2.74968	1.9859	5.20465	1.85057	1.50221	3.77157	2.44775	-1.27907	-4.91505
2.2	-0.10501	-1.08549	-0.27496	-5.94735	1.09587	-1.11071	-0.0726	3.01847	2.28912	7.39114	3.10129	-1.89449	1.38038	-1.4186	-2.27996	-1.15514	-0.18641	-0.55976	-2.31579
2.3	-0.55177	0.277916	-2.88327	-6.10625	-2.20458	1.05548	1.77679	1.12432	3.22621	5.94105	1.13196	4.7103	-5.39238	-3.68916	-0.56385	-0.62987	1.6699	-4.33886	-1.07984
2.4	-0.99539	-0.43387	-3.53352	-5.57484	0.854735	3.77939	0.784363	-0.70465	-0.02247	11.9106	-2.41786	-1.55772	0.381618	-1.86531	-3.37626	4.0858	1.92546	1.20851	-1.33443
2.5	0.144487	-2.07328	-0.61622	0.310421	4.6447	0.283298	2.02667	0.811983	0.600173	2.19586	2.13435	-2.49498	-1.65132	-0.30447	-1.75798	-0.64618	0.916008	-2.92924	-0.71042
2.6	0.383581	-1.34501	0.289573	-2.2174	7.4342	0.605967	1.6955	-2.09094	2.87444	5.30194	8.24634	-4.31359	0.596806	0.824921	2.0423	0.466356	-0.02737	1.35132	-1.01303
2.7	0.145877	-0.13225	1.83096	-6.84127	-0.30071	1.01856	-2.33772	-0.6651	2.36778	-4.40919	-1.95795	-8.43286	-0.32121	2.69542	0.369579	4.79854	-1.04577	5.19997	1.80775
2.8	0.187899	-0.09751	-0.55819	-4.17006	-0.10064	-0.53575	2.35999	2.11419	1.24288	-0.62633	2.57469	0.369297	-4.8316	7.9362	-0.20327	7.24948	4.1974	2.26998	-1.11476
2.9	0.2243	-0.1495	1.39627	-6.05181	-6.05403	-1.61307	-0.78924	-1.05323	0.4373	5.63754	4.27777	-4.37852	0.31747	0.871669	0.586659	-0.3562	-3.02187	-2.69256	-0.3945
3	-0.20191	-1.2047	-0.2907	-7.91001	11.7305	0.748176	-0.75951	-1.81976	4.24227	0.20196	-1.05893	-0.01122	0.806525	5.27121	1.87826	-0.08133	-0.11532	-0.59729	0.385219
3.1	-0.68937	0.571428	0.917947	-3.20562	-8.33046	2.6817	0.547556	-2.67938	4.27509	4.23974	4.40522	0.692735	3.45784	1.76768	2.84995	-3.12841	-1.18646	-2.02234	3.80115
3.2	-1.41589	-1.03054	-1.09409	-2.24414	3.88618	2.37907	-1.24457	-1.74593	-0.19382	0.394139	-0.94278	-5.54067	0.114044	0.308238	-2.8334	5.29714	1.01466	0.918352	0.825878
3.3	-0.35056	-0.38867	1.0247	5.40158	-4.34219	2.2579	1.08987	-0.72946	1.99397	1.13567	-0.30741	1.70178	1.43081	-1.04663	2.27938	0.744616	0.425058	5.40748	-3.55217
3.4	-0.2853	1.14999	1.3792	4.66647	3.22499	0.448481	1.20934	-0.86878	4.17211	1.43702	-0.64758	0.785961	-0.85821	2.41967	-0.54028	0.286831	-2.09147	1.39561	0.312977
3.5	0.738234	0.666461	-0.7297	4.52179	6.27962	-2.01753	0.488833	-2.12633	1.76064	1.58603	-2.27036	-0.53459	4.6614	1.81077	3.00374	3.98652	-3.51985	0.515508	0.179559
3.6	0.358611	2.80086	0.648023	7.49668	5.26313	0.623426	-0.75523	-0.44758	-0.64274	3.63708	-0.28697	-4.44613	-3.56522	-0.4558	-1.7483	3.25591	-3.85599	-1.32457	-2.45513
3.7	0.18177	-0.57932	-2.1213	-1.22412	8.16835	1.34525	-1.11493	-0.12865	0.733596	2.82396	-0.65403	1.02171	-5.74875	2.41627	-0.57483	5.7013	-2.30643	4.32358	1.21111
3.8	0.63	0.296568	-1.15581	-0.39102	2.31666	1.23	-1.61066	-1.76017	1.46245	-3.58656	0.932353	2.63521	-0.31234	3.8842	1.50202	1.31489	1.08991	3.42492	-2.21792
3.9	1.93414	-2.55899	-0.02996	-0.25222	-0.1426	-0.25564	0.955381	2.66962	4.86469	-2.29178	5.12771	-0.42379	4.62246	0.599823	-1.39557	4.44063	-1.10941	0.559123	-1.0617
4	0.730166	1.26373	-0.34741	4.13081	2.92551	2.88889	-3.30815	4.29095	1.97041	-6.27884	0.047069	8.90719	-2.06959	1.52816	0.209546	-3.02944	1.9464	-3.80607	1.12394
4.1	-1.06161	-1.54061	0.733163	-0.08221	3.86691	3.14801	0.24478	-0.86668	3.38328	-5.11479	-1.08088	-3.05789	0.934124	-5.25083	0.937803	1.6411	-0.8103	-5.74872	-3.22694
4.2	-0.55742	-0.70302	-1.22965	1.71227	-1.79413	1.11834	2.00495	-0.95195	1.42463	-3.74716	3.96429	2.66318	3.82342	-2.82862	-0.86035	-1.22759	-0.92027	-1.38754	-0.88093
4.3	-2.33975	0.879356	-0.515	3.58791	5.02408	1.06751	0.247261	2.55028	4.39402	8.63431	-4.73304	2.57473	1.32865	-0.93414	0.387146	-0.38161	0.797777	1.57357	5.6346
4.4	-0.23596	0.762102	1.02574	2.85095	-2.58979	0.998614	1.11212	-3.92358	3.75714	-1.19198	-1.82244	-4.51209	-0.49514	-2.52369	1.0191	-2.77249	0.847008	0.011969	0.499096
4.5	1.48016	-0.61523	-1.18553	3.21626	1.69169	-0.18386	1.55903	-0.8516	3.58707	-4.13058	-8.29434	-7.85202	-1.77705	-3.31656	-0.48491	2.93141	1.37288	0.323431	-2.59063
4.6	-1.84249	-1.11787	1.4278	6.40016	-0.06215	2.01886	0.319061	1.37558	4.18541	-6.78959	-0.29883	-2.56575	1.6141	-2.28929	-5.09136	-0.21449	3.50615	-9.94017	-0.73878
4.7	0.785265	0.598812	-2.03668	6.47892	-3.4179	-1.26607	-0.24229	3.80547	1.1726	7.41819	-6.97326	0.842582	-2.60849	1.34319	-1.03783	2.95728	3.29889	3.2644	1.53791
4.8	-0.30999	-4.03062	0.775116	4.87049	-7.96151	0.871416	1.28809	-0.51705	5.75281	-3.75811	0.650868	5.62255	-1.82888	-6.0148	-1.46886	-0.16874	3.349	2.05298	4.18058
4.9	-0.00054	-0.83119	1.59152	7.20861	1.79446	-1.62192	-0.59274	2.06559	4.93291	-5.2082	1.45765	1.80747	-4.41466	-0.1718	-2.26533	1.78123	-0.32884	-1.34103	1.23148
5	-0.1693	-1.18101	-0.84528	7.32522	-1.73458	2.9927	4.75839	2.29203	3.73312	-10.6141	1.12622	-0.84594	0.23125	0.801472	-4.39686	0.50377	-5.20482	2.26927	1.82426
5.1	1.02457	0.841839	-0.04175	4.74619	6.46784	0.272311	4.67941	-3.14019	5.81146	1.57634	-3.21146	-0.1769	2.12276	-2.29407	-4.02917	4.61827	0.094261	2.78287	-1.04204
5.2	0.938624	2.04106	-1.60663	9.1503	1.78776	7.15843	0.832346	3.66372	4.14673	-6.91599	4.64817	4.37112	1.65319	-0.94676	-3.56241	3.00496	0.655746	2.15159	-0.27079
5.3	5.1144	-1.62268	-3.06539	11.9994	10.8309	12.3972	6.00596	8.61139	4.96018	-4.86327	10.5347	3.08887	-2.59485	11.5582	-3.46089	4.48949	0.762321	-3.24817	6.0586
5.4	3.0473	3.03519	-0.28804	21.9937	18.5517	16.915	6.35358	12.6142	8.39412	-3.90811	11.2267	9.34264	-4.14153	22.752	0.364716	3.21313	2.84502	-1.17053	11.4093
5.5	5.93443	2.67363	-2.68774	27.1742	7.9548	20.8723	9.17104	12.7242	10.0333	1.28564	13.5418	10.0258	-0.27623	27.1011	5.6141	2.78009	3.06203	10.6592	21.6644
5.6	5.21059	4.2836	0.469274	34.0432	19.8233	20.4834	7.67613	17.6947	9.48125	-2.53515	27.3223	5.32478	-2.60486	26.8179	-0.14347	5.3654	5.21155	4.91357	27.6986
5.7	5.70345	4.93656	-0.6511	35.1522	23.3418	23.0056	8.35313	18.9735	13.0951	7.75303	23.0185	12.54	-0.75624	38.2176	3.16168	8.32891	4.47958	5.95134	30.549
5.8	6.68862	6.8714	-1.1981	39.786	23.5875	21.2731	10.1749	20.5215	16.4329	1.66562	26.9201	10.6264	0.448867	44.3603	5.08586	11.3451	5.45728	7.60213	36.2026
5.9	7.31877	4.02477	-1.82371	39.8886	40.502	25.2299	13.7009	26.4915	18.1322	12.0927	24.6682	12.8414	1.57509	38.4038	6.06426	10.9633	8.53191	8.30993	30.5848
6	4.72348	3.69445	-0.94976	39.9021	32.9555	30.17	13.2724	22.8517	18.6719	7.70186	23.9085	10.9948	-0.42451	45.4537	6.88576	9.2446	11.3549	12.2648	35.1735
6.1	7.17406	6.08363	-1.00902	39.9406	32.0573	30.779	13.0728	26.0354	16.6806	9.98673	33.2994	13.7765	2.20557	41.4719	11.4123	11.9888	11.3654	17.7885	33.3317
6.2	9.29326	10.3288	-1.04663	41.4133	27.8034	29.1749	13.8931	23.3439	17.1651	11.9758	26.2844	17.3513	-3.13171	52.8949	14.9734	10.6997	12.7671	14.1748	39.3106
6.3	8.92379	9.31913	-1.46429	43.5698	29.1856	27.8725	13.819	23.9809	18.0452	12.4142	24.9222	10.0116	-1.81202	53.1763	13.308	11.9334	16.3856	16.4713	37.04
6.4	7.54883	12.7798	-0.55769	43.7652	42.2522	28.9979	13.2243	30.2255	19.7129	14.3047	26.4911	8.82009	0.853063	54.435	12.3361	14.5553	19.2363	22.6363	39.8132
6.5	9.90859	11.2321	-1.75861	46.2446	34.8068	29.0549	16.6285	30.6477	16.161	12.9597	31.778	12.3423	2.06565	48.168	15.4217	17.9726	13.2118	14.8539	37.933
6.6	11.4487	12.6104	-0.34064	44.1472	33.3082	30.3105	11.4888	28.8323	18.6185	13.9449	33.1031	11.6139	-1.07745	57.0071	18.1066	16.0456	15.4569	14.9296	37.9891
6.7	11.5558	12.2674	-2.23509	41.9272	31.4591	30.945	17.323	27.8241	20.9923	13.5076	29.196	14.4881	1.07441	60.3311	19.372	16.7551	13.8915	24.318	41.1011
6.8	11.535	14.3991	-0.4284	43.8151	36.3567	33.5545	18.1036	23.1716	20.134	9.88366	27.6672	16.1181	1.30264	56.6738	19.6272	18.4386	17.2151	18.5496	42.7323
6.9	8.61329	10.9196	-1.57328	42.8584	36.9864	33.48	15.7037	25.6002	20.5551	17.821	29.0659	16.235	7.47437	55.6306	13.4922	19.3441	20.1047	16.1426	43.2053
7	10.7119	15.0471	-0.75027	43.6409	39.9646	32.3916	16.9436	23.5582	20.7547	17.1719	30.3728	6.67756	-4.27485	61.7186	14.6055	17.3619	22.4637	24.824	44.8002
7.1	13.2321	11.0272	-2.67955	44.8009	32.2965	30.1137	18.4523	28.3566	20.137	10.5732	34.9402	12.7708	-0.83992	61.0354	15.4895	18.6489	27.2036	27.0531	43.2431
7.2	7.74377	13.9585	-2.36163	46.991	34.0982	30.5525	18.9468	24.9333	24.1789	12.9264	33.3851	11.3253	-1.68863	57.2997	14.757	18.2274	17.5176	19.232	43.2513
7.3	13.3234	13.0306	-1.42576	45.7796	41.9165	32.3141	17.8214	25.3736	20.293	18.7036	31.5687	8.60498	-3.46458	62.0269	14.59	20.1265	14.2674	24.8799	46.5149
7.4	10.6381	13.9002	1.77579	43.8979	39.0415	33.1349	19.2138	23.0003	21.6266	18.7074	33.3463	16.6506	-2.86966	61.5634	13.4415	21.8265	13.9493	13.1735	44.2551
7.5	9.59336	12.3493	0.425589	44.858	37.8559	34.0126	17.0874	25.3404	19.9935	15.1153	34.4511	16.561	3.10054	55.097	14.3467	19.6857	17.9285	22.7853	46.944
7.6	10.7737	13.7765	-2.54499	47.6663	34.6912	31.6338	17.9893	21.2867	27.7007	24.513	39.5319	17.2709	0.842131	69.2931	16.9345	17.7091	18.6351	21.0135	46.0558
7.7	13.1208	16.7611	-0.1924	45.8691	36.5577	30.4469	5.94669	20.7421	25.6225	15.3234	32.0272	14.6006	0.327098	62.3821	17.3466	22.5858	19.6271	16.5964	44.1713
7.8	10.2459	14.9263	-1.74112	45.5816	30.5889	33.5277	3.36747	22.6401	25.0778	20.9812	36.0112	7.63279	4.41148	58.486	28.8383	14.5819	20.6348	20.5044	42.4815
7.9	11.2552	15.5411	-2.6234	47.4456	35.1235	29.343	5.18459	23.1475	27.3752	17.5286	26.5951	13.3072	0.495005	62.9227	16.3213	19.6164	20.0829	19.1037	44.327
8	13.6587	13.5261	-0.79798	47.1873	33.7448	30.9684	7.11807	15.0192	23.2643	23.7217	28.6084	18.0285	5.10625	61.3295	9.18226	19.0597	17.8467	24.5158	47.5674
8.1	9.23322	15.7779	-1.07634	47.761	27.9806	32.2224	0.289104	25.2715	23.782	16.5593	30.0136	13.9253	-3.89844	56.9866	13.9072	20.961	20.0047	16.2977	46.8352
8.2	12.244	14.3419	-1.77479	45.5489	37.1894	33.4043	3.54608	24.4359	24.2434	19.4502	29.498	14.355	-0.48269	60.5499	11.3226	21.9039	16.3819	21.4301	46.5153
8.3	12.9062	14.1565	-2.0367	47.4113	44.1942	32.7777	1.75696	21.6538	25.4894	18.5802	25.6645	17.7117	-3.72016	63.5583	21.7496	22.1368	21.7411	27.5905	46.3369
8.4	11.8063	14.2671	-1.74999	44.3584	33.2674	30.4112	-1.78517	24.6134	23.4788	24.7357	31.0046	15.8775	-0.16226	63.7229	20.1773	19.0563	21.3332	18.288	47.6298
8.5	13.371	13.5845	-0.63363	44.2276	43.9212	31.5921	5.55601	25.8589	24.8228	10.0073	34.8981	22.0393	1.9197	63.3804	15.1609	20.9711	17.312	23.2583	48.0338
8.6	11.7593	13.3962	-3.42522	43.185	32.748	33.281	7.11773	23.2579	26.8484	21.4006	27.2519	22.4111	4.88424	64.926	14.9799	18.2591	17.8421	21.5584	46.699
8.7	10.6544	15.1564	-2.46945	45.7131	28.2026	33.6332	9.11124	24.746	24.1435	19.6702	25.9635	27.9023	2.35605	70.796	17.411	19.5109	20.081	22.4696	43.748
8.8	13.4819	16.4683	2.09824	47.0986	31.2376	30.2292	16.9156	27.9514	27.168	16.4769	24.0428	26.8304	-0.20443	66.5913	9.85372	20.1348	25.7275	23.8629	43.5863
8.9	9.86774	13.6994	0.343406	46.102	40.4569	31.1294	14.7454	25.9917	28.6261	18.2837	28.8344	17.1441	-0.14116	63.5151	19.7517	23.6292	18.9339	19.307	47.4956
9	11.0994	14.8426	-1.20878	45.8052	31.7171	27.7663	9.58253	27.7603	24.8339	22.2277	27.3172	17.8093	0.377204	61.9436	14.9717	24.6406	20.2304	25.7375	45.89
9.1	11.0704	13.8541	-1.90796	44.4465	32.5246	26.6581	6.75113	27.5626	28.4297	21.2163	33.0081	21.3199	5.94515	68.8096	16.3468	16.1232	17.0638	20.4847	45.3519
9.2	11.9364	11.6998	-1.69367	47.1067	35.5007	29.0435	8.69472	21.6525	26.1149	22.4076	32.2509	19.9744	3.06952	62.2561	18.2584	19.2128	16.8408	23.3012	46.0642
9.3	10.7883	15.0635	-1.07921	44.5974	39.4313	29.5446	13.0467	24.044	26.443	18.2956	34.1152	19.6783	5.96577	56.1004	17.6132	21.0401	16.9113	26.2253	45.446
9.4	10.6837	9.3788	1.77982	44.3671	32.0605	26.9729	8.26032	25.0609	29.7248	20.0815	21.8898	15.5192	2.76575	60.4713	15.355	24.3556	21.1511	20.1878	46.1003
9.5	11.3694	11.9492	1.3886	42.9274	32.9355	28.9674	5.27612	24.1918	30.0579	15.262	28.6636	16.4101	2.88126	64.8351	19.9001	22.249	16.706	28.2037	44.4777
9.6	10.5319	4.67206	1.32997	43.2429	35.9475	29.8198	3.97593	25.6943	33.55	18.6731	24.5982	10.4031	3.01424	69.9265	15.9857	21.0661	20.7831	20.8901	45.0878
9.7	11.9956	7.61909	-1.77336	44.8002	34.1484	30.3521	2.82355	25.4229	22.9415	23.5053	31.5735	17.5112	-1.37596	65.0423	15.7727	19.0707	17.5439	15.1303	46.3508
9.8	11.5619	6.29016	-3.26126	44.3908	34.1824	27.9388	7.12709	23.4056	29.6428	16.128	30.4185	14.1011	0.907782	57.1418	15.9849	21.8521	18.2265	17.8439	44.1301
9.9	10.4701	3.9793	-0.62736	42.8497	31.1747	25.831	5.50308	23.78	30.3834	14.7465	34.0342	12.9255	5.71465	59.9275	24.8233	29.2205	18.493	23.0055	43.3362
10	9.3883	10.4199	-0.78571	43.0573	31.9721	28.4566	9.56678	24.7318	28.8713	17.3033	29.2361	15.5503	-3.81125	67.304	22.606	24.255	22.833	19.5115	45.0477
10.1	11.2486	4.21872	-0.01985	44.6887	35.7227	26.0045	5.20788	23.3327	31.1696	18.1685	32.5188	20.7886	-0.00382	64.1881	25.3677	25.5499	14.7451	14.3924	45.4024
10.2	9.85269	4.64455	-1.5326	44.2994	34.1217	26.0892	7.58663	21.2709	25.9236	19.5494	30.3995	10.2693	3.04444	62.5805	21.5001	20.3223	21.5546	12.5909	48.1562
10.3	10.9804	6.26281	-1.18976	44.456	33.3615	27.2949	7.2868	26.3731	29.9917	18.6172	31.0841	12.3061	3.99361	61.657	22.6423	22.4391	18.1476	16.7344	46.7519
10.4	9.81901	3.85673	-0.85711	43.5878	31.3637	29.4055	7.60233	21.8035	28.5393	17.9327	32.1623	13.8806	2.91593	62.7141	21.3649	21.894	20.8744	24.0515	49.2936
10.5	11.8689	6.58522	-0.84891	41.6835	32.4674	28.1162	7.76599	24.0879	25.7745	22.8723	29.8087	21.4923	-1.00887	59.2466	19.0715	18.8697	17.6063	30.7997	46.4882
10.6	7.09133	5.96826	-2.40325	44.0478	36.5156	24.4882	12.1229	23.4444	26.4438	19.5042	27.2752	10.135	2.1933	66.2999	19.9937	24.2285	18.4889	21.6869	39.7218
10.7	9.74203	5.76437	-0.92709	43.3074	34.138	23.5986	8.91564	24.0969	26.9852	27.9544	29.3536	15.1153	6.16642	61.6944	16.943	21.6566	18.1993	23.9055	43.2535
10.8	8.84579	5.75393	-1.18527	42.3747	36.9711	28.8136	2.36305	20.8263	28.7066	20.0201	27.5052	12.0888	0.293304	66.3096	18.1073	21.2637	22.8338	22.7555	42.838
10.9	11.0779	8.17953	0.757977	41.519	33.9031	25.7294	7.45421	23.8008	29.9879	18.5958	30.3945	15.9951	1.7976	69.4134	15.556	24.3274	21.8562	20.2514	39.3081
11	9.34733	6.94401	-0.90112	41.6377	38.6967	24.1401	6.48671	20.6847	28.8947	19.9079	27.9395	16.3011	5.09039	58.4131	15.7073	21.1214	21.7464	16.4888	42.8329
11.1	11.0142	5.74667	-0.71289	40.9815	26.1359	24.9522	7.01405	21.4778	27.2192	25.5942	27.6555	13.8093	-0.79766	65.4436	14.6612	20.5738	18.0853	20.2523	37.4186
11.2	10.1121	6.95988	-0.67391	39.4043	27.407	24.8026	12.4354	22.6251	27.6353	22.8661	30.8655	15.2438	3.04495	64.1246	22.16	24.7811	17.6696	18.1481	38.9677
11.3	9.44126	3.85958	-1.98869	41.4632	27.0241	23.3714	5.8038	21.1152	26.7586	22.3907	25.0879	15.1421	2.05717	60.2538	21.3015	26.3514	20.1104	15.1838	37.0519
11.4	9.11748	10.2025	-0.18933	41.6429	31.8857	24.9993	7.90943	20.5927	27.8	23.5523	25.3091	13.2029	4.82679	54.9028	21.8452	28.7449	17.2158	15.9188	45.7705
11.5	8.24735	9.10974	1.43301	42.138	30.4924	24.966	10.0644	20.1427	29.4013	22.6532	26.982	17.6465	2.39075	63.7248	20.2298	21.0796	19.2501	13.3158	39.9558
11.6	7.32312	5.67126	-2.88934	39.1314	31.0515	28.0724	8.60031	18.625	29.2526	21.6014	28.3018	12.5582	6.52726	57.424	26.7245	20.5469	24.7446	17.9832	37.9372
11.7	11.4652	7.68662	-1.43595	41.5561	43.6666	25.051	6.95589	19.5516	25.0679	20.4433	29.1004	12.0224	4.62092	63.4928	20.9927	22.1281	25.6682	17.9428	40.8521
11.8	8.33611	9.86241	-0.32372	39.2664	32.9511	24.5384	19.6803	23.6267	31.8746	22.7955	26.0268	18.5848	6.84168	58.3364	12.4744	25.6903	24.8958	16.1601	44.7304
11.9	8.38132	4.549	-1.7426	36.3684	28.0903	24.5685	9.81895	21.2226	27.9212	19.6039	30.1639	17.4003	-0.50104	61.7795	11.4765	19.0443	12.0545	22.0248	39.1077
12	7.81111	11.2663	-0.99939	37.4773	23.0935	21.5823	7.97936	19.4899	26.8444	21.0137	27.6508	14.208	3.38494	59.0158	19.8406	19.5059	25.2447	15.9154	39.3487
12.1	8.95589	8.84629	-1.9722	37.2729	29.1514	22.4906	10.3512	20.914	28.9062	22.0072	25.8808	14.3759	4.8824	60.4817	19.5886	21.5139	13.213	18.8855	37.147
12.2	11.0055	10.1567	0.525504	39.504	28.8792	21.8267	14.822	19.3409	25.9457	17.4844	32.5644	13.3208	1.7272	55.249	25.9015	23.4212	13.454	21.5153	38.4461
12.3	8.15601	10.6761	-2.96002	37.0307	32.6343	21.7228	8.67829	22.7468	28.7167	17.6632	36.2123	16.2659	4.21741	57.8581	17.8469	22.0002	11.2364	23.5482	41.4342
12.4	7.05158	9.2242	-2.28196	37.4155	28.7863	22.3511	5.03453	18.0902	25.6004	18.3586	27.2631	13.9187	6.3738	62.9251	19.3837	20.723	14.9612	20.1118	37.7079
12.5	8.32124	11.1378	-2.88322	35.7921	28.488	19.9868	5.34867	21.2772	25.6423	17.4885	27.4936	15.6294	1.8977	57.2118	19.0982	21.234	24.2421	27.6866	39.2666
12.6	7.96945	10.8536	-1.50107	36.1981	31.0075	24.7526	6.78724	18.7489	26.3797	19.3505	32.5614	8.61229	2.60507	54.9473	19.3233	22.2422	19.3698	15.3146	35.7252
12.7	7.07789	9.01535	-0.94792	34.5235	27.1019	26.3464	9.6162	21.5035	25.2129	21.8597	20.2211	12.8439	5.86994	57.6173	19.173	21.6304	13.7736	21.9669	33.625
12.8	5.96964	8.10938	0.336004	33.0054	23.7982	21.6092	0.963627	20.3835	27.6525	25.1721	22.246	10.3692	5.20753	54.3405	16.11	18.2811	13.4953	19.2816	44.0474
12.9	7.53702	9.06157	1.9602	37.8078	32.1723	21.7991	17.0108	13.9436	25.5385	19.8436	29.8975	7.64299	3.77337	53.5529	20.3182	23.213	14.7401	13.9755	36.4512
13	6.91684	9.96573	2.04024	36.1925	23.5804	22.3708	4.69047	19.1011	26.1098	24.6426	25.8877	12.3415	4.83743	54.9739	21.0767	21.7334	13.6505	19.8282	34.49
13.1	6.97261	12.6582	-1.32804	37.0494	17.5522	22.7221	4.10242	20.4608	24.2662	22.8603	26.4422	6.45077	7.67488	53.2225	18.9142	22.539	15.6539	12.6013	36.5047
13.2	7.93052	7.48685	-1.80661	35.0584	33.7923	21.987	5.94324	22.3413	23.8172	25.0622	24.7823	13.274	3.28826	54.4087	19.3219	23.1306	14.8277	19.0127	37.8261
13.3	7.69603	11.277	-1.51353	35.8731	26.6446	19.9917	4.70788	18.9186	28.4038	23.1653	26.9166	18.1045	0.511466	57.208	17.2149	21.1467	14.4436	12.2932	36.4708
13.4	4.36725	4.93443	-0.75508	34.4454	24.0898	25.6667	14.1783	18.6388	27.7593	23.689	30.8615	12.3559	4.17335	58.6578	14.8929	19.3753	13.0722	15.9346	35.1043
13.5	6.14588	1.95182	-0.59801	35.4018	20.551	18.0963	9.12459	18.5486	24.8167	23.1057	20.6039	7.92287	-0.17068	57.941	18.0757	17.6956	13.4896	16.2694	34.5159
13.6	6.62527	5.18274	-0.44495	34.6132	16.2824	19.097	4.52016	15.8921	23.9373	24.2467	26.4642	6.16081	5.40326	54.498	17.7193	25.5846	14.6299	18.4853	37.8593
13.7	5.89543	3.51055	0.974699	36.8796	25.3146	22.2708	6.21041	17.7501	24.2223	19.6372	20.9788	12.6212	7.20882	53.7825	19.6892	19.0883	24.6068	17.1937	33.6622
13.8	7.39992	4.14771	0.704137	33.589	19.1993	22.4686	15.0285	18.4499	20.2145	23.0169	25.1495	12.9649	1.14621	55.6849	18.8309	11.5998	22.5985	13.6147	34.9403
13.9	7.74817	0.733233	-2.06287	35.083	22.9724	20.2218	15.7475	15.9854	22.1241	20.1632	26.621	14.5658	1.55265	51.6454	16.2747	16.662	18.8163	17.1717	33.7804
14	6.45561	4.42662	-2.00672	32.1747	20.4218	17.6246	9.30506	18.1706	26.3474	24.8398	24.5724	7.73604	2.06632	54.7961	18.0312	19.7057	22.3941	18.5701	33.6366
14.1	8.73478	-0.64468	-1.19096	32.0976	28.8885	19.7885	8.02505	16.119	26.9345	22.3369	23.5407	15.1737	9.76596	50.3891	18.7614	24.1332	20.4378	17.1973	32.8913
14.2	8.00892	-2.56643	-1.78046	32.8909	22.9602	19.6722	2.35733	13.2781	22.9496	20.1931	19.1301	4.17473	3.57264	49.2503	17.2204	20.9643	13.7167	13.7297	34.8208
14.3	5.96479	-2.51777	-2.86821	33.0481	27.6827	19.9578	17.8369	17.474	27.1575	22.251	25.6787	6.5197	1.01258	53.9439	23.868	18.7483	12.7682	15.613	34.9711
14.4	7.39007	-1.62346	-3.00049	30.9474	18.5338	23.5096	13.3262	16.2241	21.9795	21.1494	22.3146	1.70229	1.04755	55.4362	19.0763	22.1854	21.6203	18.7486	31.7151
14.5	8.85198	2.3875	-2.21218	31.5222	27.9531	19.1941	13.7847	14.352	26.5786	13.8776	24.3409	3.27478	3.71658	53.6904	18.8286	21.7138	15.6485	9.59426	31.1872
14.6	7.09692	1.5406	-0.77632	33.0723	32.4263	18.7008	3.91016	19.4386	24.2744	20.3362	25.1029	11.2599	4.11206	49.2699	13.0926	19.6359	11.1238	17.0301	31.9489
14.7	6.64039	1.84029	-1.72716	32.1498	15.9855	17.6613	6.2962	19.321	22.1117	23.8791	22.7423	10.5858	5.30053	54.7765	25.8164	23.5612	11.6252	11.0271	30.9181
14.8	8.43582	3.55255	-2.0969	32.1627	26.522	17.9568	14.623	16.0112	22.3059	18.1764	24.5076	16.9359	6.58508	50.7417	18.3543	18.9105	21.8735	11.9913	31.3698
14.9	7.34839	3.77126	-1.64973	33.7109	16.512	20.8315	8.45662	17.3116	22.9136	18.2739	25.0686	16.7399	0.614472	52.8179	18.2414	21.5782	23.1686	18.2493	30.8401
15	7.65102	1.50577	-1.91848	31.6121	23.2206	20.3156	8.11638	17.8043	20.6122	24.2808	18.3794	15.4144	3.57811	49.3416	22.5437	20.3383	19.836	12.3803	34.4787
15.1	7.14555	2.1023	-0.18499	31.6318	22.5597	20.5827	6.71453	14.2952	23.2012	13.4854	20.3509	17.8463	7.31273	50.532	17.0537	22.6542	12.5569	17.5484	32.2968
15.2	6.27693	3.14027	-0.77538	32.779	18.9262	15.5455	14.9091	14.9348	22.5876	13.7603	22.3409	19.5854	4.0552	50.8913	21.2765	17.1046	13.7093	12.9807	31.0252
15.3	5.9614	2.98781	-0.54392	28.7765	21.3082	16.2612	15.3718	15.0772	20.8872	9.82871	19.1365	19.4148	7.20291	44.3999	13.6191	21.7152	11.6385	20.0691	29.5017
15.4	7.35623	5.1467	-1.42462	31.2618	17.6244	18.2148	8.14727	17.2847	19.4012	13.956	19.9278	17.8955	2.33403	53.6792	13.6397	21.1524	11.5484	9.99024	31.6838
15.5	4.8344	2.38012	-0.42075	29.9166	27.6811	17.3462	16.5341	14.2187	22.0294	13.0099	15.985	15.2994	3.17578	56.803	15.1794	22.9495	9.23337	9.00073	29.6602
15.6	6.35727	2.55897	-0.18262	29.5789	23.0656	19.3724	10.9742	14.9165	21.5449	17.427	23.2526	11.2699	4.60253	45.6221	13.4449	24.3435	11.0197	16.3178	26.2232
15.7	8.17343	6.12504	1.29305	28.5765	22.4266	17.0052	11.1206	14.4102	24.9158	17.0109	23.8647	14.1047	1.23265	50.4538	15.8645	22.5002	13.4111	10.3233	26.653
15.8	4.99096	-0.24299	-2.21041	25.8352	21.5693	17.9982	12.7085	15.0639	22.7457	11.57	24.9979	16.1549	2.21864	45.1446	19.2058	20.8557	10.8313	15.4522	29.5129
15.9	6.92292	3.85771	-1.52726	31.4923	21.7775	16.3102	8.5943	13.3506	21.3686	11.5843	24.0909	15.7376	8.47312	49.7663	14.1402	24.7643	11.0389	11.123	32.9539
16	6.78317	1.98756	1.66923	29.5514	17.268	17.4091	11.5659	12.5208	17.7029	16.0746	25.1248	16.93	-4.60338	51.0217	15.1077	17.4993	11.5953	4.54247	26.9646
16.1	5.74146	4.32911	-0.81039	31.3503	23.2476	17.8865	11.5968	15.4649	18.3363	7.9805	16.9206	9.86606	-2.21314	51.5248	18.531	17.423	11.4875	9.97641	28.1852
16.2	6.2096	5.42468	-0.70286	27.6901	17.4622	17.141	6.74775	15.6445	18.8285	21.1656	16.5233	12.1676	1.54941	49.9799	11.3392	18.9526	9.75886	8.83875	26.9885
16.3	5.93495	4.28277	-2.35633	27.275	19.4451	21.1202	5.38758	13.5018	22.3303	14.9672	18.6489	6.60656	0.596243	45.3991	15.1107	21.9237	10.6619	4.49265	25.8472
16.4	4.59017	5.1759	0.686201	25.9152	18.4963	12.4012	14.7706	13.0545	18.98	13.314	22.6486	12.0058	-0.65526	44.5827	17.1003	19.8618	12.3873	8.60701	25.2405
16.5	4.46499	4.79113	-2.89248	28.1301	22.7452	17.3817	8.30731	16.1048	18.5295	19.4597	18.3108	3.35794	4.20082	49.9594	18.0919	18.4133	9.54305	9.47089	28.5439
16.6	7.24164	8.89694	-0.99288	27.9062	16.8721	15.7789	9.69542	9.16059	21.4372	18.1051	20.3727	12.6459	4.07397	46.225	16.6728	24.2855	8.14839	11.3489	30.1433
16.7	4.3294	9.71379	-0.01183	29.6897	25.9932	11.0877	12.4557	8.86901	21.3431	15.8833	18.5225	13.182	1.31916	45.1685	12.6917	24.1589	16.4779	12.8085	22.1888
16.8	4.60106	9.71966	2.18074	27.1544	19.849	12.8607	13.9258	11.7807	20.1214	16.4229	17.6488	4.79335	6.64863	44.4945	12.8121	20.4775	17.5498	6.90757	23.5713
16.9	5.32874	8.39054	-3.43868	26.3194	14.9629	10.751	14.1066	8.01946	21.0231	15.6227	15.3528	7.53769	2.96994	44.2515	14.9478	19.5719	11.4529	8.54802	23.7307
17	3.82859	9.1617	0.860027	27.4174	17.6892	12.7212	13.759	11.7486	21.6448	18.9861	15.024	9.91319	5.23293	41.7741	16.0152	21.0391	7.5591	15.998	29.9761
17.1	3.00334	10.4238	-1.21909	22.4064	12.0746	13.336	0.208228	11.7109	19.4712	20.2099	16.5094	5.17378	4.93775	43.7372	13.5667	14.9972	11.5674	5.22633	25.2281
17.2	3.69153	5.37614	1.15112	24.342	9.19269	16.0107	12.9387	11.6436	21.4579	16.8486	19.6917	8.22253	4.49389	46.0833	15.1738	20.3075	10.9564	21.304	23.2371
17.3	4.81349	7.4851	-0.67	25.0874	15.6909	16.3036	11.3581	13.3234	22.2302	12.5553	16.72	13.9843	2.92213	43.3457	18.2173	19.8669	11.714	9.82904	32.6556
17.4	5.06224	8.6239	0.423148	25.0457	12.5647	12.9146	12.7615	8.08948	22.1154	14.6877	14.1905	12.3379	0.146896	42.2017	10.2983	23.4505	12.5362	13.8455	21.2207
17.5	2.83747	9.05557	0.555899	27.4805	17.961	9.50352	14.2026	7.1079	21.1008	12.7055	11.6577	5.10096	8.01825	43.5791	9.95495	10.9652	12.6452	9.97665	26.5772
17.6	6.04715	5.92653	-3.43258	24.1451	30.5846	11.7757	12.8501	9.65808	22.3822	15.052	17.9296	7.3698	5.13027	44.4282	8.23961	15.1771	19.1907	10.1325	24.5745
17.7	4.87698	6.94577	0.950167	24.3082	22.4011	13.484	2.94825	11.3036	24.5881	12.411	12.1923	10.7411	4.24079	43.1732	9.8671	20.4052	19.5282	13.3282	26.1966
17.8	5.88203	9.24457	-0.17269	24.3282	17.9987	13.5782	-0.45272	11.246	23.5288	19.0284	16.1672	16.1449	7.36461	49.5144	13.8691	21.1851	19.2917	7.92391	21.1835
17.9	4.33676	3.85814	2.03458	25.9439	18.8601	16.3993	12.871	12.0268	19.7095	14.0715	18.415	8.22217	7.19357	43.4209	18.6121	15.8299	8.24427	6.76461	23.5186
18	6.43917	5.23538	0.545543	26.1899	13.601	13.219	11.1889	12.2607	22.9736	16.8919	16.6424	11.0101	8.95125	41.0006	13.2447	18.1514	5.84157	7.6285	22.4723
18.1	5.63399	5.05217	1.71514	24.7246	18.7469	13.0369	8.21456	12.9616	18.8149	10.1148	22.186	7.72052	0.904103	38.9402	13.8782	16.5538	11.4654	4.64161	24.8973
18.2	4.60991	7.35286	-0.37104	24.9528	14.8503	13.0378	10.9722	10.2652	24.4562	18.2881	11.9395	10.8587	2.86749	42.03	13.9659	18.2541	10.275	10.2849	25.0546
18.3	5.18929	1.32873	-1.33539	25.0179	19.6698	13.991	11.6427	13.5228	20.42	16.1325	20.5447	5.75326	5.63655	40.5862	14.2178	11.3294	10.8228	6.33621	24.3937
18.4	7.01142	4.27654	-0.04441	22.8763	18.5267	13.8866	12.1466	10.7588	22.5689	11.2205	18.9487	16.8079	6.39705	36.6648	10.6904	21.9652	7.91541	5.71688	20.2436
18.5	2.64273	3.87173	1.41849	23.5966	15.5047	16.227	8.31086	12.5506	19.4704	18.5516	15.4999	15.2472	-0.14162	43.4814	9.38651	20.8498	7.12487	15.2912	26.0582
18.6	4.13471	5.55351	-1.73514	22.7153	14.7491	14.0683	11.7668	13.6356	20.6839	12.311	15.0711	7.11365	-1.43388	45.0419	13.3044	16.8052	5.54039	8.68958	19.8884
18.7	2.89622	5.55269	-0.50252	25.0103	16.3367	12.9955	10.6881	15.5898	20.9168	15.7898	20.6463	9.34188	5.00376	41.7517	15.568	14.0239	6.22511	10.4666	23.1172
18.8	2.81584	3.35535	0.715414	21.4252	18.403	11.7572	3.98211	11.1259	18.0836	13.2763	17.2098	4.87747	1.56416	46.7619	17.3798	16.4315	7.9801	2.28024	20.169
18.9	4.80429	7.62693	0.435146	23.6627	15.4142	11.8339	-0.2458	15.3059	25.2086	16.0194	13.5615	12.2155	3.79704	40.9897	10.5657	17.0011	8.24872	10.1696	24.7128
19	5.43492	4.56944	2.60112	24.9744	21.703	13.0203	0.80787	14.3383	19.847	17.3982	9.49105	10.6969	0.945699	38.0895	4.95764	16.7295	3.4572	3.32813	18.2056
19.1	5.965	5.78935	2.40045	22.0577	15.6116	12.6762	0.974731	13.9808	18.824	17.1011	16.174	5.38861	2.27563	41.3105	18.0282	20.0101	3.29768	5.52166	18.6305
19.2	4.16352	2.93752	2.86168	23.8815	21.9903	9.85635	9.08257	13.7969	21.0766	20.4368	19.1571	9.15671	1.72232	39.7879	10.1845	16.0884	4.06515	10.1669	21.9611
19.3	4.51363	2.58811	1.23015	22.0317	10.6117	11.1823	12.555	15.6356	18.7302	13.9391	14.7514	9.68714	4.30031	40.1161	6.23875	21.8819	5.18763	17.3006	20.3629
19.4	4.4868	6.1956	2.58789	23.6892	17.2249	12.5609	11.2157	10.5228	19.6623	15.5358	17.7651	12.8711	4.05453	42.9881	8.82328	18.4049	7.69856	7.70956	20.5911
19.5	3.52138	6.46672	0.534967	22.5455	7.76195	14.3096	-1.75394	8.35514	17.1155	16.4955	14.0804	7.36148	-0.27194	36.4719	10.8022	15.1889	4.20976	9.27172	26.0137
19.6	4.18578	4.98558	1.67145	22.014	20.4327	13.4237	-0.02797	10.8466	22.5778	18.9877	16.2736	11.1719	7.60661	37.0171	6.73523	18.0845	6.5867	5.84923	18.6083
19.7	3.2616	3.95896	0.365844	22.1024	19.7123	11.5699	3.16767	13.1183	17.0677	20.7744	11.9837	9.531	3.66545	41.5852	15.4009	16.5435	2.03084	14.0275	21.5131
19.8	3.46764	7.20178	1.37418	22.4788	9.34677	9.60396	1.12929	7.20889	19.7962	16.2319	14.8747	4.28092	0.148706	39.042	12.7787	16.6351	7.1225	4.93141	16.5034
19.9	4.19923	3.20956	0.271267	22.286	9.35649	12.6443	-0.72917	9.72425	17.7315	18.7549	10.6805	12.9264	4.94008	38.2666	15.2676	16.3055	7.21935	6.27412	21.8697
20	3.61837	5.79899	-0.44466	22.112	10.4562	11.0321	-2.52892	14.714	16.9549	22.1991	16.5335	8.542	8.1946	43.1577	10.6885	21.2458	3.88084	8.41833	20.1013
20.1	2.96305	3.66601	0.938339	18.7047	11.8662	12.0201	-5.09962	9.19354	21.6156	18.0734	14.4558	11.6249	2.97248	40.5781	12.0016	14.7631	4.96775	6.39121	19.0568
20.2	3.39352	0.998775	0.615285	20.7041	2.78278	13.0158	2.79317	12.6922	17.4102	18.1441	11.0634	2.41592	-0.92202	36.6952	7.12301	13.9493	3.03832	9.44321	21.5773
20.3	3.05603	3.55582	2.76206	19.8732	18.1571	12.1514	6.90616	11.2481	17.7485	19.2132	8.62207	10.5936	0.123283	37.1057	11.7735	14.6127	2.92628	8.52451	19.5759
20.4	6.03611	-0.14717	0.751916	20.8599	16.7986	10.3401	-1.70186	9.31357	21.6416	12.3937	13.2508	10.099	9.5094	36.2538	12.8957	19.8623	4.67828	4.85969	21.7717
20.5	4.40069	4.68864	-0.01413	20.3863	16.4096	10.0505	-1.1983	8.81029	20.25	22.1784	16.7577	8.15535	5.89751	43.3768	7.98536	16.0359	2.92656	10.0232	27.1575
20.6	2.7281	0.651157	3.29308	23.0548	12.6299	15.3869	3.61629	10.3245	17.9593	7.97018	10.64	9.09359	-0.17275	40.9592	12.4172	18.618	2.87368	4.56124	19.6245
20.7	2.94427	4.5006	1.2905	20.6342	9.28112	12.3089	-1.86682	11.9117	19.5187	16.8697	16.0297	5.49392	2.04439	35.4611	9.36883	19.128	2.38765	7.05188	19.138
20.8	4.19952	1.39676	2.19983	20.9236	11.6777	14.6028	-1.33998	9.80886	15.1826	22.6114	12.48	-0.80598	4.82936	44.4215	6.89809	21.6937	7.24913	3.45095	20.6147
20.9	4.89575	0.836609	0.177956	21.5533	12.9832	12.0223	2.22104	6.57745	16.7227	13.9876	12.1906	5.55775	5.01082	35.5461	8.94665	17.8841	4.7201	9.29485	15.7857
21	4.99705	2.37685	0.846621	22.1283	5.03438	8.02619	-0.42689	7.53559	19.7218	11.4345	11.3354	3.77965	6.38336	36.3991	7.54017	20.6573	3.66376	7.66449	17.6951
21.1	2.29988	1.80033	0.860726	21.0017	11.5435	11.001	-4.0946	10.0645	17.231	12.3077	14.6572	10.968	5.17135	37.925	7.73747	14.5874	5.60269	2.58609	15.7922
21.2	0.8093	1.12883	3.51749	20.5559	11.0511	13.0502	-4.82832	8.55159	20.1761	17.2634	13.048	10.2663	3.34473	36.5588	8.26964	14.2732	3.98371	4.43101	16.0333
21.3	2.63107	-2.06072	0.439711	20.458	9.98501	8.79634	-0.91689	8.16156	19.0309	15.4116	11.7853	7.72143	8.35643	36.4321	7.83128	13.8145	6.43902	3.95463	17.1094
21.4	3.08707	-2.30405	0.846832	20.1274	13.9938	14	-3.14242	6.47862	19.0431	3.28411	13.7603	12.498	-0.58804	34.1825	6.46407	14.8917	4.21168	1.04731	20.8441
21.5	3.04022	-0.89998	-0.27647	20.4022	12.0005	10.937	-3.26855	8.52602	19.0575	9.64132	11.8169	6.2436	3.20538	38.6099	13.0599	12.9301	5.55082	10.2276	17.5741
21.6	2.80989	-2.04528	1.58243	20.8083	12.405	8.40943	2.05815	3.01073	18.4676	18.3765	12.6908	9.37522	3.44723	31.3607	8.82474	10.7261	3.58712	2.04018	18.1225
21.7	3.56973	-0.17608	1.57243	20.5102	12.8292	10.5154	-3.94232	8.46264	17.8221	17.3275	16.8833	4.73225	-0.00084	33.9953	12.5979	17.8839	6.10156	4.51676	19.5848
21.8	3.64028	-2.59491	2.63682	18.1901	8.35682	11.196	-0.00544	4.52058	17.0706	14.8493	19.8784	4.86686	1.08504	36.2444	12.4449	18.1838	4.00315	-0.07124	19.4565
21.9	2.75372	-1.81754	0.098313	19.6721	16.9041	10.2172	2.13376	6.88079	18.7306	13.8629	10.6833	3.89414	-0.24704	35.9494	11.6107	16.5446	4.11869	4.57014	19.9871
22	1.04474	-5.28614	3.35946	18.2896	11.8674	11.1221	1.03133	5.90707	16.1591	14.9492	9.95942	3.86313	6.20636	36.3714	2.91546	19.5277	5.21713	6.06401	20.0191
22.1	3.55594	-2.11678	2.04914	16.9669	17.5724	9.363	-0.78551	9.05414	15.9535	9.59766	10.646	-0.39582	5.3669	39.5431	7.65136	20.6237	5.10492	4.12907	21.8175
22.2	1.33325	-0.65773	2.19829	20.3933	8.73321	9.30959	0.338705	6.86792	15.8661	15.5122	12.5073	2.0545	1.79637	41.4476	8.52032	17.8915	5.82436	5.01586	17.4309
22.3	2.32808	0.577228	3.21089	19.0621	13.0098	9.61843	-3.39861	8.9123	13.4719	7.1316	8.98652	6.11976	1.47192	35.1837	14.7686	15.1724	5.17536	9.89273	14.704
22.4	2.72196	-3.90058	2.60945	18.2062	9.97777	9.87413	1.23883	4.61425	16.4217	14.0132	15.3551	1.55223	1.95798	36.9898	5.49469	18.1956	7.94544	13.0642	16.0022
22.5	2.72201	-3.10321	1.4519	18.5432	15.3165	9.73553	-2.77101	4.87186	13.6224	12.5422	11.9488	2.53675	3.54787	36.8461	9.68132	15.7415	8.56259	13.3761	17.2978
22.6	2.81815	-3.24814	0.643222	18.3255	12.61	9.24205	2.74863	4.19527	16.9837	11.7999	8.90618	9.5216	-0.69869	32.5602	5.65591	17.8472	7.22112	15.3995	13.7921
22.7	1.52165	-5.21558	3.53152	18.161	11.2535	3.76317	-0.62184	6.53277	17.5071	10.7427	14.036	4.12359	4.5369	33.9564	14.1741	16.775	13.116	-1.70804	14.0607
22.8	0.689492	1.82903	0.621626	18.657	12.9853	6.90375	-3.05787	4.48521	19.0167	13.4984	14.046	3.45513	4.63259	34.1358	7.0805	16.5525	8.44092	6.15948	16.889
22.9	2.06673	-2.08527	4.84892	16.056	15.2475	5.6526	-0.9787	6.5228	18.5317	19.33	15.61	2.56156	7.77481	32.1028	11.5431	15.265	5.99066	3.50763	16.6461
23	0.976879	0.857502	4.70192	19.1853	9.75722	6.63635	-2.3609	8.07066	14.5984	16.7268	4.98076	2.14433	3.20929	39.8719	8.84901	15.8619	7.87292	12.3302	14.4941
23.1	2.54613	-3.25884	0.955088	16.5742	8.91607	7.36678	-2.69125	3.20304	16.7169	14.2481	13.8062	3.19776	3.84175	32.4504	10.2511	14.0916	5.8549	10.4266	16.8687
23.2	1.7943	-1.45053	5.06649	16.142	7.0715	6.14832	-3.0673	4.9748	15.7717	19.1656	11.3207	0.54142	0.434253	32.0211	12.2378	14.6408	7.30522	7.79671	14.5879
23.3	3.04024	-3.45292	2.43517	17.5167	4.78805	7.06736	0.393748	4.24263	13.5807	21.6292	15.4369	1.38791	0.534881	35.9368	6.87779	13.02	6.97942	7.66397	14.8773
23.4	1.29554	-0.89572	2.27068	16.9148	13.5662	7.47927	1.53635	4.20097	17.7235	14.0876	10.6889	6.49776	-0.46725	35.8323	9.58389	17.4835	8.66371	7.58395	13.58
23.5	1.84149	-2.79435	1.67558	15.4789	8.75121	7.71898	0.732753	5.63548	18.8096	18.638	1.85103	0.862236	0.286663	35.2798	5.17462	13.1824	4.67076	12.6175	15.1429
23.6	2.64733	1.43602	2.34449	14.4015	16.4479	9.13313	-2.81794	6.75242	11.8648	19.9747	8.09998	7.20951	3.49064	27.5323	9.35622	14.8113	7.74713	14.415	18.1467
23.7	2.88865	-0.39786	2.1102	17.3408	12.8104	10.477	-0.6469	3.28422	16.3408	12.297	6.96969	7.86657	1.00403	36.1702	3.78087	7.57036	4.11828	8.43791	17.1084
23.8	3.38601	1.04134	0.458151	15.6321	9.90724	9.26068	-4.58164	6.12423	13.2624	15.1497	11.9609	4.07728	0.928176	29.4407	2.68849	15.8393	6.72546	7.5291	14.7199
23.9	2.13051	-3.16764	2.57692	14.1335	12.8104	8.2371	-3.51354	7.29454	18.6538	11.2845	6.77934	6.07601	2.13271	30.8616	10.5237	14.4256	7.34374	10.739	17.6059
24	3.42581	-2.6358	2.91909	15.6424	9.0475	12.7427	-3.59155	8.25204	16.1381	17.7756	5.75471	0.922312	1.06555	32.163	8.5511	13.3702	0.150987	4.42272	13.4362
24.1	1.22366	-2.24554	2.86334	16.1299	13.4979	8.84624	-3.33152	2.46366	16.8582	12.5401	12.102	0.245962	0.729687	29.5579	11.2808	9.93992	2.98206	9.08168	18.0586
24.2	0.535672	-1.52055	3.83029	14.2079	10.3296	8.52151	-3.76437	5.92677	14.7943	8.73489	16.8759	8.64743	0.192607	36.1777	7.86467	10.5825	7.66459	8.11458	17.4661
24.3	1.09562	2.82329	2.76706	14.4622	12.1528	10.5462	-4.11165	10.1948	18.6845	11.0748	15.3229	0.439432	-1.92025	29.0371	13.073	15.6821	7.43447	6.3018	14.6861
24.4	2.85625	-1.55319	4.78972	11.6763	9.37111	7.85021	-3.72886	7.36949	12.2668	10.1092	3.02247	5.95547	1.77949	28.5214	7.81415	11.2822	6.37918	7.17205	11.6778
24.5	2.68438	-4.17846	5.30491	14.4604	12.59	8.46637	-4.62071	8.94174	14.7721	19.0837	12.0395	4.78178	-1.56503	28.4952	12.6701	10.3604	5.63516	12.8255	15.085
24.6	1.79279	-4.4271	3.00606	12.7772	6.55376	9.40155	1.7611	5.95327	12.0592	13.6798	10.7032	-2.01579	-2.88639	32.3639	11.1444	14.7495	5.79839	8.00237	12.9004
24.7	0.542184	-4.74028	3.17806	14.2111	12.2809	7.28816	-3.31679	3.41089	13.3612	10.6133	6.18662	2.63583	1.42479	26.0645	6.17471	13.7321	6.5329	7.60483	17.7195
24.8	-0.09182	-3.91809	3.64266	11.5079	8.3483	6.99878	-3.27454	4.15111	12.9304	18.5032	11.294	6.24261	-2.55574	30.2067	5.74552	13.2684	5.38295	7.32041	14.1221
24.9	0.358637	-6.21694	5.6118	10.9302	9.66184	6.31718	1.72325	5.87357	16.914	21.1949	18.5924	-1.54754	1.01546	31.1386	5.80905	7.50269	0.82703	8.9248	13.6655
25	2.3371	-1.02095	4.81074	15.4355	12.8562	7.96561	2.31587	2.60985	12.4989	22.8109	12.6484	6.01825	1.28503	32.5212	8.47861	10.7209	7.19738	10.9922	14.7876
25.1	1.78269	-4.07473	1.86086	13.7955	6.15022	4.65803	-4.02031	8.42091	12.7519	19.2481	13.4694	1.16305	4.53868	27.2576	10.0265	12.8274	5.83947	12.7361	12.5101
25.2	2.04473	-3.07763	4.01672	11.9831	15.9684	7.03469	-3.37405	7.48478	12.1533	17.18	6.83823	-3.03688	1.78377	35.3133	0.794965	15.8363	6.4882	13.1057	14.1014
25.3	3.23962	-2.45084	3.72051	11.6272	5.19201	8.25273	-1.64864	2.92664	11.3601	25.3831	-0.64848	9.37071	4.07938	25.9803	5.46959	10.7608	4.40294	5.65415	13.324
25.4	3.15418	-3.34795	3.69565	13.9252	6.33663	6.13942	0.545215	6.03787	11.6769	16.944	13.6442	4.79139	7.01931	25.0798	-1.49659	14.2426	6.79478	6.82293	10.9392
25.5	2.65121	-3.25516	4.39425	14.5723	6.94124	6.69764	-3.0861	2.63993	11.7076	5.2281	8.87028	3.89567	-4.05159	31.7423	11.0476	9.26226	5.83771	2.68625	8.0475
25.6	2.60422	-4.7147	4.042	12.9836	9.00991	4.77249	-5.01039	2.87134	12.0221	14.7962	10.4568	4.51362	1.61893	24.9436	7.83568	11.246	5.08454	2.13533	11.1532
25.7	0.963804	-2.46709	4.3924	13.1028	2.16732	7.89985	-1.57656	2.70424	14.2884	10.397	14.1474	8.74529	1.23501	30.6278	6.70947	18.4754	8.04017	10.4206	8.84554
25.8	2.84347	-5.16077	4.82334	13.5318	5.16497	4.05434	-1.97142	4.31482	9.43049	15.3522	12.5548	4.29752	-2.38284	29.1528	12.1851	8.8876	7.2012	-0.88297	9.47655
25.9	4.18961	-7.39399	2.25586	12.3863	13.3212	5.75327	-0.80728	0.049788	11.0449	11.4241	6.40731	4.33119	1.48144	30.3811	5.3621	13.7139	5.21067	5.71064	8.6478
26	3.12002	-3.81748	2.5986	12.9683	5.50026	6.72971	-0.8643	0.576785	10.9621	15.6899	4.67651	6.28487	-1.36102	27.5854	3.7862	11.3081	5.86469	15.3455	10.9067
26.1	2.91475	-3.52307	3.2666	13.4072	6.38368	3.55027	5.58693	2.49849	12.6492	17.3829	11.1594	3.54003	-0.92718	31.1648	8.93907	11.9505	8.16027	9.88461	14.1544
26.2	1.6488	-6.84676	2.7095	12.6259	4.78697	7.08632	1.25945	2.16794	10.9857	18.281	2.97051	3.80706	0.56385	30.8619	7.07586	10.0166	8.21367	8.20635	12.24
26.3	2.35554	-6.23698	2.38858	13.1241	11.2903	3.00096	-6.32134	-1.09915	12.1443	15.8973	0.632992	3.22614	1.31175	32.228	11.8367	12.2149	5.56761	13.4057	7.30786
26.4	4.36463	-5.95458	4.61403	11.9059	12.4905	3.93745	2.50942	-0.08517	12.138	13.2715	8.91501	7.65808	0.786105	33.2248	-1.6427	11.5724	7.75423	9.0864	8.81361
26.5	2.45279	-2.77264	5.07436	13.0082	11.5108	4.59336	1.42309	1.0421	8.75068	23.6523	14.7281	7.55791	0.458064	26.493	6.28591	12.2524	3.49536	12.5081	6.05746
26.6	1.9407	0.32632	1.69706	12.3257	3.98095	5.66261	2.97134	2.98984	11.3414	17.6715	10.884	4.51642	-0.23471	25.2073	3.00046	11.993	5.59952	9.87652	11.4788
26.7	1.31308	-4.11249	3.78575	9.99891	10.4107	3.43452	4.61671	-0.7565	13.156	15.8009	6.75498	3.33834	2.7779	25.0499	4.82319	10.4803	5.0702	5.48718	10.5204
26.8	1.02635	-2.87768	4.20561	10.3995	5.82779	5.8204	-2.33035	2.15669	10.6029	10.388	9.41123	4.69665	1.51673	25.6013	7.4408	10.7982	5.96702	4.30707	7.61498
26.9	2.33964	-3.45841	1.92959	12.3202	12.4633	6.28728	1.57555	2.43725	13.1318	5.49918	3.51198	4.99583	5.92769	26.3662	1.0807	11.6496	6.64374	5.38981	6.25271
27	2.45841	-4.14583	3.06499	13.2684	9.05255	2.59335	0.376373	0.712452	7.50134	8.10342	1.66252	9.77718	5.2934	31.4758	1.52847	7.42702	6.66989	6.05033	7.84503
27.1	1.46375	-3.94266	4.69165	12.403	7.21725	5.68308	0.980282	-1.1713	10.8411	17.7072	11.4478	10.9609	3.39536	22.7954	16.8416	7.02749	2.98829	1.52233	4.69022
27.2	5.49373	-6.25486	-0.14923	12.4838	12.4216	4.96367	-9.02253	1.50676	12.0983	11.8969	8.86995	10.1182	7.06501	29.6172	1.82193	7.82263	7.05748	9.23595	9.63279
27.3	1.93602	-3.43493	1.26367	8.61119	4.95926	6.40284	-6.69136	-0.56757	11.3386	18.3293	5.20658	7.9333	3.39991	27.4024	2.65652	8.47396	5.03758	8.32483	9.4588
27.4	0.205414	-6.57237	3.12762	8.54757	-2.55792	5.39322	-5.69234	5.95391	10.215	15.2935	8.13073	11.411	3.64642	25.8164	6.98686	13.8981	6.46866	7.9591	6.90846
27.5	2.18876	-4.12308	5.04678	9.94709	13.776	4.80714	1.20469	-0.34731	13.9697	16.5733	7.97589	6.6245	-0.48898	25.2397	7.53512	10.9594	4.89499	12.1	6.58404
27.6	1.68726	-3.65223	4.82898	10.9304	14.4462	4.3815	2.24373	0.353991	9.84692	12.9157	6.54823	2.97387	1.61479	24.4339	7.9097	8.75887	2.60214	9.24501	8.97752
27.7	2.3882	-6.81016	2.59609	13.15	8.94968	5.11458	1.99918	0.562121	11.481	14.7466	5.63444	7.66592	4.04442	21.9566	11.1728	7.02684	4.21216	13.8349	6.51604
27.8	5.06713	-4.372	3.38482	13.1746	9.83079	6.20208	-0.27744	5.40624	10.9527	5.96346	5.02342	7.25522	4.14668	25.0058	6.89274	11.3027	5.38662	10.017	5.34107
27.9	0.643588	-5.79615	1.81924	12.5451	6.4088	4.77401	0.786888	5.69623	17.605	14.2667	12.0443	11.3443	5.07528	31.2079	11.0103	5.89184	5.90945	2.73558	7.00784
28	2.22269	-6.40129	3.25483	13.6573	3.74531	5.47255	-4.36292	0.668249	12.479	14.0856	4.72568	14.0843	3.66179	32.3947	9.28075	9.11829	3.28894	9.96898	12.4154
28.1	1.25534	-3.84654	3.25908	10.9404	11.3395	5.98402	-1.07832	0.186171	11.5828	8.52159	11.1975	13.3327	0.689333	23.049	7.7539	9.78493	3.75845	7.79565	6.24168
28.2	2.70655	-5.65166	3.5289	12.126	11.6958	7.76883	-3.11356	-1.40409	8.82224	10.6639	5.78898	9.62585	5.32541	25.5263	12.36	11.6523	2.60856	7.51629	6.12351
28.3	3.23793	-1.03792	1.13008	8.13037	6.29676	4.68842	-1.24434	-0.90878	8.25521	7.43491	13.031	10.7777	1.84565	25.376	5.5734	10.5425	5.90442	15.3303	7.34753
28.4	1.0647	-2.46478	1.82796	9.35957	6.74432	5.2655	4.77166	-2.65107	13.659	9.51727	16.1633	11.0538	2.08057	28.5274	7.03478	12.5161	1.95122	7.15537	12.446
28.5	2.65363	-2.80249	4.9783	7.761	6.71496	4.3314	3.64685	-0.40186	11.989	6.20325	8.86723	3.50122	-0.11903	25.6988	10.7575	9.63595	3.48828	16.7344	6.03863
28.6	1.48451	-1.89976	1.73767	8.29888	3.31537	2.70942	0.816	2.74806	12.1793	6.71584	9.3949	9.48887	-3.50033	21.7352	8.82884	8.31859	5.11803	10.7705	5.79558
28.7	2.34071	-2.99435	3.86071	9.3585	6.76915	2.92717	6.2161	-1.28536	12.3296	15.616	12.038	8.23648	0.965447	23.1519	10.7164	11.1996	4.35958	7.24695	4.79364
28.8	1.54954	-5.26627	2.81029	7.43124	6.44931	3.10051	5.46882	-2.96632	13.655	6.66076	16.7619	7.66172	5.3271	22.6222	3.47302	12.5875	1.80578	6.28265	8.03181
28.9	1.11798	0.248072	1.09086	8.28159	10.1687	4.92408	-1.50798	-1.41278	11.8156	9.12179	13.1312	8.0518	0.339364	25.8431	0.183461	8.19034	2.8909	7.79762	6.35429
29	2.90114	-3.60005	1.67354	10.6631	3.36445	5.16299	0.791939	-2.12952	9.84514	4.09141	9.57786	8.60787	-1.23382	22.6072	-0.65375	4.76591	2.94504	4.48366	6.11352
29.1	3.49782	1.93425	2.05806	8.97975	4.63608	4.12712	1.75557	0.342294	11.7453	7.99197	4.36642	5.69854	6.1608	20.5619	4.25227	9.8599	2.82021	9.26791	6.05314
29.2	5.68994	2.83176	1.44534	8.47882	10.5891	4.87142	-1.68804	1.22252	12.793	8.48363	7.82966	-0.08241	-0.02172	18.4005	1.70023	8.01785	2.33751	11.6303	5.53633
29.3	1.50253	-3.69441	1.40868	5.13008	6.34525	4.45919	-2.86911	-1.74749	11.277	7.96743	7.95621	5.34804	5.33756	18.8277	3.31097	6.61024	1.59155	-0.28319	6.76745
29.4	1.78482	-2.88987	1.73762	10.6451	3.84774	4.01331	1.28248	0.120683	12.8707	8.14745	0.497807	8.37937	1.46026	21.46	10.5459	11.6794	1.71704	15.9678	4.3682
29.5	4.18967	-2.50446	4.32694	9.23791	4.36794	4.24738	-1.28956	-1.17487	9.95124	10.1621	4.71757	3.12221	-2.20434	21.2165	3.19568	14.8398	3.21638	3.37645	5.36265
29.6	2.5583	-4.57848	1.70736	9.05657	7.33206	2.54762	-5.40286	0.256122	9.71522	10.7152	2.62528	4.8659	1.45385	17.5359	-4.23305	15.6738	1.85144	12.5491	7.89827
29.7	0.915418	-1.5455	2.48595	8.66635	4.51039	3.91875	2.18993	1.16468	10.8758	3.93994	9.31249	8.88762	4.55335	23.2496	-0.13251	8.44301	6.28448	3.32273	5.38543
29.8	1.78278	-3.1191	3.3525	9.41905	8.95534	3.53135	-3.30141	1.64304	8.35552	7.7874	10.3859	8.41334	1.07899	17.9582	-0.2302	9.0832	3.63894	1.37408	3.6747
29.9	3.18306	-4.22769	4.0862	8.75838	13.446	2.20812	4.35046	2.20514	12.1678	9.42453	7.66111	11.5764	1.33317	17.2554	-0.0475	6.04575	2.15661	0.863515	4.49867
30	0.898322	-1.18963	1.09012	10.5422	8.44638	3.41375	-1.43733	-1.07285	12.0922	10.1272	10.4937	0.666388	2.44094	20.1773	2.14441	5.9582	3.58471	7.07764	6.35931
30.1	2.64663	-2.40196	1.06374	7.19112	3.36998	2.10666	0.730202	-5.90685	12.8632	13.9291	6.79944	2.27692	3.18699	20.8527	-0.13854	9.35931	2.21341	1.88011	10.0912
30.2	0.250133	-2.44218	3.32707	9.68442	8.4923	6.02912	3.47472	0.148213	9.76674	23.6825	3.3228	1.73602	0.115064	17.551	-0.86098	10.0359	7.23377	8.91727	6.59803
30.3	3.22724	-3.59703	3.28406	9.15025	9.10719	3.47484	-0.17184	-1.8813	11.5933	20.9835	6.20919	0.984655	1.52659	16.6668	-0.14811	9.12235	7.56983	8.99817	3.88632
30.4	0.74314	-7.28678	2.24744	9.81972	8.35117	3.24481	-1.12012	-0.93039	9.90215	15.2441	4.01386	6.48864	-0.63794	22.6308	-1.70296	8.6622	5.55882	4.15121	7.69268
30.5	1.25433	-2.96015	3.1354	8.11943	-1.77576	3.9199	-2.36779	-2.49504	14.034	16.9082	1.74368	3.85579	-2.39416	17.987	-0.16127	3.24582	5.5165	9.41234	4.25504
30.6	0.440797	-5.54578	3.35714	10.6007	3.50164	1.18016	0.289108	-0.3385	10.7686	8.34501	5.12621	8.45596	-3.35309	17.877	-0.37327	8.63655	4.54551	6.42816	7.99724
30.7	1.33129	-6.17285	3.24448	8.72929	9.33467	2.87071	-1.96939	-2.55909	11.86	13.691	12.4223	6.70022	3.55437	18.0447	-2.54767	9.64772	6.0209	9.21163	6.11029
30.8	2.75406	-5.90757	4.46224	8.54624	3.44383	6.74115	-2.99606	-2.00135	12.2337	15.2916	11.3017	9.56231	-1.30775	23.9179	6.84305	4.85158	3.72082	0.283176	8.88342
30.9	0.13606	-7.5899	1.83386	8.6187	4.7044	3.84537	4.81368	-2.26472	14.7189	5.25472	16.09	6.741	-1.80755	20.7698	1.74606	5.60582	3.90756	4.85574	3.88152
31	2.04054	-5.0651	2.09216	7.05875	2.66209	5.29219	2.54337	-0.73026	14.614	14.094	5.52699	7.68153	0.961649	27.6344	1.9459	9.38164	6.26792	7.33111	5.80703
31.1	4.97958	-5.3985	2.70208	5.46315	3.21235	6.34555	-1.69984	-2.25154	13.0824	7.6229	2.38276	5.44308	2.24671	17.5202	-5.96567	11.8895	7.08168	11.4836	5.00634
31.2	2.33067	-5.83374	0.975916	6.45606	9.34803	1.16488	4.11374	-2.45383	10.1554	16.0102	10.2585	7.50419	2.83074	18.6814	-1.81123	8.15363	3.80007	4.31846	5.91403
31.3	1.36479	-6.42675	3.8516	8.78005	6.07469	2.2768	4.84941	-0.50468	13.6438	19.7625	6.55033	3.87189	1.05233	17.6105	-1.3951	9.10832	3.27094	0.203467	5.22095
31.4	2.13816	-6.51094	2.95945	8.93713	2.26612	3.61758	-5.11127	-1.73178	11.6273	11.2479	10.6718	4.44834	0.051898	15.5359	-2.03367	11.3833	4.44804	7.95841	2.7403
31.5	2.21325	-3.03173	3.07364	7.45396	-0.10878	2.06645	4.28658	-3.5005	16.4887	14.1666	0.572214	2.94682	-2.12332	15.5199	-5.25564	7.83371	2.592	15.7742	3.84521
31.6	1.17599	-2.38418	2.84104	9.04466	5.52159	-0.72241	6.75688	-1.68471	14.5548	18.3683	4.76326	7.27806	6.08788	14.5739	-5.45288	8.1386	3.97437	11.8297	9.62125
31.7	2.02183	-1.54303	2.37164	9.12576	9.28819	0.62057	5.38566	3.36419	11.938	12.4185	9.58743	7.64302	8.448	11.2791	-3.95068	10.3599	5.15946	5.02885	8.36958
31.8	0.939627	-8.77651	-0.78648	6.61549	-1.81734	5.33387	7.00287	-2.03082	14.133	11.3719	6.79727	2.89406	0.735848	17.0349	-5.13836	9.75417	4.61839	8.37813	10.5784
31.9	0.656951	-3.58861	2.07659	3.55994	5.26355	-0.43229	6.3191	-5.63119	12.509	19.1326	10.8486	9.00537	5.45592	9.59943	-6.98209	9.08577	0.99969	3.83774	6.79326
32	3.02434	-4.39485	2.19373	4.96218	1.10518	1.35234	-5.54132	-3.45326	13.8223	13.0427	5.65997	1.90664	3.50823	14.9083	-4.75994	10.9308	4.51163	4.42246	6.63886
32.1	3.10618	-6.52524	2.15544	5.38218	0.320694	4.75537	-2.05924	-3.08945	15.6078	14.7369	5.6585	7.43694	4.13298	12.2419	-6.02915	10.5704	4.67403	2.65109	7.346
32.2	2.55143	-8.26863	2.75816	6.84471	7.33851	2.54019	-7.02442	-2.79302	12.1207	17.1936	1.55661	5.02883	1.33423	10.7128	-5.4805	7.47776	6.34708	6.35757	5.5232
32.3	2.8346	-5.2126	3.53227	5.82307	9.71953	0.4778	-1.51436	0.530461	15.7155	19.3097	3.55652	-1.49156	6.43571	12.2004	-4.19674	13.687	5.6843	-1.44483	8.12091
32.4	1.5	-3.13126	2.66559	7.17725	0.935936	-0.33411	-2.61191	0.31199	13.1556	13.7754	7.16571	8.41008	2.24285	15.4288	-2.7729	10.9261	2.51541	6.61331	4.55909
32.5	1.97397	-7.12023	2.99121	5.50269	3.33892	-0.47332	-1.54252	-2.28974	17.8865	14.3716	10.4875	3.19204	3.84015	7.08909	-2.80547	10.3856	4.54038	5.24829	0.757663
32.6	1.4697	-7.68276	2.49882	7.35994	0.648895	6.46412	-1.89581	-2.00081	14.2495	14.1399	5.71719	1.66871	3.70668	11.4711	-6.22969	6.75225	0.509456	3.13774	3.88806
32.7	0.519279	-6.69851	2.70865	7.5009	6.23043	2.51202	-0.7107	-1.49886	16.9769	15.3325	1.82258	0.71858	0.405178	13.1094	-13.0831	7.86154	3.75924	5.93726	6.28639
32.8	2.33777	-4.89621	3.58583	8.22929	-4.66925	0.456467	-3.92052	-4.66028	15.4394	14.4842	5.04108	5.24563	0.726685	12.1552	-7.74159	6.2834	5.48371	9.71815	5.09214
32.9	1.08714	-6.68177	3.38556	7.11217	11.3817	2.29838	-6.68006	-2.4885	21.9242	9.96592	10.8742	6.04092	5.09473	13.0192	-8.03301	6.94482	4.02568	-1.36021	3.80617
33	1.30931	0.633193	2.30257	5.9462	8.43839	1.92132	-6.39274	-0.862	15.609	10.76	8.44703	8.2387	3.46267	12.7338	-4.53012	7.30093	2.64813	-4.59782	5.11344
33.1	2.62969	-6.18724	4.90293	6.8047	4.43825	3.3239	-4.62889	-2.38256	20.9244	20.3158	5.92639	7.05438	1.80324	11.7581	-5.9603	8.42495	3.08557	10.9716	2.75761
33.2	2.28111	-6.40413	2.23371	8.729	2.48728	2.19448	0.972289	-3.77267	17.2498	19.1102	8.96406	1.40752	4.12421	12.649	-3.95494	7.03048	0.717404	7.81666	7.89673
33.3	1.65258	-4.86022	2.90242	4.65073	7.84367	2.12585	-0.62345	-0.48588	12.788	18.865	2.04833	6.59374	1.58504	15.5447	-6.67323	8.44255	2.99349	6.89474	4.79932
33.4	2.98035	-6.53071	1.6675	6.55826	-0.51066	4.18748	-6.93616	-1.93668	19.1526	20.2746	4.87955	5.09176	7.1493	15.1198	-5.57654	0.817053	4.03887	4.32332	5.33916
33.5	2.14185	-6.67106	4.54917	6.30352	3.76448	4.07056	-6.201	-2.69833	18.0321	20.4359	4.65406	-0.80985	3.93855	10.6526	-4.01361	9.88481	1.86905	8.36833	2.60122
33.6	2.38391	-8.28552	3.83708	10.6054	9.39737	1.63921	-5.88628	-0.2065	13.1773	21.6055	3.92451	5.32661	2.03045	15.1344	-1.94458	8.2126	-0.88959	2.31399	5.41468
33.7	1.4829	-5.97254	3.59068	6.39203	-0.5194	0.348668	-4.86695	-2.29778	19.1024	20.9117	0.397173	3.97783	5.8541	18.4235	1.51146	8.01854	-0.40426	6.10458	5.68702
33.8	0.682778	-4.32116	2.70228	9.01529	1.59962	2.66103	-2.8234	-1.85895	19.0798	20.3174	0.35752	5.10718	3.97755	18.0063	3.26582	4.69919	2.15583	8.52423	5.1439
33.9	-0.71671	-5.1056	1.07129	7.34331	3.73702	2.34439	0.732943	-2.42533	14.4472	19.9936	5.24902	9.84784	2.43481	9.92825	3.83092	10.7938	-1.62318	7.67212	4.19629
34	-1.82522	-4.59401	1.13287	6.38297	-2.27198	-0.3405	-5.29492	-3.33938	19.568	19.6992	4.12083	13.711	-1.30687	5.42568	-5.74238	7.15983	2.61816	3.08655	0.518595
34.1	-1.51286	-8.49981	5.25595	8.15347	-0.50446	-0.10802	-4.83819	-4.10331	18.752	17.0966	9.866	5.29001	5.09999	11.0855	-8.68297	7.52169	1.4533	8.63051	2.09665
34.2	-0.40455	-7.04859	5.23901	8.41447	7.52357	-4.20598	-2.32206	-4.64276	15.8336	19.748	2.76591	4.99227	1.1958	7.97711	-4.60353	5.67431	6.22031	1.97153	2.00166
34.3	0.263519	-6.659	1.72237	7.00696	5.05939	0.57588	-4.89432	-2.41416	20.3605	9.87333	10.0664	2.18355	4.17622	12.3881	-2.65777	6.79293	4.40369	10.36	8.76238
34.4	-0.40061	-8.39994	4.93968	7.96575	7.88649	4.0237	-0.42212	-6.26602	21.5212	19.8629	5.2502	5.80985	0.542419	7.19609	-3.08736	5.06836	4.09311	7.4989	8.35489
34.5	3.57536	-3.79328	6.02437	6.7435	-7.2032	-1.53667	1.57276	-2.56579	17.9021	17.7255	2.13241	7.95048	-1.04774	15.5983	-6.44063	14.1844	3.89232	4.76741	5.26632
34.6	2.42375	-6.68554	3.37798	6.09602	4.23692	-1.54303	5.88968	-3.04504	20.8788	13.0034	6.20698	-3.31103	1.98598	9.70371	-6.13763	4.82942	3.2939	5.32322	6.91549
34.7	0.955912	-4.57928	2.34373	4.66159	6.25529	1.50185	-0.01188	-4.13912	20.1737	8.61212	5.51271	5.67063	-1.12374	16.75	-5.12759	8.19553	3.26776	5.41291	6.80351
34.8	1.8501	-3.1601	6.49223	3.38019	5.95999	-0.33719	3.31742	-4.67673	20.4377	18.7549	7.69953	-3.63419	0.837151	17.1871	-7.56432	10.5307	4.1171	10.881	4.67104
34.9	1.91071	-5.73832	5.03233	4.85381	7.70433	1.86272	-3.37825	-3.01258	18.8473	17.1835	7.38473	3.59446	-1.68573	14.1127	-6.54025	2.26044	4.61633	13.5968	4.31644
35	0.85589	-5.30723	4.32164	3.65825	0.982426	-0.61949	-2.34219	-5.84437	17.3811	10.9128	12.1808	1.41792	-0.12953	8.50892	-5.28675	9.21833	5.20854	0.474528	6.32988
35.1	1.47079	-3.25033	2.1558	4.09687	4.07182	0.476957	-4.03668	-2.93112	17.2369	13.7586	-0.62084	4.51299	4.035	11.3144	-8.70732	4.71722	5.05589	11.1291	11.2807
35.2	2.2711	-5.38869	5.08633	3.94946	5.66816	2.10295	-2.69776	-2.86381	19.157	16.1741	8.43037	5.28452	3.10691	8.71138	-8.96732	6.1237	4.53335	5.61723	4.11181
35.3	0.452449	-4.90631	5.41318	2.97957	10.0237	1.01054	-3.85094	-4.48464	14.0493	16.7954	6.92124	6.45055	1.65881	11.0831	-17.1684	2.90258	2.57973	5.20774	4.30193
35.4	-0.39014	-8.36127	3.35082	1.71863	-3.09766	1.90601	-7.74286	-3.58676	16.3598	17.38	2.61325	9.28198	3.12408	8.84027	-13.7511	9.03952	5.2741	10.0054	4.58731
35.5	-0.538	-7.43901	3.56384	3.28853	0.964622	3.42422	2.96061	-0.65152	15.7466	12.4522	11.2973	10.0198	1.19411	7.45672	-10.993	5.84949	3.72613	2.49267	0.272945
35.6	-1.97253	-6.24727	4.99602	-1.77113	4.30379	0.658155	-3.23404	-4.52594	21.3082	20.4389	3.02924	-0.37069	2.59835	6.54026	-5.57408	10.8131	2.60101	9.20142	2.99749
35.7	-0.79655	-5.86627	4.71377	2.45199	6.2666	2.13014	2.54877	-5.15497	16.5447	15.6331	3.26389	6.90916	3.6584	13.5951	-2.27344	5.95542	1.90872	6.80696	0.962422
35.8	0.320856	-4.74873	3.6641	4.00032	5.46393	-0.39694	-2.56018	-2.51302	19.6063	10.582	2.88442	1.26968	2.5662	17.866	-8.53938	3.84681	0.422603	7.18051	6.08466
35.9	-0.40091	-6.63341	2.05313	1.86184	6.52668	-1.29018	-6.97265	-3.86364	17.2225	8.21647	8.54519	2.23328	10.4289	11.3854	-5.24478	8.2542	-0.11624	8.92056	1.02482
36	-0.18299	-4.70014	0.896091	4.15742	3.86119	-1.62592	2.57385	-2.39763	17.7652	17.3689	5.85371	3.58607	2.34031	10.369	-5.81974	7.24572	2.74462	0.655141	6.64904
36.1	-1.7604	-6.01611	2.5548	4.21762	5.29233	0.9131	-2.37154	-3.62808	18.6979	20.1528	8.68522	4.4472	5.61202	11.2849	-7.8472	3.36274	5.37072	4.26513	2.58678
36.2	1.44091	-2.03482	3.67505	3.84698	-0.2333	0.969995	2.80144	-3.19167	17.1482	16.1649	6.85208	2.10791	0.513232	10.6868	-3.43239	11.8944	8.84237	7.31347	6.91195
36.3	-1.33283	-4.97227	-0.38827	2.36892	13.653	0.502066	2.80824	-5.73841	20.7069	15.8861	6.02078	5.1645	7.08596	5.34256	-8.90909	4.42972	-9.20517	6.57211	4.83175
36.4	-1.37291	-6.93916	0.537867	0.743714	4.45294	-0.94672	-4.88362	-5.22999	18.2085	18.1649	4.61064	6.47711	-1.23541	12.7957	-8.03635	7.35194	-0.85684	10.8691	2.08204
36.5	-2.48974	-3.94567	2.97991	2.25262	10.589	1.04818	3.02556	-3.28771	15.9407	13.5136	7.83756	7.76545	0.016239	13.0333	-1.13964	8.54238	-2.47079	9.13165	0.369512
36.6	-1.74979	-4.73946	2.10472	2.59456	10.0548	-0.73834	-3.07666	0.368747	17.8573	18.216	4.05208	4.27412	1.03823	12.8144	-8.89674	11.3791	-2.71304	0.344887	3.42238
36.7	-1.1711	-8.15936	0.846527	4.5176	9.10252	1.4785	-0.91051	-2.37343	18.5957	16.1216	8.53531	5.8312	3.28707	9.64757	-10.779	8.02957	-5.83795	11.7835	3.94095
36.8	-0.63423	-3.95043	1.5744	5.17252	5.09596	-0.22984	-4.18461	-6.92654	12.9326	17.7535	2.4765	4.71104	5.55114	8.28275	-7.30733	12.1356	-3.21445	3.4926	1.66829
36.9	0.957468	-7.48992	3.96125	5.51892	0.508246	1.39387	-1.70185	-6.561	17.8237	14.5027	7.80788	6.9725	6.01826	7.42605	-8.21178	6.72745	-2.59295	4.87159	3.60337
37	-0.77762	-6.54039	0.91254	5.81288	3.04297	-0.52537	0.029616	-2.47966	19.797	16.3048	3.68892	7.63228	5.86277	13.999	-9.7347	5.16337	-2.10391	5.06929	6.69751
37.1	-1.14199	-5.68755	1.54029	5.26937	2.46529	2.00208	-5.00603	-1.79618	16.4884	19.4421	7.93994	6.74788	6.17942	8.82973	-10.5153	9.68875	-6.85401	10.4698	3.2772
37.2	1.84762	-6.02203	3.37192	6.08599	6.42507	1.20557	-7.98762	-3.18274	19.5775	10.9793	4.4771	6.91899	6.87289	12.0773	-9.92866	7.08133	-6.59613	2.52817	2.89384
37.3	0.422521	-6.76599	4.27551	2.62956	3.49994	1.1147	-6.17908	-2.08759	20.7116	19.9377	-0.87398	5.17111	4.22411	11.0933	-6.82306	3.26419	-3.19467	13.2229	1.53686
37.4	-0.36228	-6.48342	2.61398	6.36495	-3.41653	-2.13244	1.64482	-5.12472	17.6295	15.6899	11.3164	-1.10491	1.78051	8.71393	-2.26596	7.94995	-3.44635	2.26717	1.14036
37.5	1.30514	-5.77028	1.98345	1.94485	0.840664	-2.81911	-8.19476	-4.84693	16.3453	16.2088	7.95011	4.15722	-2.89507	9.43574	-3.68869	9.50388	0.89561	6.93967	2.54588
37.6	-0.50899	-9.1452	3.15287	3.03254	7.26366	-3.68439	-7.60398	-7.2359	16.5496	15.9952	9.8318	8.6461	6.70633	9.43623	-6.82896	6.93017	-2.10223	6.98728	2.12076
37.7	-0.70821	-6.10638	5.28942	2.74954	9.34026	1.15084	1.28611	-5.89236	17.0582	18.6719	0.539745	6.78212	3.39293	13.6416	-9.6503	4.21056	2.69871	6.40132	7.46148
37.8	-1.11789	-8.78185	5.64582	3.7703	-3.5165	-1.15891	-3.94729	-3.5448	15.3714	17.4451	8.67403	5.83955	7.37434	13.2397	-6.29519	5.48559	9.39576	15.9631	4.22356
37.9	-1.0312	-4.95321	3.23248	2.17622	8.40671	-0.6046	3.52594	-2.37553	18.0318	14.2416	11.2942	6.48924	5.06511	13.7609	-11.0845	7.4668	0.667073	7.43323	0.151403
38	-0.36415	-9.41724	4.86047	2.74193	-4.40209	-1.95871	2.73484	-5.85473	20.9941	14.2618	3.12788	4.95329	4.4446	11.9709	-6.84344	6.00678	1.94662	8.46623	0.926028
38.1	-1.15235	-5.78652	3.16421	3.73367	5.76944	-0.14849	-2.71589	-2.85031	15.5593	17.0819	4.60125	-9.5794	-0.75271	13.8153	-10.2986	7.10599	0.830758	8.24091	1.80607
38.2	-0.2807	-7.06137	2.05309	2.63706	-3.40553	-2.39766	-4.83827	-5.68751	13.777	19.034	1.11853	-0.76729	5.92809	11.6279	-7.13139	5.1453	-1.07441	5.96712	5.51924
38.3	-2.69923	-6.39021	2.09078	5.62165	3.96997	-0.49731	-5.95738	-3.84674	16.15	16.0445	7.50893	0.43652	2.21971	10.776	-8.79156	9.6151	1.46944	10.036	7.25846
38.4	0.038869	-7.75276	2.16321	4.02805	5.82629	-2.09354	-3.97068	-3.6383	18.1854	13.1342	4.68943	4.59783	2.96516	10.8642	-5.73956	1.24255	2.79855	6.85122	5.2079
38.5	-0.34736	-6.07319	4.58129	4.61375	1.90793	-0.94944	-4.54647	-7.1042	21.4721	12.3646	9.61796	1.11153	1.4068	8.74383	-7.79658	3.23509	-1.0715	7.70043	6.1346
38.6	0.019713	-5.53682	4.31096	3.3687	-3.344	-1.84239	-4.13824	-5.10997	17.0875	13.1225	7.26753	5.52979	-1.54151	15.1194	-12.4579	5.30606	0.408701	3.85489	3.53384
38.7	1.11644	-7.6955	3.42933	4.64802	8.78542	-2.49265	-0.37248	-2.04194	17.0879	22.9296	4.02314	0.068681	5.09357	14.3936	-7.03388	9.82567	-0.98231	2.53856	2.12338
38.8	-0.58084	-9.44462	1.11987	3.40879	-5.39272	-4.89081	-3.26483	-4.0844	13.3858	15.8582	11.0198	3.38495	1.40453	11.5763	-12.5868	9.37698	-3.72962	11.4522	3.78363
38.9	-0.61726	-6.99964	3.64366	4.43003	5.73729	-1.77205	-1.03669	-3.56004	14.3267	17.6301	2.49485	-2.49193	-0.34654	15.6227	-10.2371	7.8089	-2.851	3.50922	0.806839
39	0.445668	-7.50762	2.394	0.611658	1.39256	-2.15458	-1.76599	-1.65082	14.5708	12.7449	4.84968	-5.54568	3.3442	14.7956	-11.4535	6.09181	-1.13268	3.73188	2.99447
39.1	-1.26924	-6.84561	1.97029	-1.23525	-1.33736	-1.09825	-5.28814	-2.21006	14.9157	16.8589	3.53342	-4.58071	4.21167	15.2247	-8.37253	5.7768	-0.46495	3.55867	4.71875
39.2	0.041343	-7.56409	2.05162	2.38179	3.15079	-1.60939	-6.89171	-2.71241	14.487	18.8904	4.61151	2.5913	11.4421	14.6367	-5.60707	7.12172	-0.14301	4.172	4.46962
39.3	-0.03771	-7.04607	1.19321	3.354	4.25445	-1.56841	-5.34446	-3.93262	18.4811	21.9621	4.24367	1.03738	8.22274	14.6597	-7.79668	7.89526	0.695199	5.99689	3.16557
39.4	0.053376	-7.61906	5.48568	4.72505	6.60854	-1.64103	-5.53734	-6.56541	15.2553	14.584	-2.07675	-6.19314	1.42103	14.3726	-5.67303	8.41881	2.04698	1.2812	3.60198
39.5	-0.46075	-3.59862	6.18173	4.42923	2.54863	-0.0711	2.45405	-3.26125	18.1344	14.6049	8.79739	2.39477	1.83761	16.3601	-4.94193	4.8127	-1.35874	4.75216	4.36596
39.6	-0.60857	-9.06347	4.03322	5.13407	0.581133	0.097914	-7.13423	-5.68222	13.4329	16.0479	5.13286	3.7526	3.72987	16.0392	-10.4468	6.26151	-0.50459	4.20579	5.27835
39.7	0.023134	-7.01645	3.42902	5.25816	-2.32669	-1.91797	-4.18939	-4.7666	14.7226	12.1687	5.41865	-0.31534	5.63955	14.8206	-5.34349	8.54764	1.45878	7.11708	6.99179
39.8	-0.52214	-7.5989	4.50386	4.2318	0.211009	-0.3437	-2.37288	-4.39907	17.7851	17.6141	-6.5659	-2.80172	0.936893	14.7242	-5.18184	6.26936	-1.25295	3.40178	4.25445
39.9	-0.67828	-8.64613	4.21297	2.04333	3.61499	-2.15702	-2.70125	-6.06151	14.0651	11.3359	6.62504	-2.49052	4.64998	15.0363	-7.15889	7.5536	0.466697	8.41561	3.60117
40	0.297592	-8.33781	3.63548	3.47088	2.09916	-2.1146	-1.31269	-6.85827	14.3265	11.5116	3.95016	2.7263	6.18888	13.9062	-7.46764	4.56356	1.07055	3.68052	4.22044
40.1	-1.21625	-11.1609	4.37135	3.68491	1.72394	-2.63894	-4.35471	-5.91659	14.5672	17.3985	-2.47321	-0.42499	-2.20718	15.1411	-9.76013	6.93059	0.004222	14.0771	0.225487
40.2	-1.89377	-5.62412	1.36872	2.59811	4.73252	0.667085	-7.51087	-2.27721	13.7953	14.5216	0.695713	-5.21157	7.67621	15.2152	-12.1878	7.67141	-2.34621	12.7871	5.91396
40.3	-1.18347	-6.76376	2.63276	0.286183	-1.41429	-1.75371	0.564528	-7.94365	16.447	12.4489	5.21241	-6.10062	1.18866	17.5005	-12.4957	6.02709	2.77677	4.14549	0.266209
40.4	-1.62451	-4.24984	2.00237	0.23643	2.5089	-4.89072	-4.46002	-5.30408	16.3561	12.4568	15.8689	1.34212	4.16185	19.9377	-6.89494	6.32699	0.480254	8.16656	-0.89129
40.5	-2.25438	-6.93847	3.97194	2.82397	4.00117	-4.54212	-4.12636	-3.92704	15.1648	13.4345	9.79287	-6.26101	4.51377	20.5002	-8.36043	4.66458	0.591687	4.45294	4.93802
40.6	-0.96804	-3.51943	3.03153	1.88535	1.56396	-1.94091	-4.13213	-4.37057	18.1451	12.8665	7.11461	1.97838	3.07402	14.0432	-11.4495	7.95506	2.91361	4.11117	3.37878
40.7	-0.62827	-7.51065	2.24207	-0.08311	7.78491	1.02439	-3.11786	-5.80309	15.6141	13.353	-0.79927	-5.96826	4.57212	15.7394	-10.0021	4.95359	0.024964	6.75391	-1.5972
40.8	0.043776	-5.77424	3.81586	2.12965	7.0671	-2.65028	-4.88345	-3.49113	11.2519	12.896	4.26159	-3.05006	6.93977	15.2255	-4.28034	3.62277	-0.70527	11.4454	4.13777
40.9	1.78414	-6.7596	1.06196	-1.62355	8.13734	1.08266	-0.90714	-6.50184	12.1158	13.2499	2.76694	-6.25661	1.02212	15.1683	-8.8221	6.71629	0.280934	11.8588	3.14466
41	2.09117	-3.70207	3.21829	3.3766	-2.15559	-3.01372	-8.79369	-7.66137	12.0869	10.9929	3.32926	-9.8679	4.14438	15.218	-9.57366	8.60112	-0.62311	8.74861	5.91319
41.1	-1.71651	-3.6654	3.88538	-4.67825	3.69551	-2.02027	-4.45978	-5.02728	20.7771	12.4722	9.31517	-3.39399	0.273385	11.6158	-10.6513	7.09197	3.45939	10.2909	1.79903
41.2	1.38196	-2.20555	3.73116	0.916932	3.84357	-1.74903	-4.51584	-5.35421	18.6749	12.93	2.92737	-8.16379	0.011316	15.1877	-3.87784	3.24933	1.76416	9.31756	-1.77397
41.3	-0.25265	-2.57048	2.67307	4.02469	5.33841	-1.56346	-7.51631	-2.23706	14.4276	11.0662	9.03651	0.912198	4.50905	22.1009	1.6	6.46077	2.12679	11.0479	0.688881
41.4	-0.67055	-3.23117	5.09268	1.98445	4.69081	-3.6013	-7.17321	-4.33594	13.6094	10.3267	-1.43015	-6.27144	5.65142	20.6377	-5.35255	12.0146	3.89768	6.68388	4.31627
41.5	0.017331	-3.70423	3.12825	3.31206	-0.75698	-1.23758	-4.49728	-4.10313	14.0504	9.60796	9.70326	-5.43334	7.23003	16.3875	-5.82609	4.18677	-0.1962	10.1076	5.03346
41.6	-1.4971	-5.73956	2.86302	2.45586	0.715249	0.08425	-4.74379	-5.08556	13.0692	9.25594	9.45255	-1.68488	6.76331	17.1106	-6.35431	1.83603	3.29052	13.3078	5.75956
41.7	1.01273	-3.80941	2.64394	2.96291	0.17408	-0.30947	-7.38491	-4.77618	13.7516	7.58266	3.20983	-0.82984	3.79461	19.4044	-7.53427	6.06706	7.17035	4.588	0.968577
41.8	1.28034	-4.83175	5.84722	4.3261	4.45492	-2.91456	-7.09777	-6.73587	18.0046	4.58373	-2.36492	-8.70988	7.99407	20.2306	-6.04101	3.62685	4.8288	4.06116	2.99431
41.9	0.092228	-4.551	5.56116	4.01076	5.9399	-3.16975	-0.42897	-4.29883	12.8892	19.4222	3.47981	-4.53258	7.32453	17.7974	-3.42305	7.64468	1.86414	11.3679	1.42368
42	0.706416	-4.36491	3.0747	-0.45869	9.68521	-4.05792	-3.66966	-8.1165	17.9131	15.0852	3.48331	-7.17926	7.18843	20.2494	-3.51229	4.25994	2.91699	5.39082	4.95036
42.1	-1.227	-4.11205	2.72089	4.73084	2.80764	-8.07449	3.20864	-6.59237	16.9984	10.8064	6.5822	-9.97936	5.91357	19.8461	-5.32423	9.06034	1.83344	5.14211	6.90483
42.2	-0.2823	-3.87815	1.6784	1.36614	7.18721	-6.78882	-8.68853	-0.54371	13.5514	8.69655	4.41902	-3.049	7.63156	21.2094	1.37873	3.77318	2.26922	10.1017	2.69477
42.3	-0.76928	-4.557	2.79418	3.24895	4.06647	-3.56427	-6.19085	-8.17561	15.4043	12.5068	9.86252	2.02462	6.17375	19.9362	-2.35095	7.85983	2.63973	6.1481	1.32885
42.4	-0.82672	-4.42902	3.83446	2.67768	4.00455	-3.39541	-5.87254	-3.72809	17.4448	11.9525	3.44486	3.05748	10.2277	18.8421	-3.10529	2.50556	-1.30757	5.09773	3.01763
42.5	1.67172	-3.579	3.84311	3.71389	15.0311	-3.79186	-8.5739	-3.51452	15.1378	5.03459	3.11172	-2.82632	2.80416	15.3403	-10.1629	8.23755	6.76615	3.32825	2.55464
42.6	-0.56724	-1.60922	3.14032	1.04495	8.7856	-4.81508	-6.84661	-7.16105	17.7216	10.1176	2.44314	-2.06918	5.67901	18.2857	-5.76727	9.38515	3.56126	6.85163	7.24182
42.7	0.593984	-6.10179	3.20808	-1.70689	-0.89001	-2.03927	-5.92002	-7.21294	13.4809	11.223	3.4486	1.68621	2.86406	19.9266	-8.18733	10.0127	2.38688	11.7475	4.90192
42.8	2.03334	-5.2554	3.85382	1.68761	7.04485	-3.19306	-7.58231	-7.10871	14.7096	11.118	5.31131	1.43217	1.358	14.5235	-6.84624	9.88871	1.72048	2.82597	3.66421
42.9	0.190663	-8.1039	2.84367	1.60036	-0.83406	-3.81522	-10.4845	-9.45342	16.613	14.6753	3.26455	-5.86562	1.12388	18.0983	-4.29398	2.7387	6.00074	1.56068	2.31529
43	2.14834	-3.90055	1.96757	-0.25363	3.47338	-13.489	-7.9792	-6.18451	15.0156	10.6686	7.98093	-2.12342	-3.84639	18.9674	-5.82043	13.2107	0.045986	3.6175	5.30442
43.1	1.38551	-5.872	4.61957	1.82012	8.81411	-7.51722	-2.60303	-3.76902	13.5687	10.0231	0.598902	-1.98013	4.86383	16.4499	-7.78362	2.80439	-2.95399	4.6329	-0.48993
43.2	1.15228	-5.15619	7.15069	0.763194	-0.5587	-7.38715	-4.69362	-8.71408	14.1589	12.3409	2.40584	1.31079	6.68829	11.1715	-6.35805	3.42071	0.421711	2.88489	4.80972
43.3	0.092578	-3.18593	5.65298	2.18488	5.78346	-10.6737	-3.62686	-2.59072	15.5531	17.7576	5.45485	3.224	8.75425	18.1231	-9.89794	11.0174	1.3937	6.39698	4.94833
43.4	2.32259	-5.71145	4.01554	1.73428	2.95508	-8.98889	-5.26671	-5.66998	13.4547	10.1297	5.51905	-0.83951	-0.07972	14.4558	-5.4169	4.4589	2.12131	2.64185	7.51991
43.5	-1.26554	-6.6024	6.42968	0.699194	10.0283	-9.23598	-3.04726	-7.97973	13.8544	6.70944	6.82167	4.96659	5.16725	16.4841	-9.39911	3.56535	6.86414	3.81413	5.80628
43.6	0.313974	-6.26613	3.51671	1.07484	12.3454	-9.06806	-7.29166	-5.75528	14.363	10.8338	7.11867	-0.592	11.6648	13.0437	-6.63339	15.4971	2.76908	4.09056	-3.19716
43.7	0.498662	-4.04809	2.93175	0.617257	6.94526	-5.129	-5.46198	-6.40805	12.2139	15.082	12.7177	2.83446	3.77292	14.5863	-4.73504	5.38698	-0.15635	3.61829	5.43829
43.8	-2.10011	-2.27213	5.02507	2.45069	3.90739	-2.71922	-2.21931	-5.92271	15.5063	13.7364	-0.14723	-2.92133	1.70917	22.9751	-8.38143	9.04241	2.01256	9.29834	1.65311
43.9	-0.39216	-9.7017	4.21061	2.09105	7.57718	-8.46087	3.59204	-5.2693	14.2992	14.7182	7.81377	-5.3198	9.06452	14.9173	-7.89113	6.03799	3.94049	5.55669	2.06845
44	1.41731	-4.04281	5.57589	0.523983	5.22092	-5.1004	-4.56184	-6.66954	14.8442	14.3536	-0.6802	-1.24519	2.10289	14.2581	-4.28025	6.83571	7.49151	10.7326	9.86382
44.1	-1.47823	-5.07789	5.01545	2.795	1.08937	-6.2055	-8.06656	-6.0583	16.6524	10.9764	2.43638	-1.79044	2.14377	19.3847	1.15397	1.68352	0.216767	9.94168	1.35844
44.2	-2.28615	-4.81597	4.2524	1.09595	11.4054	-5.36279	-7.30393	-6.91991	18.7793	10.1697	5.55797	5.28977	1.30747	16.6426	1.13177	6.88316	3.04384	3.922	-0.33608
44.3	0.30695	-7.46759	2.44585	-0.91603	8.46663	-4.90594	0.776912	-2.04055	14.2236	12.9106	9.48305	6.81762	1.35656	12.1676	1.64242	4.5087	5.39799	6.77153	3.42819
44.4	0.964387	-8.45247	3.30465	1.6344	3.35799	-4.66639	-7.52255	-5.93569	14.0957	14.3424	4.21806	5.18317	1.81836	11.9984	1.20747	8.45045	4.44308	8.36251	5.25208
44.5	1.33055	-6.56102	4.37974	0.147128	-3.27759	-5.45131	-5.46415	-4.88494	13.2496	11.3034	5.5881	7.83172	3.67665	16.17	1.04528	7.14483	3.16373	7.14305	10.4059
44.6	2.20526	-6.6909	2.90655	-0.07008	1.45113	-5.96565	-5.0021	-7.94477	14.7319	10.4624	2.12732	3.75711	2.85184	14.4856	-2.86447	10.6909	2.87248	9.67311	6.01408
44.7	1.74956	-8.93778	3.53881	-1.67305	0.16686	-5.5208	0.01959	-5.42548	15.7228	13.0708	-1.4983	4.87888	-1.35046	17.273	-2.1609	7.01959	2.66359	5.01489	-1.82683
44.8	0.115535	-5.97684	5.67488	0.752101	4.46707	-5.91153	-4.8547	-5.0578	11.9246	11.7464	-1.2431	8.56192	4.26088	19.2508	2.24387	4.43177	0.595205	4.25199	2.96114
44.9	2.13164	-5.17159	4.10854	0.147124	-0.24724	-3.66615	-11.3706	-7.50372	15.2557	11.2406	6.36229	9.10151	5.08524	18.6133	3.05688	5.51898	2.08884	4.77126	-0.16661
45	2.56275	-9.16991	5.12573	-3.6633	5.01493	-5.78427	-6.62665	-5.71631	15.1563	13.3448	-5.26998	4.6668	5.87831	15.3249	-7.75505	6.30915	0.488849	5.7522	4.18677
45.1	1.52576	-6.12799	4.63908	-1.63261	7.62556	-4.65203	-6.21038	-4.88756	13.2984	15.6514	-2.57461	1.15073	3.62849	15.583	-12.4946	6.18078	-1.76145	9.37403	3.47683
45.2	-1.68096	-3.10692	2.43335	-1.94028	1.58035	-6.10041	1.3116	-8.44336	12.8874	17.933	5.54989	0.259884	8.09902	7.20401	-14.9017	7.41447	3.40288	5.55084	6.67406
45.3	1.57804	-4.60411	2.55504	-0.16673	4.41288	-8.81046	-7.59389	-5.67392	13.0194	11.7518	2.6131	1.25068	3.24225	18.7917	-18.2442	10.4533	-0.71582	7.11819	2.30719
45.4	-0.80495	-8.82175	5.55498	-2.43518	7.63156	-12.6013	-5.66878	-5.50835	13.8704	15.0305	6.50325	1.7608	0.83994	15.8286	-8.88788	9.32411	0.048648	11.308	5.90211
45.5	2.2715	-5.23803	7.32365	1.34479	9.64363	-5.94498	-4.94188	-8.28534	7.88603	13.3981	1.68875	4.50193	-0.88305	15.462	-12.7729	7.6677	3.58345	5.08503	5.97088
45.6	1.28376	-7.53647	6.06033	0.521573	9.24441	-5.88728	3.11742	-6.93887	12.7135	15.827	-1.00238	4.70717	5.94785	10.3575	-14.6463	6.60456	1.66299	12.2907	6.81141
45.7	-1.15971	1.26612	3.21796	1.26087	12.0636	-6.85943	-5.81012	-5.19763	12.4877	14.2274	4.23495	-1.9145	5.42283	14.5191	-10.3897	8.77614	2.39199	6.85111	5.39852
45.8	-1.41242	0.691657	4.26988	2.80652	6.05971	-5.00388	-5.16731	-6.66797	12.1616	16.4066	2.85331	-0.70602	2.90412	13.4421	-10.1958	6.17389	3.76408	11.8541	1.4736
45.9	0.168292	-6.11212	4.4835	1.22458	10.4679	-8.55869	-6.54613	-7.12855	12.8395	15.6412	1.95146	0.192069	4.21547	13.4388	-10.9148	3.12602	1.99056	11.1606	3.71715
46	-1.36981	-7.83891	3.8326	1.57143	-0.82074	-8.26532	-2.38812	-6.09638	12.1854	14.6871	0.593152	1.68142	2.42588	12.3568	-12.1428	13.097	2.89396	15.9149	2.81297
46.1	-0.14911	-6.18019	4.03541	0.372041	6.0405	-6.93666	-5.36725	-9.73241	14.0767	11.1368	0.057475	2.86029	5.9017	14.5555	-15.3792	5.7597	2.78246	10.9205	4.32923
46.2	3.46779	-6.42823	5.36395	3.20898	7.42451	-11.1792	-2.56909	-5.17054	12.3678	7.11092	5.34955	3.43958	4.59646	12.5848	-13.3555	9.51359	2.3765	12.7573	2.42585
46.3	1.83053	-0.54146	4.53684	3.47281	2.00427	-5.5712	-4.04071	-6.73638	11.2508	12.8432	4.9823	1.28354	2.44398	20.7403	-14.6921	8.12501	3.98636	12.9611	5.23458
46.4	1.10442	-8.94898	3.12268	0.002346	8.42747	-6.7789	-4.78412	-5.96838	11.9498	15.9087	2.25265	-4.19354	10.9051	12.441	-7.14998	8.87102	4.71495	12.4261	5.13922
46.5	1.4063	-9.24027	7.74805	2.17503	5.75069	-5.19473	-3.19036	-8.54779	15.0276	21.041	9.6177	2.85191	4.89282	13.7427	-1.81443	-0.05929	1.2423	4.11238	6.69887
46.6	1.34322	-9.35101	3.10805	1.89626	1.3638	-8.34353	-1.65041	-6.85365	15.5116	17.6075	0.223301	6.31712	3.64254	9.10248	-3.71109	9.36478	2.42804	3.83513	6.71067
46.7	-0.63711	-7.26858	5.48646	0.201092	7.05111	-6.32327	-5.53736	-6.66728	15.7081	12.647	0.053269	-2.35795	4.31331	16.3321	-15.2969	1.72045	4.49676	10.5169	3.19787
46.8	2.12972	-5.86325	2.90165	-11.5398	7.22648	-8.01851	-2.39681	-6.59003	15.6872	19.0054	4.51979	3.60872	4.29907	11.0099	-10.7984	9.77132	0.369709	5.31114	0.996832
46.9	1.31549	-7.24263	3.62654	1.30638	8.89993	-8.18131	-6.25404	-8.59408	14.3068	16.6656	-1.59364	4.52883	7.65117	15.8335	-5.6048	2.86011	1.3516	7.04793	0.661005
47	0.061616	-10.1572	2.49707	1.59128	2.31473	-7.75711	-4.02358	-8.07335	14.5298	15.1426	1.02523	1.22593	5.07176	16.4211	-4.87452	8.40628	2.30262	10.6903	3.68378
47.1	-1.09519	-4.85542	5.58851	2.50883	3.24726	-6.29723	-6.95559	-7.05943	17.7999	14.4643	-0.02788	6.11234	3.48568	13.7846	-6.93156	8.64015	3.8632	6.60719	4.04537
47.2	0.229788	-6.89984	6.12963	-0.17039	10.3941	-3.63796	-5.15916	-8.38369	13.0549	12.1927	0.914372	2.73188	1.72921	14.5974	-9.91305	9.94681	4.40948	10.347	2.18262
47.3	1.1988	-7.47474	5.03813	-0.6458	-4.83691	-7.64544	-4.71256	-8.98087	17.1591	19.8421	4.13001	1.66114	5.86642	17.6323	-5.20977	5.62675	4.09991	7.62658	4.67429
47.4	3.22837	-11.1235	3.15056	2.07066	6.88968	-5.34104	-8.29734	-8.41475	15.8022	17.478	2.8055	4.04919	4.1639	16.0825	-9.35349	4.6753	3.05737	19.3211	3.55902
47.5	2.66132	-10.7596	2.78479	2.52192	16.3473	-4.85674	-8.03143	-5.56977	12.5118	16.2243	2.26513	0.994065	5.75726	16.2078	-12.3847	1.46778	2.32619	5.98118	5.68797
47.6	0.389138	-10.974	4.30453	4.55475	5.98511	-5.74858	-1.43467	-4.38068	9.72917	12.9036	0.441777	3.43874	-1.55599	21.2066	-8.2642	4.98333	1.30377	6.40269	4.2465
47.7	-0.38495	-11.6613	6.55836	1.73914	3.37211	-4.04691	-3.91586	-9.38614	11.6001	15.1329	1.98757	9.54983	6.20494	13.0174	-4.7519	8.99762	5.07305	3.29438	1.99112
47.8	1.00324	-6.77945	3.85721	1.9556	2.46913	-3.26193	-5.20167	-5.86966	16.2427	13.5226	5.71581	2.40376	5.99388	19.5378	-7.06634	8.05454	4.08116	4.86524	1.21213
47.9	0.983845	-8.69182	3.62291	0.534503	-2.54878	-1.79399	-5.01562	-7.90792	10.4935	14.7464	-4.57416	0.503875	2.09961	13.3455	-9.87643	6.63207	-0.51423	9.25718	1.47468
48	1.39856	-9.15496	5.01331	-0.0633	14.8745	-5.65147	-4.53942	-7.08568	13.5388	13.6666	5.92236	-11.1865	2.1546	17.6565	-8.00098	10.5251	5.82292	7.03039	4.37087
48.1	1.32931	-5.99471	2.58207	-0.29505	-0.39476	-5.82355	-5.03569	-5.55741	11.7124	8.53777	-3.14408	9.35063	7.22193	13.405	-6.94138	4.90712	5.30501	6.71686	0.302506
48.2	-0.48416	-5.52624	8.05793	0.629711	2.45785	-5.02629	-6.61486	-6.09169	9.46534	13.1258	-2.27067	2.24181	-0.75668	17.9715	-9.64398	3.83565	3.27384	8.44658	2.79586
48.3	0.413174	-7.01853	4.23162	4.5964	-2.86984	-3.39099	1.41135	-8.80867	15.0639	11.469	10.3563	0.975772	5.68566	12.554	-12.5619	7.97487	3.1602	6.01358	3.23199
48.4	2.62582	-5.40392	2.49017	1.80364	17.3327	-6.782	-6.36981	-9.06471	15.2282	11.7213	1.05324	-1.02343	3.07806	24.496	-4.17188	4.88251	4.51455	3.52598	2.55288
48.5	0.912982	-5.32797	7.48053	3.0862	4.35058	-4.97703	-12.85	-6.86656	14.6133	11.5212	1.79925	4.79876	0.83597	16.2797	-8.09622	3.67101	4.57204	5.20492	2.10651
48.6	3.64949	-8.38038	4.11702	1.54972	10.9928	-7.72011	-4.58265	-9.30965	12.5991	8.92742	1.95238	7.86244	3.5185	13.2568	-9.54627	6.6302	1.14493	13.1197	2.93841
48.7	2.9038	-4.96011	2.71666	0.613157	3.10127	-6.50803	-8.25743	-7.90491	10.8286	9.25501	6.37699	3.01341	1.46218	14.9292	-3.97813	6.04218	4.70656	7.45483	-3.53614
48.8	3.37036	-6.50638	3.78457	2.48325	1.00119	-7.36895	-8.75934	-7.27685	13.8711	11.5147	11.193	2.66854	6.97327	10.4494	-3.6851	5.9012	5.58453	2.26089	0.015532
48.9	0.457658	-6.3904	2.76634	0.115444	6.37532	-6.463	-4.34968	-7.42425	13.4217	8.82797	3.06836	10.1887	2.43131	12.4666	-7.87118	10.2544	12.1348	3.73128	1.68115
49	1.71071	-7.10817	4.5971	0.48413	0.124081	-5.84825	-13.0379	-8.68188	10.1203	5.90829	-1.71842	-1.57458	5.03161	19.7252	-7.88564	8.84111	9.18453	3.11658	4.29568
49.1	0.9968	-5.27453	3.89202	1.17292	0.891288	-9.04605	-7.51799	-9.7222	13.2253	12.5186	1.38701	6.8411	4.23588	13.135	-7.21368	4.24769	-0.29851	14.5241	-2.76584
49.2	1.34453	-7.221	3.1355	1.72122	11.593	-4.96575	-6.16209	-8.75379	12.9705	4.31348	-2.09021	7.70122	3.0292	12.68	-4.37418	5.12902	3.57831	5.77217	0.604676
49.3	-0.67858	-10.6563	5.6525	2.07916	6.42217	-3.70273	-12.4147	-8.8737	11.9175	10.9148	1.43012	5.79257	0.020085	12.1504	-4.93779	4.09577	3.56483	11.116	1.19184
49.4	1.53988	-4.85165	3.05058	0.969145	0.755987	-4.905	-9.93936	-7.83386	10.3573	9.75788	3.90856	1.9183	3.78236	13.9619	-4.59199	5.10283	5.74042	6.1557	0.881315
49.5	-0.21728	-7.30327	4.22886	-0.23757	2.60145	-5.40477	-8.75285	-9.31325	11.0751	10.3899	-3.47273	0.637603	2.07799	15.9426	-5.85973	6.2292	5.72577	3.62055	1.37438
49.6	1.33288	-5.24427	4.48353	0.142349	2.52172	-9.61616	-10.8189	-11.3499	10.3594	11.367	-3.58229	-3.34195	-1.02098	11.6378	-2.66217	-0.10532	8.68288	8.20691	2.98798
49.7	1.0139	-10.4563	2.7861	2.04294	-3.87834	-4.38102	-9.65859	-8.9628	10.5766	9.82536	-3.1646	-2.98343	8.86872	16.6748	-7.07941	5.46978	10.758	4.95626	-0.58197
49.8	0.795804	-8.52731	1.80188	2.28898	6.41183	-3.73772	-0.65212	-10.875	15.2625	7.0204	3.27384	-2.11617	4.44864	7.30876	-8.21616	6.46206	4.24293	6.36654	7.41084
49.9	1.58556	-3.64074	4.21292	1.94322	5.1709	-2.18098	-10.0628	-3.6795	11.8138	7.25009	11.0048	-4.76094	1.43947	9.95529	-7.67567	6.84733	4.16207	5.21642	2.14993
50	1.58437	-9.05802	2.89397	0.230157	10.7858	-1.68381	-8.91545	-6.60234	13.2056	7.44524	3.47553	-1.84081	2.34972	13.387	-7.03825	2.23477	3.75284	6.56158	2.04323
50.1	3.6317	-5.27504	2.9646	2.13769	6.12465	-3.21232	-9.3234	-11.2836	11.4041	12.5723	1.86183	-5.42366	1.61522	5.26316	-2.73257	6.70343	0.439858	6.8955	3.41927
50.2	2.67626	-5.75684	4.81867	0.59867	7.2126	-2.64429	-12.1882	-8.2756	11.9368	6.05075	-1.00409	-0.82699	5.49511	15.2812	-8.41817	7.72144	2.52458	3.07156	2.40495
50.3	1.26603	-6.86805	1.26244	-2.34799	10.7377	-2.25074	-11.8647	-5.67314	10.3201	5.38186	-0.3382	2.98714	-0.50654	12.2573	-7.76268	4.35967	2.41349	4.3193	0.466028
50.4	2.85878	-7.3436	4.73826	0.256636	1.8414	-3.03705	-8.32599	-8.54979	13.0573	8.23493	3.78648	8.55865	-0.5995	13.5118	-7.48132	5.28148	4.8868	6.12542	0.557658
50.5	1.97371	-7.47205	6.72579	0.241654	0.411756	-4.40015	-11.3593	-10.3986	10.8514	8.32966	7.94181	1.76079	-2.71854	12.1905	-10.1485	4.7217	0.163486	7.20261	1.06101
50.6	4.22984	-4.09149	1.96298	0.347137	4.40588	-4.95483	-13.7556	-8.58594	10.0026	8.90336	9.86541	-5.99903	2.02503	7.66088	-4.7671	8.16754	0.019034	10.9252	1.49893
50.7	2.8203	-7.07014	3.63671	3.06951	-3.72585	-2.09212	-8.34891	-10.0561	13.0425	11.9826	4.35038	-5.85535	0.511037	19.1237	-10.4261	9.28457	1.28221	5.79805	0.96
50.8	3.13281	-8.37812	-0.67422	-0.29108	8.63326	-4.59836	-11.3366	-5.82104	8.20022	2.4109	8.28099	-2.19831	9.17141	10.6013	-7.17702	-0.83739	0.004681	10.9153	-1.79914
50.9	2.57265	-7.84881	3.3729	1.71493	-4.03494	-2.17555	-8.6777	-8.56026	17.8128	9.92204	4.02881	-1.6442	0.046237	16.364	-4.35175	3.05561	-1.49433	8.61742	-0.46865
51	3.40432	-6.99731	1.95647	0.070694	10.3498	-3.77859	-12.6739	-5.41715	11.3808	9.43188	2.5164	1.87054	0.996145	12.941	-7.01029	-0.16353	-0.08312	3.5249	0.845991
51.1	4.53847	-7.0406	2.68342	1.6474	3.9119	-2.88272	-10.4555	-8.53878	14.4284	7.35964	1.51969	8.27373	4.359	13.9835	-2.66699	4.28604	-0.35933	9.75442	-0.94397
51.2	2.52386	-4.66565	1.916	1.7928	6.87448	-1.38916	-1.50568	-10.3916	10.6849	13.8192	5.32396	2.21338	4.19391	12.5245	-7.41252	3.48312	1.604	10.4527	2.45088
51.3	3.23145	-8.34093	-0.73913	0.893044	3.39211	-5.0096	-13.5382	-11.259	11.8641	8.63126	-1.18005	-2.16689	-1.45843	14.5361	-8.15335	1.20636	-0.61118	10.6779	1.80556
51.4	0.189415	-5.58165	0.656939	-0.50357	4.77386	-2.51787	-9.32762	-8.98053	14.0163	14.7353	0.324784	0.444049	4.91956	6.33332	-8.80108	1.06754	4.43657	11.3655	-6.18756
51.5	0.785002	-4.32622	0.56277	1.05651	4.33671	-4.7142	-10.4427	-9.77625	10.6505	11.9101	-1.1714	2.86567	0.994022	15.7849	-9.18543	2.19929	-1.53996	0.043042	-2.92626
51.6	0.365805	-3.32943	2.17786	1.27265	3.75927	-6.56825	-5.22512	-11.5077	9.36544	9.43374	1.58553	4.34772	3.86345	11.4942	-13.4771	-0.13782	1.70363	10.8167	4.79193
51.7	1.27078	-7.40642	3.7196	-0.76732	1.46731	-4.55885	-9.92988	-9.78842	9.92348	10.671	7.57411	-0.75736	-3.3542	8.72846	-8.35157	2.38359	-0.11247	4.40764	-0.53469
51.8	1.83794	-7.76332	0.52613	-1.48275	7.42898	-4.54975	-12.8894	-5.67043	10.257	11.6848	3.18221	2.2042	4.25294	18.2373	-10.6428	3.52059	1.05167	12.2132	0.203734
51.9	0.631551	-7.82018	1.03596	-0.61806	-0.79538	-4.8014	-10.7732	-7.98594	9.01132	14.6721	-6.15215	-3.04997	4.90369	7.72008	-7.4295	2.65567	-0.58885	12.1882	-0.15801
52	1.63276	-10.3862	0.372475	-0.60124	1.20618	-6.57503	-7.52024	-10.924	11.9458	10.4037	1.43942	-0.13169	-2.57607	10.9871	-7.81035	2.00774	2.08189	5.85868	-1.09238
52.1	0.390105	-7.82368	2.2356	-1.64365	-0.22906	-4.18307	-10.377	-9.69728	9.27868	17.3937	3.37075	1.28759	3.51602	17.3528	-4.61994	3.84006	2.2525	9.17384	-1.6472
52.2	0.742397	-10.1328	2.89206	2.06722	10.6879	-3.73971	-2.34713	-7.96858	10.4648	14.2485	6.98042	0.477043	2.28748	5.56191	-1.44202	4.74928	-1.0969	4.7695	-2.38966
52.3	0.996368	2.61883	3.02628	-0.54038	-1.77906	-4.46844	-4.70288	-6.57862	12.4005	12.0845	2.87474	1.57938	3.84422	11.0544	-3.87194	-1.75497	3.77481	6.98568	1.76669
52.4	-0.34639	-5.0906	2.55503	-3.07585	1.34473	-3.89935	1.93274	-7.2794	16.1553	11.518	9.4848	-5.32244	2.5732	12.2556	-5.85594	1.53932	1.83406	5.4473	-0.27793
52.5	1.25411	-6.74136	1.50595	-2.93963	1.95841	-4.95657	-4.47206	-9.73237	15.2495	12.2972	2.56092	1.87574	4.83576	12.329	-5.07987	3.0243	3.2283	7.40906	5.08781
52.6	-0.57785	-4.35165	2.30563	-7.40788	2.58406	-2.49958	-7.43358	-7.84526	10.5193	11.2896	0.839391	2.14643	4.27533	9.5642	-3.69258	8.15445	-0.9722	5.31303	2.55783
52.7	0.881865	-0.33051	3.00526	-6.14399	2.55951	-3.37375	-7.02992	-11.8276	11.7222	6.77334	0.379592	3.28215	-0.58373	13.8286	-11.0627	0.149638	1.24147	7.6016	3.82594
52.8	0.7876	-8.75769	0.033807	-9.93965	7.07423	-5.20392	-7.05836	-10.4517	14.5304	8.76202	1.25188	2.17078	4.07695	11.7945	-4.75692	7.68329	0.340775	2.96224	4.21829
52.9	1.59242	-5.47669	1.85296	-10.6028	6.68685	-4.11393	-6.79018	-8.78941	12.8994	6.61636	1.74787	-0.07645	0.182823	14.9947	-5.80445	3.21895	1.90123	0.867343	2.0449
53	0.560912	-0.77684	2.62356	-9.11027	3.27692	-5.23872	-2.01891	-9.99573	15.4354	5.76498	1.97094	2.70871	4.0045	12.8829	-3.17377	0.000248	0.236114	6.56445	1.96692
53.1	1.97285	-0.50312	1.14165	-11.8165	-4.70017	-5.3002	-6.43142	-10.8794	12.2382	3.0749	2.26636	-0.92973	4.64091	15.9697	-2.42493	-0.30169	2.19409	10.3452	2.02936
53.2	1.4537	1.11369	0.69513	-11.3152	10.0209	-4.18323	-2.02142	-9.53032	10.6044	3.01979	6.41388	8.07743	-1.96067	13.9073	-3.16051	3.49301	0.775853	3.17813	-1.0612
53.3	-0.36607	-0.66873	1.68664	-11.7311	-0.20809	-4.37629	-5.62459	-11.4264	11.2899	11.6305	6.90147	-2.52077	1.00612	9.47272	-6.67108	5.32206	2.54689	8.30407	1.47865
53.4	0.358567	-1.23535	0.437178	-12.9808	5.04266	-0.43285	-7.39808	-12.1387	13.1339	8.18424	7.58348	-5.98577	3.66971	10.8672	-0.75492	2.80214	-0.1012	3.65924	2.27814
53.5	-0.47635	-2.49263	1.93157	-11.1816	9.19582	-3.32701	-8.08921	-7.19088	9.53895	9.12366	4.47669	3.18527	1.54183	16.9546	-4.92768	0.793192	1.26203	8.69231	4.95832
53.6	1.94185	-6.85342	2.25278	-10.7617	5.20643	-5.66575	-8.70937	-10.5201	10.9979	11.9341	-0.29564	2.97471	3.63725	16.1825	-5.42646	2.38835	1.02739	4.86921	3.15947
53.7	-0.34103	-6.1192	1.56825	-12.223	7.22254	-2.71756	-7.34933	-9.95802	10.6635	7.54094	0.846101	2.00099	1.51251	14.4409	-7.03707	-3.0776	-0.8795	4.66708	3.1063
53.8	-2.58024	-7.17382	3.55047	-11.8704	4.02111	-5.54516	-5.38605	-9.14513	12.8962	12.0184	12.3497	3.38551	1.09264	17.0921	-6.17035	-1.87021	-1.18927	5.76802	-3.25616
53.9	1.72135	-9.63587	0.340302	-12.1542	6.86145	-9.94531	-9.4596	-6.7709	10.2338	11.228	9.47708	-16.1937	2.16187	15.4098	2.86392	1.5258	-0.10252	5.04102	0.094053
54	2.36209	-4.10445	4.35846	-13.3656	-0.92572	-4.35077	-8.25585	-7.96996	12.6591	13.0335	7.59457	6.97058	3.12597	17.3941	0.182625	1.60521	1.56178	9.65436	3.6549
54.1	0.819036	-0.20179	3.24395	-11.6766	8.7424	-4.62253	-3.99759	-8.86734	12.1863	9.23491	1.20629	5.32158	-5.07593	9.36695	-0.47671	5.91098	2.535	10.7875	4.93383
54.2	1.62583	-5.96053	1.38908	-10.7717	0.600997	-6.35231	-14.4505	-10.3684	14.2618	11.6554	4.16542	1.99195	6.42542	15.3081	-1.87553	4.59039	3.00862	10.0505	3.40999
54.3	1.21696	-6.97611	0.269245	-12.7323	-0.09789	-0.33501	-13.2491	-8.57236	11.4299	5.98194	2.41527	4.14419	2.83461	14.0439	-0.62541	4.99987	-1.29557	3.25988	-0.03381
54.4	-0.8724	-3.79151	1.43583	-12.0608	6.94885	-1.53042	-11.2304	-9.51466	10.9176	13.2553	0.28085	0.599532	3.38081	15.822	-2.0746	3.97732	0.286037	8.46877	1.24918
54.5	1.80424	-4.63088	1.94078	-11.7524	1.70966	-4.73963	-12.347	-8.62056	10.8256	9.86009	-4.92669	-3.71223	-2.37536	16.2073	-2.99681	0.24658	1.24359	8.24411	-2.18742
54.6	0.600144	-3.82528	0.338481	-11.8978	3.65563	-2.84342	-8.4994	-9.65279	15.3404	9.7442	4.53885	3.51593	-0.48	16.7582	-3.05132	-1.39192	1.25482	6.67617	2.77207
54.7	-0.35233	-2.90677	-0.09739	-11.3728	5.73761	-4.4595	-6.62707	-11.3402	14.0974	8.28076	3.70561	-1.17456	1.23783	11.7482	-5.30517	0.932272	0.144905	8.65404	-0.88652
54.8	1.61591	-8.14334	0.911753	-13.4773	-1.4403	-5.13423	-4.67703	-7.45228	13.9574	9.26044	0.757097	1.46573	0.869248	10.0171	-1.26528	4.54959	1.62021	7.73179	-0.20397
54.9	2.93441	-6.05003	-0.46116	-13.7356	6.39227	-3.0223	-3.12123	-8.37323	15.6895	8.29049	2.85317	0.252683	2.50259	8.32401	-2.58832	2.88426	0.733148	10.4713	2.64382
55	1.15151	-4.37114	1.64878	-11.5586	0.42872	-5.34596	-10.8441	-8.61296	11.1032	7.93523	-0.48005	1.73559	5.03796	12.7655	-5.78435	4.37786	-6.7e-05	1.13427	-0.47023
55.1	0.564546	-3.91744	-1.99273	-11.4502	-0.75027	-7.17459	-12.8762	-9.16199	12.9108	10.0175	2.83973	0.120109	2.45726	15.9396	-4.61754	3.19976	1.98268	11.566	1.12789
55.2	-0.66574	-4.33459	0.862715	-11.944	7.91208	-3.64372	0.188041	-10.15	12.8221	7.0954	3.15186	-2.1303	4.25876	15.2759	1.67603	3.2201	1.4639	11.8346	2.3237
55.3	0.798778	-1.64222	0.691804	-10.566	-2.28128	-6.6483	-8.79063	-9.33943	16.0245	12.725	4.74792	-4.19496	5.1732	14.6151	-1.77765	-0.3336	-2.86794	9.64911	4.46635
55.4	1.62443	-5.28289	-0.05105	-11.6151	4.49146	-5.83072	-8.55873	-10.8694	12.2424	5.78146	2.05908	-1.63921	3.0713	14.3874	-3.02266	1.07708	2.64989	13.5711	-0.60592
55.5	0.659695	2.65268	2.01568	-9.52775	7.22484	-6.0934	-10.6806	-9.97344	12.5147	13.1695	2.33569	-2.09585	2.71069	17.5445	1.10628	-0.55627	0.187692	10.2079	-0.66613
55.6	1.98826	-3.37976	0.233021	-12.7652	1.32798	-2.37759	-10.1399	-9.15017	15.2372	13.884	6.34054	0.371727	0.226624	17.3795	1.40345	0.260798	0.242962	5.21058	-0.1704
55.7	1.45901	-2.35925	0.675982	-12.7581	7.44334	-2.8293	-2.34962	-9.71441	14.0562	10.0799	-0.25435	-2.77879	2.50944	16.5647	-0.53274	4.69334	0.395898	9.45504	-0.39362
55.8	0.896297	-5.20886	-0.53006	-12.5959	9.44537	-6.71802	-5.7471	-6.57936	12.1848	5.19785	-0.48741	-1.17164	2.53301	19.0983	5.24658	1.31709	1.88724	9.50092	-4.38469
55.9	1.27393	-3.5402	2.4396	-13.5036	-1.78931	-3.56592	-3.77904	-8.42865	12.2396	15.5913	12.2521	2.81568	2.93407	12.9543	-3.0369	1.7823	2.40458	11.1147	1.29053
56	-0.40429	-4.02818	0.06778	-13.8803	0.149568	-2.73564	-2.58243	-10.146	10.136	10.494	6.14613	4.01861	-0.93182	12.4481	-3.73771	-0.14997	3.13255	10.0074	-0.51167
56.1	4.59987	-3.27085	-1.2431	-11.538	7.73963	-5.95464	-14.5055	-6.183	13.1671	13.3637	3.53069	2.49344	9.17683	11.1853	2.9288	2.69485	2.56035	13.2905	4.78154
56.2	1.61286	-5.54747	3.48287	-10.944	8.01989	-3.84972	-10.6564	-9.625	14.5076	4.01294	3.22965	-0.387	1.40409	17.4365	0.764464	1.48726	0.470158	8.22868	0.584162
56.3	2.14468	-5.4984	-0.98815	-13.5631	15.8526	-2.93113	-0.55468	-10.9055	15.4519	7.55456	5.70486	-0.74219	2.4678	20.9238	-4.41604	-1.97094	3.18215	6.18173	3.34303
56.4	1.00259	-5.62241	2.58161	-13.1049	7.46567	-5.6527	-9.86297	-10.7224	11.173	8.77887	4.42107	4.73463	0.649237	16.0135	-4.69131	2.10219	1.75501	10.4264	3.30141
56.5	1.53803	-4.58153	4.00774	-14.8486	-2.50062	-6.21983	-9.83804	-5.73645	15.9172	13.7829	1.97343	7.28586	-0.98075	14.3975	-3.92562	4.12909	-0.70177	7.39321	-1.97272
56.6	1.5694	-7.21299	2.04427	-14.572	1.36443	-5.30395	-3.62842	-11.3894	14.2146	7.07347	4.02499	0.648294	1.34386	11.5903	-5.04458	0.290754	2.16446	4.69125	-3.37512
56.7	2.93766	-7.75411	1.26071	-13.7723	5.11673	-8.15924	-4.40256	-10.5088	13.142	13.6361	10.0623	7.15646	2.5748	13.377	-3.15361	2.77345	3.02178	7.92769	-1.10917
56.8	3.2135	-5.40584	0.505981	-11.4277	-0.19543	-5.94529	-1.93035	-9.30193	10.8157	11.6481	-0.40507	9.20893	8.77821	14.0549	-2.34622	-2.62863	0.263063	10.0545	1.7692
56.9	2.26401	-4.58634	1.09722	-18.2019	0.96921	-8.14287	-3.11441	-8.5036	7.99102	10.2064	3.12761	3.75835	1.53641	16.7001	-2.1681	-0.78515	0.526827	10.0985	1.03406
57	2.4458	-7.27859	1.45588	-14.4934	2.2947	-7.98382	-0.99196	-9.93538	11.8237	14.7292	4.34827	-1.9874	1.88845	10.0314	-0.49849	-1.01991	1.41324	9.817	0.916198
57.1	2.13048	-6.15051	1.36796	-13.6738	0.019982	-8.2263	-5.79848	-4.66465	8.12516	3.8021	-2.39604	-0.595	3.11021	11.9921	-0.9234	-1.1339	3.57197	4.6737	-1.21227
57.2	1.27909	-4.30231	2.47938	-11.4103	2.63382	-6.1105	-5.87819	-10.6432	14.2181	6.0616	5.97934	-5.30269	5.55289	12.5775	3.66952	1.46989	1.7103	6.56272	3.47555
57.3	2.12487	-2.83366	5.00101	-11.7297	1.4412	-4.53321	-5.9387	-9.11289	11.1564	10.8986	3.13823	6.74195	-0.39302	16.8913	-5.8076	-2.66498	2.37884	7.67859	-1.74216
57.4	2.16788	-3.55374	2.21243	-13.1468	1.82411	-9.01059	-4.5854	-8.84895	11.6825	12.2189	3.84523	0.417663	2.07382	14.5458	0.97141	2.12646	0.200053	11.5811	0.851431
57.5	2.83546	-5.59947	1.35679	-10.8504	1.08383	-5.98628	-4.24288	-6.4585	13.9098	6.44489	0.418283	1.03059	0.467506	14.9268	-0.10854	1.50598	1.49376	5.9967	-1.54312
57.6	0.515004	-7.44973	0.268571	-13.4417	4.67514	-5.77133	-8.18213	-8.98977	14.5728	8.77015	4.51693	3.46949	3.80008	10.4276	0.485361	-0.0886	-0.8468	4.38866	-2.78539
57.7	1.24338	-3.7109	2.58734	-13.7493	2.55328	-8.2627	-10.2067	-12.7247	16.0209	6.12491	-4.74375	3.2821	1.67954	9.21079	-0.6235	2.5417	0.156581	9.27282	-4.70232
57.8	-0.13148	-6.57478	0.209729	-13.6548	0.75756	-7.25638	-6.47125	-9.06132	10.5643	6.94346	4.01125	-0.99936	7.41281	12.5308	-2.31825	-0.85464	3.61236	11.5231	1.11543
57.9	0.88534	-5.78149	2.76142	-15.2582	5.98791	-6.22293	-9.78784	-7.14365	16.2066	9.3681	5.50915	-8.70449	-1.43055	7.05699	-2.78365	-3.21585	-2.78058	13.1635	0.554341
58	0.205047	-4.94759	2.01519	-16.1137	2.23916	-7.99023	-12.4629	-7.45541	16.1881	11.4664	4.63491	-7.71365	2.71171	9.10707	-2.9982	-3.00231	4.25052	2.49313	-1.17287
58.1	2.30728	-3.90111	-1.41087	-11.858	1.80782	-3.66204	-2.23306	-7.33357	16.3825	1.54197	5.88916	-4.56039	0.024239	13.1516	-2.52179	0.112281	-0.14367	6.67694	0.578676
58.2	3.03705	-4.87149	0.68219	-14.1009	-5.6497	-5.99206	-1.35472	-11.3645	12.6108	5.48135	9.49781	-7.50619	3.98704	12.6333	0.251999	-2.1137	-0.47234	10.3838	-1.71135
58.3	1.29858	-7.7739	0.7511	-14.9007	4.4704	-3.8568	-1.98591	-7.96669	13.2389	4.47303	4.28787	-1.15858	2.60418	6.67718	0.433672	-3.80473	-2.00867	8.28222	-1.43397
58.4	-0.53495	-4.4362	1.11864	-17.407	7.83699	-9.31336	-9.76485	-11.6427	15.491	10.9735	3.14022	-3.54531	1.7415	10.4627	-5.1171	-0.13465	2.72889	8.0945	4.00926
58.5	0.483388	-6.45779	1.39209	-16.3091	9.96488	-4.41424	-7.57769	-10.3455	12.0819	11.6982	-0.54111	-4.27167	-1.01645	8.73493	-0.32083	0.564548	0.161599	7.05583	0.267142
58.6	2.64727	-5.90177	2.16286	-12.4631	-0.93127	-8.93009	-3.42723	-12.4397	17.0852	5.96044	2.04614	-2.22754	-1.92932	5.3215	-3.10628	0.991281	3.78107	5.22375	-0.75347
58.7	3.22718	-6.72091	2.52713	-13.7949	10.3659	-8.50002	-1.45858	-9.81979	13.8649	9.77141	8.87704	4.39895	0.887448	9.66567	2.2482	1.36611	2.25944	6.36091	-1.09607
58.8	1.84412	-10.7182	4.75783	-12.7628	5.08584	-5.63733	-1.3601	-10.6734	15.514	3.15793	3.55584	-9.11916	4.09926	9.83159	0.450603	5.52695	-0.82749	5.9482	-1.59359
58.9	1.42226	-8.60495	0.794053	-13.846	4.9146	-5.7065	-15.1733	-8.88059	15.9825	0.697375	-0.66957	0.291617	2.12455	7.36124	-2.02216	7.39126	-0.0575	2.07783	0.989077
59	0.632505	-6.07247	0.001504	-15.65	4.68982	-8.45235	-13.8487	-7.14654	15.8958	8.21325	1.5994	-3.79901	1.80692	12.1093	2.38382	-1.15082	2.78201	11.2292	1.88408
59.1	1.4175	-2.95185	1.55595	-13.2777	2.38369	-6.54374	-7.08448	-11.1845	12.8785	7.5858	0.659523	1.99508	2.06542	12.2258	3.79023	1.09477	1.85616	14.4885	-0.81569
59.2	1.52555	-5.96367	1.01039	-13.8119	1.98053	-5.24562	-4.90679	-7.43786	13.1416	8.50139	2.64803	2.22425	-0.96091	10.3074	3.78258	-2.63218	3.05283	16.1438	0.629387
59.3	1.20231	-5.40454	4.98101	-11.1537	8.434	-7.70883	-11.404	-9.81599	9.10215	3.14716	3.12046	-0.17566	0.940295	6.46088	5.04502	4.67804	2.48453	5.04644	1.05491
59.4	1.29579	-3.34789	-1.47922	-11.7616	0.451283	-2.19791	-7.95434	-7.17733	14.4146	9.11621	3.21432	-1.30247	7.16386	5.78151	0.316363	3.84707	3.33265	9.49631	2.47175
59.5	2.42545	-6.28023	4.58495	-12.704	6.3404	-5.53105	-8.57179	-10.0901	12.5384	5.89288	7.62233	0.741793	3.73825	9.37233	1.11954	-4.46112	1.68758	8.22847	-0.15843
59.6	0.328289	-0.12255	1.34374	-14.8464	11.5064	-9.57493	-9.84853	-10.9764	13.4777	2.48485	2.49961	-2.4773	-0.47794	9.69263	0.606885	4.29435	2.86189	8.93919	-0.22164
59.7	0.301277	-8.54051	2.93256	-13.4468	5.24121	-6.54206	-18.2896	-8.46587	15.0886	9.27354	0.685154	1.05356	2.30017	7.12206	1.58253	0.03961	2.98766	6.67098	6.06789
59.8	-0.00259	-4.36394	2.01346	-13.9253	-3.59238	-6.55027	-14.6774	-6.12964	13.0672	5.33674	6.75662	0.361753	1.0484	6.32983	-1.57475	4.24191	0.484263	10.507	-0.26023

## Sheet: Figure 5C-D, G-H
Figure 5C: Uncaging-evoked current (pA)
in DAMGO						in CTOP
0.2mW	1mW	4mW	13mW	40mW	84mW	1mW	4mW	13mW	40mW	84mW
-0.28931	12.1	34.006	51.4937	84.5016	84.7539	9.30034	30.1969	47.3823	91.4597	103.848
4.432	17.62	33.09	61.25	67.48	65.41	13.7672	34.6627	49.6593	64.2871	68.4972
-0.554119	10.8771	29.0093	47.5769	74.4807	85.3309	7.62803	24.7904	48.6106	69.1555	82.3507
-7.33399	14.5299	40.1287	64.4031	79.3052	81.8219	8.1758	24.6789	35.5459	52.8869	54.675
7.92548	9.90643	21.3478	41.471	60.6952	64.7822	-1.11964	5.7686	15.1507	18.7312	20.2255
-2.77671	11.8289	28.5579	41.6883	53.1879	65.3133	3.02568	22.3556	36.1	44.8472	42.9392
	17.7736	48.7701	62.2639	89.1951	95.1003	29.4954	64.5	89.3	125.504	126.087
	16.4103	50.5187	71.686	120.939	130.673	36.6092	71.4051	114.644	144.84	148
	26.2851	62.5353	119.609	149.315	138.267	6.66608	17.4252	37.0121	58.8425	61.9458
						21.1126	44.9585	74.8335	109	116.759
Figure 5D: % Max Peak Current
in DAMGO						in CTOP
0.2mW	1mW	4mW	13mW	40mW	84mW	1mW	4mW	13mW	40mW	84mW
-0.341	14.299	40.1232	60.7567	99.7023	100	8.9557	29.078	45.6266	88.0707	100
-0.649377	26.9	50.6	93.6	103.2	100	20.0989	50.6046	72.4983	93.8536	100
12.234	12.747	33.9962	55.7558	87.2846	100	9.2629	30.1034	59.0288	83.9768	100
-2.125	17.758	49.044	78.7113	96.9242	100	14.9535	45.1374	65.0131	96.7296	100
	15.2919	32.9532	64.016	93.6912	100	-5.115	26.3517	69.2104	85.5665	100
	18.111	43.7245	63.8282	81.435	100	7.0464	52.0634	84.1038	104.444	100
	18.6893	51.2828	65.4718	93.7906	100	21.9943	48.1	66.5653	93.5864	100
	12.5583	38.6604	54.8591	92.5509	100	24.7229	48.2213	77.4214	97.8133	100
	19.0104	45.2279	86.5058	107.99	100	10.7611	28.1298	59.7492	94.9903	100
						18.0822	38.5054	64.0923	93.3889	100
Figure 5G: Uncaging-evoked current (pA)
in Delt II						in TIPP-Psi
0.2mW	1mW	4mW	13mW	40mW	84mW	1mW	4mW	13mW	40mW	84mW
-0.63	-0.70797	3.20602	4.69351	8.38324	10.8319	7.74253	7.21028	9.35536	15.3189	25.7099
1.12606	3.662	-1.48	4.643	13.12	13.8	0.846389	3.19207	9.12758	13.8101	19.231
1.32245	1.5317	1.46115	1.13883	3.24	-0.0207755	5.89015	13.4209	20.7003	27.8221	31.7627
	3.71579	8.30948	19.3203	35.7896	45.7669	-1.10374	0.176555	2.25491	10.633	17.9792
	0.956549	11.0081	23.8229	32.1861	35.4947	-0.13414	3.48747	45.0928	5.30023	3.57154
	1.15688	4.81966	13.2786	23.1076	31.2645	1.43384	12.5673	1.77873	56.2	62.9424
	0.254558	3.48631	8.77094	15.2413	17.2043	5.36364	3.11451	9.16463	17.6964	19.0693
	4.88383	2.75171	11.2906	20.9786	26.8531	1.56546	6.59142	6.0911	17.2168	22.4627
						0.771829	5.85825	6.06336	14.2367	18.8693
						-0.99792	7.08682	24.7109	16.2141	22.0486
						0.413956			39.2904	46.718
Figure 5H: % Max Peak Current
in Delt II						in TIPP-Psi
0.2mW	1mW	4mW	13mW	40mW	84mW	1mW	4mW	13mW	40mW	84mW
-5	-6.536	29.5979	43.3304	77.394	100	30.115	28.0448	36.3882	59.5837	100
3.1725	26.5	-11	33.6	95.1	100	4.4012	16.5986	47.4628	71.8117	100
7.6867	8.1189	18.1561	42.2146	78.1997	100	18.5442	42.2536	65.1717	87.5936	100
	2.6949	31.0134	67.1168	90.6786	100	-6.139	0.982	45.9944	59.1406	100
	3.7003	15.4158	42.4718	73.91	100	-2.736	71.1355	71.6414	108.111	100
	1.4796	20.2642	50.9811	88.5901	100	2.278	19.9664	9.3277	89.2657	100
	18.1872	10.2473	42.0458	78.1236	100	28.1271	12.3341	36.2938	92.8005	100
						6.1995	29.3912	27.1603	68.1821	100
						3.4416	26.5697	27.5	63.4816	100
						-4.526	15.1694	52.8937	73.538	100
						0.8861			84.1012	100
