# Supplementary material for: Convergent, functionally independent signaling by mu and delta opioid receptors in hippocampal parvalbumin interneurons
Source: eLife. 2021 Nov 17;10:e69746. doi: 10.7554/eLife.69746 (PMC8716102; doi:10.7554/eLife.69746)
Supplement: Figure 6—figure supplement 1—source data 1. [file elife-69746-fig6-figsupp1-data1.xlsx]

## Sheet: Figure S3B
Figure S3B
100 nM DAMGO	300 nM DAMGO	300 nM DAMGO + TIPP-Psi	1 µM DAMGO
0.33631	0.097168	0.594209	0.849277
0.233926	0.12954	0.077658	0.655383
0.078024	0.298285	0.519567	0.800605
-0.26724	0.529752	0.696574	0.75987
	0.113227	0.605488	0.4576
	0.395063	0.33138	0.897472
	0.251105	0.323465	0.572457
	0.416946	0.232497	0.453013
	0.658839	0.040917	0.72435
	0.345382	-0.16761
	0.320469	0.064778
	0.432347

## Sheet: Figure S3C
Time	300nM DAMGO												300nM DAMGO + TIPP-Psi
-5	1.02291	1.15553	0.827724	1.20766	0.960112	0.866314	0.960758	1.05021	1.21569	1.06113	1.1429	1.10937	1.10507	0.907299	1.06643	1.31406	0.956623	1.34784	0.975774	1.15407	1.37537	1.04149	1.11478
-4.66667	0.982978	1.13839	0.817296	1.25313	1.02406	0.951631	1.05329	0.922485	1.16058	0.987455	1.19661	1.15291	0.677309	1.07292	1.14237	1.11782	0.941371	1.02848	1.24894	1.15908	0.840929	1.20788	0.889189
-4.33333	1.34651	1.0575	0.477084	1.17007	1.0182	0.677441	0.894969	1.01009	1.16266	1.03093	1.15051	1.1393	0.786564	1.01453	1.12945	1.14278	1.03229	1.18769	0.994746	1.10468	1.28675	1.15821	1.11972
-4	0.842359	1.01903	0.844461	1.10488	1.02294	1.07065	1.02435	0.970481	1.03371	1.25883	1.03618	1.14239	1.08262	0.993398	1.18147	1.03177	1.03713	1.25076	1.17691	1.12855	1.21048	1.18938	1.01909
-3.66667	0.782744	0.953864	0.91769	1.03489	1.03968	0.971642	1.04401	1.01879	1.03066	1.1077	0.95317	1.13206	1.06318	0.830859	0.999488	1.09747	0.931298	1.24917	0.977649	1.06549	1.25407	1.14325	1.2888
-3.33333	0.777316	1.04624	0.846203	1.06887	0.963163	1.20292	1.01853	1.12526	1.12585	0.949106	0.918331	1.18233	0.919316	0.8629	1.07829	0.930547	1.01109	0.955157	0.895895	1.10817	1.14983	1.13974	1.5046
-3	0.931671	1.06118	0.898721	1.08239	0.959889	0.916861	1.1198	0.974573	1.03149	0.95826	1.05402	1.17283	1.14073	1.04311	1.08966	1.06434	1.08945	1.03226	0.761162	1.15588	1.18588	1.20417	0.829145
-2.66667	0.894429	0.818186	0.905987	1.03816	0.986487	1.1046	0.99457	1.13674	1.21144	1.14347	0.882587	1.12562	1.11662	0.952746	0.976299	1.09095	1.14217	1.05364	0.915978	0.903656	1.11938	1.08166	1.13281
-2.33333	0.979777	0.946268	0.870041	1.05512	0.701997	1.07108	0.988165	0.875706	0.780359	1.10457	1.00778	1.11517	1.07439	0.881263	1.01446	0.904423	0.984368	1.04064	0.903691	1.00903	0.906704	1.08904	1.2835
-2	1.01459	0.943233	0.87591	1.08247	1.03134	1.07057	0.95424	1.02823	0.844356	1.08306	0.963136	1.02245	1.20321	1.09027	1.10702	0.993348	0.825074	0.928271	0.924149	1.01715	0.867517	0.860298	1.39359
-1.66667	0.940292	0.93905	1.01226	1.04592	0.938712	0.99999	0.952972	0.910755	1.10831	0.83352	0.927499	0.991211	0.807273	0.861727	1.00202	1.10241	0.890026	0.988393	0.884311	1.04859	0.904378	1.11211	0.610933
-1.33333	0.909953	1.0198	1.02782	0.911959	0.978531	1.02651	0.986138	0.827929	0.950816	0.878535	1.00192	0.993963	0.873321	1.04341	0.982406	0.985344	1.18675	1.02032	0.731928	0.999663	1.00762	1.08063	0.973018
-1	1.01215	1.07392	1.01929	0.905526	1.00994	0.800374	1.01669	0.969693	0.975202	1.14207	1.08424	1.02306	1.06393	1.07237	0.999388	0.897945	1.07192	0.980829	0.730725	0.871846	1.21699	0.992088	0.977715
-0.666667	1.16585	0.960381	1.03763	1.05618	1.01873	0.958849	1.06303	1.09646	1.09255	1.03264	1.20952	0.980061	1.0067	0.918748	0.914682	1.05827	1.05714	1.07223	0.943336	0.975087	1.09679	0.899913	0.968211
-0.333333	0.957162	1.06361	1.02709	0.997943	1.02274	1.1437	1.02692	1.05212	1.02877	1.03017	0.813689	0.989249	1.04557	1.01347	0.994485	0.96269	0.969088	1.00996	0.751668	0.906408	1.48179	1.05496	1.07654
-5e-11	1.03405	1.02993	0.928335	0.969702	0.732338	1.1396	0.835679	0.828944	1.20974	1.03006	0.952019	0.899704	1.09052	1.14789	0.995049	1.06116	1.16594	1.05201	0.74741	0.946337	1.17186	1.06623	0.750559
0.333333	1.14742	0.978453	0.941512	0.951042	0.880896	1.10708	0.886782	1.03347	1.22145	0.57589	0.996985	0.956291	0.897244	1.3527	0.952334	0.499144	0.844126	0.843581	0.918046	0.885445	1.04639	1.02686	1.22863
0.666667	1.06018	1.01545	0.844738	0.90825	1.02604	0.93789	0.827467	0.87328	0.413369	0.603343	0.938871	0.929518	0.803735	0.88545	0.930339	0.152751	0.674081	0.710672	0.290541	0.917993	0.91645	1.24402	0.927171
1	1.02688	0.967588	0.854131	0.847723	0.893542	0.72338	0.84799	0.558521	0.247998	0.659831	0.691075	0.836148	0.523603	0.899869	0.649678	0.350539	0.341364	0.782032	0.46273	0.846045	1.11096	1.10348	1.24894
1.33333	0.952425	0.871266	0.880619	0.583393	0.913758	0.680817	0.708074	0.403185	0.428649	0.731656	0.747153	0.573385	0.390508	0.850454	0.461769	0.227182	0.163068	0.595302	0.802972	0.920487	1.12722	1.12091	0.879037
1.66667	0.941243	0.914816	0.813813	0.502483	0.88879	0.500329	0.77349	0.4823	0.201026	0.521654	0.67342	0.712796	0.307097	0.838876	0.595156	0.367556	0.417509	0.728651	0.845153	0.881532	1.22041	1.21371	0.976813
2	0.931205	0.817937	0.834168	0.340616	0.890836	0.654688	0.72511	0.524505	0.588765	0.649536	0.651489	0.627604	0.223663	1.0223	0.359017	0.275364	0.473841	0.693785	0.6005	0.840326	1.20428	1.15752	1.25308
2.33333	0.853313	0.865339	0.788961	0.511397	0.877061	0.610053	0.73057	0.756778	0.167162	0.670304	0.602767	0.696796	0.479648	0.813272	0.399965	0.31303	0.424318	0.66526	0.763302	0.885459	1.07406	1.19639	0.883225
2.66667	0.808029	0.850863	0.616229	0.468841	0.903619	0.532054	0.786146	0.730999	0.3611	0.672899	0.711282	0.538732	0.519794	0.974374	0.567629	0.316881	0.339387	0.633699	1.25012	0.860678	1.03054	1.21478	0.669237
3	0.98864	0.803557	0.679094	0.481531	0.856731	0.730821	0.769979	1.10415	0.445239	0.796728	0.69536	0.608791	0.795046	1.1468	0.491065	0.36185	0.326926	0.695026	0.851082	0.839058	1.58512	1.15708	1.34611
3.33333	0.952756	0.939951	0.628272	0.516622	0.883501	0.601676	0.794469	0.943467	0.557094	0.740382	0.66508	0.477539	0.491332	0.738429	0.639035	0.263972	0.449037	0.766378	0.501855	0.889017	0.729441	1.17807	0.925046
3.66667	0.833073	0.945116	0.742919	0.524821	0.884044	0.551948	0.746278	1.16546	0.360274	0.829487	0.823301	0.516909	0.392633	0.79619	0.425886	0.362876	0.245772	0.591712	0.454155	0.663678	0.910122	1.12016	0.941251
4	0.981179	0.768603	0.754812	0.487511	0.915685	0.75362	0.756751	1.51508	0.489087	0.714881	0.714166	0.567152	0.375842	1.13394	0.538494	0.353414	0.246566	0.574076	0.815217	0.816452	1.13981	1.13917	0.846463
4.33333	0.931269	0.826007	0.611781	0.340812	0.885289	0.695776	0.762271	1.20812	0.570142	0.591654	0.731513	0.633856	0.547974	0.801816	0.556312	0.530173	0.508299	0.745414	0.941618	0.801079	0.931901	1.14796	1.0916
4.66667	0.779826	0.886965	0.634847	0.440864	0.903481	0.75476	0.794651	1.35758	0.729087	0.687115	0.540032	0.585441	0.599455	0.919444	0.422013	0.299326	0.341998	0.772524	0.543699	0.772909	0.84971	1.15696	1.09576
5	0.902795	0.869101	0.529316	0.489277	0.864216	0.552126	0.569873	1.32936	0.34811	0.746785	0.866218	0.590752	0.585227	0.878952	0.479295	0.451674	0.434742	0.658656	0.413069	0.73765	1.03307	1.1044	1.19856
5.33333	0.931539	0.805829	0.675814	0.726091	0.882704	0.703871	0.6928	1.34612	0.409873	0.579627	0.758933	0.678861	0.669991	1.20534	0.449965	0.315975	0.527452	0.692547	0.777848	0.81325	0.919453	1.1072	0.93614
5.66667	0.904316	0.884416	0.780295	0.630205	0.898287	0.701754	0.739812	1.45932	0.57705	0.778922	0.741107	0.542261	1.16039	1.29528	0.482399	0.509769	0.501779	0.658716	0.59672	0.531996	0.784203	1.15219	1.23841
6	0.833713	0.931435	0.694778	0.989789	0.806987	0.676847	0.697126	1.06124	0.410855	0.873031	0.14852	0.595397	0.958732	1.0569	0.416948	0.346848	0.772994	0.752046	0.854997	0.837893	0.776606	1.13327	0.934324
6.33333	0.795365	0.942701	0.790539	0.564745	0.918121	0.651261	0.698319	1.34665	0.942082	0.653479	0.3689	0.678934	0.534425	1.09371	0.57418	0.393702	0.426062	0.663512	0.713249	0.666563	0.929489	1.1149	1.17313
6.66667	1.23525	0.878306	0.722535	0.478549	0.836402	0.616548	0.707874	1.47019	1.01727	0.616241	0.277828	0.6081	0.452417	0.973028	0.518466	0.423603	0.235982	0.689589	0.93349	0.769474	0.802004	1.17435	0.849426
7	0.761455	0.898903	0.834124	0.626805	0.917359	0.600681	0.596051	1.3976	0.135847	0.65285	0.20115	0.687173	0.825275	0.770939	0.511272	0.44002	0.408282	0.780045	0.866793	0.64194	0.825983	0.857125	1.19355
7.33333	0.78754	0.827729	0.652582	0.743059	0.913435	0.67871	0.755129	1.30613	0.581257	0.881394	0.508989	0.688416	0.444054	0.919934	0.565248	0.336947	0.281079	0.639373	0.672071	0.762228	0.790381	1.02375	1.11978
7.66667	0.844598	0.845425	0.718463	1.07032	0.789809	0.682519	0.681781	1.30421	0.866762	0.735795	0.632502	0.594801	0.768973	0.780253	0.433202	0.374085	0.519424	0.69158	0.718986	0.823169	0.775215	0.83182	0.911002
8	0.956869	0.811276	0.71017	0.482233	0.899552	0.670341	0.740236	1.03106	0.761296	0.65343	0.894906	0.651509	0.653553	0.769237	0.482071	0.45291	0.533024	0.849428	1.56168	0.701707	0.757439	0.641635	1.44238
8.33333	0.978961	0.872589	0.6681	0.863294	0.924318	0.719586	0.674496	1.42813	0.823132	0.501083	0.741446	0.534793	0.60903	0.705504	0.500427	0.421225	0.416301	0.751763	0.864124	0.680645	2.34996	0.715577	1.2629
8.66667	0.874138	0.836576	0.728576	0.604706	0.889914	0.805103	0.645729	1.36482	0.626022	0.619677	0.661996	0.557006	0.509652	0.879647	0.410082	0.371439	0.586887	0.700073	0.744232	0.559838	2.40636	0.693877	1.22242
9	0.93834	0.795006	0.717704	0.562112	0.765839	0.600206	0.622229	1.37449	0.804424	0.475477	0.534434	0.610385	0.641058	0.67665	0.374586	0.311758	0.38663	0.800496	1.11859	0.599407	2.26407	0.700034	1.03134
9.33333	0.766254	0.895817	0.70522	0.515899	0.864635	0.656105	0.721227	1.77319	0.535516	0.684625	0.734456	0.501093	0.870772	0.808393	0.232031	0.344107	0.48243	0.673054	0.639032	0.698529	2.55349	0.758302	1.28141
9.66667	0.865557	0.843031	0.662237	0.866719	0.826564	0.804858		1.61332	0.431789	0.542419	0.802296	0.560828	0.73803	0.591816	0.434393	0.389098	0.415325	0.701602	0.647835	0.764992	2.42942	0.886611	1.09806
10	0.844418	0.752501	0.774511	0.648743	0.805078	0.510515		1.5585	1.14623	0.801943	0.697969	0.670938	0.816917	0.639105	0.520627	0.50532	0.287095	0.629606		0.721479	2.33334	0.709457	1.18363
