# Supplementary material for: Convergent, functionally independent signaling by mu and delta opioid receptors in hippocampal parvalbumin interneurons
Source: eLife. 2021 Nov 17;10:e69746. doi: 10.7554/eLife.69746 (PMC8716102; doi:10.7554/eLife.69746)
Supplement: Figure 6—source data 1. [file elife-69746-fig6-data1.xlsx]

## Sheet: Figure 6B
Time (s)	CNV-Y-DAMGO								CNV-Y-DAMGO + TIPP-Psi
0	4.20194	2.18301	-3.39602	3.94935	2.54744	-1.90804	1.83666	-0.74219	-5.6459	1.25574	-2.16492	2.96898	8.0186	-0.9891	-0.49085
0.1	3.76433	3.81953	0.474085	-2.81502	-0.38284	0.127634	2.42382	-2.41842	-1.93329	4.94711	-2.76779	4.72918	7.22837	1.62582	-0.81847
0.2	8.06706	-1.10786	1.28275	2.20113	0.470136	-1.7866	1.80576	-1.04917	1.79775	-0.03394	-5.26769	-2.44961	-2.90195	-0.03762	1.1519
0.3	4.95521	0.370184	0.208193	0.042762	1.10898	-1.04533	-0.78038	-2.00709	-3.91002	-0.91577	-1.37885	-1.97813	2.38339	1.72529	-4.16709
0.4	-0.66277	3.74912	-1.74634	0.801	-1.72689	0.904631	-0.0987	0.158729	-1.19116	-4.69583	-0.59201	4.43007	3.89399	-2.32896	-1.36818
0.5	7.5345	0.032216	3.84073	-2.60146	0.592902	-1.63648	0.739931	-0.64468	-3.08666	-0.66337	-4.97149	-4.02021	-2.72947	1.81679	1.78932
0.6	2.09643	-0.52437	1.47695	-0.60696	1.86184	-0.59914	4.59596	-0.98063	-3.51362	-2.07045	1.29288	-0.3876	0.677049	-1.73711	-2.11129
0.7	1.26594	1.79738	0.353236	-2.18363	0.704548	-1.36682	0.895225	-1.49692	-2.65925	-1.73215	-3.74776	-0.94454	5.05359	3.32156	-2.24108
0.8	5.78383	-1.37171	2.60781	-1.68898	0.560834	-0.52537	2.67893	-3.29801	-4.51121	1.54154	-4.9659	4.34672	-3.84557	0.185452	0.361638
0.9	1.35472	2.98893	2.50038	-1.35576	-0.02293	3.01216	4.75069	-4.33064	1.89886	-4.55621	-2.56814	1.70205	0.067371	-0.83482	1.23516
1	5.08985	-0.3342	2.05984	6.4962	-0.34012	2.58195	5.18333	-5.32289	4.33718	1.66293	-2.19151	-1.29344	1.46961	-1.00462	-2.95326
1.1	6.7076	3.86138	1.66554	0.182811	0.459553	-2.04947	0.228521	-2.61909	-7.51474	-1.95257	-0.51467	-2.05109	-3.82247	-2.88908	-0.53654
1.2	6.27722	0.482926	0.529092	5.09969	-2.22465	4.13504	5.96336	-2.49594	2.76007	-3.05703	1.35274	-4.86307	-0.87862	-1.33656	-0.46575
1.3	4.00135	-2.36765	0.091616	2.44032	-0.55583	5.00506	0.705736	-3.44257	1.56198	0.04328	4.16035	-2.9498	-5.02011	-0.2407	-2.71372
1.4	3.23904	3.9038	0.936132	4.21689	2.40784	0.430257	3.25313	-2.34097	-4.77601	6.30016	9.53859	-1.91613	-0.61197	-2.94575	1.02175
1.5	3.94413	0.389958	6.8506	1.4015	-1.13369	1.46261	-0.8023	-4.10886	-1.07643	0.06223	5.4921	-6.93268	1.66141	-2.12196	-2.94818
1.6	1.55907	0.681822	8.65271	2.53761	-1.29284	-2.70369	4.27594	-0.89939	3.81137	-1.0182	-0.78821	7.64796	-2.94656	0.94975	1.05153
1.7	4.10604	2.25064	3.7346	-0.20088	-1.26008	1.26767	2.15887	0.428655	7.35222	2.40535	-0.87027	-3.47724	1.21878	-3.12077	-3.83379
1.8	0.638787	-0.80296	7.34263	-0.84813	-1.58407	1.43489	3.67974	0.289781	-0.03426	-5.08198	3.90246	-1.44043	-0.77635	3.04968	-0.62565
1.9	5.4072	-0.66219	3.18763	-3.26331	-3.42013	3.172	3.18967	-4.55058	0.871275	-2.49135	0.488634	-0.55715	11.1476	-1.7804	2.18798
2	4.04393	3.25903	1.78595	-1.11884	2.65617	-0.79761	-0.30955	-4.38846	-4.19442	-4.03434	1.7676	1.93223	2.89594	0.792274	2.91016
2.1	3.02638	4.2553	1.14174	4.47366	0.087783	5.74764	2.75178	-2.63594	0.195278	0.509627	-1.42402	0.291034	-3.14292	-0.23882	-2.91851
2.2	1.46655	0.734154	0.289141	0.739155	-0.20209	4.04077	4.3577	-2.55357	-3.96932	-3.59248	-0.87049	-5.84918	-4.83615	1.37991	-0.99567
2.3	-1.54749	0.904275	3.98688	-1.79551	-0.27936	-3.39157	0.788679	-3.51952	0.274089	-2.09637	1.27399	-0.81966	-0.27315	0.945855	-0.86139
2.4	1.47772	1.02829	-5.29104	0.326698	0.687213	0.418064	1.77894	-0.22703	-2.4977	-0.64279	1.35224	0.028369	-0.07366	0.307126	0.642055
2.5	0.476918	2.31718	-4.05584	4.49976	-0.40194	1.44948	-0.23704	-2.13642	1.61709	0.110596	-1.21996	4.25208	-1.42651	-7.48758	-0.22413
2.6	-1.54824	0.404709	-0.43866	1.18707	-2.03886	-2.6369	2.50517	1.5321	-4.34951	-0.52638	-0.98848	-1.16977	-4.41518	0.369825	1.39245
2.7	2.29873	5.75991	-1.90563	1.45451	-2.13965	2.45726	-0.29313	-1.33763	-1.44395	0.217551	2.03455	0.340753	-1.89508	7.60494	0.546486
2.8	0.060128	0.687784	-1.79701	2.7048	-2.16496	-0.28227	-2.27471	-3.3705	0.540577	-2.25888	0.434444	-1.9009	3.54666	-2.0336	3.35972
2.9	2.04135	4.75302	-5.52541	1.3322	-0.63915	0.280566	-0.68794	0.006503	-4.08776	-2.65947	-3.70381	2.01936	2.48577	-0.51406	-0.32607
3	-2.51407	-1.9354	-2.56038	0.414069	2.43973	-1.4591	-0.29073	-2.55397	0.158182	-1.10027	4.48626	-0.43455	-7.96213	-0.85013	0.608071
3.1	-1.51277	-1.33767	-2.35743	-0.00129	1.82843	-2.29422	-1.73837	0.121711	0.707397	-1.72462	-5.64031	-6.83779	-1.01958	0.233318	1.6821
3.2	-6.97507	-0.5721	-0.64386	-0.96965	-0.86263	-1.25621	5.02058	0.203504	2.10002	-3.2168	-2.17722	3.34839	-2.6434	1.87029	0.96924
3.3	-3.45047	0.201681	-1.96071	-1.09087	0.713524	0.445907	0.96864	-0.29824	1.81995	-2.77281	1.20418	0.603401	0.754531	0.207786	1.6239
3.4	-0.76036	-2.26677	-0.38351	1.05123	1.84305	-2.72567	3.03884	0.673173	0.769631	-2.23433	-3.72187	-1.10127	3.90413	-1.78357	2.82593
3.5	-3.16168	0.032746	-3.96118	-1.38875	1.07279	2.26055	-4.54677	-1.25042	-2.47126	2.12003	-3.60537	3.86182	0.015067	0.298565	1.52684
3.6	-1.12145	1.39408	-2.07939	1.28937	1.53118	0.435165	3.51704	2.07912	1.12535	-4.9509	-4.59464	-0.65807	3.81393	-3.09052	0.945753
3.7	-4.01498	-3.3036	-1.78541	-0.75637	0.585087	1.58636	-1.78539	0.80099	0.430566	1.28627	-6.50369	-0.52427	0.774692	-2.12829	0.541725
3.8	-1.48676	2.80955	-3.74677	-0.46083	-0.15848	0.499825	0.211292	0.009946	-5.15802	1.54521	-6.3935	5.08773	1.49544	-2.56808	3.18223
3.9	-1.44354	3.48117	0.866416	-7.26842	-0.80961	1.20041	2.1802	2.18596	-2.51039	-0.04795	-2.83043	4.43972	-2.57099	3.6565	0.957485
4	-0.66939	3.65438	-0.262	2.97793	-0.20947	1.66964	-2.83631	0.203498	0.5063	1.39204	-1.89956	4.77778	7.71915	2.12229	2.99716
4.1	-7.08074	3.50048	0.354011	1.17535	3.57469	0.816306	-0.05004	-0.39588	-4.78553	2.40492	-5.60734	5.45867	5.20372	2.5999	-1.47989
4.2	-5.50328	3.92709	-2.96174	-2.02201	1.45038	1.57193	1.16294	-1.21531	4.23476	2.71618	-2.64511	-2.67925	-2.05668	-1.36716	2.15012
4.3	-4.09225	-3.24528	0.012078	-1.44707	0.131595	-1.69123	3.10621	-0.82105	0.511404	-2.98493	-2.70714	7.1683	-8.08141	5.46882	3.17324
4.4	-6.93123	-0.14903	3.64832	-3.04462	4.6841	-1.74896	-2.47346	-3.83246	-3.36283	2.34959	3.29616	0.8678	-9.69876	-3.27778	0.645849
4.5	-4.0058	-1.03503	-0.44281	-4.95638	1.30553	-2.70404	-4.69907	-1.80077	0.036051	-1.37229	-4.27781	9.76029	-1.35419	1.11594	-2.59486
4.6	-2.40825	3.11275	-4.77721	-2.55513	2.01438	-0.5866	-0.14838	3.14402	-2.02492	-4.97223	1.12921	4.17036	6.58884	2.78341	-1.84116
4.7	-4.75719	0.305788	-1.21191	-1.92217	5.87021	3.81893	-1.34269	-0.29338	5.97986	-4.48299	-2.29327	2.43472	1.60371	-4.54539	2.94731
4.8	2.14299	1.89953	-3.52648	-2.78777	-0.2449	-1.5661	-0.40172	-3.23991	-4.37785	-0.43794	-2.61471	-2.42806	2.77191	1.48146	0.862539
4.9	-3.04629	5.16486	-4.44412	-1.69365	1.56166	3.12596	-3.00266	-1.88491	-2.12657	2.33655	-2.68846	-0.70468	5.74306	2.67967	1.00172
5	3.1257	2.4006	-6.68556	2.21423	1.8986	-0.25978	-2.83307	4.25021	-1.6069	0.077568	3.95377	-0.06846	5.21748	2.75196	0.707909
5.1	-1.25225	5.4009	0.950139	-1.92582	1.99477	0.127855	0.555559	3.09722	7.30197	4.68266	2.61518	6.36717	6.36079	0.634539	0.639297
5.2	6.69638	8.10623	-0.49776	5.44298	15.1294	5.01745	-2.90046	8.11773	6.94312	5.7611	5.35259	13.0264	11.2845	0.010926	5.80671
5.3	7.05278	21.2476	2.48088	9.09452	30.7687	13.0824	3.11694	14.5505	9.50101	13.5443	17.4242	20.5981	15.1825	6.64027	7.18182
5.4	11.8767	23.9982	3.33669	21.0962	43.5231	15.2411	2.86987	22.7109	13.9327	22.1321	21.7263	30.7845	22.4043	9.9966	17.6224
5.5	12.885	37.9736	11.8252	27.7997	56.2802	22.5675	9.34976	27.3883	17.6324	28.0077	22.9763	39.7616	33.461	16.0861	14.2491
5.6	16.8108	40.2543	13.723	31.3326	66.6872	27.2391	12.8025	34.6379	22.8373	37.073	38.379	53.1378	31.1278	16.8217	21.6237
5.7	20.2243	50.0168	16.1885	36.9992	69.1576	26.2032	11.1294	36.7875	18.9985	39.5442	32.7274	46.9673	39.4931	20.8135	26.8968
5.8	21.6375	55.4651	19.5569	44.0819	74.5383	26.6718	15.3975	44.3398	19.9817	45.1592	38.1386	58.1178	47.5429	21.9453	26.8225
5.9	22.5159	62.1828	26.5543	43.309	75.5745	29.8652	16.6273	42.9996	27.4761	51.033	38.377	62.4054	45.251	19.032	26.6042
6	25.5636	60.4815	24.3367	47.9823	78.1399	29.8196	21.4313	48.7527	26.0908	46.9545	34.4081	62.9647	48.2504	24.2987	27.5817
6.1	25.0139	68.1599	28.3931	51.2061	76.7803	31.5824	19.8394	50.0759	25.6945	49.2155	38.0291	71.3226	50.4244	29.1899	31.7888
6.2	23.3564	67.4443	27.0378	54.8029	74.0433	33.7366	19.8851	52.7589	30.0435	53.1596	43.2628	70.4366	48.0938	27.1086	35.215
6.3	31.5856	72.1951	25.2313	58.1767	77.0564	28.9647	22.9588	50.5634	27.8105	53.3121	44.99	77.958	50.4955	24.8922	28.0833
6.4	29.8854	72.5079	25.9248	66.4558	73.1149	29.4363	25.1764	55.6756	31.5531	56.3967	44.4729	73.4957	53.5193	24.8803	31.919
6.5	34.1583	72.7551	24.4063	63.4579	77.3526	33.7199	25.3815	58.0137	32.7852	62.8751	42.312	83.546	53.9572	24.8833	31.2408
6.6	31.7497	77.0503	28.5907	59.3383	77.2398	30.2905	25.2075	54.2319	31.9379	56.2244	46.5375	77.7883	50.6819	28.6754	28.3285
6.7	32.9501	76.4839	23.86	64.9129	76.9593	38.0081	21.8044	58.2834	30.1708	57.2344	51.0246	82.526	58.5236	28.417	32.526
6.8	31.1654	78.6228	26.9478	66.0176	73.4812	32.486	24.4343	58.9837	34.3999	58.5713	45.4279	86.5801	57.4606	32.8767	31.9021
6.9	35.089	77.7433	31.4873	68.1719	77.3624	35.5299	25.9632	57.263	30.4316	60.5426	44.3845	87.0445	62.1302	29.8537	38.1369
7	31.5116	83.1868	30.6459	69.6468	74.8664	33.1261	28.5024	62.403	35.0688	65.5713	48.149	80.7806	61.0767	31.4425	38.7289
7.1	27.7666	80.1636	34.0353	63.4533	74.8939	32.0066	31.7847	60.826	33.0843	57.4081	49.3406	85.2716	59.2118	28.6582	35.1181
7.2	32.2399	81.3851	33.5816	67.523	76.5901	34.7661	33.1585	61.7482	35.6569	64.4847	50.7139	86.4543	59.5876	31.8462	34.7512
7.3	31.6679	80.6759	36.7068	69.7279	76.2717	29.3778	30.084	61.4686	34.748	60.4634	52.7947	90.4935	62.5722	33.7466	37.585
7.4	34.8746	80.9404	41.3074	70.4779	76.0715	32.7619	33.2039	55.8482	37.175	62.1173	49.9911	80.8678	61.0037	30.3207	37.7253
7.5	34.9072	79.6052	36.7972	74.2727	74.469	30.7071	32.785	63.7542	36.8075	57.9068	53.3233	91.5406	60.8363	29.0874	37.6571
7.6	25.8259	82.5356	29.2692	75.4375	76.5301	32.0695	32.1258	63.6383	35.719	63.4014	45.4589	86.9098	66.041	31.9684	39.9575
7.7	28.8566	81.4241	34.6219	71.5791	68.0535	32.5479	30.5807	64.3066	33.3874	65.6427	52.0285	87.8385	62.0425	32.0026	35.6425
7.8	29.9438	82.7116	33.5987	69.293	75.4674	31.6706	34.3472	64.7408	33.5465	69.2823	54.5293	87.0704	63.7108	28.3624	38.1189
7.9	24.4782	82.2416	33.4458	75.8306	73.8744	39.5114	31.6041	61.8769	33.3884	68.2709	51.5823	90.1066	66.3708	31.0484	38.8394
8	31.6237	89.7119	30.175	74.0015	73.2721	35.7242	31.2033	66.1358	38.2799	65.8326	49.2104	85.5427	63.6329	29.1237	36.6703
8.1	31.2039	92.0145	32.5978	72.6529	71.0425	29.3134	34.9057	68.1659	35.0462	64.7504	52.6274	88.7647	63.4961	28.5598	40.4136
8.2	24.572	88.0443	33.2349	78.2451	70.6045	32.4198	32.1032	65.4679	34.3129	65.86	55.6601	88.7244	63.1345	27.5786	36.3465
8.3	24.6756	90.9501	32.3232	73.417	71.346	33.3913	26.4951	68.4353	34.1331	71.6561	50.2506	96.2199	61.8864	29.0282	40.8989
8.4	26.7718	89.8559	31.9432	76.4485	70.4256	32.7216	29.7597	65.8782	35.917	65.0229	55.6327	95.6268	60.3227	26.658	34.6875
8.5	29.0168	92.969	28.3926	70.5922	72.7392	33.952	32.1912	65.9264	34.3138	61.1643	57.0311	92.7992	68.2179	32.5095	37.7525
8.6	27.5092	87.0531	32.5697	78.6561	73.5881	32.5361	31.9683	62.9067	37.2723	69.9994	56.352	100.21	64.461	33.38	37.9599
8.7	27.978	88.2372	32.2688	80.0809	70.8085	33.256	34.9469	66.1897	35.5891	66.4669	51.127	97.5741	62.1271	33.1365	39.2101
8.8	22.4732	89.3855	30.5177	82.3646	67.8919	33.8546	32.5124	64.3954	34.5344	64.8348	56.0742	92.062	66.7243	30.1413	38.6299
8.9	25.1414	90.9506	30.166	79.7533	67.5991	34.2356	32.6951	63.2117	38.6598	68.1487	52.3215	89.2323	64.0633	35.3409	35.8083
9	23.6596	92.4609	33.8278	76.359	70.6006	35.6465	35.0294	68.0599	35.2095	67.9178	53.4059	96.3666	66.5071	33.9895	41.0428
9.1	22.0803	85.3557	33.0645	75.8841	70.0006	31.8523	39.084	68.1345	40.7877	65.9931	49.4961	99.9256	66.1087	33.3233	37.5409
9.2	22.4881	90.7793	40.8222	79.4594	70.3163	34.8702	32.7229	63.9444	39.6866	64.0859	51.9094	93.5713	74.046	32.8995	41.0799
9.3	25.1996	89.8583	29.6381	78.4727	73.2576	32.2883	33.6489	68.6106	36.5442	65.1356	57.4289	97.3023	70.44	30.1229	37.1055
9.4	21.0072	91.5319	37.4741	73.2563	68.3266	32.3305	37.9291	67.3435	37.128	61.2753	55.3294	97.3282	65.6937	32.0065	39.2802
9.5	20.3381	90.6668	34.6639	79.1388	67.6162	34.0392	33.4462	67.5777	36.8277	69.6589	50.1785	95.604	68.1103	36.1846	38.0853
9.6	16.2491	94.9833	40.4907	83.2836	70.1776	34.4148	32.0524	66.0294	36.863	66.5947	55.8212	96.4937	66.649	35.1125	38.188
9.7	18.8475	94.6622	36.0884	82.7413	67.8629	31.7295	39.1399	66.7873	40.4826	66.0627	57.0605	99.8175	67.7634	34.4785	37.77
9.8	21.4226	87.4037	37.8714	82.1017	67.0968	33.7942	37.0382	66.6336	37.4133	70.5033	59.8729	94.593	70.305	34.3096	41.418
9.9	18.0579	95.3401	41.2411	80.4489	71.1914	33.4385	39.9685	69.0394	38.4237	65.6581	53.5961	98.6355	72.2052	34.1707	39.5646
10	17.7958	91.3531	32.8124	79.7877	67.0155	30.2502	33.3047	67.3582	38.3205	67.8826	58.3091	100.142	71.4753	31.4462	42.1834
10.1	19.4135	92.7598	34.7807	82.049	69.0245	39.5135	34.0927	67.8121	46.5292	67.278	62.6293	100.99	73.7923	28.4601	38.4876
10.2	13.0396	92.7989	35.5667	77.5252	70.5501	30.9209	42.0031	68.9386	35.9382	67.4485	51.3107	94.5351	72.7259	31.2879	40.7208
10.3	20.8512	93.0181	33.4916	79.6298	68.2853	32.1221	35.8095	69.1111	42.4074	69.5791	52.7121	93.0965	69.9356	31.6714	39.9255
10.4	21.3609	91.6678	38.1528	82.6543	68.1275	30.5648	36.7261	67.5474	39.0224	66.0158	58.7709	89.9754	67.5337	38.8218	43.3288
10.5	23.9855	91.8535	35.9276	79.6088	65.3574	32.1607	36.6078	68.5719	34.9406	64.9518	54.4069	90.9795	72.4199	33.2983	44.5025
10.6	24.7064	96.4572	34.9256	85.6015	64.8406	30.3779	34.8971	71.4073	44.3645	63.2515	58.4025	90.4121	68.1128	33.7026	41.9784
10.7	20.9502	94.6554	30.4776	81.2345	66.3576	32.2203	33.5167	69.9926	39.3844	68.0783	51.6699	97.4544	67.7434	36.2391	42.655
10.8	23.2182	89.5845	31.9818	79.5885	64.0207	32.7108	33.944	72.4077	42.4148	74.3801	53.6693	96.1767	69.7761	31.7551	42.5211
10.9	21.4065	88.552	37.8045	81.8097	64.1955	33.5687	35.6968	68.0547	37.5381	72.6362	57.6259	90.5977	70.0055	31.9721	39.2909
11	26.7626	93.6205	34.6104	80.4099	67.2157	29.6562	30.5638	69.1244	37.742	70.8082	53.22	94.7005	64.1582	36.4323	41.7259
11.1	19.2347	96.0727	36.4353	83.1011	66.3662	31.4411	37.1256	68.4628	33.3752	70.212	57.4757	92.7789	60.1163	34.3857	40.1616
11.2	21.5942	96.0044	37.0632	80.654	66.4931	32.2733	33.7419	69.9736	34.8303	66.3771	52.9442	94.5934	65.0266	31.2962	35.7101
11.3	16.1876	97.734	38.1912	83.7074	66.8415	33.3285	36.5159	69.0942	34.9972	67.7196	59.5314	91.1081	70.2191	32.4941	38.6555
11.4	23.093	92.9626	32.1252	82.7669	67.7784	26.837	36.8511	71.1777	35.9017	65.7129	57.8636	90.7388	65.2431	30.6799	39.4018
11.5	22.692	99.0168	37.6449	82.3614	70.1528	30.8337	30.2713	70.4437	33.7415	68.4999	57.7147	95.9533	70.369	32.7463	40.8387
11.6	21.919	94.9315	38.4167	79.3004	68.7676	32.3028	34.4436	66.5756	34.1619	71.3577	53.7328	89.3723	66.9095	37.8734	40.6434
11.7	23.3431	95.2382	35.9238	79.5329	68.215	30.6329	37.3028	70.5921	36.2929	67.7598	58.3962	92.5509	69.3925	34.0575	39.0199
11.8	25.8379	97.4736	35.9418	82.1563	70.1145	33.6301	32.0369	70.9744	38.1123	69.2749	57.5897	91.9219	71.9505	31.8796	36.6954
11.9	20.6624	96.2475	35.4386	79.9721	65.5897	30.3065	33.7667	67.9085	36.9073	71.2591	55.1442	83.691	68.0544	32.3365	42.1756
12	24.0448	93.2201	34.4701	79.1082	63.6244	27.8092	31.0058	69.6517	33.2851	66.3813	61.0376	93.73	66.5182	31.6149	41.9183
12.1	20.6623	91.6738	35.116	73.6852	63.944	32.8341	35.7318	64.6926	36.908	71.8996	61.6489	98.2855	63.879	34.2024	37.9152
12.2	21.9097	95.277	35.1457	77.7142	64.7152	33.9816	35.461	68.1642	35.8236	66.544	58.0697	96.1216	64.7688	31.3177	38.9702
12.3	24.5652	96.1676	35.3531	78.6221	64.1397	27.7083	34.8409	70.3879	31.6484	63.5126	56.4746	96.9589	67.4636	32.6399	43.2627
12.4	23.4345	98.0169	37.7991	80.6069	65.7568	25.6487	35.4078	70.3193	32.3167	68.5982	58.9042	93.2369	67.9642	34.5197	39.3371
12.5	25.5444	92.4075	37.3137	73.9841	64.3684	30.2747	35.0401	68.5741	33.1294	68.2184	54.3519	93.9426	73.1336	32.4106	43.0913
12.6	21.3406	93.827	37.078	76.3956	64.112	30.0665	32.3959	70.1816	33.8029	62.454	53.8925	96.826	71.4307	31.585	45.8049
12.7	24.2718	98.9761	33.5358	78.9297	60.655	29.2444	33.9852	68.2409	37.8469	65.8297	52.6728	96.859	68.7309	32.8583	42.3951
12.8	28.2255	98.7337	34.9599	84.6299	63.8398	27.1823	30.9207	71.2396	34.4397	67.0121	57.7767	89.1327	67.4755	29.396	43.8593
12.9	19.4011	92.8094	37.5804	78.817	65.0282	27.7122	33.1206	68.3184	29.5988	68.1088	57.8293	90.124	69.1195	31.7649	40.1907
13	24.3173	95.3618	38.7019	73.9876	61.0592	29.198	35.2755	69.246	39.6788	62.198	61.0921	91.3307	73.4349	35.8393	46.596
13.1	24.2306	95.4049	34.4387	80.0012	60.8002	26.7029	35.2751	70.2378	34.0594	65.3195	53.6314	93.0584	69.6174	35.3097	45.2114
13.2	18.0786	98.3385	36.0676	79.7206	63.6086	29.7646	36.2879	69.5346	31.9634	68.555	56.0818	91.3455	66.8272	31.7766	40.4299
13.3	19.5643	98.6496	38.8129	78.7757	64.6568	28.3579	36.8483	67.6498	33.2777	65.8512	55.5688	93.6429	65.8502	30.8242	42.3574
13.4	24.8061	93.3719	42.2081	82.2329	60.1052	25.0587	35.2831	66.4204	31.4727	73.8408	58.9366	96.2424	68.0361	32.1689	45.2578
13.5	24.4339	93.1411	37.4205	79.4453	62.8079	29.4607	30.7472	64.2738	33.5529	65.3623	52.4749	87.2998	71.4732	32.7776	42.2098
13.6	19.8581	92.1076	39.1403	76.5132	58.3812	25.9291	34.9644	66.7733	29.2743	68.9602	53.1176	86.5733	70.2739	31.8519	39.6978
13.7	24.3815	93.7903	37.1011	80.3764	59.7184	30.9475	36.11	67.1529	42.0157	70.1445	53.4628	88.2128	72.4849	33.0714	41.6566
13.8	24.8842	94.4515	36.5534	77.164	59.2781	26.7777	33.2068	68.4883	37.386	64.0606	52.3808	93.5913	67.965	34.4514	41.1137
13.9	22.5965	94.5302	37.2664	81.623	61.1387	29.497	32.4142	63.9379	35.7779	65.5026	45.313	95.3751	64.4097	32.5119	40.4188
14	23.866	97.2315	34.2873	74.819	57.4233	28.9669	34.3765	65.7919	30.795	72.0532	51.2722	93.5079	66.26	32.7715	45.6811
14.1	19.9188	98.191	38.3249	77.9137	58.5971	27.9425	32.799	65.7674	31.5857	66.2906	48.4366	85.6122	62.3323	33.5326	41.9151
14.2	24.3321	94.5712	38.1419	76.2559	60.0905	26.0988	32.8683	66.0589	34.7187	62.131	50.8271	96.6206	64.3258	33.5059	42.8915
14.3	15.781	93.6646	34.5203	79.8225	58.3722	35.5439	33.3443	64.9707	31.4723	66.5703	51.3672	91.9936	69.51	32.7492	42.2702
14.4	22.5627	99.5909	34.9249	78.3782	58.9916	25.5616	34.5223	62.5747	26.755	61.9951	53.7325	93.5794	63.7105	34.4633	43.9549
14.5	22.0132	96.868	35.2188	82.8267	60.4319	27.1606	36.4146	66.0251	28.4933	64.3895	59.2364	94.7376	66.5249	30.9109	43.4963
14.6	22.312	96.0985	34.0589	76.7545	57.5107	29.6833	36.7402	62.7268	28.1745	68.2556	54.8763	88.5322	64.3046	32.4267	42.6272
14.7	21.1684	97.9604	34.596	80.6609	55.2657	28.5588	35.7281	59.0008	29.2979	67.5492	54.4698	86.3341	63.2781	34.8286	43.4127
14.8	21.174	96.7187	33.5269	77.0965	56.7876	29.6131	38.4933	58.2208	32.417	62.9344	57.2278	92.0848	68.4337	34.0509	42.7833
14.9	22.9531	94.0948	38.7696	78.8962	57.0791	27.5917	35.8019	65.7079	26.8375	65.2862	55.8625	83.6913	66.437	32.4738	42.9259
15	25.0564	91.4258	32.7885	79.4906	58.8099	26.3037	32.3544	58.9222	31.4683	66.8092	52.6184	90.0506	61.9103	31.5381	42.9311
15.1	22.7349	99.0582	34.7718	79.9588	57.5696	29.4621	36.8865	64.3782	27.5642	65.4784	50.9328	91.0415	65.5654	30.8593	41.6125
15.2	20.8117	96.6445	38.3492	77.9664	59.9361	32.193	31.2053	62.1899	29.0029	65.0767	49.4024	87.5117	67.6539	36.0593	44.8509
15.3	23.6282	92.866	36.1555	74.9358	57.3025	29.4504	31.681	62.813	27.9334	62.3392	51.2538	90.9674	63.2676	31.1133	35.4633
15.4	22.7917	96.2804	36.9155	78.0643	58.0644	28.984	35.6846	62.8938	28.1803	64.943	56.152	88.3544	69.2405	31.9382	43.6026
15.5	25.5861	93.594	35.3852	78.6168	56.0319	29.7058	33.6839	58.9229	28.1905	63.6904	55.9916	86.3551	65.608	32.2933	37.4952
15.6	20.8022	89.225	32.0079	74.8573	56.1404	29.4503	30.3056	61.4716	24.7355	67.3564	54.0059	86.9488	67.9112	33.6827	43.0904
15.7	18.3207	91.2108	39.2768	75.294	56.7382	27.5602	33.2151	67.3396	30.5116	64.7355	53.9004	85.3133	66.7035	30.9862	40.2722
15.8	21.3964	91.3867	38.366	77.5738	53.3151	28.7279	32.4107	64.2063	26.9833	65.4325	52.0049	89.2759	67.6422	33.5652	40.8292
15.9	20.7116	93.8227	33.2655	82.1949	59.3872	33.1107	36.4716	65.6001	22.4456	64.1587	54.9948	84.9548	65.7739	31.4268	38.4381
16	21.98	96.4855	41.2854	78.479	56.656	30.764	35.901	62.1237	22.8172	64.0962	55.8516	87.1723	62.0088	30.9414	39.215
16.1	18.9929	96.6317	40.2969	78.3797	51.7832	30.0478	33.2552	64.1943	31.5452	61.6364	56.9382	88.5568	64.2798	32.7599	39.9398
16.2	20.7368	98.164	36.7451	74.7493	57.6394	27.5919	33.9636	62.4096	30.1173	64.1984	55.464	91.1415	64.6686	32.5788	41.7028
16.3	24.4929	99.0199	35.658	77.298	57.6776	27.8603	32.2501	62.5326	24.2986	64.5853	54.9191	87.0853	72.8532	31.352	39.0849
16.4	21.0612	92.2414	30.8893	81.6693	56.475	30.0715	33.1764	63.7525	19.6306	65.1758	58.4091	85.3598	61.078	30.2364	35.5654
16.5	26.3131	94.8101	33.9174	73.4554	57.698	29.8945	32.4206	64.8321	27.0878	64.9755	51.1789	93.1795	62.4963	30.4225	37.6538
16.6	22.5913	92.4664	35.4683	76.7351	54.6371	28.8986	37.9396	64.7172	25.9352	62.2703	51.6335	91.0815	58.9874	32.7438	39.1688
16.7	20.9876	95.5832	33.0172	71.133	55.6075	27.8285	30.6475	63.765	19.8056	70.8175	48.7958	86.5435	72.0626	30.4946	40.0734
16.8	20.9737	93.9067	40.2403	72.5658	52.8522	28.8627	29.7344	66.7829	22.8529	68.1361	48.0847	86.689	59.5989	31.499	40.316
16.9	20.0877	95.6782	35.0217	74.9105	56.5972	25.6432	37.2471	63.8391	27.7965	68.1665	55.7157	88.317	62.1655	29.3289	46.1886
17	20.2851	90.6742	34.8004	74.5198	53.9596	31.0423	31.791	65.3829	25.0977	65.704	53.0024	95.1533	60.5972	34.4384	41.0163
17.1	18.2884	89.5855	33.2131	76.6731	52.5212	28.3905	32.4221	65.2741	25.7667	63.5555	51.102	79.498	60.6607	32.1039	40.2927
17.2	21.6538	96.9732	30.6835	75.6235	55.2831	30.3612	33.6983	66.1087	24.1475	65.8363	49.5454	89.6997	72.0198	32.7298	38.6224
17.3	18.6364	95.3635	37.3434	74.4847	50.8934	29.4888	30.7193	66.5894	19.3431	65.2005	48.6668	90.3579	67.3802	31.5821	39.2708
17.4	22.3902	92.7124	35.0099	75.3413	58.6505	29.7123	29.3822	65.1497	24.0273	64.1513	48.5561	86.5525	60.3279	29.297	38.2649
17.5	21.2078	94.2511	37.835	74.2029	55.211	29.1897	29.7839	64.575	23.4137	63.8413	54.1876	88.3712	59.2381	33.8251	42.5328
17.6	22.1888	97.83	37.8783	76.5868	51.6399	28.7863	33.5578	62.2717	20.0881	65.3505	51.9426	94.313	61.0657	31.8059	38.275
17.7	15.3268	93.7765	39.8274	72.9021	53.1652	27.328	34.2736	66.9112	18.9511	69.7452	55.1048	89.6292	63.6315	31.2853	40.0128
17.8	18.5091	91.0763	35.6893	78.2015	51.3611	34.0841	34.9403	64.1259	21.4705	65.2496	50.2914	94.941	66.8165	29.476	41.6897
17.9	19.9936	91.9398	36.493	76.8718	54.4742	29.3677	28.1723	61.3061	15.8445	68.9543	51.8695	86.5323	61.8451	30.2167	37.6961
18	16.8516	91.7083	36.2965	75.7004	54.1235	27.3371	33.0396	60.958	18.1788	63.0658	49.8613	89.2042	74.0378	28.4086	41.4077
18.1	19.7964	96.2892	39.3523	71.8023	48.6395	26.4402	32.6185	61.8175	25.5949	66.6968	51.3809	85.2021	62.3995	35.3095	40.3233
18.2	19.9986	94.625	41.1973	70.7549	50.0001	23.6529	29.7516	65.6717	19.4045	65.6594	50.1785	91.1387	60.1573	32.5356	39.1983
18.3	17.9804	89.9364	34.2536	74.3613	50.449	26.5858	32.6308	61.8187	20.2179	64.8145	51.4678	83.8324	61.0802	32.8668	38.3099
18.4	17.4498	95.4554	35.4629	73.2898	51.3826	25.4456	34.061	63.7316	18.8029	71.4002	54.7766	86.4428	58.739	28.1872	39.5472
18.5	17.5533	97.259	35.4939	72.5483	50.8642	29.9339	26.1165	62.4967	19.1064	69.5871	49.662	84.8884	63.8638	30.2847	42.7918
18.6	17.0047	94.0041	38.9203	71.0154	53.4055	27.4982	34.7394	64.3266	19.4343	67.8481	48.2168	82.3651	61.8241	32.3155	40.9539
18.7	13.656	94.3917	40.3538	72.0324	53.6078	29.9211	33.8508	62.2627	17.749	64.7418	49.5322	81.8226	64.162	33.6145	36.2459
18.8	19.6196	92.1679	35.4368	74.8106	49.3536	24.0012	33.2565	64.2781	22.4451	63.6854	43.8014	81.5472	57.9732	34.0699	36.3299
18.9	15.973	94.5345	39.5723	71.908	57.8477	26.5408	29.5619	64.8032	19.7541	65.2507	49.5891	76.3085	56.139	27.9616	34.7536
19	19.422	92.0892	34.8001	72.2331	52.6829	29.3496	30.9677	62.6264	20.9035	64.8884	52.6357	84.1224	56.121	33.0505	37.5104
19.1	18.7842	89.1154	35.5477	71.5409	53.3507	28.1086	25.1065	62.7004	13.9239	67.6496	55.3564	78.8702	55.3676	31.0817	41.1661
19.2	18.4725	86.7635	34.9327	73.1446	48.5616	31.6173	29.9893	62.7906	20.7936	66.5291	49.6985	82.1496	55.064	31.4009	40.9713
19.3	18.8037	88.0024	34.1217	70.9244	52.3856	25.7953	36.4341	63.3575	18.3395	60.8625	46.107	79.9887	59.186	30.7744	38.885
19.4	20.4326	87.7957	39.512	67.6951	50.7825	29.4717	34.0968	61.2898	17.3828	66.6072	54.5955	86.4512	57.5065	30.4349	34.4178
19.5	21.9183	85.4352	29.2055	69.3737	50.6837	28.7417	32.0647	64.8263	14.3695	69.2545	50.1912	82.6321	61.7558	29.7456	38.9778
19.6	22.9804	89.8975	36.1921	66.93	51.6849	30.5898	30.9073	62.1141	18.9176	65.6269	49.0444	81.549	60.8867	32.9523	36.9307
19.7	20.516	88.5584	32.7584	71.0002	51.3623	36.4483	30.979	61.2202	16.2139	66.6785	50.4252	81.884	59.6084	30.5531	42.2233
19.8	17.0664	89.0829	32.5809	71.5425	53.8166	26.4877	27.6813	62.011	16.7789	62.4644	47.6113	76.4094	62.3506	29.5895	35.9877
19.9	23.0197	86.5428	39.8358	66.8669	49.5781	31.2615	32.5064	61.5021	16.4466	63.7882	51.3002	87.7073	63.9543	32.3079	39.7523
20	18.1603	86.9142	38.9176	68.3269	49.7856	28.3316	26.0458	61.7597	17.135	64.2715	47.5715	82.7972	59.9176	27.2433	35.1419
20.1	15.9141	93.615	33.4074	71.9965	49.7702	27.892	29.6518	61.9579	18.0574	59.2599	51.9825	82.9052	59.2175	29.4767	40.2159
20.2	13.1636	92.1815	34.1292	66.9508	49.3619	30.4039	27.583	60.6217	16.5414	58.3516	48.7865	77.1699	60.368	29.6886	37.5022
20.3	16.8853	91.3808	33.7142	62.5312	49.0773	26.8627	22.7431	63.4402	10.2468	61.7267	54.1349	85.1828	59.9905	30.3949	39.1623
20.4	14.625	89.1393	35.4305	70.5158	48.3775	27.6463	29.2382	62.9895	14.7411	60.5103	46.4622	82.497	70.7624	29.2955	38.4193
20.5	15.8119	89.5719	33.8374	68.7245	51.22	28.4649	29.0658	57.4171	21.3409	60.5247	46.531	81.72	69.6032	28.7852	36.2952
20.6	18.8778	89.4366	31.6781	65.1586	51.3922	28.4992	27.5539	59.3359	15.583	61.6566	44.3992	75.7699	70.8702	29.2576	37.0158
20.7	17.664	87.8127	33.1638	69.1406	48.9188	27.4504	28.0862	62.6895	13.5977	63.6776	45.2151	86.3686	66.6314	27.9947	35.8068
20.8	17.0608	91.3301	38.4122	69.7773	53.1996	26.5163	28.2862	64.522	11.1597	64.5877	48.4332	80.2218	58.1286	28.2131	33.9742
20.9	18.1479	88.3393	36.0064	69.5616	51.5972	26.0114	26.71	62.2943	24.5653	59.9455	47.6796	84.9295	66.0324	33.6586	37.5521
21	20.7716	87.4637	36.7157	67.4833	46.922	30.5189	30.1229	61.867	18.3396	62.1673	51.1612	86.2779	69.8379	28.5443	35.5156
21.1	21.3065	87.9717	31.9652	67.7481	50.2806	28.2751	26.7973	58.5863	10.1191	62.5757	48.7097	76.5823	62.913	26.5275	36.6901
21.2	15.1294	90.9323	37.9835	64.5508	47.8522	26.5558	26.4984	61.6384	11.4407	57.1051	45.0355	81.8683	64.9257	30.0596	38.2024
21.3	22.4718	85.1449	38.6082	64.7267	49.4502	27.1686	29.296	59.2356	9.9592	63.3227	47.8744	78.5117	72.1589	31.1725	35.1443
21.4	23.2157	87.2985	45.0243	64.889	45.0084	26.3318	22.9813	56.1491	15.4002	57.1528	48.25	78.3382	71.6891	27.7913	36.7351
21.5	21.8692	94.3575	37.4457	64.7998	48.2964	27.5345	26.3972	60.9639	9.48019	57.2505	43.3601	81.2291	71.1576	31.391	35.7687
21.6	23.1146	88.4899	38.6946	65.4572	45.0416	28.1812	25.9041	60.7021	6.30725	64.2844	43.4927	79.4899	69.5749	30.6672	35.0667
21.7	20.983	94.7485	36.5222	62.2547	50.0506	24.0159	26.0822	59.4464	6.54687	59.8517	41.7609	81.875	69.0996	30.1555	36.1307
21.8	16.2685	88.2374	32.4847	65.5673	47.4844	26.9341	25.919	61.7964	6.40596	58.4921	45.9729	73.7849	68.1633	31.1169	35.9481
21.9	17.3255	84.0137	34.8904	63.5055	49.3803	28.0784	23.2269	59.5201	12.9098	62.9405	42.4561	82.3987	67.1344	28.5357	32.822
22	15.3998	90.2321	32.0159	65.1719	45.8939	29.0025	28.0747	60.1257	7.99474	61.7695	49.1665	80.4156	70.5894	31.8449	35.4244
22.1	16.0974	84.2495	33.3036	65.3917	48.4293	26.1526	22.6014	61.1057	8.02664	60.5137	45.5805	84.679	67.0147	29.6462	39.4143
22.2	15.8231	85.7732	31.9807	67.1589	46.3573	21.5051	22.8918	59.9144	11.9231	58.7095	39.7645	82.754	68.7095	28.6632	36.5505
22.3	14.4387	87.1936	34.627	69.2227	49.3717	26.0648	24.9191	56.3848	10.31	57.6191	43.9277	80.3959	71.5544	31.1915	36.8556
22.4	19.7783	83.7487	32.5007	63.1165	44.951	26.3195	26.9926	59.3152	10.6208	59.0709	44.0699	78.299	71.6001	24.5782	37.3811
22.5	18.5025	84.4736	33.2298	64.9223	47.2658	30.9505	20.3869	59.9529	10.411	65.5338	44.7653	79.1932	66.9444	26.8482	35.5552
22.6	19.6357	84.4539	34.2086	63.8897	46.9469	29.8198	23.9162	58.1669	7.71004	59.6921	35.1619	73.8612	67.6197	29.5402	34.7857
22.7	17.7006	84.345	35.5672	62.7155	50.3153	27.3077	23.5898	58.0277	8.60194	57.8977	43.5355	80.727	69.2879	26.3526	35.8384
22.8	19.2087	80.2252	29.4721	62.8759	50.2601	26.8404	27.7331	60.9292	7.67263	61.7374	40.5478	74.3813	62.9665	29.3904	40.1042
22.9	16.3251	89.9979	30.1175	62.8667	49.2845	26.8074	23.9434	62.7121	8.66834	59.0721	38.2568	77.2743	69.8797	28.9321	36.9065
23	14.4288	86.0493	31.1953	65.2673	45.1786	26.1018	27.7534	59.0415	7.11379	55.5127	46.4931	77.5862	68.8711	30.7891	34.5564
23.1	18.074	84.5556	25.4162	64.1335	48.6457	24.2562	24.4631	57.9468	4.45787	59.4434	44.5317	75.2212	69.8128	26.7416	32.0965
23.2	20.4131	79.1704	31.0785	66.0295	47.6584	27.068	21.7641	58.2433	5.5604	60.9049	50.9433	79.8386	63.5667	26.9319	38.804
23.3	10.6476	81.8386	30.0256	62.2192	44.6048	23.9506	24.7483	60.078	2.27979	58.1329	37.4131	75.2167	64.9019	29.3717	38.4096
23.4	20.2294	81.2813	27.7944	61.842	47.9957	28.8839	26.978	55.4988	7.53797	55.4766	40.1015	77.3015	64.8777	26.7482	30.9174
23.5	16.8246	87.6188	25.5136	62.3677	46.8328	28.5553	26.1876	56.1442	3.19453	62.2719	41.2963	76.6556	65.8409	25.1356	40.3223
23.6	12.0352	82.7414	28.4157	62.5001	47.1339	23.9803	27.7468	55.3537	2.99023	60.5113	38.8656	76.069	70.3685	27.3263	36.2782
23.7	9.91743	85.8593	29.7484	59.6013	46.9887	26.9322	24.7624	58.4103	7.50402	58.9164	43.5554	78.1409	62.8715	25.1442	40.5656
23.8	14.999	87.766	27.4421	60.838	47.3458	24.2021	24.9673	58.0313	3.35895	59.0098	48.7982	78.7546	68.4266	26.2899	31.6288
23.9	12.0109	80.0249	30.0384	57.9023	45.4067	25.1281	21.8609	58.1308	4.63227	58.9483	39.07	79.786	69.8429	26.7435	33.7043
24	18.5547	84.7174	23.6155	54.5817	43.1614	26.8682	20.8024	54.0553	1.15566	62.91	41.068	73.9147	69.0148	29.7208	36.4053
24.1	19.1033	86.7036	27.4674	59.4568	43.6156	26.5481	24.528	56.8253	-1.7465	58.9825	37.7481	68.6983	71.6371	28.6361	36.0849
24.2	13.4794	83.9203	26.0999	62.4101	48.0026	25.3179	22.5815	57.5799	4.41901	54.7513	45.3456	73.8404	70.0211	25.8256	32.1599
24.3	19.3939	85.5659	31.2619	60.3644	49.7257	28.6746	24.1703	57.6731	4.46366	56.8577	44.5726	74.5505	66.7701	27.2894	35.3702
24.4	12.5197	80.1321	28.3304	63.5725	49.9031	22.8297	23.962	55.966	1.89594	58.0581	39.1054	75.447	65.7168	28.4693	37.0357
24.5	16.5286	83.4699	31.5695	63.705	49.9345	24.43	20.2453	56.5119	4.07633	64.8213	35.6584	78.3893	67.8092	25.2928	34.4877
24.6	20.0852	86.7643	27.8702	60.5611	50.2653	24.7814	22.8866	59.1048	-1.56773	58.3391	37.409	79.7425	70.7658	25.0598	38.7305
24.7	15.6791	82.058	26.9874	60.3505	46.4745	23.9566	20.4884	55.6844	2.48527	59.6191	37.5971	70.2412	63.6479	29.4961	35.8078
24.8	15.9134	82.8604	29.3989	60.217	47.6102	25.4106	23.0938	55.2736	-1.41605	58.9855	43.5702	78.4345	68.0801	27.9128	35.7372
24.9	15.0346	82.9707	31.9684	59.7795	46.0619	25.8063	22.2791	54.3867	-0.83031	56.4846	43.3002	76.0244	63.28	26.1622	38.1377
25	11.0521	85.5576	28.4102	60.1502	49.9344	22.6734	25.3786	52.1765	-2.05809	57.6881	44.1258	76.2667	66.2251	27.6872	37.975
25.1	14.6066	82.7193	30.0728	59.2583	45.615	22.2419	23.947	55.2	-5.38578	60.7099	43.7492	72.0769	69.1772	23.7715	37.8364
25.2	17.9719	84.292	26.29	59.1235	44.4375	23.082	19.9938	56.9814	-0.19733	54.1858	41.3873	71.5761	67.8479	26.2635	38.3948
25.3	19.1583	81.1661	28.0084	63.5623	47.2225	23.8563	21.216	56.9246	-4.863	58.4582	39.8254	71.5377	68.6737	28.634	38.8305
25.4	19.654	82.6043	30.3137	59.1387	46.1545	21.5161	20.2955	53.8451	-5.51474	62.4049	38.7466	76.8027	69.188	27.3647	36.8062
25.5	15.4411	79.7568	37.2709	60.4328	45.4698	24.5458	20.8053	56.382	-2.15244	58.3303	38.6014	78.8931	72.3178	29.3611	38.0537
25.6	18.2471	84.8177	37.3025	55.3311	45.3028	23.2453	25.1843	55.0818	-4.29554	62.6718	36.7486	79.121	67.4003	28.6318	35.7798
25.7	17.5996	81.602	34.156	60.0709	48.7588	24.494	24.3148	55.2921	-0.97379	55.5494	41.1012	81.5156	67.1599	28.3497	36.0676
25.8	17.9591	83.1839	38.1982	60.9045	45.5703	25.0079	24.4083	56.0047	-0.25496	54.3241	39.0803	81.1429	71.8344	22.3662	36.2037
25.9	19.8624	81.8651	39.3557	63.4738	44.9987	24.1183	22.6554	57.1824	-0.99142	55.5217	44.5687	74.9264	66.6943	29.149	37.1469
26	18.9612	83.0453	36.0935	58.1468	46.3931	25.528	22.2727	53.9375	-5.67938	56.2654	39.8937	85.2275	68.6587	28.5595	38.3394
26.1	15.1601	83.4447	35.2914	57.9831	46.5581	26.4392	21.3613	55.2444	-7.10205	52.5516	36.2424	79.0093	65.7551	25.8722	36.0053
26.2	17.6728	81.9632	34.7016	62.3956	46.6916	25.9511	24.8153	54.1813	-1.67811	53.5767	43.367	71.3223	69.0436	29.9389	35.0493
26.3	15.9352	85.358	31.3628	59.6219	45.6954	24.4579	23.3698	55.9473	-5.66607	56.1696	42.2814	75.5336	71.3338	29.2882	37.7776
26.4	18.1973	81.1232	32.0577	59.3704	44.2073	20.5049	26.8057	54.5813	-6.58398	58.4435	43.5704	88.6086	73.4029	23.7948	31.3476
26.5	17.3747	78.9037	33.7601	58.2036	46.8528	22.0609	21.6028	54.6942	-4.709	54.9618	43.0552	76.1697	66.7581	27.6909	36.3382
26.6	15.9997	80.8987	34.0555	58.7484	43.2222	25.6736	23.4521	52.4905	-6.3782	52.9462	31.7819	73.7418	70.1794	24.6025	37.2131
26.7	19.2158	80.2196	31.137	54.9456	47.183	25.0675	21.5094	54.7828	-2.19534	60.3307	37.0473	74.7198	71.1034	29.1336	33.6246
26.8	13.406	80.6675	33.0146	59.3877	44.3543	22.3993	22.5835	54.2407	-12.8286	53.6332	36.063	75.4125	71.1821	27.0823	38.2288
26.9	16.3999	77.6021	36.862	59.2531	45.2348	20.1219	23.9137	53.6397	-1.43211	54.8171	39.4781	75.4458	67.5257	29.4513	32.5806
27	12.8639	81.9839	37.7987	61.5227	44.0866	23.4293	26.8607	53.2873	-10.7937	55.7825	33.5534	76.6725	66.8398	28.669	37.3145
27.1	18.7964	80.7803	36.0542	60.8717	44.882	24.1786	24.4586	50.9744	-6.55896	53.007	36.532	69.9931	69.7251	27.6492	39.3784
27.2	20.3038	82.0352	35.9507	56.1429	45.603	23.1545	27.2191	53.9064	-9.74811	56.1086	36.4466	70.4825	63.7185	27.1426	36.0479
27.3	17.3545	80.4277	36.4198	59.9102	44.0204	23.9548	22.2768	54.8391	-3.04167	55.0881	34.3655	74.4999	69.8977	28.2456	40.5515
27.4	11.3853	80.9064	34.1448	59.0051	43.3407	22.8422	21.4908	54.6267	-7.83406	58.3626	37.1932	72.7988	73.4589	26.1717	35.0446
27.5	12.9025	78.7248	37.5536	63.7379	42.623	21.7794	22.502	54.6189	-11.1285	54.7391	36.8877	68.8356	71.6829	27.3899	35.4908
27.6	17.3836	81.9625	28.5512	54.5775	43.4732	26.0174	23.1684	54.399	-8.52214	56.9298	35.5636	69.0625	73.8969	29.2228	37.5703
27.7	16.0317	78.9086	31.7951	56.307	45.6586	25.3952	22.2491	57.2354	0.084146	57.5841	38.1756	66.082	70.8384	26.0344	35.3202
27.8	13.5686	81.74	34.1945	58.6592	42.7872	23.188	16.9002	56.6524	-9.09136	56.0102	39.4732	71.629	70.0605	28.7988	35.6003
27.9	13.3425	76.6853	34.7165	55.7724	42.1008	20.3712	18.2562	51.9237	-9.71676	61.472	36.3995	69.6659	68.1898	24.2685	35.3188
28	16.8359	76.8024	37.6205	59.5808	43.6157	22.5217	23.6575	54.4659	-6.16781	57.36	35.3722	68.0754	71.0284	25.3129	36.1837
28.1	12.9811	78.989	26.7836	52.1147	40.2321	22.171	19.6654	55.2991	-6.56348	60.7822	35.8599	72.2606	70.0968	25.8542	33.4177
28.2	14.5216	76.9594	33.002	58.5252	41.9027	23.3435	23.4536	56.4364	-6.60141	56.6112	33.823	69.7367	69.7214	22.4279	37.3158
28.3	14.358	77.2932	33.881	54.7651	47.0927	27.0771	23.1021	54.3876	-11.4218	55.1904	35.3874	70.3478	67.4779	29.8465	34.8958
28.4	16.0885	78.5123	34.8753	52.1868	44.057	23.2236	22.8449	53.6506	-10.8467	54.7892	39.9154	78.7963	70.7476	23.3122	34.2771
28.5	15.5295	75.7607	31.4399	53.9596	44.9969	25.3558	20.8321	53.421	-7.0198	54.0393	40.479	75.204	70.4829	27.1318	30.4931
28.6	17.0789	77.3492	32.5668	56.713	41.415	22.4923	18.5922	53.7427	-6.95932	52.7407	37.5834	71.5193	68.1232	26.0646	36.312
28.7	17.929	78.4164	35.6815	56.5708	44.788	24.0822	21.2496	52.0242	-12.8255	59.8185	35.4011	69.8462	68.8986	23.9761	34.607
28.8	14.1681	73.4899	30.6011	57.2841	43.6773	24.5869	22.984	53.691	-14.0683	65.5074	39.6636	64.3383	67.6305	28.9258	36.8915
28.9	14.9151	76.5906	36.7168	53.995	42.9238	20.1071	24.9767	53.398	-5.71008	61.283	36.7983	66.7291	72.0633	26.7232	35.5797
29	17.5967	75.9077	39.3874	62.1081	41.3942	22.7861	21.8451	51.1204	-8.5837	54.4141	39.8437	64.6146	70.8399	24.7585	36.5298
29.1	7.74133	79.2654	33.4376	57.318	37.7798	25.4828	18.2702	55.4051	-10.4041	56.2766	34.2688	68.2756	66.4007	24.7689	34.4518
29.2	15.4501	78.7793	35.5408	61.6753	42.9043	26.1482	24.9517	53.5206	-12.3452	58.9832	41.2535	62.3691	64.7359	27.9545	36.539
29.3	17.6895	74.182	34.0664	56.7415	42.388	22.9844	21.4742	54.1773	-11.0601	52.9948	38.2453	70.6205	65.3084	26.5431	32.592
29.4	19.1886	77.8479	32.1074	54.2866	40.0061	22.2538	18.9591	53.1216	-13.3241	53.4049	39.3944	65.6297	67.4717	26.5388	32.2705
29.5	19.3826	76.9584	38.9051	59.1927	42.9409	21.4355	19.7184	50.5168	-7.44424	53.9569	40.6304	70.3945	65.3543	24.9358	35.5253
29.6	18.8903	75.4759	32.6809	54.9505	41.1614	24.5138	22.9694	52.5512	-10.319	55.0204	38.4445	64.4669	64.3078	26.9714	33.0645
29.7	22.4658	76.419	35.9672	58.485	40.6612	22.8459	20.738	52.284	-10.3944	57.2282	40.2031	71.661	60.7849	27.6812	38.2631
29.8	21.2579	73.914	39.8435	52.1226	42.7093	20.1319	21.4673	51.0879	-12.4143	61.9753	40.4138	68.6063	64.5956	26.5591	38.8938
29.9	17.8625	73.8888	41.8719	53.3021	42.3361	23.0968	17.8484	52.2206	-15.6587	53.1098	41.2165	64.3626	61.0674	25.6279	37.3534
30	17.5837	73.9604	37.8395	52.981	43.746	25.9289	21.2425	48.9337	-14.4326	54.081	35.39	68.5817	64.3932	26.161	34.461
30.1	19.2182	75.7061	35.2244	51.4519	40.3998	22.6832	20.6294	53.5712	-13.6658	55.9123	36.6392	64.9244	65.8864	31.1485	38.8669
30.2	21.7826	74.8713	34.1735	55.2554	41.9991	23.6761	19.2854	51.8593	-10.652	53.9227	37.6848	69.9835	67.5818	27.4232	39.6733
30.3	20.6411	77.6542	35.6871	53.5781	39.1031	22.1106	22.7208	55.683	-10.8635	55.4976	42.2328	67.2416	61.7891	26.4834	32.2379
30.4	14.5246	75.6212	32.9334	57.1028	41.6315	20.4247	23.2272	52.8691	-9.60774	55.2727	36.1789	65.4742	57.4685	26.5937	36.6291
30.5	23.5245	76.8899	28.3694	49.7018	40.5672	22.7414	22.7766	52.6693	-12.6413	56.1169	36.4474	69.3816	62.3832	26.4469	32.6459
30.6	21.4909	75.3525	35.0224	49.0243	43.3666	19.9701	19.2565	51.8907	-15.5918	52.6314	35.4193	64.4627	66.1636	27.105	32.1772
30.7	17.3828	78.3099	34.2891	53.3648	42.0419	22.552	14.9932	50.6184	-13.1361	53.8873	38.6833	71.211	59.29	25.9856	31.3802
30.8	16.2063	78.7578	31.5772	49.8714	40.5379	18.4614	21.5899	52.8241	-15.2514	52.0313	35	64.0267	61.7936	26.4959	35.8395
30.9	19.1074	76.1353	29.6639	52.3022	41.1409	23.3017	19.3828	51.4161	-16.7782	55.8574	34.9829	76.9129	62.0305	28.1992	35.7436
31	21.5114	70.4441	27.841	51.1584	39.1374	25.2232	21.3	52.775	-17.4324	52.1253	36.1089	70.5035	62.7773	30.0844	38.755
31.1	18.5272	75.3887	28.581	53.8475	38.9442	24.3972	22.3481	51.4001	-15.038	52.7402	41.0516	68.3591	63.8025	26.232	38.5027
31.2	18.3655	69.6552	27.4167	53.0897	40.1372	24.6228	18.964	51.5163	-15.7122	51.2146	31.1628	67.1995	57.9225	26.225	41.3152
31.3	17.7428	77.9842	27.8285	52.5244	39.0642	21.0222	21.1472	51.036	-14.9591	53.629	41.5356	69.716	65.7373	29.0981	33.8809
31.4	21.1489	73.3842	28.5958	46.591	42.2705	23.6041	23.4838	52.8011	-17.4314	53.4583	35.9211	66.3961	63.3686	28.7826	35.7936
31.5	20.9632	73.8669	31.8229	49.7175	40.6887	23.0243	23.3379	50.7827	-16.6534	55.0125	38.522	65.2415	62.836	24.3469	37.7384
31.6	24.7708	73.9186	30.0763	51.0718	38.0337	25.231	18.8673	50.3492	-13.7479	52.0359	43.6891	74.8714	66.833	29.6478	37.5851
31.7	19.6613	75.2827	31.0856	51.5358	41.6441	20.2043	20.9826	48.5125	-11.6815	53.6397	33.1317	70.3348	66.2746	24.7567	37.3696
31.8	20.6439	72.7706	28.3108	49.007	39.1918	24.5283	20.672	52.5656	-12.6532	53.0346	38.7957	67.5823	62.7507	25.7097	33.9278
31.9	21.1073	73.015	25.1953	47.9716	38.3416	21.953	23.9719	50.2222	-14.8646	49.9397	37.3921	66.7504	65.2884	26.0134	35.3114
32	20.6924	75.824	28.6565	51.4905	37.4973	24.6749	18.8249	47.0729	-17.2121	57.2223	32.5689	64.5763	64.1225	28.3862	37.9884
32.1	21.2737	76.875	24.9172	52.2821	37.5708	18.2409	20.2167	50.1101	-14.6281	64.029	30.3823	67.0076	64.2073	23.6521	34.3474
32.2	20.4129	71.9568	31.3728	54.0396	38.2386	19.7137	17.2399	48.2767	-13.1759	56.8405	28.3438	65.8173	62.8486	26.0907	36.5485
32.3	19.2698	69.1971	26.2671	52.8313	36.9204	16.5065	21.2083	50.2684	-17.8828	54.8925	35.1437	68.6493	63.9346	26.1211	32.64
32.4	18.9498	70.631	27.3406	48.544	41.5175	21.2009	17.0411	51.6863	-10.5826	52.7195	40.1258	68.493	61.6061	29.4633	34.3469
32.5	15.2638	73.735	24.2378	48.1932	39.6373	23.2713	21.3885	50.0303	-14.7207	56.227	31.3761	60.7941	65.66	27.2571	33.8113
32.6	13.4753	74.1082	30.0519	52.6075	36.6136	18.8915	26.0546	49.2374	-16.5934	52.7692	39	70.9753	63.7368	25.3723	37.3623
32.7	15.6666	73.0611	32.142	52.4817	38.4004	22.4342	19.0388	49.9318	-11.0324	54.9427	32.3394	63.7676	61.9679	29.3305	37.213
32.8	13.8823	74.0592	25.974	50.6886	38.0455	20.8841	12.5325	50.694	-14.3455	53.6187	33.102	64.4028	62.9187	24.5636	38.6128
32.9	13.4593	70.2759	29.6994	51.1475	42.4179	23.6192	19.0291	49.0216	-15.724	50.1277	33.3353	68.9036	61.9715	25.2299	37.5362
33	18.6966	67.4863	30.339	52.1337	34.4598	24.7683	20.0188	51.4333	-14.3519	49.3243	30.2633	70.3266	67.5392	28.0151	35.6478
33.1	14.2352	69.6019	26.0124	53.5	36.5627	25.2059	15.5345	51.5338	-11.4945	52.7911	34.9288	65.4767	62.7035	27.1908	38.3816
33.2	22.0706	74.4442	29.7816	48.7583	38.6445	21.0724	22.1114	51.8008	-16.0803	48.9459	33.3208	60.5402	54.9795	27.1616	39.2548
33.3	15.6803	72.9289	34.2144	50.2181	40.0578	23.4978	17.0991	50.9205	-16.7143	55.317	31.0404	67.0693	54.9373	23.4483	34.8777
33.4	15.1661	69.8775	30.0497	50.5685	38.6199	19.5096	24.2538	48.902	-13.8607	49.8673	30.1097	71.2157	56.3693	27.6435	39.02
33.5	14.2373	72.5323	37.0441	55.6632	36.6176	22.2075	22.2223	47.4295	-17.3208	51.1303	36.5388	62.8659	61.0201	25.2686	37.202
33.6	21.0081	65.712	33.2036	49.8525	39.075	25.9615	24.6068	46.898	-17.1688	49.1255	34.2109	67.4227	59.9096	25.3057	36.4818
33.7	13.0502	72.0227	30.5394	51.4958	37.5135	23.7458	15.4275	48.4248	-18.3127	48.5445	27.4238	74.0549	52.7703	25.753	39.054
33.8	15.8868	70.1597	34.1341	50.8145	36.429	24.017	12.7738	47.9953	-15.3143	57.6058	32.7841	72.9192	53.6894	26.935	34.192
33.9	13.5364	68.7375	30.3589	56.9896	36.7357	27.102	20.7729	48.2628	-11.4439	53.071	36.6219	65.8875	56.4125	24.3181	34.1491
34	13.5853	72.6673	32.038	50.8247	36.6851	21.6896	18.8914	49.79	-16.8963	50.3136	32.9993	62.6144	54.79	22.695	36.8448
34.1	15.2695	68.4235	33.4331	51.5138	35.3711	14.4335	18.7973	48.6876	-16.2505	54.5325	31.5144	68.9642	58.0009	30.0433	36.2609
34.2	16.4117	72.2042	33.8906	49.5212	39.621	21.2767	18.8013	49.6151	-14.231	53.4696	36.7468	65.5887	53.5375	27.1733	38.7257
34.3	14.6299	71.8196	31.9825	48.4863	37.4529	22.68	12.8676	45.778	-18.7844	49.337	40.086	64.2462	50.5962	26.86	34.9208
34.4	15.0012	69.0646	34.6016	53.7132	35.9487	17.1419	13.3071	48.616	-13.1243	54.6455	30.8512	72.3858	58.9378	27.9544	31.4476
34.5	18.2938	69.4401	30.352	49.8335	41.2601	18.9514	12.1916	43.3472	-17.0044	52.0265	35.942	66.5288	51.1703	26.6855	33.8172
34.6	17.1821	68.4921	33.7688	52.3152	34.5864	22.2898	20.3996	47.3002	-16.506	51.8256	31.7482	71.4821	57.6559	26.8098	37.958
34.7	12.5231	68.0189	26.0086	52.0628	40.6981	23.193	17.6032	46.5403	-20.6567	44.7954	34.061	63.446	60.3889	31.4975	31.9111
34.8	15.8651	70.4936	31.5303	52.2787	41.0013	21.7212	11.8914	48.5283	-15.0314	50.6674	33.7261	71.7472	56.7467	29.0953	33.7467
34.9	15.0847	68.9282	27.6795	52.8143	37.0585	25.5452	14.9476	48.4795	-13.1476	51.3027	38.2426	72.075	65.4422	27.987	35.5721
35	17.9934	68.6047	27.2785	53.1898	41.8763	18.6968	16.6281	47.5105	-15.1449	50.5284	31.0167	67.6947	59.2287	27.9935	35.894
35.1	11.4842	72.517	32.5689	51.4628	37.6029	26.2534	16.2274	45.6249	-13.6782	50.5113	31.4149	61.7764	54.8239	25.0255	38.1892
35.2	17.7953	70.1286	32.3628	49.0738	33.315	23.846	13.3105	46.9573	-18.0515	52.4741	30.131	69.5831	55.7442	27.7046	38.2084
35.3	13.8805	67.5762	31.4653	47.1025	37.1724	20.7794	14.9149	45.2343	-21.5428	50.9418	29.1636	67.1053	54.2666	25.0466	39.7408
35.4	13.3574	71.4538	35.0769	46.1282	34.9932	22.4235	16.0323	42.8459	-17.9664	48.4337	35.7843	63.7583	60.9256	21.0962	33.7726
35.5	16.6925	72.6965	29.8384	47.5067	37.278	25.069	20.4331	46.3081	-11.0376	50.894	31.4295	67.787	54.6341	27.748	36.337
35.6	16.0175	66.1128	29.224	46.9975	35.2333	24.8927	16.0115	47.9617	-11.4679	55.151	28.6789	61.8285	53.7965	27.6603	38.8269
35.7	14.9112	67.1703	31.9924	49.5268	34.5439	20.9363	19.2444	49.781	-19.5224	49.0067	32.3891	66.6865	60.9611	28.3914	34.4409
35.8	14.2444	69.9209	26.3815	49.5464	35.0702	18.4907	14.4591	45.9819	-13.3871	55.8941	38.4424	59.3658	53.8067	22.6615	33.0706
35.9	14.3681	64.016	30.0044	45.7772	35.2078	15.8131	17.2189	48.2318	-14.4203	49.6557	33.251	60.5699	52.3985	25.0792	37.6439
36	19.4225	65.962	30.9475	44.7307	38.2926	16.0639	19.8672	45.9932	-15.2419	55.8443	32.2524	60.9877	57.1661	27.2503	38.5506
36.1	16.1574	67.4964	32.3399	46.2155	35.5224	18.203	17.5274	49.7722	-23.37	53.3386	27.6975	64.241	54.5325	27.3275	33.2497
36.2	20.8567	67.4152	30.1485	48.6805	34.0539	20.2505	15.5526	45.5945	-22.091	45.5485	39.8508	59.8035	57.343	23.5913	34.6592
36.3	13.9854	67.4547	30.4379	49.9409	35.3886	19.2432	17.1612	41.6567	-25.7041	51.211	32.7719	73.6976	57.0786	26.0326	33.1478
36.4	17.1415	70.1381	32.8652	41.3237	34.786	20.5475	17.1538	43.559	-20.2183	49.7062	34.1148	62.4756	59.444	26.5757	36.0711
36.5	21.052	65.0103	34.201	43.2778	32.9108	20.0432	14.6545	44.6633	-19.7081	50.8109	31.1833	65.3338	57.8668	25.2434	34.8619
36.6	18.7061	67.3322	32.6957	45.8068	35.1283	21.3559	16.3121	49.6822	-13.155	51.5626	24.7289	65.0738	58.9994	27.5567	35.7868
36.7	14.893	67.4075	34.3784	45.4079	35.1287	25.0811	18.0953	47.6746	-20.6953	51.5975	26.8091	64.1193	58.0924	22.8018	35.203
36.8	18.9721	67.2347	35.1908	46.7778	35.1298	20.3148	13.6494	47.6047	-17.8913	54.05	28.7227	63.6605	54.598	26.1601	32.6173
36.9	21.2042	66.8285	32.4242	44.4767	36.0111	21.9279	9.29929	49.6993	-13.1604	55.5719	31.6694	68.6053	55.7346	23.7441	33.3445
37	20.5164	69.1332	32.6819	42.8318	34.5657	20.4885	12.4449	47.8146	-18.0909	51.2624	26.6823	64.3032	57.0294	21.6567	33.1774
37.1	16.1938	68.5074	34.3893	43.0969	36.3881	21.8851	16.1829	44.8863	-17.8608	52.1579	27.8508	60.5036	53.4799	24.3531	35.9867
37.2	20.8548	68.6061	32.603	48.9671	31.9554	21.2997	17.2342	45.7892	-22.1963	49.4129	30.3085	62.9239	55.584	22.9862	35.0341
37.3	15.2709	66.3653	36.5049	44.0357	35.8095	22.9677	13.3499	46.0329	-17.6768	51.2641	30.2067	65.9172	56.8959	23.2468	33.1184
37.4	14.9435	68.7383	31.6677	42.8853	31.774	19.7757	14.4164	46.0663	-20.3589	53.28	26.241	64.3956	53.7059	24.552	36.3441
37.5	15.131	69.2527	33.3426	36.16	33.6851	16.015	15.4469	49.2047	-17.3281	46.8383	28.6752	63.2359	52.9389	26.3619	34.7757
37.6	16.2232	67.4408	31.4679	46.0784	36.2534	24.0403	17.4516	46.8167	-14.7697	53.6554	34.1628	69.6543	56.3939	27.4585	34.9762
37.7	18.5482	66.7878	36.3358	44.7684	31.4529	23.3233	15.4808	47.347	-23.007	51.8494	29.3521	67.4846	52.4851	23.1112	34.8207
37.8	16.024	64.2728	30.7866	44.7559	36.3605	18.3306	16.931	46.9591	-21.6347	50.4411	29.5638	66.738	56.3433	28.5594	35.8181
37.9	14.4076	61.2858	33.4459	46.9565	34.005	17.858	13.9283	48.8909	-14.0348	50.6971	33.2215	65.1039	58.6719	25.1711	36.354
38	20.2598	66.9873	34.2474	41.1379	32.5101	15.2448	13.7544	46.083	-20.1476	48.5995	32.9274	60.4288	55.0908	23.3278	33.8393
38.1	15.8453	61.8462	28.3006	48.7482	34.1051	20.6598	18.203	45.0109	-22.4824	47.2999	27.8593	61.0526	57.304	25.1729	34.6533
38.2	17.0092	61.4702	34.1481	48.6147	35.0465	16.8354	16.7576	45.9631	-21.3956	47.8028	29.3375	65.6541	60.221	24.4857	35.2654
38.3	22.8889	62.9759	32.0129	44.1201	33.5992	24.1021	15.0311	45.8016	-23.8164	47.7519	28.4635	60.5487	59.7539	21.8362	35.9695
38.4	15.5553	63.7793	27.4624	44.258	33.0089	17.8301	19.4037	44.5526	-19.2768	51.8115	25.6748	58.8989	53.722	24.5092	40.3572
38.5	17.0011	60.2134	33.0917	50.6167	32.0649	22.6872	22.4661	45.5497	-12.7573	46.4325	21.372	59.8638	58.7529	22.3888	33.1093
38.6	16.868	64.1118	35.993	48.9664	30.4443	21.8116	19.051	43.9168	-20.1295	49.2811	26.9763	62.1206	62.5362	23.5306	34.0338
38.7	11.8202	63.4267	32.1202	49.6171	31.0673	22.5829	21.4091	46.8414	-23.4015	53.5922	28.2461	61.3676	61.0696	26.1575	36.562
38.8	18.2498	63.3515	30.4757	44.8851	32.1341	14.5703	21.0259	44.0971	-22.9338	48.5288	27.8942	60.4623	57.624	24.5957	36.6058
38.9	18.1512	65.2431	36.0064	47.1912	30.0894	18.0648	18.24	47.2944	-24.2047	50.5572	27.8508	59.4354	59.2783	25.3312	31.7142
39	16.9067	62.5451	31.5426	43.8685	33.7281	15.9008	13.6257	45.3578	-16.301	53.347	28.8655	64.7676	53.7886	28.6539	35.5601
39.1	19.2911	61.3184	30.2744	48.7566	27.5797	17.5599	20.7574	45.1274	-18.4547	49.6823	27.9474	59.8982	55.4244	26.9305	32.3669
39.2	17.2181	64.705	31.1163	49.6593	34.2175	18.8669	18.3133	46.2967	-19.806	48.0789	26.7849	60.7787	55.521	25.906	33.3091
39.3	20.0859	66.2711	28.6375	47.2257	31.4696	20.2655	13.743	46.2744	-23.9525	52.8688	27.8183	63.592	51.2786	22.732	37.0165
39.4	17.1566	63.0864	32.2814	40.7176	33.9787	18.3976	16.3995	45.077	-17.0143	50.8372	24.7274	53.7269	58.3314	23.005	30.5022
39.5	17.9923	65.9077	26.0019	44.8498	29.7518	19.2949	16.6897	46.7613	-21.0806	51.9151	24.1668	49.9981	60.1054	21.0845	35.1369
39.6	17.3063	61.4626	35.8031	43.544	29.2436	14.5424	15.5012	45.877	-22.5951	52.331	28.8255	54.906	55.4105	21.0595	34.586
39.7	20.4816	58.8675	30.1211	43.5514	34.8726	20.4885	15.5461	47.4572	-23.2402	50.9773	19.5954	61.5676	59.3125	26.4481	33.1208
39.8	17.8445	63.8671	31.9861	45.84	34.3881	21.0256	15.4167	46.5411	-25.2852	49.3433	23.954	57.042	57.916	23.2664	38.0351
39.9	12.795	61.915	31.5758	45.1452	31.6629	18.4331	18.4695	46.7492	-25.0375	45.7821	30.7239	53.8226	58.8198	21.2593	30.8671
40	14.932	62.5117	26.0168	47.9262	32.8824	22.6175	14.5651	44.1517	-23.619	50.1115	28.5995	57.9572	58.1607	25.2456	33.2379
40.1	14.5538	62.3413	33.2235	41.824	33.8578	17.814	14.3742	46.8313	-21.694	48.157	24.286	59.9636	59.0254	25.1809	34.2514
40.2	15.0148	60.5829	33.323	43.3225	34.1909	20.5791	14.4083	45.9474	-22.2681	47.683	26.349	61.5432	55.7014	24.6187	30.244
40.3	13.7756	63.9065	30.5125	45.8039	30.8161	20.3562	18.0691	45.3945	-22.3826	46.1469	26.287	55.2853	53.5027	25.8498	31.0222
40.4	15.987	64.2753	37.7853	42.2975	31.7006	21.8105	14.0233	46.4716	-27.1302	55.685	27.6464	64.6187	50.7749	23.2077	35.8324
40.5	16.6202	62.0522	37.6924	41.5409	30.5289	18.338	18.1972	44.6292	-23.6951	47.4477	25.7633	59.9014	46.6889	26.3423	34.4908
40.6	17.6222	60.1876	34.6565	44.8968	30.0491	15.9925	8.65478	45.1634	-28.0006	46.945	29.9334	60.1706	54.2223	22.0263	30.6575
40.7	17.4496	62.5807	36.1186	42.2307	32.8844	19.5322	14.3434	44.3837	-29.209	49.3222	28.4488	63.8474	54.4356	23.894	37.7332
40.8	18.6717	63.7301	29.2372	44.2572	30.9245	17.4722	17.5048	46.8057	-20.946	45.4486	21.748	65.2295	56.4689	22.5614	34.723
40.9	20.1108	61.9088	30.29	44.5675	34.0824	18.664	13.7983	46.346	-23.6334	48.761	20.6851	56.807	55.1978	21.4048	31.7551
41	12.2561	61.1162	25.9963	43.6385	32.2263	19.7266	15.966	46.9684	-23.3436	47.8197	19.5622	53.6779	52.299	21.9707	31.8468
41.1	11.3988	62.5239	23.1567	45.7637	31.4366	21.0938	14.0507	46.3624	-20.3604	45.9362	24.0319	55.1473	56.1793	24.2557	35.3876
41.2	18.9905	60.681	28.0212	47.3332	30.5876	18.5394	12.1656	42.9982	-24.8456	50.7922	41.9696	58.3972	56.7337	23.3534	34.6524
41.3	16.4504	61.2117	33.4313	43.1513	30.4343	14.1371	15.1944	46.3139	-26.6696	47.8604	39.924	53.7624	52.6709	23.1268	32.3835
41.4	16.9486	63.0106	26.2808	42.9873	33.7433	20.5397	13.53	47.301	-22.5885	55.4163	46.3725	56.845	50.8596	25.3758	34.0137
41.5	18.6842	55.7938	26.4372	40.0451	27.8259	14.3444	16.1652	46.2552	-25.608	48.5071	37.8428	48.6216	49.6133	28.1788	34.8037
41.6	16.8818	60.4307	28.743	42.756	31.2945	19.0972	12.56	49.2477	-24.129	44.8418	37.7595	63.1244	54.1239	24.432	34.8356
41.7	17.8483	60.9532	27.4461	38.4751	32.1769	21.8833	14.5945	47.9677	-19.4129	48.8958	36.5984	61.6527	56.7959	23.8759	34.6361
41.8	19.6821	59.507	28.7152	42.9471	31.8061	18.8601	11.3204	48.2048	-20.46	50.7434	37.7337	53.7533	52.6255	21.5959	30.2671
41.9	14.6259	56.41	29.3423	43.976	31.9667	18.1182	16.0979	49.5748	-24.029	46.7018	35.7575	54.9608	54.484	20.5097	32.4164
42	16.1773	59.7673	29.7083	45.0749	32.7601	17.5498	14.6529	47.5813	-26.3384	44.9485	39.5892	57.5565	52.1297	22.0314	31.7978
42.1	21.0612	57.1085	35.7935	41.8615	29.2093	13.7462	16.5524	47.2158	-23.9854	46.6766	37.1856	55.192	57.8202	25.4132	34.1967
42.2	15.3175	61.087	32.0376	44.7444	34.5507	15.6962	5.11297	46.2674	-24.5183	48.43	37.7393	54.499	55.9986	21.6554	37.7109
42.3	16.5002	58.8636	29.9165	40.3493	29.6826	17.7464	14.8523	45.8316	-22.9214	44.9307	37.1714	59.5538	47.4909	23.9825	35.784
42.4	20.0772	58.5993	27.0709	42.7022	30.892	17.3232	8.59119	47.0204	-25.6564	48.7651	32.1444	60.7421	54.9294	28.7855	33.6379
42.5	14.5347	60.3499	29.1562	46.9585	31.6741	19.0155	13.7822	44.5765	-28.1722	50.0651	35.5139	53.061	54.1052	21.6217	31.7672
42.6	16.9149	60.0352	28.5128	44.1861	33.4902	21.8749	12.88	44.0387	-21.2247	52.0757	36.6485	52.961	56.0995	25.4025	34.2684
42.7	15.4796	56.6175	29.1028	43.0122	35.9103	15.9801	17.8534	45.0334	-28.3224	43.6984	31.1045	50.8834	55.2351	22.4133	34.9147
42.8	22.2827	60.204	30.8973	45.973	29.8522	16.4904	13.9014	40.9352	-27.739	47.5701	32.2952	60.0501	57.4366	22.2177	35.2738
42.9	14.2165	55.3563	30.5417	39.7951	32.5372	14.9815	14.1277	42.9931	-23.9303	45.0807	34.0966	54.3918	54.569	23.3719	35.7491
43	18.7337	58.6742	30.2113	37.334	33.0428	17.3053	10.3154	40.7261	-29.1715	46.8215	30.3584	57.8076	52.5104	21.8184	33.9065
43.1	20.5921	57.3929	32.6005	43.5405	35.0309	22.3487	11.4361	45.5091	-25.0284	47.8643	32.8379	55.0136	51.3031	19.9184	34.5106
43.2	18.7859	57.3767	30.108	43.8153	31.6109	14.9378	10.8408	43.362	-24.4276	50.1654	28.4913	50.4374	54.4105	20.1934	34.6459
43.3	18.7225	56.3139	34.104	41.0192	34.4834	16.6394	17.3304	44.9814	-25.7815	46.5994	31.3053	55.9448	53.5948	22.9767	29.8287
43.4	17.4543	62.129	28.7222	42.1955	35.1931	15.0445	13.9022	42.6987	-18.383	49.2836	32.3013	51.4731	52.5839	24.5571	30.4573
43.5	16.0427	59.7842	28.6976	41.1074	32.079	16.3947	12.1675	42.0193	-23.859	45.7057	30.373	53.8427	53.6304	19.5656	33.5786
43.6	23.1876	59.4443	32.6389	44.4821	31.086	19.2017	15.5867	44	-23.6303	49.0754	27.9827	55.903	54.6836	22.0099	31.6795
43.7	17.6768	58.3826	31.5731	42.5093	31.1624	13.834	20.0305	43.459	-26.8518	45.5756	33.0301	52.9256	51.4755	20.5788	29.072
43.8	17.1649	58.3875	31.1707	43.1208	29.3586	17.2017	16.118	44.243	-22.7555	47.2908	27.669	53.7673	55.537	18.2201	32.8513
43.9	20.3668	57.2104	26.831	41.405	29.4437	16.7865	14.6561	45.6165	-28.275	46.9757	27.9242	55.7983	53.6079	22.8343	30.1546
44	17.6009	59.243	29.2614	38.5142	31.3854	17.459	13.7693	41.9955	-27.0024	42.0442	28.6081	52.3348	50.0518	20.3378	33.6698
44.1	21.0835	56.9993	29.4812	41.3262	31.5844	12.3207	13.2837	40.8381	-23.1164	44.046	30.3342	53.9083	55.4037	20.3454	33.986
44.2	18.6294	58.6318	27.4299	37.0006	32.0057	17.2483	14.8218	43.96	-13.5762	38.1548	28.6676	58.9175	52.5718	23.613	32.5737
44.3	19.1212	59.4434	25.5899	40.3517	31.9482	17.9465	16.0506	44.087	-25.8261	44.0108	27.3256	55.0245	52.5296	23.8556	33.9359
44.4	19.8771	57.7146	26.6585	35.9848	31.2604	18.4756	13.2162	41.9031	-21.2985	40.7297	29.7557	54.5376	51.3727	21.3923	33.0327
44.5	19.0989	54.4983	30.7604	39.81	33.9071	14.066	13.4622	46.5606	-27.7842	49.5505	28.9011	50.3051	52.9917	24.9208	28.5792
44.6	15.3838	57.7606	28.2394	37.3805	30.0752	20.5189	14.9442	43.3109	-27.6583	49.9606	26.0274	54.8954	52.884	23.2173	32.8129
44.7	18.7959	56.8816	26.9593	35.1447	28.3727	16.0274	16.0832	40.5119	-25.9509	46.6358	27.2303	67.1395	41.5862	17.7593	31.7594
44.8	20.395	54.9856	30.8446	33.7613	33.2143	19.5101	11.8523	39.9593	-25.2372	44.3364	26.743	57.4283	52.2091	18.4912	32.7094
44.9	11.0576	56.8783	25.094	36.7128	30.6429	13.7222	15.333	38.8668	-28.2118	42.77	23.432	54.6951	46.979	18.7717	33.801
45	11.1919	50.859	29.2759	38.7693	31.3517	15.491	17.45	39.1153	-29.7248	48.3028	24.477	52.2414	53.6288	23.3665	29.9395
45.1	23.3698	53.0517	28.72	35.6941	32.1762	19.6456	11.1291	39.5498	-25.2223	50.6229	23.8071	54.5935	55.7443	22.3679	33.9824
45.2	15.6477	57.5537	33.1291	34.3487	31.0437	12.1183	15.6601	41.8789	-29.1471	46.79	25.9569	53.8034	54.5733	20.1992	31.5554
45.3	14.7309	55.3881	30.0042	38.524	32.7968	17.314	12.5983	42.3999	-21.7112	46.1359	28.4106	52.9857	48.2877	20.246	33.7629
45.4	17.9962	53.1532	27.5407	39.0453	32.3949	19.756	10.361	39.4025	-28.8052	45.8282	25.5159	54.7035	54.2034	19.6694	32.1975
45.5	14.8278	54.9673	27.4329	36.6163	28.5704	20.8331	17.5134	39.3512	-28.6566	48.4817	23.1342	49.8773	56.7045	24.1785	35.8336
45.6	21.079	56.3976	30.7049	35.2434	29.0732	19.1687	13.7399	43.7034	-25.7059	46.0492	29.995	56.2957	52.3516	22.4027	32.0732
45.7	14.565	60.4498	25.7652	35.9584	30.6107	14.9494	9.97105	41.0073	-28.9727	45.8395	21.465	55.73	53.846	22.1966	34.5693
45.8	13.7114	59.2189	27.5708	30.6919	28.4039	15.3154	12.4884	42.1065	-30.7957	46.9205	22.6828	52.4995	53.3087	20.2707	33.8433
45.9	17.6323	54.6994	30.4533	32.792	33.2967	13.3568	15.9113	39.8694	-27.7917	44.7938	28.9381	52.5253	51.3327	21.5217	34.7894
46	16.8107	55.8122	26.2289	30.7827	32.3454	17.8157	12.568	38.2877	-27.3394	44.0717	22.8491	53.4664	51.9467	22.2938	33.3822
46.1	15.5053	58.3827	33.0119	36.4069	31.3295	12.9419	11.3017	41.3287	-30.9109	46.66	27.7209	54.6389	52.1615	21.5468	34.05
46.2	17.7061	54.352	35.1632	31.8456	34.8379	19.4962	7.74541	42.1759	-31.7048	44.4219	25.6959	60.861	53.85	22.9905	37.0589
46.3	15.6729	53.8967	26.7926	33.7874	30.6599	14.548	8.87962	41.63	-28.3436	45.1335	24.6117	52.7186	53.8857	20.8454	37.3141
46.4	15.8126	52.2156	32.9023	39.8255	27.3083	18.892	10.8131	37.0792	-28.2663	45.0944	31.0816	53.023	50.1503	21.5247	33.2063
46.5	19.3584	55.0483	28.7039	36.5697	29.6791	13.3028	12.6049	44.4671	-28.273	43.6566	28.7795	55.0989	53.8614	20.3155	35.9902
46.6	15.9989	57.7036	30.5591	36.4899	30.6784	22.8205	13.7334	42.1948	-30.68	44.95	27.5415	50.3166	55.7043	19.1348	36.6346
46.7	16.9444	55.5452	35.1163	36.6393	27.9795	16.0401	15.5923	42.8606	-31.4278	40.8849	29.0564	54.6098	49.4737	24.6563	32.3094
46.8	15.9506	55.4638	29.9743	37.6311	28.6349	15.9927	11.8445	39.2256	-27.7487	43.3983	25.961	53.5097	52.2751	21.7782	32.1194
46.9	19.1648	55.5632	22.4587	41.5922	30.9985	18.6642	14.0234	35.9966	-29.6376	42.9927	23.5776	53.5081	48.678	21.5511	33.4606
47	20.1214	54.573	27.6942	40.7834	31.1006	13.3769	10.5355	42.1954	-30.0055	43.4457	26.3347	50.0154	52.6585	20.6946	34.2426
47.1	18.4786	53.2861	28.525	39.1818	30.5441	15.3407	21.2242	42.1121	-23.0682	44.6492	18.2532	53.6301	52.341	17.5079	33.8378
47.2	17.506	57.2113	28.2728	38.8673	28.8973	16.5428	12.4571	39.4903	-22.5977	45.6904	18.271	53.4414	48.3389	20.5061	32.0382
47.3	17.0381	55.2873	29.3091	37.5062	33.0783	14.5213	11.3533	42.808	-30.4768	42.6963	21.9234	55.3215	50.3496	22.5969	34.1842
47.4	21.5874	53.01	29.1188	39.2974	28.204	18.557	9.00315	40.1427	-28.2	43.9201	20.0458	49.6881	39.1958	19.4918	36.8619
47.5	17.5171	56.9554	30.2934	37.3305	29.2045	22.1325	9.87903	43.8343	-28.7595	47.7782	30.5213	55.9182	42.1101	20.4623	31.6095
47.6	18.6589	55.2013	31.5816	40.8702	31.6231	13.4851	7.78971	40.2735	-27.5662	47.1274	18.1068	54.1762	43.8417	19.7049	33.3949
47.7	19.2852	55.1434	29.9005	32.7215	29.7468	17.2332	10.1274	43.0931	-27.293	43.8382	24.7317	59.8741	42.6345	23.4454	34.1454
47.8	15.6357	56.9907	31.8068	38.2722	30.9502	12.1966	8.4198	39.622	-30.1566	47.9181	21.6098	51.8737	46.6954	20.7423	31.5419
47.9	19.8665	52.4565	32.6148	34.5773	30.2832	13.7134	9.33883	40.642	-31.4594	44.0189	22.8974	52.8989	46.9255	22.5346	31.5031
48	19.6053	55.9733	29.8052	36.8035	31.2845	14.2559	11.9592	39.6425	-32.5565	43.9951	28.0298	46.9737	38.462	21.5551	32.9244
48.1	16.0895	59.5891	32.2193	37.2863	30.9628	12.5855	14.2535	39.2461	-30.0879	49.1772	23.1304	50.1669	41.4055	26.9147	34.0131
48.2	21.9848	53.6979	29.2562	37.2042	28.6541	13.6226	12.0255	39.857	-27.6501	44.1485	27.5561	51.3617	44.0274	23.8828	30.7867
48.3	19.5771	56.5772	32.2786	36.8481	30.7124	12.3659	9.37394	40.4953	-31.0147	49.7919	27.7366	50.742	44.0064	22.629	35.1966
48.4	16.8666	53.204	29.3421	34.3696	26.8064	13.4707	9.88803	39.9364	-31.8341	44.5929	17.7068	55.4005	48.1074	16.7794	31.8989
48.5	18.7668	55.0408	31.3083	29.0593	27.6409	12.9246	9.08539	40.5695	-29.837	45.3061	22.1466	62.4352	43.5074	19.1032	29.1995
48.6	16.0394	51.5917	29.4811	31.9512	29.439	14.2575	11.8359	42.1173	-29.639	43.8176	22.5352	51.3609	45.8545	22.2399	35.7359
48.7	14.3416	53.2251	29.4374	30.9139	26.3399	14.3031	10.0951	38.8181	-23.0038	48.4146	22.3173	49.332	42.0598	25.7502	35.697
48.8	13.7125	53.0255	28.3674	34.3885	25.0312	14.2898	5.15734	39.0899	-28.7043	44.2599	19.2832	55.1909	51.9447	22.4438	30.8432
48.9	17.4901	55.4272	32.3584	31.5687	26.3807	15.2088	6.89313	33.3945	-25.4302	44.677	21.9701	47.0682	50.515	19.4228	36.2118
49	17.2005	52.024	29.5354	31.8527	23.9033	15.4597	8.25085	33.2323	-30.3726	42.4753	23.7775	50.598	45.7952	18.2175	29.9816
49.1	16.2562	52.8338	28.7893	30.9625	25.3107	17.2453	2.36189	38.8078	-27.3307	43.3398	22.98	51.0935	37.4306	17.7597	35.3948
49.2	17.1124	56.5185	27.258	34.0098	27.7225	14.3499	3.80335	35.3528	-21.2458	45.4237	19.6477	51.8575	47.348	20.4462	34.1005
49.3	14.5712	51.5109	28.1046	29.7523	25.904	13.1288	2.44921	32.2715	-23.392	44.4204	19.9946	53.0669	49.2088	19.6719	35.0158
49.4	13.8312	56.874	28.4191	32.7138	28.5663	11.9387	6.21326	33.5723	-21.2971	40.7718	21.1839	54.0026	46.5304	24.326	34.7001
49.5	16.1393	53.5061	30.5554	29.6128	26.804	11.2718	3.63639	34.2453	-33.8561	42.6375	18.2766	45.7479	49.2697	22.4253	29.4903
49.6	14.1539	58.4762	24.792	33.899	30.1046	14.8922	7.95356	40.7156	-31.1252	38.313	22.5167	52.874	44.8053	14.9878	34.8527
49.7	10.7433	54.053	26.3011	31.7216	26.4848	15.0478	6.55868	31.3577	-25.5721	43.5418	15.9045	48.9519	46.9662	23.5351	36.3534
49.8	16.4827	50.0046	25.1946	30.8902	26.6364	14.6309	4.51866	35.128	-27.1299	45.0508	21.0746	51.3183	46.4144	22.0079	32.1185
49.9	13.3538	52.0915	21.0721	32.1962	28.2666	16.0771	9.5897	41.2248	-30.9919	39.9919	16.6285	47.4426	51.8872	19.2089	32.0752
50	13.8043	53.4317	26.4966	33.4946	25.3029	18.6526	9.43356	33.7861	-28.9931	42.6605	18.464	54.521	46.6018	17.9612	30.0541
50.1	13.2608	48.8425	27.8785	34.4848	28.4208	15.5303	9.46924	33.166	-31.2181	46.3048	18.1962	52.2229	47.1046	21.8705	32.3139
50.2	13.5735	52.6149	30.0362	35.6301	25.2092	15.1278	15.2596	33.6258	-28.5937	53.0149	22.6825	45.8361	48.6327	22.9873	31.3073
50.3	19.125	52.6121	26.1658	35.6208	28.9601	13.181	10.1299	29.2801	-30.2894	45.3508	19.3476	40.024	47.6445	21.3629	32.8372
50.4	14.4325	48.6343	28.9198	35.8398	25.2566	13.4626	13.7738	34.8673	-31.7191	44.4262	17.3601	48.1466	47.5847	16.5267	31.9868
50.5	15.2987	50.8105	26.8754	34.6076	28.2202	12.7419	11.0204	29.1232	-33.1638	42.7017	18.4896	49.0443	47.7539	20.2914	30.6058
50.6	19.1741	55.6529	32.5978	35.9971	27.7508	11.0185	13.3077	32.3387	-28.4606	39.932	16.7519	50.7432	46.2297	17.1461	27.0891
50.7	19.7721	52.6003	28.0635	34.3107	28.1586	14.8555	11.3784	32.4765	-19.7572	45.5264	15.3335	51.4471	45.76	19.7668	29.8805
50.8	16.4007	55.2223	22.5694	35.0864	25.0206	14.173	8.63739	35.5321	-31.1353	41.4211	16.9613	51.6854	49.8872	20.2566	29.9424
50.9	17.6189	53.7744	24.4131	32.716	28.2096	11.3373	8.05971	36.4337	-29.8169	42.7756	21.5049	49.8975	47.5102	18.7486	29.1394
51	17.5019	57.6508	27.3843	33.8598	28.8849	20.0733	1.69674	35.7491	-32.3703	45.2356	16.2936	48.8181	49.3752	22.6896	31.4824
51.1	19.6763	54.4606	25.2904	37.8285	26.3214	15.4892	3.17223	35.786	-32.5136	48.3827	24.3119	47.8969	45.2892	18.303	30.342
51.2	20.6028	53.4958	25.66	37.4369	25.3644	9.95363	8.91471	37.546	-30.4993	45.4337	22.829	50.2254	48.0048	24.0144	32.911
51.3	16.0749	53.8769	24.7741	37.3762	29.2274	14.1904	9.54622	38.6021	-35.198	44.4544	19.9753	48.5264	46.3127	19.032	29.2409
51.4	20.31	53.1773	22.3587	39.0788	22.7797	14.5277	12.2945	38.4631	-33.531	41.8073	17.4765	53.7464	44.2847	14.8864	29.1216
51.5	20.9218	54.9109	27.9777	37.8918	24.6315	17.57	9.60629	36.377	-33.8219	45.7166	20.3616	53.7537	45.4019	15.8752	30.5399
51.6	18.4495	49.8235	25.6063	38.6752	26.3543	15.0894	7.29664	37.5414	-30.2747	40.4997	18.1293	47.4772	47.0938	20.3542	35.051
51.7	18.1736	54.9902	23.7853	32.9865	25.9132	12.4876	8.63381	35.2946	-29.2216	45.433	17.2	46.6229	46.8769	18.4899	33.8684
51.8	18.2861	51.4736	30.9389	36.433	29.9349	11.9062	9.63169	37.021	-34.6788	44.6867	15.8207	49.1897	43.575	17.0066	30.9455
51.9	18.4733	54.7105	28.1864	35.5848	24.7719	14.5268	9.06178	39.0629	-30.4574	40.253	11.8803	40.9886	35.1731	22.3564	31.2494
52	18.6434	51.9278	28.2329	34.8002	23.2829	14.0975	10.9052	35.672	-32.5661	37.624	13.6846	49.8787	44.8859	15.3758	27.0265
52.1	19.8837	52.589	22.8283	34.4772	26.2235	15.051	11.6194	37.6497	-31.5348	44.6751	20.0319	45.937	46.8685	20.543	32.7288
52.2	15.6145	52.7392	25.6253	38.2712	28.2082	15.1861	10.6711	36.7005	-35.749	43.1992	10.6209	48.1142	41.4735	16.9343	29.8547
52.3	15.5658	49.9172	30.6514	33.9235	25.9357	11.9234	6.9675	39.4193	-29.0098	40.6223	18.8741	50.6986	35.2788	19.798	27.3366
52.4	15.7277	54.0826	23.5979	31.4571	23.315	15.6648	10.347	39.1958	-34.0388	44.0772	18.1202	48.5645	39.6576	20.7254	28.5835
52.5	14.9944	52.9385	20.6662	35.3549	27.2626	12.5998	7.13643	36.8966	-30.9188	48.2791	16.5057	53.9915	42.4462	20.1531	31.7728
52.6	18.9825	51.9892	28.9183	40.4739	24.6773	12.2778	11.1094	36.4397	-37.8637	42.7579	9.62374	48.3805	42.0886	16.5058	32.1111
52.7	20.322	50.2186	26.093	33.716	28.6642	11.8978	13.071	37.2418	-40.9637	41.8917	17.9187	56.5165	38.3454	20.1419	30.92
52.8	15.8711	48.9568	22.3115	35.1003	26.8956	7.5702	9.60352	36.22	-37.0455	42.9694	17.5649	47.9753	39.0798	16.4521	26.4179
52.9	14.327	49.2761	29.5809	37.591	27.9724	9.03575	10.924	38.1492	-25.6275	40.941	14.3124	49.0991	40.5216	19.8086	28.749
53	17.454	51.4496	21.3306	40.3002	30.5592	16.3236	11.5203	37.0022	-34.6416	44.3668	14.2186	53.6304	40.7435	18.042	30.6346
53.1	13.4528	47.7952	24.3148	41.5796	25.6379	9.30394	11.3346	36.3172	-34.3646	44.7757	17.6509	50.803	39.8707	16.8028	30.0875
53.2	13.4206	49.3514	30.5345	35.4376	29.1178	13.1983	12.0711	35.7383	-32.7385	40.6048	10.7468	50.564	39.2539	19.4971	31.0961
53.3	20.0176	47.8892	26.4943	39.7121	29.0106	12.1035	8.6243	37.4637	-33.9103	41.8012	13.9487	53.1996	43.0101	20.2932	30.5708
53.4	14.0151	48.981	28.4614	33.8312	24.3412	14.6118	16.7342	36.7363	-35.3567	42.8816	14.3678	45.7086	40.2853	14.6122	29.5137
53.5	19.2542	44.4982	28.5218	34.7108	25.6419	12.7027	9.46287	37.645	-32.9066	39.7488	12.5417	51.9857	42.9708	16.5223	34.6481
53.6	17.1397	48.3105	24.3016	40.3716	25.9688	15.5268	12.2063	37.7811	-38.4066	44.6666	11.7201	48.2351	41.2806	15.8125	32.5655
53.7	16.783	43.2795	28.3767	37.6717	25.1006	16.7333	12.9343	37.8424	-30.624	38.7665	17.0235	50.3206	41.7448	18.6002	32.4814
53.8	19.8995	47.602	26.1302	38.7039	24.9416	11.5378	12.5648	38.3744	-34.66	55.1331	16.9557	61.6759	45.961	19.6025	32.0054
53.9	20.1648	41.9723	24.7026	40.5294	24.9741	15.5817	13.1434	38.3224	-36.9497	42.5285	14.0505	51.8376	43.6897	18.7898	31.7291
54	15.1332	43.2993	28.4154	33.6635	24.448	14.292	11.5168	38.1699	-35.9674	43.7415	12.9093	50.8536	47.2564	14.3679	31.1267
54.1	15.6105	43.2228	24.3162	34.0804	23.5443	15.4293	7.45494	38.2501	-34.1635	37.0281	9.70555	47.4952	43.5569	15.3765	30.839
54.2	18.725	46.2624	24.3797	37.5363	28.8546	13.0829	7.56642	34.2429	-31.746	36.7256	17.27	49.4455	43.3677	17.1801	33.7793
54.3	14.0116	44.6357	33.9136	37.1034	27.2832	14.9179	9.89643	35.8092	-38.09	42.6017	6.8172	48.1558	43.7537	20.904	31.8666
54.4	19.9203	44.8086	19.9876	33.8451	21.6324	14.9812	10.0963	35.1678	-37.9165	42.2666	13.6883	52.3212	42.8457	17.0401	29.6394
54.5	18.1476	46.5596	31.875	32.111	23.439	13.1535	11.3167	34.2808	-35.4727	38.0364	13.5992	51.7129	48.7227	22.0063	31.4946
54.6	18.584	43.2032	24.0276	34.9387	23.1748	15.4758	12.6408	38.7391	-33.0155	40.7351	14.822	49.4498	48.332	19.6238	31.1041
54.7	16.5401	43.5527	27.9284	31.1787	23.8266	15.3381	8.16335	35.8176	-35.1046	43.4138	10.7553	54.5364	45.7251	17.3349	32.7191
54.8	17.1303	41.747	27.5203	32.3926	25.24	14.0492	12.3046	37.4758	-35.2914	40.721	9.45261	48.8842	43.329	18.1498	32.1223
54.9	15.6546	46.7241	22.7152	34.3998	23.7959	15.8777	9.65946	36.3282	-34.488	42.7497	15.8287	46.5473	41.3188	19.0198	29.3031
55	15.279	47.5023	24.0451	33.2264	23.9082	17.7549	9.41782	36.3791	-36.3138	40.0273	12.4985	47.7322	41.4163	15.585	33.2056
55.1	15.793	44.7639	25.7824	33.1746	19.8091	12.0409	14.7183	34.7507	-35.2009	42.5107	12.8499	46.1549	47.2271	19.3182	31.3308
55.2	23.9065	46.7514	27.3586	30.8263	26.2142	13.9182	7.98465	36.315	-36.3512	40.8854	10.3365	48.0936	44.0457	17.6831	29.52
55.3	15.2958	46.1706	18.0412	32.6849	23.0112	12.6532	5.85767	34.9318	-35.0661	49.2472	8.59223	45.0003	46.1469	17.0149	35.9466
55.4	20.2323	45.8778	16.6132	35.4327	24.0477	11.3684	9.60901	36.2785	-38.1891	41.5838	4.98339	51.643	46.692	22.5614	32.119
55.5	16.6176	46.8702	21.68	41.0902	23.4841	14.2116	11.8759	35.0145	-33.3178	45.3452	11.7276	52.9294	44.0488	16.1052	27.9631
55.6	16.0692	43.7451	20.9042	33.0819	24.7665	9.62755	10.6803	35.7833	-33.191	41.3155	10.7973	52.8391	44.225	19.3186	28.7038
55.7	17.2683	44.9921	23.1171	30.8799	25.0588	14.9211	11.707	35.1593	-42.0878	45.6049	7.35375	49.9497	48.1042	22.7932	30.6246
55.8	16.1286	45.8809	26.392	33.8761	24.1755	15.1276	11.9078	36.5764	-37.6967	39.3992	10.3495	43.0075	45.4894	18.8797	29.538
55.9	22.2107	47.8599	25.6064	36.2564	25.7696	9.47899	16.4134	37.6812	-36.4881	47.2788	4.65289	50.3298	43.4852	20.7097	28.0679
56	16.846	46.1009	25.6235	35.513	24.3574	10.9045	5.98758	33.471	-36.4641	40.7038	4.99798	43.6351	43.4427	18.2251	28.4241
56.1	19.2259	44.2991	27.4806	33.0805	24.7896	10.7631	12.8842	34.6105	-37.9344	39.2446	5.14913	51.106	39.6477	16.1089	28.7201
56.2	18.6955	45.3631	27.9699	39.3969	24.3574	11.4486	8.16025	35.7949	-36.9072	58.3915	10.1906	55.385	42.7468	19.2358	33.2676
56.3	20.9105	41.6662	22.798	33.7462	21.6586	13.3658	11.6049	33.876	-36.5089	45.294	8.1038	47.6978	39.31	17.9508	27.4712
56.4	17.6361	45.6523	25.1552	30.6959	23.2045	13.7683	12.7288	38.5923	-36.3546	43.4394	5.993	45.0752	41.4714	19.6072	29.5604
56.5	14.2814	47.1853	23.5674	33.1642	24.7239	14.325	6.97572	35.2392	-40.9794	41.6721	4.62786	52.5641	38.6233	20.728	25.9284
56.6	25.916	44.496	20.5091	31.6254	23.1022	8.80502	4.68233	33.5878	-39.8322	45.0094	8.99715	48.4061	39.5187	16.4715	30.4139
56.7	22.0368	44.7088	20.2379	37.1448	24.0165	10.9214	6.3437	32.5524	-39.8597	36.2963	3.69817	54.9307	43.258	15.2635	31.0021
56.8	20.7058	44.5538	23.4398	38.3246	26.6428	12.8	4.67614	34.7912	-40.2823	38.5444	5.84317	49.9562	39.8735	15.8719	28.4469
56.9	18.1968	44.0053	21.4857	32.77	22.9307	12.9057	8.92268	35.1475	-38.6857	38.6208	7.55899	46.9054	40.7587	17.3778	32.1298
57	18.5776	44.2178	21.0732	32.6765	20.8202	13.5019	12.2008	35.2059	-36.7416	40.8949	8.05391	42.9148	37.2827	14.7642	29.3319
57.1	16.8848	41.7295	22.6069	34.8866	20.8336	10.9698	10.0238	35.6176	-41.4066	41.7685	7.32139	44.1861	39.3614	15.7313	30.0731
57.2	17.5155	42.2299	19.0926	34.7596	26.0028	13.6938	10.7482	33.9862	-42.2411	40.5453	6.62838	43.9062	37.5647	20.9353	31.7499
57.3	17.7621	42.5341	17.7809	38.1951	24.5594	11.6057	8.86706	38.2568	-41.6535	42.9036	5.84046	44.0213	38.9162	18.8534	27.3107
57.4	15.0562	41.5818	24.2057	34.9614	20.026	13.9265	6.15715	31.1354	-35.8659	41.6753	7.1285	49.8645	41.3747	14.7724	28.2013
57.5	19.0279	42.7467	24.4341	34.7557	24.2683	12.4482	9.48599	32.699	-38.5617	39.3414	8.27626	52.0011	35.8836	14.6821	26.5264
57.6	14.9618	38.0508	19.4828	38.1264	27.9168	10.7569	11.944	34.2666	-43.0778	42.3342	7.82421	40.7317	39.3138	16.6735	31.071
57.7	15.0469	44.7632	23.5028	40.2698	23.0676	13.6803	9.46417	35.0585	-41.8663	40.1832	-0.06848	48.7945	42.8636	16.6897	30.764
57.8	16.3102	43.0293	18.9893	34.3643	24.4549	10.4817	8.53395	34.7218	-37.4908	41.6176	2.4601	44.642	42.8955	19.0301	26.3065
57.9	22.5209	44.716	20.766	37.5773	21.3141	11.2657	13.6676	32.2506	-42.4732	43.7402	1.08989	45.4533	39.0952	19.0642	31.2575
58	13.9649	43.4834	20.1098	44.2766	24.6514	10.8533	8.17341	32.5567	-34.5746	42.7842	6.36415	49.9113	37.7977	16.9189	34.7495
58.1	19.1921	43.0248	19.9847	38.4873	26.2793	11.2382	10.7247	35.0773	-41.6729	38.0508	7.5972	42.3989	40.0488	16.6011	31.0979
58.2	20.9725	44.3362	20.1478	32.6746	25.2182	10.8477	17.1333	29.294	-40.5643	43.2056	8.12351	45.4293	36.5071	18.1533	34.7876
58.3	15.8394	37.2858	24.9994	36.4493	25.3654	9.80373	14.4089	34.4267	-41.9054	40.7411	12.2333	41.9133	39.6335	18.6481	31.9876
58.4	17.1225	38.9538	24.4099	37.1736	23.8562	15.1694	10.3563	34.078	-40.0006	40.2176	7.10855	43.7797	36.4458	19.4403	29.452
58.5	17.9131	46.3401	24.0034	36.756	24.9317	17.1336	11.9749	35.2435	-38.7243	36.3539	4.19209	47.5809	35.1342	22.3603	27.6531
58.6	15.831	42.039	21.536	36.202	23.5336	13.2113	13.2545	32.4411	-37.1607	36.3499	6.46756	48.5477	31.2328	16.2745	32.5178
58.7	21.8558	38.2935	20.7383	30.2835	24.352	16.4745	10.2347	32.2355	-38.9228	40.2201	16.0693	46.3114	35.8984	18.5554	25.5223
58.8	13.1065	40.9023	23.1489	35.8642	24.6337	9.47936	14.063	33.4613	-45.2444	42.2244	37.8907	44.4925	33.8319	17.5218	31.4127
58.9	15.0176	40.8978	23.6747	34.6827	23.1396	14.432	9.50431	32.9892	-42.8521	35.9989	42.8599	42.6217	35.8669	18.3553	28.0615
59	18.3024	40.3202	17.5822	33.3021	26.1713	13.7727	8.457	34.9371	-45.1029	39.7369	37.7387	42.5846	34.363	18.6822	31.2538
59.1	19.5611	38.4309	21.9405	36.9161	24.9467	14.6112	10.3304	32.3752	-45.8637	42.547	40.5049	46.205	36.1483	20.7665	32.4535
59.2	21.9022	39.8103	23.3609	36.5941	25.5711	12.257	12.1574	31.5791	-43.1829	38.8061	42.0619	40.6478	37.4434	17.13	32.6532
59.3	18.4986	40.5877	22.1185	31.3087	28.4816	10.7269	14.8513	33.8894	-42.6375	39.9172	43.8407	50.6533	32.7707	18.6554	30.4102
59.4	18.8257	40.2672	26.0693	34.4718	26.404	12.357	11.4813	35.3347	-42.5918	43.4186	41.7902	43.4247	42.0971	19.1141	30.3605
59.5	22.4546	39.0561	27.7382	34.076	22.6268	13.1667	11.0204	32.5078	-38.7823	42.0053	40.7602	47.5446	41.2129	18.969	32.408
59.6	22.2748	45.2144	26.2087	34.7001	25.1957	11.6249	5.43978	35.8195	-46.7486	39.3928	41.8175	46.6933	39.1824	18.9494	29.6351
59.7	22.2163	42.3956	23.7585	33.9906	24.6938	12.2056	6.4738	26.356	-39.6667	36.275	42.3101	43.1526	32.451	12.4269	29.6362
59.8	18.985	38.0344	22.7614	35.0663	20.3532	11.8581	8.09885	34.3807	-40.4088	38.7108	42.6702	39.1942	38.1813	15.2801	33.2242

## Sheet: Figure 6G
Time (s)	CNV-Y-DAMGO								CNV-Y-DAMGO + TIPP-Psi
-1	0.711801	1.46946	0.837176	0.793711	1.28364	1.54066	1.01809	1.16197	1.07187	0.891516	1.04073	0.829575	0.842673	0.945832	0.682454	0.936627
-0.9	0.82276	0.927644	1.00628	0.983293	1.61995	1.17362	0.964971	0.600423	1.42411	0.995793	0.768017	1.12251	0.733767	1.09012	1.34404	1.03289
-0.8	0.815853	1.25673	1.20873	1.18163	0.606914	0.825178	0.773386	0.675164	1.17596	1.09591	1.0686	0.432033	1.20344	1.19829	1.19851	1.11993
-0.7	0.882896	1.34657	0.841118	0.620745	1.0907	1.34661	0.897289	1.46064	0.538169	1.01492	0.75279	1.42152	0.900655	1.43381	0.327773	0.988729
-0.6	1.1332	1.33608	0.938792	0.944088	0.630714	0.727243	0.498484	0.902785	1.12206	0.90527	1.26745	1.38366	0.758884	0.814629	0.710102	0.851016
-0.5	0.927213	0.571381	0.999369	1.14256	1.52565	0.878087	0.787474	0.62517	1.37627	1.20515	0.669676	1.37983	1.0401	0.79683	1.72327	0.989163
-0.4	1.19542	0.680859	0.724081	1.02989	0.77848	0.122566	1.34375	0.635139	1.34872	0.928628	1.01154	0.499469	1.13562	0.881169	0.679036	0.99336
-0.3	0.935009	1.20392	1.40069	1.8622	0.474463	0.791563	0.724612	0.553251	0.769113	0.986017	1.16691	0.89243	1.00411	0.919084	0.287427	1.08129
-0.2	0.769275	0.871356	0.787813	0.663686	0.910679	0.76527	1.63525	1.28425	0.618503	0.997249	0.975601	1.61499	1.13276	0.906968	0.174492	1.02321
-0.1	1.49551	0.613094	1.05845	0.93145	1.26639	0.87357	1.3885	1.33597	0.680923	0.961359	1.2699	0.62385	1.51124	0.908494	2.53761	0.945676
0	1.31106	0.722911	1.19751	0.846735	0.812428	1.95563	0.968192	1.76524	0.874301	1.01818	1.00878	0.800141	0.736751	1.10478	1.33528	1.03812
0.1	1.14432	0.84558	0.932515	1.61432	1.66987	0.210151	0.968317	1.51298	0.756589	0.737495	0.822444	0.964446	0.583117	0.903693	0.414631	1.18818
0.2	1.09509	0.596751	0.567707	1.37299	0.709255		1.01445	0.879207	1.28253	0.946481	1.17362	1.15552	1.07022	1.17505	0.453632	1.08388
0.3	0.731897	0.646886	0.859956	0.726058	1.57134	2.22471	0.844755	0.444088	0.75967	0.793144	0.799446	0.912828	0.609455	0.748532	1.46981	0.89115
0.4	0.994442	1.21455	0.221445	0.94218	0.45533	1.00696	0.54949	1.28787	0.662577	0.869873	0.853004	0.939106	0.575735	0.741676	0.106353	0.712923
0.5	0.7373	0.584026	0.528348	0.346272	0.404593	1.46251	0.630912	0.747445	0.119822	0.800777	0.602088	0.079063	0.830714	0.625255	0.102723	0.957593
0.6	0.743451	0.104644	0.706683	0.85188	0.523312	0.415579	0.577589	0.736172	0.193716	0.581946	0.667601	0.768666	0.971324	0.786414	0.255844	0.733081
0.7	0.603649	0.160584	0.446714	0.545182	1.16462	0.445614	0.568963	1.13245	0.153612	0.287279	0.299187	0.442393	0.498113	0.575832	0.246153	0.832294
0.8	0.474746	0.212194	0.5622	0.405093	0.291392	0.028657	0.780609	0.48925	0.847128	0.393765	0.622222	0.086799	0.344436	0.527993	0.249775	0.822212
0.9	0.725459	0.8968	0.131427	0.425226	0.260417	0.409415	0.276159	0.480022	0.269398	0.477554	0.334184	0.517072	0.674291	0.468982	0.242302	0.925896
1	0.773697	0.007658	0.307066	0.328907	0.526091	0.402642	0.307729	0.284284	0.127577	0.53638	0.412079	0.280724	1.14684	0.396543	0.372631	0.85905
1.1	0.34014	0.019153	0.187995	0.368699	0.425404	-0.02057	0.574916	0.302106	0.085704	0.431852	0.509196	0.123334	0.724117	0.546756	0.129239	0.431157
1.2	0.550513	0.002047	0.388549	0.113769	0.451841	0.030258	0.419655	0.552016	0.526835	0.661095	0.433407	0.146375	0.198875	0.799932	1.34582	0.798504
1.3	0.881747	0.333744	0.230531	0.450169	0.46731	1.93262	0.46205	0.306589	0.353654	0.335606	0.361341	0.422879	0.557559	0.642736	0.203452	0.62589
1.4	0.814544	0.025575	0.129711	0.395728	0.148034	0.5027	0.355831	0.105529	0.191516	0.438441	0.492806	0.160096	0.459045	0.550083	0.173483	0.710959
1.5	0.506742	0.505712	0.215323	0.365468	0.147672	0.084472	0.434621	0.561512	0.182628	0.441921	0.424682	0.662783	0.365332	0.408325	0.447767	0.617645
1.6	0.702462	0.014075	0.273802	0.496039	0.582007	0.072068	0.209184	1.07798	0.275609	0.585881	0.453451	0.76521	0.42657	0.449048	0.273165	0.856857
1.7	0.424437	0.068435	0.141733	0.435849	0.18842	-0.03574	0.36296	0.734001	0.640053	0.328038	0.28506	0.455453	0.258818	0.689973	0.162008	0.597557
1.8	0.460237	0.178376	0.39779	0.15431	0.515641	0.733234	0.273213	0.769882	0.165439	0.226066	0.219936	0.364294	0.551075	0.615534	0.651509	0.869467
1.9	0.561498	0.32682	0.20707	0.35133	0.984693	0.032913	0.279507	0.795333	0.038281	0.741447	0.425479	0.338464	0.37504	0.423666	0.287347	0.797103
2	0.481119	0.323216	0.165164	0.840622	0.521494	-0.1634	0.911671	0.158901	0.289389	0.388042	0.420306	0.634348	0.424021	0.594297	0.591143	0.875751
2.1	0.63737	0.051977	0.319962	0.281459	0.121933	0.246658	0.234383	0.755188	0.242013	0.674633	0.46662	0.539586	0.339013	0.670356	0.503937	0.834093
2.2	0.656873	0.121314	0.134711	0.670353	0.533756	-0.06647	0.166085	0.885974	0.324475	0.603036	0.515348	0.220943	0.64488	0.632267	0.139675	0.814038
2.3	0.411438	0.400019	0.090855	0.634629	0.226066	0.367908	0.337636	0.915127	0.067535	0.338208	0.43047	0.24413	0.50554	0.599644	0.298897	0.864954
2.4	0.574543	0.212121	0.128568	0.174582	0.764291	2.58397	0.481336	0.504489	0.385136	0.514009	0.301778	0.55055	0.671767	0.389096	0.536629	0.724215
2.5	0.544412	0.162385	0.186022	0.275494	0.306194	0.316219	0.262534	0.015399	0.082611	0.513415	0.398208	0.501406	0.338943	0.433696	0.151777	0.436177
2.6	0.514008	0.047433	0.291154	0.336539	0.102732	0.453835	0.441566	0.861849	0.241572	0.43833	0.4538	0.139018	0.175176	0.662448	0.087587	0.98721
2.7	0.360961	1.08659	0.152084	0.191627	0.332736	0.141364	0.218261	0.103704	0.37683	0.319246	0.509703	0.310555	0.348777	0.543643	0.120273	0.666206
2.8	0.858543	0.002321	0.12929	0.16965	0.148534	-0.16194	0.148101	0.04373	0.396961	0.548902	0.303056	0.112729	0.468189	0.573939	0.164372	0.749477
2.9	0.368624	0.160231	0.14263	0.430691	0.681188	0.067169	0.530631	0.663056	0.259936	0.252166	0.165523	0.234857	0.504814	0.668966	0.670063	0.457609

## Sheet: Figure 6C, H
Figure 6C: Tau on (ms)
CNV-Y-DAMGO	CNV-Y-DAMGO + TIPP-Psi
1387.73	795.231
550.362	979.649
694.427	680.554
868.323	938
1119.99	827
769.657	799.353
782.617	641.979
988.089
801
1264.36
866.501
Figure 6H: Tau on (ms)
CNV-Y-DAMGO	CNV-Y-DAMGO + TIPP-Psi
400.42	418.27
518.57	459.58
481.47	544.84
496.77	474.13
499.41	341.2
550.13	411.5
602.95
261.15

## Sheet: Figure 6D-E, I-J
Figure 6D: Peak current (pA)
CNV-Y-DAMGO						CNV-Y-DAMGO + TIPP-Psi
0.2 mW	1 mW	4 mW	13 mW	40 mW	84 mW	0.2 mW	1 mW	4 mW	13 mW	40 mW	84 mW
0.113455	6.14637	14.0949	33.7778	44.6149	30.2006	1.79565	4.47719	16.3894	37.3024	37.8201	38.9509
-3.15969	8.56842	24.2273	56.8254	90.6935	95.1185	1.00031	4.23276	10.9191	22.7614	66.2224	68.4221
0.1454	3.86711	14.0074	29.3521	38.855	36.6833	2.46528	13.9136	18.1879	33.3142	59.0212	57.0173
5.09329	3.37763	29.3879	39.2065	88.1864	81.0743	0.0479366	5.99538	6.44004	30.2971	88.5825	95.6522
0.860858	14.653	42.5639	64.483	78.0524	75.3281	-1.51054	2.4618	12.6507	31.008	69.6898	68.6418
0.874469	11.5189	19.2382	27.8197	36.4089	33.1236	8.33453	10.8234	27.5753	55.7947	25.4698	33.0691
2.72345	5.37633	9.7741	15.6667	32.6889	35.582	-0.06136	16.8178	18.4904	33.4825	40.8	42.256
	-1.12354	14.848	27.9018	66.1788	69.2943	0.728495	5.04402	10.3965	23.6735
							1.24391	16.9788	27.8
Figure 6E: Normalized peak current
CNV-Y-DAMGO						CNV-Y-DAMGO + TIPP-Psi
0.2 mW	1 mW	4 mW	13 mW	40 mW	84 mW	0.2 mW	1 mW	4 mW	13 mW	40 mW	84 mW
0.2543	13.7765	31.5924	75.7097	100	67.6917	2.5681	10.8669	28.033	58.4361	97.0969	100
-3.322	9.0082	25.4706	59.7417	95.3479	100	3.603	20.335	26.5819	48.6892	96.7851	100
0.3742	9.9527	36.0504	75.5427	100	94.4108	0.0812	10.158	10.9114	51.3326	100	96.6048
5.7756	3.8301	33.3248	44.4587	100	91.9352	8.7134	11.3154	28.8287	58.3308	92.609	100
1.1029	18.7733	54.5325	82.615	100	96.5097	-0.088	24.1324	26.5324	48.0451	100	98.4962
2.4018	31.6376	52.8393	76.4091	100	90.9767	2.2029	15.253	31.4387	71.588	77.0199	100
7.654	15.1097	27.4692	44.0298	91.8692	100		2.9437	40.1808	65.7206	96.6703	100
	-1.621	21.4274	40.2656	95.504	100
Figure 6I: Fraction IPSC suppression
CNV-Y-DAMGO						CNV-Y-DAMGO + TIPP-Psi
0.2 mW	1 mW	4 mW	13 mW	40 mW	84 mW	0.2 mW	1 mW	4 mW	13 mW	40 mW	84 mW
0.18514	0.184427	0.086482	0.455879	0.647639	0.53322	0.00575	0.153946	0.409756	0.697209	0.809271	0.74888
0.098555	-0.01718	0.520626	0.752957	0.864822	0.808423	-0.1679	0.265969	0.322351	0.566112	0.658651	0.752431
0.075406	0.327373	0.31543	0.558817	0.652383	0.77552	0.135458	0.18117	0.443642	0.697916	0.614468	0.790465
0.16187	0.385146	0.524704	0.451343	0.59295	0.541875	-0.11122	0.485688	0.797658	0.626216	0.964724	0.784876
0.122876	0.236707	0.347927	0.701062	0.708896	0.823493	0.061616	0.156461	0.590267	0.522074	0.779394	0.684575
0.074778	0.346589	0.461048	0.668381	0.50942	0.73476	-0.05642	0.139602	0.391503	0.508054	0.516887	0.510958
0.006964	0.156736	0.462473	0.655064	0.503089	0.670148		0.111703	0.153693	0.535669	0.641631	0.63978
	0.092167	0.663916	0.498387	0.809595	0.606299		0.049252	0.282709	0.308455	0.367333	0.365856
			0.612214	0.831936	0.768991			0.149337	0.544847	0.519494	0.568876
Figure 6J: Normalized % IPSC suppression
CNV-Y-DAMGO						CNV-Y-DAMGO + TIPP-Psi
0.2 mW	1 mW	4 mW	13 mW	40 mW	84 mW	0.2 mW	1 mW	4 mW	13 mW	40 mW	84 mW
23.873	28.4768	13.3534	70.3909	100	82.3329	0.7275	19.0228	50.6327	86.1527	100	92.5376
16.6211	-1.987	60.2004	87.065	100	93.4785	-17.404	35.348	42.8413	75.2377	87.5364	100
9.1569	42.2134	40.6734	72.0571	84.122	100	17.3799	22.9194	56.1242	88.2918	77.735	100
22.0303	64.9542	63.7169	76.1182	100	91.3863	-21.517	50.3448	82.6825	64.9114	100	81.3576
18.3357	28.7443	47.3525	85.1327	86.084	100	9.6031	20.0747	75.7341	66.9846	100	87.8343
9.2364	47.1704	68.7979	90.9659	69.3315	100	-15.359	27.0082	75.7425	98.2911	100	98.8529
0.8371	23.3883	57.124	97.7492	75.0713	100		17.4092	23.9535	83.4855	100	99.7115
	11.3843	79.8037	61.56	100	74.8892		13.4081	76.9626	83.9715	100	99.5979
			73.5891	100	92.4339			26.2512	95.7761	91.3194	100
