# Supplementary material for: Convergent, functionally independent signaling by mu and delta opioid receptors in hippocampal parvalbumin interneurons
Source: eLife journal article supplement (doi:10.7554/elife.69746), 2021-11-17
Supplement: supp [file elife_poa_e69746_Figure_2_source_data_1.xlsx]

## Sheet: Figure 2B
Time (min)	IPSC (pA)
0	518.564
0.333333	445.933
0.666667	556.127
1	487.079
1.33333	481.55
1.66667	543.537
2	484.939
2.33333	510.578
2.66667	547.042
3	509.942
3.33333	133.986
3.66667	317.834
4	417.86
4.33333	522.421
4.66667	475.174
5	483.012
5.33333	515.189
5.66667	575.765
6	540.745
6.33333	568.702
6.66667	496.804
7	547.1
7.33333	509.164
7.66667	493.405
8	565.314
8.33333	243.589
8.66667	408.836
9	476.453
9.33333	527.619
9.66667	483.615
10	493.574
10.3333	564.086
10.6667	534.452
11	489.905
11.3333	584.99
11.6667	597.914
12	541.622
12.3333	506.308
12.6667	554.92
13	543.864
13.3333	392.509
13.6667	428.26
14	514.982
14.3333	521.129
14.6667	476.071
15	559.637
15.3333	568.461
15.6667	538.012
16	527.579
16.3333	565.673
16.6667	553.289
17	567.948
17.3333	618.808
17.6667	554.636
18	581.339
18.3333	447.789
18.6667	496.943
19	579.029
19.3333	580.518
19.6667	601.267
20	615.245
20.3333	579.162
20.6667	593.509
21	508.46
21.3333	526.148
21.6667	559.709
22	531.459
22.3333	580.032
22.6667	590.659
23	516.117
23.3333	467.725
23.6667	627.565
24	621.438
24.3333	606.59

## Sheet: Figure 2C-D
Figure 2C: Fraction IPSC Suppression
ACSF							CTOP							TIPP-Psi
0.2mW	1mW	4mW	7mW	13mW	40mW	84mW	0.2mW	1mW	4mW	7mW	13mW	40mW	84mW	0.2mW	1mW	4mW	7mW	13mW	40mW	84mW
0.0164382	0.167362	0.238514	0.575567	0.574645	0.802731	0.529521	-0.225438	0.143709	0.286983	0.527125	0.550516	0.617015	0.190676	0.0838278	-0.0859787	0.0807749	0.179424	0.117021	0.410107	0.212304
0.04602	0.222926	0.489337	0.579081	0.69989	0.743579	0.645653	0.112314	0.0731091	0.163504	0.222513	0.203263	0.190676	0.519837	0.17525	0.242356	0.113275	0.014666	-0.027143	0.229956	0.313628
0.168147	0.252612	0.234455	0.26638	0.533915	0.854899	0.51147	0.0845299	0.0356835	0.272726	0.334548	0.334253	0.338202	0.442662	0.00398821	-0.0171726	0.108656	0.301059	0.120815	0.264414	0.495686
0.0479054	0.30157	0.225086	0.53043	0.612083	0.627702	0.573805	-0.0393115	0.0886156	0.238075	0.197154	0.290821	0.418344	0.4858	-0.0303756	0.0864192	0.145215	0.177139	0.417414	0.472323	0.816186
-0.224497	0.199434	0.481825	0.611585	0.59772	0.57997	0.736516	0.0849147	0.359079	0.13338	0.235835	0.322473	0.441662	0.418315	0.0420788	0.0280286		0.269741	0.45581	0.625283	0.324939
0.0142659	0.257989	0.245984	0.336789	0.556549	0.657156	0.751802			0.379145	0.407359		0.276018	0.216986	0.00813639			0.334208	0.304913	0.429584	0.309584
-0.0331382		0.358351	0.348619	0.567089	0.531828	0.650629							0.351446	-0.163871				0.206926	0.208669	0.413857
-0.00625217		0.299245	0.324835	0.325279	0.509445								0.458276					0.291959	0.361063	0.473259
					0.569393													0.478436	0.393803	0.579691
					0.565185														0.426813	0.4566
					0.638284
					0.868457
Figure 2D: Normalized % IPSC suppression
ACSF							CTOP							TIPP-Psi
0.2mW	1mW	4mW	7mW	13mW	40mW	84mW	0.2mW	1mW	4mW	7mW	13mW	40mW	84mW	0.2mW	1mW	4mW	7mW	13mW	40mW	84mW
2	32.7218	29.7	71.7	71.6	100	100	-36.5369	29.5819	46.5115	85.4315	89.2225	100	100	16.9115	-27.772	16.2956	57.2092	28.5343	100	100
7	38.8505	70	83	100	100	100	58.9031	17.477	85.7496	116.697	106.601	100	100	21.4718	58.5603	13.8786	2.9587	-12.785	108.314	100
22.613	34.2982	31.531	35.824	71.803	100	100	16.2608	16.4451	52.4638	64.3563	64.2996	65.0592	100	1.2274	-3.629	33.4389	36.8861	38.5218	84.3082	100
5.6036	40.113	26.329	62.0459	71.5971	100	100	-8.881	25.2146	53.7826	44.5383	65.6982	94.5064	100	-9.812	14.9078	30.684	54.5145	84.2094	95.2867	100
-35.765	22.9642	76.7602	97.4324	95.2235	100	100	19.2262	78.3543	30.1996	53.3972	73.0135	100	100	10.1675	6.1385		46.5319	55.8463	76.6104	100
2.4598	39.6522	42.4132	58.0701	95.9617	124.104	100			90.6362	97.3809		56.8172	100	1.7192			73.1949	93.8368	132.204	100
-6.258		67.6746	65.8367	107.095	82.3706	100							100	-28.269				49.9994	67.403	100
-0.968		46.3477	50.3111	50.3798	99.6041								100					50.3646	87.2434	100
					99.2311													104.782	83.2109	100
					76.7376														93.4763	100
					84.9005
					100

## Sheet: Figure 2E
Time (s)	Current (pA)
0	-1.45842
0.0001	51.3795
0.0002	258.543
0.0003	379.684
0.0004	428.656
0.0005	448.953
0.0006	385.483
0.0007	152.867
0.0008	32.0486
0.0009	-22.7225
0.001	-38.5095
0.0011	-44.9531
0.0012	-47.8528
0.0013	-44.9531
0.0014	-38.1873
0.0015	-31.4214
0.0016	-6.93552
0.0017	36.2369
0.0018	82.9535
0.0019	126.448
0.002	157.7
0.0021	182.83
0.0022	201.839
0.0023	211.182
0.0024	222.459
0.0025	232.768
0.0026	248.555
0.0027	260.798
0.0028	285.284
0.0029	314.603
0.003	339.089
0.0031	360.675
0.0032	375.173
0.0033	386.128
0.0034	395.471
0.0035	406.103
0.0036	419.312
0.0037	423.501
0.0038	428.656
0.0039	430.911
0.004	429.944
0.0041	432.2
0.0042	434.777
0.0043	437.033
0.0044	435.744
0.0045	437.999
0.0046	442.832
0.0047	441.221
0.0048	442.832
0.0049	442.832
0.005	439.288
0.0051	445.409
0.0052	447.665
0.0053	450.242
0.0054	446.698
0.0055	450.242
0.0056	447.665
0.0057	453.142
0.0058	448.309
0.0059	446.698
0.006	449.598
0.0061	450.242
0.0062	450.242
0.0063	451.531
0.0064	451.209
0.0065	445.409
0.0066	448.631
0.0067	452.175
0.0068	454.108
0.0069	456.363
0.007	455.075
0.0071	451.531
0.0072	448.953
0.0073	448.631
0.0074	452.175
0.0075	445.087
0.0076	441.221
0.0077	443.476
0.0078	446.698
0.0079	440.899
0.008	441.865
0.0081	445.087
0.0082	442.51
0.0083	437.033
0.0084	437.677
0.0085	437.999
0.0086	438.643
0.0087	440.899
0.0088	439.288
0.0089	435.099
0.009	434.455
0.0091	430.911
0.0092	430.589
0.0093	433.811
0.0094	434.777
0.0095	430.267
0.0096	428.978
0.0097	433.166
0.0098	426.078
0.0099	423.501
0.01	425.112
0.0101	422.212
0.0102	418.668
0.0103	411.58
0.0104	414.802
0.0105	412.869
0.0106	416.735
0.0107	415.446
0.0108	411.58
0.0109	407.714
0.011	406.103
0.0111	404.814
0.0112	403.848
0.0113	405.781
0.0114	404.17
0.0115	403.848
0.0116	403.848
0.0117	405.136
0.0118	399.015
0.0119	397.404
0.012	396.76
0.0121	388.061
0.0122	386.128
0.0123	389.349
0.0124	388.383
0.0125	386.772
0.0126	379.04
0.0127	380.973
0.0128	378.073
0.0129	376.462
0.013	376.14
0.0131	370.018
0.0132	366.474
0.0133	370.341
0.0134	370.018
0.0135	369.696
0.0136	369.696
0.0137	363.575
0.0138	367.441
0.0139	367.441
0.014	361.642
0.0141	358.42
0.0142	360.675
0.0143	357.776
0.0144	353.265
0.0145	353.587
0.0146	356.487
0.0147	353.265
0.0148	352.298
0.0149	355.198
0.015	351.01
0.0151	349.399
0.0152	353.265
0.0153	343.277
0.0154	345.533
0.0155	344.244
0.0156	345.855
0.0157	341.666
0.0158	341.988
0.0159	341.344
0.016	339.733
0.0161	340.7
0.0162	340.378
0.0163	337.156
0.0164	338.444
0.0165	337.478
0.0166	335.223
0.0167	330.068
0.0168	332.001
0.0169	332.645
0.017	330.068
0.0171	327.168
0.0172	321.369
0.0173	323.302
0.0174	323.946
0.0175	322.658
0.0176	323.302
0.0177	324.268
0.0178	322.335
0.0179	314.925
0.018	313.314
0.0181	318.147
0.0182	315.247
0.0183	311.703
0.0184	311.381
0.0185	313.314
0.0186	307.837
0.0187	306.226
0.0188	307.837
0.0189	309.126
0.019	305.582
0.0191	301.716
0.0192	300.749
0.0193	295.594
0.0194	292.694
0.0195	292.372
0.0196	294.305
0.0197	291.084
0.0198	293.017
0.0199	294.628
0.02	292.694
0.0201	292.05
0.0202	292.694
0.0203	293.661
0.0204	287.862
0.0205	285.929
0.0206	285.929
0.0207	286.573
0.0208	286.895
0.0209	285.284
0.021	284.962
0.0211	281.418
0.0212	282.385
0.0213	283.996
0.0214	282.707
0.0215	276.908
0.0216	275.297
0.0217	277.552
0.0218	278.196
0.0219	272.397
0.022	275.941
0.0221	272.075
0.0222	265.953
0.0223	268.853
0.0224	270.464
0.0225	270.142
0.0226	268.853
0.0227	268.209
0.0228	267.242
0.0229	268.531
0.023	261.121
0.0231	262.087
0.0232	256.932
0.0233	256.288
0.0234	256.932
0.0235	255.643
0.0236	256.932
0.0237	254.033
0.0238	258.865
0.0239	256.288
0.024	257.899
0.0241	254.033
0.0242	255.643
0.0243	255.643
0.0244	255.966
0.0245	249.522
0.0246	252.422
0.0247	248.233
0.0248	243.4
0.0249	247.267
0.025	244.367
0.0251	244.367
0.0252	243.723
0.0253	238.246
0.0254	239.212
0.0255	236.312
0.0256	229.547
0.0257	230.191
0.0258	233.091
0.0259	236.635
0.026	233.735
0.0261	231.158
0.0262	231.158
0.0263	224.07
0.0264	226.325
0.0265	222.781
0.0266	224.392
0.0267	223.747
0.0268	223.103
0.0269	223.747
0.027	219.881
0.0271	216.982
0.0272	220.203
0.0273	221.492
0.0274	216.015
0.0275	214.726
0.0276	218.915
0.0277	215.371
0.0278	213.438
0.0279	214.082
0.028	213.76
0.0281	214.404
0.0282	208.283
0.0283	209.571
0.0284	208.605
0.0285	202.805
0.0286	210.538
0.0287	210.538
0.0288	205.705
0.0289	206.35
0.029	206.35
0.0291	204.416
0.0292	201.195
0.0293	198.295
0.0294	198.617
0.0295	197.65
0.0296	195.395
0.0297	194.429
0.0298	194.751
0.0299	192.818
0.03	193.14
0.0301	193.14
0.0302	191.529
0.0303	190.24
0.0304	189.918
0.0305	191.207
0.0306	195.395
0.0307	194.751
0.0308	189.274
0.0309	193.462
0.031	189.596
0.0311	189.274
0.0312	187.663
0.0313	183.152
0.0314	184.763
0.0315	182.186
0.0316	180.253
0.0317	182.186
0.0318	181.541
0.0319	177.675
0.032	178.32
0.0321	179.608
0.0322	180.575
0.0323	175.42
0.0324	176.064
0.0325	171.554
0.0326	174.776
0.0327	179.286
0.0328	171.876
0.0329	167.365
0.033	173.809
0.0331	174.131
0.0332	169.621
0.0333	171.232
0.0334	168.654
0.0335	167.365
0.0336	174.453
0.0337	167.365
0.0338	168.654
0.0339	169.621
0.034	162.21
0.0341	165.432
0.0342	161.244
0.0343	160.6
0.0344	166.077
0.0345	163.177
0.0346	162.533
0.0347	160.277
0.0348	159.633
0.0349	164.466
0.035	163.177
0.0351	158.344
0.0352	160.277
0.0353	160.6
0.0354	158.344
0.0355	158.666
0.0356	158.989
0.0357	162.855
0.0358	156.089
0.0359	155.122
0.036	153.512
0.0361	151.578
0.0362	151.256
0.0363	152.223
0.0364	154.8
0.0365	154.8
0.0366	156.089
0.0367	152.545
0.0368	152.223
0.0369	151.901
0.037	149.323
0.0371	147.068
0.0372	148.034
0.0373	147.712
0.0374	147.712
0.0375	142.88
0.0376	145.457
0.0377	142.88
0.0378	139.335
0.0379	140.624
0.038	140.624
0.0381	141.591
0.0382	141.591
0.0383	143.846
0.0384	140.946
0.0385	143.524
0.0386	135.469
0.0387	135.469
0.0388	132.892
0.0389	132.892
0.039	130.637
0.0391	139.335
0.0392	132.247
0.0393	129.67
0.0394	132.247
0.0395	129.67
0.0396	134.503
0.0397	132.892
0.0398	131.603
0.0399	136.114
0.04	131.603
0.0401	132.247
0.0402	130.314
0.0403	129.992
0.0404	128.703
0.0405	130.959
0.0406	126.77
0.0407	127.737
0.0408	132.892
0.0409	127.415
0.041	123.549
0.0411	123.549
0.0412	121.938
0.0413	124.837
0.0414	120.005
0.0415	120.649
0.0416	121.938
0.0417	120.971
0.0418	121.938
0.0419	120.327
0.042	123.226
0.0421	124.193
0.0422	120.971
0.0423	118.716
0.0424	122.582
0.0425	120.649
0.0426	111.95
0.0427	115.494
0.0428	116.138
0.0429	118.394
0.043	115.172
0.0431	114.85
0.0432	114.85
0.0433	115.816
0.0434	112.272
0.0435	116.138
0.0436	115.172
0.0437	113.561
0.0438	112.594
0.0439	115.172
0.044	113.561
0.0441	112.272
0.0442	115.172
0.0443	113.239
0.0444	104.217
0.0445	110.983
0.0446	108.406
0.0447	108.728
0.0448	107.117
0.0449	105.506
0.045	108.406
0.0451	105.828
0.0452	105.506
0.0453	109.372
0.0454	111.95
0.0455	110.983
0.0456	105.506
0.0457	110.339
0.0458	110.661
0.0459	114.205
0.046	106.151
0.0461	107.117
0.0462	106.151
0.0463	106.795
0.0464	108.406
0.0465	104.54
0.0466	108.084
0.0467	107.439
0.0468	104.217
0.0469	106.151
0.047	104.862
0.0471	103.573
0.0472	105.828
0.0473	103.251
0.0474	96.4851
0.0475	96.8073
0.0476	101.64
0.0477	98.4182
0.0478	96.8073
0.0479	96.8073
0.048	96.1629
0.0481	94.2299
0.0482	93.9077
0.0483	97.1295
0.0484	91.008
0.0485	90.6858
0.0486	87.1418
0.0487	90.0415
0.0488	88.7527
0.0489	90.6858
0.049	90.0415
0.0491	89.3971
0.0492	89.7193
0.0493	86.4975
0.0494	84.8865
0.0495	91.008
0.0496	89.3971
0.0497	87.1418
0.0498	85.5309
0.0499	82.6313
0.05	86.4975
0.0501	89.3971
0.0502	83.5978
0.0503	83.2756
0.0504	89.0749
0.0505	86.1753
0.0506	89.0749
0.0507	81.3425
0.0508	84.2422
0.0509	82.6313
0.051	79.7316
0.0511	81.3425
0.0512	80.6982
0.0513	81.0204
0.0514	79.0873
0.0515	81.0204
0.0516	79.7316
0.0517	78.7651
0.0518	79.4094
0.0519	81.6647
0.052	78.1207
0.0521	81.0204
0.0522	83.5978
0.0523	78.1207
0.0524	76.1876
0.0525	75.5432
0.0526	80.376
0.0527	78.4429
0.0528	79.0873
0.0529	81.3425
0.053	81.9869
0.0531	81.3425
0.0532	81.6647
0.0533	79.0873
0.0534	80.6982
0.0535	83.5978
0.0536	84.2422
0.0537	80.0538
0.0538	80.376
0.0539	78.1207
0.054	79.7316
0.0541	82.6313
0.0542	83.2756
0.0543	84.8865
0.0544	84.2422
0.0545	81.3425
0.0546	80.6982
0.0547	79.0873
0.0548	81.6647
0.0549	80.0538
0.055	82.6313
0.0551	80.6982
0.0552	80.0538
0.0553	81.3425
0.0554	80.376
0.0555	80.6982
0.0556	79.7316
0.0557	74.8989
0.0558	77.7985
0.0559	76.5098
0.056	75.5432
0.0561	76.832
0.0562	72.3214
0.0563	81.0204
0.0564	79.4094
0.0565	74.8989
0.0566	74.5767
0.0567	74.5767
0.0568	75.2211
0.0569	78.1207
0.057	75.8654
0.0571	73.9323
0.0572	71.0327
0.0573	76.5098
0.0574	70.7105
0.0575	74.5767
0.0576	71.0327
0.0577	73.6102
0.0578	70.7105
0.0579	71.0327
0.058	71.3549
0.0581	67.8109
0.0582	71.0327
0.0583	66.5221
0.0584	70.0661
0.0585	75.2211
0.0586	70.3883
0.0587	67.8109
0.0588	71.9992
0.0589	69.744
0.059	69.0996
0.0591	68.133
0.0592	67.4887
0.0593	69.0996
0.0594	63.9447
0.0595	62.9781
0.0596	63.9447
0.0597	62.3338
0.0598	60.4007
0.0599	65.2334
0.06	61.045
0.0601	63.9447
0.0602	59.7563
0.0603	61.045
0.0604	63.6225
0.0605	59.1119
0.0606	64.9112
0.0607	64.2668
0.0608	61.3672
0.0609	57.1788
0.061	58.7897
0.0611	60.7228
0.0612	58.1454
0.0613	58.7897
0.0614	56.2123
0.0615	58.4676
0.0616	56.2123
0.0617	59.7563
0.0618	57.501
0.0619	57.8232
0.062	58.7897
0.0621	58.1454
0.0622	55.8901
0.0623	54.6014
0.0624	54.6014
0.0625	55.8901
0.0626	48.8021
0.0627	47.8355
0.0628	53.3126
0.0629	51.0574
0.063	52.9905
0.0631	48.4799
0.0632	52.0239
0.0633	51.7017
0.0634	52.0239
0.0635	50.413
0.0636	53.3126
0.0637	51.7017
0.0638	52.9905
0.0639	52.9905
0.064	52.0239
0.0641	50.7352
0.0642	51.7017
0.0643	48.8021
0.0644	45.9024
0.0645	49.4464
0.0646	49.4464
0.0647	49.1243
0.0648	49.7686
0.0649	48.4799
0.065	49.1243
0.0651	46.5468
0.0652	46.5468
0.0653	47.8355
0.0654	47.1912
0.0655	49.7686
0.0656	49.7686
0.0657	44.6137
0.0658	50.7352
0.0659	51.0574
0.066	46.2246
0.0661	45.5802
0.0662	45.2581
0.0663	44.6137
0.0664	45.2581
0.0665	45.5802
0.0666	47.5133
0.0667	48.4799
0.0668	40.4253
0.0669	43.325
0.067	45.2581
0.0671	44.9359
0.0672	45.2581
0.0673	45.9024
0.0674	44.9359
0.0675	43.325
0.0676	41.3919
0.0677	44.6137
0.0678	49.7686
0.0679	45.2581
0.068	44.2915
0.0681	48.4799
0.0682	48.4799
0.0683	49.4464
0.0684	44.2915
0.0685	47.8355
0.0686	46.869
0.0687	45.5802
0.0688	46.869
0.0689	52.0239
0.069	52.0239
0.0691	48.8021
0.0692	42.6806
0.0693	43.325
0.0694	42.0362
0.0695	43.6472
0.0696	41.7141
0.0697	42.0362
0.0698	46.869
0.0699	46.5468
0.07	48.1577
0.0701	47.1912
0.0702	38.4922
0.0703	39.1366
0.0704	40.4253
0.0705	41.3919
0.0706	43.9693
0.0707	42.6806
0.0708	42.6806
0.0709	44.2915
0.071	47.5133
0.0711	42.3584
0.0712	44.6137
0.0713	48.1577
0.0714	48.4799
0.0715	42.3584
0.0716	43.6472
0.0717	45.5802
0.0718	43.0028
0.0719	43.325
0.072	44.6137
0.0721	44.6137
0.0722	48.1577
0.0723	48.1577
0.0724	43.6472
0.0725	45.5802
0.0726	46.5468
0.0727	52.3461
0.0728	49.1243
0.0729	43.0028
0.073	43.9693
0.0731	43.9693
0.0732	46.2246
0.0733	43.9693
0.0734	42.3584
0.0735	44.6137
0.0736	43.6472
0.0737	46.5468
0.0738	49.1243
0.0739	43.6472
0.074	46.869
0.0741	45.2581
0.0742	43.325
0.0743	42.6806
0.0744	45.9024
0.0745	47.1912
0.0746	43.0028
0.0747	44.6137
0.0748	42.3584
0.0749	42.3584
0.075	43.325
0.0751	43.9693
0.0752	44.6137
0.0753	44.2915
0.0754	41.7141
0.0755	43.0028
0.0756	42.6806
0.0757	44.2915
0.0758	49.4464
0.0759	47.8355
0.076	43.9693
0.0761	43.6472
0.0762	41.7141
0.0763	41.7141
0.0764	41.3919
0.0765	40.1031
0.0766	39.781
0.0767	36.2369
0.0768	36.8813
0.0769	35.5926
0.077	41.7141
0.0771	42.6806
0.0772	41.3919
0.0773	43.9693
0.0774	45.2581
0.0775	39.781
0.0776	45.2581
0.0777	47.1912
0.0778	40.4253
0.0779	38.4922
0.078	39.1366
0.0781	40.4253
0.0782	39.4588
0.0783	38.8144
0.0784	43.325
0.0785	41.3919
0.0786	40.4253
0.0787	42.3584
0.0788	42.6806
0.0789	41.3919
0.079	40.4253
0.0791	42.0362
0.0792	38.8144
0.0793	43.325
0.0794	40.4253
0.0795	39.781
0.0796	38.17
0.0797	40.4253
0.0798	36.2369
0.0799	37.8479
0.08	38.4922
0.0801	40.4253
0.0802	38.4922
0.0803	39.1366
0.0804	38.17
0.0805	40.7475
0.0806	38.8144
0.0807	31.082
0.0808	36.8813
0.0809	34.626
0.081	34.3038
0.0811	35.2704
0.0812	30.7598
0.0813	33.6595
0.0814	33.6595
0.0815	32.3708
0.0816	34.9482
0.0817	31.7264
0.0818	27.8602
0.0819	29.4711
0.082	31.4042
0.0821	27.2158
0.0822	25.2827
0.0823	32.6929
0.0824	30.1155
0.0825	33.3373
0.0826	31.4042
0.0827	29.7933
0.0828	34.3038
0.0829	32.3708
0.083	34.9482
0.0831	33.0151
0.0832	31.082
0.0833	33.3373
0.0834	32.0486
0.0835	32.0486
0.0836	34.3038
0.0837	30.1155
0.0838	27.2158
0.0839	31.4042
0.084	29.7933
0.0841	31.082
0.0842	28.8267
0.0843	31.4042
0.0844	27.538
0.0845	30.1155
0.0846	31.082
0.0847	30.4377
0.0848	28.8267
0.0849	23.6718
0.085	28.5046
0.0851	24.6384
0.0852	24.6384
0.0853	27.8602
0.0854	28.1824
0.0855	29.1489
0.0856	24.9605
0.0857	24.6384
0.0858	23.3496
0.0859	25.9271
0.086	24.9605
0.0861	24.6384
0.0862	30.7598
0.0863	30.4377
0.0864	25.2827
0.0865	24.9605
0.0866	29.1489
0.0867	28.5046
0.0868	26.8936
0.0869	29.7933
0.087	27.2158
0.0871	26.8936
0.0872	26.5715
0.0873	32.0486
0.0874	31.7264
0.0875	29.7933
0.0876	30.1155
0.0877	28.5046
0.0878	28.1824
0.0879	33.0151
0.088	35.9148
0.0881	33.3373
0.0882	33.0151
0.0883	33.3373
0.0884	31.4042
0.0885	33.9817
0.0886	33.6595
0.0887	36.8813
0.0888	37.5257
0.0889	31.082
0.089	35.2704
0.0891	34.626
0.0892	35.5926
0.0893	36.8813
0.0894	34.9482
0.0895	37.2035
0.0896	36.2369
0.0897	35.9148
0.0898	40.4253
0.0899	36.2369
0.09	30.7598
0.0901	32.3708
0.0902	33.9817
0.0903	38.4922
0.0904	34.9482
0.0905	31.7264
0.0906	35.9148
0.0907	35.2704
0.0908	29.4711
0.0909	34.9482
0.091	29.7933
0.0911	32.3708
0.0912	34.3038
0.0913	33.9817
0.0914	32.6929
0.0915	37.5257
0.0916	33.6595
0.0917	35.2704
0.0918	33.9817
0.0919	28.1824
0.092	32.3708
0.0921	31.7264
0.0922	35.5926
0.0923	36.2369
0.0924	26.5715
0.0925	32.6929
0.0926	35.9148
0.0927	30.4377
0.0928	30.4377
0.0929	27.8602
0.093	32.0486
0.0931	30.1155
0.0932	26.5715
0.0933	28.1824
0.0934	28.8267
0.0935	29.7933
0.0936	29.4711
0.0937	30.1155
0.0938	27.8602
0.0939	28.1824
0.094	31.7264
0.0941	33.3373
0.0942	29.7933
0.0943	25.2827
0.0944	26.2493
0.0945	23.994
0.0946	26.8936
0.0947	29.4711
0.0948	28.8267
0.0949	27.538
0.095	31.7264
0.0951	23.994
0.0952	26.2493
0.0953	25.9271
0.0954	25.2827
0.0955	30.1155
0.0956	26.5715
0.0957	26.5715
0.0958	29.4711
0.0959	29.7933
0.096	22.3831
0.0961	23.6718
0.0962	22.3831
0.0963	22.3831
0.0964	20.7722
0.0965	23.994
0.0966	24.3162
0.0967	25.9271
0.0968	22.7053
0.0969	24.6384
0.097	27.8602
0.0971	34.626
0.0972	31.7264
0.0973	35.2704
0.0974	36.2369
0.0975	35.9148
0.0976	33.0151
0.0977	33.6595
0.0978	30.7598
0.0979	31.082
0.098	26.8936
0.0981	25.9271
0.0982	32.6929
0.0983	31.082
0.0984	25.9271
0.0985	27.538
0.0986	27.538
0.0987	23.994
0.0988	26.5715
0.0989	28.1824
0.099	25.9271
0.0991	29.4711
0.0992	29.7933
0.0993	27.2158
0.0994	30.1155
0.0995	27.538
0.0996	25.2827
0.0997	23.994
0.0998	24.3162
0.0999	23.6718
0.1	23.0275
0.1001	79.7316
0.1002	289.795
0.1003	408.68
0.1004	457.652
0.1005	482.138
0.1006	414.802
0.1007	180.575
0.1008	59.7563
0.1009	11.7511
0.101	-10.1574
0.1011	-16.2788
0.1012	-15.9567
0.1013	-15.9567
0.1014	-9.51302
0.1015	3.69648
0.1016	16.906
0.1017	46.5468
0.1018	77.4763
0.1019	109.372
0.102	134.18
0.1021	157.055
0.1022	175.742
0.1023	191.529
0.1024	206.994
0.1025	220.203
0.1026	226.325
0.1027	238.89
0.1028	257.577
0.1029	280.452
0.103	297.205
0.1031	308.804
0.1032	317.825
0.1033	323.302
0.1034	332.323
0.1035	340.378
0.1036	342.311
0.1037	347.788
0.1038	354.232
0.1039	351.332
0.104	355.198
0.1041	354.232
0.1042	359.064
0.1043	361.964
0.1044	366.152
0.1045	367.441
0.1046	371.952
0.1047	373.24
0.1048	371.952
0.1049	372.596
0.105	376.462
0.1051	378.395
0.1052	381.617
0.1053	376.784
0.1054	370.985
0.1055	369.374
0.1056	371.629
0.1057	374.851
0.1058	371.952
0.1059	371.629
0.106	369.696
0.1061	371.629
0.1062	370.985
0.1063	374.851
0.1064	373.562
0.1065	367.441
0.1066	363.575
0.1067	363.575
0.1068	361.964
0.1069	367.763
0.107	365.508
0.1071	367.441
0.1072	366.152
0.1073	363.897
0.1074	361.642
0.1075	362.286
0.1076	360.997
0.1077	355.198
0.1078	356.165
0.1079	357.131
0.108	354.554
0.1081	353.587
0.1082	351.332
0.1083	345.855
0.1084	345.855
0.1085	348.754
0.1086	349.721
0.1087	344.888
0.1088	343.922
0.1089	340.055
0.109	334.578
0.1091	335.223
0.1092	336.189
0.1093	335.223
0.1094	330.068
0.1095	327.812
0.1096	323.624
0.1097	318.791
0.1098	319.758
0.1099	315.892
0.11	315.247
0.1101	319.436
0.1102	318.469
0.1103	312.67
0.1104	312.992
0.1105	312.026
0.1106	312.348
0.1107	309.448
0.1108	305.26
0.1109	303.327
0.111	300.749
0.1111	305.582
0.1112	303.971
0.1113	298.494
0.1114	293.983
0.1115	292.05
0.1116	289.473
0.1117	288.506
0.1118	287.54
0.1119	283.673
0.112	282.707
0.1121	277.552
0.1122	279.163
0.1123	277.23
0.1124	271.753
0.1125	273.686
0.1126	271.753
0.1127	272.397
0.1128	274.008
0.1129	272.719
0.113	268.853
0.1131	267.242
0.1132	266.92
0.1133	270.142
0.1134	265.309
0.1135	264.665
0.1136	264.342
0.1137	265.631
0.1138	266.92
0.1139	258.221
0.114	253.71
0.1141	256.61
0.1142	259.51
0.1143	254.355
0.1144	250.811
0.1145	252.744
0.1146	249.2
0.1147	249.2
0.1148	245.334
0.1149	245.656
0.115	251.133
0.1151	245.978
0.1152	245.656
0.1153	244.367
0.1154	247.267
0.1155	241.467
0.1156	244.689
0.1157	243.4
0.1158	241.79
0.1159	235.99
0.116	236.957
0.1161	238.89
0.1162	239.212
0.1163	231.802
0.1164	230.513
0.1165	230.835
0.1166	230.835
0.1167	227.936
0.1168	226.325
0.1169	225.68
0.117	222.459
0.1171	221.814
0.1172	224.392
0.1173	224.392
0.1174	220.848
0.1175	221.814
0.1176	216.659
0.1177	218.915
0.1178	216.015
0.1179	217.626
0.118	218.592
0.1181	218.27
0.1182	217.948
0.1183	216.659
0.1184	215.693
0.1185	215.371
0.1186	214.082
0.1187	215.371
0.1188	215.371
0.1189	215.693
0.119	212.149
0.1191	209.893
0.1192	206.35
0.1193	212.149
0.1194	210.538
0.1195	207.638
0.1196	202.483
0.1197	202.805
0.1198	208.927
0.1199	202.805
0.12	198.939
0.1201	202.483
0.1202	198.617
0.1203	195.395
0.1204	197.006
0.1205	196.684
0.1206	203.128
0.1207	198.295
0.1208	198.939
0.1209	198.939
0.121	196.684
0.1211	193.14
0.1212	189.918
0.1213	189.274
0.1214	185.73
0.1215	191.851
0.1216	193.14
0.1217	184.441
0.1218	187.341
0.1219	188.307
0.122	186.374
0.1221	183.152
0.1222	182.186
0.1223	183.797
0.1224	184.119
0.1225	180.897
0.1226	182.186
0.1227	180.575
0.1228	180.575
0.1229	178.32
0.123	185.085
0.1231	181.541
0.1232	174.776
0.1233	172.842
0.1234	175.098
0.1235	173.487
0.1236	168.654
0.1237	168.01
0.1238	169.298
0.1239	171.876
0.124	171.876
0.1241	172.52
0.1242	167.365
0.1243	168.01
0.1244	170.587
0.1245	164.466
0.1246	166.077
0.1247	165.754
0.1248	159.955
0.1249	165.11
0.125	158.344
0.1251	159.955
0.1252	158.666
0.1253	159.311
0.1254	157.7
0.1255	157.055
0.1256	156.733
0.1257	153.834
0.1258	158.344
0.1259	156.411
0.126	156.733
0.1261	158.344
0.1262	155.767
0.1263	154.8
0.1264	149.967
0.1265	154.156
0.1266	150.934
0.1267	151.901
0.1268	153.512
0.1269	149.001
0.127	145.135
0.1271	146.746
0.1272	145.457
0.1273	143.202
0.1274	144.813
0.1275	149.001
0.1276	142.557
0.1277	138.047
0.1278	140.624
0.1279	141.268
0.128	141.591
0.1281	138.369
0.1282	143.202
0.1283	140.624
0.1284	140.302
0.1285	139.98
0.1286	140.302
0.1287	141.913
0.1288	140.624
0.1289	137.402
0.129	132.57
0.1291	135.147
0.1292	138.369
0.1293	136.114
0.1294	132.247
0.1295	131.603
0.1296	135.791
0.1297	135.469
0.1298	135.147
0.1299	133.536
0.13	138.047
0.1301	134.18
0.1302	130.959
0.1303	134.18
0.1304	132.247
0.1305	127.737
0.1306	126.448
0.1307	129.67
0.1308	129.67
0.1309	128.059
0.131	128.381
0.1311	124.837
0.1312	122.582
0.1313	126.448
0.1314	124.193
0.1315	122.904
0.1316	124.837
0.1317	120.005
0.1318	122.904
0.1319	123.226
0.132	120.649
0.1321	122.26
0.1322	118.716
0.1323	117.105
0.1324	117.749
0.1325	116.783
0.1326	117.749
0.1327	119.36
0.1328	118.071
0.1329	117.427
0.133	115.816
0.1331	118.071
0.1332	117.749
0.1333	116.783
0.1334	116.783
0.1335	115.816
0.1336	114.527
0.1337	113.561
0.1338	105.184
0.1339	112.594
0.134	111.628
0.1341	112.916
0.1342	111.305
0.1343	110.661
0.1344	111.95
0.1345	114.205
0.1346	115.494
0.1347	120.327
0.1348	118.394
0.1349	116.138
0.135	114.527
0.1351	116.138
0.1352	118.394
0.1353	112.594
0.1354	116.138
0.1355	113.239
0.1356	114.205
0.1357	112.916
0.1358	112.272
0.1359	109.695
0.136	111.305
0.1361	107.761
0.1362	107.761
0.1363	105.184
0.1364	107.761
0.1365	104.862
0.1366	109.372
0.1367	108.406
0.1368	106.151
0.1369	102.284
0.137	102.284
0.1371	105.506
0.1372	101.962
0.1373	102.929
0.1374	109.695
0.1375	103.251
0.1376	101.962
0.1377	103.573
0.1378	102.929
0.1379	104.217
0.138	101.318
0.1381	103.573
0.1382	106.473
0.1383	109.05
0.1384	112.594
0.1385	114.527
0.1386	112.594
0.1387	113.561
0.1388	108.406
0.1389	113.239
0.139	113.883
0.1391	109.695
0.1392	109.695
0.1393	112.916
0.1394	109.05
0.1395	107.761
0.1396	111.95
0.1397	109.695
0.1398	102.607
0.1399	97.7739
0.14	100.674
0.1401	102.284
0.1402	101.318
0.1403	103.251
0.1404	101.962
0.1405	105.184
0.1406	104.862
0.1407	99.3848
0.1408	101.64
0.1409	102.284
0.141	102.607
0.1411	103.895
0.1412	97.4517
0.1413	100.351
0.1414	99.707
0.1415	100.351
0.1416	101.318
0.1417	98.096
0.1418	103.895
0.1419	99.3848
0.142	96.8073
0.1421	98.7404
0.1422	99.0626
0.1423	95.8408
0.1424	95.1964
0.1425	100.029
0.1426	96.8073
0.1427	93.9077
0.1428	92.6189
0.1429	98.7404
0.143	97.4517
0.1431	93.5855
0.1432	93.5855
0.1433	98.4182
0.1434	95.5186
0.1435	92.2968
0.1436	93.5855
0.1437	95.1964
0.1438	94.2299
0.1439	91.3302
0.144	91.3302
0.1441	96.8073
0.1442	97.7739
0.1443	87.7862
0.1444	91.6524
0.1445	94.2299
0.1446	93.2633
0.1447	88.7527
0.1448	95.1964
0.1449	92.9411
0.145	90.3637
0.1451	90.3637
0.1452	93.5855
0.1453	88.4306
0.1454	93.5855
0.1455	94.2299
0.1456	95.1964
0.1457	88.7527
0.1458	85.8531
0.1459	89.0749
0.146	88.4306
0.1461	86.1753
0.1462	80.6982
0.1463	78.4429
0.1464	84.8865
0.1465	85.8531
0.1466	83.92
0.1467	82.3091
0.1468	84.5644
0.1469	81.6647
0.147	82.9535
0.1471	83.5978
0.1472	84.5644
0.1473	83.92
0.1474	81.9869
0.1475	79.4094
0.1476	78.7651
0.1477	81.0204
0.1478	77.4763
0.1479	75.5432
0.148	73.6102
0.1481	75.5432
0.1482	80.6982
0.1483	72.9658
0.1484	72.6436
0.1485	73.9323
0.1486	68.133
0.1487	70.0661
0.1488	70.3883
0.1489	70.3883
0.149	70.7105
0.1491	72.9658
0.1492	69.0996
0.1493	71.3549
0.1494	76.5098
0.1495	74.8989
0.1496	72.6436
0.1497	70.7105
0.1498	68.7774
0.1499	69.4218
0.15	71.0327
0.1501	67.4887
0.1502	69.0996
0.1503	69.744
0.1504	65.8778
0.1505	69.744
0.1506	68.4552
0.1507	64.2668
0.1508	64.2668
0.1509	70.3883
0.151	65.8778
0.1511	70.7105
0.1512	69.0996
0.1513	65.2334
0.1514	67.4887
0.1515	69.4218
0.1516	68.4552
0.1517	74.2545
0.1518	70.7105
0.1519	70.7105
0.152	67.4887
0.1521	70.0661
0.1522	69.4218
0.1523	69.0996
0.1524	73.288
0.1525	73.9323
0.1526	70.7105
0.1527	73.9323
0.1528	73.9323
0.1529	69.744
0.153	70.3883
0.1531	71.3549
0.1532	73.6102
0.1533	68.133
0.1534	70.3883
0.1535	70.0661
0.1536	69.744
0.1537	69.0996
0.1538	68.133
0.1539	70.3883
0.154	76.1876
0.1541	71.6771
0.1542	67.8109
0.1543	67.1665
0.1544	68.4552
0.1545	68.4552
0.1546	72.6436
0.1547	71.0327
0.1548	69.744
0.1549	68.7774
0.155	68.7774
0.1551	70.0661
0.1552	66.1999
0.1553	63.9447
0.1554	66.8443
0.1555	68.7774
0.1556	62.9781
0.1557	67.1665
0.1558	66.5221
0.1559	66.8443
0.156	65.8778
0.1561	65.5556
0.1562	66.1999
0.1563	65.8778
0.1564	62.9781
0.1565	63.3003
0.1566	62.6559
0.1567	60.0785
0.1568	63.6225
0.1569	68.133
0.157	68.4552
0.1571	64.589
0.1572	59.7563
0.1573	59.1119
0.1574	64.589
0.1575	62.3338
0.1576	59.1119
0.1577	59.4341
0.1578	57.501
0.1579	61.6894
0.158	55.8901
0.1581	58.1454
0.1582	55.8901
0.1583	59.7563
0.1584	59.4341
0.1585	57.501
0.1586	52.6683
0.1587	56.8566
0.1588	60.4007
0.1589	55.8901
0.159	60.0785
0.1591	59.4341
0.1592	60.7228
0.1593	55.8901
0.1594	56.8566
0.1595	57.8232
0.1596	56.2123
0.1597	54.2792
0.1598	60.7228
0.1599	53.957
0.16	52.6683
0.1601	50.0908
0.1602	53.3126
0.1603	54.9235
0.1604	51.3795
0.1605	49.7686
0.1606	49.4464
0.1607	42.6806
0.1608	49.7686
0.1609	52.3461
0.161	51.0574
0.1611	52.9905
0.1612	52.3461
0.1613	51.0574
0.1614	48.4799
0.1615	49.4464
0.1616	51.3795
0.1617	50.0908
0.1618	51.0574
0.1619	47.8355
0.162	47.1912
0.1621	51.7017
0.1622	46.869
0.1623	44.6137
0.1624	42.3584
0.1625	45.9024
0.1626	48.1577
0.1627	45.2581
0.1628	45.2581
0.1629	46.5468
0.163	45.5802
0.1631	43.6472
0.1632	44.2915
0.1633	43.0028
0.1634	46.2246
0.1635	43.9693
0.1636	42.0362
0.1637	42.6806
0.1638	42.3584
0.1639	45.2581
0.164	44.2915
0.1641	49.1243
0.1642	44.6137
0.1643	40.4253
0.1644	43.325
0.1645	43.325
0.1646	46.2246
0.1647	43.6472
0.1648	41.0697
0.1649	47.1912
0.165	49.4464
0.1651	41.7141
0.1652	45.2581
0.1653	48.4799
0.1654	49.7686
0.1655	45.5802
0.1656	40.7475
0.1657	47.1912
0.1658	45.2581
0.1659	42.3584
0.166	40.7475
0.1661	37.8479
0.1662	45.5802
0.1663	42.0362
0.1664	42.3584
0.1665	41.7141
0.1666	37.2035
0.1667	41.0697
0.1668	42.6806
0.1669	40.7475
0.167	41.3919
0.1671	41.0697
0.1672	37.5257
0.1673	39.781
0.1674	39.1366
0.1675	33.0151
0.1676	41.0697
0.1677	41.0697
0.1678	39.1366
0.1679	40.1031
0.168	43.0028
0.1681	40.7475
0.1682	41.7141
0.1683	38.17
0.1684	38.8144
0.1685	40.4253
0.1686	38.17
0.1687	42.6806
0.1688	45.9024
0.1689	40.7475
0.169	37.2035
0.1691	38.4922
0.1692	36.8813
0.1693	37.8479
0.1694	34.9482
0.1695	37.5257
0.1696	43.0028
0.1697	38.17
0.1698	37.5257
0.1699	39.781
0.17	36.5591
0.1701	35.5926
0.1702	35.2704
0.1703	38.8144
0.1704	37.8479
0.1705	33.9817
0.1706	37.2035
0.1707	41.3919
0.1708	37.2035
0.1709	38.8144
0.171	42.6806
0.1711	37.2035
0.1712	41.0697
0.1713	36.8813
0.1714	35.2704
0.1715	40.4253
0.1716	41.7141
0.1717	42.6806
0.1718	39.781
0.1719	37.5257
0.172	41.0697
0.1721	39.4588
0.1722	38.4922
0.1723	37.8479
0.1724	37.2035
0.1725	37.2035
0.1726	41.3919
0.1727	37.8479
0.1728	39.781
0.1729	38.4922
0.173	37.5257
0.1731	36.2369
0.1732	37.8479
0.1733	37.5257
0.1734	33.6595
0.1735	38.4922
0.1736	37.8479
0.1737	40.4253
0.1738	35.9148
0.1739	38.4922
0.174	35.9148
0.1741	37.2035
0.1742	36.5591
0.1743	32.0486
0.1744	32.0486
0.1745	33.9817
0.1746	33.0151
0.1747	30.1155
0.1748	34.626
0.1749	33.0151
0.175	34.9482
0.1751	37.2035
0.1752	33.0151
0.1753	35.2704
0.1754	36.2369
0.1755	37.2035
0.1756	35.5926
0.1757	33.9817
0.1758	33.3373
0.1759	33.0151
0.176	32.3708
0.1761	33.0151
0.1762	34.3038
0.1763	32.6929
0.1764	33.3373
0.1765	34.3038
0.1766	30.1155
0.1767	34.9482
0.1768	39.781
0.1769	35.2704
0.177	30.1155
0.1771	29.7933
0.1772	27.8602
0.1773	31.082
0.1774	33.0151
0.1775	32.0486
0.1776	26.2493
0.1777	29.7933
0.1778	34.9482
0.1779	32.3708
0.178	28.8267
0.1781	31.082
0.1782	29.4711
0.1783	33.0151
0.1784	32.6929
0.1785	30.7598
0.1786	31.082
0.1787	28.5046
0.1788	29.4711
0.1789	33.3373
0.179	29.4711
0.1791	28.5046
0.1792	27.538
0.1793	28.8267
0.1794	25.2827
0.1795	24.9605
0.1796	26.5715
0.1797	30.7598
0.1798	29.7933
0.1799	29.1489
0.18	30.7598
0.1801	28.1824
0.1802	26.5715
0.1803	31.4042
0.1804	31.7264
0.1805	32.0486
0.1806	33.6595
0.1807	29.7933
0.1808	30.4377
0.1809	28.8267
0.181	27.8602
0.1811	27.538
0.1812	33.0151
0.1813	30.4377
0.1814	28.1824
0.1815	27.8602
0.1816	30.1155
0.1817	32.6929
0.1818	29.1489
0.1819	31.4042
0.182	29.7933
0.1821	24.9605
0.1822	27.2158
0.1823	25.6049
0.1824	29.7933
0.1825	26.8936
0.1826	25.9271
0.1827	28.5046
0.1828	29.1489
0.1829	22.7053
0.183	26.8936
0.1831	30.1155
0.1832	29.1489
0.1833	25.9271
0.1834	28.1824
0.1835	29.1489
0.1836	27.2158
0.1837	28.5046
0.1838	27.2158
0.1839	28.8267
0.184	26.8936
0.1841	24.9605
0.1842	25.2827
0.1843	27.538
0.1844	26.2493
0.1845	28.1824
0.1846	29.1489
0.1847	29.7933
0.1848	26.8936
0.1849	29.4711
0.185	27.538
0.1851	26.8936
0.1852	28.5046
0.1853	34.626
0.1854	28.1824
0.1855	28.1824
0.1856	29.1489
0.1857	30.7598
0.1858	26.2493
0.1859	24.9605
0.186	25.2827
0.1861	23.994
0.1862	27.2158
0.1863	23.0275
0.1864	25.6049
0.1865	23.6718
0.1866	25.6049
0.1867	25.9271
0.1868	26.2493
0.1869	26.8936
0.187	30.1155
0.1871	26.5715
0.1872	28.5046
0.1873	25.2827
0.1874	27.8602
0.1875	29.7933
0.1876	31.082
0.1877	26.5715
0.1878	33.6595
0.1879	29.7933
0.188	25.9271
0.1881	27.538
0.1882	30.4377
0.1883	29.1489
0.1884	28.8267
0.1885	25.9271
0.1886	27.538
0.1887	29.4711
0.1888	27.2158
0.1889	32.3708
0.189	26.5715
0.1891	27.8602
0.1892	26.5715
0.1893	26.2493
0.1894	29.4711
0.1895	28.8267
0.1896	27.8602
0.1897	27.538
0.1898	25.2827
0.1899	25.2827
0.19	23.3496
0.1901	24.9605
0.1902	25.6049
0.1903	23.994
0.1904	23.6718
0.1905	27.8602
0.1906	31.7264
0.1907	27.8602
0.1908	24.3162
0.1909	27.2158
0.191	27.8602
0.1911	24.3162
0.1912	22.0609
0.1913	24.6384
0.1914	20.1278
0.1915	23.3496
0.1916	23.3496
0.1917	23.6718
0.1918	22.0609
0.1919	21.7387
0.192	25.6049
0.1921	26.5715
0.1922	23.994
0.1923	20.7722
0.1924	23.994
0.1925	26.2493
0.1926	22.7053
0.1927	23.3496
0.1928	26.2493
0.1929	24.6384
0.193	24.6384
0.1931	22.0609
0.1932	23.3496
0.1933	24.6384
0.1934	18.5169
0.1935	19.4834
0.1936	24.9605
0.1937	24.6384
0.1938	25.9271
0.1939	24.6384
0.194	19.4834
0.1941	21.0944
0.1942	25.2827
0.1943	24.9605
0.1944	21.4165
0.1945	21.4165
0.1946	22.3831
0.1947	21.4165
0.1948	20.7722
0.1949	19.1613
0.195	20.45
0.1951	19.8056
0.1952	24.9605
0.1953	19.1613
0.1954	19.4834
0.1955	22.7053
0.1956	24.6384
0.1957	23.6718
0.1958	26.2493
0.1959	18.5169
0.196	20.1278
0.1961	20.45
0.1962	19.4834
0.1963	20.45
0.1964	20.7722
0.1965	18.5169
0.1966	20.7722
0.1967	18.1947
0.1968	19.1613
0.1969	14.6507
0.197	15.6172
0.1971	19.4834
0.1972	19.4834
0.1973	24.6384
0.1974	25.6049
0.1975	19.8056
0.1976	16.2616
0.1977	20.7722
0.1978	16.906
0.1979	20.7722
0.198	14.6507
0.1981	18.8391
0.1982	18.1947
0.1983	18.5169
0.1984	16.906
0.1985	17.2282
0.1986	19.1613
0.1987	17.8725
0.1988	19.4834
0.1989	19.8056
0.199	15.6172
0.1991	14.9729
0.1992	14.0063
0.1993	18.8391
0.1994	19.1613
0.1995	11.4289
0.1996	14.6507
0.1997	16.2616
0.1998	15.6172
[truncated: 53,001 more rows]

## Sheet: Figure 2F
Time (s)	ACSF									CTOP												TIPP-Psi
0	0.742425	1.32616	1.40108	0.8014	0.940518	0.934399	0.787252	1.48059	1.06763	0.864335	0.722393	1.04746	0.988485	1.132	0.988787	0.983244	1.09818	0.797903	0.947596	1.11948	1.41764	1.11807	0.844955	1.1226	0.736162	0.862966	0.750087	1.26089	0.5736
0.1	1.05176	0.970624	0.854111	1.05214	0.945603	1.03693	1.03071	0.936757	0.755163	1.19688	0.770186	1.03194	1.1791	1.03028	0.962377	1.1478	1.03185	0.961095	0.895337	0.820604	1.02899	1.13414	1.02276	1.1259	1.00957	1.01885	1.37217	1.16662	0.733311
0.2	0.938534	0.934606	1.02548	0.837302	0.809669	1.07496	0.869756	0.79982	1.06499	0.970518	0.883285	1.23379	0.826994	1.04881	1.07081	0.890414	1.15018	0.888302	0.98862	0.973948	1.11243	1.0325	0.926636	1.04037	0.973059	0.907046	0.847543	0.892968	1.03319
0.3	1.19549	0.504011	0.847957	1.01307	0.920493	0.964662	1.05022	0.849877	0.876344	1.46288	1.00557	1.12608	0.842359	1.03429	0.555629	0.853136	1.31837	0.893504	0.929523	0.935301	1.51734	0.905766	0.846715	1.1046	1.02569	1.39929	0.905737	1.02379	0.827974
0.4	0.978711	0.718019	1.17145	1.08431	1.1521	0.620566	1.16431	0.908836	1.19663	0.746574	0.836591	1.09328	1.39083	0.89105	1.33605	1.12247	0.854242	0.966202	1.17388	0.739595	0.760101	1.18069	1.06755	0.883308	0.847992	1.32237	1.01016	0.972544	1.58164
0.5	0.859844	1.47637	1.22739	1.05527	0.872955	1.03072	0.893597	1.08702	0.75233	0.676075	1.18329	1.11518	0.789965	1.04347	1.36598	0.86136	0.914047	1.04922	1.01691	0.911246	0.718405	0.830677	0.895348	0.882199	1.1221	0.616667	1.28067	0.698239	0.922287
0.6	1.07154	0.862618	1.28467	1.24343	0.983129	1.26465	1.27515	0.79766	1.3199	0.73241	0.993023	0.84661	1.19676	0.822564	0.661967	1.05857	1.11757	1.19094	1.03364	1.16847	0.778229	1.01902	1.18449	1.17068	1.22772	1.05788	0.973961	0.837539	1.05573
0.7	1.0584	1.19854	0.565741	0.8684	1.33856	1.12297	0.887002	0.906044	1.31018	0.963724	1.17837	0.690705	0.906484	0.936867	0.85105	0.883637	1.07612	1.07734	1.07809	1.03531	1.40066	1.13144	1.03528	0.961379	1.1483	0.674625	1.24691	1.19032	0.955247
0.8	0.954213	1.00729	0.890923	1.12538	1.01778	0.937887	1.20705	1.06818	0.62676	0.971683	1.28028	1.25899	0.941509	1.28769	1.05511	1.06359	0.760558	0.7751	1.04925	1.20296	0.844839	0.791062	1.05757	0.764485	1.10885	1.08324	0.973112	1.10396	1.12007
0.9	0.922606	0.613892	1.06976	0.861771	1.15153	1.1901	1.06472	0.999228	0.993555	1.28359	1.07863	0.865133	1.05644	1.01397	1.2113	0.72092	0.933433	1.22808	0.913367	1.36446	0.853939	1.13743	1.12964	0.999233	1.07257	1.13706	0.890674	0.986956	1.21309
1	1.22647	1.38787	0.661444	1.05752	0.867662	0.822145	0.77023	1.16598	1.03651	1.13132	1.06838	0.690823	0.881075	0.759012	0.940929	1.41485	0.745447	1.17231	0.973789	0.728625	0.567421	0.719205	0.989048	0.945257	0.727987	0.920001	0.748977	0.866167	0.983863
1.1	1.04246	0.380911	0.713991	0.872613	0.850456	0.520695	0.937811	0.93962	1.57221	1.25062	0.925096	1.3433	0.789266	0.839624	0.585788	0.656807	1.04716	0.948793	0.795534	0.736583	0.868211	1.11696	1.27441	1.24404	0.997878	0.95348	0.675307	0.856702	1.10834
1.2	0.705971	0.568132	0.994821	0.767764	0.829611	0.5195	0.393778	0.628744	0.799323	0.495511	0.708903	1.21326	0.850223	0.752252	0.686543	0.563905	0.303237	0.960552	0.830942	0.77418	1.19868	1.011	0.704689	0.81059	1.14534	1.08356	0.774013	0.801622	0.810998
1.3	0.594703	0.369852	1.08346	0.333254	0.47642	0.897316	0.395222	0.422052	0.626464	0.59879	0.506989	0.662736	0.723074	0.980812	0.530684	0.526698	0.972781	0.798782	0.781732	0.65576	0.840481	0.843688	0.940388	0.81016	0.899813	0.962667	0.922241	0.738447	1.01932
1.4	0.405253	0.462207	0.304242	0.727966	0.658477	0.295857	0.302521	0.471492	0.686403	0.396043	0.80559	0.823438	1.04916	0.873567	1.05071	0.885338	0.626645	0.428699	0.59283	0.659981	1.24032	0.817047	0.687449	0.657454	0.981191	0.864818	0.96134	1.06729	1.04574
1.5	0.516301	0.171059	0.798558	0.372463	0.5151	0.516599	0.154553	0.290476	1.11463	0.483283	0.702452	0.798127	0.603791	0.826654	0.819602	0.723577	0.856779	0.713996	0.576201	0.54563	0.973474	0.535793	0.678132	0.771374	0.959425	0.738417	0.825101	0.862099	1.0595
1.6	0.478536	0.260199	0.593435	0.454796	0.86189	0.484416	0.165922	0.35238	0.53409	0.308139	0.538941	0.555722	0.984492	0.49847	0.411608	0.44626	0.362075	0.765941	0.520945	0.821338	1.27909	1.11365	0.677643	0.583418	0.873075	0.677079	0.536389	0.592466	0.769117
1.7	0.56908	0.460633	0.641018	0.297407	0.733447	0.411417	0.151656	0.41649	0.482762	0.300311	0.313118	0.811399	0.825052	0.687607	0.464626	0.23473	0.676797	0.391161	0.5968	0.422645	1.03612	0.459191	0.623782	0.60049	0.804404	0.669347	0.446359	0.96903	0.923494
1.8	0.122618	0.478489	0.707524	0.351159	0.423416	0.412047	0.305437	0.213259	0.35569	0.356194	0.40286	0.731196	0.441413	0.71013	0.538064	0.34346	0.395504	0.55879	0.600519	0.54389	0.829159	1.07431	0.601243	0.943005	0.396355	0.497526	0.775981	0.761761	1.088
1.9	0.171288	0.226811	0.584382	0.268996	0.473217	0.407342	0.280718	0.318192	0.289696	0.484834	0.298137	0.633864	0.466622	0.564126	0.323669	0.380865	0.460615	0.429185	0.523497	0.366018	0.956263	0.542697	0.767911	0.872451	0.756431	0.648788	0.498581	0.658655	0.965085
2	0.486733	0.195828	0.658734	0.315879	0.499025	0.213392	0.115495	0.189744	1.0529	0.403661	0.708742	0.730987	0.982172	0.535087	0.367848	0.520431	0.336806	0.47496	0.336999	0.251517	0.570106	0.563414	0.843156	0.759752	0.431566	0.64461	0.329792	0.666556	0.789858
2.1	0.443613	0.103276	0.411851	0.352481	0.524987	0.212915	0.171074	0.334904	0.633872	0.248294	0.51599	0.506962	0.641051	0.660145	0.692749	0.131658	0.472878	0.496885	0.523328	0.43649	0.765392	0.738497	0.775914	0.628489	0.88348	0.38033	0.518847	0.715463	1.03895
2.2	0.132433	0.458915	0.726352	0.309097	0.311983	0.174825	0.206964	0.19378	0.810706	0.51997	0.611118	0.334481	0.746104	0.440404	0.846902	0.41138	0.214555	0.662835	0.393776	0.61579	0.928295	0.762358	0.573452	0.763375	0.464151	0.300779	0.422225	0.717805	1.01769
2.3	0.378165	0.259821	0.236283	0.269126	0.414357	0.318246	0.325848	0.453966	0.302854	0.475369	0.591118	0.654439	0.478832	0.710297	0.947295	0.164551	0.718317	0.413588	0.381894	0.400984	0.706366	0.372765	0.495808	0.830908	0.446348	0.765809	0.702793	0.473162	1.17806
2.4	0.308497	0.36114	0.417395	0.386853	0.361472	0.346069	0.246282	0.181294	0.712326	0.198087	0.389316	0.524401	0.568622	0.561449	0.151928	0.366129	0.0857682	0.714361	0.448431	0.387414	0.675291	0.270274	0.730691	0.662668	0.513239	0.628759	0.284647	0.534043	0.720189
2.5	0.121759	0.146577	0.661972	0.405158	0.37127	0.616062	0.306723	0.392264	0.683982	0.44171	0.342558	0.632768	0.890898	0.693079	0.335313	0.318921	0.576978	0.377913	0.466772	0.585549	0.686568	0.778525	0.51125	0.539	0.572185	0.519632	0.649659	0.552205	0.851726
2.6	0.16967	0.101572	0.372794	0.337742	0.41681	0.293771	0.0376627	0.21138	0.531405	0.261721	0.417152	0.742405	0.489501	0.449524	0.34687	0.572138	0.373488	0.259166	0.486187	0.4196	0.244832	0.276139	0.460026	0.752624	0.389275	0.385264	0.361484	0.499466	1.11864
2.7	0.285783	0.380717	0.469993	0.248603	0.406269	0.138091	0.359407	0.167951	0.494442	0.555088	0.437558	0.558063	0.722463	0.506207	0.638358	0.461943	0.0900959	0.324919	0.318285	0.317736	0.980168	0.160249	0.467811	0.823205	0.525318	0.472253	0.286621	0.661171	0.97509
2.8	0.23269	0.433007	0.467704	0.32976	0.470345	0.24436	0.188449	0.236421	0.347803	0.304793	0.281219	0.734877	0.618595	0.315165	0.638312	0.20686	0.642066	0.58873	0.509558	0.532802	0.594507	0.811122	0.529044	0.817174	0.822256	0.487798	0.872539	0.679646	1.05592
2.9	0.308683	0.194849	0.539333	0.429207	0.641312	0.240676	0.416848	0.123268	0.464757	0.444768	0.603502	0.454803	0.49135	0.49172	0.588066	0.217924	0.349696	0.747736	0.375003	0.406908	1.13672	0.494754	0.406599	0.695162	0.469521	0.660015	0.722946	0.835532	1.04297
3	0.248134	0.515783	0.583309	0.48865	0.448954	0.459638	0.193098	0.625841	0.334395	0.266618	0.43502	0.416555	0.576783	0.595553	0.380242	0.416327	0.306146	0.610247	0.455701	0.292521	1.25592	0.199998	0.567118	0.807595	0.601007	0.345443	0.451557	0.508768	0.659264
3.1	0.190267	0.283798	0.712477	0.359494	0.335839	0.374529	0.268324	0.251867	0.515241	0.514506	0.737833	0.522831	0.926347	0.400274	0.524495	0.206269	0.41759	0.350913	0.440365	0.669802	0.513289	0.237442	0.56022	0.687775	0.543852	0.575804	0.357279	0.457869	1.06497
3.2	0.159938	0.498437	0.36226	0.223476	0.208469	0.490794	0.144704	0.225902	0.370018	0.395579	0.50208	1.26697	0.564411	0.579263	1.03439	0.305663	1.01727	0.555994	0.569718	0.422073	0.558048	0.950073	0.5041	0.773674	0.505943	0.461646	0.274135	0.73707	0.904211
3.3	0.170477	0.142587	0.461259	0.369787	0.436561	0.450135	0.325245	0.186623	0.29221	0.354394	0.603952	0.442985	0.722597	0.530008	0.518213	0.253469	0.452922	0.710007	0.429304	0.199142	0.528411	0.621519	0.769922	0.754685	0.777893	0.580053	0.808341	0.860468	0.910041
3.4	0.327682	0.216286	0.640831	0.335498	0.594913	0.304791	-0.0182948	0.197725	0.621736	0.254534	0.242252	0.685997	0.662913	0.412126	0.722583	0.298393	0.202864	0.530134	0.343226	0.585673	0.725985	0.168118	0.614949	0.917789	0.589117	0.665099	0.287353	0.815624	0.614731
3.5	0.29008	0.202311	0.630107	0.26463	0.461492	0.164743	0.397966	0.255593	0.436039	0.167767	0.287386	0.529027	0.447352	0.598035	0.207336	0.305113	0.502512	0.365608	0.313049	0.410795	0.439617	0.456759	0.719176	0.682129	1.00525	0.544256	0.464602	0.590021	0.473011
3.6	0.353878	0.252623	0.627849	0.296637	0.444597	0.558281	0.355336	0.272935	0.0914649	0.28879	0.573875	0.650738	0.694239	0.586208	1.14302	0.506424	0.128388	0.869427	0.428351	0.632115	0.447871	0.393927	0.610845	0.517078	0.622279	0.48011	0.345953	0.601306	0.917875
3.7	0.15549	0.284951	0.323707	0.351505	0.610052	0.34852	0.157293	0.311016	0.172946	0.141014	0.268455	0.564146	0.430364	0.629057	0.66677	0.263861	0.591722	0.988579	0.430666	0.841046	0.22538	0.289697	0.498863	0.726292	0.865498	0.500257	0.386383	0.946724	0.948684
3.8	0.226653	0.286552	0.513424	0.332073	0.493774	0.194607	0.409247	0.124542	0.388951	0.276973	0.600688	0.426549	0.434953	0.507272	0.355357	0.204894	0.433723	0.509698	0.477746	0.313975	0.421072	0.459283	0.519403	0.717714	0.579474	0.61951	0.568736	0.778513	0.589865
3.9	0.259601	0.459878	0.431246	0.377797	0.468527	0.416325	0.243369	0.324183	0.275528	0.201588	0.346017	0.332898	0.33042	0.492529	0.219259	0.295851	0.0540459	0.484341	0.290282	0.214198	0.55619	0.417141	0.674433	0.884475	0.45058	0.80407	0.405291	0.606685	1.06105

## Sheet: Figure 2G-H
Figure 2G: Tau (ms)
10 Hz			20 Hz			50 Hz
ACSF	CTOP	TIPP-Psi	ACSF	CTOP	TIPP-Psi	ACSF	CTOP	TIPP-Psi
321.47	225.69	1460.1	163.8	377.88	761.26	360.25	677.7	341.36
49.837	285.52	438.01	228.89	341.41	746.5	273.71	173.9	743.01
823.63	922.13	209.07	213.63	474.2	681.95	1248.5	893.18	777.02
255.31	302.13	476.99	266.71	273.29	676.64	263.39	822.93	442.28
370.99	280.01	973.11	213.32	1303.7	715.18	198.72	819.01	1716.1
170.3	602.22	725.02	440.18	263.58	516.3	505.64	456.87
483.24	280.76	636.01	317.06	90.786		487.12	227.38
223.73	486.47		228.11	77.439		191.48	539.21
902.85	496.38			196.29			346.55
				483.51
				727.98
Figure 2H: Fraction IPSC Suppression
ACSF			CTOP			TIPP-Psi
10 Hz	20 Hz	50 Hz	10 Hz	20 Hz	50 Hz	10 Hz	20 Hz	50 Hz
0.76178	0.591987	0.573141	0.713824	0.78132	0.679765	0.580604	0.477852	0.649104
0.685679	0.757097	0.658297	0.540244	0.458713	0.319589	0.396097	0.481289	0.162991
0.471353	0.610058	0.690996	0.41613	0.479067	0.512167	0.253079	0.326557	0.327475
0.660045	0.722249	0.577069	0.420962	0.470278	0.251691	0.442375	0.428599	0.245339
0.623764	0.385891	0.348817	0.466967	0.504223	0.436991	0.565037	0.532257	0.486336
0.752371	0.734789	0.77691	0.422834	0.493491	0.45158	0.345911	0.395899	0.129149
0.549682	0.530758	0.522089	0.694374	0.596945	0.658347	0.309695	0.348879	0.384177
0.722377	0.611909	0.327499	0.589282	0.523253	0.363347	0.18563	-0.03032	0.226635
0.650147	0.443402	0.04372	0.402505	0.368731	0.335253
			0.582159	0.537951	0.631401
			0.541866	0.357488	0.19082
			0.432822	0.535346
