# Supplementary figures and images for: Convergent, functionally independent signaling by mu and delta opioid receptors in hippocampal parvalbumin interneurons
Source: eLife journal article supplement (doi:10.7554/elife.69746), 2021-11-17

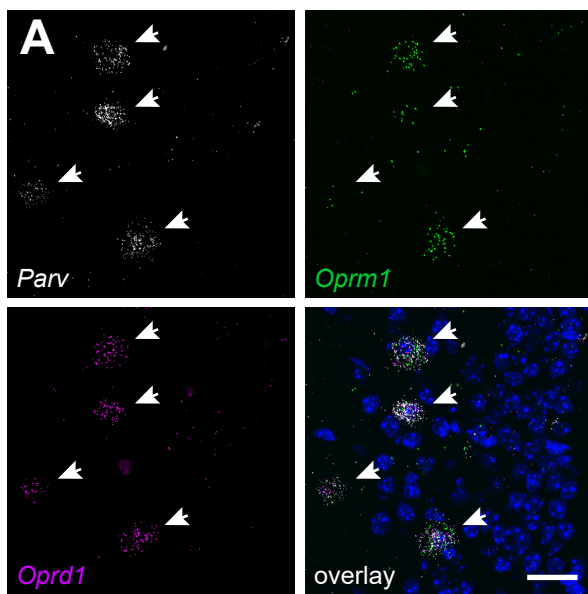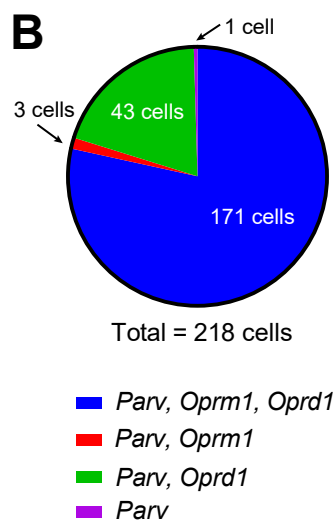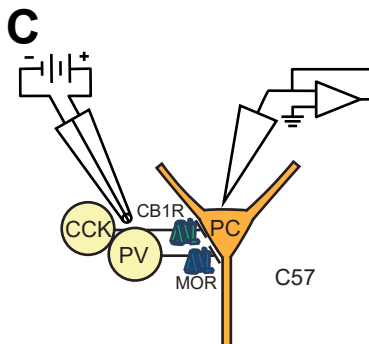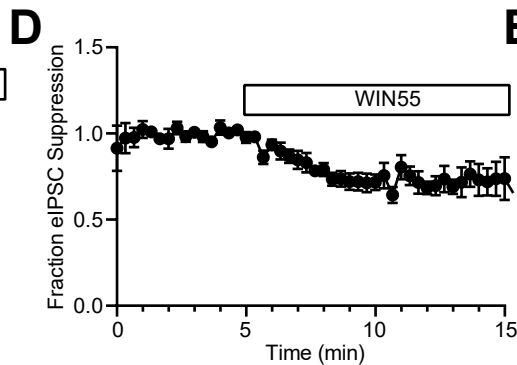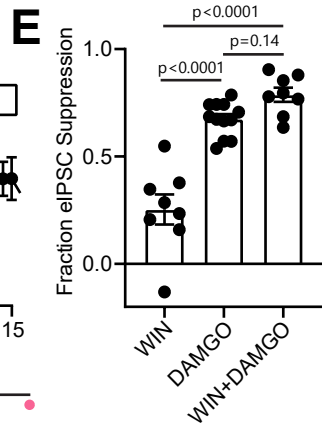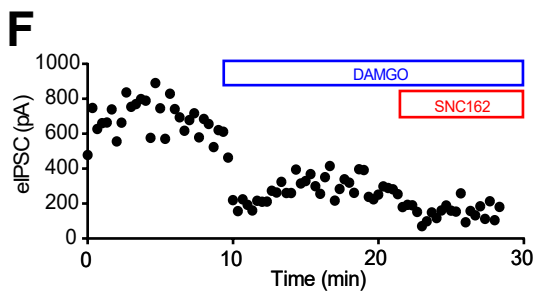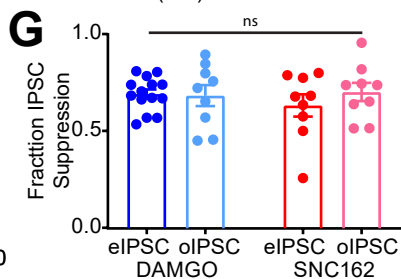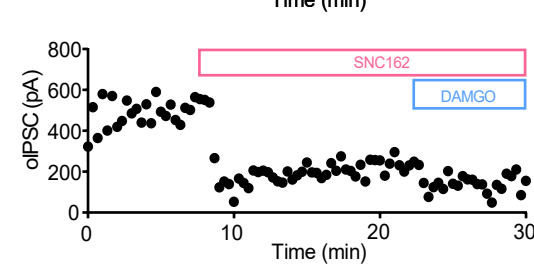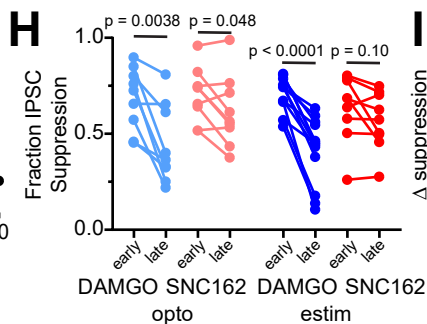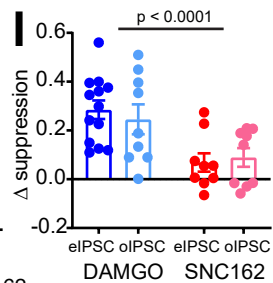

Supplement: supp [file elife-69746-supp-v2.zip]

**A**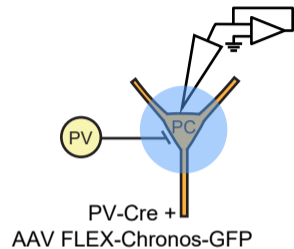**B**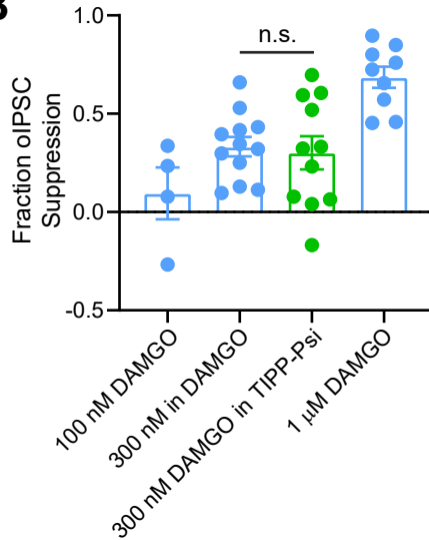**C**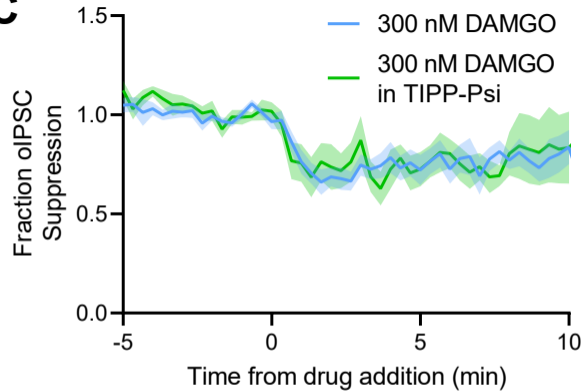

Supplement: supp [file elife-69746-supp-v2.zip]

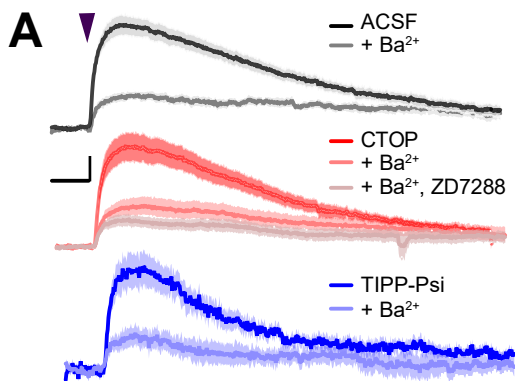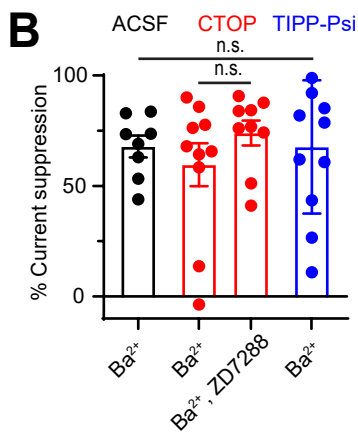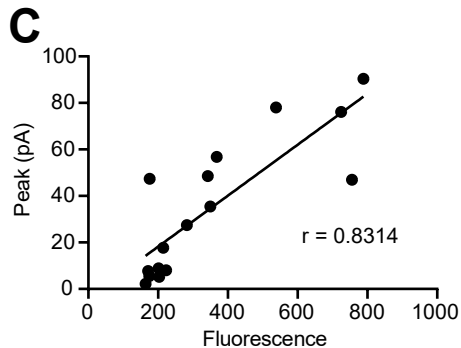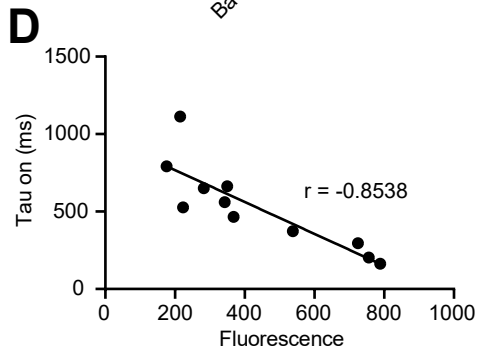

Supplement: supp [file elife-69746-supp-v2.zip]
